# Supplementary material for: Single-cell transcriptome analysis of fish immune cells provides insight into the evolution of vertebrate immune cell types
Source: Genome Res. 2017 Mar;27(3):451–61. doi: 10.1101/gr.207704.116 (PMC5340972; doi:10.1101/gr.207704.116)
Supplement: Supplemental Material [file supp_gr.207704.116_Supplemental_Table_S1.xlsx]

## Sheet: ZebrafishSignatureGenes
TcellSignatureGeneName	TcellSignatureGeneID	NKSignatureGeneName	NKSignatureGeneID	MyeloikdSignatureGeneName	MyeloidSignatureGeneID
tbxas1	ENSDARG00000002249	nitr2b	ENSDARG00000000460	spi1b	ENSDARG00000000767
gbas	ENSDARG00000007264	tbc1d14	ENSDARG00000003520	aif1l	ENSDARG00000009336
crnkl1	ENSDARG00000007901	syk	ENSDARG00000008186	si.dkey.9i23.4	ENSDARG00000051993
pigc	ENSDARG00000009113	sh3bp2	ENSDARG00000021982	si.ch211.133n4.10	ENSDARG00000063613
MMP25..1.to.many.	ENSDARG00000010556	myl12.2	ENSDARG00000025326	nkl.3	ENSDARG00000089202
sirt2	ENSDARG00000011488	PRR5L	ENSDARG00000029431	zgc.158446	ENSDARG00000090730
usp25	ENSDARG00000012314	klf12b	ENSDARG00000032197	ccl33.3	ENSDARG00000099401
RRBP1..1.to.many.	ENSDARG00000013763	sept8a	ENSDARG00000032606	fcer1gl	ENSDARG00000104077
gemin2	ENSDARG00000015638	nitr1j	ENSDARG00000033963
sps2	ENSDARG00000017659	nitr7a	ENSDARG00000036743
hspa4b	ENSDARG00000018989	plk3	ENSDARG00000038754
prpsap2	ENSDARG00000019326	ccl38a.5	ENSDARG00000041835
taf7	ENSDARG00000019572	ccl38.6	ENSDARG00000041923
mcrs1	ENSDARG00000020840	nitr2a	ENSDARG00000043398
mxd	ENSDARG00000023369	si.ch211.165b19.5	ENSDARG00000055986
socs3b	ENSDARG00000026611	cmah	ENSDARG00000057714
macf1a	ENSDARG00000028533	nkl.2	ENSDARG00000058673
sgms1	ENSDARG00000029621	nitr7b	ENSDARG00000067977
ddost	ENSDARG00000037318	si.ch211.132b12.7	ENSDARG00000068374
GABARAPL1	ENSDARG00000040971	si.dkey.182i3.11	ENSDARG00000069270
ndst3	ENSDARG00000041776	lpar6b	ENSDARG00000069441
ivd	ENSDARG00000042853	nitr1b	ENSDARG00000069848
nop2	ENSDARG00000043304	si.dkey.31e10.1	ENSDARG00000070502
ccr7	ENSDARG00000044561	cxcl32b.1	ENSDARG00000071499
cd8a	ENSDARG00000044797	si.dkey.19a16.5	ENSDARG00000071656
hpdb	ENSDARG00000044935	zbtb32	ENSDARG00000073726
cd226	ENSDARG00000045391	DGKK	ENSDARG00000074183
myca	ENSDARG00000045695	flna	ENSDARG00000074201
cst14b.1	ENSDARG00000045980	mylk5	ENSDARG00000075164
cd99	ENSDARG00000051975	il2rb	ENSDARG00000075720
myb	ENSDARG00000053666	tnfsf14	ENSDARG00000076274
scaf1	ENSDARG00000054010	nitr3c	ENSDARG00000077998
p2ry8	ENSDARG00000055560	samsn1b	ENSDARG00000078647
nutf2	ENSDARG00000056531	si.ch211.102c2.4	ENSDARG00000079387
rltpr	ENSDARG00000056639	nitr1m	ENSDARG00000087631
uba3	ENSDARG00000057987	dicp3.3	ENSDARG00000087706
si.dkey.184p9.9	ENSDARG00000058682	pxna	ENSDARG00000088590
SUSD1	ENSDARG00000058839	dicp1.1	ENSDARG00000091993
mepce	ENSDARG00000059461	si.ch211.165b19.8	ENSDARG00000093990
mbd5	ENSDARG00000059581	ccl34b.4	ENSDARG00000094002
pik3r4	ENSDARG00000060469	si.ch73.308b14.1	ENSDARG00000095351
raph1b	ENSDARG00000061732	si.ch211.209p16.4	ENSDARG00000096046
tbc1d1	ENSDARG00000062081	znf1120	ENSDARG00000096140
rspry1	ENSDARG00000062558	si.ch211.265g21.1	ENSDARG00000096508
rasa3	ENSDARG00000063371	si.ch211.184m19.3	ENSDARG00000096655
lrch4	ENSDARG00000068258	si.ch73.223p23.2	ENSDARG00000097065
si.ch211.195h23.3	ENSDARG00000068431	si.dkey.29l4.4	ENSDARG00000097533
cry1ba	ENSDARG00000069074	si.dkey.193e13.8	ENSDARG00000097553
txndc9	ENSDARG00000069853	dusp2	ENSDARG00000098108
si.ch211.67e16.2	ENSDARG00000069978	CT574575.1	ENSDARG00000098656
cd4.1	ENSDARG00000070668	faslg	ENSDARG00000098913
mast2	ENSDARG00000074311	si.dkey.183i3.6	ENSDARG00000101767
soul5	ENSDARG00000075015	CABZ01034528.1	ENSDARG00000101860
ppm1g	ENSDARG00000075559	si.dkey.56m19.6	ENSDARG00000102706
wdr43	ENSDARG00000077264	si.rp71.81e14.2	ENSDARG00000103077
tfr1b	ENSDARG00000077372	fcer1g	ENSDARG00000103276
si.ch211.67e16.3	ENSDARG00000078193	BX908792.2	ENSDARG00000105263
foxp3b	ENSDARG00000078279
lrch1	ENSDARG00000078778
si.ch211.79k12.1	ENSDARG00000079175
LPXN	ENSDARG00000079315
zgc.195282	ENSDARG00000079488
mark2a	ENSDARG00000079905
si.dkey.7j14.6	ENSDARG00000090552
traf3ip2l	ENSDARG00000091734
ddx27	ENSDARG00000091831
si.dkey.147f3.4.4	ENSDARG00000092077
si.ch211.214p13.8	ENSDARG00000092106
cox14	ENSDARG00000092124
si.dkey.238c7.13	ENSDARG00000092191
CTLA4	ENSDARG00000095070
si.dkey.29p23.2	ENSDARG00000096166
kiaa0101	ENSDARG00000097691
si.dkey.188h10.3	ENSDARG00000097737
exosc3	ENSDARG00000098334
RFTN1..1.to.many.	ENSDARG00000098654
TSTD2	ENSDARG00000098660
si.dkey.10p5.7	ENSDARG00000098787
sbno2a	ENSDARG00000098801
snrpg	ENSDARG00000099667
ccr9b	ENSDARG00000099738
pim1	ENSDARG00000100020
CU915738.1	ENSDARG00000100088
si.ch1073.435i13.1	ENSDARG00000100400
btr22	ENSDARG00000100539
si.dkey.11f4.20	ENSDARG00000100887
ETFA	ENSDARG00000101631
SPINT1..1.to.many.	ENSDARG00000102332
abhd4	ENSDARG00000102887
ints4	ENSDARG00000102953
prkd2	ENSDARG00000104676
BX897691.1	ENSDARG00000105033
si.ch211.207g17.3	ENSDARG00000105363
CCR8..1.to.many.	ENSDARG00000105467
