# Supplementary material for: Single-cell transcriptome analysis of fish immune cells provides insight into the evolution of vertebrate immune cell types
Source: Genome Res. 2017 Mar;27(3):451–61. doi: 10.1101/gr.207704.116 (PMC5340972; doi:10.1101/gr.207704.116)
Supplement: Supplemental Material [file supp_gr.207704.116_Supplemental_Table_S2.xlsx]

## Sheet: C1vs(C2,C3)
Ensembl Gene ID	Gene Name	Fold Change	Z-score	adjusted Z-score	Description	% sequence identity against mouse ortholog	% sequence identity against human ortholog	Gene Type	transMembrane	signalPeptide
ENSDARG00000044561	ccr7	9.78771	7.16081	6.11578	chemokine (C-C motif) receptor 7 [Source:ZFIN;Acc:ZDB-GENE-060522-2]	48	48	protein_coding	TRUE	FALSE
ENSDARG00000062510	bcl11ba	9.05819	4.985	3.73267	B-cell CLL/lymphoma 11Ba (zinc finger protein) [Source:ZFIN;Acc:ZDB-GENE-061207-62]	70	72	protein_coding	FALSE	FALSE
ENSDARG00000023369	mxd	9.02779	5.11802	3.88531	myxovirus (influenza virus) resistance D [Source:ZFIN;Acc:ZDB-GENE-030721-8]	0	0	protein_coding	FALSE	FALSE
ENSDARG00000092903	zgc.153317	8.99739	3.43592	2.06066	zgc:153317 [Source:ZFIN;Acc:ZDB-GENE-060825-309]	56	56	protein_coding	TRUE	FALSE
ENSDARG00000044797	cd8a	8.87581	7.03092	5.99311	CD8a molecule [Source:ZFIN;Acc:ZDB-GENE-060210-2]	0	0	protein_coding	TRUE	TRUE
ENSDARG00000051975	cd99l2	8.87581	5.599	4.42569	CD99 molecule [Source:ZFIN;Acc:ZDB-GENE-061103-391]	23	25	protein_coding	TRUE	TRUE
ENSDARG00000069978	cd28	8.87581	5.57414	4.40065	si:ch211-67e16.2 [Source:ZFIN;Acc:ZDB-GENE-070912-309]	0	0	protein_coding	TRUE	TRUE
ENSDARG00000094295	si.dkey.4i23.7	8.84541	3.17998	1.77482	si:dkey-4i23.7 [Source:ZFIN;Acc:ZDB-GENE-070912-545]	0	0	lincRNA	NA	NA
ENSDARG00000078042	il10rb	8.81501	3.19909	1.79555	interleukin 10 receptor, beta [Source:ZFIN;Acc:ZDB-GENE-050909-1]	19	23	protein_coding	TRUE	TRUE
ENSDARG00000095070	CTLA4	8.78462	7.1548	6.11578	si:ch211-67e16.2 [Source:ZFIN;Acc:ZDB-GENE-070912-309]	21	22	protein_coding	TRUE	TRUE
ENSDARG00000010556	MMP25..1.to.many.	8.72382	7.06027	6.02216	matrix metallopeptidase 25 [Source:HGNC Symbol;Acc:HGNC:14246]	0	0	protein_coding	FALSE	TRUE
ENSDARG00000056481	vat1	8.60224	3.19659	1.79337	vesicle amine transport 1 [Source:ZFIN;Acc:ZDB-GENE-030616-178]	51	51	protein_coding	FALSE	FALSE
ENSDARG00000054548	si.ch73.285p12.4	8.57184	3.04376	1.6276	si:ch73-285p12.4 [Source:ZFIN;Acc:ZDB-GENE-110411-145]	0	0	protein_coding	FALSE	FALSE
ENSDARG00000098787	tcell-cd7-like	8.54144	6.91279	5.87463	si:dkey-10p5.7 [Source:ZFIN;Acc:ZDB-GENE-061207-47]	0	0	protein_coding	TRUE	TRUE
ENSDARG00000055186	ccr9a	8.48065	5.48561	4.29869	chemokine (C-C motif) receptor 9a [Source:ZFIN;Acc:ZDB-GENE-060130-125]	44	44	protein_coding	TRUE	FALSE
ENSDARG00000010032	cmtm7	8.45025	3.20801	1.80368	CKLF-like MARVEL transmembrane domain containing 7 [Source:ZFIN;Acc:ZDB-GENE-041111-174]	44	51	protein_coding	TRUE	FALSE
ENSDARG00000058682	cd8b	8.45025	7.00599	5.96907	si:dkey-184p9.9 [Source:ZFIN;Acc:ZDB-GENE-091204-31]	0	0	protein_coding	TRUE	TRUE
ENSDARG00000062081	tbc1d1	8.45025	4.14051	2.788	TBC1 (tre-2/USP6, BUB2, cdc16) domain family, member 1 [Source:ZFIN;Acc:ZDB-GENE-060710-1]	52	52	protein_coding	FALSE	FALSE
ENSDARG00000042533	gstm.1	8.41986	2.60218	1.09047	glutathione S-transferase mu, tandem duplicate 1 [Source:ZFIN;Acc:ZDB-GENE-030911-2]	58	64	protein_coding	FALSE	FALSE
ENSDARG00000105363	si.ch211.207g17.3	8.41986	3.91943	2.56726	si:ch211-207g17.3 [Source:ZFIN;Acc:ZDB-GENE-160113-21]	NA	NA	protein_coding	NA	NA
ENSDARG00000014591	ilf2	8.38946	2.03834	0.225458	interleukin enhancer binding factor 2 [Source:ZFIN;Acc:ZDB-GENE-040426-2345]	89	89	protein_coding	FALSE	FALSE
ENSDARG00000057633	cxcr4a	8.35906	6.84194	5.7963	chemokine (C-X-C motif) receptor 4a [Source:ZFIN;Acc:ZDB-GENE-020102-1]	66	66	protein_coding	TRUE	FALSE
ENSDARG00000078193	si.ch211.67e16.3	8.35906	4.59551	3.28519	si:ch211-67e16.3 [Source:ZFIN;Acc:ZDB-GENE-070912-310]	0	0	protein_coding	TRUE	TRUE
ENSDARG00000058593	sri	8.32867	1.98553	0.12925	sorcin [Source:ZFIN;Acc:ZDB-GENE-040426-1356]	71	73	protein_coding	FALSE	FALSE
ENSDARG00000069422	nhp2	8.32867	3.77847	2.42065	NHP2 ribonucleoprotein homolog (yeast) [Source:ZFIN;Acc:ZDB-GENE-030131-533]	67	72	protein_coding	FALSE	FALSE
ENSDARG00000099635	akap8l	8.32867	2.85369	1.40389	A kinase (PRKA) anchor protein 8-like [Source:ZFIN;Acc:ZDB-GENE-040426-2303]	30	30	protein_coding	FALSE	FALSE
ENSDARG00000044083	peli1b	8.29827	4.03876	2.69429	pellino E3 ubiquitin protein ligase 1b [Source:ZFIN;Acc:ZDB-GENE-061027-372]	0	0	protein_coding	FALSE	FALSE
ENSDARG00000070261	crlf3	8.29827	1.76848	0	cytokine receptor-like factor 3 [Source:ZFIN;Acc:ZDB-GENE-050417-354]	65	65	protein_coding	FALSE	FALSE
ENSDARG00000075014	sqstm1	8.29827	2.22224	0.553966	sequestosome 1 [Source:ZFIN;Acc:ZDB-GENE-040426-2204]	47	48	protein_coding	FALSE	FALSE
ENSDARG00000089413	mbpb	8.29827	3.30932	1.9221	myelin basic protein b [Source:ZFIN;Acc:ZDB-GENE-030429-21]	44	48	protein_coding	FALSE	FALSE
ENSDARG00000011740	u2af2b	8.26788	2.45853	0.892139	U2 small nuclear RNA auxiliary factor 2b [Source:ZFIN;Acc:ZDB-GENE-040426-1881]	0	0	protein_coding	FALSE	FALSE
ENSDARG00000078308	spry2	8.26788	2.91019	1.46448	sprouty RTK signaling antagonist 2 [Source:ZFIN;Acc:ZDB-GENE-030131-7038]	53	54	protein_coding	FALSE	FALSE
ENSDARG00000043781	PSMB10	8.23748	3.22801	1.82381	zgc:92791 [Source:ZFIN;Acc:ZDB-GENE-040718-278]	61	62	protein_coding	FALSE	FALSE
ENSDARG00000104227	nop10	8.23748	3.33035	1.94511	NOP10 ribonucleoprotein homolog (yeast) [Source:ZFIN;Acc:ZDB-GENE-041007-4]	80	80	protein_coding	FALSE	FALSE
ENSDARG00000105438	si.ch1073.220m6.1	8.23748	3.1322	1.7257	si:ch1073-220m6.1 [Source:ZFIN;Acc:ZDB-GENE-160113-85]	NA	NA	protein_coding	NA	NA
ENSDARG00000000656	psmb9a	8.20708	2.1537	0.444466	proteasome subunit beta 9a [Source:ZFIN;Acc:ZDB-GENE-990415-140]	63	63	protein_coding	FALSE	FALSE
ENSDARG00000004830	flot2a	8.20708	3.17347	1.76686	flotillin 2a [Source:ZFIN;Acc:ZDB-GENE-020430-3]	79	79	protein_coding	FALSE	FALSE
ENSDARG00000058232	fbrsl1	8.20708	3.28158	1.88684	fibrosin-like 1 [Source:ZFIN;Acc:ZDB-GENE-070705-487]	38	40	protein_coding	FALSE	FALSE
ENSDARG00000101009	cited4b	8.20708	2.37314	0.777364	Cbp/p300-interacting transactivator, with Glu/Asp-rich carboxy-terminal domain, 4b [Source:ZFIN;Acc:ZDB-GENE-030425-5]	0	0	protein_coding	FALSE	FALSE
ENSDARG00000016173	cct3	8.17669	2.67371	1.18178	chaperonin containing TCP1, subunit 3 (gamma) [Source:ZFIN;Acc:ZDB-GENE-020419-5]	85	85	protein_coding	FALSE	FALSE
ENSDARG00000044601	rtn4a	8.17669	1.99829	0.151777	reticulon 4a [Source:ZFIN;Acc:ZDB-GENE-030710-1]	46	48	protein_coding	TRUE	FALSE
ENSDARG00000091951	NUGGC..1.to.many..4	8.17669	2.91787	1.47436	si:dkeyp-85e10.2 [Source:ZFIN;Acc:ZDB-GENE-060503-185]	22	21	protein_coding	FALSE	FALSE
ENSDARG00000013892	sorl1	8.14629	3.20869	1.80369	sortilin-related receptor, L(DLR class) A repeats containing [Source:ZFIN;Acc:ZDB-GENE-050208-22]	64	64	protein_coding	TRUE	FALSE
ENSDARG00000043447	gpr55a	8.14629	2.95033	1.51413	G protein-coupled receptor 55a [Source:ZFIN;Acc:ZDB-GENE-051113-260]	28	28	protein_coding	TRUE	FALSE
ENSDARG00000098627	gspt1l	8.14629	2.81212	1.35452	G1 to S phase transition 1, like [Source:ZFIN;Acc:ZDB-GENE-030131-4009]	76	77	protein_coding	FALSE	FALSE
ENSDARG00000099241	ppp2cb	8.11589	2.11616	0.370166	protein phosphatase 2, catalytic subunit, beta isozyme [Source:ZFIN;Acc:ZDB-GENE-040426-2487]	0	0	protein_coding	FALSE	FALSE
ENSDARG00000105023	selplg	8.11589	2.89639	1.45001	selectin P ligand [Source:ZFIN;Acc:ZDB-GENE-120410-1]	21	25	protein_coding	TRUE	TRUE
ENSDARG00000008884	hprt1	8.0855	4.23757	2.88781	hypoxanthine phosphoribosyltransferase 1 [Source:ZFIN;Acc:ZDB-GENE-040426-1918]	89	90	protein_coding	FALSE	FALSE
ENSDARG00000038672	tcf7	8.0855	4.69498	3.38893	transcription factor 7 (T-cell specific, HMG-box) [Source:ZFIN;Acc:ZDB-GENE-050222-4]	39	49	protein_coding	FALSE	FALSE
ENSDARG00000040432	klf2b	8.0855	3.74546	2.38159	Kruppel-like factor 2b [Source:ZFIN;Acc:ZDB-GENE-011109-2]	49	48	protein_coding	FALSE	FALSE
ENSDARG00000058666	dennd2da	8.0855	3.42016	2.04091	DENN/MADD domain containing 2Da [Source:ZFIN;Acc:ZDB-GENE-061013-542]	46	46	protein_coding	FALSE	TRUE
ENSDARG00000071001	NUGGC..1.to.many.	8.0855	2.00114	0.155972	si:dkeyp-85e10.1 [Source:ZFIN;Acc:ZDB-GENE-050208-148]	12	12	protein_coding	FALSE	FALSE
ENSDARG00000003681	eif5	8.0551	1.9018	0	eukaryotic translation initiation factor 5 [Source:ZFIN;Acc:ZDB-GENE-030131-975]	76	75	protein_coding	FALSE	FALSE
ENSDARG00000028748	tm9sf3	8.0551	2.36222	0.763415	transmembrane 9 superfamily member 3 [Source:ZFIN;Acc:ZDB-GENE-040426-2714]	91	92	protein_coding	TRUE	TRUE
ENSDARG00000034173	prkcq	8.0551	1.62559	0	protein kinase C, theta [Source:ZFIN;Acc:ZDB-GENE-041210-195]	73	73	protein_coding	FALSE	FALSE
ENSDARG00000036942	gpd1c	8.0551	1.77582	0	glycerol-3-phosphate dehydrogenase 1c [Source:ZFIN;Acc:ZDB-GENE-040426-2576]	0	0	protein_coding	FALSE	FALSE
ENSDARG00000053129	carhsp1	8.0551	2.68031	1.18965	calcium regulated heat stable protein 1 [Source:ZFIN;Acc:ZDB-GENE-040426-1479]	67	67	protein_coding	FALSE	FALSE
ENSDARG00000103716	si.busm1.48c11.3	8.0551	3.57554	2.19977	si:busm1-48c11.3 [Source:ZFIN;Acc:ZDB-GENE-030616-505]	31	28	protein_coding	TRUE	TRUE
ENSDARG00000104118	antxr2a	8.0551	2.48571	0.931124	anthrax toxin receptor 2a [Source:ZFIN;Acc:ZDB-GENE-060526-14]	57	59	protein_coding	TRUE	TRUE
ENSDARG00000014181	foxp1b	8.0247	4.12317	2.77747	forkhead box P1b [Source:ZFIN;Acc:ZDB-GENE-041203-1]	75	73	protein_coding	FALSE	FALSE
ENSDARG00000076836	gpx4b	8.0247	2.17354	0.476087	glutathione peroxidase 4b [Source:ZFIN;Acc:ZDB-GENE-030410-3]	77	77	protein_coding	FALSE	FALSE
ENSDARG00000077353	rerea	8.0247	3.71929	2.35362	arginine-glutamic acid dipeptide (RE) repeats a [Source:ZFIN;Acc:ZDB-GENE-060718-1]	77	77	protein_coding	FALSE	FALSE
ENSDARG00000105293	srsf4	8.0247	2.89135	1.44654	serine/arginine-rich splicing factor 4 [Source:ZFIN;Acc:ZDB-GENE-030131-591]	67	69	protein_coding	TRUE	FALSE
ENSDARG00000006225	ddx39aa	7.99431	2.78492	1.31813	DEAD (Asp-Glu-Ala-Asp) box polypeptide 39Aa [Source:ZFIN;Acc:ZDB-GENE-030131-4275]	93	91	protein_coding	FALSE	FALSE
ENSDARG00000031343	rab6bb	7.99431	3.68674	2.32362	RAB6B, member RAS oncogene family b [Source:ZFIN;Acc:ZDB-GENE-050320-28]	90	90	protein_coding	FALSE	FALSE
ENSDARG00000060626	dgkaa	7.99431	2.48603	0.93116	diacylglycerol kinase, alpha a [Source:ZFIN;Acc:ZDB-GENE-060616-305]	58	62	protein_coding	FALSE	FALSE
ENSDARG00000061759	kdm6a	7.99431	2.25021	0.5952	lysine (K)-specific demethylase 6A [Source:ZFIN;Acc:ZDB-GENE-081105-56]	57	70	protein_coding	FALSE	FALSE
ENSDARG00000070686	cdipt	7.99431	3.55644	2.18143	CDP-diacylglycerol--inositol 3-phosphatidyltransferase (phosphatidylinositol synthase) [Source:ZFIN;Acc:ZDB-GENE-040426-2536]	71	69	protein_coding	TRUE	FALSE
ENSDARG00000071414	zgc.91940	7.99431	1.91323	0	zgc:91940 [Source:ZFIN;Acc:ZDB-GENE-040718-418]	55	55	protein_coding	TRUE	FALSE
ENSDARG00000002293	si.ch211.197g15.9	7.96391	4.1624	2.8161	si:ch211-197g15.9 [Source:ZFIN;Acc:ZDB-GENE-050208-616]	0	0	protein_coding	FALSE	FALSE
ENSDARG00000016156	fam53b	7.96391	3.12343	1.71665	family with sequence similarity 53, member B [Source:ZFIN;Acc:ZDB-GENE-040426-2495]	42	42	protein_coding	FALSE	FALSE
ENSDARG00000056206	camk2g2	7.96391	2.80253	1.34114	calcium/calmodulin-dependent protein kinase (CaM kinase) II gamma 2 [Source:ZFIN;Acc:ZDB-GENE-070323-2]	75	75	protein_coding	FALSE	FALSE
ENSDARG00000058328	lsm7	7.96391	3.45483	2.07153	LSM7 homolog, U6 small nuclear RNA and mRNA degradation associated [Source:ZFIN;Acc:ZDB-GENE-030131-8284]	93	95	protein_coding	FALSE	FALSE
ENSDARG00000058839	SUSD1	7.96391	4.19188	2.8434	si:ch73-247j11.2 [Source:ZFIN;Acc:ZDB-GENE-141219-16]	25	26	protein_coding	TRUE	FALSE
ENSDARG00000008310	ip6k2a	7.93351	2.00067	0.155393	inositol hexakisphosphate kinase 2a [Source:ZFIN;Acc:ZDB-GENE-030131-760]	57	56	protein_coding	FALSE	FALSE
ENSDARG00000021163	thrb	7.93351	1.51731	0	thyroid hormone receptor beta [Source:ZFIN;Acc:ZDB-GENE-990415-268]	74	71	protein_coding	FALSE	TRUE
ENSDARG00000060016	nsd1a	7.93351	1.52624	0	nuclear receptor binding SET domain protein 1a [Source:ZFIN;Acc:ZDB-GENE-080519-3]	0	0	protein_coding	FALSE	FALSE
ENSDARG00000022303	higd1a	7.90312	1.91567	0	HIG1 hypoxia inducible domain family, member 1A [Source:ZFIN;Acc:ZDB-GENE-030826-15]	60	62	protein_coding	TRUE	FALSE
ENSDARG00000026519	ralgps2	7.90312	3.20261	1.79891	Ral GEF with PH domain and SH3 binding motif 2 [Source:ZFIN;Acc:ZDB-GENE-040426-1212]	83	83	protein_coding	FALSE	FALSE
ENSDARG00000032175	puf60a	7.90312	2.55555	1.02518	poly-U binding splicing factor a [Source:ZFIN;Acc:ZDB-GENE-030131-2891]	84	84	protein_coding	FALSE	FALSE
ENSDARG00000035596	ISCU..1.to.many.	7.90312	2.55316	1.02188	si:ch211-191d15.2 [Source:ZFIN;Acc:ZDB-GENE-040724-113]	78	78	protein_coding	FALSE	FALSE
ENSDARG00000044457	gfi1ab	7.90312	4.19325	2.8434	growth factor independent 1A transcription repressor b [Source:ZFIN;Acc:ZDB-GENE-040116-8]	61	62	protein_coding	FALSE	FALSE
ENSDARG00000044625	pcf11	7.90312	2.30742	0.682887	PCF11 cleavage and polyadenylation factor subunit [Source:ZFIN;Acc:ZDB-GENE-041114-175]	45	45	protein_coding	FALSE	FALSE
ENSDARG00000075963	mhc1uba	7.90312	2.93037	1.48991	major histocompatibility complex class I UBA [Source:ZFIN;Acc:ZDB-GENE-990415-145]	0	0	protein_coding	TRUE	TRUE
ENSDARG00000077264	wdr43	7.90312	3.00276	1.57926	WD repeat domain 43 [Source:ZFIN;Acc:ZDB-GENE-021231-3]	56	57	protein_coding	FALSE	FALSE
ENSDARG00000092106	si.ch211.214p13.8	7.90312	5.50168	4.31594	si:ch211-214p13.8 [Source:ZFIN;Acc:ZDB-GENE-060503-120]	0	0	protein_coding	TRUE	TRUE
ENSDARG00000098391	psmg3	7.90312	2.90346	1.45795	proteasome (prosome, macropain) assembly chaperone 3 [Source:ZFIN;Acc:ZDB-GENE-040718-262]	53	52	protein_coding	FALSE	FALSE
ENSDARG00000025858	GOLM1	7.87272	2.0749	0.299144	zgc:56525 [Source:ZFIN;Acc:ZDB-GENE-040426-1060]	22	22	protein_coding	TRUE	FALSE
ENSDARG00000052304	uqcrc1	7.87272	2.11364	0.366245	ubiquinol-cytochrome c reductase core protein I [Source:ZFIN;Acc:ZDB-GENE-040426-1792]	57	58	protein_coding	FALSE	FALSE
ENSDARG00000054539	LRP10	7.87272	1.93837	0.0310837	LDL receptor related protein 10 [Source:HGNC Symbol;Acc:HGNC:14553]	34	34	protein_coding	TRUE	TRUE
ENSDARG00000055080	rbm4.2	7.87272	2.43413	0.860945	RNA binding motif protein 4.2 [Source:ZFIN;Acc:ZDB-GENE-030131-3019]	45	45	protein_coding	FALSE	FALSE
ENSDARG00000056639	rltpr	7.87272	5.80714	4.65832	RGD motif, leucine rich repeats, tropomodulin domain and proline-rich containing [Source:ZFIN;Acc:ZDB-GENE-050419-197]	12	30	protein_coding	FALSE	FALSE
ENSDARG00000079133	si.dkey.10c21.1	7.87272	2.28004	0.640647	si:dkey-10c21.1 [Source:ZFIN;Acc:ZDB-GENE-081104-302]	0	0	protein_coding	FALSE	FALSE
ENSDARG00000097691	kiaa0101	7.87272	4.8873	3.6071	KIAA0101 [Source:ZFIN;Acc:ZDB-GENE-131127-543]	0	0	protein_coding	FALSE	FALSE
ENSDARG00000099214	h2afvb	7.87272	1.90718	0	H2A histone family, member Vb [Source:ZFIN;Acc:ZDB-GENE-050506-24]	98	98	protein_coding	FALSE	FALSE
ENSDARG00000010481	bzw1a	7.84232	2.53109	0.990629	basic leucine zipper and W2 domains 1a [Source:ZFIN;Acc:ZDB-GENE-030131-3951]	86	86	protein_coding	FALSE	FALSE
ENSDARG00000031108	lrba	7.84232	3.43955	2.06246	LPS-responsive vesicle trafficking, beach and anchor containing [Source:ZFIN;Acc:ZDB-GENE-090311-19]	70	70	protein_coding	FALSE	FALSE
ENSDARG00000038056	fgfbp2b	7.84232	2.9351	1.49402	fibroblast growth factor binding protein 2b [Source:ZFIN;Acc:ZDB-GENE-070410-95]	0	24	protein_coding	FALSE	FALSE
ENSDARG00000056803	ap1s1	7.84232	2.50306	0.952042	adaptor-related protein complex 1, sigma 1 subunit [Source:ZFIN;Acc:ZDB-GENE-040426-1119]	92	92	protein_coding	FALSE	FALSE
ENSDARG00000009106	serinc1	7.81193	2.93813	1.49789	serine incorporator 1 [Source:ZFIN;Acc:ZDB-GENE-030131-4415]	77	78	protein_coding	TRUE	TRUE
ENSDARG00000029621	sgms1	7.81193	3.80027	2.43775	sphingomyelin synthase 1 [Source:ZFIN;Acc:ZDB-GENE-061103-295]	68	67	protein_coding	TRUE	FALSE
ENSDARG00000029866	slc6a14	7.81193	2.20868	0.533629	solute carrier family 6 (amino acid transporter), member 14 [Source:ZFIN;Acc:ZDB-GENE-130411-2]	63	62	protein_coding	TRUE	FALSE
ENSDARG00000075709	ndufb3	7.81193	2.57185	1.04726	NADH dehydrogenase (ubiquinone) 1 beta subcomplex, 3 [Source:EntrezGene;Acc:100332034]	62	61	protein_coding	FALSE	FALSE
ENSDARG00000018902	pes	7.78153	2.37709	0.783243	pescadillo [Source:ZFIN;Acc:ZDB-GENE-990415-206]	71	73	protein_coding	FALSE	FALSE
ENSDARG00000030608	rhogd	7.78153	3.27831	1.88386	ras homolog gene family, member Gd [Source:ZFIN;Acc:ZDB-GENE-040426-1504]	0	0	protein_coding	FALSE	FALSE
ENSDARG00000035558	gps2	7.78153	4.60644	3.29788	G protein pathway suppressor 2 [Source:ZFIN;Acc:ZDB-GENE-040426-1176]	55	56	protein_coding	FALSE	FALSE
ENSDARG00000045399	cct5	7.78153	1.68713	0	chaperonin containing TCP1, subunit 5 (epsilon) [Source:ZFIN;Acc:ZDB-GENE-030131-977]	87	87	protein_coding	FALSE	FALSE
ENSDARG00000062909	furina	7.78153	3.07285	1.66039	furin (paired basic amino acid cleaving enzyme) a [Source:ZFIN;Acc:ZDB-GENE-040901-1]	63	64	protein_coding	TRUE	TRUE
ENSDARG00000068822	purba	7.78153	2.42148	0.84064	purine-rich element binding protein Ba [Source:ZFIN;Acc:ZDB-GENE-060531-100]	80	78	protein_coding	FALSE	FALSE
ENSDARG00000071031	snx1a	7.78153	2.6574	1.1632	sorting nexin 1a [Source:ZFIN;Acc:ZDB-GENE-060302-3]	55	54	protein_coding	FALSE	FALSE
ENSDARG00000096166	si.dkey.29p23.2	7.78153	3.46948	2.0898	si:dkey-29p23.2 [Source:ZFIN;Acc:ZDB-GENE-110914-51]	39	45	protein_coding	FALSE	FALSE
ENSDARG00000012234	psme3	7.75113	3.45258	2.06946	proteasome activator subunit 3 [Source:ZFIN;Acc:ZDB-GENE-991110-19]	73	73	protein_coding	FALSE	FALSE
ENSDARG00000016213	BX088711.1	7.75113	2.86666	1.41819		0	0	protein_coding	FALSE	FALSE
ENSDARG00000016968	tmem214	7.75113	2.15356	0.444466	transmembrane protein 214 [Source:ZFIN;Acc:ZDB-GENE-110307-2]	51	53	protein_coding	FALSE	FALSE
ENSDARG00000034823	copg2	7.75113	3.22706	1.82308	coatomer protein complex, subunit gamma 2 [Source:ZFIN;Acc:ZDB-GENE-000208-8]	87	88	protein_coding	FALSE	FALSE
ENSDARG00000038780	ubtfl	7.75113	3.20031	1.79601	upstream binding transcription factor, like [Source:ZFIN;Acc:ZDB-GENE-040426-1159]	0	0	protein_coding	FALSE	FALSE
ENSDARG00000038905	hectd3	7.75113	2.21461	0.543704	HECT domain containing 3 [Source:ZFIN;Acc:ZDB-GENE-031118-179]	69	69	protein_coding	FALSE	FALSE
ENSDARG00000040482	osbpl3b	7.75113	2.37692	0.783243	oxysterol binding protein-like 3b [Source:ZFIN;Acc:ZDB-GENE-090109-1]	63	65	protein_coding	FALSE	FALSE
ENSDARG00000045824	zgc.101783	7.75113	3.96505	2.6188	zgc:101783 [Source:ZFIN;Acc:ZDB-GENE-040912-48]	65	63	protein_coding	TRUE	FALSE
ENSDARG00000053113	ly75	7.75113	1.8942	0	lymphocyte antigen 75 [Source:ZFIN;Acc:ZDB-GENE-050309-166]	36	36	protein_coding	TRUE	TRUE
ENSDARG00000054355	dcaf7	7.75113	2.25093	0.595592	ddb1 and cul4 associated factor 7 [Source:ZFIN;Acc:ZDB-GENE-030131-9511]	98	98	protein_coding	FALSE	FALSE
ENSDARG00000055162	zhx2	7.75113	3.57378	2.19878	zinc fingers and homeoboxes 2 [Source:ZFIN;Acc:ZDB-GENE-031107-2]	44	45	protein_coding	FALSE	FALSE
ENSDARG00000061187	cbx5	7.75113	1.67747	0	chromobox homolog 5 (HP1 alpha homolog, Drosophila) [Source:ZFIN;Acc:ZDB-GENE-030131-5553]	62	62	protein_coding	FALSE	FALSE
ENSDARG00000070668	cd4.1	7.75113	5.94745	4.80675	CD4-1 molecule [Source:ZFIN;Acc:ZDB-GENE-100922-280]	0	0	protein_coding	TRUE	TRUE
ENSDARG00000076171	znf827	7.75113	4.45007	3.11534	zinc finger protein 827 [Source:ZFIN;Acc:ZDB-GENE-080728-3]	53	54	protein_coding	FALSE	FALSE
ENSDARG00000090716	cltcb	7.75113	2.81501	1.35763	clathrin, heavy chain b (Hc) [Source:ZFIN;Acc:ZDB-GENE-050227-12]	95	95	protein_coding	FALSE	FALSE
ENSDARG00000091734	tnfraf3	7.75113	5.12157	3.88664	TRAF3 interacting protein 2-like [Source:ZFIN;Acc:ZDB-GENE-110919-1]	28	29	protein_coding	FALSE	FALSE
ENSDARG00000096711	si.ch211.194k22.8	7.75113	2.44303	0.871287	si:ch211-194k22.8 [Source:ZFIN;Acc:ZDB-GENE-030131-1820]	0	0	protein_coding	FALSE	FALSE
ENSDARG00000097615	si.ch211.108d22.2	7.75113	2.24018	0.580034	si:ch211-108d22.2 [Source:ZFIN;Acc:ZDB-GENE-131127-97]	0	0	protein_coding	FALSE	FALSE
ENSDARG00000098654	RFTN1..1.to.many.	7.75113	2.46144	0.895415	raftlin, lipid raft linker 1 [Source:HGNC Symbol;Acc:HGNC:30278]	27	28	protein_coding	FALSE	FALSE
ENSDARG00000099455	ogt.2	7.75113	2.68043	1.18965	O-linked N-acetylglucosamine (GlcNAc) transferase, tandem duplicate 2 [Source:ZFIN;Acc:ZDB-GENE-051128-1]	85	85	protein_coding	FALSE	FALSE
ENSDARG00000101074	glud1b	7.75113	1.67883	0	glutamate dehydrogenase 1b [Source:ZFIN;Acc:ZDB-GENE-030828-1]	0	0	protein_coding	FALSE	FALSE
ENSDARG00000101457	cdc42ep4a	7.75113	2.42553	0.846305	CDC42 effector protein (Rho GTPase binding) 4a [Source:ZFIN;Acc:ZDB-GENE-040704-22]	39	40	protein_coding	FALSE	FALSE
ENSDARG00000003527	mak16	7.72074	3.16763	1.7627	MAK16 homolog (S. cerevisiae) [Source:ZFIN;Acc:ZDB-GENE-020419-35]	76	74	protein_coding	FALSE	FALSE
ENSDARG00000009208	prkcda	7.72074	1.84197	0	protein kinase C, delta a [Source:ZFIN;Acc:ZDB-GENE-030131-6503]	76	76	protein_coding	FALSE	FALSE
ENSDARG00000010194	eif4bb	7.72074	2.6254	1.1196	eukaryotic translation initiation factor 4Bb [Source:ZFIN;Acc:ZDB-GENE-030131-8563]	54	55	protein_coding	FALSE	FALSE
ENSDARG00000017659	sps2	7.72074	2.80367	1.34249	selenophosphate synthetase 2 [Source:ZFIN;Acc:ZDB-GENE-030327-5]	79	78	protein_coding	FALSE	FALSE
ENSDARG00000025269	pdcd6ip	7.72074	2.5018	0.95197	programmed cell death 6 interacting protein [Source:ZFIN;Acc:ZDB-GENE-040426-2678]	72	73	protein_coding	FALSE	FALSE
ENSDARG00000026611	socs3b	7.72074	4.39848	3.05984	suppressor of cytokine signaling 3b [Source:ZFIN;Acc:ZDB-GENE-040426-2528]	62	62	protein_coding	FALSE	FALSE
ENSDARG00000039399	nt5c2a	7.72074	3.86296	2.50165	5'-nucleotidase, cytosolic IIa [Source:ZFIN;Acc:ZDB-GENE-030131-3566]	88	88	protein_coding	FALSE	FALSE
ENSDARG00000041314	ndufb9	7.72074	2.03748	0.224389	NADH dehydrogenase (ubiquinone) 1 beta subcomplex, 9 [Source:ZFIN;Acc:ZDB-GENE-030131-8364]	75	78	protein_coding	FALSE	FALSE
ENSDARG00000044153	ppp1cb	7.72074	2.06815	0.286381	protein phosphatase 1, catalytic subunit, beta isozyme [Source:ZFIN;Acc:ZDB-GENE-030616-609]	96	96	protein_coding	FALSE	FALSE
ENSDARG00000045421	stard3nl	7.72074	3.12781	1.72112	STARD3 N-terminal like [Source:ZFIN;Acc:ZDB-GENE-040718-4]	66	68	protein_coding	TRUE	FALSE
ENSDARG00000045847	si.ch211.214j24.10	7.72074	2.94592	1.50876	si:ch211-214j24.10 [Source:ZFIN;Acc:ZDB-GENE-030131-6301]	0	0	protein_coding	FALSE	FALSE
ENSDARG00000045914	si.ch211.51e12.7	7.72074	3.61112	2.23889	si:ch211-51e12.7 [Source:ZFIN;Acc:ZDB-GENE-030131-8279]	0	0	protein_coding	FALSE	FALSE
ENSDARG00000057234	chtopa	7.72074	1.77935	0	chromatin target of PRMT1a [Source:ZFIN;Acc:ZDB-GENE-030131-210]	65	74	protein_coding	FALSE	FALSE
ENSDARG00000069175	vps4b	7.72074	2.00137	0.155972	vacuolar protein sorting 4b homolog B (S. cerevisiae) [Source:ZFIN;Acc:ZDB-GENE-040426-1235]	0	0	protein_coding	FALSE	FALSE
ENSDARG00000069853	txndc9	7.72074	4.19758	2.84495	thioredoxin domain containing 9 [Source:ZFIN;Acc:ZDB-GENE-030131-8569]	73	74	protein_coding	FALSE	FALSE
ENSDARG00000070256	suz12a	7.72074	4.61234	3.30166	SUZ12 polycomb repressive complex 2a subunit [Source:ZFIN;Acc:ZDB-GENE-040801-36]	72	73	protein_coding	FALSE	FALSE
ENSDARG00000074688	fbrs	7.72074	1.5886	0	fibrosin [Source:ZFIN;Acc:ZDB-GENE-111207-1]	15	14	protein_coding	FALSE	FALSE
ENSDARG00000102833	si.ch211.10h13.2	7.72074	4.72355	3.41345	si:ch211-10h13.2 [Source:ZFIN;Acc:ZDB-GENE-070912-14]	0	0	lincRNA	NA	NA
ENSDARG00000103553	sf3b3	7.72074	3.69966	2.33746	splicing factor 3b, subunit 3 [Source:ZFIN;Acc:ZDB-GENE-040426-2901]	93	93	protein_coding	FALSE	FALSE
ENSDARG00000004160	reep3b	7.69034	3.23179	1.8267	receptor accessory protein 3b [Source:ZFIN;Acc:ZDB-GENE-040426-730]	68	67	protein_coding	TRUE	FALSE
ENSDARG00000010784	ppp1r12a	7.69034	3.64858	2.27872	protein phosphatase 1, regulatory subunit 12A [Source:ZFIN;Acc:ZDB-GENE-041011-3]	63	67	protein_coding	TRUE	FALSE
ENSDARG00000012874	snap23.1	7.69034	2.82923	1.37602	synaptosomal-associated protein 23.1 [Source:ZFIN;Acc:ZDB-GENE-040426-883]	56	55	protein_coding	FALSE	FALSE
ENSDARG00000030154	pak7	7.69034	1.58036	0	p21 protein (Cdc42/Rac)-activated kinase 7 [Source:ZFIN;Acc:ZDB-GENE-040426-2085]	0	0	protein_coding	FALSE	FALSE
ENSDARG00000033440	metap1	7.69034	3.09447	1.68559	methionyl aminopeptidase 1 [Source:ZFIN;Acc:ZDB-GENE-050626-124]	83	83	protein_coding	FALSE	FALSE
ENSDARG00000044935	hpdb	7.69034	4.69973	3.39076	4-hydroxyphenylpyruvate dioxygenase b [Source:ZFIN;Acc:ZDB-GENE-040808-62]	68	70	protein_coding	FALSE	FALSE
ENSDARG00000056338	szrd1	7.69034	2.80804	1.34814	SUZ RNA binding domain containing 1 [Source:ZFIN;Acc:ZDB-GENE-050522-55]	62	64	protein_coding	FALSE	FALSE
ENSDARG00000069796	znf1124.1	7.69034	2.32347	0.707999	zinc finger protein 1124 [Source:ZFIN;Acc:ZDB-GENE-071004-105]	42	46	protein_coding	FALSE	FALSE
ENSDARG00000075086	CU681840.1	7.69034	1.74372	0		0	0	protein_coding	FALSE	FALSE
ENSDARG00000077864	rasgrp3	7.69034	1.55252	0	RAS guanyl releasing protein 3 (calcium and DAG-regulated) [Source:ZFIN;Acc:ZDB-GENE-070424-82]	71	72	protein_coding	FALSE	FALSE
ENSDARG00000088831	si.dkey.81j8.6	7.69034	3.60047	2.22637	si:dkey-81j8.6 [Source:ZFIN;Acc:ZDB-GENE-091116-12]	0	0	protein_coding	FALSE	FALSE
ENSDARG00000007795	cst3	7.65994	2.53478	0.995102	cystatin C (amyloid angiopathy and cerebral hemorrhage) [Source:ZFIN;Acc:ZDB-GENE-030131-373]	27	31	protein_coding	TRUE	TRUE
ENSDARG00000008551	pole3	7.65994	2.19596	0.510236	polymerase (DNA directed), epsilon 3 (p17 subunit) [Source:ZFIN;Acc:ZDB-GENE-040426-1773]	73	75	protein_coding	FALSE	FALSE
ENSDARG00000011462	otub1b	7.65994	3.2583	1.85983	OTU deubiquitinase, ubiquitin aldehyde binding 1b [Source:ZFIN;Acc:ZDB-GENE-040718-204]	79	78	protein_coding	FALSE	FALSE
ENSDARG00000016484	dkc1	7.65994	3.47542	2.09382	dyskeratosis congenita 1, dyskerin [Source:ZFIN;Acc:ZDB-GENE-031118-120]	75	77	protein_coding	FALSE	FALSE
ENSDARG00000031100	ivns1abpa	7.65994	3.15537	1.74902	influenza virus NS1A binding protein a [Source:ZFIN;Acc:ZDB-GENE-031222-2]	77	78	protein_coding	FALSE	FALSE
ENSDARG00000035556	rps6ka3a	7.65994	2.17718	0.481308	ribosomal protein S6 kinase a, polypeptide 3a [Source:ZFIN;Acc:ZDB-GENE-030219-119]	86	86	protein_coding	FALSE	FALSE
ENSDARG00000041878	rab11ba	7.65994	2.39659	0.809672	RAB11B, member RAS oncogene family, a [Source:ZFIN;Acc:ZDB-GENE-040426-2860]	0	0	protein_coding	FALSE	FALSE
ENSDARG00000056490	SSBP4..1.to.many.	7.65994	3.15242	1.74715	zgc:110158 [Source:ZFIN;Acc:ZDB-GENE-050522-195]	71	78	protein_coding	FALSE	FALSE
ENSDARG00000071203	sptssa	7.65994	3.39849	2.02287	serine palmitoyltransferase, small subunit A [Source:ZFIN;Acc:ZDB-GENE-050320-26]	84	82	protein_coding	TRUE	FALSE
ENSDARG00000077776	csnk2b	7.65994	1.90724	0	casein kinase 2, beta polypeptide [Source:ZFIN;Acc:ZDB-GENE-990415-29]	99	99	protein_coding	FALSE	FALSE
ENSDARG00000092407	TRIM35..1.to.many..2	7.65994	1.68356	0	tripartite motif containing 35 [Source:HGNC Symbol;Acc:HGNC:16285]	30	32	protein_coding	FALSE	FALSE
ENSDARG00000100284	CABZ01080372.1	7.65994	4.36173	3.02018		0	0	protein_coding	FALSE	FALSE
ENSDARG00000101992	si.dkey.238k10.3	7.65994	1.82867	0	si:dkey-238k10.3 [Source:ZFIN;Acc:ZDB-GENE-070705-401]	0	0	protein_coding	FALSE	FALSE
ENSDARG00000103125	TSC2	7.65994	3.78187	2.42131	tuberous sclerosis 2 [Source:HGNC Symbol;Acc:HGNC:12363]	58	60	protein_coding	FALSE	FALSE
ENSDARG00000103594	npm3	7.65994	3.44506	2.06417	nucleophosmin/nucleoplasmin, 3 [Source:ZFIN;Acc:ZDB-GENE-050320-50]	40	45	protein_coding	FALSE	FALSE
ENSDARG00000002405	si.ch211.225b11.1	7.62955	3.05311	1.64006	si:ch211-225b11.1 [Source:ZFIN;Acc:ZDB-GENE-060531-39]	0	0	protein_coding	TRUE	FALSE
ENSDARG00000005026	tshz1	7.62955	4.21025	2.86111	teashirt zinc finger homeobox 1 [Source:ZFIN;Acc:ZDB-GENE-030820-3]	65	65	protein_coding	FALSE	FALSE
ENSDARG00000011609	FOXK2	7.62955	2.70709	1.22382	si:ch211-262e15.1 [Source:ZFIN;Acc:ZDB-GENE-030131-5310]	77	77	protein_coding	FALSE	FALSE
ENSDARG00000016345	ncoa5	7.62955	1.57751	0	nuclear receptor coactivator 5 [Source:ZFIN;Acc:ZDB-GENE-040912-155]	50	51	protein_coding	FALSE	FALSE
ENSDARG00000017500	rock2a	7.62955	1.94784	0.0493493	rho-associated, coiled-coil containing protein kinase 2a [Source:ZFIN;Acc:ZDB-GENE-030115-3]	74	74	protein_coding	FALSE	FALSE
ENSDARG00000044811	cdk9	7.62955	2.18178	0.487489	cyclin-dependent kinase 9 (CDC2-related kinase) [Source:ZFIN;Acc:ZDB-GENE-030131-321]	85	85	protein_coding	FALSE	FALSE
ENSDARG00000045391	cd226	7.62955	5.23391	4.00247	CD226 molecule [Source:ZFIN;Acc:ZDB-GENE-070112-1322]	24	23	protein_coding	TRUE	TRUE
ENSDARG00000058672	NUGGC..1.to.many..7	7.62955	3.08613	1.67632	si:dkey-266f7.1 [Source:ZFIN;Acc:ZDB-GENE-061207-67]	18	18	protein_coding	FALSE	FALSE
ENSDARG00000070657	pa2g4b	7.62955	2.60224	1.09047	proliferation-associated 2G4, b [Source:ZFIN;Acc:ZDB-GENE-030131-2182]	82	82	protein_coding	FALSE	FALSE
ENSDARG00000077372	tfr1b	7.62955	2.24702	0.590561	transferrin receptor 1b [Source:ZFIN;Acc:ZDB-GENE-041220-2]	40	38	protein_coding	TRUE	FALSE
ENSDARG00000078279	foxp3b	7.62955	5.8348	4.68246	forkhead box P3b [Source:ZFIN;Acc:ZDB-GENE-081104-332]	30	30	protein_coding	FALSE	FALSE
ENSDARG00000079402	tapbp.1	7.62955	1.86198	0	TAP binding protein (tapasin), tandem duplicate 1 [Source:ZFIN;Acc:ZDB-GENE-010110-2]	28	28	protein_coding	TRUE	TRUE
ENSDARG00000079488	zgc.195282	7.62955	5.83019	4.68013	zgc:195282 [Source:ZFIN;Acc:ZDB-GENE-081022-208]	0	0	protein_coding	FALSE	FALSE
ENSDARG00000103118	cib1.1	7.62955	2.51221	0.963602	calcium and integrin binding 1 (calmyrin) [Source:ZFIN;Acc:ZDB-GENE-050417-170]	74	73	protein_coding	FALSE	FALSE
ENSDARG00000104400	socs3a	7.62955	3.17988	1.77482	suppressor of cytokine signaling 3a [Source:ZFIN;Acc:ZDB-GENE-030131-7349]	60	61	protein_coding	FALSE	FALSE
ENSDARG00000005772	tsr2	7.59915	2.72307	1.24302	TSR2, 20S rRNA accumulation, homolog (S. cerevisiae) [Source:ZFIN;Acc:ZDB-GENE-021231-2]	43	43	protein_coding	FALSE	FALSE
ENSDARG00000012340	ptpn11b	7.59915	3.72657	2.36263	protein tyrosine phosphatase, non-receptor type 11, b [Source:ZFIN;Acc:ZDB-GENE-040426-1158]	0	0	protein_coding	FALSE	FALSE
ENSDARG00000013838	sulf2b	7.59915	2.66151	1.16764	sulfatase 2b [Source:ZFIN;Acc:ZDB-GENE-030131-775]	0	0	protein_coding	TRUE	TRUE
ENSDARG00000017037	ikbkg	7.59915	1.99097	0.138535	inhibitor of kappa light polypeptide gene enhancer in B-cells, kinase gamma [Source:ZFIN;Acc:ZDB-GENE-050327-68]	31	31	protein_coding	FALSE	FALSE
ENSDARG00000022660	armc2	7.59915	2.96328	1.53165	armadillo repeat containing 2 [Source:ZFIN;Acc:ZDB-GENE-041014-7]	5	44	protein_coding	FALSE	FALSE
ENSDARG00000025332	rbm28	7.59915	1.98435	0.127046	RNA binding motif protein 28 [Source:ZFIN;Acc:ZDB-GENE-040426-960]	44	44	protein_coding	FALSE	FALSE
ENSDARG00000030839	tescb	7.59915	3.0667	1.65595	tescalcin b [Source:ZFIN;Acc:ZDB-GENE-040426-1903]	56	55	protein_coding	FALSE	FALSE
ENSDARG00000038687	nfkb2	7.59915	2.75851	1.28875	nuclear factor of kappa light polypeptide gene enhancer in B-cells 2 (p49/p100) [Source:ZFIN;Acc:ZDB-GENE-030131-6701]	48	48	protein_coding	FALSE	FALSE
ENSDARG00000057007	ctbp1	7.59915	2.60597	1.09385	C-terminal binding protein 1 [Source:ZFIN;Acc:ZDB-GENE-010130-1]	0	0	protein_coding	FALSE	FALSE
ENSDARG00000058871	FBXW12	7.59915	2.85184	1.4036	si:ch73-142c19.1 [Source:ZFIN;Acc:ZDB-GENE-090311-15]	27	28	protein_coding	FALSE	FALSE
ENSDARG00000060366	slc12a9	7.59915	2.74299	1.26789	solute carrier family 12, member 9 [Source:ZFIN;Acc:ZDB-GENE-050208-222]	58	59	protein_coding	TRUE	FALSE
ENSDARG00000060687	chd2	7.59915	1.67754	0	chromodomain helicase DNA binding protein 2 [Source:ZFIN;Acc:ZDB-GENE-050419-256]	74	74	protein_coding	FALSE	FALSE
ENSDARG00000063371	rasa3	7.59915	5.12286	3.88664	RAS p21 protein activator 3 [Source:ZFIN;Acc:ZDB-GENE-090313-21]	83	83	protein_coding	FALSE	FALSE
ENSDARG00000068993	zgc.153631	7.59915	3.78122	2.42131	zgc:153631 [Source:ZFIN;Acc:ZDB-GENE-060825-208]	21	19	protein_coding	TRUE	TRUE
ENSDARG00000070688	ncalda	7.59915	2.78628	1.31849	neurocalcin delta a [Source:ZFIN;Acc:ZDB-GENE-080220-28]	98	98	protein_coding	FALSE	FALSE
ENSDARG00000074498	chd9	7.59915	2.44805	0.876832	chromodomain helicase DNA binding protein 9 [Source:ZFIN;Acc:ZDB-GENE-030131-497]	68	69	protein_coding	FALSE	FALSE
ENSDARG00000074899	taok2a	7.59915	2.96173	1.53038	TAO kinase 2a [Source:ZFIN;Acc:ZDB-GENE-030131-9416]	56	57	protein_coding	FALSE	FALSE
ENSDARG00000075757	gig2e	7.59915	4.13919	2.788	grass carp reovirus (GCRV)-induced gene 2e [Source:ZFIN;Acc:ZDB-GENE-130517-2]	0	0	protein_coding	FALSE	FALSE
ENSDARG00000077721	knop1	7.59915	2.15107	0.440679	lysine-rich nucleolar protein 1 [Source:ZFIN;Acc:ZDB-GENE-090313-76]	23	24	protein_coding	FALSE	FALSE
ENSDARG00000078459	cux1a	7.59915	3.97269	2.62458	cut-like homeobox 1a [Source:ZFIN;Acc:ZDB-GENE-030131-5868]	61	62	protein_coding	FALSE	FALSE
ENSDARG00000086881	IER2..1.to.many.	7.59915	2.83417	1.38234	immediate early response 2 [Source:HGNC Symbol;Acc:HGNC:28871]	35	36	protein_coding	FALSE	FALSE
ENSDARG00000103980	ets2	7.59915	2.04737	0.244226	v-ets avian erythroblastosis virus E26 oncogene homolog 2 [Source:ZFIN;Acc:ZDB-GENE-050522-552]	61	60	protein_coding	FALSE	FALSE
ENSDARG00000104572	si.dkey.35h6.1	7.59915	2.38663	0.794005	si:dkey-35h6.1 [Source:ZFIN;Acc:ZDB-GENE-141216-112]	0	0	protein_coding	FALSE	FALSE
ENSDARG00000003854	acsl1b	7.56875	5.0488	3.80827	acyl-CoA synthetase long-chain family member 1b [Source:ZFIN;Acc:ZDB-GENE-040801-88]	65	66	protein_coding	FALSE	FALSE
ENSDARG00000006219	gnl3	7.56875	2.76588	1.29612	guanine nucleotide binding protein-like 3 (nucleolar) [Source:ZFIN;Acc:ZDB-GENE-030131-616]	40	43	protein_coding	FALSE	FALSE
ENSDARG00000019444	ssr4	7.56875	3.26968	1.87295	signal sequence receptor, delta [Source:ZFIN;Acc:ZDB-GENE-030131-4900]	70	70	protein_coding	TRUE	TRUE
ENSDARG00000032327	usp36	7.56875	1.82668	0	ubiquitin specific peptidase 36 [Source:ZFIN;Acc:ZDB-GENE-030131-5450]	50	52	protein_coding	FALSE	FALSE
ENSDARG00000034497	fbxl14a	7.56875	3.69372	2.33184	F-box and leucine-rich repeat protein 14a [Source:ZFIN;Acc:ZDB-GENE-030131-5920]	85	86	protein_coding	FALSE	FALSE
ENSDARG00000035914	tmem167a	7.56875	1.62006	0	transmembrane protein 167A [Source:ZFIN;Acc:ZDB-GENE-050320-29]	40	41	protein_coding	TRUE	TRUE
ENSDARG00000040713	rbbp9	7.56875	1.82776	0	retinoblastoma binding protein 9 [Source:ZFIN;Acc:ZDB-GENE-050208-692]	66	68	protein_coding	FALSE	FALSE
ENSDARG00000042725	cebpb	7.56875	1.75685	0	CCAAT/enhancer binding protein (C/EBP), beta [Source:ZFIN;Acc:ZDB-GENE-020111-3]	33	32	protein_coding	FALSE	FALSE
ENSDARG00000044295	pip5k1ba	7.56875	1.74029	0	phosphatidylinositol-4-phosphate 5-kinase, type I, beta a [Source:ZFIN;Acc:ZDB-GENE-041010-81]	66	66	protein_coding	FALSE	FALSE
ENSDARG00000045011	tapbp.2	7.56875	2.04437	0.237946	TAP binding protein (tapasin), tandem duplicate 2 [Source:ZFIN;Acc:ZDB-GENE-060503-136]	26	26	protein_coding	TRUE	TRUE
ENSDARG00000056152	fam3c	7.56875	3.33134	1.94511	family with sequence similarity 3, member C [Source:ZFIN;Acc:ZDB-GENE-030131-6137]	65	65	protein_coding	TRUE	FALSE
ENSDARG00000063229	xpo1b	7.56875	3.23553	1.83181	exportin 1 (CRM1 homolog, yeast) b [Source:ZFIN;Acc:ZDB-GENE-070530-6]	96	96	protein_coding	FALSE	FALSE
ENSDARG00000067727	BCL11B..1.to.many.	7.56875	3.59375	2.21889	B-cell CLL/lymphoma 11B (zinc finger protein) [Source:HGNC Symbol;Acc:HGNC:13222]	59	61	protein_coding	FALSE	FALSE
ENSDARG00000070600	DYRK3	7.56875	4.11505	2.77406	zgc:172180 [Source:ZFIN;Acc:ZDB-GENE-080219-31]	62	64	protein_coding	FALSE	FALSE
ENSDARG00000103063	RNH1..1.to.many..17	7.56875	2.38321	0.791233	si:dkey-156c23.1 [Source:ZFIN;Acc:ZDB-GENE-141210-8]	0	0	protein_coding	FALSE	FALSE
ENSDARG00000103146	nlrc3	7.56875	1.99056	0.138535	NLR family, CARD domain containing 3 [Source:ZFIN;Acc:ZDB-GENE-071119-1]	42	44	protein_coding	FALSE	TRUE
ENSDARG00000003952	pfn2	7.53836	2.92676	1.48661	profilin 2 [Source:ZFIN;Acc:ZDB-GENE-040115-4]	0	0	protein_coding	FALSE	FALSE
ENSDARG00000006124	kdm5c	7.53836	2.35173	0.74842	lysine (K)-specific demethylase 5C [Source:ZFIN;Acc:ZDB-GENE-060810-94]	61	61	protein_coding	FALSE	FALSE
ENSDARG00000012399	adssl	7.53836	1.5949	0	adenylosuccinate synthase, like [Source:ZFIN;Acc:ZDB-GENE-020419-28]	0	0	protein_coding	FALSE	FALSE
ENSDARG00000019000	smc3	7.53836	2.5341	0.994396	structural maintenance of chromosomes 3 [Source:ZFIN;Acc:ZDB-GENE-030131-3196]	95	95	protein_coding	FALSE	FALSE
ENSDARG00000020521	exoc6	7.53836	2.75855	1.28875	exocyst complex component 6 [Source:ZFIN;Acc:ZDB-GENE-040426-2511]	84	85	protein_coding	FALSE	FALSE
ENSDARG00000023303	zgc.66427	7.53836	3.41207	2.03618	zgc:66427 [Source:ZFIN;Acc:ZDB-GENE-040426-1913]	0	0	protein_coding	FALSE	FALSE
ENSDARG00000032013	pafah1b1a	7.53836	3.00859	1.58503	platelet-activating factor acetylhydrolase 1b, regulatory subunit 1a [Source:ZFIN;Acc:ZDB-GENE-040116-2]	95	94	protein_coding	FALSE	FALSE
ENSDARG00000035986	ptpn2b	7.53836	1.97187	0.102563	protein tyrosine phosphatase, non-receptor type 2, b [Source:ZFIN;Acc:ZDB-GENE-030909-8]	62	62	protein_coding	FALSE	FALSE
ENSDARG00000036754	hmgn3	7.53836	2.19636	0.510236	high mobility group nucleosomal binding domain 3 [Source:ZFIN;Acc:ZDB-GENE-041114-180]	47	59	protein_coding	FALSE	FALSE
ENSDARG00000040443	polr2i	7.53836	3.83298	2.46902	polymerase (RNA) II (DNA directed) polypeptide I [Source:ZFIN;Acc:ZDB-GENE-041010-106]	93	93	protein_coding	FALSE	FALSE
ENSDARG00000042853	ivd	7.53836	2.96284	1.53157	isovaleryl-CoA dehydrogenase [Source:ZFIN;Acc:ZDB-GENE-030616-262]	73	74	protein_coding	FALSE	TRUE
ENSDARG00000042927	mapre1a	7.53836	1.78322	0	microtubule-associated protein, RP/EB family, member 1a [Source:ZFIN;Acc:ZDB-GENE-030131-6067]	68	68	protein_coding	FALSE	FALSE
ENSDARG00000043448	itm2ca	7.53836	1.70851	0	integral membrane protein 2Ca [Source:ZFIN;Acc:ZDB-GENE-040718-284]	59	59	protein_coding	TRUE	FALSE
ENSDARG00000054362	ccdc47	7.53836	2.85342	1.40389	coiled-coil domain containing 47 [Source:ZFIN;Acc:ZDB-GENE-040912-15]	78	77	protein_coding	FALSE	TRUE
ENSDARG00000055857	dopey2	7.53836	3.44047	2.06246	dopey family member 2 [Source:ZFIN;Acc:ZDB-GENE-040426-1195]	54	55	protein_coding	FALSE	FALSE
ENSDARG00000056235	smndc1	7.53836	1.89963	0	survival motor neuron domain containing 1 [Source:ZFIN;Acc:ZDB-GENE-030131-614]	78	78	protein_coding	FALSE	FALSE
ENSDARG00000056378	ifi30	7.53836	2.01229	0.1759	interferon, gamma-inducible protein 30 [Source:ZFIN;Acc:ZDB-GENE-030131-8447]	40	37	protein_coding	FALSE	TRUE
ENSDARG00000056414	usp1	7.53836	3.03614	1.61791	ubiquitin specific peptidase 1 [Source:ZFIN;Acc:ZDB-GENE-030131-726]	49	50	protein_coding	FALSE	FALSE
ENSDARG00000057299	pbdc1	7.53836	2.34253	0.735076	polysaccharide biosynthesis domain containing 1 [Source:ZFIN;Acc:ZDB-GENE-040718-459]	60	61	protein_coding	FALSE	FALSE
ENSDARG00000075593	trim71	7.53836	3.58355	2.20658	tripartite motif containing 71, E3 ubiquitin protein ligase [Source:ZFIN;Acc:ZDB-GENE-040128-1]	75	76	protein_coding	FALSE	FALSE
ENSDARG00000079315	LPXN	7.53836	3.66143	2.29345	si:rp71-15d4.1 [Source:ZFIN;Acc:ZDB-GENE-081105-159]	44	44	protein_coding	FALSE	FALSE
ENSDARG00000094097	si.ch211.209a2.1	7.53836	4.26569	2.92543	si:ch211-209a2.1 [Source:ZFIN;Acc:ZDB-GENE-060531-32]	0	0	processed_transcript	NA	NA
ENSDARG00000095830	serpinb1l1	7.53836	1.65682	0	serpin peptidase inhibitor, clade B (ovalbumin), member 1, like 1 [Source:ZFIN;Acc:ZDB-GENE-040715-5]	0	0	protein_coding	FALSE	FALSE
ENSDARG00000099417	CT027611.1	7.53836	2.68402	1.19305		0	0	protein_coding	FALSE	FALSE
ENSDARG00000102471	TRAK2	7.53836	4.34201	3.00018	trafficking protein, kinesin binding 2 [Source:HGNC Symbol;Acc:HGNC:13206]	47	47	protein_coding	FALSE	FALSE
ENSDARG00000003113	ada	7.50796	2.74669	1.27298	adenosine deaminase [Source:ZFIN;Acc:ZDB-GENE-040718-393]	64	65	protein_coding	FALSE	FALSE
ENSDARG00000004173	copa	7.50796	2.00884	0.168876	coatomer protein complex, subunit alpha [Source:ZFIN;Acc:ZDB-GENE-020905-2]	85	85	protein_coding	FALSE	FALSE
ENSDARG00000005191	ahcy	7.50796	1.93659	0.0279707	adenosylhomocysteinase [Source:ZFIN;Acc:ZDB-GENE-031219-6]	86	86	protein_coding	FALSE	FALSE
ENSDARG00000010553	mmgt1	7.50796	1.91469	0	membrane magnesium transporter 1 [Source:ZFIN;Acc:ZDB-GENE-040801-65]	56	78	protein_coding	TRUE	TRUE
ENSDARG00000010571	ezh2	7.50796	4.12934	2.78319	enhancer of zeste 2 polycomb repressive complex 2 subunit [Source:ZFIN;Acc:ZDB-GENE-041111-259]	84	85	protein_coding	FALSE	FALSE
ENSDARG00000012005	mob2b	7.50796	2.46952	0.908721	MOB kinase activator 2b [Source:ZFIN;Acc:ZDB-GENE-060616-319]	67	74	protein_coding	FALSE	FALSE
ENSDARG00000012672	gtf2e2	7.50796	2.08211	0.312345	general transcription factor IIE, polypeptide 2, beta [Source:ZFIN;Acc:ZDB-GENE-030131-6794]	79	79	protein_coding	FALSE	FALSE
ENSDARG00000017886	zbtb11	7.50796	2.63019	1.12611	zinc finger and BTB domain containing 11 [Source:ZFIN;Acc:ZDB-GENE-030131-5055]	51	51	protein_coding	FALSE	FALSE
ENSDARG00000021677	phf11	7.50796	2.90856	1.46328	PHD finger protein 11 [Source:ZFIN;Acc:ZDB-GENE-081104-417]	12	14	protein_coding	FALSE	FALSE
ENSDARG00000032430	ppp2r1b	7.50796	2.00885	0.168876	protein phosphatase 2, regulatory subunit A, beta [Source:ZFIN;Acc:ZDB-GENE-040927-20]	88	88	protein_coding	FALSE	FALSE
ENSDARG00000033855	rqcd1	7.50796	3.33383	1.94567	RCD1 required for cell differentiation1 homolog (S. pombe) [Source:ZFIN;Acc:ZDB-GENE-030131-1558]	96	96	protein_coding	FALSE	FALSE
ENSDARG00000038075	cyc1	7.50796	2.54876	1.01602	cytochrome c-1 [Source:ZFIN;Acc:ZDB-GENE-031105-2]	73	72	protein_coding	FALSE	FALSE
ENSDARG00000043976	etf1b	7.50796	1.87092	0	eukaryotic translation termination factor 1b [Source:ZFIN;Acc:ZDB-GENE-021029-1]	96	96	protein_coding	FALSE	FALSE
ENSDARG00000060030	setd1a	7.50796	3.28401	1.88984	SET domain containing 1A [Source:ZFIN;Acc:ZDB-GENE-080521-4]	40	40	protein_coding	FALSE	FALSE
ENSDARG00000070623	med10	7.50796	2.35741	0.756571	mediator complex subunit 10 [Source:ZFIN;Acc:ZDB-GENE-070117-2423]	84	85	protein_coding	FALSE	FALSE
ENSDARG00000071691	uqcrc2b	7.50796	3.06145	1.65016	ubiquinol-cytochrome c reductase core protein IIb [Source:ZFIN;Acc:ZDB-GENE-030131-1269]	58	61	protein_coding	FALSE	FALSE
ENSDARG00000075543	chd8	7.50796	2.9332	1.49281	chromodomain helicase DNA binding protein 8 [Source:ZFIN;Acc:ZDB-GENE-030131-6320]	57	57	protein_coding	FALSE	FALSE
ENSDARG00000092394	dcun1d4	7.50796	2.90664	1.46253	DCN1, defective in cullin neddylation 1, domain containing 4 (S. cerevisiae) [Source:ZFIN;Acc:ZDB-GENE-041014-248]	77	78	protein_coding	FALSE	FALSE
ENSDARG00000096527	si.dkey.18j14.5	7.50796	3.73562	2.37112	si:dkey-18j14.5 [Source:ZFIN;Acc:ZDB-GENE-121214-285]	0	0	lincRNA	NA	NA
ENSDARG00000097414	si.ch211.106e7.2	7.50796	1.76554	0	si:ch211-106e7.2 [Source:ZFIN;Acc:ZDB-GENE-031116-72]	0	0	protein_coding	FALSE	FALSE
ENSDARG00000098813	stx12	7.50796	3.70817	2.34056	syntaxin 12 [Source:ZFIN;Acc:ZDB-GENE-040625-11]	68	69	protein_coding	TRUE	FALSE
ENSDARG00000103203	vps28	7.50796	3.05866	1.64701	vacuolar protein sorting 28 (yeast) [Source:ZFIN;Acc:ZDB-GENE-040426-1527]	0	72	protein_coding	FALSE	FALSE
ENSDARG00000104470	syngr2b	7.50796	4.7149	3.40651	synaptogyrin 2b [Source:ZFIN;Acc:ZDB-GENE-070424-19]	48	49	protein_coding	TRUE	FALSE
ENSDARG00000005350	dip2ba	7.47756	2.50503	0.955167	disco-interacting protein 2 homolog Ba [Source:ZFIN;Acc:ZDB-GENE-040426-2305]	80	80	protein_coding	FALSE	FALSE
ENSDARG00000005840	got2b	7.47756	2.82755	1.37413	glutamic-oxaloacetic transaminase 2b, mitochondrial [Source:ZFIN;Acc:ZDB-GENE-030131-7917]	78	77	protein_coding	FALSE	FALSE
ENSDARG00000008370	csnk1da	7.47756	2.49928	0.948342	casein kinase 1, delta a [Source:ZFIN;Acc:ZDB-GENE-030131-825]	92	92	protein_coding	FALSE	FALSE
ENSDARG00000009830	hdlbpa	7.47756	1.8354	0	high density lipoprotein binding protein a [Source:ZFIN;Acc:ZDB-GENE-030131-2032]	41	79	protein_coding	FALSE	FALSE
ENSDARG00000012432	fam76b	7.47756	3.05519	1.64276	family with sequence similarity 76, member B [Source:ZFIN;Acc:ZDB-GENE-030131-6955]	89	89	protein_coding	FALSE	FALSE
ENSDARG00000012723	rbm14a	7.47756	1.52545	0	RNA binding motif protein 14a [Source:ZFIN;Acc:ZDB-GENE-050522-496]	23	23	protein_coding	FALSE	FALSE
ENSDARG00000039162	rhebl1	7.47756	2.40617	0.817935	Ras homolog enriched in brain like 1 [Source:ZFIN;Acc:ZDB-GENE-000510-1]	0	0	protein_coding	FALSE	FALSE
ENSDARG00000040121	psma2	7.47756	1.80576	0	proteasome subunit alpha 2 [Source:ZFIN;Acc:ZDB-GENE-050522-479]	95	95	protein_coding	FALSE	FALSE
ENSDARG00000041776	ndst3	7.47756	5.37029	4.16199	N-deacetylase/N-sulfotransferase (heparan glucosaminyl) 3 [Source:ZFIN;Acc:ZDB-GENE-090312-199]	77	76	protein_coding	TRUE	FALSE
ENSDARG00000043732	cops4	7.47756	1.78364	0	COP9 constitutive photomorphogenic homolog subunit 4 (Arabidopsis) [Source:ZFIN;Acc:ZDB-GENE-030131-4317]	95	95	protein_coding	FALSE	FALSE
ENSDARG00000053666	myb	7.47756	6.70416	5.64337	v-myb avian myeloblastosis viral oncogene homolog [Source:ZFIN;Acc:ZDB-GENE-991110-14]	53	56	protein_coding	FALSE	FALSE
ENSDARG00000055560	p2ry8	7.47756	5.94033	4.80153	purinergic receptor P2Y, G-protein coupled, 8 [Source:ZFIN;Acc:ZDB-GENE-070912-447]	0	50	protein_coding	TRUE	FALSE
ENSDARG00000056638	pir	7.47756	2.53827	0.999897	pirin [Source:ZFIN;Acc:ZDB-GENE-040718-288]	69	70	protein_coding	FALSE	FALSE
ENSDARG00000060010	iqgap2	7.47756	3.4388	2.06246	IQ motif containing GTPase activating protein 2 [Source:ZFIN;Acc:ZDB-GENE-030131-2878]	61	61	protein_coding	FALSE	FALSE
ENSDARG00000062558	rspry1	7.47756	2.8468	1.39701	ring finger and SPRY domain containing 1 [Source:ZFIN;Acc:ZDB-GENE-061026-2]	77	77	protein_coding	FALSE	TRUE
ENSDARG00000068640	rsf1b.1.1	7.47756	2.84175	1.39176	remodeling and spacing factor 1b, tandem duplicate 1 [Source:ZFIN;Acc:ZDB-GENE-030131-5829]	24	23	protein_coding	FALSE	FALSE
ENSDARG00000071878	trmt112	7.47756	1.59012	0	tRNA methyltransferase 11-2 homolog (S. cerevisiae) [Source:ZFIN;Acc:ZDB-GENE-050522-30]	64	60	protein_coding	FALSE	FALSE
ENSDARG00000074131	kif5ba	7.47756	2.71293	1.23056	kinesin family member 5B, a [Source:ZFIN;Acc:ZDB-GENE-070629-2]	86	86	protein_coding	FALSE	FALSE
ENSDARG00000077068	si.ch211.11p18.6	7.47756	1.70857	0	si:ch211-11p18.6 [Source:ZFIN;Acc:ZDB-GENE-070912-24]	3	3	protein_coding	FALSE	FALSE
ENSDARG00000078567	lonrf1l	7.47756	1.54029	0	LON peptidase N-terminal domain and ring finger 1, like [Source:ZFIN;Acc:ZDB-GENE-081104-397]	49	48	protein_coding	FALSE	FALSE
ENSDARG00000078784	mgaa	7.47756	2.3169	0.697094	MGA, MAX dimerization protein a [Source:ZFIN;Acc:ZDB-GENE-030603-1]	25	25	protein_coding	TRUE	FALSE
ENSDARG00000088062	PPHLN1..1.to.many.	7.47756	2.92574	1.48557	periphilin 1 [Source:HGNC Symbol;Acc:HGNC:19369]	42	38	protein_coding	FALSE	FALSE
ENSDARG00000091926	si.dkey.103e21.5	7.47756	3.47071	2.09079	si:dkey-103e21.5 [Source:ZFIN;Acc:ZDB-GENE-060526-186]	0	0	protein_coding	FALSE	FALSE
ENSDARG00000100088	CU915738.1	7.47756	4.99633	3.74501		0	0	protein_coding	TRUE	FALSE
ENSDARG00000005652	man1a1	7.44717	1.59494	0	mannosidase, alpha, class 1A, member 1 [Source:ZFIN;Acc:ZDB-GENE-041014-321]	72	72	protein_coding	TRUE	FALSE
ENSDARG00000009724	rpn2	7.44717	3.33397	1.94567	ribophorin II [Source:ZFIN;Acc:ZDB-GENE-030131-7928]	64	66	protein_coding	TRUE	TRUE
ENSDARG00000019438	rnf13	7.44717	2.72055	1.2404	ring finger protein 13 [Source:ZFIN;Acc:ZDB-GENE-040426-772]	74	76	protein_coding	TRUE	FALSE
ENSDARG00000032619	tob1a	7.44717	3.65105	2.2801	transducer of ERBB2, 1a [Source:ZFIN;Acc:ZDB-GENE-031030-4]	84	85	protein_coding	FALSE	FALSE
ENSDARG00000044760	gnaia	7.44717	1.75814	0	guanine nucleotide binding protein (G protein), alpha inhibiting activity polypeptide a [Source:ZFIN;Acc:ZDB-GENE-030131-2229]	0	0	protein_coding	FALSE	TRUE
ENSDARG00000044915	sfmbt1	7.44717	4.08566	2.7376	Scm-like with four mbt domains 1 [Source:ZFIN;Acc:ZDB-GENE-030131-2592]	62	63	protein_coding	FALSE	FALSE
ENSDARG00000052536	tia1	7.44717	2.75221	1.2808	TIA1 cytotoxic granule-associated RNA binding protein [Source:ZFIN;Acc:ZDB-GENE-030131-1506]	81	82	protein_coding	FALSE	FALSE
ENSDARG00000056831	gng2	7.44717	2.09147	0.330624	guanine nucleotide binding protein (G protein), gamma 2 [Source:ZFIN;Acc:ZDB-GENE-050417-59]	94	94	protein_coding	FALSE	FALSE
ENSDARG00000060200	RGS10..1.to.many.	7.44717	1.63794	0	regulator of G-protein signaling 10 [Source:HGNC Symbol;Acc:HGNC:9992]	36	37	protein_coding	FALSE	FALSE
ENSDARG00000061718	znf704	7.44717	3.69647	2.3338	zinc finger protein 704 [Source:ZFIN;Acc:ZDB-GENE-060503-775]	55	56	protein_coding	FALSE	FALSE
ENSDARG00000070228	cdk6	7.44717	2.54561	1.01303	cyclin-dependent kinase 6 [Source:ZFIN;Acc:ZDB-GENE-060503-786]	80	80	protein_coding	FALSE	FALSE
ENSDARG00000070426	chac1	7.44717	2.18995	0.502785	ChaC, cation transport regulator homolog 1 (E. coli) [Source:ZFIN;Acc:ZDB-GENE-030131-1957]	56	55	protein_coding	FALSE	FALSE
ENSDARG00000071881	arl9	7.44717	4.05942	2.71437	ADP-ribosylation factor-like 9 [Source:ZFIN;Acc:ZDB-GENE-060825-210]	28	26	protein_coding	TRUE	FALSE
ENSDARG00000097042	si.dkey.199l17.5	7.44717	2.42178	0.840667	si:dkey-199l17.5 [Source:ZFIN;Acc:ZDB-GENE-131121-539]	0	0	processed_transcript	NA	NA
ENSDARG00000100394	lnpep	7.44717	1.84155	0	leucyl/cystinyl aminopeptidase [Source:ZFIN;Acc:ZDB-GENE-030131-1534]	55	55	protein_coding	TRUE	FALSE
ENSDARG00000002523	hsdl2	7.41677	3.128	1.72112	hydroxysteroid dehydrogenase like 2 [Source:ZFIN;Acc:ZDB-GENE-030131-1066]	71	70	protein_coding	FALSE	FALSE
ENSDARG00000002791	atp1a1a.1	7.41677	1.98825	0.135832	ATPase, Na+/K+ transporting, alpha 1a polypeptide, tandem duplicate 1 [Source:ZFIN;Acc:ZDB-GENE-001212-1]	88	89	protein_coding	TRUE	FALSE
ENSDARG00000007169	itgb1bp1	7.41677	2.44796	0.876832	integrin beta 1 binding protein 1 [Source:ZFIN;Acc:ZDB-GENE-051113-264]	77	79	protein_coding	FALSE	FALSE
ENSDARG00000011496	ppm1bb	7.41677	2.20791	0.532516	protein phosphatase, Mg2+/Mn2+ dependent, 1Bb [Source:ZFIN;Acc:ZDB-GENE-041114-185]	84	83	protein_coding	FALSE	FALSE
ENSDARG00000014571	ctnnb1	7.41677	4.45443	3.11935	catenin (cadherin-associated protein), beta 1 [Source:ZFIN;Acc:ZDB-GENE-980526-362]	96	96	protein_coding	FALSE	FALSE
ENSDARG00000015111	ddx39ab	7.41677	3.15271	1.74715	DEAD (Asp-Glu-Ala-Asp) box polypeptide 39Ab [Source:ZFIN;Acc:ZDB-GENE-040426-2902]	93	92	protein_coding	FALSE	FALSE
ENSDARG00000015126	gorasp2	7.41677	4.22672	2.87761	golgi reassembly stacking protein 2 [Source:ZFIN;Acc:ZDB-GENE-040426-1659]	67	67	protein_coding	FALSE	FALSE
ENSDARG00000017703	paqr3a	7.41677	2.77924	1.31197	progestin and adipoQ receptor family member IIIa [Source:ZFIN;Acc:ZDB-GENE-040426-1667]	74	75	protein_coding	TRUE	FALSE
ENSDARG00000028533	macf1a	7.41677	3.23565	1.83181	microtubule-actin crosslinking factor 1a [Source:ZFIN;Acc:ZDB-GENE-030131-3606]	56	56	protein_coding	FALSE	FALSE
ENSDARG00000034056	csnk1g2b	7.41677	3.49655	2.11546	casein kinase 1, gamma 2b [Source:ZFIN;Acc:ZDB-GENE-060825-285]	83	83	protein_coding	FALSE	FALSE
ENSDARG00000035835	eef2k	7.41677	4.47214	3.14166	eukaryotic elongation factor 2 kinase [Source:ZFIN;Acc:ZDB-GENE-020916-2]	62	62	protein_coding	FALSE	FALSE
ENSDARG00000038095	socs1a	7.41677	1.59058	0	suppressor of cytokine signaling 1a [Source:ZFIN;Acc:ZDB-GENE-040801-205]	41	41	protein_coding	FALSE	FALSE
ENSDARG00000042824	nfe2l2a	7.41677	4.21662	2.86841	nuclear factor, erythroid 2-like 2a [Source:ZFIN;Acc:ZDB-GENE-030723-2]	43	44	protein_coding	FALSE	FALSE
ENSDARG00000045980	cst14b.1	7.41677	4.01314	2.66652	cystatin 14b, tandem duplicate 1 [Source:ZFIN;Acc:ZDB-GENE-061013-189]	39	47	protein_coding	FALSE	FALSE
ENSDARG00000054903	mta3	7.41677	3.4932	2.11313	metastasis associated 1 family, member 3 [Source:ZFIN;Acc:ZDB-GENE-030131-6485]	62	55	protein_coding	FALSE	FALSE
ENSDARG00000055291	rab18a	7.41677	3.41336	2.03647	RAB18A, member RAS oncogene family [Source:ZFIN;Acc:ZDB-GENE-030131-3980]	82	82	protein_coding	FALSE	FALSE
ENSDARG00000055536	otub1a	7.41677	3.14287	1.73917	OTU deubiquitinase, ubiquitin aldehyde binding 1a [Source:ZFIN;Acc:ZDB-GENE-040718-108]	79	79	protein_coding	FALSE	FALSE
ENSDARG00000058325	casp8	7.41677	2.43965	0.867832	caspase 8, apoptosis-related cysteine peptidase [Source:ZFIN;Acc:ZDB-GENE-000713-1]	38	39	protein_coding	FALSE	FALSE
ENSDARG00000059363	TGFBR2..1.to.many.	7.41677	2.4888	0.933983	transforming growth factor beta receptor II [Source:HGNC Symbol;Acc:HGNC:11773]	48	48	protein_coding	TRUE	FALSE
ENSDARG00000062962	kmt2ba	7.41677	2.99567	1.57433	lysine (K)-specific methyltransferase 2Ba [Source:ZFIN;Acc:ZDB-GENE-060503-376]	31	31	protein_coding	FALSE	FALSE
ENSDARG00000067717	tomm7	7.41677	2.40219	0.814666	translocase of outer mitochondrial membrane 7 homolog (yeast) [Source:ZFIN;Acc:ZDB-GENE-060825-115]	33	32	protein_coding	TRUE	FALSE
ENSDARG00000068453	CABZ01112732.1	7.41677	3.09297	1.68393		0	0	protein_coding	FALSE	FALSE
ENSDARG00000070607	mrpl36	7.41677	3.18376	1.77875	mitochondrial ribosomal protein L36 [Source:ZFIN;Acc:ZDB-GENE-060503-821]	10	10	protein_coding	FALSE	FALSE
ENSDARG00000070959	si.ch211.288g17.3	7.41677	1.95178	0.0588368	si:ch211-288g17.3 [Source:ZFIN;Acc:ZDB-GENE-030131-461]	0	0	protein_coding	FALSE	FALSE
ENSDARG00000086126	trim33l	7.41677	2.51178	0.963371	tripartite motif containing 33, like [Source:ZFIN;Acc:ZDB-GENE-030131-5695]	0	0	protein_coding	FALSE	FALSE
ENSDARG00000090821	tp53rk	7.41677	3.30431	1.91511	TP53 regulating kinase [Source:ZFIN;Acc:ZDB-GENE-050522-123]	60	64	protein_coding	FALSE	FALSE
ENSDARG00000092546	pdap1a	7.41677	4.05393	2.70832	pdgfa associated protein 1a [Source:ZFIN;Acc:ZDB-GENE-030131-1693]	0	0	protein_coding	FALSE	FALSE
ENSDARG00000093024	si.ch211.213a13.2	7.41677	1.51011	0	si:ch211-213a13.2 [Source:ZFIN;Acc:ZDB-GENE-050208-551]	4	4	protein_coding	FALSE	FALSE
ENSDARG00000093760	si.ch211.197h24.9	7.41677	2.9965	1.57447	si:ch211-197h24.9 [Source:ZFIN;Acc:ZDB-GENE-031116-15]	0	0	protein_coding	FALSE	FALSE
ENSDARG00000103682	si.dkey.23i12.5	7.41677	1.76865	0	si:dkey-23i12.5 [Source:ZFIN;Acc:ZDB-GENE-141222-32]	0	0	processed_transcript	NA	NA
ENSDARG00000103987	cib1	7.41677	3.13638	1.73167	calcium and integrin binding 1 (calmyrin) [Source:ZFIN;Acc:ZDB-GENE-050417-170]	74	73	protein_coding	FALSE	FALSE
ENSDARG00000006477	ddi2	7.38637	2.92173	1.47964	DNA-damage inducible protein 2 [Source:ZFIN;Acc:ZDB-GENE-031030-15]	62	65	protein_coding	FALSE	FALSE
ENSDARG00000009771	ppme1	7.38637	2.56909	1.0439	protein phosphatase methylesterase 1 [Source:ZFIN;Acc:ZDB-GENE-030131-7064]	75	75	protein_coding	FALSE	FALSE
ENSDARG00000012682	pfn2l	7.38637	2.77957	1.31197	profilin 2 like [Source:ZFIN;Acc:ZDB-GENE-030131-34]	81	81	protein_coding	FALSE	FALSE
ENSDARG00000015829	mov10a	7.38637	3.25866	1.85983	Mov10 RISC complex RNA helicase a [Source:ZFIN;Acc:ZDB-GENE-091230-8]	43	43	protein_coding	FALSE	FALSE
ENSDARG00000016188	SBNO2..1.to.many.	7.38637	2.66444	1.1717	si:ch73-63e15.2 [Source:ZFIN;Acc:ZDB-GENE-091204-463]	54	55	protein_coding	FALSE	FALSE
ENSDARG00000023028	cdv3	7.38637	3.61406	2.24077	carnitine deficiency-associated gene expressed in ventricle 3 [Source:ZFIN;Acc:ZDB-GENE-030131-6034]	50	52	protein_coding	FALSE	FALSE
ENSDARG00000023394	slc37a2	7.38637	2.85197	1.4036	solute carrier family 37 (glucose-6-phosphate transporter), member 2 [Source:ZFIN;Acc:ZDB-GENE-040426-1949]	70	69	protein_coding	TRUE	FALSE
ENSDARG00000023396	atg5	7.38637	3.07447	1.66097	ATG5 autophagy related 5 homolog (S. cerevisiae) [Source:ZFIN;Acc:ZDB-GENE-040801-149]	80	81	protein_coding	FALSE	FALSE
ENSDARG00000029639	tomm70a	7.38637	2.71526	1.23407	translocase of outer mitochondrial membrane 70 homolog A (S. cerevisiae) [Source:ZFIN;Acc:ZDB-GENE-030131-8173]	81	83	protein_coding	TRUE	FALSE
ENSDARG00000036305	phf23b	7.38637	3.12808	1.72112	PHD finger protein 23b [Source:ZFIN;Acc:ZDB-GENE-030131-5895]	45	45	protein_coding	FALSE	FALSE
ENSDARG00000036542	pknox1.2	7.38637	3.8833	2.52134	pbx/knotted 1 homeobox 1.2 [Source:ZFIN;Acc:ZDB-GENE-020123-1]	70	70	protein_coding	FALSE	FALSE
ENSDARG00000038635	magoh	7.38637	2.10922	0.360788	mago homolog, exon junction complex core component [Source:ZFIN;Acc:ZDB-GENE-041216-1]	97	98	protein_coding	FALSE	FALSE
ENSDARG00000040310	prpf4bb	7.38637	1.87618	0	pre-mRNA processing factor 4Bb [Source:ZFIN;Acc:ZDB-GENE-040426-2799]	69	69	protein_coding	FALSE	FALSE
ENSDARG00000042796	yy1a	7.38637	3.3776	1.99427	YY1 transcription factor a [Source:ZFIN;Acc:ZDB-GENE-030131-1117]	13	41	protein_coding	FALSE	FALSE
ENSDARG00000052388	pcgf5b	7.38637	2.10775	0.359049	polycomb group ring finger 5b [Source:ZFIN;Acc:ZDB-GENE-060512-34]	82	82	protein_coding	FALSE	FALSE
ENSDARG00000054087	irs1	7.38637	1.91225	0	insulin receptor substrate 1 [Source:ZFIN;Acc:ZDB-GENE-030131-872]	59	60	protein_coding	FALSE	FALSE
ENSDARG00000056510	gstk1	7.38637	2.38322	0.791233	glutathione S-transferase kappa 1 [Source:ZFIN;Acc:ZDB-GENE-040718-298]	46	48	protein_coding	FALSE	FALSE
ENSDARG00000059109	si.dkeyp.113d7.1	7.38637	2.47875	0.921841	si:dkeyp-113d7.1 [Source:ZFIN;Acc:ZDB-GENE-030131-755]	26	0	protein_coding	FALSE	FALSE
ENSDARG00000059304	chchd2	7.38637	1.87591	0	coiled-coil-helix-coiled-coil-helix domain containing 2 [Source:ZFIN;Acc:ZDB-GENE-040426-1737]	59	61	protein_coding	FALSE	FALSE
ENSDARG00000073847	rbm15	7.38637	3.57509	2.19977	RNA binding motif protein 15 [Source:ZFIN;Acc:ZDB-GENE-041008-192]	64	64	protein_coding	FALSE	FALSE
ENSDARG00000073926	synrg	7.38637	2.93029	1.48991	synergin, gamma [Source:ZFIN;Acc:ZDB-GENE-030131-9396]	49	54	protein_coding	FALSE	FALSE
ENSDARG00000078188	fam160a2	7.38637	4.43647	3.1025	family with sequence similarity 160, member A2 [Source:ZFIN;Acc:ZDB-GENE-070912-291]	44	45	protein_coding	FALSE	FALSE
ENSDARG00000088507	znf982	7.38637	2.29288	0.661822	zinc finger protein 982 [Source:ZFIN;Acc:ZDB-GENE-131120-1]	0	0	protein_coding	FALSE	FALSE
ENSDARG00000090788	cstf2	7.38637	2.78502	1.31813	cleavage stimulation factor, 3' pre-RNA, subunit 2 [Source:ZFIN;Acc:ZDB-GENE-031118-2]	66	69	protein_coding	FALSE	FALSE
ENSDARG00000092288	si.ch211.214p13.7	7.38637	2.99648	1.57447	si:ch211-214p13.7 [Source:ZFIN;Acc:ZDB-GENE-060503-25]	0	0	processed_transcript	NA	NA
ENSDARG00000095678	ftr36	7.38637	2.83282	1.38127	finTRIM family, member 36 [Source:ZFIN;Acc:ZDB-GENE-070912-483]	0	0	protein_coding	FALSE	FALSE
ENSDARG00000098118	trappc10	7.38637	3.37163	1.98593	trafficking protein particle complex 10 [Source:ZFIN;Acc:ZDB-GENE-131115-1]	60	61	protein_coding	FALSE	FALSE
ENSDARG00000099148	bzw1b	7.38637	1.70232	0	basic leucine zipper and W2 domains 1b [Source:ZFIN;Acc:ZDB-GENE-040426-2881]	79	79	protein_coding	FALSE	FALSE
ENSDARG00000101277	znf207b	7.38637	2.65395	1.15878	zinc finger protein 207, b [Source:ZFIN;Acc:ZDB-GENE-030131-7377]	67	67	protein_coding	FALSE	FALSE
ENSDARG00000101520	si.dkeyp.14c8.1	7.38637	3.93763	2.58964	si:dkeyp-14c8.1 [Source:ZFIN;Acc:ZDB-GENE-141222-17]	0	0	processed_transcript	NA	NA
ENSDARG00000102766	DENND4C	7.38637	1.76244	0	DENN/MADD domain containing 4C [Source:HGNC Symbol;Acc:HGNC:26079]	60	62	protein_coding	FALSE	FALSE
ENSDARG00000102914	dennd4b	7.38637	3.94796	2.59815	DENN/MADD domain containing 4B [Source:ZFIN;Acc:ZDB-GENE-130530-684]	56	55	protein_coding	FALSE	FALSE
ENSDARG00000104153	zgc.175248	7.38637	1.79438	0	zgc:175248 [Source:ZFIN;Acc:ZDB-GENE-080204-93]	0	0	protein_coding	FALSE	FALSE
ENSDARG00000105467	CCR8..1.to.many.	7.38637	6.59294	5.52069	si:cabz01093077.1 [Source:ZFIN;Acc:ZDB-GENE-160113-45]	NA	NA	protein_coding	NA	NA
ENSDARG00000015392	dhx15	7.35598	4.13464	2.78616	DEAH (Asp-Glu-Ala-His) box helicase 15 [Source:ZFIN;Acc:ZDB-GENE-030131-650]	91	92	protein_coding	FALSE	FALSE
ENSDARG00000017525	ccnt1	7.35598	1.97911	0.118751	cyclin T1 [Source:ZFIN;Acc:ZDB-GENE-030131-6397]	54	54	protein_coding	FALSE	FALSE
ENSDARG00000021483	cdc14b.1	7.35598	1.90449	0	cell division cycle 14B [Source:ZFIN;Acc:ZDB-GENE-040426-820]	51	51	protein_coding	FALSE	FALSE
ENSDARG00000024631	NLRC5	7.35598	3.03833	1.62081	si:ch211-122c9.5 [Source:ZFIN;Acc:ZDB-GENE-120709-103]	23	23	protein_coding	FALSE	FALSE
ENSDARG00000028275	sult1st1	7.35598	2.47528	0.915767	sulfotransferase family 1, cytosolic sulfotransferase 1 [Source:ZFIN;Acc:ZDB-GENE-030131-2144]	0	0	protein_coding	FALSE	FALSE
ENSDARG00000029856	cnn3b	7.35598	3.35916	1.97207	calponin 3, acidic b [Source:ZFIN;Acc:ZDB-GENE-050522-263]	0	0	protein_coding	FALSE	FALSE
ENSDARG00000030213	sap30l	7.35598	1.57407	0	sap30-like [Source:ZFIN;Acc:ZDB-GENE-030131-5287]	85	87	protein_coding	FALSE	FALSE
ENSDARG00000045598	si.dkey.180p18.9	7.35598	3.69973	2.33746	si:dkey-180p18.9 [Source:ZFIN;Acc:ZDB-GENE-041210-132]	63	60	protein_coding	FALSE	FALSE
ENSDARG00000052157	il12rb2	7.35598	1.79974	0	interleukin 12 receptor, beta 2a [Source:ZFIN;Acc:ZDB-GENE-080107-3]	22	23	protein_coding	TRUE	FALSE
ENSDARG00000052697	fam172a	7.35598	3.93785	2.58964	family with sequence similarity 172, member A [Source:ZFIN;Acc:ZDB-GENE-040426-1396]	72	73	protein_coding	FALSE	TRUE
ENSDARG00000055900	zswim5	7.35598	3.43934	2.06246	zinc finger, SWIM-type containing 5 [Source:ZFIN;Acc:ZDB-GENE-030925-30]	83	83	protein_coding	FALSE	FALSE
ENSDARG00000055938	tspan14	7.35598	1.71136	0	tetraspanin 14 [Source:ZFIN;Acc:ZDB-GENE-060825-329]	72	72	protein_coding	TRUE	FALSE
ENSDARG00000056318	kansl2	7.35598	1.79261	0	KAT8 regulatory NSL complex subunit 2 [Source:ZFIN;Acc:ZDB-GENE-041010-67]	62	63	protein_coding	FALSE	FALSE
ENSDARG00000056583	ndufs6	7.35598	1.89297	0	NADH dehydrogenase (ubiquinone) Fe-S protein 6 [Source:ZFIN;Acc:ZDB-GENE-040912-86]	60	60	protein_coding	FALSE	FALSE
ENSDARG00000058230	rps6kb1b	7.35598	2.34091	0.732814	ribosomal protein S6 kinase b, polypeptide 1b [Source:ZFIN;Acc:ZDB-GENE-040426-2038]	85	85	protein_coding	FALSE	FALSE
ENSDARG00000059323	rpn1	7.35598	3.51432	2.1304	ribophorin I [Source:ZFIN;Acc:ZDB-GENE-030131-4286]	71	71	protein_coding	TRUE	TRUE
ENSDARG00000059816	zgc.136864	7.35598	3.01736	1.59564	zgc:136864 [Source:ZFIN;Acc:ZDB-GENE-060331-129]	53	55	protein_coding	FALSE	FALSE
ENSDARG00000061228	pfdn4	7.35598	3.05916	1.64715	prefoldin subunit 4 [Source:ZFIN;Acc:ZDB-GENE-100922-122]	81	81	protein_coding	FALSE	FALSE
ENSDARG00000062085	tkfc	7.35598	4.47271	3.14166	triokinase/FMN cyclase [Source:ZFIN;Acc:ZDB-GENE-060929-652]	56	57	protein_coding	FALSE	FALSE
ENSDARG00000062268	jarid2b	7.35598	2.76958	1.29951	jumonji, AT rich interactive domain 2b [Source:ZFIN;Acc:ZDB-GENE-060503-246]	57	58	protein_coding	FALSE	FALSE
ENSDARG00000062304	pdpk1a	7.35598	1.60877	0	3-phosphoinositide dependent protein kinase 1a [Source:ZFIN;Acc:ZDB-GENE-061013-109]	76	76	protein_coding	FALSE	TRUE
ENSDARG00000069850	mrpl30	7.35598	2.89684	1.45004	mitochondrial ribosomal protein L30 [Source:ZFIN;Acc:ZDB-GENE-050522-240]	54	40	protein_coding	FALSE	FALSE
ENSDARG00000074552	ndufs7	7.35598	2.44321	0.871287	NADH dehydrogenase (ubiquinone) Fe-S protein 7, (NADH-coenzyme Q reductase) [Source:ZFIN;Acc:ZDB-GENE-041111-261]	65	65	protein_coding	FALSE	FALSE
ENSDARG00000075559	ppm1g	7.35598	3.25139	1.85131	protein phosphatase, Mg2+/Mn2+ dependent, 1G [Source:ZFIN;Acc:ZDB-GENE-030425-4]	67	69	protein_coding	FALSE	FALSE
ENSDARG00000086365	BX004816.3	7.35598	2.22621	0.560255		0	0	protein_coding	FALSE	FALSE
ENSDARG00000089924	aldh2.1	7.35598	3.35314	1.96625	aldehyde dehydrogenase 2 family (mitochondrial), tandem duplicate 1 [Source:ZFIN;Acc:ZDB-GENE-040426-1262]	78	78	protein_coding	FALSE	FALSE
ENSDARG00000090910	si.ch211.152f22.4	7.35598	4.13998	2.788	si:ch211-152f22.4 [Source:ZFIN;Acc:ZDB-GENE-130603-60]	0	0	protein_coding	FALSE	FALSE
ENSDARG00000099243	CR855389.1	7.35598	2.36553	0.767796		0	0	protein_coding	FALSE	FALSE
ENSDARG00000102434	si.dkey.13m1.2	7.35598	3.41852	2.04011	si:dkey-13m1.2 [Source:ZFIN;Acc:ZDB-GENE-141216-261]	0	0	protein_coding	FALSE	TRUE
ENSDARG00000104311	scmh1	7.35598	3.01741	1.59564	sex comb on midleg homolog 1 (Drosophila) [Source:ZFIN;Acc:ZDB-GENE-070410-82]	57	57	protein_coding	FALSE	FALSE
ENSDARG00000001057	bysl	7.32558	1.65048	0	bystin-like [Source:ZFIN;Acc:ZDB-GENE-040426-1287]	67	68	protein_coding	FALSE	FALSE
ENSDARG00000005883	rfx1a	7.32558	3.08665	1.67646	regulatory factor X, 1a (influences HLA class II expression) [Source:ZFIN;Acc:ZDB-GENE-070424-94]	67	67	protein_coding	FALSE	FALSE
ENSDARG00000006812	wdr26b	7.32558	2.92142	1.47964	WD repeat domain 26b [Source:ZFIN;Acc:ZDB-GENE-041014-277]	87	87	protein_coding	FALSE	FALSE
ENSDARG00000016903	wdr5	7.32558	3.98341	2.63345	WD repeat domain 5 [Source:ZFIN;Acc:ZDB-GENE-040426-2082]	78	96	protein_coding	FALSE	FALSE
ENSDARG00000018898	zfand5a	7.32558	3.03093	1.61079	zinc finger, AN1-type domain 5a [Source:ZFIN;Acc:ZDB-GENE-040426-1979]	64	64	protein_coding	FALSE	FALSE
ENSDARG00000021811	calm1a	7.32558	2.02441	0.195467	calmodulin 1a [Source:ZFIN;Acc:ZDB-GENE-030131-8308]	100	0	protein_coding	FALSE	FALSE
ENSDARG00000029146	lrp1ab	7.32558	4.05307	2.70832	low density lipoprotein receptor-related protein 1Ab [Source:ZFIN;Acc:ZDB-GENE-030131-7126]	76	76	protein_coding	TRUE	TRUE
ENSDARG00000031985	ppp2r4	7.32558	3.11251	1.70689	protein phosphatase 2A activator, regulatory subunit 4 [Source:ZFIN;Acc:ZDB-GENE-040801-11]	80	81	protein_coding	FALSE	FALSE
ENSDARG00000033138	lyrm2.1	7.32558	1.62483	0	LYR motif containing 2 [Source:ZFIN;Acc:ZDB-GENE-040914-27]	66	64	protein_coding	FALSE	FALSE
ENSDARG00000036359	minal	7.32558	2.98005	1.55341	MYC induced nuclear antigen-like [Source:ZFIN;Acc:ZDB-GENE-040426-1283]	47	51	protein_coding	FALSE	FALSE
ENSDARG00000039125	map4k5	7.32558	2.6686	1.17678	mitogen-activated protein kinase kinase kinase kinase 5 [Source:ZFIN;Acc:ZDB-GENE-030131-6497]	75	76	protein_coding	FALSE	FALSE
ENSDARG00000043928	gpn1	7.32558	3.28525	1.89099	GPN-loop GTPase 1 [Source:ZFIN;Acc:ZDB-GENE-040801-154]	71	72	protein_coding	FALSE	FALSE
ENSDARG00000045355	tceb1a	7.32558	3.83115	2.46803	transcription elongation factor B (SIII), polypeptide 1a [Source:ZFIN;Acc:ZDB-GENE-040912-120]	0	0	protein_coding	FALSE	FALSE
ENSDARG00000045506	gramd4b	7.32558	2.3064	0.681339	GRAM domain containing 4b [Source:ZFIN;Acc:ZDB-GENE-030131-4780]	66	65	protein_coding	TRUE	FALSE
ENSDARG00000052866	htt	7.32558	3.67662	2.31283	huntingtin [Source:ZFIN;Acc:ZDB-GENE-990415-131]	71	72	protein_coding	FALSE	FALSE
ENSDARG00000054540	imp4	7.32558	3.91767	2.56597	IMP4, U3 small nucleolar ribonucleoprotein, homolog (yeast) [Source:ZFIN;Acc:ZDB-GENE-040718-474]	77	77	protein_coding	FALSE	FALSE
ENSDARG00000059070	gars	7.32558	2.71007	1.22728	glycyl-tRNA synthetase [Source:ZFIN;Acc:ZDB-GENE-030131-9174]	79	80	protein_coding	FALSE	FALSE
ENSDARG00000063333	nup210	7.32558	3.72616	2.36263	nucleoporin 210 [Source:ZFIN;Acc:ZDB-GENE-050208-132]	61	61	protein_coding	TRUE	TRUE
ENSDARG00000074332	SPEN..1.to.many.	7.32558	2.59235	1.0751	si:ch1073-335m2.2 [Source:ZFIN;Acc:ZDB-GENE-081104-82]	42	43	protein_coding	FALSE	FALSE
ENSDARG00000077126	snrnp70	7.32558	3.44044	2.06246	small nuclear ribonucleoprotein 70 (U1) [Source:ZFIN;Acc:ZDB-GENE-040825-2]	59	59	protein_coding	FALSE	FALSE
ENSDARG00000078778	lrch1	7.32558	2.791	1.32497	leucine-rich repeats and calponin homology (CH) domain containing 1 [Source:ZFIN;Acc:ZDB-GENE-030131-1783]	54	56	protein_coding	FALSE	FALSE
ENSDARG00000095432	si.rp71.26b20.1	7.32558	4.11763	2.77553	si:rp71-26b20.1 [Source:ZFIN;Acc:ZDB-GENE-091116-47]	0	0	lincRNA	NA	NA
ENSDARG00000096003	USMG5	7.32558	1.72454	0	si:dkeyp-80c12.10 [Source:ZFIN;Acc:ZDB-GENE-110914-234]	62	64	protein_coding	TRUE	FALSE
ENSDARG00000098772	gig2d	7.32558	2.69211	1.20326	grass carp reovirus (GCRV)-induced gene 2d [Source:ZFIN;Acc:ZDB-GENE-130517-1]	0	0	protein_coding	FALSE	FALSE
ENSDARG00000098879	si.dkey.4j21.2	7.32558	1.87296	0	si:dkey-4j21.2 [Source:ZFIN;Acc:ZDB-GENE-120703-3]	0	0	protein_coding	FALSE	FALSE
ENSDARG00000101939	BX324216.3	7.32558	4.03982	2.69429		0	0	protein_coding	FALSE	TRUE
ENSDARG00000103449	CR391944.2	7.32558	1.64566	0		0	0	protein_coding	FALSE	FALSE
ENSDARG00000104684	si.dkey.161l11.68	7.32558	1.91115	0	si:dkey-161l11.68 [Source:ZFIN;Acc:ZDB-GENE-141212-175]	0	0	IG_C_gene	FALSE	FALSE
ENSDARG00000004470	prkcsh	7.29518	2.53642	0.997009	protein kinase C substrate 80K-H [Source:ZFIN;Acc:ZDB-GENE-040426-770]	59	60	protein_coding	TRUE	TRUE
ENSDARG00000013628	cd164	7.29518	3.0156	1.5945	CD164 molecule, sialomucin [Source:ZFIN;Acc:ZDB-GENE-030131-1598]	41	41	protein_coding	TRUE	TRUE
ENSDARG00000017034	sqrdl	7.29518	3.82186	2.45756	sulfide quinone reductase-like (yeast) [Source:ZFIN;Acc:ZDB-GENE-050417-436]	64	42	protein_coding	FALSE	FALSE
ENSDARG00000017084	bud31	7.29518	2.19618	0.510236	BUD31 homolog (S. cerevisiae) [Source:ZFIN;Acc:ZDB-GENE-040720-3]	69	96	protein_coding	FALSE	FALSE
ENSDARG00000020607	emc3	7.29518	3.44394	2.06417	ER membrane protein complex subunit 3 [Source:ZFIN;Acc:ZDB-GENE-040426-2904]	89	90	protein_coding	TRUE	FALSE
ENSDARG00000032868	pde4ba.1	7.29518	1.85203	0	phosphodiesterase 4B, cAMP-specific a [Source:ZFIN;Acc:ZDB-GENE-030131-9570]	74	80	protein_coding	FALSE	FALSE
ENSDARG00000034685	tmem198b	7.29518	4.79755	3.50039	transmembrane protein 198b [Source:ZFIN;Acc:ZDB-GENE-050809-123]	45	59	protein_coding	TRUE	FALSE
ENSDARG00000037928	ddx42	7.29518	2.44492	0.872648	DEAD (Asp-Glu-Ala-Asp) box helicase 42 [Source:ZFIN;Acc:ZDB-GENE-050706-53]	74	73	protein_coding	FALSE	FALSE
ENSDARG00000038537	gga1	7.29518	2.88868	1.44332	golgi-associated, gamma adaptin ear containing, ARF binding protein 1 [Source:ZFIN;Acc:ZDB-GENE-040822-13]	62	63	protein_coding	FALSE	FALSE
ENSDARG00000039328	ccndbp1	7.29518	3.35296	1.96625	cyclin D-type binding-protein 1 [Source:ZFIN;Acc:ZDB-GENE-070410-17]	38	38	protein_coding	FALSE	FALSE
ENSDARG00000039969	akirin1	7.29518	2.29653	0.668271	akirin 1 [Source:ZFIN;Acc:ZDB-GENE-040426-2178]	57	59	protein_coding	FALSE	FALSE
ENSDARG00000051800	fnbp4	7.29518	1.92985	0.0174583	formin binding protein 4 [Source:ZFIN;Acc:ZDB-GENE-130530-633]	56	55	protein_coding	FALSE	FALSE
ENSDARG00000056532	serinc2	7.29518	2.33742	0.727969	serine incorporator 2 [Source:ZFIN;Acc:ZDB-GENE-041111-296]	61	59	protein_coding	TRUE	TRUE
ENSDARG00000061214	lipin2	7.29518	2.43627	0.864443	lipin 2 [Source:ZFIN;Acc:ZDB-GENE-060503-153]	61	62	protein_coding	FALSE	FALSE
ENSDARG00000063187	agpat5	7.29518	3.70751	2.34056	1-acylglycerol-3-phosphate O-acyltransferase 5 (lysophosphatidic acid acyltransferase, epsilon) [Source:ZFIN;Acc:ZDB-GENE-060929-914]	64	68	protein_coding	TRUE	FALSE
ENSDARG00000070076	actr2b	7.29518	3.90774	2.55416	ARP2 actin-related protein 2b homolog (yeast) [Source:ZFIN;Acc:ZDB-GENE-050410-4]	96	96	protein_coding	FALSE	FALSE
ENSDARG00000070847	trim35.20	7.29518	2.08518	0.317904	tripartite motif containing 35-20 [Source:ZFIN;Acc:ZDB-GENE-110920-8]	30	33	protein_coding	FALSE	FALSE
ENSDARG00000071566	ppp1cab	7.29518	1.56231	0	protein phosphatase 1, catalytic subunit, alpha isozyme b [Source:ZFIN;Acc:ZDB-GENE-030131-5512]	82	82	protein_coding	FALSE	FALSE
ENSDARG00000074084	strip1	7.29518	4.67	3.36207	striatin interacting protein 1 [Source:ZFIN;Acc:ZDB-GENE-040426-2927]	79	79	protein_coding	FALSE	FALSE
ENSDARG00000075015	soul5	7.29518	6.5953	5.52069	heme-binding protein soul5 [Source:ZFIN;Acc:ZDB-GENE-110718-2]	0	0	protein_coding	FALSE	TRUE
ENSDARG00000080010	adh5	7.29518	2.40013	0.811845	alcohol dehydrogenase 5 [Source:ZFIN;Acc:ZDB-GENE-011003-1]	80	80	protein_coding	FALSE	FALSE
ENSDARG00000087429	si.dkey.73p2.2	7.29518	1.72134	0	si:dkey-73p2.2 [Source:ZFIN;Acc:ZDB-GENE-131119-50]	0	0	protein_coding	FALSE	FALSE
ENSDARG00000091187	UIMC1	7.29518	2.05871	0.268725	ubiquitin interaction motif containing 1 [Source:HGNC Symbol;Acc:HGNC:30298]	19	20	protein_coding	FALSE	FALSE
ENSDARG00000094747	si.ch211.197g15.6.1	7.29518	3.63451	2.2647	si:ch211-197g15.6 [Source:ZFIN;Acc:ZDB-GENE-050208-457]	0	0	protein_coding	FALSE	FALSE
ENSDARG00000100825	calm3a.1	7.29518	2.37455	0.779626	calmodulin 3a (phosphorylase kinase, delta) [Source:ZFIN;Acc:ZDB-GENE-030131-5590]	0	100	protein_coding	FALSE	FALSE
ENSDARG00000101421	si.dkeyp.80d11.10	7.29518	2.09829	0.342042	si:dkeyp-80d11.10 [Source:ZFIN;Acc:ZDB-GENE-070424-271]	0	0	protein_coding	FALSE	FALSE
ENSDARG00000101744	hug	7.29518	1.59186	0	HuG [Source:ZFIN;Acc:ZDB-GENE-000210-17]	83	83	protein_coding	FALSE	FALSE
ENSDARG00000102332	SPINT1..1.to.many.	7.29518	4.4014	3.06189	serine peptidase inhibitor, Kunitz type 1 [Source:HGNC Symbol;Acc:HGNC:11246]	36	36	protein_coding	FALSE	TRUE
ENSDARG00000102495	CT573234.4	7.29518	4.26756	2.92543		0	0	protein_coding	FALSE	FALSE
ENSDARG00000001829	zgc.112982	7.26479	2.64677	1.14766	zgc:112982 [Source:ZFIN;Acc:ZDB-GENE-050306-55]	0	0	protein_coding	FALSE	FALSE
ENSDARG00000003109	rcan1a	7.26479	3.99622	2.64904	regulator of calcineurin 1a [Source:ZFIN;Acc:ZDB-GENE-040801-135]	56	56	protein_coding	FALSE	FALSE
ENSDARG00000004587	kat5a	7.26479	3.00116	1.57885	K(lysine) acetyltransferase 5a [Source:ZFIN;Acc:ZDB-GENE-040718-57]	0	0	protein_coding	FALSE	FALSE
ENSDARG00000004937	skp2	7.26479	3.72896	2.36459	S-phase kinase-associated protein 2, E3 ubiquitin protein ligase [Source:ZFIN;Acc:ZDB-GENE-030219-158]	46	45	protein_coding	FALSE	FALSE
ENSDARG00000006031	abat	7.26479	4.19287	2.8434	4-aminobutyrate aminotransferase [Source:ZFIN;Acc:ZDB-GENE-031006-4]	70	70	protein_coding	FALSE	FALSE
ENSDARG00000009473	ppardb	7.26479	3.79267	2.42866	peroxisome proliferator-activated receptor delta b [Source:ZFIN;Acc:ZDB-GENE-000112-47]	62	62	protein_coding	FALSE	FALSE
ENSDARG00000010051	ufd1l	7.26479	1.53948	0	ubiquitin fusion degradation 1 like (yeast) [Source:ZFIN;Acc:ZDB-GENE-040718-150]	86	86	protein_coding	FALSE	FALSE
ENSDARG00000012871	npepl1	7.26479	2.41232	0.828369	aminopeptidase-like 1 [Source:ZFIN;Acc:ZDB-GENE-050417-177]	79	81	protein_coding	FALSE	FALSE
ENSDARG00000014024	ms4a17a.4	7.26479	2.17046	0.470929	membrane-spanning 4-domains, subfamily A, member 17A.4 [Source:ZFIN;Acc:ZDB-GENE-070822-16]	23	19	protein_coding	TRUE	FALSE
ENSDARG00000017891	tcp1	7.26479	1.69073	0	t-complex 1 [Source:ZFIN;Acc:ZDB-GENE-990714-24]	85	86	protein_coding	FALSE	FALSE
ENSDARG00000019345	mark3a	7.26479	1.8214	0	MAP/microtubule affinity-regulating kinase 3a [Source:ZFIN;Acc:ZDB-GENE-030131-6232]	75	76	protein_coding	FALSE	FALSE
ENSDARG00000020043	cnot8	7.26479	2.94332	1.5051	CCR4-NOT transcription complex, subunit 8 [Source:ZFIN;Acc:ZDB-GENE-040426-2845]	84	84	protein_coding	FALSE	FALSE
ENSDARG00000021975	ginm1	7.26479	3.23994	1.83565	glycoprotein integral membrane 1 [Source:ZFIN;Acc:ZDB-GENE-030131-5900]	28	28	protein_coding	TRUE	TRUE
ENSDARG00000027078	cnppd1	7.26479	1.53442	0	cyclin Pas1/PHO80 domain containing 1 [Source:ZFIN;Acc:ZDB-GENE-030131-6808]	45	46	protein_coding	FALSE	FALSE
ENSDARG00000031388	dctn2	7.26479	2.83475	1.3827	dynactin 2 (p50) [Source:ZFIN;Acc:ZDB-GENE-040426-1279]	68	71	protein_coding	FALSE	FALSE
ENSDARG00000033647	smarcb1a	7.26479	1.97215	0.102563	SWI/SNF related, matrix associated, actin dependent regulator of chromatin, subfamily b, member 1a [Source:ZFIN;Acc:ZDB-GENE-041114-5]	96	96	protein_coding	FALSE	FALSE
ENSDARG00000038094	clec16a	7.26479	2.52948	0.989199	C-type lectin domain family 16, member A [Source:ZFIN;Acc:ZDB-GENE-040426-951]	69	70	protein_coding	FALSE	FALSE
ENSDARG00000042623	acbd3	7.26479	2.97636	1.54931	acyl-Coenzyme A binding domain containing 3 [Source:ZFIN;Acc:ZDB-GENE-040426-1930]	66	68	protein_coding	FALSE	FALSE
ENSDARG00000042644	sod2	7.26479	2.59638	1.08132	superoxide dismutase 2, mitochondrial [Source:ZFIN;Acc:ZDB-GENE-030131-7742]	80	80	protein_coding	FALSE	FALSE
ENSDARG00000052842	ppifb	7.26479	2.1556	0.44554	peptidylprolyl isomerase Fb [Source:ZFIN;Acc:ZDB-GENE-051030-126]	70	70	protein_coding	FALSE	FALSE
ENSDARG00000055373	sema3fb	7.26479	2.29166	0.659841	sema domain, immunoglobulin domain (Ig), short basic domain, secreted, (semaphorin) 3Fb [Source:ZFIN;Acc:ZDB-GENE-050513-2]	68	69	protein_coding	FALSE	TRUE
ENSDARG00000056160	hspd1	7.26479	1.93764	0.0297208	heat shock 60 protein 1 [Source:ZFIN;Acc:ZDB-GENE-021206-1]	88	87	protein_coding	FALSE	FALSE
ENSDARG00000057624	cops5	7.26479	3.87047	2.50524	COP9 signalosome subunit 5 [Source:ZFIN;Acc:ZDB-GENE-040426-1686]	95	96	protein_coding	FALSE	FALSE
ENSDARG00000058041	ndufa8	7.26479	3.49458	2.1143	NADH dehydrogenase (ubiquinone) 1 alpha subcomplex, 8 [Source:ZFIN;Acc:ZDB-GENE-040426-1688]	76	74	protein_coding	FALSE	FALSE
ENSDARG00000058419	gcn1	7.26479	3.97319	2.62458	GCN1 eIF2 alpha kinase activator homolog [Source:ZFIN;Acc:ZDB-GENE-040724-264]	73	74	protein_coding	FALSE	TRUE
ENSDARG00000058729	akirin2	7.26479	2.2368	0.575645	akirin 2 [Source:ZFIN;Acc:ZDB-GENE-040426-2944]	82	83	protein_coding	FALSE	FALSE
ENSDARG00000061169	larp1b	7.26479	2.41663	0.83514	La ribonucleoprotein domain family, member 1B [Source:ZFIN;Acc:ZDB-GENE-030131-4154]	14	45	protein_coding	FALSE	FALSE
ENSDARG00000073696	frmd8	7.26479	1.87262	0	FERM domain containing 8 [Source:ZFIN;Acc:ZDB-GENE-090812-5]	54	54	protein_coding	FALSE	FALSE
ENSDARG00000078101	si.dkey.121n8.3	7.26479	1.98171	0.123041	si:dkey-121n8.3 [Source:ZFIN;Acc:ZDB-GENE-070912-362]	0	0	protein_coding	FALSE	FALSE
ENSDARG00000078113	atp5ia	7.26479	2.90863	1.46328	ATP synthase, H+ transporting, mitochondrial Fo complex, subunit Ea [Source:ZFIN;Acc:ZDB-GENE-070928-12]	65	62	protein_coding	FALSE	FALSE
ENSDARG00000090552	si.dkey.7j14.6	7.26479	6.40379	5.31249	si:dkey-7j14.6 [Source:ZFIN;Acc:ZDB-GENE-030131-8466]	0	0	protein_coding	TRUE	FALSE
ENSDARG00000091563	snw1	7.26479	1.92114	0.000951521	SNW domain containing 1 [Source:ZFIN;Acc:ZDB-GENE-030131-571]	63	62	protein_coding	FALSE	FALSE
ENSDARG00000096632	si.dkey.22o12.7	7.26479	2.79179	1.32572	si:dkey-22o12.7 [Source:ZFIN;Acc:ZDB-GENE-121214-4]	0	0	lincRNA	NA	NA
ENSDARG00000100965	ep400	7.26479	2.80464	1.34292	E1A binding protein p400 [Source:ZFIN;Acc:ZDB-GENE-081104-186]	0	0	protein_coding	FALSE	FALSE
ENSDARG00000103618	btr18	7.26479	3.0971	1.68773	bloodthirsty-related gene family, member 18 [Source:ZFIN;Acc:ZDB-GENE-080213-2]	18	29	protein_coding	FALSE	FALSE
ENSDARG00000004297	irf2bpl	7.23439	1.78477	0	interferon regulatory factor 2 binding protein-like [Source:ZFIN;Acc:ZDB-GENE-040426-1968]	72	72	protein_coding	FALSE	FALSE
ENSDARG00000007264	gbas	7.23439	3.12009	1.71412	glioblastoma amplified sequence [Source:ZFIN;Acc:ZDB-GENE-991008-18]	71	74	protein_coding	FALSE	FALSE
ENSDARG00000016721	sdha	7.23439	4.48198	3.14959	succinate dehydrogenase complex, subunit A, flavoprotein (Fp) [Source:ZFIN;Acc:ZDB-GENE-040426-874]	79	79	protein_coding	FALSE	FALSE
ENSDARG00000018272	wdr33	7.23439	3.06876	1.65661	WD repeat domain 33 [Source:ZFIN;Acc:ZDB-GENE-040924-3]	62	63	protein_coding	TRUE	FALSE
ENSDARG00000019417	gadd45ga	7.23439	2.83366	1.38209	growth arrest and DNA-damage-inducible, gamma a [Source:ZFIN;Acc:ZDB-GENE-040426-1882]	66	66	protein_coding	FALSE	FALSE
ENSDARG00000027907	CR318603.2	7.23439	2.01975	0.187355		15	24	protein_coding	FALSE	FALSE
ENSDARG00000032601	macrod2	7.23439	3.78163	2.42131	MACRO domain containing 2 [Source:ZFIN;Acc:ZDB-GENE-040426-1490]	28	29	protein_coding	FALSE	FALSE
ENSDARG00000035043	pfdn5	7.23439	2.39649	0.809672	prefoldin 5 [Source:ZFIN;Acc:ZDB-GENE-030131-6858]	79	79	protein_coding	FALSE	FALSE
ENSDARG00000035993	sumo3b	7.23439	3.5003	2.11671	small ubiquitin-like modifier 3b [Source:ZFIN;Acc:ZDB-GENE-040718-426]	98	96	protein_coding	FALSE	FALSE
ENSDARG00000037153	atp6ap1b	7.23439	2.7201	1.24022	ATPase, H+ transporting, lysosomal accessory protein 1b [Source:ZFIN;Acc:ZDB-GENE-020423-2]	42	43	protein_coding	TRUE	FALSE
ENSDARG00000037318	ddost	7.23439	1.82529	0	dolichyl-diphosphooligosaccharide--protein glycosyltransferase subunit (non-catalytic) [Source:ZFIN;Acc:ZDB-GENE-040426-2147]	82	82	protein_coding	TRUE	TRUE
ENSDARG00000043960	rpf2	7.23439	3.07241	1.66039	ribosome production factor 2 homolog [Source:ZFIN;Acc:ZDB-GENE-040426-2501]	69	71	protein_coding	FALSE	FALSE
ENSDARG00000056557	copb1	7.23439	3.10074	1.6922	coatomer protein complex, subunit beta 1 [Source:ZFIN;Acc:ZDB-GENE-030219-38]	94	94	protein_coding	FALSE	FALSE
ENSDARG00000058746	ubap1	7.23439	2.16321	0.459285	ubiquitin associated protein 1 [Source:ZFIN;Acc:ZDB-GENE-040426-950]	48	49	protein_coding	FALSE	FALSE
ENSDARG00000061774	mbd3a	7.23439	1.90686	0	methyl-CpG binding domain protein 3a [Source:ZFIN;Acc:ZDB-GENE-030131-9077]	19	22	protein_coding	FALSE	FALSE
ENSDARG00000062450	rnf115	7.23439	2.35811	0.757409	ring finger protein 115 [Source:ZFIN;Acc:ZDB-GENE-061215-82]	59	59	protein_coding	FALSE	FALSE
ENSDARG00000079905	mark2a	7.23439	2.82387	1.3697	MAP/microtubule affinity-regulating kinase 2a [Source:ZFIN;Acc:ZDB-GENE-030131-4145]	71	71	protein_coding	FALSE	FALSE
ENSDARG00000086342	zgc.101566	7.23439	4.55132	3.23357	zgc:101566 [Source:ZFIN;Acc:ZDB-GENE-041010-73]	0	0	protein_coding	FALSE	FALSE
ENSDARG00000087528	snip1	7.23439	2.67171	1.17999	Smad nuclear interacting protein [Source:ZFIN;Acc:ZDB-GENE-041026-3]	54	57	protein_coding	FALSE	FALSE
ENSDARG00000088929	ypel5	7.23439	3.57617	2.19977	yippee-like 5 [Source:ZFIN;Acc:ZDB-GENE-040426-1220]	91	91	protein_coding	FALSE	FALSE
ENSDARG00000089821	BX957278.2	7.23439	3.48994	2.11002		0	0	protein_coding	FALSE	FALSE
ENSDARG00000090181	si.dkey.242e21.4	7.23439	2.05449	0.259499	si:dkey-242e21.4 [Source:ZFIN;Acc:ZDB-GENE-100921-86]	0	0	processed_transcript	NA	NA
ENSDARG00000091902	b3gnt2b	7.23439	3.86862	2.50379	UDP-GlcNAc:betaGal beta-1,3-N-acetylglucosaminyltransferase 2b [Source:ZFIN;Acc:ZDB-GENE-050913-158]	57	57	protein_coding	FALSE	TRUE
ENSDARG00000098843	FQ311879.1	7.23439	2.11937	0.375468		0	0	protein_coding	TRUE	FALSE
ENSDARG00000100020	pim1	7.23439	3.76789	2.40788	Pim-1 proto-oncogene, serine/threonine kinase [Source:ZFIN;Acc:ZDB-GENE-061013-139]	69	70	protein_coding	FALSE	FALSE
ENSDARG00000100400	si.ch1073.435i13.1	7.23439	5.47266	4.28531	si:ch1073-435i13.1 [Source:ZFIN;Acc:ZDB-GENE-160114-33]	73	71	processed_transcript	FALSE	FALSE
ENSDARG00000100669	si.zfos.2131b9.2	7.23439	2.63937	1.13959	si:zfos-2131b9.2 [Source:ZFIN;Acc:ZDB-GENE-131118-24]	11	10	protein_coding	FALSE	FALSE
ENSDARG00000003641	tfg	7.20399	2.55268	1.02158	trk-fused gene [Source:ZFIN;Acc:ZDB-GENE-030131-8410]	68	68	protein_coding	FALSE	FALSE
ENSDARG00000004046	phf6	7.20399	3.51193	2.1304	PHD finger protein 6 [Source:ZFIN;Acc:ZDB-GENE-030131-5278]	67	68	protein_coding	FALSE	FALSE
ENSDARG00000006642	drg2	7.20399	2.15377	0.444466	developmentally regulated GTP binding protein 2 [Source:ZFIN;Acc:ZDB-GENE-040808-29]	92	91	protein_coding	FALSE	FALSE
ENSDARG00000008592	mtmr8	7.20399	3.4554	2.07153	myotubularin related protein 8 [Source:ZFIN;Acc:ZDB-GENE-040426-1016]	0	57	protein_coding	FALSE	FALSE
ENSDARG00000011488	sirt2	7.20399	1.99406	0.143922	sirtuin 2 (silent mating type information regulation 2, homolog) 2 (S. cerevisiae) [Source:ZFIN;Acc:ZDB-GENE-030131-1028]	63	62	protein_coding	FALSE	FALSE
ENSDARG00000014083	wdr82	7.20399	2.10922	0.360788	WD repeat domain 82 [Source:ZFIN;Acc:ZDB-GENE-030131-333]	94	94	protein_coding	FALSE	FALSE
ENSDARG00000018742	psme4b	7.20399	2.16575	0.463251	proteasome activator subunit 4b [Source:ZFIN;Acc:ZDB-GENE-100316-4]	76	77	protein_coding	FALSE	FALSE
ENSDARG00000019332	ndufb4	7.20399	3.1107	1.70538	NADH dehydrogenase (ubiquinone) 1 beta subcomplex, 4 [Source:ZFIN;Acc:ZDB-GENE-040426-1973]	37	38	protein_coding	TRUE	FALSE
ENSDARG00000020618	zgc.112056	7.20399	3.16068	1.75601	zgc:112056 [Source:ZFIN;Acc:ZDB-GENE-050417-147]	73	74	protein_coding	FALSE	FALSE
ENSDARG00000030532	ARHGEF12..1.to.many.	7.20399	2.26919	0.624652	Rho guanine nucleotide exchange factor 12 [Source:HGNC Symbol;Acc:HGNC:14193]	51	52	protein_coding	FALSE	FALSE
ENSDARG00000031795	abcf1	7.20399	2.15086	0.440679	ATP-binding cassette, sub-family F (GCN20), member 1 [Source:ZFIN;Acc:ZDB-GENE-050517-31]	67	69	protein_coding	FALSE	FALSE
ENSDARG00000056479	rab1bb	7.20399	5.0365	3.79475	RAB1B, member RAS oncogene family b [Source:ZFIN;Acc:ZDB-GENE-040625-133]	0	0	protein_coding	FALSE	FALSE
ENSDARG00000059337	tgif1	7.20399	2.15532	0.445493	TGFB-induced factor homeobox 1 [Source:ZFIN;Acc:ZDB-GENE-030131-475]	62	64	protein_coding	FALSE	FALSE
ENSDARG00000061052	nipblb	7.20399	2.03128	0.210507	nipped-B homolog b (Drosophila) [Source:ZFIN;Acc:ZDB-GENE-030131-6070]	66	66	protein_coding	FALSE	FALSE
ENSDARG00000062954	clk2a	7.20399	1.62552	0	CDC-like kinase 2a [Source:ZFIN;Acc:ZDB-GENE-030131-298]	72	72	protein_coding	FALSE	FALSE
ENSDARG00000070674	psmd6	7.20399	1.87478	0	proteasome 26S subunit, non-ATPase 6 [Source:ZFIN;Acc:ZDB-GENE-040426-1038]	92	93	protein_coding	FALSE	FALSE
ENSDARG00000075569	gpbp1l1	7.20399	2.38463	0.792348	GC-rich promoter binding protein 1-like 1 [Source:ZFIN;Acc:ZDB-GENE-031118-220]	58	58	protein_coding	FALSE	FALSE
ENSDARG00000078164	znf576.2	7.20399	3.40439	2.02614	zinc finger protein 576, tandem duplicate 2 [Source:ZFIN;Acc:ZDB-GENE-030131-1738]	0	19	protein_coding	FALSE	FALSE
ENSDARG00000087954	rac1b	7.20399	1.82633	0	ras-related C3 botulinum toxin substrate 1b (rho family, small GTP binding protein Rac1) [Source:ZFIN;Acc:ZDB-GENE-060312-45]	0	0	protein_coding	FALSE	FALSE
ENSDARG00000093456	si.dkey.71p21.9	7.20399	2.17013	0.470783	si:dkey-71p21.9 [Source:ZFIN;Acc:ZDB-GENE-030131-2500]	0	0	lincRNA	NA	NA
ENSDARG00000099449	CR762398.1	7.20399	3.19627	1.79337		0	0	protein_coding	FALSE	FALSE
ENSDARG00000099532	ubl3a	7.20399	4.33715	2.99525	ubiquitin-like 3a [Source:ZFIN;Acc:ZDB-GENE-030131-3431]	92	93	protein_coding	FALSE	FALSE
ENSDARG00000099888	snn	7.20399	3.63945	2.26901	stannin [Source:ZFIN;Acc:ZDB-GENE-040426-1987]	86	89	protein_coding	TRUE	FALSE
ENSDARG00000101212	CU681841.1	7.20399	3.70479	2.33974		0	0	protein_coding	TRUE	FALSE
ENSDARG00000101627	ssr1	7.20399	3.1838	1.77875	signal sequence receptor, alpha [Source:ZFIN;Acc:ZDB-GENE-030826-28]	74	75	protein_coding	TRUE	TRUE
ENSDARG00000102147	fem1c	7.20399	2.69261	1.20356	fem-1 homolog c (C. elegans) [Source:ZFIN;Acc:ZDB-GENE-031008-3]	64	65	protein_coding	FALSE	FALSE
ENSDARG00000103032	rap2b	7.20399	1.74843	0	RAP2B, member of RAS oncogene family [Source:ZFIN;Acc:ZDB-GENE-040426-2818]	96	96	protein_coding	FALSE	FALSE
ENSDARG00000003205	ngly1	7.1736	2.39925	0.811125	N-glycanase 1 [Source:ZFIN;Acc:ZDB-GENE-050522-535]	56	57	protein_coding	FALSE	FALSE
ENSDARG00000005980	sfswap	7.1736	3.09492	1.68562	splicing factor, suppressor of white-apricot family [Source:ZFIN;Acc:ZDB-GENE-040426-931]	58	59	protein_coding	FALSE	FALSE
ENSDARG00000007241	mycb	7.1736	1.58132	0	v-myc avian myelocytomatosis viral oncogene homolog b [Source:ZFIN;Acc:ZDB-GENE-040426-780]	60	60	protein_coding	FALSE	FALSE
ENSDARG00000008976	mdn1	7.1736	2.61261	1.10164	midasin AAA ATPase 1 [Source:ZFIN;Acc:ZDB-GENE-041001-138]	55	56	protein_coding	FALSE	FALSE
ENSDARG00000010655	ppm1k	7.1736	4.02363	2.68011	protein phosphatase, Mg2+/Mn2+ dependent, 1K [Source:ZFIN;Acc:ZDB-GENE-050306-8]	66	67	protein_coding	FALSE	FALSE
ENSDARG00000010831	churc1	7.1736	2.88058	1.43601	churchill domain containing 1 [Source:ZFIN;Acc:ZDB-GENE-041001-150]	69	69	protein_coding	FALSE	FALSE
ENSDARG00000011597	atxn2l	7.1736	4.17081	2.82484	ataxin 2-like [Source:ZFIN;Acc:ZDB-GENE-030131-3246]	42	41	protein_coding	FALSE	FALSE
ENSDARG00000012848	arih2	7.1736	2.27139	0.627494	ariadne homolog 2 (Drosophila) [Source:ZFIN;Acc:ZDB-GENE-040426-2158]	81	81	protein_coding	FALSE	FALSE
ENSDARG00000013561	pgm1	7.1736	6.49952	5.41831	phosphoglucomutase 1 [Source:ZFIN;Acc:ZDB-GENE-040426-1245]	0	0	protein_coding	FALSE	FALSE
ENSDARG00000018257	ncoa1	7.1736	3.20601	1.80172	nuclear receptor coactivator 1 [Source:ZFIN;Acc:ZDB-GENE-041001-175]	43	46	protein_coding	FALSE	FALSE
ENSDARG00000021855	arnt	7.1736	2.35012	0.745847	aryl hydrocarbon receptor nuclear translocator [Source:ZFIN;Acc:ZDB-GENE-060126-7]	57	58	protein_coding	FALSE	FALSE
ENSDARG00000035330	taf1	7.1736	3.12756	1.72112	TAF1 RNA polymerase II, TATA box binding protein (TBP)-associated factor [Source:ZFIN;Acc:ZDB-GENE-030131-5576]	75	76	protein_coding	FALSE	FALSE
ENSDARG00000036479	si.dkeyp.80c12.4	7.1736	3.77922	2.42065	si:dkeyp-80c12.4 [Source:ZFIN;Acc:ZDB-GENE-090313-403]	0	0	protein_coding	FALSE	TRUE
ENSDARG00000039578	pa2g4a	7.1736	2.66962	1.17801	proliferation-associated 2G4, a [Source:ZFIN;Acc:ZDB-GENE-030616-161]	74	74	protein_coding	FALSE	FALSE
ENSDARG00000040230	TRIM35..1.to.many..7	7.1736	2.60912	1.09695	si:dkey-37m8.11 [Source:ZFIN;Acc:ZDB-GENE-120214-18]	32	35	protein_coding	FALSE	FALSE
ENSDARG00000041581	znf143b	7.1736	2.18615	0.495499	zinc finger protein 143b [Source:ZFIN;Acc:ZDB-GENE-040426-1586]	69	70	protein_coding	FALSE	FALSE
ENSDARG00000042856	itpka	7.1736	1.9356	0.0268163	inositol-trisphosphate 3-kinase A [Source:ZFIN;Acc:ZDB-GENE-030616-116]	49	50	protein_coding	FALSE	FALSE
ENSDARG00000042969	znf1035	7.1736	1.73112	0	zinc finger protein 1035 [Source:ZFIN;Acc:ZDB-GENE-050309-241]	0	0	protein_coding	FALSE	FALSE
ENSDARG00000045542	LAMTOR4	7.1736	3.97409	2.62458	si:dkey-159a18.7 [Source:ZFIN;Acc:ZDB-GENE-030131-7438]	65	66	protein_coding	FALSE	FALSE
ENSDARG00000071361	si.ch211.197g15.10	7.1736	3.66174	2.29345	si:ch211-197g15.10 [Source:ZFIN;Acc:ZDB-GENE-050208-617]	0	0	protein_coding	FALSE	FALSE
ENSDARG00000071543	SHISA4..1.to.many..1	7.1736	4.71729	3.4074	si:dkey-42i9.7 [Source:ZFIN;Acc:ZDB-GENE-050208-731]	25	27	protein_coding	TRUE	TRUE
ENSDARG00000074023	rbms1a	7.1736	3.70149	2.33805	RNA binding motif, single stranded interacting protein 1a [Source:ZFIN;Acc:ZDB-GENE-030131-4967]	71	71	protein_coding	FALSE	FALSE
ENSDARG00000092503	arid1b	7.1736	2.90771	1.46253	AT rich interactive domain 1B (SWI1-like) [Source:ZFIN;Acc:ZDB-GENE-030131-4459]	56	54	protein_coding	FALSE	FALSE
ENSDARG00000093503	rsf1b.1	7.1736	3.01712	1.59564	remodeling and spacing factor 1b, tandem duplicate 1 [Source:ZFIN;Acc:ZDB-GENE-030131-5829]	39	39	protein_coding	FALSE	FALSE
ENSDARG00000093945	vma21	7.1736	2.82681	1.3735	VMA21 vacuolar H+-ATPase homolog (S. cerevisiae) [Source:ZFIN;Acc:ZDB-GENE-081104-272]	63	67	protein_coding	TRUE	FALSE
ENSDARG00000098688	CABZ01101739.1	7.1736	3.10693	1.70003		0	0	protein_coding	TRUE	FALSE
ENSDARG00000099996	rhot1a	7.1736	2.11608	0.370166	ras homolog family member T1a [Source:ZFIN;Acc:ZDB-GENE-030131-5354]	85	86	protein_coding	TRUE	FALSE
ENSDARG00000101982	spryd3	7.1736	1.94516	0.0458401	SPRY domain containing 3 [Source:ZFIN;Acc:ZDB-GENE-070928-22]	76	76	protein_coding	FALSE	FALSE
ENSDARG00000102055	hadhb	7.1736	3.44175	2.06262	hydroxyacyl-CoA dehydrogenase/3-ketoacyl-CoA thiolase/enoyl-CoA hydratase (trifunctional protein), beta subunit [Source:ZFIN;Acc:ZDB-GENE-030131-8550]	0	0	processed_transcript	NA	NA
ENSDARG00000102307	taf2	7.1736	3.17197	1.7652	TAF2 RNA polymerase II, TATA box binding protein (TBP)-associated factor [Source:ZFIN;Acc:ZDB-GENE-030131-3207]	82	82	protein_coding	FALSE	FALSE
ENSDARG00000006052	malt1a	7.1432	3.36257	1.97447	MALT1 paracaspase a [Source:ZFIN;Acc:ZDB-GENE-020801-2]	0	0	protein_coding	FALSE	FALSE
ENSDARG00000012591	pdcd10b	7.1432	4.84004	3.5471	programmed cell death 10b [Source:ZFIN;Acc:ZDB-GENE-040426-2607]	93	93	protein_coding	FALSE	FALSE
ENSDARG00000015681	gsk3ab	7.1432	3.34377	1.9553	glycogen synthase kinase 3 alpha b [Source:ZFIN;Acc:ZDB-GENE-990714-3]	79	33	protein_coding	FALSE	FALSE
ENSDARG00000020009	bmp2k	7.1432	2.27277	0.629331	BMP2 inducible kinase [Source:ZFIN;Acc:ZDB-GENE-041212-72]	55	56	protein_coding	FALSE	FALSE
ENSDARG00000022623	fbxo44	7.1432	2.81889	1.36268	F-box protein 44 [Source:ZFIN;Acc:ZDB-GENE-041212-85]	36	36	protein_coding	FALSE	FALSE
ENSDARG00000029072	klf6a	7.1432	3.03852	1.62081	Kruppel-like factor 6a [Source:ZFIN;Acc:ZDB-GENE-021115-9]	76	76	protein_coding	FALSE	FALSE
ENSDARG00000030949	srprb	7.1432	2.19277	0.5061	signal recognition particle receptor, B subunit [Source:ZFIN;Acc:ZDB-GENE-040718-311]	56	56	protein_coding	TRUE	FALSE
ENSDARG00000033973	mrps23	7.1432	4.04103	2.69429	mitochondrial ribosomal protein S23 [Source:ZFIN;Acc:ZDB-GENE-040801-134]	45	45	protein_coding	FALSE	FALSE
ENSDARG00000037229	denr	7.1432	2.38405	0.791777	density-regulated protein [Source:ZFIN;Acc:ZDB-GENE-040718-450]	75	75	protein_coding	FALSE	FALSE
ENSDARG00000041450	rab11a	7.1432	2.27365	0.630039	RAB11a, member RAS oncogene family [Source:ZFIN;Acc:ZDB-GENE-041114-53]	96	96	protein_coding	FALSE	FALSE
ENSDARG00000054154	bms1	7.1432	2.84133	1.39176	BMS1 ribosome biogenesis factor [Source:ZFIN;Acc:ZDB-GENE-060720-2]	64	65	protein_coding	FALSE	FALSE
ENSDARG00000055719	ino80c	7.1432	2.91455	1.47023	INO80 complex subunit C [Source:ZFIN;Acc:ZDB-GENE-040625-97]	56	56	protein_coding	FALSE	FALSE
ENSDARG00000057672	plpp5	7.1432	2.2311	0.567957	phospholipid phosphatase 5 [Source:ZFIN;Acc:ZDB-GENE-040704-54]	47	47	protein_coding	TRUE	TRUE
ENSDARG00000059303	hnrnpl2	7.1432	1.56927	0	heterogeneous nuclear ribonucleoprotein L2 [Source:ZFIN;Acc:ZDB-GENE-040426-2707]	75	28	protein_coding	FALSE	FALSE
ENSDARG00000061314	ngrn	7.1432	1.68927	0	neugrin, neurite outgrowth associated [Source:ZFIN;Acc:ZDB-GENE-060503-19]	29	31	protein_coding	FALSE	FALSE
ENSDARG00000061732	raph1b	7.1432	4.1334	2.78592	Ras association (RalGDS/AF-6) and pleckstrin homology domains 1b [Source:ZFIN;Acc:ZDB-GENE-090311-54]	50	50	protein_coding	FALSE	FALSE
ENSDARG00000073841	herc2	7.1432	2.72919	1.25086	HECT and RLD domain containing E3 ubiquitin protein ligase 2 [Source:ZFIN;Acc:ZDB-GENE-070718-6]	82	83	protein_coding	FALSE	FALSE
ENSDARG00000074453	zfx	7.1432	2.88772	1.44299	zinc finger protein, X-linked [Source:ZFIN;Acc:ZDB-GENE-061220-2]	59	54	protein_coding	FALSE	FALSE
ENSDARG00000075048	lonrf1	7.1432	2.3141	0.692133	LON peptidase N-terminal domain and ring finger 1 [Source:ZFIN;Acc:ZDB-GENE-101021-4]	0	0	protein_coding	FALSE	FALSE
ENSDARG00000075180	tmem14ca	7.1432	2.07844	0.30653	transmembrane protein 14Ca [Source:ZFIN;Acc:ZDB-GENE-060825-156]	70	54	protein_coding	TRUE	FALSE
ENSDARG00000075446	naa25	7.1432	3.61881	2.24635	N(alpha)-acetyltransferase 25, NatB auxiliary subunit [Source:ZFIN;Acc:ZDB-GENE-041111-190]	69	71	protein_coding	FALSE	FALSE
ENSDARG00000076747	TMCC1..1.to.many.	7.1432	2.0173	0.184318	transmembrane and coiled-coil domain family 1 [Source:HGNC Symbol;Acc:HGNC:29116]	61	61	protein_coding	TRUE	FALSE
ENSDARG00000089355	CSDE1	7.1432	2.42658	0.847784	si:dkeyp-121d4.3 [Source:ZFIN;Acc:ZDB-GENE-130530-962]	0	0	protein_coding	FALSE	FALSE
ENSDARG00000092798	ppib	7.1432	2.70159	1.21589	peptidylprolyl isomerase B (cyclophilin B) [Source:ZFIN;Acc:ZDB-GENE-040426-1955]	83	82	protein_coding	TRUE	TRUE
ENSDARG00000098610	si.dkey.8o9.2	7.1432	2.10098	0.346615	si:dkey-8o9.2 [Source:ZFIN;Acc:ZDB-GENE-081103-17]	0	0	protein_coding	FALSE	FALSE
ENSDARG00000098670	MAP4K4	7.1432	1.80992	0	si:zfos-433a6.1 [Source:ZFIN;Acc:ZDB-GENE-030131-6722]	72	73	protein_coding	FALSE	FALSE
ENSDARG00000101071	si.dkeyp.80d11.14	7.1432	1.59663	0	si:dkeyp-80d11.14 [Source:ZFIN;Acc:ZDB-GENE-110914-120]	0	0	protein_coding	FALSE	FALSE
ENSDARG00000102417	psmd7	7.1432	2.10332	0.350962	proteasome 26S subunit, non-ATPase 7 [Source:ZFIN;Acc:ZDB-GENE-030131-5541]	92	92	protein_coding	FALSE	FALSE
ENSDARG00000102874	immt	7.1432	3.98254	2.63345	inner membrane protein, mitochondrial (mitofilin) [Source:ZFIN;Acc:ZDB-GENE-030131-5417]	58	59	protein_coding	FALSE	FALSE
ENSDARG00000104148	crebbpb	7.1432	2.45463	0.885745	CREB binding protein b [Source:ZFIN;Acc:ZDB-GENE-050302-102]	65	66	protein_coding	FALSE	FALSE
ENSDARG00000001162	matr3l1.1	7.1128	2.38089	0.788004	matrin 3-like 1.1 [Source:ZFIN;Acc:ZDB-GENE-030616-40]	5	6	protein_coding	FALSE	FALSE
ENSDARG00000001803	kcnh6a	7.1128	4.21859	2.86841	potassium voltage-gated channel, subfamily H (eag-related), member 6a [Source:ZFIN;Acc:ZDB-GENE-040702-5]	51	52	protein_coding	TRUE	FALSE
ENSDARG00000002591	ruvbl1	7.1128	3.86561	2.50165	RuvB-like AAA ATPase 1 [Source:ZFIN;Acc:ZDB-GENE-030109-2]	11	92	protein_coding	FALSE	FALSE
ENSDARG00000003961	parp3	7.1128	3.51524	2.13071	poly (ADP-ribose) polymerase family, member 3 [Source:ZFIN;Acc:ZDB-GENE-030131-7435]	54	53	protein_coding	FALSE	FALSE
ENSDARG00000005468	irf2bp1	7.1128	3.31895	1.93209	interferon regulatory factor 2 binding protein 1 [Source:ZFIN;Acc:ZDB-GENE-050420-389]	49	49	protein_coding	FALSE	FALSE
ENSDARG00000008218	znf410	7.1128	2.98853	1.56472	zinc finger protein 410 [Source:ZFIN;Acc:ZDB-GENE-040426-1817]	56	56	protein_coding	FALSE	FALSE
ENSDARG00000010059	itpkb	7.1128	1.9639	0.0842118	inositol-trisphosphate 3-kinase B [Source:ZFIN;Acc:ZDB-GENE-041014-166]	47	48	protein_coding	FALSE	FALSE
ENSDARG00000012747	rer1	7.1128	2.43711	0.864505	retention in endoplasmic reticulum sorting receptor 1 [Source:ZFIN;Acc:ZDB-GENE-040426-1494]	84	84	protein_coding	TRUE	FALSE
ENSDARG00000016753	ipo9	7.1128	3.05665	1.64444	importin 9 [Source:ZFIN;Acc:ZDB-GENE-040426-2953]	84	85	protein_coding	FALSE	FALSE
ENSDARG00000018904	cstf3	7.1128	1.74503	0	cleavage stimulation factor, 3' pre-RNA, subunit 3 [Source:ZFIN;Acc:ZDB-GENE-040426-1997]	86	86	protein_coding	FALSE	FALSE
ENSDARG00000019572	taf7	7.1128	4.63984	3.33169	TAF7 RNA polymerase II, TATA box binding protein (TBP)-associated factor [Source:ZFIN;Acc:ZDB-GENE-020419-18]	67	70	protein_coding	FALSE	FALSE
ENSDARG00000021905	derl1	7.1128	2.40291	0.815212	derlin 1 [Source:ZFIN;Acc:ZDB-GENE-040426-2793]	82	83	protein_coding	TRUE	FALSE
ENSDARG00000024693	lysmd3	7.1128	3.3307	1.94511	LysM, putative peptidoglycan-binding, domain containing 3 [Source:ZFIN;Acc:ZDB-GENE-040625-88]	44	46	protein_coding	TRUE	FALSE
ENSDARG00000034825	uspl1	7.1128	3.1176	1.71084	ubiquitin specific peptidase like 1 [Source:ZFIN;Acc:ZDB-GENE-040930-7]	23	24	protein_coding	FALSE	FALSE
ENSDARG00000039931	slc25a33	7.1128	4.63935	3.33169	solute carrier family 25 (pyrimidine nucleotide carrier), member 33 [Source:ZFIN;Acc:ZDB-GENE-040426-2183]	76	76	protein_coding	TRUE	FALSE
ENSDARG00000040503	CABZ01070258.1	7.1128	3.81773	2.45273		0	0	protein_coding	FALSE	FALSE
ENSDARG00000045017	pdrg1	7.1128	5.05316	3.81148	p53 and DNA-damage regulated 1 [Source:ZFIN;Acc:ZDB-GENE-050417-276]	60	58	protein_coding	FALSE	FALSE
ENSDARG00000052746	grinab	7.1128	2.87363	1.42931	glutamate receptor, ionotropic, N-methyl D-aspartate-associated protein 1b (glutamate binding) [Source:ZFIN;Acc:ZDB-GENE-040426-1367]	52	54	protein_coding	TRUE	FALSE
ENSDARG00000054777	si.dkey.46a10.3	7.1128	1.65073	0	si:dkey-46a10.3 [Source:ZFIN;Acc:ZDB-GENE-030131-4610]	47	46	protein_coding	FALSE	FALSE
ENSDARG00000056259	tmem131	7.1128	2.81868	1.36268	transmembrane protein 131 [Source:ZFIN;Acc:ZDB-GENE-130530-662]	59	60	protein_coding	TRUE	TRUE
ENSDARG00000059646	nt5dc2	7.1128	3.24231	1.83861	5'-nucleotidase domain containing 2 [Source:ZFIN;Acc:ZDB-GENE-060810-17]	49	62	protein_coding	FALSE	FALSE
ENSDARG00000060469	pik3r4	7.1128	3.44471	2.06417	phosphoinositide-3-kinase, regulatory subunit 4 [Source:ZFIN;Acc:ZDB-GENE-050309-84]	82	84	protein_coding	FALSE	FALSE
ENSDARG00000060586	ctdspl2b	7.1128	2.79288	1.32637	CTD (carboxy-terminal domain, RNA polymerase II, polypeptide A) small phosphatase like 2b [Source:ZFIN;Acc:ZDB-GENE-030131-1809]	70	71	protein_coding	FALSE	FALSE
ENSDARG00000063242	ttc13	7.1128	2.62996	1.12611	tetratricopeptide repeat domain 13 [Source:ZFIN;Acc:ZDB-GENE-080722-25]	63	77	protein_coding	TRUE	TRUE
ENSDARG00000069342	KLF14	7.1128	3.27471	1.88004	zgc:153115 [Source:ZFIN;Acc:ZDB-GENE-061013-418]	0	0	protein_coding	FALSE	FALSE
ENSDARG00000070867	smx5	7.1128	4.05928	2.71437	smx5 [Source:ZFIN;Acc:ZDB-GENE-000616-10]	98	99	protein_coding	FALSE	FALSE
ENSDARG00000071468	mrpl54	7.1128	2.6817	1.18965	mitochondrial ribosomal protein L54 [Source:ZFIN;Acc:ZDB-GENE-050208-381]	49	45	protein_coding	FALSE	FALSE
ENSDARG00000075530	pigu	7.1128	3.34375	1.9553	phosphatidylinositol glycan anchor biosynthesis, class U [Source:ZFIN;Acc:ZDB-GENE-100629-1]	76	76	protein_coding	TRUE	TRUE
ENSDARG00000076066	2006-03-01	7.1128	2.44492	0.872648	membrane-associated ring finger (C3HC4) 6 [Source:ZFIN;Acc:ZDB-GENE-070912-530]	87	88	protein_coding	TRUE	FALSE
ENSDARG00000078620	si.dkey.156m2.3	7.1128	1.85477	0	si:dkey-156m2.3 [Source:ZFIN;Acc:ZDB-GENE-121213-8]	0	0	protein_coding	FALSE	FALSE
ENSDARG00000079686	naa30	7.1128	2.38473	0.792348	N(alpha)-acetyltransferase 30, NatC catalytic subunit [Source:ZFIN;Acc:ZDB-GENE-081022-73]	49	50	protein_coding	FALSE	FALSE
ENSDARG00000090194	lamtor5	7.1128	2.27661	0.635135	late endosomal/lysosomal adaptor, MAPK and MTOR activator 5 [Source:ZFIN;Acc:ZDB-GENE-110411-193]	75	74	protein_coding	FALSE	FALSE
ENSDARG00000092112	tomm40	7.1128	2.42194	0.840667	translocase of outer mitochondrial membrane 40 homolog (yeast) [Source:ZFIN;Acc:ZDB-GENE-030131-1365]	72	73	protein_coding	FALSE	TRUE
ENSDARG00000098453	pank4	7.1128	1.56386	0	pantothenate kinase 4 [Source:ZFIN;Acc:ZDB-GENE-040426-1592]	83	83	protein_coding	FALSE	FALSE
ENSDARG00000098946	pald1a	7.1128	2.64388	1.14596	phosphatase domain containing, paladin 1a [Source:ZFIN;Acc:ZDB-GENE-030804-26]	51	51	protein_coding	TRUE	FALSE
ENSDARG00000099841	PRKCA..1.to.many.	7.1128	3.73763	2.37298	si:ch73-374l24.1 [Source:ZFIN;Acc:ZDB-GENE-141216-6]	85	85	protein_coding	FALSE	FALSE
ENSDARG00000101680	arl1	7.1128	1.63766	0	ADP-ribosylation factor-like 1 [Source:ZFIN;Acc:ZDB-GENE-040718-175]	96	94	protein_coding	FALSE	FALSE
ENSDARG00000101840	U3.21	7.1128	2.61377	1.10257	Small nucleolar RNA U3 [Source:RFAM;Acc:RF00012]	0	0	snoRNA	NA	NA
ENSDARG00000102018	btr25	7.1128	2.37626	0.782487	bloodthirsty-related gene family, member 25 [Source:ZFIN;Acc:ZDB-GENE-070705-377]	17	28	protein_coding	FALSE	FALSE
ENSDARG00000103388	znf609a	7.1128	5.77601	4.6295	zinc finger protein 609a [Source:ZFIN;Acc:ZDB-GENE-030131-6219]	58	59	protein_coding	FALSE	FALSE
ENSDARG00000105119	si.ch211.258f1.3	7.1128	3.06754	1.65661	si:ch211-258f1.3 [Source:ZFIN;Acc:ZDB-GENE-070912-252]	8	7	protein_coding	FALSE	FALSE
ENSDARG00000002385	atm	7.08241	3.77306	2.41387	ATM serine/threonine kinase [Source:ZFIN;Acc:ZDB-GENE-040809-1]	53	54	protein_coding	FALSE	FALSE
ENSDARG00000003308	emc2	7.08241	2.59168	1.07447	ER membrane protein complex subunit 2 [Source:ZFIN;Acc:ZDB-GENE-040625-82]	84	85	protein_coding	FALSE	FALSE
ENSDARG00000008184	mia3	7.08241	2.36501	0.76762	melanoma inhibitory activity family, member 3 [Source:ZFIN;Acc:ZDB-GENE-041014-270]	10	20	protein_coding	FALSE	TRUE
ENSDARG00000011493	DCUN1D3	7.08241	1.93404	0.0255838	zgc:154015 [Source:ZFIN;Acc:ZDB-GENE-070928-2]	64	64	protein_coding	FALSE	FALSE
ENSDARG00000012314	usp25	7.08241	2.32536	0.710725	ubiquitin specific peptidase 25 [Source:ZFIN;Acc:ZDB-GENE-040426-2847]	69	75	protein_coding	FALSE	FALSE
ENSDARG00000012588	ptdss1a	7.08241	1.79523	0	phosphatidylserine synthase 1a [Source:ZFIN;Acc:ZDB-GENE-040426-837]	78	78	protein_coding	TRUE	FALSE
ENSDARG00000016496	cdk8	7.08241	3.46723	2.08729	cyclin-dependent kinase 8 [Source:ZFIN;Acc:ZDB-GENE-030903-2]	96	96	protein_coding	FALSE	FALSE
ENSDARG00000020469	map3k7	7.08241	2.56539	1.03878	mitogen-activated protein kinase kinase kinase 7 [Source:ZFIN;Acc:ZDB-GENE-041001-135]	78	78	protein_coding	FALSE	TRUE
ENSDARG00000036282	rnaset2	7.08241	1.54879	0	ribonuclease T2 [Source:ZFIN;Acc:ZDB-GENE-030131-2513]	44	43	protein_coding	FALSE	TRUE
ENSDARG00000037038	psmc6	7.08241	2.86232	1.41176	proteasome 26S subunit, ATPase 6 [Source:ZFIN;Acc:ZDB-GENE-030131-304]	97	97	protein_coding	FALSE	FALSE
ENSDARG00000040971	GABARAPL1	7.08241	4.41044	3.07052	zgc:92606 [Source:ZFIN;Acc:ZDB-GENE-040718-462]	59	59	protein_coding	FALSE	FALSE
ENSDARG00000045200	dusp19b	7.08241	2.27913	0.639287	dual specificity phosphatase 19b [Source:ZFIN;Acc:ZDB-GENE-040502-1]	61	61	protein_coding	FALSE	FALSE
ENSDARG00000052091	rbpjb	7.08241	2.84998	1.40116	recombination signal binding protein for immunoglobulin kappa J region b [Source:ZFIN;Acc:ZDB-GENE-070319-1]	89	89	protein_coding	FALSE	FALSE
ENSDARG00000053713	ccdc88c	7.08241	3.80287	2.44039	coiled-coil domain containing 88C [Source:ZFIN;Acc:ZDB-GENE-100419-3]	51	54	protein_coding	FALSE	FALSE
ENSDARG00000054320	ap2a1	7.08241	2.56285	1.03466	adaptor-related protein complex 2, alpha 1 subunit [Source:ZFIN;Acc:ZDB-GENE-090302-2]	84	85	protein_coding	TRUE	FALSE
ENSDARG00000057089	ftsj1	7.08241	4.06094	2.71437	FtsJ RNA methyltransferase homolog 1 (E. coli) [Source:ZFIN;Acc:ZDB-GENE-041114-83]	67	66	protein_coding	FALSE	FALSE
ENSDARG00000058801	rev3l	7.08241	3.73465	2.37097	REV3-like, polymerase (DNA directed), zeta, catalytic subunit [Source:ZFIN;Acc:ZDB-GENE-050302-55]	47	48	protein_coding	FALSE	TRUE
ENSDARG00000062430	gpd2	7.08241	1.80668	0	glycerol-3-phosphate dehydrogenase 2 (mitochondrial) [Source:ZFIN;Acc:ZDB-GENE-030131-4869]	80	79	protein_coding	FALSE	FALSE
ENSDARG00000069527	ube2g1b	7.08241	1.57995	0	ubiquitin-conjugating enzyme E2G 1b (UBC7 homolog, yeast) [Source:ZFIN;Acc:ZDB-GENE-040426-2939]	0	0	protein_coding	FALSE	FALSE
ENSDARG00000073845	zgc.110843	7.08241	3.21619	1.81205	zgc:110843 [Source:ZFIN;Acc:ZDB-GENE-050327-15]	0	0	protein_coding	TRUE	FALSE
ENSDARG00000091079	MALSU1	7.08241	3.62573	2.25466	si:zfos-1192g2.3 [Source:ZFIN;Acc:ZDB-GENE-030131-4956]	39	41	protein_coding	FALSE	FALSE
ENSDARG00000096287	si.ch211.76l23.6	7.08241	3.31364	1.92562	si:ch211-76l23.6 [Source:ZFIN;Acc:ZDB-GENE-120215-113]	0	0	lincRNA	NA	NA
ENSDARG00000097611	si.ch73.304f21.2	7.08241	1.85091	0	si:ch73-304f21.2 [Source:ZFIN;Acc:ZDB-GENE-131121-370]	0	0	processed_transcript	NA	NA
ENSDARG00000098972	mrps16	7.08241	3.35781	1.97179	mitochondrial ribosomal protein S16 [Source:ZFIN;Acc:ZDB-GENE-041010-123]	64	65	protein_coding	FALSE	FALSE
ENSDARG00000100553	lsm14ab	7.08241	1.76391	0	LSM14A mRNA processing body assembly factor b [Source:ZFIN;Acc:ZDB-GENE-040426-2462]	62	62	protein_coding	FALSE	FALSE
ENSDARG00000102367	ndfip1l	7.08241	3.952	2.60268	Nedd4 family interacting protein 1, like [Source:ZFIN;Acc:ZDB-GENE-040718-207]	78	77	protein_coding	TRUE	FALSE
ENSDARG00000103740	fundc2	7.08241	1.98973	0.137778	fun14 domain containing 2 [Source:ZFIN;Acc:ZDB-GENE-041010-26]	59	63	protein_coding	FALSE	FALSE
ENSDARG00000105407	si.dkey.23a13.13	7.08241	3.98769	2.63819	si:dkey-23a13.13 [Source:ZFIN;Acc:ZDB-GENE-160113-1]	NA	NA	lincRNA	NA	NA
ENSDARG00000002790	ap2m1a	7.05201	1.87079	0	adaptor-related protein complex 2, mu 1 subunit, a [Source:ZFIN;Acc:ZDB-GENE-030131-9784]	96	96	protein_coding	FALSE	FALSE
ENSDARG00000003941	rrs1	7.05201	3.55786	2.1826	RRS1 ribosome biogenesis regulator homolog (S. cerevisiae) [Source:ZFIN;Acc:ZDB-GENE-030131-9345]	62	63	protein_coding	FALSE	FALSE
ENSDARG00000009214	mfsd13a	7.05201	2.65804	1.16339	major facilitator superfamily domain containing 13A [Source:ZFIN;Acc:ZDB-GENE-041212-83]	68	69	protein_coding	TRUE	FALSE
ENSDARG00000014794	uqcrc2a	7.05201	3.40263	2.02512	ubiquinol-cytochrome c reductase core protein IIa [Source:ZFIN;Acc:ZDB-GENE-040718-405]	54	56	protein_coding	FALSE	FALSE
ENSDARG00000017803	gsk3b	7.05201	2.96567	1.53494	glycogen synthase kinase 3 beta [Source:ZFIN;Acc:ZDB-GENE-990714-4]	94	95	protein_coding	FALSE	FALSE
ENSDARG00000019326	prpsap2	7.05201	4.23082	2.88003	phosphoribosyl pyrophosphate synthetase-associated protein 2 [Source:ZFIN;Acc:ZDB-GENE-040426-2077]	93	92	protein_coding	FALSE	FALSE
ENSDARG00000022232	ppan	7.05201	3.55381	2.17843	peter pan homolog (Drosophila) [Source:ZFIN;Acc:ZDB-GENE-030114-4]	51	50	protein_coding	FALSE	FALSE
ENSDARG00000028295	mkrn4	7.05201	3.73775	2.37298	makorin, ring finger protein, 4 [Source:ZFIN;Acc:ZDB-GENE-030131-5954]	0	0	protein_coding	FALSE	FALSE
ENSDARG00000036106	rgs18	7.05201	1.91269	0	regulator of G-protein signaling 18 [Source:ZFIN;Acc:ZDB-GENE-061013-722]	48	48	protein_coding	FALSE	FALSE
ENSDARG00000037517	slc35c2	7.05201	2.50536	0.955167	solute carrier family 35 (GDP-fucose transporter), member C2 [Source:ZFIN;Acc:ZDB-GENE-030131-2202]	29	29	protein_coding	TRUE	FALSE
ENSDARG00000037855	taf11	7.05201	3.11377	1.70734	TAF11 RNA polymerase II, TATA box binding protein (TBP)-associated factor [Source:ZFIN;Acc:ZDB-GENE-040718-283]	63	62	protein_coding	FALSE	FALSE
ENSDARG00000038290	thoc5	7.05201	2.22043	0.551753	THO complex 5 [Source:ZFIN;Acc:ZDB-GENE-030131-3789]	69	69	protein_coding	FALSE	FALSE
ENSDARG00000038787	tmub1	7.05201	3.4992	2.11671	transmembrane and ubiquitin-like domain containing 1 [Source:ZFIN;Acc:ZDB-GENE-040426-2504]	40	40	protein_coding	TRUE	FALSE
ENSDARG00000043857	ufm1	7.05201	3.00248	1.57926	ubiquitin-fold modifier 1 [Source:ZFIN;Acc:ZDB-GENE-040426-2930]	91	73	protein_coding	FALSE	FALSE
ENSDARG00000045978	chchd6b	7.05201	2.62577	1.1196	coiled-coil-helix-coiled-coil-helix domain containing 6b [Source:ZFIN;Acc:ZDB-GENE-041114-95]	34	35	protein_coding	FALSE	FALSE
ENSDARG00000052747	gpatch3	7.05201	3.16926	1.76383	G patch domain containing 3 [Source:ZFIN;Acc:ZDB-GENE-070112-902]	42	41	protein_coding	FALSE	FALSE
ENSDARG00000054980	ebna1bp2	7.05201	1.86126	0	EBNA1 binding protein 2 [Source:ZFIN;Acc:ZDB-GENE-030131-6989]	58	58	protein_coding	FALSE	FALSE
ENSDARG00000055064	prdx5	7.05201	1.65086	0	peroxiredoxin 5 [Source:ZFIN;Acc:ZDB-GENE-050522-159]	55	53	protein_coding	FALSE	FALSE
ENSDARG00000057708	PHTF1	7.05201	2.3999	0.811845	zgc:175264 [Source:ZFIN;Acc:ZDB-GENE-080204-123]	55	55	protein_coding	TRUE	FALSE
ENSDARG00000069066	nufip2	7.05201	4.38529	3.0472	nuclear fragile X mental retardation protein interacting protein 2 [Source:ZFIN;Acc:ZDB-GENE-041111-7]	44	44	protein_coding	FALSE	FALSE
ENSDARG00000075643	ifi35	7.05201	1.75673	0	interferon-induced protein 35 [Source:ZFIN;Acc:ZDB-GENE-100311-2]	26	26	protein_coding	FALSE	FALSE
ENSDARG00000096668	MZT1	7.05201	2.87772	1.43308	si:dkey-15d12.2 [Source:ZFIN;Acc:ZDB-GENE-090313-33]	53	55	protein_coding	TRUE	FALSE
ENSDARG00000099710	BX284696.1	7.05201	2.96957	1.53973		0	0	protein_coding	FALSE	FALSE
ENSDARG00000100219	si.dkey.264f17.1	7.05201	2.76184	1.29222	si:dkey-264f17.1 [Source:ZFIN;Acc:ZDB-GENE-110913-6]	0	0	protein_coding	FALSE	FALSE
ENSDARG00000102000	CABZ01080371.2	7.05201	2.46007	0.894183		0	0	protein_coding	FALSE	FALSE
ENSDARG00000103718	chmp5b	7.05201	2.17504	0.477676	charged multivesicular body protein 5b [Source:ZFIN;Acc:ZDB-GENE-040426-1374]	84	79	protein_coding	FALSE	FALSE
ENSDARG00000002190	chmp2bb	7.02161	4.66683	3.36	charged multivesicular body protein 2Bb [Source:ZFIN;Acc:ZDB-GENE-040426-2539]	82	83	protein_coding	FALSE	FALSE
ENSDARG00000007141	psmc3	7.02161	1.56728	0	proteasome 26S subunit, ATPase 3 [Source:ZFIN;Acc:ZDB-GENE-030131-666]	97	96	protein_coding	FALSE	FALSE
ENSDARG00000011783	stag2a	7.02161	2.58764	1.0688	stromal antigen 2a [Source:ZFIN;Acc:ZDB-GENE-030131-3432]	77	77	protein_coding	FALSE	FALSE
ENSDARG00000014474	yipf1	7.02161	2.98771	1.56413	Yip1 domain family, member 1 [Source:ZFIN;Acc:ZDB-GENE-040822-35]	54	53	protein_coding	TRUE	FALSE
ENSDARG00000015970	phip	7.02161	4.54063	3.22108	pleckstrin homology domain interacting protein [Source:ZFIN;Acc:ZDB-GENE-050208-261]	65	66	protein_coding	FALSE	FALSE
ENSDARG00000019601	col12a1b	7.02161	3.51337	2.1304	collagen, type XII, alpha 1b [Source:ZFIN;Acc:ZDB-GENE-120215-116]	51	51	protein_coding	FALSE	TRUE
ENSDARG00000021439	ncoa4	7.02161	3.16949	1.76383	nuclear receptor coactivator 4 [Source:ZFIN;Acc:ZDB-GENE-040426-689]	37	37	protein_coding	FALSE	FALSE
ENSDARG00000030560	helz	7.02161	2.127	0.390932	helicase with zinc finger [Source:ZFIN;Acc:ZDB-GENE-040426-2419]	63	63	protein_coding	FALSE	FALSE
ENSDARG00000030743	sptlc3	7.02161	3.76745	2.40788	serine palmitoyltransferase, long chain base subunit 3 [Source:ZFIN;Acc:ZDB-GENE-041210-281]	61	69	protein_coding	TRUE	FALSE
ENSDARG00000035152	ap2b1	7.02161	3.49797	2.116	adaptor-related protein complex 2, beta 1 subunit [Source:ZFIN;Acc:ZDB-GENE-030131-6564]	94	94	protein_coding	FALSE	FALSE
ENSDARG00000035719	arl5c	7.02161	3.02131	1.59981	ADP-ribosylation factor-like 5C [Source:ZFIN;Acc:ZDB-GENE-040426-1866]	70	65	protein_coding	FALSE	FALSE
ENSDARG00000036102	ctdsp2	7.02161	4.32762	2.9874	CTD (carboxy-terminal domain, RNA polymerase II, polypeptide A) small phosphatase 2 [Source:ZFIN;Acc:ZDB-GENE-030131-184]	73	75	protein_coding	FALSE	FALSE
ENSDARG00000040245	kpnb3	7.02161	3.43739	2.06117	karyopherin (importin) beta 3 [Source:ZFIN;Acc:ZDB-GENE-030424-2]	86	87	protein_coding	FALSE	FALSE
ENSDARG00000045359	tceb1b	7.02161	2.30498	0.679538	transcription elongation factor B (SIII), polypeptide 1b [Source:ZFIN;Acc:ZDB-GENE-040718-138]	99	99	protein_coding	FALSE	FALSE
ENSDARG00000052348	smarca5	7.02161	3.58278	2.20642	SWI/SNF related, matrix associated, actin dependent regulator of chromatin, subfamily a, member 5 [Source:ZFIN;Acc:ZDB-GENE-021125-1]	0	0	protein_coding	FALSE	FALSE
ENSDARG00000056167	hspe1	7.02161	3.14688	1.74257	heat shock 10 protein 1 [Source:ZFIN;Acc:ZDB-GENE-000906-2]	81	82	protein_coding	FALSE	FALSE
ENSDARG00000057805	mrpl28	7.02161	2.77825	1.31148	mitochondrial ribosomal protein L28 [Source:ZFIN;Acc:ZDB-GENE-050522-113]	67	67	protein_coding	FALSE	FALSE
ENSDARG00000058306	prpf18	7.02161	2.15149	0.440935	PRP18 pre-mRNA processing factor 18 homolog (yeast) [Source:ZFIN;Acc:ZDB-GENE-040704-45]	83	49	protein_coding	FALSE	FALSE
ENSDARG00000058354	selt1a	7.02161	2.27135	0.627494	selenoprotein T, 1a [Source:ZFIN;Acc:ZDB-GENE-030327-6]	72	72	protein_coding	TRUE	TRUE
ENSDARG00000058459	plekhg2	7.02161	3.67767	2.31334	pleckstrin homology domain containing, family G (with RhoGef domain) member 2 [Source:ZFIN;Acc:ZDB-GENE-090819-1]	22	24	protein_coding	FALSE	FALSE
ENSDARG00000059725	hypk	7.02161	2.09893	0.342939	huntingtin interacting protein K [Source:ZFIN;Acc:ZDB-GENE-080515-6]	87	87	protein_coding	FALSE	FALSE
ENSDARG00000070553	rnmt	7.02161	3.33288	1.94511	RNA (guanine-7-) methyltransferase [Source:ZFIN;Acc:ZDB-GENE-041008-25]	59	57	protein_coding	FALSE	FALSE
ENSDARG00000077220	si.ch211.208f21.3	7.02161	3.5266	2.14599	si:ch211-208f21.3 [Source:ZFIN;Acc:ZDB-GENE-110913-7]	0	0	protein_coding	FALSE	FALSE
ENSDARG00000091631	si.ch211.197h24.6	7.02161	2.11005	0.360804	si:ch211-197h24.6 [Source:ZFIN;Acc:ZDB-GENE-030131-1361]	0	0	protein_coding	FALSE	FALSE
ENSDARG00000101443	zgc.66014	7.02161	3.69394	2.33184	zgc:66014 [Source:ZFIN;Acc:ZDB-GENE-040426-1507]	73	74	protein_coding	FALSE	FALSE
ENSDARG00000103046	rest	7.02161	1.68222	0	RE1-silencing transcription factor [Source:ZFIN;Acc:ZDB-GENE-080415-1]	36	37	protein_coding	FALSE	FALSE
ENSDARG00000103213	si.dkey.56m15.8	7.02161	2.29807	0.669496	si:dkey-56m15.8 [Source:ZFIN;Acc:ZDB-GENE-110914-109]	43	45	protein_coding	FALSE	FALSE
ENSDARG00000103817	TMEM42..1.to.many.	7.02161	1.84243	0	transmembrane protein 42 [Source:HGNC Symbol;Acc:HGNC:28444]	31	32	protein_coding	TRUE	TRUE
ENSDARG00000007901	crnkl1	6.99122	5.07085	3.82944	crooked neck pre-mRNA splicing factor 1 [Source:ZFIN;Acc:ZDB-GENE-040426-694]	78	77	protein_coding	FALSE	FALSE
ENSDARG00000009735	gigfy2	6.99122	2.36553	0.767796	GRB10 interacting GYF protein 2 [Source:ZFIN;Acc:ZDB-GENE-050706-185]	60	60	protein_coding	FALSE	FALSE
ENSDARG00000013333	ndufa10	6.99122	3.02662	1.60688	NADH dehydrogenase (ubiquinone) 1 alpha subcomplex, 10 [Source:ZFIN;Acc:ZDB-GENE-030131-670]	49	50	protein_coding	FALSE	FALSE
ENSDARG00000016477	eif4a2	6.99122	1.76038	0	eukaryotic translation initiation factor 4A, isoform 2 [Source:ZFIN;Acc:ZDB-GENE-040426-2802]	94	94	protein_coding	FALSE	FALSE
ENSDARG00000017397	smarcc1a	6.99122	1.50795	0	SWI/SNF related, matrix associated, actin dependent regulator of chromatin, subfamily c, member 1a [Source:ZFIN;Acc:ZDB-GENE-080514-3]	69	69	protein_coding	FALSE	FALSE
ENSDARG00000018658	aar2	6.99122	2.85685	1.40597	AAR2 splicing factor homolog (S. cerevisiae) [Source:ZFIN;Acc:ZDB-GENE-040704-68]	60	61	protein_coding	FALSE	FALSE
ENSDARG00000019810	nfe2l3	6.99122	2.25886	0.608472	nuclear factor, erythroid 2-like 3 [Source:ZFIN;Acc:ZDB-GENE-040426-2334]	27	29	protein_coding	FALSE	FALSE
ENSDARG00000023878	stk24b	6.99122	1.5825	0	serine/threonine kinase 24b (STE20 homolog, yeast) [Source:ZFIN;Acc:ZDB-GENE-040426-2841]	82	81	protein_coding	FALSE	FALSE
ENSDARG00000024416	twistnb	6.99122	2.76708	1.29711	TWIST neighbor [Source:ZFIN;Acc:ZDB-GENE-041007-3]	38	40	protein_coding	FALSE	FALSE
ENSDARG00000024846	cops8	6.99122	4.13552	2.78616	COP9 signalosome subunit 8 [Source:ZFIN;Acc:ZDB-GENE-040426-982]	73	73	protein_coding	FALSE	FALSE
ENSDARG00000031372	efna2a	6.99122	2.5704	1.04516	ephrin-A2a [Source:ZFIN;Acc:ZDB-GENE-990415-66]	57	55	protein_coding	FALSE	TRUE
ENSDARG00000037392	med19a	6.99122	1.80653	0	mediator complex subunit 19a [Source:ZFIN;Acc:ZDB-GENE-060929-232]	64	50	protein_coding	FALSE	FALSE
ENSDARG00000045228	stub1	6.99122	2.75397	1.28247	STIP1 homology and U-Box containing protein 1 [Source:ZFIN;Acc:ZDB-GENE-030131-2963]	79	80	protein_coding	FALSE	FALSE
ENSDARG00000045989	arf4a.2	6.99122	2.5019	0.95197	ADP-ribosylation factor 4a [Source:ZFIN;Acc:ZDB-GENE-040801-109]	91	91	protein_coding	FALSE	FALSE
ENSDARG00000053990	hmgb2b	6.99122	2.79838	1.33461	high mobility group box 2b [Source:ZFIN;Acc:ZDB-GENE-040912-122]	0	0	protein_coding	FALSE	FALSE
ENSDARG00000056127	polr2gl	6.99122	3.34938	1.96155	polymerase (RNA) II (DNA directed) polypeptide G-like [Source:ZFIN;Acc:ZDB-GENE-030131-2808]	99	99	protein_coding	FALSE	FALSE
ENSDARG00000056258	cdc27	6.99122	4.06864	2.72206	cell division cycle 27 [Source:ZFIN;Acc:ZDB-GENE-990706-2]	79	79	protein_coding	FALSE	FALSE
ENSDARG00000067723	tank.1	6.99122	2.99788	1.57447	TRAF family member-associated NFKB activator [Source:ZFIN;Acc:ZDB-GENE-060929-308]	35	41	protein_coding	FALSE	FALSE
ENSDARG00000068258	lrch4	6.99122	3.12538	1.71836	leucine-rich repeats and calponin homology (CH) domain containing 4 [Source:ZFIN;Acc:ZDB-GENE-060503-749]	46	46	protein_coding	TRUE	FALSE
ENSDARG00000069910	gtf2f2a	6.99122	2.85447	1.40391	general transcription factor IIF, polypeptide 2a [Source:ZFIN;Acc:ZDB-GENE-040625-131]	75	75	protein_coding	FALSE	FALSE
ENSDARG00000073737	suds3	6.99122	2.03602	0.221329	SDS3 homolog, SIN3A corepressor complex component [Source:ZFIN;Acc:ZDB-GENE-040801-236]	81	83	protein_coding	FALSE	FALSE
ENSDARG00000092305	poldip2	6.99122	4.29322	2.94767	polymerase (DNA-directed), delta interacting protein 2 [Source:ZFIN;Acc:ZDB-GENE-030131-5881]	75	76	protein_coding	FALSE	FALSE
ENSDARG00000093382	uqcc3	6.99122	2.88914	1.44346	ubiquinol-cytochrome c reductase complex assembly factor 3 [Source:ZFIN;Acc:ZDB-GENE-030131-8451]	0	0	protein_coding	TRUE	FALSE
ENSDARG00000095634	si.ch211.66k16.2	6.99122	4.2927	2.94767	si:ch211-66k16.2 [Source:ZFIN;Acc:ZDB-GENE-070912-303]	0	0	protein_coding	FALSE	FALSE
ENSDARG00000101458	r3hdm1	6.99122	3.22538	1.82197	R3H domain containing 1 [Source:ZFIN;Acc:ZDB-GENE-030131-7119]	48	49	protein_coding	FALSE	FALSE
ENSDARG00000102808	calr3b	6.99122	3.84014	2.4777	calreticulin 3b [Source:ZFIN;Acc:ZDB-GENE-030131-9907]	55	44	protein_coding	FALSE	TRUE
ENSDARG00000103137	rmi2	6.99122	3.09258	1.68393	RecQ mediated genome instability 2 [Source:ZFIN;Acc:ZDB-GENE-131125-13]	45	46	protein_coding	FALSE	FALSE
ENSDARG00000003693	hars	6.96082	2.8745	1.42954	histidyl-tRNA synthetase [Source:ZFIN;Acc:ZDB-GENE-040912-152]	72	72	protein_coding	FALSE	FALSE
ENSDARG00000016016	dbnlb	6.96082	2.38073	0.788004	drebrin-like b [Source:ZFIN;Acc:ZDB-GENE-050522-293]	53	53	protein_coding	FALSE	FALSE
ENSDARG00000019038	sgsm3	6.96082	4.1956	2.84379	small G protein signaling modulator 3 [Source:ZFIN;Acc:ZDB-GENE-040426-2635]	78	78	protein_coding	FALSE	FALSE
ENSDARG00000019188	ube2l3a	6.96082	3.41407	2.03671	ubiquitin-conjugating enzyme E2L 3a [Source:ZFIN;Acc:ZDB-GENE-030131-2977]	85	84	protein_coding	FALSE	FALSE
ENSDARG00000027744	gadd45ba	6.96082	2.82546	1.37181	growth arrest and DNA-damage-inducible, beta a [Source:ZFIN;Acc:ZDB-GENE-040426-1971]	66	69	protein_coding	FALSE	FALSE
ENSDARG00000035282	emc6	6.96082	3.1886	1.7842	ER membrane protein complex subunit 6 [Source:ZFIN;Acc:ZDB-GENE-030131-9164]	89	89	protein_coding	TRUE	FALSE
ENSDARG00000038768	mrpl12	6.96082	2.72063	1.2404	mitochondrial ribosomal protein L12 [Source:ZFIN;Acc:ZDB-GENE-050417-187]	59	57	protein_coding	FALSE	FALSE
ENSDARG00000040666	nifk	6.96082	2.07272	0.294456	nucleolar protein interacting with the FHA domain of MKI67 [Source:ZFIN;Acc:ZDB-GENE-021231-4]	45	49	protein_coding	FALSE	FALSE
ENSDARG00000043571	zgc.103670	6.96082	2.37794	0.784128	zgc:103670 [Source:ZFIN;Acc:ZDB-GENE-040912-111]	79	83	protein_coding	FALSE	FALSE
ENSDARG00000043899	psma6l	6.96082	3.41413	2.03671	proteasome subunit alpha 6, like [Source:ZFIN;Acc:ZDB-GENE-010502-2]	0	0	protein_coding	FALSE	FALSE
ENSDARG00000059461	mepce	6.96082	2.33834	0.729293	methylphosphate capping enzyme [Source:ZFIN;Acc:ZDB-GENE-030131-3936]	42	43	protein_coding	FALSE	FALSE
ENSDARG00000061504	kdm4c	6.96082	2.92933	1.48896	lysine (K)-specific demethylase 4C [Source:ZFIN;Acc:ZDB-GENE-070209-38]	40	29	protein_coding	FALSE	FALSE
ENSDARG00000069624	mrps18c	6.96082	1.94533	0.0458401	mitochondrial ribosomal protein S18C [Source:ZFIN;Acc:ZDB-GENE-060503-609]	48	49	protein_coding	FALSE	FALSE
ENSDARG00000071378	si.dkey.78l4.14	6.96082	2.84116	1.39176	si:dkey-78l4.14 [Source:ZFIN;Acc:ZDB-GENE-050309-178]	42	41	protein_coding	FALSE	FALSE
ENSDARG00000075380	kri1	6.96082	3.23762	1.83356	KRI1 homolog [Source:ZFIN;Acc:ZDB-GENE-040915-3]	49	51	protein_coding	FALSE	FALSE
ENSDARG00000075743	mrpl47	6.96082	2.26946	0.624652	mitochondrial ribosomal protein L47 [Source:ZFIN;Acc:ZDB-GENE-030219-177]	50	50	protein_coding	FALSE	FALSE
ENSDARG00000076501	asxl2	6.96082	2.64404	1.14596	additional sex combs like transcriptional regulator 2 [Source:ZFIN;Acc:ZDB-GENE-100412-1]	38	24	protein_coding	FALSE	FALSE
ENSDARG00000078281	zgc.173575	6.96082	2.92877	1.48867	zgc:173575 [Source:ZFIN;Acc:ZDB-GENE-080218-25]	0	0	protein_coding	FALSE	FALSE
ENSDARG00000079631	ZFP91	6.96082	2.60602	1.09385	si:ch211-113e8.10 [Source:ZFIN;Acc:ZDB-GENE-090313-11]	31	31	protein_coding	FALSE	FALSE
ENSDARG00000079949	supt16h	6.96082	2.39744	0.809995	SPT16 homolog, facilitates chromatin remodeling subunit [Source:ZFIN;Acc:ZDB-GENE-031118-96]	83	84	protein_coding	FALSE	FALSE
ENSDARG00000086778	pdgfba	6.96082	2.80374	1.34249	platelet-derived growth factor beta polypeptide a [Source:ZFIN;Acc:ZDB-GENE-050208-525]	17	17	protein_coding	FALSE	TRUE
ENSDARG00000095682	si.ch211.194e1.8	6.96082	1.91796	0	si:ch211-194e1.8 [Source:ZFIN;Acc:ZDB-GENE-081105-184]	0	0	processed_transcript	NA	NA
ENSDARG00000095904	prpf31	6.96082	3.56666	2.19148	PRP31 pre-mRNA processing factor 31 homolog (yeast) [Source:ZFIN;Acc:ZDB-GENE-040426-1561]	82	82	protein_coding	FALSE	FALSE
ENSDARG00000098226	smpd3	6.96082	2.18945	0.502252	sphingomyelin phosphodiesterase 3, neutral [Source:ZFIN;Acc:ZDB-GENE-081104-280]	54	55	protein_coding	TRUE	FALSE
ENSDARG00000099139	fbxw5	6.96082	2.9269	1.48661	F-box and WD repeat domain containing 5 [Source:ZFIN;Acc:ZDB-GENE-040426-2571]	67	66	protein_coding	FALSE	FALSE
ENSDARG00000104068	gstp1	6.96082	2.81934	1.36268	glutathione S-transferase pi 1 [Source:ZFIN;Acc:ZDB-GENE-020806-4]	58	59	protein_coding	FALSE	FALSE
ENSDARG00000003531	tcea1	6.93042	3.58065	2.2042	transcription elongation factor A (SII), 1 [Source:ZFIN;Acc:ZDB-GENE-030131-8049]	70	73	protein_coding	FALSE	FALSE
ENSDARG00000004074	bach2b	6.93042	3.5123	2.1304	BTB and CNC homology 1, basic leucine zipper transcription factor 2b [Source:ZFIN;Acc:ZDB-GENE-041001-139]	58	60	protein_coding	FALSE	FALSE
ENSDARG00000005458	csnk1g2a	6.93042	3.6346	2.2647	casein kinase 1, gamma 2a [Source:ZFIN;Acc:ZDB-GENE-030131-6445]	83	82	protein_coding	FALSE	FALSE
ENSDARG00000006624	ppp2r2ab	6.93042	2.5141	0.964846	protein phosphatase 2, regulatory subunit B, alpha b [Source:ZFIN;Acc:ZDB-GENE-030131-5474]	91	91	protein_coding	FALSE	FALSE
ENSDARG00000007347	degs1	6.93042	1.62194	0	delta(4)-desaturase, sphingolipid 1 [Source:ZFIN;Acc:ZDB-GENE-030131-5283]	72	74	protein_coding	TRUE	FALSE
ENSDARG00000008396	ftr24	6.93042	2.01884	0.185792	finTRIM family, member 24 [Source:ZFIN;Acc:ZDB-GENE-050731-2]	0	0	protein_coding	FALSE	FALSE
ENSDARG00000009480	pdcl	6.93042	2.01306	0.176602	phosducin-like [Source:ZFIN;Acc:ZDB-GENE-030131-2365]	57	58	protein_coding	FALSE	FALSE
ENSDARG00000012892	ammecr1	6.93042	2.89565	1.44996	Alport syndrome, mental retardation, midface hypoplasia and elliptocytosis chromosomal region gene 1 homolog (human) [Source:ZFIN;Acc:ZDB-GENE-040426-1533]	74	75	protein_coding	FALSE	FALSE
ENSDARG00000014692	znf622	6.93042	3.39984	2.02335	zinc finger protein 622 [Source:ZFIN;Acc:ZDB-GENE-050927-1]	64	64	protein_coding	FALSE	FALSE
ENSDARG00000016788	zeb1a	6.93042	3.70818	2.34056	zinc finger E-box binding homeobox 1a [Source:ZFIN;Acc:ZDB-GENE-070912-124]	38	39	protein_coding	FALSE	FALSE
ENSDARG00000021945	ddx23	6.93042	2.67305	1.18119	DEAD (Asp-Glu-Ala-Asp) box polypeptide 23 [Source:ZFIN;Acc:ZDB-GENE-030131-6215]	85	85	protein_coding	FALSE	FALSE
ENSDARG00000026595	pafah1b1b	6.93042	2.19034	0.50305	platelet-activating factor acetylhydrolase 1b, regulatory subunit 1b [Source:ZFIN;Acc:ZDB-GENE-040116-3]	93	94	protein_coding	FALSE	FALSE
ENSDARG00000030237	pgrmc2	6.93042	4.48084	3.14959	progesterone receptor membrane component 2 [Source:ZFIN;Acc:ZDB-GENE-040426-2102]	63	64	protein_coding	TRUE	FALSE
ENSDARG00000035129	zgc.101858	6.93042	3.32852	1.94309	zgc:101858 [Source:ZFIN;Acc:ZDB-GENE-040927-13]	0	0	protein_coding	FALSE	FALSE
ENSDARG00000035549	uprt	6.93042	1.85579	0	uracil phosphoribosyltransferase (FUR1) homolog (S. cerevisiae) [Source:ZFIN;Acc:ZDB-GENE-040426-2411]	76	76	protein_coding	FALSE	FALSE
ENSDARG00000036057	tradd	6.93042	3.24933	1.84887	tnfrsf1a-associated via death domain [Source:ZFIN;Acc:ZDB-GENE-000511-5]	40	42	protein_coding	FALSE	FALSE
ENSDARG00000045913	mrps10	6.93042	6.15998	5.04683	mitochondrial ribosomal protein S10 [Source:ZFIN;Acc:ZDB-GENE-040914-39]	55	54	protein_coding	FALSE	FALSE
ENSDARG00000060065	ubap2b	6.93042	2.69405	1.20552	ubiquitin associated protein 2b [Source:ZFIN;Acc:ZDB-GENE-070209-122]	45	45	protein_coding	FALSE	FALSE
ENSDARG00000074622	MYO5A..1.to.many.	6.93042	3.14366	1.73926	myosin VA [Source:HGNC Symbol;Acc:HGNC:7602]	66	67	protein_coding	FALSE	FALSE
ENSDARG00000089055	ube2ka	6.93042	3.02706	1.60688	ubiquitin-conjugating enzyme E2Ka (UBC1 homolog, yeast) [Source:ZFIN;Acc:ZDB-GENE-050320-48]	96	96	protein_coding	FALSE	FALSE
ENSDARG00000098349	hdac4	6.93042	4.0724	2.7231	histone deacetylase 4 [Source:ZFIN;Acc:ZDB-GENE-061013-95]	81	80	protein_coding	FALSE	FALSE
ENSDARG00000101619	minos1	6.93042	3.42799	2.05028	mitochondrial inner membrane organizing system 1 [Source:ZFIN;Acc:ZDB-GENE-060825-325]	66	67	protein_coding	TRUE	FALSE
ENSDARG00000102964	axin1	6.93042	2.9893	1.56533	axin 1 [Source:ZFIN;Acc:ZDB-GENE-000403-1]	66	65	protein_coding	FALSE	FALSE
ENSDARG00000103823	RBMS1..1.to.many.	6.93042	2.28098	0.641458	RNA binding motif, single stranded interacting protein 1 [Source:HGNC Symbol;Acc:HGNC:9907]	79	77	protein_coding	FALSE	FALSE
ENSDARG00000104069	rnf170	6.93042	3.20433	1.80012	ring finger protein 170 [Source:ZFIN;Acc:ZDB-GENE-040426-2572]	60	61	protein_coding	TRUE	FALSE
ENSDARG00000006010	bmi1a	6.90003	2.61898	1.11008	bmi1 polycomb ring finger oncogene 1a [Source:ZFIN;Acc:ZDB-GENE-030131-224]	82	82	protein_coding	FALSE	FALSE
ENSDARG00000013274	eif4eb	6.90003	2.12057	0.377057	eukaryotic translation initiation factor 4eb [Source:ZFIN;Acc:ZDB-GENE-041121-14]	82	83	protein_coding	FALSE	FALSE
ENSDARG00000013382	cwc15	6.90003	1.923	0.00489994	CWC15 spliceosome-associated protein homolog (S. cerevisiae) [Source:ZFIN;Acc:ZDB-GENE-040625-10]	79	79	protein_coding	FALSE	FALSE
ENSDARG00000013734	polr3glb	6.90003	6.37313	5.27989	polymerase (RNA) III (DNA directed) polypeptide G like b [Source:ZFIN;Acc:ZDB-GENE-041010-32]	55	55	protein_coding	FALSE	FALSE
ENSDARG00000013822	anapc16	6.90003	3.11323	1.70734	anaphase promoting complex subunit 16 [Source:ZFIN;Acc:ZDB-GENE-050417-430]	88	88	protein_coding	FALSE	FALSE
ENSDARG00000017047	slc27a4	6.90003	2.50799	0.957251	solute carrier family 27 (fatty acid transporter), member 4 [Source:ZFIN;Acc:ZDB-GENE-050417-248]	69	70	protein_coding	TRUE	FALSE
ENSDARG00000018159	ano10b	6.90003	2.69563	1.20713	anoctamin 10b [Source:ZFIN;Acc:ZDB-GENE-061013-169]	0	0	protein_coding	TRUE	FALSE
ENSDARG00000028721	mapk14b	6.90003	1.5513	0	mitogen-activated protein kinase 14b [Source:ZFIN;Acc:ZDB-GENE-021007-1]	91	92	protein_coding	FALSE	FALSE
ENSDARG00000031770	kat7b	6.90003	3.81571	2.45097	K(lysine) acetyltransferase 7b [Source:ZFIN;Acc:ZDB-GENE-030131-1901]	84	84	protein_coding	FALSE	FALSE
ENSDARG00000036995	lsm6	6.90003	2.34026	0.732419	LSM6 homolog, U6 small nuclear RNA and mRNA degradation associated [Source:ZFIN;Acc:ZDB-GENE-040625-50]	96	96	protein_coding	FALSE	FALSE
ENSDARG00000042056	mau2	6.90003	2.50235	0.95197	MAU2 sister chromatid cohesion factor [Source:ZFIN;Acc:ZDB-GENE-050522-383]	71	72	protein_coding	FALSE	FALSE
ENSDARG00000042621	cryaba	6.90003	3.60628	2.23365	crystallin, alpha B, a [Source:ZFIN;Acc:ZDB-GENE-991119-2]	61	61	protein_coding	FALSE	FALSE
ENSDARG00000042851	srp9	6.90003	3.30952	1.9221	signal recognition particle 9 [Source:ZFIN;Acc:ZDB-GENE-040426-1106]	77	78	protein_coding	FALSE	FALSE
ENSDARG00000045695	myca	6.90003	2.47165	0.912249	v-myc avian myelocytomatosis viral oncogene homolog a [Source:ZFIN;Acc:ZDB-GENE-990415-162]	57	58	protein_coding	FALSE	FALSE
ENSDARG00000055120	ctsba	6.90003	2.82902	1.37602	cathepsin Ba [Source:ZFIN;Acc:ZDB-GENE-040426-2650]	69	72	protein_coding	FALSE	TRUE
ENSDARG00000059553	sympk	6.90003	5.20166	3.96665	symplekin [Source:ZFIN;Acc:ZDB-GENE-060526-361]	67	67	protein_coding	FALSE	FALSE
ENSDARG00000061631	fbxo11a.4	6.90003	2.17584	0.47889	F-box protein 11a [Source:ZFIN;Acc:ZDB-GENE-061103-70]	97	97	protein_coding	FALSE	FALSE
ENSDARG00000062009	gpr18	6.90003	3.26794	1.87101	G protein-coupled receptor 18 [Source:ZFIN;Acc:ZDB-GENE-070912-159]	58	60	protein_coding	TRUE	FALSE
ENSDARG00000069065	btg3	6.90003	2.55718	1.0275	B-cell translocation gene 3 [Source:ZFIN;Acc:ZDB-GENE-031113-19]	59	59	protein_coding	FALSE	FALSE
ENSDARG00000071272	ncoa6	6.90003	2.89417	1.44811	nuclear receptor coactivator 6 [Source:ZFIN;Acc:ZDB-GENE-080403-12]	37	38	protein_coding	FALSE	FALSE
ENSDARG00000078313	MYO9B..1.to.many.	6.90003	4.43113	3.09709	si:zfos-588f8.1 [Source:ZFIN;Acc:ZDB-GENE-110411-111]	52	53	protein_coding	FALSE	FALSE
ENSDARG00000087897	h2afy2	6.90003	1.61041	0	H2A histone family, member Y2 [Source:ZFIN;Acc:ZDB-GENE-050913-114]	74	74	protein_coding	FALSE	FALSE
ENSDARG00000088087	KDM6B	6.90003	3.75523	2.39441	lysine (K)-specific demethylase 6B [Source:HGNC Symbol;Acc:HGNC:29012]	32	33	protein_coding	FALSE	FALSE
ENSDARG00000100513	rps27.2	6.90003	3.62802	2.25706	ribosomal protein S27, isoform 2 [Source:ZFIN;Acc:ZDB-GENE-040426-1735]	90	90	protein_coding	FALSE	FALSE
ENSDARG00000100519	spop	6.90003	2.88132	1.43601	speckle-type POZ protein [Source:ZFIN;Acc:ZDB-GENE-040426-1378]	0	0	protein_coding	FALSE	FALSE
ENSDARG00000104341	si.dkey.238o14.1	6.90003	2.5781	1.05589	si:dkey-238o14.1 [Source:ZFIN;Acc:ZDB-GENE-081103-10]	0	0	protein_coding	FALSE	FALSE
ENSDARG00000003592	surf1	6.86963	6.03947	4.9153	surfeit 1 [Source:ZFIN;Acc:ZDB-GENE-041108-2]	59	57	protein_coding	FALSE	FALSE
ENSDARG00000006125	csnk1db	6.86963	2.52294	0.978646	casein kinase 1, delta b [Source:ZFIN;Acc:ZDB-GENE-040426-2385]	93	93	protein_coding	FALSE	FALSE
ENSDARG00000013161	zgc.55558	6.86963	4.18869	2.84053	zgc:55558 [Source:ZFIN;Acc:ZDB-GENE-040426-740]	43	45	protein_coding	FALSE	FALSE
ENSDARG00000015239	prp19	6.86963	2.77393	1.30522	PRP19/PSO4 homolog (S. cerevisiae) [Source:ZFIN;Acc:ZDB-GENE-030131-263]	85	85	protein_coding	FALSE	FALSE
ENSDARG00000017844	copz1	6.86963	1.66559	0	coatomer protein complex, subunit zeta 1 [Source:ZFIN;Acc:ZDB-GENE-000406-6]	82	81	protein_coding	FALSE	FALSE
ENSDARG00000018426	aldh7a1	6.86963	4.07882	2.72934	aldehyde dehydrogenase 7 family, member A1 [Source:ZFIN;Acc:ZDB-GENE-030131-6129]	78	81	protein_coding	FALSE	FALSE
ENSDARG00000020377	eif4g2a	6.86963	2.01776	0.184859	eukaryotic translation initiation factor 4, gamma 2a [Source:ZFIN;Acc:ZDB-GENE-030131-2173]	83	83	protein_coding	FALSE	FALSE
ENSDARG00000037177	zc3h13	6.86963	1.67653	0	zinc finger CCCH-type containing 13 [Source:ZFIN;Acc:ZDB-GENE-040426-1619]	47	44	protein_coding	FALSE	FALSE
ENSDARG00000038028	ndufa6	6.86963	3.41444	2.03671	NADH dehydrogenase (ubiquinone) 1 alpha subcomplex, 6 [Source:ZFIN;Acc:ZDB-GENE-040426-1124]	73	73	protein_coding	FALSE	FALSE
ENSDARG00000038239	tnpo2	6.86963	2.86044	1.41016	transportin 2 (importin 3, karyopherin beta 2b) [Source:ZFIN;Acc:ZDB-GENE-040822-16]	0	0	protein_coding	FALSE	FALSE
ENSDARG00000038312	rcl1	6.86963	2.97218	1.54306	RNA terminal phosphate cyclase-like 1 [Source:ZFIN;Acc:ZDB-GENE-040930-11]	76	76	protein_coding	FALSE	FALSE
ENSDARG00000039378	rcn2	6.86963	4.10781	2.76666	reticulocalbin 2 [Source:ZFIN;Acc:ZDB-GENE-050706-62]	42	41	protein_coding	FALSE	FALSE
ENSDARG00000040864	si.dkey.286j15.1	6.86963	2.33416	0.723486	si:dkey-286j15.1 [Source:ZFIN;Acc:ZDB-GENE-060503-447]	0	0	protein_coding	FALSE	FALSE
ENSDARG00000045230	cox6b1	6.86963	1.67546	0	cytochrome c oxidase subunit VIb polypeptide 1 [Source:ZFIN;Acc:ZDB-GENE-040718-448]	71	72	protein_coding	FALSE	FALSE
ENSDARG00000045372	ngdn	6.86963	1.65974	0	neuroguidin, EIF4E binding protein [Source:ZFIN;Acc:ZDB-GENE-031030-13]	54	56	protein_coding	FALSE	FALSE
ENSDARG00000055472	nubp1	6.86963	3.1693	1.76383	nucleotide binding protein 1 (MinD homolog, E. coli) [Source:ZFIN;Acc:ZDB-GENE-050417-471]	75	74	protein_coding	FALSE	FALSE
ENSDARG00000057414	phb	6.86963	4.64001	3.33169	prohibitin [Source:ZFIN;Acc:ZDB-GENE-030131-6577]	92	92	protein_coding	FALSE	FALSE
ENSDARG00000058444	snx6	6.86963	2.02311	0.19277	sorting nexin 6 [Source:ZFIN;Acc:ZDB-GENE-050913-152]	83	83	protein_coding	FALSE	FALSE
ENSDARG00000059097	nktr	6.86963	2.3433	0.735957	natural killer cell triggering receptor [Source:ZFIN;Acc:ZDB-GENE-030131-1725]	37	37	protein_coding	FALSE	FALSE
ENSDARG00000061100	nars	6.86963	2.00266	0.157308	asparaginyl-tRNA synthetase [Source:ZFIN;Acc:ZDB-GENE-030131-1016]	81	81	protein_coding	FALSE	FALSE
ENSDARG00000062696	dgkg	6.86963	2.7297	1.25108	diacylglycerol kinase, gamma [Source:ZFIN;Acc:ZDB-GENE-081105-39]	66	67	protein_coding	FALSE	FALSE
ENSDARG00000069074	cry1ba	6.86963	2.76435	1.29527	cryptochrome circadian clock 1ba [Source:ZFIN;Acc:ZDB-GENE-010426-4]	0	0	protein_coding	FALSE	FALSE
ENSDARG00000075831	slc7a8a	6.86963	5.42615	4.22969	solute carrier family 7 (amino acid transporter light chain, L system), member 8a [Source:ZFIN;Acc:ZDB-GENE-121120-2]	82	81	protein_coding	TRUE	FALSE
ENSDARG00000077607	dus2	6.86963	2.93401	1.49351	dihydrouridine synthase 2 [Source:ZFIN;Acc:ZDB-GENE-100922-233]	62	61	protein_coding	FALSE	FALSE
ENSDARG00000088900	si.dkey.21o19.2	6.86963	1.79145	0	si:dkey-21o19.2 [Source:ZFIN;Acc:ZDB-GENE-090313-241]	0	0	protein_coding	FALSE	FALSE
ENSDARG00000093448	mpc1	6.86963	2.91626	1.4723	mitochondrial pyruvate carrier 1 [Source:ZFIN;Acc:ZDB-GENE-040718-94]	82	82	protein_coding	TRUE	FALSE
ENSDARG00000094010	swt1	6.86963	3.61893	2.24635	SWT1 RNA endoribonuclease homolog [Source:ZFIN;Acc:ZDB-GENE-041015-373]	27	26	protein_coding	FALSE	FALSE
ENSDARG00000098257	pcdh15a	6.86963	1.64336	0	protocadherin-related 15a [Source:ZFIN;Acc:ZDB-GENE-030616-3]	56	57	protein_coding	TRUE	TRUE
ENSDARG00000098361	nudcd3	6.86963	2.71086	1.2275	NudC domain containing 3 [Source:ZFIN;Acc:ZDB-GENE-040426-2255]	58	57	protein_coding	FALSE	FALSE
ENSDARG00000099616	si.ch73.214d15.1	6.86963	3.45452	2.07153	si:ch73-214d15.1 [Source:ZFIN;Acc:ZDB-GENE-141216-451]	0	0	lincRNA	NA	NA
ENSDARG00000103787	chd1	6.86963	1.56456	0	chromodomain helicase DNA binding protein 1 [Source:ZFIN;Acc:ZDB-GENE-030131-7120]	75	75	protein_coding	FALSE	FALSE
ENSDARG00000104071	zgc.110091	6.86963	5.121	3.88664	zgc:110091 [Source:ZFIN;Acc:ZDB-GENE-050417-34]	74	72	protein_coding	FALSE	FALSE
ENSDARG00000002538	smu1a	6.83923	1.55211	0	smu-1 suppressor of mec-8 and unc-52 homolog a (C. elegans) [Source:ZFIN;Acc:ZDB-GENE-040426-916]	96	96	protein_coding	FALSE	FALSE
ENSDARG00000006169	lrrk2	6.83923	2.21752	0.547737	leucine-rich repeat kinase 2 [Source:ZFIN;Acc:ZDB-GENE-071218-6]	46	47	protein_coding	FALSE	FALSE
ENSDARG00000011152	rpp14	6.83923	5.60622	4.43166	ribonuclease P/MRP 14 subunit [Source:ZFIN;Acc:ZDB-GENE-050522-182]	54	58	protein_coding	FALSE	FALSE
ENSDARG00000018809	abhd3	6.83923	3.14838	1.7431	abhydrolase domain containing 3 [Source:ZFIN;Acc:ZDB-GENE-040912-90]	65	66	protein_coding	FALSE	FALSE
ENSDARG00000023058	foxo3a	6.83923	1.54799	0	forkhead box O3A [Source:ZFIN;Acc:ZDB-GENE-050116-1]	58	58	protein_coding	FALSE	FALSE
ENSDARG00000026489	khsrp	6.83923	2.88805	1.44299	KH-type splicing regulatory protein [Source:ZFIN;Acc:ZDB-GENE-030131-4357]	69	69	protein_coding	FALSE	FALSE
ENSDARG00000028583	SLC16A3..1.to.many.	6.83923	3.35762	1.97179	si:ch211-234h8.7 [Source:ZFIN;Acc:ZDB-GENE-061009-16]	67	66	protein_coding	TRUE	FALSE
ENSDARG00000030166	hyi	6.83923	6.30119	5.20544	hydroxypyruvate isomerase [Source:ZFIN;Acc:ZDB-GENE-040426-1273]	53	56	protein_coding	TRUE	FALSE
ENSDARG00000032859	fam84b	6.83923	2.60489	1.09338	family with sequence similarity 84, member B [Source:ZFIN;Acc:ZDB-GENE-060929-1130]	65	66	protein_coding	FALSE	FALSE
ENSDARG00000035146	polr2j	6.83923	2.10889	0.360788	polymerase (RNA) II (DNA directed) polypeptide J [Source:ZFIN;Acc:ZDB-GENE-050522-120]	96	85	protein_coding	FALSE	FALSE
ENSDARG00000037570	polr1d	6.83923	3.82344	2.45868	polymerase (RNA) I polypeptide D [Source:ZFIN;Acc:ZDB-GENE-040930-4]	63	65	protein_coding	FALSE	FALSE
ENSDARG00000043046	fbxl5	6.83923	1.96565	0.0876312	F-box and leucine-rich repeat protein 5 [Source:ZFIN;Acc:ZDB-GENE-030131-900]	56	58	protein_coding	FALSE	FALSE
ENSDARG00000045513	taf3	6.83923	3.21911	1.81513	TAF3 RNA polymerase II, TATA box binding protein (TBP)-associated facto [Source:ZFIN;Acc:ZDB-GENE-030131-6406]	50	51	protein_coding	FALSE	FALSE
ENSDARG00000061459	RAPGEF2..1.to.many.	6.83923	1.55166	0	si:dkey-253i9.4 [Source:ZFIN;Acc:ZDB-GENE-090313-280]	0	0	protein_coding	FALSE	FALSE
ENSDARG00000062108	iffo1b	6.83923	3.28069	1.88623	intermediate filament family orphan 1b [Source:ZFIN;Acc:ZDB-GENE-050208-308]	48	48	protein_coding	FALSE	FALSE
ENSDARG00000063474	arfgef1	6.83923	2.95109	1.51472	ADP-ribosylation factor guanine nucleotide-exchange factor 1 (brefeldin A-inhibited) [Source:ZFIN;Acc:ZDB-GENE-030131-108]	86	73	protein_coding	FALSE	FALSE
ENSDARG00000078068	abcg4b	6.83923	3.6804	2.3153	ATP-binding cassette, sub-family G (WHITE), member 4b [Source:ZFIN;Acc:ZDB-GENE-080215-10]	77	77	protein_coding	TRUE	FALSE
ENSDARG00000087555	si.ch73.308l14.2	6.83923	2.76235	1.2924	si:ch73-308l14.2 [Source:ZFIN;Acc:ZDB-GENE-141219-12]	0	0	protein_coding	FALSE	FALSE
ENSDARG00000089720	CABZ01077218.1	6.83923	4.80253	3.50461		0	0	protein_coding	TRUE	TRUE
ENSDARG00000092124	cox14	6.83923	3.51072	2.12949	COX14 cytochrome c oxidase assembly factor [Source:ZFIN;Acc:ZDB-GENE-060503-626]	32	30	protein_coding	TRUE	FALSE
ENSDARG00000094846	si.ch211.14a11.5	6.83923	2.17882	0.482624	si:ch211-14a11.5 [Source:ZFIN;Acc:ZDB-GENE-050420-289]	0	0	processed_transcript	NA	NA
ENSDARG00000103313	rhot1b	6.83923	4.44427	3.11128	ras homolog family member T1 [Source:ZFIN;Acc:ZDB-GENE-061009-52]	79	79	protein_coding	TRUE	FALSE
ENSDARG00000007601	zmynd8	6.80884	2.8985	1.45178	zinc finger, MYND-type containing 8 [Source:ZFIN;Acc:ZDB-GENE-041119-1]	65	66	protein_coding	FALSE	FALSE
ENSDARG00000008200	ugp2b	6.80884	2.47922	0.922168	UDP-glucose pyrophosphorylase 2b [Source:ZFIN;Acc:ZDB-GENE-030131-6352]	84	84	protein_coding	FALSE	FALSE
ENSDARG00000013732	vta1	6.80884	3.57069	2.19608	vesicle (multivesicular body) trafficking 1 [Source:ZFIN;Acc:ZDB-GENE-040426-2154]	70	70	protein_coding	FALSE	FALSE
ENSDARG00000015325	u2af1	6.80884	3.0132	1.59124	U2 small nuclear RNA auxiliary factor 1 [Source:ZFIN;Acc:ZDB-GENE-020419-1]	92	92	protein_coding	FALSE	FALSE
ENSDARG00000016724	zgc.162339	6.80884	2.33382	0.723486	zgc:162339 [Source:ZFIN;Acc:ZDB-GENE-070410-76]	39	39	protein_coding	FALSE	FALSE
ENSDARG00000019797	qrich1	6.80884	2.55151	1.01998	glutamine-rich 1 [Source:ZFIN;Acc:ZDB-GENE-030131-8204]	68	68	protein_coding	FALSE	FALSE
ENSDARG00000020527	nup62l	6.80884	1.97958	0.119338	nucleoporin 62 like [Source:ZFIN;Acc:ZDB-GENE-030131-8491]	22	49	protein_coding	FALSE	FALSE
ENSDARG00000023536	nnt	6.80884	2.0812	0.310747	nicotinamide nucleotide transhydrogenase [Source:ZFIN;Acc:ZDB-GENE-040426-2592]	56	75	protein_coding	TRUE	FALSE
ENSDARG00000028067	bnip3lb	6.80884	2.36795	0.769603	BCL2/adenovirus E1B interacting protein 3-like b [Source:ZFIN;Acc:ZDB-GENE-040325-1]	59	61	protein_coding	TRUE	FALSE
ENSDARG00000035221	zgc.110249	6.80884	2.23277	0.570999	zgc:110249 [Source:ZFIN;Acc:ZDB-GENE-050522-331]	0	0	protein_coding	FALSE	FALSE
ENSDARG00000036778	hbs1l	6.80884	4.10724	2.76666	HBS1-like translational GTPase [Source:ZFIN;Acc:ZDB-GENE-030131-2987]	73	72	protein_coding	FALSE	FALSE
ENSDARG00000036784	commd7	6.80884	3.47083	2.09079	COMM domain containing 7 [Source:ZFIN;Acc:ZDB-GENE-040801-96]	61	60	protein_coding	FALSE	FALSE
ENSDARG00000040463	slc25a51b	6.80884	2.75925	1.28883	solute carrier family 25, member 51b [Source:ZFIN;Acc:ZDB-GENE-140328-2]	55	54	protein_coding	FALSE	FALSE
ENSDARG00000045352	cst14a.2	6.80884	3.2864	1.89199	cystatin 14a, tandem duplicate 2 [Source:ZFIN;Acc:ZDB-GENE-040426-1065]	34	54	protein_coding	FALSE	FALSE
ENSDARG00000055360	llph	6.80884	3.70235	2.33805	LLP homolog, long-term synaptic facilitation (Aplysia) [Source:ZFIN;Acc:ZDB-GENE-051030-30]	60	60	protein_coding	FALSE	FALSE
ENSDARG00000060498	tnfrsf9a	6.80884	2.3481	0.74413	tumor necrosis factor receptor superfamily, member 9a [Source:ZFIN;Acc:ZDB-GENE-060421-8213]	19	20	protein_coding	TRUE	TRUE
ENSDARG00000060729	trim8b	6.80884	3.1636	1.75848	tripartite motif containing 8b [Source:ZFIN;Acc:ZDB-GENE-030131-4325]	67	67	protein_coding	FALSE	FALSE
ENSDARG00000061579	myo1cb	6.80884	1.53829	0	myosin Ic, paralog b [Source:ZFIN;Acc:ZDB-GENE-090429-3]	73	73	protein_coding	FALSE	FALSE
ENSDARG00000067832	zgc.136336	6.80884	2.34894	0.744563	zgc:136336 [Source:ZFIN;Acc:ZDB-GENE-060512-84]	0	0	protein_coding	FALSE	FALSE
ENSDARG00000071259	fbxo34	6.80884	1.97969	0.119338	F-box protein 34 [Source:ZFIN;Acc:ZDB-GENE-030131-2194]	35	36	protein_coding	FALSE	FALSE
ENSDARG00000075314	zgc.174906	6.80884	3.15306	1.74715	zgc:174906 [Source:ZFIN;Acc:ZDB-GENE-030131-6125]	0	0	protein_coding	FALSE	FALSE
ENSDARG00000075323	srfbp1	6.80884	2.79185	1.32572	serum response factor binding protein 1 [Source:ZFIN;Acc:ZDB-GENE-040426-1991]	20	21	protein_coding	FALSE	FALSE
ENSDARG00000076439	ppp4cb	6.80884	2.84492	1.39478	protein phosphatase 4, catalytic subunit b [Source:ZFIN;Acc:ZDB-GENE-080219-32]	98	98	protein_coding	FALSE	FALSE
ENSDARG00000077664	zgc.110239	6.80884	2.36979	0.771797	zgc:110239 [Source:ZFIN;Acc:ZDB-GENE-050417-107]	0	0	protein_coding	FALSE	TRUE
ENSDARG00000078065	ftr96	6.80884	1.7875	0	finTRIM family, member 96 [Source:ZFIN;Acc:ZDB-GENE-141212-272]	0	0	protein_coding	FALSE	FALSE
ENSDARG00000078095	cipcb	6.80884	3.20384	1.8001	CLOCK-interacting pacemaker b [Source:ZFIN;Acc:ZDB-GENE-091204-292]	31	2	protein_coding	FALSE	FALSE
ENSDARG00000091699	capn2a	6.80884	3.53913	2.1611	calpain 2, (m/II) large subunit a [Source:ZFIN;Acc:ZDB-GENE-050320-69]	67	67	protein_coding	FALSE	TRUE
ENSDARG00000100222	utrn	6.80884	2.11221	0.364072	utrophin [Source:ZFIN;Acc:ZDB-GENE-070228-6]	0	0	protein_coding	TRUE	TRUE
ENSDARG00000100354	si.ch73.42p12.2	6.80884	3.57233	2.19757	si:ch73-42p12.2 [Source:ZFIN;Acc:ZDB-GENE-141216-329]	0	0	protein_coding	FALSE	FALSE
ENSDARG00000105424	si.rp71.46j2.7	6.80884	4.03409	2.68959	si:rp71-46j2.7 [Source:ZFIN;Acc:ZDB-GENE-160113-120]	NA	NA	protein_coding	NA	NA
ENSDARG00000003132	apip	6.77844	3.61372	2.24077	APAF1 interacting protein [Source:ZFIN;Acc:ZDB-GENE-040912-128]	77	77	protein_coding	FALSE	FALSE
ENSDARG00000010596	slc7a6os	6.77844	1.53879	0	solute carrier family 7, member 6 opposite strand [Source:ZFIN;Acc:ZDB-GENE-041114-32]	44	45	protein_coding	TRUE	FALSE
ENSDARG00000011246	krr1	6.77844	4.37126	3.02968	KRR1, small subunit (SSU) processome component, homolog (yeast) [Source:ZFIN;Acc:ZDB-GENE-060623-10]	73	72	protein_coding	FALSE	FALSE
ENSDARG00000012627	cdc34b	6.77844	2.48827	0.933983	cell division cycle 34 homolog (S. cerevisiae) b [Source:ZFIN;Acc:ZDB-GENE-040718-439]	84	84	protein_coding	FALSE	FALSE
ENSDARG00000019008	erp44	6.77844	2.71978	1.24022	endoplasmic reticulum protein 44 [Source:ZFIN;Acc:ZDB-GENE-040426-1902]	76	77	protein_coding	FALSE	FALSE
ENSDARG00000032997	rnf185	6.77844	2.1569	0.447908	ring finger protein 185 [Source:ZFIN;Acc:ZDB-GENE-040426-1977]	86	87	protein_coding	TRUE	FALSE
ENSDARG00000034098	CABZ01058865.1	6.77844	2.57505	1.05149		25	24	protein_coding	FALSE	TRUE
ENSDARG00000054583	mfsd6b	6.77844	1.64147	0	major facilitator superfamily domain containing 6b [Source:ZFIN;Acc:ZDB-GENE-040912-84]	50	51	protein_coding	TRUE	TRUE
ENSDARG00000058992	cers2b	6.77844	3.22293	1.81964	ceramide synthase 2b [Source:ZFIN;Acc:ZDB-GENE-110408-40]	61	64	protein_coding	TRUE	FALSE
ENSDARG00000059908	CCDC86	6.77844	1.60503	0	si:ch211-217k17.7 [Source:ZFIN;Acc:ZDB-GENE-061009-11]	31	35	protein_coding	FALSE	FALSE
ENSDARG00000061124	srpr	6.77844	4.27612	2.93321	signal recognition particle receptor (docking protein) [Source:ZFIN;Acc:ZDB-GENE-030219-11]	68	68	protein_coding	FALSE	FALSE
ENSDARG00000070516	si.dkeyp.52c3.2	6.77844	4.48884	3.15449	si:dkeyp-52c3.2 [Source:ZFIN;Acc:ZDB-GENE-110411-46]	0	0	protein_coding	FALSE	FALSE
ENSDARG00000078767	yeats2.2	6.77844	4.02555	2.68016	YEATS domain containing 2 [Source:ZFIN;Acc:ZDB-GENE-081104-292]	0	0	protein_coding	FALSE	FALSE
ENSDARG00000079150	si.ch211.276i12.9	6.77844	2.69482	1.20629	si:ch211-276i12.9 [Source:ZFIN;Acc:ZDB-GENE-141216-132]	0	0	protein_coding	FALSE	FALSE
ENSDARG00000100419	ints1	6.77844	4.65626	3.34798	integrator complex subunit 1 [Source:ZFIN;Acc:ZDB-GENE-030131-6523]	75	74	protein_coding	FALSE	FALSE
ENSDARG00000101301	si.dkey.261o4.1	6.77844	3.3096	1.9221	si:dkey-261o4.1 [Source:ZFIN;Acc:ZDB-GENE-141211-74]	0	0	protein_coding	FALSE	FALSE
ENSDARG00000007639	cnot4b	6.74805	2.84362	1.39347	CCR4-NOT transcription complex, subunit 4b [Source:ZFIN;Acc:ZDB-GENE-040426-1164]	67	67	protein_coding	FALSE	FALSE
ENSDARG00000007720	sub1b	6.74805	2.36644	0.767907	SUB1 homolog, transcriptional regulator b [Source:ZFIN;Acc:ZDB-GENE-040718-209]	73	73	protein_coding	FALSE	FALSE
ENSDARG00000009346	caprin1a	6.74805	3.44391	2.06417	cell cycle associated protein 1a [Source:ZFIN;Acc:ZDB-GENE-040801-226]	0	0	protein_coding	FALSE	FALSE
ENSDARG00000010779	tlk2	6.74805	2.31253	0.691171	tousled-like kinase 2 [Source:ZFIN;Acc:ZDB-GENE-060623-36]	86	86	protein_coding	FALSE	FALSE
ENSDARG00000018328	rhocb	6.74805	3.81092	2.44749	ras homolog family member Cb [Source:ZFIN;Acc:ZDB-GENE-040718-144]	93	93	protein_coding	FALSE	FALSE
ENSDARG00000021557	wdr45b	6.74805	2.89826	1.45178	WD repeat domain 45B [Source:ZFIN;Acc:ZDB-GENE-040426-863]	95	96	protein_coding	FALSE	FALSE
ENSDARG00000024966	MARK4..1.to.many.	6.74805	3.39	2.01161	si:dkey-31m14.7 [Source:ZFIN;Acc:ZDB-GENE-121214-92]	68	68	protein_coding	FALSE	FALSE
ENSDARG00000032985	mrpl27	6.74805	3.32177	1.93504	mitochondrial ribosomal protein L27 [Source:ZFIN;Acc:ZDB-GENE-050522-129]	61	64	protein_coding	FALSE	FALSE
ENSDARG00000042989	si.dkeyp.84f3.5	6.74805	1.86937	0	si:dkeyp-84f3.5 [Source:ZFIN;Acc:ZDB-GENE-050208-162]	0	0	protein_coding	FALSE	FALSE
ENSDARG00000043304	nop2	6.74805	3.47161	2.09079	NOP2 nucleolar protein homolog (yeast) [Source:ZFIN;Acc:ZDB-GENE-050309-7]	49	49	protein_coding	FALSE	FALSE
ENSDARG00000056855	GATC	6.74805	2.09314	0.332769	si:rp71-1c23.3 [Source:ZFIN;Acc:ZDB-GENE-060526-381]	40	38	protein_coding	FALSE	FALSE
ENSDARG00000062506	zc3h18	6.74805	5.25392	4.02527	zinc finger CCCH-type containing 18 [Source:ZFIN;Acc:ZDB-GENE-050419-13]	50	50	protein_coding	FALSE	FALSE
ENSDARG00000068431	si.ch211.195h23.3	6.74805	2.37959	0.786289	si:ch211-195h23.3 [Source:ZFIN;Acc:ZDB-GENE-070912-174]	0	0	protein_coding	FALSE	FALSE
ENSDARG00000071683	zfr2	6.74805	2.21944	0.550177	zinc finger RNA binding protein 2 [Source:ZFIN;Acc:ZDB-GENE-070705-184]	38	48	protein_coding	FALSE	FALSE
ENSDARG00000073765	gna13a	6.74805	2.65326	1.15812	guanine nucleotide binding protein (G protein), alpha 13a [Source:ZFIN;Acc:ZDB-GENE-030131-5024]	0	0	protein_coding	FALSE	FALSE
ENSDARG00000079731	kif13ba	6.74805	2.09572	0.337721	kinesin family member 13Ba [Source:ZFIN;Acc:ZDB-GENE-070521-1]	68	69	protein_coding	FALSE	FALSE
ENSDARG00000092033	si.dkey.239h2.3	6.74805	2.2613	0.611927	si:dkey-239h2.3 [Source:ZFIN;Acc:ZDB-GENE-081104-383]	0	0	protein_coding	FALSE	FALSE
ENSDARG00000095705	CDPF1	6.74805	1.73101	0	si:ch211-239e6.4 [Source:ZFIN;Acc:ZDB-GENE-041210-170]	55	54	protein_coding	FALSE	FALSE
ENSDARG00000100481	smg6	6.74805	4.27952	2.93623	SMG6 nonsense mediated mRNA decay factor [Source:ZFIN;Acc:ZDB-GENE-081107-52]	43	43	protein_coding	FALSE	FALSE
ENSDARG00000100887	si.dkey.11f4.20	6.74805	4.17641	2.82959	si:dkey-11f4.20 [Source:ZFIN;Acc:ZDB-GENE-070912-359]	0	0	protein_coding	TRUE	TRUE
ENSDARG00000102762	pik3r5	6.74805	3.03387	1.6149	phosphoinositide-3-kinase, regulatory subunit 5 [Source:ZFIN;Acc:ZDB-GENE-030131-2308]	46	46	protein_coding	FALSE	FALSE
ENSDARG00000103200	gpr107	6.74805	3.87337	2.5082	G protein-coupled receptor 107 [Source:ZFIN;Acc:ZDB-GENE-061103-130]	60	60	protein_coding	TRUE	TRUE
ENSDARG00000103370	lrrc8da	6.74805	2.41843	0.837524	leucine rich repeat containing 8 family, member Da [Source:ZFIN;Acc:ZDB-GENE-061009-26]	0	0	protein_coding	TRUE	FALSE
ENSDARG00000104130	rbm26	6.74805	1.99052	0.138535	RNA binding motif protein 26 [Source:ZFIN;Acc:ZDB-GENE-050706-50]	67	68	protein_coding	FALSE	FALSE
ENSDARG00000003189	psmd1	6.71765	2.76728	1.29711	proteasome 26S subunit, non-ATPase 1 [Source:ZFIN;Acc:ZDB-GENE-040426-810]	8	91	protein_coding	TRUE	FALSE
ENSDARG00000005128	rnaseh2b	6.71765	2.67974	1.18964	ribonuclease H2, subunit B [Source:ZFIN;Acc:ZDB-GENE-040426-1090]	48	47	protein_coding	FALSE	FALSE
ENSDARG00000011360	nfatc2ip	6.71765	2.93781	1.49789	nuclear factor of activated T-cells, cytoplasmic, calcineurin-dependent 2 interacting protein [Source:ZFIN;Acc:ZDB-GENE-030131-9520]	31	31	protein_coding	FALSE	FALSE
ENSDARG00000015385	ndufs3	6.71765	1.6375	0	NADH dehydrogenase (ubiquinone) Fe-S protein 3, (NADH-coenzyme Q reductase) [Source:ZFIN;Acc:ZDB-GENE-050417-274]	75	75	protein_coding	FALSE	FALSE
ENSDARG00000036787	abcb3l1	6.71765	4.32968	2.98849	ATP-binding cassette, sub-family B (MDR/TAP), member 3 like 1 [Source:ZFIN;Acc:ZDB-GENE-030616-245]	41	41	protein_coding	TRUE	FALSE
ENSDARG00000040853	shoc2	6.71765	2.43389	0.860945	SHOC2 leucine-rich repeat scaffold protein [Source:ZFIN;Acc:ZDB-GENE-050208-523]	91	92	protein_coding	FALSE	FALSE
ENSDARG00000052429	syngr2a	6.71765	2.62508	1.1196	synaptogyrin 2a [Source:ZFIN;Acc:ZDB-GENE-070112-1292]	50	51	protein_coding	TRUE	FALSE
ENSDARG00000104676	prkd2	6.71765	4.11453	2.77406	protein kinase D2 [Source:ZFIN;Acc:ZDB-GENE-131120-142]	86	86	protein_coding	FALSE	FALSE
ENSDARG00000001890	STT3B	6.68725	3.59034	2.21577	si:dkey-239i15.3 [Source:ZFIN;Acc:ZDB-GENE-070424-229]	88	89	protein_coding	TRUE	FALSE
ENSDARG00000007523	kmt2e	6.68725	2.21835	0.548976	lysine (K)-specific methyltransferase 2E [Source:ZFIN;Acc:ZDB-GENE-030131-4120]	56	56	protein_coding	FALSE	FALSE
ENSDARG00000008020	med31	6.68725	4.00345	2.65535	mediator complex subunit 31 [Source:ZFIN;Acc:ZDB-GENE-040718-114]	81	80	protein_coding	FALSE	FALSE
ENSDARG00000015905	lztr1	6.68725	4.39716	3.05984	leucine-zipper-like transcription regulator 1 [Source:ZFIN;Acc:ZDB-GENE-030131-9564]	86	87	protein_coding	FALSE	FALSE
ENSDARG00000015915	slc25a36b	6.68725	1.60281	0	solute carrier family 25 (pyrimidine nucleotide carrier ), member 36b [Source:ZFIN;Acc:ZDB-GENE-080219-28]	83	84	protein_coding	TRUE	FALSE
ENSDARG00000018569	tnfrsf1a	6.68725	1.57924	0	tumor necrosis factor receptor superfamily, member 1a [Source:ZFIN;Acc:ZDB-GENE-040426-2252]	22	23	protein_coding	TRUE	TRUE
ENSDARG00000034734	med6	6.68725	4.1272	2.78166	mediator complex subunit 6 [Source:ZFIN;Acc:ZDB-GENE-040625-61]	58	75	protein_coding	FALSE	FALSE
ENSDARG00000037846	hm13	6.68725	2.31162	0.689871	histocompatibility (minor) 13 [Source:ZFIN;Acc:ZDB-GENE-020802-3]	75	75	protein_coding	TRUE	FALSE
ENSDARG00000037958	nosip	6.68725	2.69096	1.20236	nitric oxide synthase interacting protein [Source:ZFIN;Acc:ZDB-GENE-041114-146]	65	65	protein_coding	FALSE	FALSE
ENSDARG00000075774	foxj3	6.68725	3.78851	2.42517	forkhead box J3 [Source:ZFIN;Acc:ZDB-GENE-101005-1]	76	77	protein_coding	FALSE	FALSE
ENSDARG00000092892	si.dkey.23c22.5	6.68725	6.15133	5.04361	si:dkey-23c22.5 [Source:ZFIN;Acc:ZDB-GENE-081105-147]	30	23	protein_coding	TRUE	TRUE
ENSDARG00000103114	ndufa4l2a	6.68725	1.97209	0.102563	NADH dehydrogenase (ubiquinone) 1 alpha subcomplex, 4-like 2a [Source:ZFIN;Acc:ZDB-GENE-070912-358]	61	59	protein_coding	TRUE	FALSE
ENSDARG00000103846	hspa5	6.68725	2.52571	0.983272	heat shock protein 5 [Source:ZFIN;Acc:ZDB-GENE-031001-11]	92	92	protein_coding	FALSE	TRUE
ENSDARG00000104048	CR388042.2	6.68725	2.90658	1.46253		0	0	protein_coding	FALSE	FALSE
ENSDARG00000004527	pin4	6.65686	3.33725	1.94852	protein (peptidylprolyl cis/trans isomerase) NIMA-interacting, 4 (parvulin) [Source:ZFIN;Acc:ZDB-GENE-050522-117]	84	83	protein_coding	FALSE	FALSE
ENSDARG00000015638	gemin2	6.65686	3.39844	2.02287	gem (nuclear organelle) associated protein 2 [Source:ZFIN;Acc:ZDB-GENE-030131-3756]	68	68	protein_coding	FALSE	FALSE
ENSDARG00000018726	slco3a1	6.65686	3.40126	2.02467	solute carrier organic anion transporter family, member 3A1 [Source:ZFIN;Acc:ZDB-GENE-030131-8662]	77	77	protein_coding	TRUE	FALSE
ENSDARG00000021582	dynlrb1	6.65686	4.07009	2.72206	dynein, light chain, roadblock-type 1 [Source:ZFIN;Acc:ZDB-GENE-040426-989]	78	80	protein_coding	FALSE	FALSE
ENSDARG00000025554	WDR83OS	6.65686	2.51459	0.965188	zgc:73111 [Source:ZFIN;Acc:ZDB-GENE-040426-1674]	88	88	protein_coding	TRUE	FALSE
ENSDARG00000030964	pde12	6.65686	2.69661	1.20827	phosphodiesterase 12 [Source:ZFIN;Acc:ZDB-GENE-060519-25]	56	57	protein_coding	FALSE	FALSE
ENSDARG00000034826	park7	6.65686	4.22759	2.87761	parkinson protein 7 [Source:ZFIN;Acc:ZDB-GENE-041010-5]	81	83	protein_coding	FALSE	FALSE
ENSDARG00000037861	slc2a3b	6.65686	2.7816	1.31421	solute carrier family 2 (facilitated glucose transporter), member 3b [Source:ZFIN;Acc:ZDB-GENE-121031-5]	0	0	protein_coding	TRUE	FALSE
ENSDARG00000041306	mrps25	6.65686	2.94185	1.5033	mitochondrial ribosomal protein S25 [Source:ZFIN;Acc:ZDB-GENE-050417-52]	75	74	protein_coding	FALSE	FALSE
ENSDARG00000045660	hic1l	6.65686	5.8013	4.65433	hypermethylated in cancer 1 like [Source:ZFIN;Acc:ZDB-GENE-030620-1]	49	48	protein_coding	FALSE	FALSE
ENSDARG00000056531	nutf2	6.65686	4.06767	2.72206	nuclear transport factor 2 [Source:ZFIN;Acc:ZDB-GENE-041010-77]	92	92	protein_coding	FALSE	FALSE
ENSDARG00000074759	ccar1	6.65686	2.85286	1.4036	cell division cycle and apoptosis regulator 1 [Source:ZFIN;Acc:ZDB-GENE-030131-146]	65	66	protein_coding	FALSE	FALSE
ENSDARG00000078734	myo1f	6.65686	2.69093	1.20236	myosin IF [Source:ZFIN;Acc:ZDB-GENE-081104-506]	76	76	protein_coding	FALSE	FALSE
ENSDARG00000018593	parp16	6.62646	2.34749	0.743904	poly (ADP-ribose) polymerase family, member 16 [Source:ZFIN;Acc:ZDB-GENE-040426-2289]	58	58	protein_coding	TRUE	FALSE
ENSDARG00000026767	nol11	6.62646	4.32371	2.98376	nucleolar protein 11 [Source:ZFIN;Acc:ZDB-GENE-030131-419]	38	39	protein_coding	FALSE	FALSE
ENSDARG00000034670	ube2e2	6.62646	3.21162	1.80711	ubiquitin-conjugating enzyme E2E 2 [Source:ZFIN;Acc:ZDB-GENE-040801-237]	89	90	protein_coding	FALSE	FALSE
ENSDARG00000037514	hdac3	6.62646	2.51609	0.967045	histone deacetylase 3 [Source:ZFIN;Acc:ZDB-GENE-040426-847]	93	93	protein_coding	FALSE	FALSE
ENSDARG00000043932	stmn4l	6.62646	2.7274	1.24936	stathmin-like 4, like [Source:ZFIN;Acc:ZDB-GENE-040718-301]	75	75	protein_coding	FALSE	FALSE
ENSDARG00000046006	med20	6.62646	3.48129	2.10054	mediator complex subunit 20 [Source:ZFIN;Acc:ZDB-GENE-040801-104]	48	67	protein_coding	FALSE	FALSE
ENSDARG00000063417	erf	6.62646	3.07462	1.66097	Ets2 repressor factor [Source:ZFIN;Acc:ZDB-GENE-010724-17]	59	58	protein_coding	FALSE	FALSE
ENSDARG00000067741	itpkcb	6.62646	3.02509	1.6053	inositol-trisphosphate 3-kinase Cb [Source:ZFIN;Acc:ZDB-GENE-080225-27]	50	50	protein_coding	FALSE	FALSE
ENSDARG00000087937	cdk4	6.62646	3.19278	1.78893	cyclin-dependent kinase 4 [Source:ZFIN;Acc:ZDB-GENE-060929-974]	73	73	protein_coding	FALSE	FALSE
ENSDARG00000095879	wdr46	6.62646	2.34839	0.74413	WD repeat domain 46 [Source:ZFIN;Acc:ZDB-GENE-040426-1264]	55	54	protein_coding	FALSE	FALSE
ENSDARG00000101036	traf2b	6.62646	1.56095	0	Tnf receptor-associated factor 2b [Source:ZFIN;Acc:ZDB-GENE-030131-5345]	0	0	protein_coding	FALSE	FALSE
ENSDARG00000101719	pargl	6.62646	3.60789	2.23507	poly (ADP-ribose) glycohydrolase, like [Source:ZFIN;Acc:ZDB-GENE-090313-286]	0	0	protein_coding	FALSE	FALSE
ENSDARG00000102468	si.dkey.71l4.5	6.62646	1.73026	0	si:dkey-71l4.5 [Source:ZFIN;Acc:ZDB-GENE-120703-15]	0	0	protein_coding	FALSE	FALSE
ENSDARG00000102618	utp18	6.62646	1.93628	0.0279707	UTP18 small subunit (SSU) processome component [Source:ZFIN;Acc:ZDB-GENE-060929-668]	44	45	protein_coding	FALSE	FALSE
ENSDARG00000104512	si.dkey.22a24.7	6.62646	1.9254	0.00966599	si:dkey-22a24.7 [Source:ZFIN;Acc:ZDB-GENE-141211-59]	0	0	lincRNA	NA	NA
ENSDARG00000013729	srsf6a	6.59606	3.50543	2.12336	serine/arginine-rich splicing factor 6a [Source:ZFIN;Acc:ZDB-GENE-040426-2824]	68	70	protein_coding	FALSE	FALSE
ENSDARG00000024933	spast	6.59606	3.0708	1.65916	spastin [Source:ZFIN;Acc:ZDB-GENE-040426-2331]	65	66	protein_coding	FALSE	FALSE
ENSDARG00000039429	adka	6.59606	2.99559	1.57433	adenosine kinase a [Source:ZFIN;Acc:ZDB-GENE-030425-3]	78	78	protein_coding	FALSE	FALSE
ENSDARG00000063003	alkbh5	6.59606	5.78932	4.64276	alkB homolog 5, RNA demethylase [Source:ZFIN;Acc:ZDB-GENE-061013-602]	74	74	protein_coding	FALSE	FALSE
ENSDARG00000069289	gabpa	6.59606	2.94965	1.51379	GA binding protein transcription factor, alpha subunit [Source:ZFIN;Acc:ZDB-GENE-011010-2]	74	75	protein_coding	FALSE	FALSE
ENSDARG00000074311	mast2	6.59606	2.73921	1.26292	microtubule associated serine/threonine kinase 2 [Source:ZFIN;Acc:ZDB-GENE-050309-150]	63	62	protein_coding	FALSE	FALSE
ENSDARG00000079605	prmt5	6.59606	3.99878	2.65137	protein arginine methyltransferase 5 [Source:ZFIN;Acc:ZDB-GENE-030616-585]	79	79	protein_coding	FALSE	FALSE
ENSDARG00000098464	CABZ01060490.1	6.59606	1.56854	0		0	0	protein_coding	FALSE	FALSE
ENSDARG00000100129	brd3b	6.59606	3.70593	2.34036	bromodomain containing 3b [Source:ZFIN;Acc:ZDB-GENE-030131-5316]	78	79	protein_coding	FALSE	FALSE
ENSDARG00000100487	nploc4	6.59606	2.56647	1.04021	NPL4 homolog, ubiquitin recognition factor [Source:ZFIN;Acc:ZDB-GENE-030131-5658]	81	81	protein_coding	FALSE	FALSE
ENSDARG00000103648	znf536	6.59606	4.7465	3.44183	zinc finger protein 536 [Source:ZFIN;Acc:ZDB-GENE-030616-624]	50	50	protein_coding	FALSE	FALSE
ENSDARG00000104596	gtf2a1l.1	6.59606	3.21293	1.80843	general transcription factor IIA, 1-like [Source:ZFIN;Acc:ZDB-GENE-060929-28]	22	21	protein_coding	FALSE	FALSE
ENSDARG00000007989	nedd8	6.56567	3.29054	1.89766	neural precursor cell expressed, developmentally down-regulated 8 [Source:ZFIN;Acc:ZDB-GENE-030616-588]	84	84	protein_coding	FALSE	FALSE
ENSDARG00000009262	FAR2	6.56567	1.70213	0	si:dkey-97m3.1 [Source:ZFIN;Acc:ZDB-GENE-060503-367]	58	61	protein_coding	TRUE	FALSE
ENSDARG00000010823	memo1	6.56567	2.79557	1.33038	mediator of cell motility 1 [Source:ZFIN;Acc:ZDB-GENE-030131-5571]	88	89	protein_coding	FALSE	FALSE
ENSDARG00000011909	itpr2	6.56567	2.53075	0.990629	inositol 1,4,5-trisphosphate receptor, type 2 [Source:ZFIN;Acc:ZDB-GENE-050419-192]	75	75	protein_coding	FALSE	FALSE
ENSDARG00000012274	eif4e1c	6.56567	1.99612	0.14835	eukaryotic translation initiation factor 4E family member 1c [Source:ZFIN;Acc:ZDB-GENE-050417-398]	0	0	protein_coding	FALSE	FALSE
ENSDARG00000013117	hiat1a	6.56567	1.51994	0	hippocampus abundant transcript 1a [Source:ZFIN;Acc:ZDB-GENE-030131-834]	0	0	protein_coding	TRUE	FALSE
ENSDARG00000015921	pwp1	6.56567	3.94555	2.59724	PWP1 homolog (S. cerevisiae) [Source:ZFIN;Acc:ZDB-GENE-040426-1049]	69	70	protein_coding	FALSE	FALSE
ENSDARG00000025703	dmgdh	6.56567	2.25615	0.604439	dimethylglycine dehydrogenase [Source:ZFIN;Acc:ZDB-GENE-080227-8]	65	66	protein_coding	FALSE	FALSE
ENSDARG00000029043	nupl2	6.56567	3.13818	1.73383	nucleoporin like 2 [Source:ZFIN;Acc:ZDB-GENE-040426-2292]	37	38	protein_coding	FALSE	FALSE
ENSDARG00000029885	rab41	6.56567	2.28411	0.64746	RAB41, member RAS oncogene family [Source:ZFIN;Acc:ZDB-GENE-040426-2686]	0	0	protein_coding	FALSE	FALSE
ENSDARG00000030368	naa15b	6.56567	2.4888	0.933983	N(alpha)-acetyltransferase 15, NatA auxiliary subunit b [Source:ZFIN;Acc:ZDB-GENE-030131-6031]	84	84	protein_coding	FALSE	FALSE
ENSDARG00000038006	osr2	6.56567	4.17353	2.82711	odd-skipped related transciption factor 2 [Source:ZFIN;Acc:ZDB-GENE-050417-183]	76	73	protein_coding	FALSE	FALSE
ENSDARG00000039185	nfyba	6.56567	3.65543	2.28558	nuclear transcription factor Y, beta a [Source:ZFIN;Acc:ZDB-GENE-050417-13]	79	79	protein_coding	FALSE	FALSE
ENSDARG00000042252	eif4h	6.56567	2.43715	0.864505	eukaryotic translation initiation factor 4h [Source:ZFIN;Acc:ZDB-GENE-010328-19]	70	70	protein_coding	FALSE	FALSE
ENSDARG00000052966	nmt1a	6.56567	2.24648	0.590094	N-myristoyltransferase 1a [Source:ZFIN;Acc:ZDB-GENE-050522-477]	79	80	protein_coding	FALSE	FALSE
ENSDARG00000055792	foxo4	6.56567	1.83319	0	forkhead box O4 [Source:ZFIN;Acc:ZDB-GENE-150311-1]	38	38	protein_coding	FALSE	FALSE
ENSDARG00000086341	COX7A2..1.to.many.	6.56567	3.07242	1.66039	cytochrome c oxidase subunit VIIa polypeptide 2 (liver) [Source:HGNC Symbol;Acc:HGNC:2288]	60	57	protein_coding	TRUE	FALSE
ENSDARG00000091001	mycbp	6.56567	3.51275	2.1304	c-myc binding protein [Source:ZFIN;Acc:ZDB-GENE-060331-97]	52	52	protein_coding	FALSE	FALSE
ENSDARG00000100242	dph5	6.56567	3.47143	2.09079	diphthamide biosynthesis 5 [Source:ZFIN;Acc:ZDB-GENE-041114-85]	75	74	protein_coding	FALSE	FALSE
ENSDARG00000105037	snrpf	6.56567	2.08007	0.30925	small nuclear ribonucleoprotein polypeptide F [Source:ZFIN;Acc:ZDB-GENE-040930-9]	95	95	protein_coding	FALSE	FALSE
ENSDARG00000002097	si.dkeyp.52c3.7	6.53527	2.05492	0.259929	si:dkeyp-52c3.7 [Source:ZFIN;Acc:ZDB-GENE-110411-213]	0	0	protein_coding	FALSE	FALSE
ENSDARG00000005315	celf1	6.53527	1.85117	0	cugbp, Elav-like family member 1 [Source:ZFIN;Acc:ZDB-GENE-000501-1]	79	79	protein_coding	FALSE	FALSE
ENSDARG00000006758	fam234b	6.53527	1.74169	0	family with sequence similarity 234, member B [Source:ZFIN;Acc:ZDB-GENE-030131-3308]	32	33	protein_coding	TRUE	FALSE
ENSDARG00000015807	rab22a	6.53527	2.71647	1.23499	RAB22A, member RAS oncogene family [Source:ZFIN;Acc:ZDB-GENE-041114-161]	86	87	protein_coding	FALSE	FALSE
ENSDARG00000016163	usp33	6.53527	2.75563	1.28434	ubiquitin specific peptidase 33 [Source:ZFIN;Acc:ZDB-GENE-040426-2323]	71	71	protein_coding	FALSE	FALSE
ENSDARG00000017842	syvn1	6.53527	3.32306	1.93543	synovial apoptosis inhibitor 1, synoviolin [Source:ZFIN;Acc:ZDB-GENE-030131-7166]	66	65	protein_coding	TRUE	FALSE
ENSDARG00000021059	alas1	6.53527	2.16837	0.467992	aminolevulinate, delta-, synthase 1 [Source:ZFIN;Acc:ZDB-GENE-001229-2]	74	74	protein_coding	FALSE	FALSE
ENSDARG00000024669	oser1	6.53527	2.22128	0.553036	oxidative stress responsive serine-rich 1 [Source:ZFIN;Acc:ZDB-GENE-040426-1325]	45	45	protein_coding	FALSE	FALSE
ENSDARG00000024895	fam50a	6.53527	3.89749	2.54061	family with sequence similarity 50, member A [Source:ZFIN;Acc:ZDB-GENE-050417-110]	73	86	protein_coding	FALSE	FALSE
ENSDARG00000039452	hk1	6.53527	2.57302	1.04884	hexokinase 1 [Source:ZFIN;Acc:ZDB-GENE-040426-2848]	81	83	protein_coding	FALSE	FALSE
ENSDARG00000052606	dpp9	6.53527	2.73394	1.2555	dipeptidyl-peptidase 9 [Source:ZFIN;Acc:ZDB-GENE-061013-777]	78	80	protein_coding	FALSE	FALSE
ENSDARG00000062164	atrn	6.53527	4.6969	3.38925	attractin [Source:ZFIN;Acc:ZDB-GENE-090312-21]	71	71	protein_coding	TRUE	FALSE
ENSDARG00000069968	pcsk7	6.53527	2.26705	0.621262	proprotein convertase subtilisin/kexin type 7 [Source:ZFIN;Acc:ZDB-GENE-030131-7293]	62	63	protein_coding	FALSE	TRUE
ENSDARG00000076518	mettl1	6.53527	3.64344	2.27391	methyltransferase like 1 [Source:ZFIN;Acc:ZDB-GENE-041010-24]	76	75	protein_coding	FALSE	FALSE
ENSDARG00000088439	gm2a	6.53527	2.32632	0.711547	GM2 ganglioside activator [Source:ZFIN;Acc:ZDB-GENE-050417-373]	50	47	protein_coding	TRUE	TRUE
ENSDARG00000091198	urm1	6.53527	3.06786	1.65661	ubiquitin related modifier 1 [Source:ZFIN;Acc:ZDB-GENE-091204-300]	76	60	protein_coding	FALSE	FALSE
ENSDARG00000098544	ncdn	6.53527	2.10674	0.357496	neurochondrin [Source:ZFIN;Acc:ZDB-GENE-061220-6]	35	35	protein_coding	FALSE	FALSE
ENSDARG00000026369	dbi	6.50487	3.63871	2.26892	diazepam binding inhibitor (GABA receptor modulator, acyl-CoA binding protein) [Source:ZFIN;Acc:ZDB-GENE-040426-1861]	52	77	protein_coding	FALSE	FALSE
ENSDARG00000035324	hnrpl	6.50487	1.7246	0	heterogeneous nuclear ribonucleoprotein L [Source:ZFIN;Acc:ZDB-GENE-040426-710]	77	27	protein_coding	FALSE	FALSE
ENSDARG00000035679	si.rp71.45k5.4	6.50487	1.79366	0	si:rp71-45k5.4 [Source:ZFIN;Acc:ZDB-GENE-060503-941]	92	93	protein_coding	FALSE	FALSE
ENSDARG00000037108	pfdn6	6.50487	2.50794	0.957251	prefoldin subunit 6 [Source:ZFIN;Acc:ZDB-GENE-040426-1589]	72	72	protein_coding	FALSE	FALSE
ENSDARG00000069780	pus7l	6.50487	3.73404	2.37097	pseudouridylate synthase 7-like [Source:ZFIN;Acc:ZDB-GENE-050419-188]	48	48	protein_coding	FALSE	FALSE
ENSDARG00000098334	exosc3	6.50487	3.33107	1.94511	exosome component 3 [Source:ZFIN;Acc:ZDB-GENE-050706-140]	61	61	protein_coding	FALSE	FALSE
ENSDARG00000098410	si.dkey.19b23.10	6.50487	2.72099	1.2404	si:dkey-19b23.10 [Source:ZFIN;Acc:ZDB-GENE-141219-47]	0	0	protein_coding	FALSE	FALSE
ENSDARG00000098897	pds5b	6.50487	1.58369	0	PDS5 cohesin associated factor B [Source:ZFIN;Acc:ZDB-GENE-091217-2]	81	81	protein_coding	FALSE	FALSE
ENSDARG00000105261	nfkb1	6.50487	3.11707	1.71069	nuclear factor of kappa light polypeptide gene enhancer in B-cells 1 [Source:ZFIN;Acc:ZDB-GENE-121204-3]	54	56	protein_coding	FALSE	FALSE
ENSDARG00000007285	mrpl57	6.47448	3.70657	2.34036	mitochondrial ribosomal protein L57 [Source:ZFIN;Acc:ZDB-GENE-040426-1745]	54	55	protein_coding	FALSE	FALSE
ENSDARG00000007755	wdr61	6.47448	2.69873	1.21144	WD repeat domain 61 [Source:ZFIN;Acc:ZDB-GENE-040426-1851]	65	66	protein_coding	TRUE	FALSE
ENSDARG00000018691	phf2	6.47448	5.14633	3.90895	PHD finger protein 2 [Source:ZFIN;Acc:ZDB-GENE-050302-10]	67	68	protein_coding	FALSE	FALSE
ENSDARG00000039225	vps13a	6.47448	2.60578	1.09385	vacuolar protein sorting 13 homolog A (S. cerevisiae) [Source:ZFIN;Acc:ZDB-GENE-030926-1]	55	56	protein_coding	FALSE	FALSE
ENSDARG00000044225	si.dkey.27b3.2	6.47448	2.84052	1.39128	si:dkey-27b3.2 [Source:ZFIN;Acc:ZDB-GENE-091117-10]	86	85	protein_coding	FALSE	FALSE
ENSDARG00000052840	ndufs4	6.47448	3.03992	1.62205	NADH dehydrogenase (ubiquinone) Fe-S protein 4, (NADH-coenzyme Q reductase) [Source:ZFIN;Acc:ZDB-GENE-050522-421]	71	70	protein_coding	FALSE	FALSE
ENSDARG00000061952	si.dkey.245p14.7	6.47448	1.64475	0	si:dkey-245p14.7 [Source:ZFIN;Acc:ZDB-GENE-061207-66]	72	73	protein_coding	FALSE	FALSE
ENSDARG00000062401	znf319	6.47448	2.78041	1.31279	zinc finger protein 319 [Source:ZFIN;Acc:ZDB-GENE-090406-2]	65	65	protein_coding	FALSE	FALSE
ENSDARG00000062575	si.ch211.210g13.5	6.47448	2.99678	1.57447	si:ch211-210g13.5 [Source:ZFIN;Acc:ZDB-GENE-030131-5675]	0	0	protein_coding	FALSE	FALSE
ENSDARG00000092728	si.dkey.266f7.4	6.47448	6.15224	5.04361	si:dkey-266f7.4 [Source:ZFIN;Acc:ZDB-GENE-070705-436]	0	0	protein_coding	FALSE	FALSE
ENSDARG00000104733	coq4	6.47448	2.24696	0.590561	coenzyme Q4 homolog (S. cerevisiae) [Source:ZFIN;Acc:ZDB-GENE-060526-218]	55	55	protein_coding	FALSE	FALSE
ENSDARG00000006848	PARP9	6.44408	3.41248	2.03618	si:ch211-219a4.6 [Source:ZFIN;Acc:ZDB-GENE-081104-179]	30	32	protein_coding	FALSE	FALSE
ENSDARG00000016263	zdhhc5a	6.44408	3.06792	1.65661	zinc finger, DHHC-type containing 5a [Source:ZFIN;Acc:ZDB-GENE-090312-92]	56	56	protein_coding	TRUE	FALSE
ENSDARG00000017244	chd6	6.44408	3.15238	1.74715	chromodomain helicase DNA binding protein 6 [Source:ZFIN;Acc:ZDB-GENE-130530-559]	52	53	protein_coding	FALSE	FALSE
ENSDARG00000037488	canx	6.44408	3.07987	1.66693	calnexin [Source:ZFIN;Acc:ZDB-GENE-040426-2797]	68	69	protein_coding	TRUE	TRUE
ENSDARG00000046071	zgc.77838	6.44408	3.56633	2.19148	zgc:77838 [Source:ZFIN;Acc:ZDB-GENE-040426-1889]	47	48	protein_coding	FALSE	FALSE
ENSDARG00000058030	hspa14	6.44408	2.0016	0.155972	heat shock protein 14 [Source:ZFIN;Acc:ZDB-GENE-041210-73]	69	70	protein_coding	FALSE	FALSE
ENSDARG00000069603	taok1a	6.44408	2.4528	0.882757	TAO kinase 1a [Source:ZFIN;Acc:ZDB-GENE-130103-9]	84	84	protein_coding	FALSE	FALSE
ENSDARG00000077093	scaf4a	6.44408	2.95234	1.51549	SR-related CTD-associated factor 4a [Source:ZFIN;Acc:ZDB-GENE-030131-9003]	50	51	protein_coding	FALSE	FALSE
ENSDARG00000097266	si.ch211.229g11.5	6.44408	2.41938	0.838503	si:ch211-229g11.5 [Source:ZFIN;Acc:ZDB-GENE-131119-84]	0	0	processed_transcript	NA	NA
ENSDARG00000099177	dok1b	6.44408	2.49272	0.937585	docking protein 1b [Source:ZFIN;Acc:ZDB-GENE-040426-2063]	30	31	protein_coding	FALSE	FALSE
ENSDARG00000100534	irak4	6.44408	4.30346	2.95914	interleukin-1 receptor-associated kinase 4 [Source:ZFIN;Acc:ZDB-GENE-040426-738]	43	43	protein_coding	FALSE	FALSE
ENSDARG00000013863	fam133b	6.41368	2.36342	0.765261	family with sequence similarity 133, member B [Source:ZFIN;Acc:ZDB-GENE-060503-229]	57	60	protein_coding	FALSE	FALSE
ENSDARG00000014165	ssr3	6.41368	2.15854	0.450463	signal sequence receptor, gamma [Source:ZFIN;Acc:ZDB-GENE-030131-9134]	95	95	protein_coding	TRUE	FALSE
ENSDARG00000017843	srsf1b	6.41368	2.34016	0.732419	serine/arginine-rich splicing factor 1b [Source:ZFIN;Acc:ZDB-GENE-040426-1467]	92	92	protein_coding	FALSE	FALSE
ENSDARG00000028386	htatip2	6.41368	1.9796	0.119338	HIV-1 Tat interactive protein 2 [Source:ZFIN;Acc:ZDB-GENE-001219-1]	64	64	protein_coding	FALSE	FALSE
ENSDARG00000037353	frs2b	6.41368	2.39723	0.809995	fibroblast growth factor receptor substrate 2b [Source:ZFIN;Acc:ZDB-GENE-040718-406]	58	59	protein_coding	FALSE	FALSE
ENSDARG00000052361	il15	6.41368	4.57174	3.2551	interleukin 15 [Source:ZFIN;Acc:ZDB-GENE-060213-2]	0	0	protein_coding	FALSE	TRUE
ENSDARG00000078802	rnf111	6.41368	2.64485	1.14596	ring finger protein 111 [Source:ZFIN;Acc:ZDB-GENE-070808-2]	52	53	protein_coding	FALSE	FALSE
ENSDARG00000089681	btf3l4	6.41368	2.41812	0.837489	basic transcription factor 3-like 4 [Source:ZFIN;Acc:ZDB-GENE-040426-1650]	89	89	protein_coding	FALSE	FALSE
ENSDARG00000089904	adgre5b.3	6.41368	2.94934	1.51379	adhesion G protein-coupled receptor E5b, duplicate 3 [Source:ZFIN;Acc:ZDB-GENE-121214-275]	30	34	protein_coding	TRUE	TRUE
ENSDARG00000091777	mapkap1	6.41368	3.59475	2.2194	mitogen-activated protein kinase associated protein 1 [Source:ZFIN;Acc:ZDB-GENE-041111-178]	80	81	protein_coding	FALSE	FALSE
ENSDARG00000092448	si.dkey.220o10.1	6.41368	2.89255	1.44666	si:dkey-220o10.1 [Source:ZFIN;Acc:ZDB-GENE-060531-108]	0	0	processed_transcript	NA	NA
ENSDARG00000041081	suv420h1	6.38329	1.9308	0.0194604	suppressor of variegation 4-20 homolog 1 (Drosophila) [Source:ZFIN;Acc:ZDB-GENE-041114-22]	55	57	protein_coding	FALSE	FALSE
ENSDARG00000042995	sptlc1	6.38329	2.32634	0.711547	serine palmitoyltransferase, long chain base subunit 1 [Source:ZFIN;Acc:ZDB-GENE-050522-61]	78	79	protein_coding	TRUE	FALSE
ENSDARG00000043357	tbl2	6.38329	6.17395	5.05998	transducin (beta)-like 2 [Source:ZFIN;Acc:ZDB-GENE-030131-9012]	62	62	protein_coding	TRUE	TRUE
ENSDARG00000046048	vapal	6.38329	3.0279	1.6072	VAMP (vesicle-associated membrane protein)-associated protein A, like [Source:ZFIN;Acc:ZDB-GENE-040718-281]	71	72	protein_coding	TRUE	FALSE
ENSDARG00000060521	rbm27	6.38329	3.77895	2.42065	RNA binding motif protein 27 [Source:ZFIN;Acc:ZDB-GENE-110411-31]	52	52	protein_coding	FALSE	FALSE
ENSDARG00000070866	tmem11	6.38329	5.16321	3.92268	transmembrane protein 11 [Source:ZFIN;Acc:ZDB-GENE-050417-37]	82	83	protein_coding	FALSE	FALSE
ENSDARG00000077728	supv3l1	6.38329	3.08811	1.67812	SUV3-like helicase [Source:ZFIN;Acc:ZDB-GENE-030131-2838]	68	69	protein_coding	FALSE	FALSE
ENSDARG00000093117	si.dkey.266m15.7	6.38329	2.86159	1.41148	si:dkey-266m15.7 [Source:ZFIN;Acc:ZDB-GENE-070705-444]	0	0	protein_coding	FALSE	FALSE
ENSDARG00000099366	supt4h1	6.38329	2.66782	1.17657	SPT4 homolog, DSIF elongation factor subunit [Source:ZFIN;Acc:ZDB-GENE-040718-214]	86	86	protein_coding	FALSE	FALSE
ENSDARG00000099932	si.dkey.56m15.4	6.38329	2.23366	0.571172	si:dkey-56m15.4 [Source:ZFIN;Acc:ZDB-GENE-110914-99]	0	0	processed_transcript	NA	NA
ENSDARG00000101137	znf999	6.38329	2.85575	1.40473	zinc finger protein 999 [Source:ZFIN;Acc:ZDB-GENE-110913-39]	0	0	protein_coding	FALSE	FALSE
ENSDARG00000001888	ppm1ba	6.35289	2.99722	1.57447	protein phosphatase, Mg2+/Mn2+ dependent, 1Ba [Source:ZFIN;Acc:ZDB-GENE-991102-16]	76	76	protein_coding	FALSE	FALSE
ENSDARG00000032157	grk6	6.35289	3.71489	2.34821	G protein-coupled receptor kinase 6 [Source:ZFIN;Acc:ZDB-GENE-101006-5]	81	82	protein_coding	FALSE	FALSE
ENSDARG00000033489	ube2j1	6.35289	2.35495	0.752734	ubiquitin-conjugating enzyme E2, J1 [Source:ZFIN;Acc:ZDB-GENE-040426-2853]	67	68	protein_coding	TRUE	FALSE
ENSDARG00000039754	xpc	6.35289	2.3363	0.726254	xeroderma pigmentosum, complementation group C [Source:ZFIN;Acc:ZDB-GENE-030131-8461]	47	47	protein_coding	FALSE	FALSE
ENSDARG00000068681	crfb1	6.35289	2.36662	0.767907	cytokine receptor family member b1 [Source:ZFIN;Acc:ZDB-GENE-030131-8673]	0	0	protein_coding	TRUE	FALSE
ENSDARG00000092787	TMEM261	6.35289	3.26145	1.8632	si:dkey-88p24.11 [Source:ZFIN;Acc:ZDB-GENE-030131-8991]	34	36	protein_coding	TRUE	FALSE
ENSDARG00000101521	UBE2M	6.35289	3.01264	1.591	si:ch1073-205c8.4 [Source:ZFIN;Acc:ZDB-GENE-141219-17]	90	90	protein_coding	FALSE	FALSE
ENSDARG00000012387	pdha1a	6.32249	3.20582	1.80172	pyruvate dehydrogenase (lipoamide) alpha 1a [Source:ZFIN;Acc:ZDB-GENE-040426-2719]	68	72	protein_coding	FALSE	FALSE
ENSDARG00000015057	ube2d4	6.32249	3.32213	1.93504	ubiquitin-conjugating enzyme E2D 4 (putative) [Source:ZFIN;Acc:ZDB-GENE-070424-86]	83	99	protein_coding	FALSE	FALSE
ENSDARG00000027172	phactr2	6.32249	4.60868	3.29882	phosphatase and actin regulator 2 [Source:ZFIN;Acc:ZDB-GENE-040724-11]	44	47	protein_coding	FALSE	FALSE
ENSDARG00000034714	esyt1a	6.32249	2.34789	0.74413	extended synaptotagmin-like protein 1a [Source:ZFIN;Acc:ZDB-GENE-090311-55]	53	53	protein_coding	TRUE	FALSE
ENSDARG00000060489	mrpl32	6.32249	2.67482	1.18318	mitochondrial ribosomal protein L32 [Source:ZFIN;Acc:ZDB-GENE-060825-188]	43	57	protein_coding	FALSE	FALSE
ENSDARG00000074346	l3mbtl1b	6.32249	3.00423	1.5799	l(3)mbt-like 1b (Drosophila) [Source:ZFIN;Acc:ZDB-GENE-100922-38]	0	0	protein_coding	FALSE	FALSE
ENSDARG00000078785	tmem258	6.32249	2.35196	0.74842	transmembrane protein 258 [Source:ZFIN;Acc:ZDB-GENE-040426-1739]	92	92	protein_coding	TRUE	FALSE
ENSDARG00000087979	si.dkey.245g22.3	6.32249	2.07005	0.289775	si:dkey-245g22.3 [Source:ZFIN;Acc:ZDB-GENE-131120-186]	0	0	antisense	NA	NA
ENSDARG00000093972	ftr79	6.32249	3.67927	2.31467	finTRIM family, member 79 [Source:ZFIN;Acc:ZDB-GENE-060126-4]	0	0	protein_coding	FALSE	FALSE
ENSDARG00000103106	trappc9	6.32249	3.48156	2.10054	trafficking protein particle complex 9 [Source:ZFIN;Acc:ZDB-GENE-070705-261]	62	63	protein_coding	FALSE	FALSE
ENSDARG00000103598	siva1	6.32249	4.5522	3.23357	SIVA1, apoptosis-inducing factor [Source:ZFIN;Acc:ZDB-GENE-050506-57]	40	41	protein_coding	FALSE	FALSE
ENSDARG00000104462	SLC35E2	6.32249	3.83978	2.4777	si:ch73-236j9.2 [Source:ZFIN;Acc:ZDB-GENE-131127-309]	63	59	protein_coding	TRUE	FALSE
ENSDARG00000006915	arl8ba	6.2921	3.60007	2.22637	ADP-ribosylation factor-like 8Ba [Source:ZFIN;Acc:ZDB-GENE-030131-9370]	97	97	protein_coding	FALSE	FALSE
ENSDARG00000038901	tmem256	6.2921	1.80499	0	transmembrane protein 256 [Source:ZFIN;Acc:ZDB-GENE-050417-92]	48	29	protein_coding	TRUE	FALSE
ENSDARG00000045155	phf5a	6.2921	2.12922	0.394905	PHD finger protein 5A [Source:ZFIN;Acc:ZDB-GENE-021219-3]	100	100	protein_coding	FALSE	FALSE
ENSDARG00000056649	htatsf1	6.2921	2.55516	1.02503	HIV-1 Tat specific factor 1 [Source:ZFIN;Acc:ZDB-GENE-040426-1578]	54	54	protein_coding	FALSE	FALSE
ENSDARG00000076618	tm2d3	6.2921	2.87364	1.42931	TM2 domain containing 3 [Source:ZFIN;Acc:ZDB-GENE-070620-20]	56	55	protein_coding	TRUE	TRUE
ENSDARG00000102873	CT956002.1	6.2921	2.50547	0.955167		0	0	protein_coding	FALSE	TRUE
ENSDARG00000003841	usb1	6.2617	3.14495	1.74034	U6 snRNA biogenesis 1 [Source:ZFIN;Acc:ZDB-GENE-040801-197]	44	45	protein_coding	FALSE	FALSE
ENSDARG00000009142	ppp1r13bb	6.2617	2.33482	0.723805	protein phosphatase 1, regulatory subunit 13Bb [Source:ZFIN;Acc:ZDB-GENE-030131-4327]	64	63	protein_coding	FALSE	FALSE
ENSDARG00000025319	fynb	6.2617	2.78327	1.3159	FYN proto-oncogene, Src family tyrosine kinase b [Source:ZFIN;Acc:ZDB-GENE-050706-89]	90	90	protein_coding	FALSE	FALSE
ENSDARG00000040286	ubl7b	6.2617	2.6877	1.199	ubiquitin-like 7b (bone marrow stromal cell-derived) [Source:ZFIN;Acc:ZDB-GENE-040426-1334]	62	61	protein_coding	FALSE	FALSE
ENSDARG00000069109	sssca1	6.2617	3.19253	1.78893	Sjogren syndrome/scleroderma autoantigen 1 [Source:ZFIN;Acc:ZDB-GENE-041010-102]	56	54	protein_coding	FALSE	FALSE
ENSDARG00000092510	si.dkey.47k20.6	6.2617	2.40747	0.819927	si:dkey-47k20.6 [Source:ZFIN;Acc:ZDB-GENE-060503-170]	0	0	processed_transcript	NA	NA
ENSDARG00000016153	dag1	6.2313	2.78159	1.31421	dystroglycan 1 [Source:ZFIN;Acc:ZDB-GENE-021223-1]	61	61	protein_coding	TRUE	FALSE
ENSDARG00000036685	ccnt2a	6.2313	3.33972	1.95097	cyclin T2a [Source:ZFIN;Acc:ZDB-GENE-030131-5779]	66	66	protein_coding	FALSE	FALSE
ENSDARG00000054055	ostn	6.2313	2.21588	0.545316	osteocrin [Source:ZFIN;Acc:ZDB-GENE-121211-2]	37	44	protein_coding	FALSE	TRUE
ENSDARG00000060921	pla2g6	6.2313	3.91176	2.55871	phospholipase A2, group VI (cytosolic, calcium-independent) [Source:ZFIN;Acc:ZDB-GENE-040426-2079]	52	51	protein_coding	FALSE	FALSE
ENSDARG00000069482	traf1	6.2313	2.23904	0.579857	TNF receptor-associated factor 1 [Source:ZFIN;Acc:ZDB-GENE-071120-4]	34	36	protein_coding	FALSE	FALSE
ENSDARG00000074074	rnf26	6.2313	2.70481	1.2204	ring finger protein 26 [Source:ZFIN;Acc:ZDB-GENE-060727-1]	37	38	protein_coding	TRUE	FALSE
ENSDARG00000074331	eif4g3b	6.2313	2.00741	0.165806	eukaryotic translation initiation factor 4 gamma, 3b [Source:ZFIN;Acc:ZDB-GENE-090312-49]	51	53	protein_coding	FALSE	FALSE
ENSDARG00000090764	bcas3	6.2313	2.04308	0.235349	breast carcinoma amplified sequence 3 [Source:ZFIN;Acc:ZDB-GENE-040426-1257]	84	85	protein_coding	FALSE	FALSE
ENSDARG00000100601	si.dkey.6d5.4	6.2313	1.81984	0	si:dkey-6d5.4 [Source:ZFIN;Acc:ZDB-GENE-141216-122]	0	0	lincRNA	NA	NA
ENSDARG00000059581	mbd5	6.20091	2.39068	0.799043	methyl-CpG binding domain protein 5 [Source:ZFIN;Acc:ZDB-GENE-070209-125]	57	56	protein_coding	FALSE	FALSE
ENSDARG00000060109	aggf1	6.20091	4.63717	3.33089	angiogenic factor with G patch and FHA domains 1 [Source:ZFIN;Acc:ZDB-GENE-060929-836]	42	41	protein_coding	FALSE	FALSE
ENSDARG00000075325	mrpl16	6.20091	3.66375	2.29481	mitochondrial ribosomal protein L16 [Source:ZFIN;Acc:ZDB-GENE-041122-1]	54	56	protein_coding	FALSE	FALSE
ENSDARG00000076483	zgc.198241	6.20091	5.32156	4.10865	zgc:198241 [Source:ZFIN;Acc:ZDB-GENE-080303-14]	0	0	protein_coding	TRUE	TRUE
ENSDARG00000079785	si.dkeyp.73a2.2	6.20091	1.52307	0	si:dkeyp-73a2.2 [Source:ZFIN;Acc:ZDB-GENE-090313-390]	0	0	lincRNA	NA	NA
ENSDARG00000102803	CABZ01087091.1	6.20091	1.51166	0		0	0	protein_coding	TRUE	FALSE
ENSDARG00000105465	hnrnpa0a	6.20091	2.53529	0.995475		NA	NA	processed_transcript	NA	NA
ENSDARG00000105501	si.cabz01044765.1	6.20091	1.99251	0.141144	si:cabz01044765.1 [Source:ZFIN;Acc:ZDB-GENE-160114-21]	NA	NA	lincRNA	NA	NA
ENSDARG00000030441	ppa1b	6.17051	2.73047	1.25182	pyrophosphatase (inorganic) 1b [Source:ZFIN;Acc:ZDB-GENE-050417-375]	70	71	protein_coding	FALSE	FALSE
ENSDARG00000053101	prpf38b	6.17051	3.2231	1.81964	pre-mRNA processing factor 38B [Source:ZFIN;Acc:ZDB-GENE-040426-2878]	66	67	protein_coding	TRUE	FALSE
ENSDARG00000096895	si.ch211.87m19.3	6.17051	3.62929	2.25795	si:ch211-87m19.3 [Source:ZFIN;Acc:ZDB-GENE-131119-28]	0	0	processed_transcript	NA	NA
ENSDARG00000098466	ube2a	6.17051	2.76155	1.29222	ubiquitin-conjugating enzyme E2A (RAD6 homolog) [Source:ZFIN;Acc:ZDB-GENE-030616-72]	100	100	protein_coding	FALSE	FALSE
ENSDARG00000099972	nup153	6.17051	1.69911	0	nucleoporin 153 [Source:ZFIN;Acc:ZDB-GENE-030131-4581]	43	43	protein_coding	FALSE	FALSE
ENSDARG00000020015	mrps33	6.14011	3.81333	2.44866	mitochondrial ribosomal protein S33 [Source:ZFIN;Acc:ZDB-GENE-040715-6]	68	61	protein_coding	FALSE	FALSE
ENSDARG00000053152	pcmtd1	6.14011	3.48578	2.10462	protein-L-isoaspartate (D-aspartate) O-methyltransferase domain containing 1 [Source:ZFIN;Acc:ZDB-GENE-030131-5387]	79	79	protein_coding	FALSE	FALSE
ENSDARG00000004726	trappc11	6.10972	2.16107	0.455016	trafficking protein particle complex 11 [Source:ZFIN;Acc:ZDB-GENE-030131-1723]	77	79	protein_coding	FALSE	FALSE
ENSDARG00000086708	TRAF3IP3	6.10972	1.73208	0	TRAF3 interacting protein 3 [Source:HGNC Symbol;Acc:HGNC:30766]	18	22	protein_coding	TRUE	FALSE
ENSDARG00000089663	LSM3	6.10972	2.81447	1.35732	LSM3 homolog, U6 small nuclear RNA and mRNA degradation associated [Source:HGNC Symbol;Acc:HGNC:17874]	97	97	protein_coding	FALSE	FALSE
ENSDARG00000097694	si.dkey.193d10.9	6.10972	3.92333	2.57036	si:dkey-193d10.9 [Source:ZFIN;Acc:ZDB-GENE-131122-24]	0	0	lincRNA	NA	NA
ENSDARG00000099667	snrpg	6.10972	3.42602	2.0483	small nuclear ribonucleoprotein polypeptide G [Source:ZFIN;Acc:ZDB-GENE-040912-105]	89	89	protein_coding	FALSE	FALSE
ENSDARG00000101891	arid1ab	6.10972	2.88396	1.43855	AT rich interactive domain 1Ab (SWI-like) [Source:ZFIN;Acc:ZDB-GENE-030131-5725]	61	62	protein_coding	FALSE	FALSE
ENSDARG00000105301	sox8a	6.10972	2.70742	1.22382	SRY (sex determining region Y)-box 8a [Source:ZFIN;Acc:ZDB-GENE-130530-719]	0	0	protein_coding	FALSE	FALSE
ENSDARG00000016391	calcoco1b	6.07932	2.83966	1.39044	calcium binding and coiled-coil domain 1b [Source:ZFIN;Acc:ZDB-GENE-031118-126]	18	19	protein_coding	FALSE	FALSE
ENSDARG00000021984	ndufa2	6.07932	3.31574	1.92808	NADH dehydrogenase (ubiquinone) 1 alpha subcomplex, 2 [Source:ZFIN;Acc:ZDB-GENE-050522-377]	60	64	protein_coding	FALSE	FALSE
ENSDARG00000074488	ifngr1	6.07932	5.70155	4.54685	interferon gamma receptor 1 [Source:ZFIN;Acc:ZDB-GENE-071120-8]	0	0	protein_coding	TRUE	TRUE
ENSDARG00000077694	dtnba	6.07932	3.84507	2.483	dystrobrevin, beta a [Source:ZFIN;Acc:ZDB-GENE-030131-3967]	0	0	protein_coding	FALSE	FALSE
ENSDARG00000095912	si.dkey.229b18.3	6.07932	3.13975	1.73563	si:dkey-229b18.3 [Source:ZFIN;Acc:ZDB-GENE-030131-6870]	0	0	protein_coding	FALSE	FALSE
ENSDARG00000098272	nipbla	6.07932	1.94733	0.0486291	nipped-B homolog a (Drosophila) [Source:ZFIN;Acc:ZDB-GENE-060526-121]	70	70	protein_coding	FALSE	FALSE
ENSDARG00000018973	clptm1	6.04892	5.74791	4.59798	cleft lip and palate associated transmembrane protein 1 [Source:ZFIN;Acc:ZDB-GENE-040801-265]	77	77	protein_coding	TRUE	FALSE
ENSDARG00000091137	CABZ01079258.1	6.04892	2.78583	1.31849		0	0	protein_coding	FALSE	FALSE
ENSDARG00000056924	sap130a	6.01853	3.12232	1.71602	Sin3A-associated protein a [Source:ZFIN;Acc:ZDB-GENE-070615-5]	58	59	protein_coding	FALSE	FALSE
ENSDARG00000100188	RNPS1..1.to.many.	6.01853	3.1468	1.74257	RNA binding protein S1, serine-rich domain [Source:HGNC Symbol;Acc:HGNC:10080]	80	80	protein_coding	FALSE	FALSE
ENSDARG00000060534	sgpp1	5.98813	3.3834	2.00233	sphingosine-1-phosphate phosphatase 1 [Source:ZFIN;Acc:ZDB-GENE-090319-2]	56	58	protein_coding	TRUE	FALSE
ENSDARG00000076801	arap3	5.98813	2.52086	0.975304	ArfGAP with RhoGAP domain, ankyrin repeat and PH domain 3 [Source:ZFIN;Acc:ZDB-GENE-091019-1]	50	51	protein_coding	FALSE	FALSE
ENSDARG00000067656	kcmf1	5.95773	2.61648	1.10692	potassium channel modulatory factor 1 [Source:ZFIN;Acc:ZDB-GENE-040426-1383]	88	87	protein_coding	FALSE	FALSE
ENSDARG00000094085	si.dkeyp.79c2.1	5.95773	2.58638	1.0688	si:dkeyp-79c2.1 [Source:ZFIN;Acc:ZDB-GENE-091112-8]	0	0	processed_transcript	NA	NA
ENSDARG00000010098	pank1b	5.92734	2.38813	0.79546	pantothenate kinase 1b [Source:ZFIN;Acc:ZDB-GENE-070209-259]	76	77	protein_coding	FALSE	FALSE
ENSDARG00000079281	TESK1..1.to.many.	5.92734	3.79246	2.42866	si:dkeyp-75h12.2 [Source:ZFIN;Acc:ZDB-GENE-030131-7512]	41	40	protein_coding	FALSE	FALSE
ENSDARG00000100539	btr22	5.92734	3.26387	1.8662	bloodthirsty-related gene family, member 22 [Source:ZFIN;Acc:ZDB-GENE-080402-4]	17	28	protein_coding	FALSE	FALSE
ENSDARG00000027016	gbf1	5.89694	2.30831	0.684158	golgi brefeldin A resistant guanine nucleotide exchange factor 1 [Source:ZFIN;Acc:ZDB-GENE-081107-54]	75	75	protein_coding	FALSE	FALSE
ENSDARG00000092337	gas5	5.89694	3.05021	1.63739	growth arrest-specific 5 [Source:ZFIN;Acc:ZDB-GENE-081104-166]	0	0	processed_transcript	NA	NA
ENSDARG00000100664	wdr1	5.89694	3.05183	1.63934	WD repeat domain 1 [Source:ZFIN;Acc:ZDB-GENE-040426-804]	84	83	protein_coding	FALSE	FALSE
ENSDARG00000023484	fam101a	5.86654	5.89929	4.75478	family with sequence similarity 101, member A [Source:ZFIN;Acc:ZDB-GENE-030616-80]	48	32	protein_coding	FALSE	FALSE
ENSDARG00000070515	si.dkeyp.52c3.5	5.86654	2.24607	0.589805	si:dkeyp-52c3.5 [Source:ZFIN;Acc:ZDB-GENE-110411-268]	0	0	protein_coding	FALSE	FALSE
ENSDARG00000015824	lemd3	5.83615	3.42557	2.0483	LEM domain containing 3 [Source:ZFIN;Acc:ZDB-GENE-030131-490]	49	51	protein_coding	TRUE	FALSE
ENSDARG00000043586	fas	5.80575	3.61286	2.24049	Fas cell surface death receptor [Source:ZFIN;Acc:ZDB-GENE-061019-2]	24	25	protein_coding	TRUE	TRUE
ENSDARG00000092842	si.ch211.93g21.2	5.80575	3.85983	2.49933	si:ch211-93g21.2 [Source:ZFIN;Acc:ZDB-GENE-060503-799]	0	0	protein_coding	FALSE	FALSE
ENSDARG00000099368	slc25a42	5.80575	2.1747	0.477519	solute carrier family 25, member 42 [Source:ZFIN;Acc:ZDB-GENE-060825-313]	74	72	protein_coding	FALSE	FALSE
ENSDARG00000104518	si.dkeyp.13d12.23	5.80575	3.51667	2.13193	si:dkeyp-13d12.23 [Source:ZFIN;Acc:ZDB-GENE-141212-2]	0	0	IG_C_gene	TRUE	FALSE
ENSDARG00000015222	cbll1	5.74496	3.45011	2.06787	Cbl proto-oncogene-like 1, E3 ubiquitin protein ligase [Source:ZFIN;Acc:ZDB-GENE-040426-691]	69	67	protein_coding	FALSE	FALSE
ENSDARG00000078966	rbm15b	5.74496	1.65066	0	RNA binding motif protein 15B [Source:ZFIN;Acc:ZDB-GENE-080204-91]	56	56	protein_coding	FALSE	FALSE
ENSDARG00000104787	si.dkey.28k24.2.2	5.74496	2.10875	0.360788	si:dkey-28k24.2 [Source:ZFIN;Acc:ZDB-GENE-121213-4]	0	0	protein_coding	FALSE	FALSE
ENSDARG00000020621	ap1b1	5.71456	3.8078	2.44411	adaptor-related protein complex 1, beta 1 subunit [Source:ZFIN;Acc:ZDB-GENE-061025-1]	87	87	protein_coding	FALSE	FALSE
ENSDARG00000088820	znf1134.1	5.71456	2.37876	0.785195		39	40	protein_coding	FALSE	FALSE
ENSDARG00000100873	NDUFAF3	5.71456	2.50549	0.955167	NADH:ubiquinone oxidoreductase complex assembly factor 3 [Source:HGNC Symbol;Acc:HGNC:29918]	60	61	protein_coding	FALSE	FALSE
ENSDARG00000016212	nup214	5.68416	2.10393	0.351806	nucleoporin 214 [Source:ZFIN;Acc:ZDB-GENE-110203-3]	42	44	protein_coding	FALSE	FALSE
ENSDARG00000071648	zgc.113298	5.68416	3.40125	2.02467	zgc:113298 [Source:ZFIN;Acc:ZDB-GENE-050522-40]	0	0	protein_coding	TRUE	TRUE
ENSDARG00000103688	tank	5.68416	2.0676	0.285652	TRAF family member-associated NFKB activator [Source:ZFIN;Acc:ZDB-GENE-060929-308]	0	0	protein_coding	FALSE	FALSE
ENSDARG00000079325	CABZ01046432.1	5.65377	1.76551	0		0	0	protein_coding	TRUE	TRUE
ENSDARG00000094202	si.dkeyp.72g6.2	5.65377	3.43638	2.06066	si:dkeyp-72g6.2 [Source:ZFIN;Acc:ZDB-GENE-090312-41]	0	0	protein_coding	FALSE	FALSE
ENSDARG00000100565	si.dkey.29n10.1	5.65377	3.0714	1.65944	si:dkey-29n10.1 [Source:ZFIN;Acc:ZDB-GENE-131122-10]	0	0	transcribed_unprocessed_pseudogene	NA	NA
ENSDARG00000099711	si.dkey.92c21.1	5.62337	1.68801	0	si:dkey-92c21.1 [Source:ZFIN;Acc:ZDB-GENE-110913-16]	0	0	protein_coding	FALSE	FALSE
ENSDARG00000003570	hsp90b1	5.59297	3.53695	2.15876	heat shock protein 90, beta (grp94), member 1 [Source:ZFIN;Acc:ZDB-GENE-031002-1]	84	84	protein_coding	FALSE	TRUE
ENSDARG00000013443	atp6v1ba	5.59297	3.15098	1.74636	ATPase, H+ transporting, lysosomal, V1 subunit B, member a [Source:ZFIN;Acc:ZDB-GENE-030711-3]	0	0	protein_coding	FALSE	FALSE
ENSDARG00000037421	egr1	5.56258	1.57098	0	early growth response 1 [Source:ZFIN;Acc:ZDB-GENE-980526-320]	64	64	protein_coding	FALSE	FALSE
ENSDARG00000017255	tmed1b	5.53218	2.41977	0.838503	transmembrane p24 trafficking protein 1b [Source:ZFIN;Acc:ZDB-GENE-070112-1112]	57	57	protein_coding	TRUE	TRUE
ENSDARG00000036700	si.ch211.114n24.6	5.53218	1.72138	0	si:ch211-114n24.6 [Source:ZFIN;Acc:ZDB-GENE-120214-26]	0	0	protein_coding	FALSE	FALSE
ENSDARG00000015394	thoc7	5.50178	3.25726	1.85896	THO complex 7 [Source:ZFIN;Acc:ZDB-GENE-040801-17]	77	77	protein_coding	FALSE	FALSE
ENSDARG00000098660	TSTD2	5.50178	3.06403	1.6523	thiosulfate sulfurtransferase (rhodanese)-like domain containing 2 [Source:HGNC Symbol;Acc:HGNC:30087]	52	52	protein_coding	FALSE	FALSE
ENSDARG00000060838	trim35.33	5.47139	2.5895	1.07104	tripartite motif containing 35-33 [Source:ZFIN;Acc:ZDB-GENE-081031-1]	31	33	protein_coding	FALSE	FALSE
ENSDARG00000087206	CCT2..1.to.many..1	5.44099	3.09934	1.69064	chaperonin containing TCP1, subunit 2 (beta) [Source:HGNC Symbol;Acc:HGNC:1615]	82	81	protein_coding	FALSE	FALSE
ENSDARG00000095707	si.dkey.183n20.2	5.44099	3.16122	1.75615	si:dkey-183n20.2 [Source:ZFIN;Acc:ZDB-GENE-041001-153]	0	0	lincRNA	NA	NA
ENSDARG00000038392	si.dkeyp.52c3.5.1	5.41059	3.78685	2.42465	si:dkeyp-52c3.5 [Source:ZFIN;Acc:ZDB-GENE-110411-268]	0	0	protein_coding	FALSE	FALSE
ENSDARG00000093819	si.ch211.207l22.1	5.41059	2.41291	0.82895	si:ch211-207l22.1 [Source:ZFIN;Acc:ZDB-GENE-100922-77]	0	0	processed_transcript	NA	NA
ENSDARG00000101631	ETFA	5.41059	3.83067	2.46803	electron-transfer-flavoprotein, alpha polypeptide [Source:HGNC Symbol;Acc:HGNC:3481]	57	56	protein_coding	FALSE	FALSE
ENSDARG00000073901	CABZ01046997.1	5.3498	2.60793	1.09602		0	0	protein_coding	FALSE	FALSE
ENSDARG00000105179	HDAC7..1.to.many.	5.3498	3.95563	2.6066	histone deacetylase 7 [Source:HGNC Symbol;Acc:HGNC:14067]	45	46	protein_coding	FALSE	FALSE
ENSDARG00000101845	si.ch73.234i15.2	5.3194	2.26368	0.61527	si:ch73-234i15.2 [Source:ZFIN;Acc:ZDB-GENE-141216-457]	0	0	lincRNA	NA	NA
ENSDARG00000102992	btr20	5.28901	2.57534	1.05149	bloodthirsty-related gene family, member 20 [Source:ZFIN;Acc:ZDB-GENE-060421-3419]	17	27	protein_coding	FALSE	FALSE
ENSDARG00000101728	si.dkeyp.80d11.12	5.25861	1.91392	0	si:dkeyp-80d11.12 [Source:ZFIN;Acc:ZDB-GENE-070424-273]	0	0	protein_coding	FALSE	FALSE
ENSDARG00000104578	CABZ01081359.1	5.22822	1.90688	0		0	0	protein_coding	FALSE	FALSE
ENSDARG00000094608	si.dkey.222h21.10	5.19782	2.19479	0.508837	si:dkey-222h21.10 [Source:ZFIN;Acc:ZDB-GENE-081031-22]	0	0	protein_coding	FALSE	FALSE
ENSDARG00000094782	si.ch211.196h16.4	5.19782	2.43978	0.867832	si:ch211-196h16.4 [Source:ZFIN;Acc:ZDB-GENE-081029-1]	0	0	protein_coding	FALSE	FALSE
ENSDARG00000001014	myh9b	5.07623	2.26177	0.612351	myosin, heavy chain 9b, non-muscle [Source:ZFIN;Acc:ZDB-GENE-030131-998]	80	81	protein_coding	FALSE	FALSE
ENSDARG00000071573	lsm5	5.07623	2.0836	0.3147	LSM5 homolog, U6 small nuclear RNA and mRNA degradation associated [Source:ZFIN;Acc:ZDB-GENE-070822-23]	95	95	protein_coding	FALSE	FALSE
ENSDARG00000091967	ttf1	5.07623	3.16698	1.7624	transcription termination factor, RNA polymerase I [Source:ZFIN;Acc:ZDB-GENE-030131-6913]	26	25	protein_coding	FALSE	FALSE
ENSDARG00000098032	si.dkey.7i4.13	5.01544	1.54711	0	si:dkey-7i4.13 [Source:ZFIN;Acc:ZDB-GENE-131127-112]	0	0	protein_coding	FALSE	FALSE
ENSDARG00000093136	si.ch211.213j22.1	4.98504	3.53615	2.15849	si:ch211-213j22.1 [Source:ZFIN;Acc:ZDB-GENE-081104-174]	0	0	processed_transcript	NA	NA
ENSDARG00000098716	PARP11	4.98504	2.32548	0.710725	poly(ADP-ribose) polymerase family member 11 [Source:HGNC Symbol;Acc:HGNC:1186]	39	39	protein_coding	FALSE	FALSE
ENSDARG00000063101	man2a2	4.89385	1.97056	0.0996624	mannosidase, alpha, class 2A, member 2 [Source:ZFIN;Acc:ZDB-GENE-110331-1]	68	68	protein_coding	TRUE	FALSE
ENSDARG00000102941	si.ch211.249c2.1	4.83306	3.70164	2.33805	si:ch211-249c2.1 [Source:ZFIN;Acc:ZDB-GENE-060503-317]	0	0	protein_coding	FALSE	FALSE
ENSDARG00000098103	tefb	4.80266	2.57833	1.05589	thyrotrophic embryonic factor b [Source:ZFIN;Acc:ZDB-GENE-050522-224]	51	51	protein_coding	FALSE	FALSE
ENSDARG00000099309	si.zfos.169g10.3	4.80266	2.61294	1.10165	si:zfos-169g10.3 [Source:ZFIN;Acc:ZDB-GENE-120215-190]	0	0	protein_coding	FALSE	FALSE
ENSDARG00000058696	tbl1xr1a	4.77227	1.50161	0	transducin (beta)-like 1 X-linked receptor 1a [Source:ZFIN;Acc:ZDB-GENE-050522-314]	0	0	protein_coding	FALSE	FALSE
ENSDARG00000092077	si.dkey.147f3.4.4	4.77227	3.76183	2.40186	si:dkey-147f3.4 [Source:ZFIN;Acc:ZDB-GENE-061009-29]	35	32	protein_coding	FALSE	FALSE
ENSDARG00000101059	dhx36	4.77227	5.15589	3.91691	DEAH (Asp-Glu-Ala-His) box polypeptide 36 [Source:ZFIN;Acc:ZDB-GENE-050419-20]	64	64	protein_coding	FALSE	FALSE
ENSDARG00000101389	zgc.174180	4.77227	1.64242	0	zgc:174180 [Source:ZFIN;Acc:ZDB-GENE-080206-1]	0	0	protein_coding	FALSE	FALSE
ENSDARG00000102098	si.dkey.197m7.1	4.77227	1.59417	0	si:dkey-197m7.1 [Source:ZFIN;Acc:ZDB-GENE-131118-19]	0	0	lincRNA	NA	NA
ENSDARG00000088561	CR450729.1	4.71147	2.38477	0.792348		0	0	protein_coding	FALSE	FALSE
ENSDARG00000088805	NES	4.71147	2.24952	0.594298	Nestin [Source:UniProtKB/Swiss-Prot;Acc:P86839]	16	17	protein_coding	FALSE	FALSE
ENSDARG00000101189	CR589947.2	4.68108	3.10245	1.69424		0	0	protein_coding	FALSE	FALSE
ENSDARG00000001857	aff4	4.52909	1.93218	0.0222486	AF4/FMR2 family, member 4 [Source:ZFIN;Acc:ZDB-GENE-100910-5]	58	58	protein_coding	FALSE	FALSE
ENSDARG00000087592	si.dkey.14o1.14	4.4379	4.00249	2.65535	si:dkey-14o1.14 [Source:ZFIN;Acc:ZDB-GENE-081105-164]	0	0	processed_transcript	NA	NA
ENSDARG00000105426	si.ch1073.526c11.4	4.4379	3.06156	1.65016	si:ch1073-526c11.4 [Source:ZFIN;Acc:ZDB-GENE-160113-154]	NA	NA	sense_intronic	NA	NA
ENSDARG00000076106	ftr43	4.37711	2.4513	0.880429	finTRIM family, member 43 [Source:ZFIN;Acc:ZDB-GENE-090507-8]	0	0	protein_coding	FALSE	FALSE
ENSDARG00000079269	CR589947.1	4.31632	3.00554	1.58137		0	0	protein_coding	FALSE	FALSE
ENSDARG00000096819	si.dkey.48o4.1	4.16433	2.21228	0.539774	si:dkey-48o4.1 [Source:ZFIN;Acc:ZDB-GENE-131125-25]	0	0	lincRNA	NA	NA
ENSDARG00000043426	CABZ01058867.1	4.01235	1.69802	0		26	25	protein_coding	TRUE	TRUE
ENSDARG00000098584	ndufa13	3.92116	2.77729	1.31044	NADH dehydrogenase (ubiquinone) 1 alpha subcomplex, 13 [Source:ZFIN;Acc:ZDB-GENE-040426-1672]	76	72	protein_coding	TRUE	FALSE
ENSDARG00000104731	CR759907.2	3.92116	1.75358	0		41	43	protein_coding	FALSE	FALSE
ENSDARG00000095013	si.dkey.240n22.3	3.89076	3.2085	1.80369	si:dkey-240n22.3 [Source:ZFIN;Acc:ZDB-GENE-070705-409]	0	0	protein_coding	FALSE	FALSE
ENSDARG00000099160	si.dkey.10g2.5	3.79957	2.09906	0.342939	si:dkey-10g2.5 [Source:ZFIN;Acc:ZDB-GENE-060531-69]	0	0	processed_transcript	NA	NA
ENSDARG00000100865	si.dkey.269o24.1	3.79957	1.80961	0	si:dkey-269o24.1 [Source:ZFIN;Acc:ZDB-GENE-041210-347]	0	0	protein_coding	FALSE	FALSE
ENSDARG00000093486	si.dkey.3d4.1	3.76918	2.66969	1.17801	si:dkey-3d4.1 [Source:ZFIN;Acc:ZDB-GENE-070912-526]	0	0	processed_transcript	NA	NA
ENSDARG00000105181	si.dkey.1c7.1	3.5868	2.49423	0.939876	si:dkey-1c7.1 [Source:ZFIN;Acc:ZDB-GENE-121214-246]	0	0	protein_coding	TRUE	TRUE
ENSDARG00000079657	si.dkey.53k12.18	3.52601	2.06314	0.277803	si:dkey-53k12.18 [Source:ZFIN;Acc:ZDB-GENE-141212-3]	0	0	protein_coding	TRUE	FALSE
ENSDARG00000077602	si.ch211.212i14.3	3.43482	2.86212	1.41176	si:ch211-212i14.3 [Source:ZFIN;Acc:ZDB-GENE-100921-80]	0	0	processed_transcript	NA	NA
ENSDARG00000100909	zgc.173581	3.43482	1.58793	0	zgc:173581 [Source:ZFIN;Acc:ZDB-GENE-080212-7]	18	29	protein_coding	FALSE	FALSE
ENSDARG00000074334	si.dkey.1c7.1.1	3.40442	1.73435	0	si:dkey-1c7.1 [Source:ZFIN;Acc:ZDB-GENE-121214-246]	0	0	protein_coding	TRUE	TRUE
ENSDARG00000092204	ms4a17a.5	3.40442	3.40287	2.02512	membrane-spanning 4-domains, subfamily A, member 17A.5 [Source:ZFIN;Acc:ZDB-GENE-040912-55]	22	20	protein_coding	TRUE	FALSE
ENSDARG00000101571	si.ch211.106j21.4	3.31323	2.63717	1.1362	si:ch211-106j21.4 [Source:ZFIN;Acc:ZDB-GENE-081103-9]	0	0	protein_coding	FALSE	FALSE
ENSDARG00000102028	si.dkey.51d8.3.2	3.31323	2.7668	1.29711	si:dkey-51d8.3 [Source:ZFIN;Acc:ZDB-GENE-081103-8]	0	0	protein_coding	FALSE	FALSE
ENSDARG00000102927	si.dkey.261o4.6	3.31323	4.27418	2.93219	si:dkey-261o4.6 [Source:ZFIN;Acc:ZDB-GENE-131118-3]	0	0	protein_coding	FALSE	FALSE
ENSDARG00000103241	CABZ01002280.1	3.28283	3.08852	1.67812		0	0	protein_coding	TRUE	TRUE
ENSDARG00000098357	si.ch211.229l10.4	3.16125	2.25229	0.597739	si:ch211-229l10.4 [Source:ZFIN;Acc:ZDB-GENE-060503-595]	8	8	protein_coding	FALSE	FALSE
ENSDARG00000105310	si.cabz01039271.2	3.16125	2.13048	0.397234	si:cabz01039271.2 [Source:ZFIN;Acc:ZDB-GENE-160114-54]	NA	NA	protein_coding	NA	NA
ENSDARG00000105427	si.dkey.187j14.8	3.07006	1.94509	0.0458401	si:dkey-187j14.8 [Source:ZFIN;Acc:ZDB-GENE-160113-2]	NA	NA	protein_coding	NA	NA
ENSDARG00000087407	si.ch73.304f21.1	2.91807	2.65783	1.16339	si:ch73-304f21.1 [Source:ZFIN;Acc:ZDB-GENE-131121-162]	0	0	protein_coding	TRUE	TRUE
ENSDARG00000093688	si.ch73.234b20.4	2.79649	2.53151	0.990703	si:ch73-234b20.4 [Source:ZFIN;Acc:ZDB-GENE-090313-145]	0	0	lincRNA	NA	NA
ENSDARG00000096038	si.dkeyp.85d8.1	2.79649	3.15994	1.75556	si:dkeyp-85d8.1 [Source:ZFIN;Acc:ZDB-GENE-110914-90]	27	27	protein_coding	FALSE	FALSE
ENSDARG00000100341	si.ch211.196h24.2	2.79649	2.07125	0.292098	si:ch211-196h24.2 [Source:ZFIN;Acc:ZDB-GENE-081103-20]	0	0	protein_coding	FALSE	FALSE
ENSDARG00000059693	adam19a	2.76609	3.75656	2.39525	ADAM metallopeptidase domain 19a [Source:ZFIN;Acc:ZDB-GENE-070813-1]	39	40	protein_coding	TRUE	FALSE
ENSDARG00000098383	RNH1..1.to.many..30	2.76609	3.44861	2.06695	si:dkey-14o6.1 [Source:ZFIN;Acc:ZDB-GENE-081103-51]	0	0	protein_coding	FALSE	FALSE
ENSDARG00000098485	CU929365.1	2.76609	2.50138	0.951745		0	0	protein_coding	FALSE	FALSE
ENSDARG00000103229	si.dkey.265e15.5	2.76609	3.12418	1.71714	si:dkey-265e15.5 [Source:ZFIN;Acc:ZDB-GENE-081104-6]	0	0	protein_coding	FALSE	FALSE
ENSDARG00000100803	zgc.113443	2.73569	2.15505	0.445487	zgc:113443 [Source:ZFIN;Acc:ZDB-GENE-050913-134]	0	0	protein_coding	FALSE	FALSE
ENSDARG00000101980	bmper	2.73569	1.78807	0	BMP binding endothelial regulator [Source:ZFIN;Acc:ZDB-GENE-030219-146]	67	66	protein_coding	FALSE	TRUE
ENSDARG00000104105	ttf2	2.7053	2.27783	0.637141	transcription termination factor, RNA polymerase II [Source:ZFIN;Acc:ZDB-GENE-110411-73]	48	50	protein_coding	FALSE	FALSE
ENSDARG00000092191	si.dkey.238c7.13	2.55331	4.83579	3.54391	si:dkey-238c7.13 [Source:ZFIN;Acc:ZDB-GENE-030131-7311]	0	0	processed_transcript	NA	NA
ENSDARG00000091026	si.ch211.218h8.1	2.52292	2.32018	0.702377	si:ch211-218h8.1 [Source:ZFIN;Acc:ZDB-GENE-081103-16]	0	0	protein_coding	FALSE	FALSE
ENSDARG00000095933	si.ch73.167f18.3.1	2.40133	1.6826	0	si:ch73-167f18.3 [Source:ZFIN;Acc:ZDB-GENE-110411-36]	0	0	lincRNA	NA	NA
ENSDARG00000062745	socs5b	2.27974	2.29946	0.669903	suppressor of cytokine signaling 5b [Source:ZFIN;Acc:ZDB-GENE-080722-18]	66	65	protein_coding	FALSE	FALSE
ENSDARG00000091013	si.dkey.84h14.2	2.27974	1.84046	0	si:dkey-84h14.2 [Source:ZFIN;Acc:ZDB-GENE-110913-33]	0	0	protein_coding	FALSE	FALSE
ENSDARG00000100904	zgc.65811	1.97578	4.3693	3.02882	zgc:65811 [Source:ZFIN;Acc:ZDB-GENE-040426-1428]	0	0	protein_coding	TRUE	FALSE
ENSDARG00000098081	FO704905.1	1.91499	2.26771	0.622076		76	76	protein_coding	TRUE	TRUE
ENSDARG00000098306	si.dkey.82i20.1	1.91499	2.44238	0.871145	si:dkey-82i20.1 [Source:ZFIN;Acc:ZDB-GENE-081104-500]	0	0	protein_coding	FALSE	FALSE
ENSDARG00000099058	CU929262.1	1.91499	1.56497	0		0	0	protein_coding	TRUE	FALSE
ENSDARG00000055052	map2	1.88459	1.89887	0	microtubule-associated protein 2 [Source:ZFIN;Acc:ZDB-GENE-041010-118]	39	55	protein_coding	FALSE	FALSE
ENSDARG00000104775	si.ch211.134a4.1	1.8238	3.41568	2.03671	si:ch211-134a4.1 [Source:ZFIN;Acc:ZDB-GENE-131121-523]	0	0	protein_coding	FALSE	TRUE
ENSDARG00000092003	ccs	1.7934	1.66185	0	copper chaperone for superoxide dismutase [Source:ZFIN;Acc:ZDB-GENE-050417-322]	69	68	protein_coding	FALSE	FALSE
ENSDARG00000102049	si.ch73.361k9.1	1.7934	1.53973	0	si:ch73-361k9.1 [Source:ZFIN;Acc:ZDB-GENE-141222-14]	0	0	processed_transcript	NA	NA
ENSDARG00000103841	CU024870.1	1.763	1.84756	0		0	0	protein_coding	FALSE	FALSE
ENSDARG00000105091	zgc.174944	1.67181	1.67636	0	zgc:174944 [Source:ZFIN;Acc:ZDB-GENE-080207-2]	0	0	protein_coding	FALSE	FALSE
ENSDARG00000069895	CR392036.1	1.64142	2.16754	0.466712		0	0	protein_coding	FALSE	FALSE
ENSDARG00000086075	ttc3	1.64142	2.73127	1.25203	tetratricopeptide repeat domain 3 [Source:ZFIN;Acc:ZDB-GENE-090313-3]	29	29	protein_coding	FALSE	FALSE
ENSDARG00000069755	mtmr11	1.61102	2.47467	0.915447	myotubularin related protein 11 [Source:ZFIN;Acc:ZDB-GENE-130530-726]	33	34	protein_coding	FALSE	FALSE
ENSDARG00000092457	si.ch211.207c6.6	1.61102	2.2219	0.5538	si:ch211-207c6.6 [Source:ZFIN;Acc:ZDB-GENE-060526-93]	0	0	processed_transcript	NA	NA
ENSDARG00000095778	si.rp71.1k13.5	1.61102	1.65963	0	si:rp71-1k13.5 [Source:ZFIN;Acc:ZDB-GENE-090312-155]	0	0	processed_transcript	NA	NA
ENSDARG00000086512	FP102464.1	1.58062	1.93933	0.0330982		68	69	protein_coding	FALSE	FALSE
ENSDARG00000099195	ier2	1.58062	2.72481	1.24548	immediate early response 2 [Source:ZFIN;Acc:ZDB-GENE-030131-9126]	34	35	protein_coding	FALSE	FALSE
ENSDARG00000005586	zbtb20	1.48943	2.23021	0.567199	zinc finger and BTB domain containing 20 [Source:ZFIN;Acc:ZDB-GENE-070112-1992]	66	66	protein_coding	FALSE	FALSE
ENSDARG00000024431	ERG	1.45904	2.87878	1.43424	v-ets avian erythroblastosis virus E26 oncogene homolog [Source:HGNC Symbol;Acc:HGNC:3446]	69	70	protein_coding	FALSE	FALSE
ENSDARG00000086450	tdg.2	1.42864	1.50821	0	thymine DNA glycosylase, tandem duplicate 2 [Source:ZFIN;Acc:ZDB-GENE-131121-30]	51	51	protein_coding	FALSE	FALSE
ENSDARG00000075735	cxxc5b	1.36785	1.67513	0	CXXC finger protein 5b [Source:ZFIN;Acc:ZDB-GENE-130225-1]	46	47	protein_coding	FALSE	FALSE
ENSDARG00000038442	plcg1	1.33745	2.16937	0.469656	phospholipase C, gamma 1 [Source:ZFIN;Acc:ZDB-GENE-030421-3]	72	73	protein_coding	FALSE	FALSE
ENSDARG00000077760	ascc1	1.33745	2.13302	0.402565	activating signal cointegrator 1 complex subunit 1 [Source:ZFIN;Acc:ZDB-GENE-050417-80]	58	53	protein_coding	FALSE	FALSE
ENSDARG00000099048	znf1070	1.33745	1.60066	0	zinc finger protein 1070 [Source:ZFIN;Acc:ZDB-GENE-080212-4]	0	0	protein_coding	FALSE	FALSE
ENSDARG00000074316	itga1	1.30705	2.63579	1.13429	integrin, alpha 1 [Source:ZFIN;Acc:ZDB-GENE-091118-115]	51	52	protein_coding	TRUE	TRUE
ENSDARG00000099371	cygb1	1.30705	1.76266	0	cytoglobin 1 [Source:ZFIN;Acc:ZDB-GENE-020513-1]	48	47	protein_coding	FALSE	FALSE
ENSDARG00000074796	dbf4	1.24626	2.30565	0.680369	DBF4 zinc finger [Source:ZFIN;Acc:ZDB-GENE-091020-13]	27	27	protein_coding	FALSE	FALSE
ENSDARG00000033466	tagln2	1.15507	2.32705	0.711547	transgelin 2 [Source:ZFIN;Acc:ZDB-GENE-020802-2]	64	64	protein_coding	FALSE	FALSE
ENSDARG00000037350	rpl9	1.15507	2.48129	0.924974	ribosomal protein L9 [Source:ZFIN;Acc:ZDB-GENE-030131-8646]	74	89	protein_coding	FALSE	FALSE
ENSDARG00000042642	wtap	1.15507	1.67546	0	Wilms tumor 1 associated protein [Source:ZFIN;Acc:ZDB-GENE-030131-5990]	70	71	protein_coding	FALSE	FALSE
ENSDARG00000089892	cd44b	1.15507	2.56122	1.03269	CD44 molecule (Indian blood group) b [Source:ZFIN;Acc:ZDB-GENE-110429-2]	23	22	protein_coding	TRUE	FALSE
ENSDARG00000015752	zap70	1.12467	2.71006	1.22728	zeta-chain (TCR) associated protein kinase [Source:ZFIN;Acc:ZDB-GENE-050522-257]	66	66	protein_coding	FALSE	FALSE
ENSDARG00000088017	PRAM1	1.12467	2.54592	1.01303	si:ch73-40i7.2 [Source:ZFIN;Acc:ZDB-GENE-130530-921]	17	20	protein_coding	FALSE	FALSE
ENSDARG00000098726	rptor	1.12467	1.5297	0	regulatory associated protein of MTOR, complex 1 [Source:ZFIN;Acc:ZDB-GENE-130530-685]	86	86	protein_coding	FALSE	FALSE
ENSDARG00000009087	cd74a	1.09428	2.17777	0.481736	CD74 molecule, major histocompatibility complex, class II invariant chain a [Source:ZFIN;Acc:ZDB-GENE-000901-1]	31	29	protein_coding	TRUE	FALSE
ENSDARG00000010619	themis	1.09428	1.95173	0.0588368	thymocyte selection associated [Source:ZFIN;Acc:ZDB-GENE-041008-160]	36	35	protein_coding	FALSE	FALSE
ENSDARG00000094984	si.ch211.197g15.8	1.06388	1.8473	0	si:ch211-197g15.8 [Source:ZFIN;Acc:ZDB-GENE-050208-377]	0	0	protein_coding	FALSE	FALSE
ENSDARG00000078970	il7r	1.03348	2.2024	0.521549	interleukin 7 receptor [Source:ZFIN;Acc:ZDB-GENE-080110-7]	26	26	protein_coding	TRUE	TRUE
ENSDARG00000090380	gzmk	1.03348	3.21299	1.80843	granzyme K [Source:ZFIN;Acc:ZDB-GENE-091204-352]	37	36	protein_coding	TRUE	TRUE
ENSDARG00000104370	esm1	1.03348	2.14363	0.425908	endothelial cell-specific molecule 1 [Source:ZFIN;Acc:ZDB-GENE-060929-748]	53	47	protein_coding	FALSE	TRUE
ENSDARG00000058366	si.dkey.222f8.3	1.00309	1.7618	0	si:dkey-222f8.3 [Source:ZFIN;Acc:ZDB-GENE-030131-3658]	0	0	protein_coding	FALSE	FALSE
ENSDARG00000088801	fgd5a	1.00309	1.54682	0	FYVE, RhoGEF and PH domain containing 5a [Source:ZFIN;Acc:ZDB-GENE-090428-3]	38	41	protein_coding	FALSE	FALSE
ENSDARG00000103919	si.ch73.1a9.3	1.00309	1.53303	0	si:ch73-1a9.3 [Source:ZFIN;Acc:ZDB-GENE-141216-84]	0	0	protein_coding	FALSE	FALSE
ENSDARG00000104635	si.busm1.194e12.12	1.00309	1.78831	0	si:busm1-194e12.12 [Source:ZFIN;Acc:ZDB-GENE-030616-319]	23	21	protein_coding	TRUE	TRUE
ENSDARG00000079105	mhc2dab	0.942295	2.40522	0.817211	major histocompatibility complex class II DAB gene [Source:ZFIN;Acc:ZDB-GENE-980526-200]	24	24	protein_coding	TRUE	TRUE
ENSDARG00000018971	b3gnt5a	0.911898	2.18537	0.494346	UDP-GlcNAc:betaGal beta-1,3-N-acetylglucosaminyltransferase 5a [Source:ZFIN;Acc:ZDB-GENE-030131-8470]	55	56	protein_coding	FALSE	TRUE
ENSDARG00000020893	slc25a22	0.911898	2.01548	0.181342	solute carrier family 25 (mitochondrial carrier: glutamate), member 22 [Source:ZFIN;Acc:ZDB-GENE-040426-2745]	0	0	protein_coding	TRUE	FALSE
ENSDARG00000046106	rab10	0.911898	1.57968	0	RAB10, member RAS oncogene family [Source:ZFIN;Acc:ZDB-GENE-040718-304]	96	96	protein_coding	FALSE	FALSE
ENSDARG00000039142	arpc5a	0.881501	1.6366	0	actin related protein 2/3 complex, subunit 5A [Source:ZFIN;Acc:ZDB-GENE-030131-8448]	81	81	protein_coding	FALSE	FALSE
ENSDARG00000062621	SATB1	0.881501	1.74587	0	SATB homeobox 1 [Source:HGNC Symbol;Acc:HGNC:10541]	68	68	protein_coding	FALSE	FALSE
ENSDARG00000089838	si.dkey.262k9.4	0.881501	2.17132	0.472268	si:dkey-262k9.4 [Source:ZFIN;Acc:ZDB-GENE-131121-545]	0	0	protein_coding	TRUE	TRUE
ENSDARG00000012820	nop56	0.851105	1.53026	0	NOP56 ribonucleoprotein homolog [Source:ZFIN;Acc:ZDB-GENE-040109-1]	71	71	protein_coding	FALSE	FALSE
ENSDARG00000056346	acap1	0.851105	1.68353	0	ArfGAP with coiled-coil, ankyrin repeat and PH domains 1 [Source:ZFIN;Acc:ZDB-GENE-070112-1242]	56	57	protein_coding	FALSE	FALSE
ENSDARG00000103924	zgc.154055	0.851105	1.65273	0	zgc:154055 [Source:ZFIN;Acc:ZDB-GENE-060929-612]	0	0	protein_coding	FALSE	FALSE
ENSDARG00000014329	npm1a	0.790312	1.79533	0	nucleophosmin 1a (nucleolar phosphoprotein B23, numatrin) [Source:ZFIN;Acc:ZDB-GENE-021028-1]	47	48	protein_coding	FALSE	FALSE
ENSDARG00000008502	pno1	0.759915	1.62204	0	partner of NOB1 homolog [Source:ZFIN;Acc:ZDB-GENE-040426-1419]	67	66	protein_coding	FALSE	FALSE
ENSDARG00000038583	abraa	0.759915	1.65246	0	actin binding Rho activating protein a [Source:ZFIN;Acc:ZDB-GENE-120730-1]	0	0	protein_coding	FALSE	FALSE
ENSDARG00000076815	eif3s10	0.759915	1.67791	0	eukaryotic translation initiation factor 3, subunit 10 (theta) [Source:ZFIN;Acc:ZDB-GENE-030131-5726]	79	79	protein_coding	FALSE	FALSE
ENSDARG00000103297	FO704607.1	0.759915	1.53318	0		0	0	protein_coding	TRUE	FALSE
ENSDARG00000104674	CCT2..1.to.many.	0.759915	1.56567	0	chaperonin containing TCP1, subunit 2 (beta) [Source:HGNC Symbol;Acc:HGNC:1615]	0	0	protein_coding	FALSE	FALSE
ENSDARG00000015922	zgc.153952	0.729518	1.89885	0	zgc:153952 [Source:ZFIN;Acc:ZDB-GENE-061103-427]	0	0	protein_coding	FALSE	FALSE
ENSDARG00000021257	eif3d	0.729518	2.16481	0.461709	eukaryotic translation initiation factor 3, subunit D [Source:ZFIN;Acc:ZDB-GENE-030131-8442]	90	90	protein_coding	FALSE	FALSE
ENSDARG00000063677	ccny	0.729518	1.67954	0	cyclin Y [Source:ZFIN;Acc:ZDB-GENE-091117-45]	87	89	protein_coding	FALSE	FALSE
ENSDARG00000005513	naca	0.699122	3.00222	1.57926	nascent polypeptide-associated complex alpha subunit [Source:ZFIN;Acc:ZDB-GENE-020423-4]	28	18	protein_coding	FALSE	FALSE
ENSDARG00000010244	rpl22l1	0.699122	2.56057	1.03218	ribosomal protein L22-like 1 [Source:ZFIN;Acc:ZDB-GENE-060804-3]	75	76	protein_coding	FALSE	FALSE
ENSDARG00000025581	rpl10	0.699122	2.52769	0.98643	ribosomal protein L10 [Source:ZFIN;Acc:ZDB-GENE-030131-8656]	90	87	protein_coding	FALSE	FALSE
ENSDARG00000044093	rpl13a	0.699122	3.10384	1.69577	ribosomal protein L13a [Source:ZFIN;Acc:ZDB-GENE-030131-168]	79	86	protein_coding	FALSE	FALSE
ENSDARG00000098250	cox7b	0.699122	1.54179	0	cytochrome c oxidase subunit VIIb [Source:ZFIN;Acc:ZDB-GENE-030131-6602]	33	35	protein_coding	TRUE	FALSE
ENSDARG00000009285	rpl15	0.668725	2.21046	0.536958	ribosomal protein L15 [Source:ZFIN;Acc:ZDB-GENE-040801-183]	96	96	protein_coding	FALSE	FALSE
ENSDARG00000010516	rpl21	0.668725	3.00365	1.57962	ribosomal protein L21 [Source:ZFIN;Acc:ZDB-GENE-030131-8512]	86	85	protein_coding	FALSE	FALSE
ENSDARG00000019778	rps6	0.668725	2.08568	0.317904	ribosomal protein S6 [Source:ZFIN;Acc:ZDB-GENE-040801-8]	95	95	protein_coding	FALSE	FALSE
ENSDARG00000025073	rpl18a	0.668725	3.44979	2.06787	ribosomal protein L18a [Source:ZFIN;Acc:ZDB-GENE-040426-1071]	91	91	protein_coding	FALSE	FALSE
ENSDARG00000036008	caly	0.668725	2.17194	0.47307	calcyon neuron-specific vesicular protein [Source:ZFIN;Acc:ZDB-GENE-090313-405]	0	0	protein_coding	TRUE	FALSE
ENSDARG00000040492	mthfd1b	0.668725	3.34503	1.95565	methylenetetrahydrofolate dehydrogenase (NADP+ dependent) 1b [Source:ZFIN;Acc:ZDB-GENE-020905-4]	77	77	protein_coding	FALSE	FALSE
ENSDARG00000071084	wipf1b	0.668725	1.66497	0	WAS/WASL interacting protein family, member 1b [Source:ZFIN;Acc:ZDB-GENE-110815-1]	53	55	protein_coding	FALSE	FALSE
ENSDARG00000099022	faua	0.668725	2.31927	0.701072	Finkel-Biskis-Reilly murine sarcoma virus (FBR-MuSV) ubiquitously expressed a [Source:ZFIN;Acc:ZDB-GENE-040426-1700]	76	76	protein_coding	FALSE	FALSE
ENSDARG00000099416	si.ch211.134a4.2	0.668725	2.61854	1.11008	si:ch211-134a4.2 [Source:ZFIN;Acc:ZDB-GENE-131127-450]	0	0	protein_coding	FALSE	TRUE
ENSDARG00000101337	zgc.103700	0.668725	2.1488	0.436562	zgc:103700 [Source:ZFIN;Acc:ZDB-GENE-041010-13]	23	24	protein_coding	TRUE	TRUE
ENSDARG00000018327	illr3	0.638329	2.72889	1.25086	immune-related, lectin-like receptor 3 [Source:ZFIN;Acc:ZDB-GENE-050311-4]	0	0	protein_coding	TRUE	FALSE
ENSDARG00000042566	rps7	0.638329	2.64082	1.14162	ribosomal protein S7 [Source:ZFIN;Acc:ZDB-GENE-040426-1718]	94	96	protein_coding	FALSE	FALSE
ENSDARG00000051783	rplp0	0.638329	1.54078	0	ribosomal protein, large, P0 [Source:ZFIN;Acc:ZDB-GENE-000629-1]	89	89	protein_coding	FALSE	FALSE
ENSDARG00000092115	eif4a1a	0.638329	1.64385	0	eukaryotic translation initiation factor 4A1A [Source:ZFIN;Acc:ZDB-GENE-031030-2]	90	90	protein_coding	FALSE	FALSE
ENSDARG00000099899	si.dkeyp.51g9.4	0.638329	2.29766	0.669496	si:dkeyp-51g9.4 [Source:ZFIN;Acc:ZDB-GENEP-060503-8]	0	0	protein_coding	FALSE	FALSE
ENSDARG00000103621	FP236553.1	0.638329	2.296	0.667746		0	0	miRNA	NA	NA
ENSDARG00000018958	nrarpb	0.607932	1.65308	0	notch-regulated ankyrin repeat protein b [Source:ZFIN;Acc:ZDB-GENE-030515-7]	69	69	protein_coding	FALSE	FALSE
ENSDARG00000023298	rps27.1	0.607932	3.17033	1.76383	ribosomal protein S27, isoform 1 [Source:ZFIN;Acc:ZDB-GENE-050522-549]	0	0	protein_coding	FALSE	FALSE
ENSDARG00000043453	rps5	0.607932	2.45542	0.886699	ribosomal protein S5 [Source:ZFIN;Acc:ZDB-GENE-020419-12]	96	96	protein_coding	FALSE	FALSE
ENSDARG00000068995	HIST2H2AB..1.to.many.	0.607932	1.5179	0	zgc:101846 [Source:ZFIN;Acc:ZDB-GENE-041010-42]	92	93	protein_coding	FALSE	FALSE
ENSDARG00000070545	top1l	0.607932	1.84598	0	topoisomerase (DNA) I, like [Source:ZFIN;Acc:ZDB-GENE-060616-217]	81	82	protein_coding	FALSE	FALSE
ENSDARG00000071355	si.ch211.197g15.7	0.607932	2.0213	0.189397	si:ch211-197g15.7 [Source:ZFIN;Acc:ZDB-GENE-030131-4763]	0	0	protein_coding	FALSE	FALSE
ENSDARG00000098304	TAOK1..1.to.many.	0.607932	2.16335	0.459285	zgc:112307 [Source:ZFIN;Acc:ZDB-GENE-050522-179]	84	84	protein_coding	FALSE	FALSE
ENSDARG00000104258	CABZ01059421.2	0.607932	1.72797	0		0	0	protein_coding	TRUE	FALSE
ENSDARG00000104375	sec24a	0.607932	2.44435	0.872113	SEC24 homolog A, COPII coat complex component [Source:ZFIN;Acc:ZDB-GENE-120926-1]	57	57	protein_coding	FALSE	FALSE
ENSDARG00000003208	pomk	0.577535	2.23902	0.579857	protein-O-mannose kinase [Source:ZFIN;Acc:ZDB-GENE-041114-119]	52	52	protein_coding	TRUE	FALSE
ENSDARG00000007320	rpl7	0.577535	2.48811	0.933983	ribosomal protein L7 [Source:ZFIN;Acc:ZDB-GENE-030131-8654]	78	78	protein_coding	FALSE	FALSE
ENSDARG00000013705	ccm2	0.577535	1.53221	0	cerebral cavernous malformation 2 [Source:ZFIN;Acc:ZDB-GENE-040712-6]	75	73	protein_coding	FALSE	FALSE
ENSDARG00000014690	rps4x	0.577535	2.36488	0.76762	ribosomal protein S4, X-linked [Source:ZFIN;Acc:ZDB-GENE-040927-19]	93	87	protein_coding	FALSE	FALSE
ENSDARG00000016830	rimkla	0.577535	2.60908	1.09695	ribosomal modification protein rimK-like family member A [Source:ZFIN;Acc:ZDB-GENE-040912-20]	58	64	protein_coding	FALSE	FALSE
ENSDARG00000032129	gtf2f1	0.577535	2.0662	0.284093	general transcription factor IIF, polypeptide 1 [Source:ZFIN;Acc:ZDB-GENE-030131-4557]	68	70	protein_coding	FALSE	FALSE
ENSDARG00000036875	rps12	0.577535	3.3612	1.97376	ribosomal protein S12 [Source:ZFIN;Acc:ZDB-GENE-030131-8951]	96	96	protein_coding	FALSE	FALSE
ENSDARG00000038106	slc37a4a	0.577535	1.68525	0	solute carrier family 37 (glucose-6-phosphate transporter), member 4a [Source:ZFIN;Acc:ZDB-GENE-040426-2230]	74	73	protein_coding	TRUE	FALSE
ENSDARG00000044326	BX950188.1	0.577535	2.42472	0.845284		0	0	protein_coding	FALSE	FALSE
ENSDARG00000062049	hmha1b	0.577535	1.62936	0	histocompatibility (minor) HA-1 b [Source:ZFIN;Acc:ZDB-GENE-071213-2]	49	48	protein_coding	FALSE	FALSE
ENSDARG00000076699	ipmka	0.577535	1.91051	0	inositol polyphosphate multikinase a [Source:ZFIN;Acc:ZDB-GENE-090312-161]	55	51	protein_coding	FALSE	FALSE
ENSDARG00000011405	rps9	0.547139	1.54571	0	ribosomal protein S9 [Source:ZFIN;Acc:ZDB-GENE-010724-15]	95	95	protein_coding	FALSE	FALSE
ENSDARG00000032769	slc38a9	0.547139	2.6425	1.14406	solute carrier family 38, member 9 [Source:ZFIN;Acc:ZDB-GENE-061013-597]	64	64	protein_coding	TRUE	FALSE
ENSDARG00000041619	gnb2l1	0.547139	2.07137	0.292098	guanine nucleotide binding protein (G protein), beta polypeptide 2-like 1 [Source:ZFIN;Acc:ZDB-GENE-990415-89]	96	96	protein_coding	FALSE	FALSE
ENSDARG00000045487	rps16	0.547139	2.41573	0.833933	ribosomal protein S16 [Source:ZFIN;Acc:ZDB-GENE-050506-107]	97	97	protein_coding	FALSE	FALSE
ENSDARG00000056805	plch2b	0.547139	1.50997	0	phospholipase C, eta 2b [Source:ZFIN;Acc:ZDB-GENE-101112-1]	50	50	protein_coding	FALSE	FALSE
ENSDARG00000061904	fhod3b	0.547139	1.95177	0.0588368	formin homology 2 domain containing 3b [Source:ZFIN;Acc:ZDB-GENE-081028-61]	64	65	protein_coding	FALSE	FALSE
ENSDARG00000079175	si.ch211.79k12.1	0.547139	3.0747	1.66097	si:ch211-79k12.1 [Source:ZFIN;Acc:ZDB-GENE-080303-9]	0	0	protein_coding	TRUE	TRUE
ENSDARG00000097886	si.ch1073.172f18.2	0.547139	2.00135	0.155972	si:ch1073-172f18.2 [Source:ZFIN;Acc:ZDB-GENE-070912-3]	0	0	lincRNA	NA	NA
ENSDARG00000098683	zmiz2	0.547139	2.25658	0.604758	zinc finger, MIZ-type containing 2 [Source:ZFIN;Acc:ZDB-GENE-090313-285]	68	69	protein_coding	FALSE	FALSE
ENSDARG00000102273	si.ch211.229l10.9	0.547139	1.53909	0	si:ch211-229l10.9 [Source:ZFIN;Acc:ZDB-GENE-110913-139]	12	12	protein_coding	FALSE	FALSE
ENSDARG00000103436	BX548028.1	0.547139	1.84835	0		0	0	protein_coding	FALSE	FALSE
ENSDARG00000017127	pdzk1ip1	0.516742	2.01845	0.185792	PDZK1 interacting protein 1 [Source:ZFIN;Acc:ZDB-GENE-030616-128]	0	0	protein_coding	TRUE	TRUE
ENSDARG00000041113	wdr18	0.516742	3.53477	2.15736	WD repeat domain 18 [Source:ZFIN;Acc:ZDB-GENE-040905-4]	60	61	protein_coding	FALSE	FALSE
ENSDARG00000054542	IL12B..1.to.many..1	0.516742	2.25221	0.597739	si:ch211-213n8.3 [Source:ZFIN;Acc:ZDB-GENE-091204-37]	25	25	protein_coding	FALSE	TRUE
ENSDARG00000074790	c23h20orf24	0.516742	3.1806	1.77482	c23h20orf24 homolog (H. sapiens) [Source:ZFIN;Acc:ZDB-GENE-030131-5938]	71	65	protein_coding	TRUE	FALSE
ENSDARG00000091176	znf995.1	0.516742	1.88504	0	zinc finger protein 995 [Source:ZFIN;Acc:ZDB-GENE-080215-13]	0	0	protein_coding	FALSE	FALSE
ENSDARG00000092211	si.dkey.258p11.3	0.516742	1.70042	0	si:dkey-258p11.3 [Source:ZFIN;Acc:ZDB-GENE-070705-432]	0	0	processed_transcript	NA	NA
ENSDARG00000092304	si.dkey.59l11.7	0.516742	2.60211	1.09047	si:dkey-59l11.7 [Source:ZFIN;Acc:ZDB-GENE-060503-643]	0	0	protein_coding	FALSE	FALSE
ENSDARG00000098409	si.ch211.117l9.1	0.516742	2.19502	0.508837	si:ch211-117l9.1 [Source:ZFIN;Acc:ZDB-GENE-110914-106]	0	0	unprocessed_pseudogene	NA	NA
ENSDARG00000098928	si.ch211.196h24.1	0.516742	1.78772	0	si:ch211-196h24.1 [Source:ZFIN;Acc:ZDB-GENE-081103-12]	0	0	protein_coding	FALSE	FALSE
ENSDARG00000099332	si.ch211.134a4.4	0.516742	1.68725	0	si:ch211-134a4.4 [Source:ZFIN;Acc:ZDB-GENE-131127-265]	0	0	protein_coding	FALSE	FALSE
ENSDARG00000101648	si.ch73.351f10.4	0.516742	1.72654	0	si:ch73-351f10.4 [Source:ZFIN;Acc:ZDB-GENE-141216-212]	0	0	antisense	NA	NA
ENSDARG00000102716	si.ch211.246b8.8	0.516742	2.15948	0.451987	si:ch211-246b8.8 [Source:ZFIN;Acc:ZDB-GENE-110914-35]	0	0	unprocessed_pseudogene	NA	NA
ENSDARG00000102851	CABZ01051012.1	0.516742	1.73005	0		0	0	protein_coding	TRUE	FALSE
ENSDARG00000103218	si.dkey.27n6.11	0.516742	1.6304	0	si:dkey-27n6.11 [Source:ZFIN;Acc:ZDB-GENE-070912-499]	0	0	unprocessed_pseudogene	NA	NA
ENSDARG00000105288	si.ch211.79l17.1	0.516742	2.11489	0.36859	si:ch211-79l17.1 [Source:ZFIN;Acc:ZDB-GENE-050419-127]	65	66	protein_coding	FALSE	FALSE
ENSDARG00000003068	gorasp1a	0.486346	1.6732	0	golgi reassembly stacking protein 1a [Source:ZFIN;Acc:ZDB-GENE-030826-23]	37	39	protein_coding	FALSE	FALSE
ENSDARG00000021838	rps23	0.486346	2.30112	0.672677	ribosomal protein S23 [Source:ZFIN;Acc:ZDB-GENE-080220-50]	99	99	protein_coding	FALSE	FALSE
ENSDARG00000022599	dnpep	0.486346	2.87894	1.43424	aspartyl aminopeptidase [Source:ZFIN;Acc:ZDB-GENE-040426-852]	69	69	protein_coding	FALSE	FALSE
ENSDARG00000032552	2005-03-01	0.486346	1.93395	0.0255838	membrane-associated ring finger (C3HC4) 5 [Source:ZFIN;Acc:ZDB-GENE-070424-47]	95	95	protein_coding	TRUE	FALSE
ENSDARG00000038473	ube2d3	0.486346	3.48346	2.10202	ubiquitin-conjugating enzyme E2D 3 [Source:ZFIN;Acc:ZDB-GENE-030131-551]	0	0	protein_coding	FALSE	FALSE
ENSDARG00000055523	slc22a6l	0.486346	2.10267	0.350029	solute carrier family 22 (organic anion transporter), member 6, like [Source:ZFIN;Acc:ZDB-GENE-040426-2249]	47	47	protein_coding	TRUE	FALSE
ENSDARG00000059610	gpr146	0.486346	2.54584	1.01303	G protein-coupled receptor 146 [Source:ZFIN;Acc:ZDB-GENE-050823-3]	61	62	protein_coding	TRUE	FALSE
ENSDARG00000061864	hdlbpb	0.486346	2.65646	1.16212	high density lipoprotein binding protein b [Source:ZFIN;Acc:ZDB-GENE-030131-6822]	0	0	protein_coding	FALSE	FALSE
ENSDARG00000079588	gatsl3.1	0.486346	1.88491	0	GATS protein-like 3 [Source:ZFIN;Acc:ZDB-GENE-050327-38]	67	68	protein_coding	FALSE	FALSE
ENSDARG00000088650	TSNARE1	0.486346	1.82827	0	si:ch211-208k15.1 [Source:ZFIN;Acc:ZDB-GENE-100922-189]	0	54	protein_coding	TRUE	FALSE
ENSDARG00000105237	MCC	0.486346	3.07909	1.66636	mutated in colorectal cancers [Source:HGNC Symbol;Acc:HGNC:6935]	85	84	protein_coding	FALSE	FALSE
ENSDARG00000105315	si.cabz01057506.1	0.486346	1.92722	0.0134713	si:cabz01057506.1 [Source:ZFIN;Acc:ZDB-GENE-160114-80]	NA	NA	protein_coding	NA	NA
ENSDARG00000007553	opn4.1	0.455949	1.58527	0	opsin 4.1 [Source:ZFIN;Acc:ZDB-GENE-030314-2]	49	47	protein_coding	TRUE	FALSE
ENSDARG00000011825	cetn3	0.455949	1.75693	0	centrin 3 [Source:ZFIN;Acc:ZDB-GENE-050522-152]	84	84	protein_coding	FALSE	FALSE
ENSDARG00000015901	ptbp2b	0.455949	3.31153	1.92314	polypyrimidine tract binding protein 2b [Source:ZFIN;Acc:ZDB-GENE-060810-49]	79	79	protein_coding	FALSE	FALSE
ENSDARG00000029372	rasa4	0.455949	1.92691	0.0132787	RAS p21 protein activator 4 [Source:ZFIN;Acc:ZDB-GENE-060526-349]	62	62	protein_coding	FALSE	FALSE
ENSDARG00000029766	nr1i2	0.455949	2.48462	0.930078	nuclear receptor subfamily 1, group I, member 2 [Source:ZFIN;Acc:ZDB-GENE-030903-3]	46	46	protein_coding	FALSE	FALSE
ENSDARG00000034568	fitm2	0.455949	2.53293	0.992792	fat storage-inducing transmembrane protein 2 [Source:ZFIN;Acc:ZDB-GENE-050508-5]	48	46	protein_coding	TRUE	FALSE
ENSDARG00000034753	tspan3a	0.455949	2.47316	0.913995	tetraspanin 3a [Source:ZFIN;Acc:ZDB-GENE-030131-7787]	85	87	protein_coding	TRUE	FALSE
ENSDARG00000035692	rps3a	0.455949	1.89412	0	ribosomal protein S3A [Source:ZFIN;Acc:ZDB-GENE-030131-9184]	93	93	protein_coding	FALSE	FALSE
ENSDARG00000052789	azin1a	0.455949	1.89707	0	antizyme inhibitor 1a [Source:ZFIN;Acc:ZDB-GENE-050417-20]	51	52	protein_coding	FALSE	FALSE
ENSDARG00000054054	zgc.153219	0.455949	2.23308	0.571096	zgc:153219 [Source:ZFIN;Acc:ZDB-GENE-060929-144]	54	54	protein_coding	FALSE	TRUE
ENSDARG00000055996	rps8a	0.455949	2.58704	1.0688	ribosomal protein S8a [Source:ZFIN;Acc:ZDB-GENE-030131-8626]	0	0	protein_coding	FALSE	FALSE
ENSDARG00000056467	tmub2	0.455949	1.99598	0.14835	transmembrane and ubiquitin-like domain containing 2 [Source:ZFIN;Acc:ZDB-GENE-030616-254]	48	49	protein_coding	TRUE	FALSE
ENSDARG00000059653	kdm2aa	0.455949	3.06159	1.65016	lysine (K)-specific demethylase 2Aa [Source:ZFIN;Acc:ZDB-GENE-061215-144]	46	46	protein_coding	FALSE	FALSE
ENSDARG00000060515	zdhhc9	0.455949	2.11107	0.361991	zinc finger, DHHC-type containing 9 [Source:ZFIN;Acc:ZDB-GENE-071004-8]	70	71	protein_coding	TRUE	FALSE
ENSDARG00000062235	lrrc34	0.455949	1.85702	0	leucine rich repeat containing 34 [Source:ZFIN;Acc:ZDB-GENE-091118-73]	48	48	protein_coding	FALSE	FALSE
ENSDARG00000068161	si.dkey.16p6.4	0.455949	2.27028	0.625799	si:dkey-16p6.4 [Source:ZFIN;Acc:ZDB-GENE-110913-5]	0	0	protein_coding	FALSE	FALSE
ENSDARG00000071652	RRP8	0.455949	2.58017	1.05853	si:ch211-149e23.3 [Source:ZFIN;Acc:ZDB-GENE-030131-8898]	31	32	protein_coding	FALSE	FALSE
ENSDARG00000076820	xkr8.2	0.455949	2.06028	0.271984	XK, Kell blood group complex subunit-related family, member 8, tandem duplicate 2 [Source:ZFIN;Acc:ZDB-GENE-110106-2]	32	32	protein_coding	TRUE	FALSE
ENSDARG00000079985	nrip2	0.455949	1.65556	0	nuclear receptor interacting protein 2 [Source:ZFIN;Acc:ZDB-GENE-030131-9425]	35	36	protein_coding	FALSE	FALSE
ENSDARG00000088836	RNH1..1.to.many..19	0.455949	1.51429	0	si:dkey-16p6.1 [Source:ZFIN;Acc:ZDB-GENE-081103-43]	0	0	protein_coding	FALSE	FALSE
ENSDARG00000093999	TTF1..1.to.many.	0.455949	1.64924	0	si:ch73-376l24.6 [Source:ZFIN;Acc:ZDB-GENE-100921-87]	28	26	protein_coding	FALSE	FALSE
ENSDARG00000097332	si.ch73.195j15.1	0.455949	1.8794	0	si:ch73-195j15.1 [Source:ZFIN;Acc:ZDB-GENE-131121-561]	0	0	lincRNA	NA	NA
ENSDARG00000098337	CABZ01002281.1	0.455949	1.63136	0		0	0	protein_coding	FALSE	TRUE
ENSDARG00000099321	btbd17a	0.455949	1.70964	0	BTB (POZ) domain containing 17a [Source:ZFIN;Acc:ZDB-GENE-130531-68]	52	54	protein_coding	TRUE	FALSE
ENSDARG00000100460	si.dkey.217g21.3	0.455949	1.74507	0	si:dkey-217g21.3 [Source:ZFIN;Acc:ZDB-GENE-110913-15]	0	0	protein_coding	FALSE	FALSE
ENSDARG00000101283	si.ch211.106g8.18	0.455949	3.97534	2.62458	si:ch211-106g8.18 [Source:ZFIN;Acc:ZDB-GENE-141212-66]	0	0	TR_V_gene	FALSE	TRUE
ENSDARG00000102750	cdh1	0.455949	1.59814	0	cadherin 1, type 1, E-cadherin (epithelial) [Source:ZFIN;Acc:ZDB-GENE-010606-1]	45	45	protein_coding	TRUE	TRUE
ENSDARG00000102765	lonp1	0.455949	2.08085	0.310519	lon peptidase 1, mitochondrial [Source:ZFIN;Acc:ZDB-GENE-030131-4006]	74	75	protein_coding	FALSE	FALSE
ENSDARG00000103176	nr5a1a	0.455949	1.6621	0	nuclear receptor subfamily 5, group A, member 1a [Source:ZFIN;Acc:ZDB-GENE-010504-1]	57	57	protein_coding	FALSE	FALSE
ENSDARG00000104011	rps17	0.455949	2.22679	0.560933	ribosomal protein S17 [Source:ZFIN;Acc:ZDB-GENE-040426-1852]	0	0	protein_coding	FALSE	FALSE
ENSDARG00000105399	si.ch73.158o8.1	0.455949	2.70873	1.22554	si:ch73-158o8.1 [Source:ZFIN;Acc:ZDB-GENE-160113-157]	NA	NA	lincRNA	NA	NA
ENSDARG00000004771	ankrd10b	0.425552	1.83007	0	ankyrin repeat domain 10b [Source:ZFIN;Acc:ZDB-GENE-061013-49]	45	47	protein_coding	FALSE	FALSE
ENSDARG00000007358	cxcr3.1	0.425552	1.52852	0	chemokine (C-X-C motif) receptor 3, tandem duplicate 1 [Source:ZFIN;Acc:ZDB-GENE-060130-38]	40	39	protein_coding	TRUE	FALSE
ENSDARG00000009764	srek1	0.425552	3.33416	1.94567	splicing regulatory glutamine/lysine-rich protein 1 [Source:ZFIN;Acc:ZDB-GENE-040801-132]	44	62	protein_coding	FALSE	FALSE
ENSDARG00000010266	igf2bp3	0.425552	2.49058	0.934645	insulin-like growth factor 2 mRNA binding protein 3 [Source:ZFIN;Acc:ZDB-GENE-000308-1]	73	74	protein_coding	FALSE	FALSE
ENSDARG00000012177	rab4b	0.425552	2.15816	0.450177	RAB4B, member RAS oncogene family [Source:ZFIN;Acc:ZDB-GENE-040822-15]	91	92	protein_coding	FALSE	FALSE
ENSDARG00000013016	pole4	0.425552	1.63021	0	polymerase (DNA-directed), epsilon 4, accessory subunit [Source:ZFIN;Acc:ZDB-GENE-050522-309]	37	38	protein_coding	FALSE	FALSE
ENSDARG00000016743	angel2	0.425552	2.11338	0.366245	angel homolog 2 (Drosophila) [Source:ZFIN;Acc:ZDB-GENE-030131-6498]	45	46	protein_coding	FALSE	FALSE
ENSDARG00000021150	valopa	0.425552	1.72493	0	vertebrate ancient long opsin a [Source:ZFIN;Acc:ZDB-GENE-000427-4]	0	0	protein_coding	TRUE	FALSE
ENSDARG00000029533	rpl18	0.425552	2.0273	0.201598	ribosomal protein L18 [Source:ZFIN;Acc:ZDB-GENE-040801-165]	86	86	protein_coding	FALSE	FALSE
ENSDARG00000042905	rpl10a	0.425552	2.26495	0.617373	ribosomal protein L10a [Source:ZFIN;Acc:ZDB-GENE-030131-2025]	92	92	protein_coding	FALSE	FALSE
ENSDARG00000043395	crip3	0.425552	1.67287	0	cysteine-rich protein 3 [Source:ZFIN;Acc:ZDB-GENE-130530-620]	61	68	protein_coding	FALSE	FALSE
ENSDARG00000044774	pou5f3	0.425552	2.85721	1.40597	POU domain, class 5, transcription factor 3 [Source:ZFIN;Acc:ZDB-GENE-980526-485]	20	29	protein_coding	FALSE	FALSE
ENSDARG00000054916	eif4ebp3	0.425552	2.19435	0.508432	eukaryotic translation initiation factor 4E binding protein 3 [Source:ZFIN;Acc:ZDB-GENE-041114-44]	49	50	protein_coding	FALSE	FALSE
ENSDARG00000059175	cep19.1	0.425552	1.70636	0	centrosomal protein 19 [Source:ZFIN;Acc:ZDB-GENE-050913-81]	54	52	protein_coding	FALSE	FALSE
ENSDARG00000062146	larp4b	0.425552	2.88693	1.44228	La ribonucleoprotein domain family, member 4B [Source:ZFIN;Acc:ZDB-GENE-061027-39]	44	43	protein_coding	FALSE	FALSE
ENSDARG00000074225	si.ch211.269e2.1	0.425552	3.41901	2.04011	si:ch211-269e2.1 [Source:ZFIN;Acc:ZDB-GENE-070912-267]	0	0	protein_coding	FALSE	FALSE
ENSDARG00000095947	adkb	0.425552	2.73764	1.26077	adenosine kinase b [Source:ZFIN;Acc:ZDB-GENE-030131-948]	79	79	protein_coding	FALSE	FALSE
ENSDARG00000098777	AIM1L	0.425552	1.56365	0	absent in melanoma 1-like [Source:HGNC Symbol;Acc:HGNC:17295]	15	15	protein_coding	FALSE	FALSE
ENSDARG00000098783	polr2b	0.425552	2.28479	0.648319	polymerase (RNA) II (DNA directed) polypeptide B [Source:ZFIN;Acc:ZDB-GENE-041008-1]	97	97	protein_coding	FALSE	FALSE
ENSDARG00000100096	CU855936.1	0.425552	1.64843	0		0	0	protein_coding	TRUE	FALSE
ENSDARG00000102148	CABZ01034089.1	0.425552	1.8939	0		0	0	protein_coding	FALSE	FALSE
ENSDARG00000102378	CABZ01003056.1	0.425552	1.78832	0		0	0	protein_coding	FALSE	FALSE
ENSDARG00000104478	cap2	0.425552	1.65316	0	CAP, adenylate cyclase-associated protein, 2 (yeast) [Source:ZFIN;Acc:ZDB-GENE-040426-1758]	62	62	protein_coding	FALSE	FALSE
ENSDARG00000104679	si.dkey.20i10.5	0.425552	1.5651	0	si:dkey-20i10.5 [Source:ZFIN;Acc:ZDB-GENE-090312-80]	0	0	sense_intronic	NA	NA
ENSDARG00000001712	si.ch211.247n2.1	0.395156	1.5492	0	si:ch211-247n2.1 [Source:ZFIN;Acc:ZDB-GENE-141216-101]	48	49	protein_coding	TRUE	FALSE
ENSDARG00000007886	slc35b2	0.395156	1.68592	0	solute carrier family 35 (adenosine 3'-phospho 5'-phosphosulfate transporter), member B2 [Source:ZFIN;Acc:ZDB-GENE-050213-1]	64	69	protein_coding	TRUE	TRUE
ENSDARG00000019360	sec23b	0.395156	1.92246	0.00404934	Sec23 homolog B, COPII coat complex component [Source:ZFIN;Acc:ZDB-GENE-030131-5479]	85	85	protein_coding	FALSE	FALSE
ENSDARG00000020218	amfr	0.395156	1.93402	0.0255838	autocrine motility factor receptor, E3 ubiquitin protein ligase a [Source:ZFIN;Acc:ZDB-GENE-040426-2190]	70	70	protein_coding	TRUE	FALSE
ENSDARG00000025220	sppl3	0.395156	1.59172	0	signal peptide peptidase 3 [Source:ZFIN;Acc:ZDB-GENE-050913-71]	94	94	protein_coding	TRUE	FALSE
ENSDARG00000035535	rasa1a	0.395156	2.09437	0.335113	RAS p21 protein activator (GTPase activating protein) 1a [Source:ZFIN;Acc:ZDB-GENE-030131-4694]	80	80	protein_coding	FALSE	FALSE
ENSDARG00000036316	rpl39	0.395156	2.35169	0.74842	ribosomal protein L39 [Source:ZFIN;Acc:ZDB-GENE-040625-51]	96	90	protein_coding	FALSE	FALSE
ENSDARG00000039164	FCGRT..1.to.many..4	0.395156	3.33936	1.95097	Fc fragment of IgG, receptor, transporter, alpha [Source:HGNC Symbol;Acc:HGNC:3621]	0	0	protein_coding	TRUE	TRUE
ENSDARG00000052617	raver1	0.395156	2.01074	0.172527	ribonucleoprotein, PTB-binding 1 [Source:ZFIN;Acc:ZDB-GENE-050522-99]	47	46	protein_coding	FALSE	FALSE
ENSDARG00000055974	tpmt.1	0.395156	1.89691	0	thiopurine S-methyltransferase, tandem duplicate 1 [Source:ZFIN;Acc:ZDB-GENE-050522-141]	50	51	protein_coding	FALSE	FALSE
ENSDARG00000061352	bcl11aa	0.395156	1.77222	0	B-cell CLL/lymphoma 11Aa [Source:ZFIN;Acc:ZDB-GENE-060421-4643]	76	77	protein_coding	FALSE	FALSE
ENSDARG00000068969	zgc.153759	0.395156	3.33211	1.94511	zgc:153759 [Source:ZFIN;Acc:ZDB-GENE-060825-148]	27	25	protein_coding	TRUE	TRUE
ENSDARG00000075143	nanp	0.395156	1.65796	0	N-acetylneuraminic acid phosphatase [Source:ZFIN;Acc:ZDB-GENE-050522-94]	49	49	protein_coding	FALSE	FALSE
ENSDARG00000075389	si.ch211.281g13.4	0.395156	1.57407	0	si:ch211-281g13.4 [Source:ZFIN;Acc:ZDB-GENE-090311-16]	0	0	protein_coding	FALSE	FALSE
ENSDARG00000076280	ppp1r1b	0.395156	1.73694	0	protein phosphatase 1, regulatory (inhibitor) subunit 1B [Source:ZFIN;Acc:ZDB-GENE-120126-1]	35	36	protein_coding	FALSE	FALSE
ENSDARG00000076888	GANAB..1.to.many.	0.395156	2.84721	1.39709	zgc:171967 [Source:ZFIN;Acc:ZDB-GENE-070928-36]	63	63	protein_coding	TRUE	TRUE
ENSDARG00000089304	si.dkeyp.4f2.1	0.395156	1.6829	0	si:dkeyp-4f2.1 [Source:ZFIN;Acc:ZDB-GENE-081103-33]	0	0	protein_coding	FALSE	FALSE
ENSDARG00000096753	si.ch211.105d18.6	0.395156	1.51234	0	si:ch211-105d18.6 [Source:ZFIN;Acc:ZDB-GENE-130531-74]	0	0	antisense	NA	NA
ENSDARG00000098134	CABZ01111946.1	0.395156	1.55506	0		0	0	protein_coding	FALSE	FALSE
ENSDARG00000098279	si.dkey.205i10.1	0.395156	2.21097	0.537484	si:dkey-205i10.1 [Source:ZFIN;Acc:ZDB-GENE-081104-499]	0	0	protein_coding	FALSE	FALSE
ENSDARG00000102040	linc.mir30e.2	0.395156	1.56581	0	linc RNA mir30e-2 [Source:ZFIN;Acc:ZDB-GENE-141216-251]	0	0	lincRNA	NA	NA
ENSDARG00000002659	mapre1b	0.364759	1.69345	0	microtubule-associated protein, RP/EB family, member 1b [Source:ZFIN;Acc:ZDB-GENE-040426-2256]	73	72	protein_coding	FALSE	FALSE
ENSDARG00000029252	ssb	0.364759	2.22559	0.559497	Sjogren syndrome antigen B (autoantigen La) [Source:ZFIN;Acc:ZDB-GENE-030131-223]	51	56	protein_coding	FALSE	FALSE
ENSDARG00000043077	nisch	0.364759	2.97936	1.55294	nischarin [Source:ZFIN;Acc:ZDB-GENE-050208-570]	49	50	protein_coding	FALSE	FALSE
ENSDARG00000053370	eif3jb	0.364759	2.48827	0.933983	eukaryotic translation initiation factor 3, subunit Jb [Source:ZFIN;Acc:ZDB-GENE-040426-2900]	60	61	protein_coding	FALSE	FALSE
ENSDARG00000054818	rpl32	0.364759	2.04195	0.23312	ribosomal protein L32 [Source:ZFIN;Acc:ZDB-GENE-060331-105]	92	92	protein_coding	FALSE	FALSE
ENSDARG00000055585	c1galt1a	0.364759	1.80947	0	core 1 synthase, glycoprotein-N-acetylgalactosamine 3-beta-galactosyltransferase, 1a [Source:ZFIN;Acc:ZDB-GENE-061013-303]	0	0	protein_coding	TRUE	FALSE
ENSDARG00000059841	exosc1	0.364759	3.9415	2.59269	exosome component 1 [Source:ZFIN;Acc:ZDB-GENE-080926-3]	77	79	protein_coding	FALSE	FALSE
ENSDARG00000063718	vps72	0.364759	2.54786	1.01492	vacuolar protein sorting 72 homolog (S. cerevisiae) [Source:ZFIN;Acc:ZDB-GENE-060503-88]	59	59	protein_coding	FALSE	FALSE
ENSDARG00000070453	gch1	0.364759	2.17366	0.476087	GTP cyclohydrolase 1 [Source:ZFIN;Acc:ZDB-GENE-070720-5]	72	73	protein_coding	FALSE	FALSE
ENSDARG00000075129	mrps11	0.364759	2.50501	0.955167	mitochondrial ribosomal protein S11 [Source:ZFIN;Acc:ZDB-GENE-040724-84]	43	39	protein_coding	FALSE	FALSE
ENSDARG00000079829	si.ch211.207g17.2	0.364759	1.88383	0	si:ch211-207g17.2 [Source:ZFIN;Acc:ZDB-GENE-160113-79]	0	0	protein_coding	TRUE	FALSE
ENSDARG00000079932	zgc.152830	0.364759	2.25051	0.595264	zgc:152830 [Source:ZFIN;Acc:ZDB-GENE-090312-55]	0	0	protein_coding	FALSE	FALSE
ENSDARG00000089698	atf7ip2	0.364759	3.64805	2.27872	activating transcription factor 7 interacting protein 2 [Source:ZFIN;Acc:ZDB-GENE-131121-384]	20	23	protein_coding	FALSE	FALSE
ENSDARG00000091086	ALX3	0.364759	1.66896	0	ALX homeobox 3 [Source:HGNC Symbol;Acc:HGNC:449]	46	45	protein_coding	FALSE	FALSE
ENSDARG00000091931	gpatch4	0.364759	1.7444	0	G patch domain containing 4 [Source:ZFIN;Acc:ZDB-GENE-041008-158]	29	26	protein_coding	FALSE	FALSE
ENSDARG00000094500	si.ch211.238e22.4	0.364759	3.01783	1.59564	si:ch211-238e22.4 [Source:ZFIN;Acc:ZDB-GENE-030131-3632]	0	0	protein_coding	FALSE	FALSE
ENSDARG00000104146	BX465848.1	0.364759	1.54589	0		0	0	protein_coding	FALSE	FALSE
ENSDARG00000015862	rpl5b	0.334363	1.87229	0	ribosomal protein L5b [Source:ZFIN;Acc:ZDB-GENE-040625-93]	86	87	protein_coding	FALSE	FALSE
ENSDARG00000017780	rorcb	0.334363	1.55803	0	RAR-related orphan receptor C b [Source:ZFIN;Acc:ZDB-GENE-040724-215]	0	0	protein_coding	FALSE	FALSE
ENSDARG00000020197	rpl5a	0.334363	1.56984	0	ribosomal protein L5a [Source:ZFIN;Acc:ZDB-GENE-030131-5161]	84	85	protein_coding	FALSE	FALSE
ENSDARG00000021864	rplp1	0.334363	1.86283	0	ribosomal protein, large, P1 [Source:ZFIN;Acc:ZDB-GENE-030131-8663]	77	81	protein_coding	FALSE	FALSE
ENSDARG00000035860	rps28	0.334363	1.88655	0	ribosomal protein S28 [Source:ZFIN;Acc:ZDB-GENE-030131-2022]	96	96	protein_coding	FALSE	FALSE
ENSDARG00000036070	znrd1	0.334363	2.89214	1.4466	zinc ribbon domain containing 1 [Source:ZFIN;Acc:ZDB-GENE-050320-131]	56	54	protein_coding	FALSE	FALSE
ENSDARG00000040557	exosc5	0.334363	2.49773	0.94596	exosome component 5 [Source:ZFIN;Acc:ZDB-GENE-060503-675]	62	61	protein_coding	FALSE	FALSE
ENSDARG00000043055	hiat1b	0.334363	2.69011	1.20209	hippocampus abundant transcript 1b [Source:ZFIN;Acc:ZDB-GENE-040426-2935]	86	86	protein_coding	TRUE	FALSE
ENSDARG00000044365	angptl3	0.334363	1.94389	0.0431486	angiopoietin-like 3 [Source:ZFIN;Acc:ZDB-GENE-010817-3]	45	44	protein_coding	FALSE	TRUE
ENSDARG00000045019	aamp	0.334363	1.53051	0	angio-associated, migratory cell protein [Source:ZFIN;Acc:ZDB-GENE-040426-2370]	62	62	protein_coding	FALSE	FALSE
ENSDARG00000045543	atp6v1f	0.334363	2.02237	0.191497	ATPase, H+ transporting, lysosomal, V1 subunit F [Source:ZFIN;Acc:ZDB-GENE-040718-259]	83	83	protein_coding	FALSE	FALSE
ENSDARG00000058105	rpl36a	0.334363	2.03857	0.225458	ribosomal protein L36A [Source:ZFIN;Acc:ZDB-GENE-020423-1]	98	97	protein_coding	FALSE	FALSE
ENSDARG00000070723	ndufa9a	0.334363	1.68421	0	NADH dehydrogenase (ubiquinone) 1 alpha subcomplex, 9a [Source:ZFIN;Acc:ZDB-GENE-050320-20]	60	61	protein_coding	FALSE	FALSE
ENSDARG00000075225	si.ch211.223a10.1	0.334363	1.54032	0	si:ch211-223a10.1 [Source:ZFIN;Acc:ZDB-GENE-090313-86]	0	0	protein_coding	TRUE	FALSE
ENSDARG00000076025	dgkzb	0.334363	1.70893	0	diacylglycerol kinase, zeta b [Source:ZFIN;Acc:ZDB-GENE-111104-4]	56	56	protein_coding	FALSE	FALSE
ENSDARG00000076074	dda1	0.334363	2.13396	0.404132	DET1 and DDB1 associated 1 [Source:ZFIN;Acc:ZDB-GENE-040426-2137]	87	87	protein_coding	FALSE	FALSE
ENSDARG00000076371	SHROOM2..1.to.many.	0.334363	1.52406	0	shroom family member 2 [Source:HGNC Symbol;Acc:HGNC:630]	35	37	protein_coding	FALSE	FALSE
ENSDARG00000087327	cbx8a	0.334363	2.68011	1.18965	chromobox homolog 8a (Pc class homolog, Drosophila) [Source:ZFIN;Acc:ZDB-GENE-040405-1]	44	43	protein_coding	FALSE	FALSE
ENSDARG00000087788	RNH1..1.to.many..36	0.334363	1.58374	0	si:ch211-22k7.9 [Source:ZFIN;Acc:ZDB-GENE-070424-160]	0	0	protein_coding	FALSE	FALSE
ENSDARG00000088222	fam78ab	0.334363	1.50232	0	family with sequence similarity 78, member Ab [Source:ZFIN;Acc:ZDB-GENE-080220-25]	71	71	protein_coding	FALSE	FALSE
ENSDARG00000090734	si.dkey.196n19.2	0.334363	1.96046	0.0774824	si:dkey-196n19.2 [Source:ZFIN;Acc:ZDB-GENE-081104-8]	0	0	protein_coding	FALSE	FALSE
ENSDARG00000092979	pias2	0.334363	2.77195	1.3028	protein inhibitor of activated STAT, 2 [Source:ZFIN;Acc:ZDB-GENE-060424-1]	70	71	protein_coding	FALSE	FALSE
ENSDARG00000094309	si.ch73.92e7.6	0.334363	2.17763	0.481736	si:ch73-92e7.6 [Source:ZFIN;Acc:ZDB-GENE-081031-35]	36	33	protein_coding	FALSE	FALSE
ENSDARG00000099106	afmid	0.334363	3.57675	2.19977	arylformamidase [Source:ZFIN;Acc:ZDB-GENE-050417-166]	48	48	protein_coding	FALSE	FALSE
ENSDARG00000100446	si.ch211.286o17.1	0.334363	1.54138	0	si:ch211-286o17.1 [Source:ZFIN;Acc:ZDB-GENE-141216-411]	0	0	protein_coding	TRUE	TRUE
ENSDARG00000104078	zgc.113336	0.334363	1.81699	0	zgc:113336 [Source:ZFIN;Acc:ZDB-GENE-050320-55]	0	0	protein_coding	FALSE	FALSE
ENSDARG00000104281	ZNF74..1.to.many..3	0.334363	1.65096	0	zinc finger protein 74 [Source:HGNC Symbol;Acc:HGNC:13144]	42	46	protein_coding	FALSE	FALSE
ENSDARG00000014867	rpl8	0.303966	1.51352	0	ribosomal protein L8 [Source:ZFIN;Acc:ZDB-GENE-040426-1670]	97	97	protein_coding	FALSE	FALSE
ENSDARG00000014915	ndufab1b	0.303966	1.67665	0	NADH dehydrogenase (ubiquinone) 1, alpha/beta subcomplex, 1b [Source:ZFIN;Acc:ZDB-GENE-030131-4437]	67	63	protein_coding	FALSE	FALSE
ENSDARG00000017272	eapp	0.303966	2.31076	0.688668	e2f-associated phosphoprotein [Source:ZFIN;Acc:ZDB-GENE-030131-5529]	57	58	protein_coding	FALSE	FALSE
ENSDARG00000019364	mbip	0.303966	3.27808	1.88386	MAP3K12 binding inhibitory protein 1 [Source:ZFIN;Acc:ZDB-GENE-060810-43]	46	46	protein_coding	FALSE	FALSE
ENSDARG00000023003	ccdc12	0.303966	3.02647	1.60688	coiled-coil domain containing 12 [Source:ZFIN;Acc:ZDB-GENE-040801-108]	67	66	protein_coding	FALSE	FALSE
ENSDARG00000035264	riok2	0.303966	1.65178	0	RIO kinase 2 (yeast) [Source:ZFIN;Acc:ZDB-GENE-040426-2913]	68	70	protein_coding	FALSE	FALSE
ENSDARG00000053517	EML5	0.303966	1.89716	0	si:dkey-1f12.3 [Source:ZFIN;Acc:ZDB-GENE-030131-1677]	85	85	protein_coding	FALSE	FALSE
ENSDARG00000056829	CR559945.1	0.303966	2.32475	0.71004		0	0	protein_coding	TRUE	FALSE
ENSDARG00000057772	march7.1	0.303966	2.51272	0.963973	membrane-associated ring finger (C3HC4) 7 [Source:ZFIN;Acc:ZDB-GENE-080204-121]	36	37	protein_coding	FALSE	FALSE
ENSDARG00000059075	nip7	0.303966	3.49488	2.1143	NIP7, nucleolar pre-rRNA processing protein [Source:ZFIN;Acc:ZDB-GENE-050522-256]	82	82	protein_coding	FALSE	FALSE
ENSDARG00000060069	isoc1	0.303966	1.70768	0	isochorismatase domain containing 1 [Source:ZFIN;Acc:ZDB-GENE-061020-1]	82	82	protein_coding	FALSE	FALSE
ENSDARG00000069116	timm10	0.303966	2.44351	0.871287	translocase of inner mitochondrial membrane 10 homolog (yeast) [Source:ZFIN;Acc:ZDB-GENE-040718-427]	80	80	protein_coding	FALSE	FALSE
ENSDARG00000079126	si.dkey.250i3.3	0.303966	1.95276	0.0596005	si:dkey-250i3.3 [Source:ZFIN;Acc:ZDB-GENE-110131-5]	0	0	protein_coding	FALSE	FALSE
ENSDARG00000087623	si.dkey.119g10.5	0.303966	1.96277	0.0817965	si:dkey-119g10.5 [Source:ZFIN;Acc:ZDB-GENE-110411-278]	0	0	lincRNA	NA	NA
ENSDARG00000090617	CTIF	0.303966	1.59456	0	CBP80/20-dependent translation initiation factor [Source:HGNC Symbol;Acc:HGNC:23925]	59	58	protein_coding	FALSE	FALSE
ENSDARG00000099698	si.dkeyp.80d11.11	0.303966	1.51461	0	si:dkeyp-80d11.11 [Source:ZFIN;Acc:ZDB-GENE-070424-272]	0	0	unprocessed_pseudogene	NA	NA
ENSDARG00000102482	CYSTM1..1.to.many.	0.303966	3.44556	2.06417	zgc:165573 [Source:ZFIN;Acc:ZDB-GENE-070615-27]	0	0	protein_coding	FALSE	FALSE
ENSDARG00000102575	si.ch211.106j21.2	0.303966	1.61381	0	si:ch211-106j21.2 [Source:ZFIN;Acc:ZDB-GENE-081103-42]	0	0	protein_coding	FALSE	FALSE
ENSDARG00000002967	pdap1b	0.273569	1.85863	0	pdgfa associated protein 1b [Source:ZFIN;Acc:ZDB-GENE-040426-942]	69	69	protein_coding	FALSE	FALSE
ENSDARG00000029500	rpl34	0.273569	1.56935	0	ribosomal protein L34 [Source:ZFIN;Acc:ZDB-GENE-040426-1033]	89	89	protein_coding	FALSE	FALSE
ENSDARG00000034291	rpl37.2	0.273569	1.8007	0	ribosomal protein L37 [Source:ZFIN;Acc:ZDB-GENE-040625-39]	93	93	protein_coding	FALSE	FALSE
ENSDARG00000039022	stk25b	0.273569	2.58374	1.06452	serine/threonine kinase 25b [Source:ZFIN;Acc:ZDB-GENE-040426-2537]	83	83	protein_coding	FALSE	FALSE
ENSDARG00000045527	nr2c1	0.273569	1.82759	0	nuclear receptor subfamily 2, group C, member 1 [Source:ZFIN;Acc:ZDB-GENE-041210-198]	49	50	protein_coding	FALSE	FALSE
ENSDARG00000056443	zgc.152753	0.273569	1.83359	0	zgc:152753 [Source:ZFIN;Acc:ZDB-GENE-060818-8]	0	0	protein_coding	FALSE	FALSE
ENSDARG00000071492	fbxo45	0.273569	2.37167	0.775	F-box protein 45 [Source:ZFIN;Acc:ZDB-GENE-040426-1450]	78	77	protein_coding	FALSE	FALSE
ENSDARG00000073705	rbfa	0.273569	1.91481	0	ribosome binding factor A [Source:ZFIN;Acc:ZDB-GENE-070410-83]	32	33	protein_coding	FALSE	FALSE
ENSDARG00000077227	fbxl6	0.273569	1.91942	0	F-box and leucine-rich repeat protein 6 [Source:ZFIN;Acc:ZDB-GENE-060810-162]	33	34	protein_coding	FALSE	FALSE
ENSDARG00000079751	megf8.1	0.273569	2.23611	0.57531	multiple EGF-like-domains 8 [Source:ZFIN;Acc:ZDB-GENE-090730-1]	52	52	protein_coding	TRUE	TRUE
ENSDARG00000088123	ZNF217	0.273569	2.01636	0.182529	zinc finger protein 217 [Source:HGNC Symbol;Acc:HGNC:13009]	35	35	protein_coding	FALSE	FALSE
ENSDARG00000093532	si.dkey.230i18.2	0.273569	2.29831	0.669496	si:dkey-230i18.2 [Source:ZFIN;Acc:ZDB-GENE-070912-457]	0	0	protein_coding	FALSE	FALSE
ENSDARG00000101312	si.dkey.31n13.4	0.273569	1.5595	0	si:dkey-31n13.4 [Source:ZFIN;Acc:ZDB-GENE-071008-3]	0	0	protein_coding	FALSE	FALSE
ENSDARG00000104727	ino80da	0.273569	2.36785	0.769603	INO80 complex subunit Da [Source:ZFIN;Acc:ZDB-GENE-091204-416]	56	56	protein_coding	FALSE	FALSE
ENSDARG00000006370	atp6v1h	0.243173	2.65891	1.16416	ATPase, H+ transporting, lysosomal V1 subunit H [Source:ZFIN;Acc:ZDB-GENE-021219-2]	88	87	protein_coding	FALSE	FALSE
ENSDARG00000010978	trmt1	0.243173	2.39856	0.810339	tRNA methyltransferase 1 [Source:ZFIN;Acc:ZDB-GENE-060810-40]	57	57	protein_coding	FALSE	FALSE
ENSDARG00000015793	creb3l1	0.243173	1.51179	0	cAMP responsive element binding protein 3-like 1 [Source:ZFIN;Acc:ZDB-GENE-030219-181]	52	53	protein_coding	FALSE	FALSE
ENSDARG00000016128	ap3m2	0.243173	2.11515	0.36859	adaptor-related protein complex 3, mu 2 subunit [Source:ZFIN;Acc:ZDB-GENE-021022-2]	90	91	protein_coding	FALSE	FALSE
ENSDARG00000030297	sox13	0.243173	1.91308	0	SRY (sex determining region Y)-box 13 [Source:ZFIN;Acc:ZDB-GENE-100519-1]	51	52	protein_coding	FALSE	FALSE
ENSDARG00000037914	znfl1	0.243173	2.40346	0.815212	zinc finger-like gene 1 [Source:ZFIN;Acc:ZDB-GENE-030828-6]	0	0	protein_coding	FALSE	FALSE
ENSDARG00000039347	rps24	0.243173	1.59623	0	ribosomal protein S24 [Source:ZFIN;Acc:ZDB-GENE-040109-5]	89	89	protein_coding	FALSE	FALSE
ENSDARG00000039482	calhm2	0.243173	1.82479	0	calcium homeostasis modulator 2 [Source:ZFIN;Acc:ZDB-GENE-030616-561]	56	58	protein_coding	TRUE	FALSE
ENSDARG00000039880	arpp19b	0.243173	1.64685	0	cAMP-regulated phosphoprotein 19b [Source:ZFIN;Acc:ZDB-GENE-040426-930]	78	78	protein_coding	FALSE	FALSE
ENSDARG00000053344	adgrd1	0.243173	1.63345	0	adhesion G protein-coupled receptor D1 [Source:ZFIN;Acc:ZDB-GENE-041212-24]	72	73	protein_coding	TRUE	TRUE
ENSDARG00000056112	pikfyve	0.243173	2.05105	0.252172	phosphoinositide kinase, FYVE finger containing [Source:ZFIN;Acc:ZDB-GENE-030131-9636]	69	72	protein_coding	FALSE	FALSE
ENSDARG00000058537	si.dkey.102c8.2.2	0.243173	1.54793	0	si:dkey-102c8.2 [Source:ZFIN;Acc:ZDB-GENE-050208-329]	0	0	protein_coding	FALSE	TRUE
ENSDARG00000071671	nudt22	0.243173	1.93206	0.0222486	nudix (nucleoside diphosphate linked moiety X)-type motif 22 [Source:ZFIN;Acc:ZDB-GENE-041010-171]	45	45	protein_coding	FALSE	FALSE
ENSDARG00000078592	nomo	0.243173	1.50636	0	nodal modulator [Source:ZFIN;Acc:ZDB-GENE-040826-3]	69	70	protein_coding	FALSE	TRUE
ENSDARG00000093263	TRIM29..1.to.many..7	0.243173	1.70872	0	tripartite motif containing 29 [Source:HGNC Symbol;Acc:HGNC:17274]	0	0	protein_coding	FALSE	FALSE
ENSDARG00000099098	C1GALT1..1.to.many.	0.243173	1.51497	0	core 1 synthase, glycoprotein-N-acetylgalactosamine 3-beta-galactosyltransferase 1 [Source:HGNC Symbol;Acc:HGNC:24337]	49	49	protein_coding	TRUE	FALSE
ENSDARG00000099306	FBXO2	0.243173	1.84066	0	zgc:175088 [Source:ZFIN;Acc:ZDB-GENE-080204-124]	55	55	protein_coding	FALSE	FALSE
ENSDARG00000099318	CABZ01062422.1	0.243173	2.38661	0.794005		0	0	protein_coding	FALSE	FALSE
ENSDARG00000099375	poldip3	0.243173	2.40364	0.815212	polymerase (DNA-directed), delta interacting protein 3 [Source:ZFIN;Acc:ZDB-GENE-120201-2]	42	42	protein_coding	FALSE	FALSE
ENSDARG00000099381	si.dkey.27n6.1	0.243173	1.65733	0	si:dkey-27n6.1 [Source:ZFIN;Acc:ZDB-GENE-041014-40]	0	0	protein_coding	FALSE	FALSE
ENSDARG00000099660	xkr8.2.1	0.243173	2.88253	1.43741		0	0	unprocessed_pseudogene	NA	NA
ENSDARG00000103923	tfap4	0.243173	3.1514	1.74636	transcription factor AP-4 (activating enhancer binding protein 4) [Source:ZFIN;Acc:ZDB-GENE-090810-1]	76	77	protein_coding	FALSE	FALSE
ENSDARG00000010238	rbm22	0.212776	1.72256	0	RNA binding motif protein 22 [Source:ZFIN;Acc:ZDB-GENE-040426-2298]	85	85	protein_coding	FALSE	FALSE
ENSDARG00000019752	rom1a	0.212776	2.5592	1.03022	retinal outer segment membrane protein 1a [Source:ZFIN;Acc:ZDB-GENE-040426-1765]	35	33	protein_coding	TRUE	FALSE
ENSDARG00000029671	xpr1b	0.212776	2.48869	0.933983	xenotropic and polytropic retrovirus receptor 1b [Source:ZFIN;Acc:ZDB-GENE-060503-266]	80	80	protein_coding	TRUE	FALSE
ENSDARG00000032102	prdx3	0.212776	2.93432	1.49351	peroxiredoxin 3 [Source:ZFIN;Acc:ZDB-GENE-030826-18]	64	63	protein_coding	FALSE	FALSE
ENSDARG00000037057	gcdha	0.212776	1.80953	0	glutaryl-CoA dehydrogenase a [Source:ZFIN;Acc:ZDB-GENE-040426-1855]	71	72	protein_coding	FALSE	FALSE
ENSDARG00000037675	npm1b	0.212776	1.97337	0.104575	nucleophosmin 1b (nucleolar phosphoprotein B23, numatrin) [Source:ZFIN;Acc:ZDB-GENE-080723-7]	0	0	protein_coding	FALSE	FALSE
ENSDARG00000037783	proza	0.212776	1.85852	0	protein Z, vitamin K-dependent plasma glycoprotein a [Source:ZFIN;Acc:ZDB-GENE-061013-403]	31	32	protein_coding	TRUE	TRUE
ENSDARG00000038422	entpd4	0.212776	2.89904	1.45181	ectonucleoside triphosphate diphosphohydrolase 4 [Source:ZFIN;Acc:ZDB-GENE-040718-116]	71	71	protein_coding	TRUE	FALSE
ENSDARG00000057255	emc1	0.212776	1.93511	0.0267861	ER membrane protein complex subunit 1 [Source:ZFIN;Acc:ZDB-GENE-060810-98]	66	67	protein_coding	FALSE	TRUE
ENSDARG00000063030	mesdc2	0.212776	2.00283	0.157308	mesoderm development candidate 2 [Source:ZFIN;Acc:ZDB-GENE-070112-2142]	64	67	protein_coding	FALSE	FALSE
ENSDARG00000075383	gramd1ba	0.212776	2.41922	0.838503	GRAM domain containing 1Ba [Source:ZFIN;Acc:ZDB-GENE-091118-87]	73	73	protein_coding	TRUE	TRUE
ENSDARG00000092799	camta2	0.212776	2.88446	1.43877	calmodulin binding transcription activator 2 [Source:ZFIN;Acc:ZDB-GENE-090313-6]	78	78	protein_coding	FALSE	FALSE
ENSDARG00000097378	si.dkey.81l17.7	0.212776	1.91502	0	si:dkey-81l17.7 [Source:ZFIN;Acc:ZDB-GENE-131127-164]	0	0	antisense	NA	NA
ENSDARG00000098403	si.rp71.81e14.6	0.212776	2.98737	1.56413	si:rp71-81e14.6 [Source:ZFIN;Acc:ZDB-GENE-060503-378]	0	0	processed_transcript	NA	NA
ENSDARG00000098892	si.ch211.223a21.1	0.212776	2.36863	0.770037	si:ch211-223a21.1 [Source:ZFIN;Acc:ZDB-GENE-110913-137]	35	38	protein_coding	FALSE	FALSE
ENSDARG00000099272	BX942821.1	0.212776	1.62306	0		0	0	protein_coding	FALSE	FALSE
ENSDARG00000099403	znf1075	0.212776	2.97716	1.54996	zinc finger protein 1075 [Source:ZFIN;Acc:ZDB-GENE-120703-31]	0	0	protein_coding	FALSE	FALSE
ENSDARG00000101533	si.dkey.15h8.14	0.212776	2.78587	1.31849	si:dkey-15h8.14 [Source:ZFIN;Acc:ZDB-GENE-050208-547]	0	0	protein_coding	FALSE	FALSE
ENSDARG00000102936	znf1121	0.212776	1.88398	0	zinc finger protein 1121 [Source:ZFIN;Acc:ZDB-GENE-110914-9]	39	45	protein_coding	FALSE	FALSE
ENSDARG00000002264	mrpl41	0.18238	2.63467	1.13286	mitochondrial ribosomal protein L41 [Source:ZFIN;Acc:ZDB-GENE-050522-200]	64	61	protein_coding	FALSE	FALSE
ENSDARG00000005549	ZNF710..1.to.many.	0.18238	2.66361	1.1708	zinc finger protein 710 [Source:HGNC Symbol;Acc:HGNC:25352]	50	50	protein_coding	FALSE	FALSE
ENSDARG00000006584	phf8	0.18238	1.51368	0	PHD finger protein 8 [Source:ZFIN;Acc:ZDB-GENE-060419-1]	42	63	protein_coding	FALSE	FALSE
ENSDARG00000021140	pabpc1b	0.18238	2.87593	1.43132	poly A binding protein, cytoplasmic 1 b [Source:ZFIN;Acc:ZDB-GENE-050308-1]	75	25	protein_coding	FALSE	FALSE
ENSDARG00000022399	ntmt1	0.18238	2.81816	1.3624	N-terminal Xaa-Pro-Lys N-methyltransferase 1 [Source:ZFIN;Acc:ZDB-GENE-040426-2055]	72	72	protein_coding	FALSE	FALSE
ENSDARG00000027750	dpp7	0.18238	2.46085	0.89489	dipeptidyl-peptidase 7 [Source:ZFIN;Acc:ZDB-GENE-050306-16]	56	53	protein_coding	TRUE	TRUE
ENSDARG00000032114	slain2	0.18238	1.51594	0	SLAIN motif family, member 2 [Source:ZFIN;Acc:ZDB-GENE-041014-251]	0	0	protein_coding	FALSE	FALSE
ENSDARG00000053563	si.ch73.56d11.4	0.18238	1.77162	0	si:ch73-56d11.4 [Source:ZFIN;Acc:ZDB-GENE-131125-46]	25	19	protein_coding	TRUE	FALSE
ENSDARG00000057907	si.ch73.181d5.4	0.18238	1.73065	0	si:ch73-181d5.4 [Source:ZFIN;Acc:ZDB-GENE-100922-118]	24	24	protein_coding	FALSE	FALSE
ENSDARG00000060199	mrpl18	0.18238	2.64543	1.14596	mitochondrial ribosomal protein L18 [Source:ZFIN;Acc:ZDB-GENE-061013-632]	41	43	protein_coding	FALSE	FALSE
ENSDARG00000061802	cnot2	0.18238	2.03816	0.225458	CCR4-NOT transcription complex, subunit 2 [Source:ZFIN;Acc:ZDB-GENE-070410-70]	88	88	protein_coding	FALSE	FALSE
ENSDARG00000062973	ttll7	0.18238	2.31279	0.691171	tubulin tyrosine ligase-like family, member 7 [Source:ZFIN;Acc:ZDB-GENE-070112-2112]	63	65	protein_coding	FALSE	FALSE
ENSDARG00000069496	arl2	0.18238	2.67114	1.17956	ADP-ribosylation factor-like 2 [Source:ZFIN;Acc:ZDB-GENE-041010-19]	83	85	protein_coding	FALSE	FALSE
ENSDARG00000071576	si.dkey.102c8.3	0.18238	1.67089	0	si:dkey-102c8.3 [Source:ZFIN;Acc:ZDB-GENE-050208-328]	0	0	protein_coding	TRUE	TRUE
ENSDARG00000095695	ms4a17a.10	0.18238	2.44677	0.875103	membrane-spanning 4-domains, subfamily A, member 17A.10 [Source:ZFIN;Acc:ZDB-GENE-080829-3]	23	21	protein_coding	TRUE	FALSE
ENSDARG00000098080	gnl2	0.18238	2.69016	1.20209	guanine nucleotide binding protein-like 2 (nucleolar) [Source:ZFIN;Acc:ZDB-GENE-040426-2317]	66	67	protein_coding	FALSE	FALSE
ENSDARG00000099154	CABZ01032488.1	0.18238	2.76542	1.29603		81	80	protein_coding	FALSE	FALSE
ENSDARG00000100529	FO904928.1	0.18238	1.7646	0		0	0	protein_coding	FALSE	FALSE
ENSDARG00000103117	tmprss4a	0.18238	2.17796	0.481736	transmembrane protease, serine 4a [Source:ZFIN;Acc:ZDB-GENE-061103-631]	33	33	protein_coding	TRUE	FALSE
ENSDARG00000004806	grwd1	0.151983	2.64512	1.14596	glutamate-rich WD repeat containing 1 [Source:ZFIN;Acc:ZDB-GENE-030131-9844]	60	59	protein_coding	FALSE	FALSE
ENSDARG00000007760	spg21	0.151983	1.51754	0	spastic paraplegia 21 (autosomal recessive, Mast syndrome) [Source:ZFIN;Acc:ZDB-GENE-040426-2722]	87	87	protein_coding	FALSE	FALSE
ENSDARG00000013422	slc8a1a	0.151983	2.24309	0.585133	solute carrier family 8 (sodium/calcium exchanger), member 1a [Source:ZFIN;Acc:ZDB-GENE-050809-1]	75	76	protein_coding	TRUE	TRUE
ENSDARG00000013478	rrp15	0.151983	2.64415	1.14596	ribosomal RNA processing 15 homolog [Source:ZFIN;Acc:ZDB-GENE-030131-5261]	50	53	protein_coding	FALSE	FALSE
ENSDARG00000026862	aktip	0.151983	2.4369	0.864505	akt interacting protein [Source:ZFIN;Acc:ZDB-GENE-030909-5]	76	78	protein_coding	FALSE	FALSE
ENSDARG00000032458	mark2b	0.151983	2.39057	0.799043	MAP/microtubule affinity-regulating kinase 2b [Source:ZFIN;Acc:ZDB-GENE-080215-4]	71	72	protein_coding	FALSE	FALSE
ENSDARG00000035420	ophn1	0.151983	2.56116	1.03269	oligophrenin 1 [Source:ZFIN;Acc:ZDB-GENE-040718-464]	61	62	protein_coding	FALSE	FALSE
ENSDARG00000040452	fam214a	0.151983	1.78521	0	family with sequence similarity 214, member A [Source:ZFIN;Acc:ZDB-GENE-050419-204]	46	47	protein_coding	FALSE	FALSE
ENSDARG00000040725	zgc.114130	0.151983	2.47422	0.915447	zgc:114130 [Source:ZFIN;Acc:ZDB-GENE-050913-48]	0	0	protein_coding	FALSE	FALSE
ENSDARG00000041728	man1a2	0.151983	2.43949	0.867832	mannosidase, alpha, class 1A, member 2 [Source:ZFIN;Acc:ZDB-GENE-070912-390]	82	83	protein_coding	TRUE	FALSE
ENSDARG00000045304	mtfr1	0.151983	2.43212	0.858062	mitochondrial fission regulator 1 [Source:ZFIN;Acc:ZDB-GENE-041212-86]	42	46	protein_coding	FALSE	FALSE
ENSDARG00000060860	pstpip1a	0.151983	1.68483	0	proline-serine-threonine phosphatase interacting protein 1a [Source:ZFIN;Acc:ZDB-GENE-050419-251]	54	55	protein_coding	FALSE	FALSE
ENSDARG00000063438	srebf2	0.151983	1.72237	0	sterol regulatory element binding transcription factor 2 [Source:ZFIN;Acc:ZDB-GENE-070410-8]	50	51	protein_coding	FALSE	FALSE
ENSDARG00000063525	adpgk	0.151983	1.92761	0.0138632	ADP-dependent glucokinase [Source:ZFIN;Acc:ZDB-GENE-061103-421]	63	63	protein_coding	FALSE	TRUE
ENSDARG00000069159	rab38b	0.151983	2.22414	0.556934	RAB38b, member of RAS oncogene family [Source:ZFIN;Acc:ZDB-GENE-091204-345]	0	0	protein_coding	FALSE	FALSE
ENSDARG00000070589	mrpl35	0.151983	2.33401	0.723486	mitochondrial ribosomal protein L35 [Source:ZFIN;Acc:ZDB-GENE-060929-1082]	52	52	protein_coding	FALSE	FALSE
ENSDARG00000079553	cd83	0.151983	2.263	0.614405	CD83 molecule [Source:ZFIN;Acc:ZDB-GENE-060503-762]	0	0	protein_coding	TRUE	TRUE
ENSDARG00000087941	PDE8A	0.151983	1.96534	0.0874576	phosphodiesterase 8A [Source:HGNC Symbol;Acc:HGNC:8793]	58	62	protein_coding	FALSE	FALSE
ENSDARG00000094042	si.dkey.20i20.4	0.151983	1.82306	0	si:dkey-20i20.4 [Source:ZFIN;Acc:ZDB-GENE-060503-717]	0	0	protein_coding	FALSE	FALSE
ENSDARG00000098986	BX548067.1	0.151983	2.46627	0.903039		0	0	protein_coding	FALSE	FALSE
ENSDARG00000099653	psmd2	0.151983	2.25283	0.597902	proteasome 26S subunit, non-ATPase 2 [Source:ZFIN;Acc:ZDB-GENE-040426-1480]	95	95	protein_coding	FALSE	FALSE
ENSDARG00000102701	eva1ba	0.151983	2.3264	0.711547	eva-1 homolog Ba (C. elegans) [Source:ZFIN;Acc:ZDB-GENE-030131-8941]	56	56	protein_coding	TRUE	FALSE
ENSDARG00000103221	CR774192.1	0.151983	2.19076	0.5034		0	0	miRNA	NA	NA
ENSDARG00000103582	si.dkeyp.79b7.11	0.151983	1.64025	0	si:dkeyp-79b7.11 [Source:ZFIN;Acc:ZDB-GENE-050208-722]	0	0	protein_coding	FALSE	FALSE
ENSDARG00000104820	psd3l	0.151983	2.63361	1.13152	pleckstrin and Sec7 domain containing 3, like [Source:ZFIN;Acc:ZDB-GENE-030131-8195]	36	48	protein_coding	FALSE	FALSE
ENSDARG00000105208	TM6SF2..1.to.many.	0.151983	2.28543	0.64908	zgc:85843 [Source:ZFIN;Acc:ZDB-GENE-040426-2362]	42	43	protein_coding	TRUE	FALSE
ENSDARG00000005560	ywhah	0.121586	1.69457	0	tyrosine 3-monooxygenase/tryptophan 5-monooxygenase activation protein, eta polypeptide [Source:ZFIN;Acc:ZDB-GENE-040426-2191]	85	85	protein_coding	FALSE	FALSE
ENSDARG00000006617	napga	0.121586	2.07678	0.303108	N-ethylmaleimide-sensitive factor attachment protein, gamma a [Source:ZFIN;Acc:ZDB-GENE-050320-46]	74	73	protein_coding	FALSE	FALSE
ENSDARG00000010727	ttyh2l	0.121586	1.55132	0	tweety homolog 2, like [Source:ZFIN;Acc:ZDB-GENE-040426-2394]	63	61	protein_coding	TRUE	FALSE
ENSDARG00000012827	mettl3	0.121586	2.40078	0.812429	methyltransferase like 3 [Source:ZFIN;Acc:ZDB-GENE-030131-9498]	69	69	protein_coding	FALSE	FALSE
ENSDARG00000013174	nkd3.7	0.121586	1.66412	0	naked cuticle homolog 3 [Source:ZFIN;Acc:ZDB-GENE-060503-63]	40	40	protein_coding	FALSE	FALSE
ENSDARG00000015889	zc3h15	0.121586	2.44237	0.871145	zinc finger CCCH-type containing 15 [Source:ZFIN;Acc:ZDB-GENE-030131-6239]	76	76	protein_coding	FALSE	FALSE
ENSDARG00000016855	sf3b5	0.121586	1.92819	0.0148109	splicing factor 3b, subunit 5 [Source:ZFIN;Acc:ZDB-GENE-040718-181]	93	94	protein_coding	FALSE	FALSE
ENSDARG00000020771	tnr	0.121586	1.7352	0	tenascin R (restrictin, janusin) [Source:ZFIN;Acc:ZDB-GENE-030804-1]	62	62	protein_coding	FALSE	TRUE
ENSDARG00000021147	nipal3	0.121586	2.21838	0.548976	NIPA-like domain containing 3 [Source:ZFIN;Acc:ZDB-GENE-040718-379]	61	61	protein_coding	TRUE	FALSE
ENSDARG00000027353	zmym2	0.121586	1.85666	0	zinc finger, MYM-type 2 [Source:ZFIN;Acc:ZDB-GENE-030131-2408]	17	52	protein_coding	FALSE	FALSE
ENSDARG00000035776	n6amt1	0.121586	2.36001	0.759538	N-6 adenine-specific DNA methyltransferase 1 (putative) [Source:ZFIN;Acc:ZDB-GENE-040718-206]	61	60	protein_coding	FALSE	FALSE
ENSDARG00000038518	snap29	0.121586	1.91381	0	synaptosomal-associated protein 29 [Source:ZFIN;Acc:ZDB-GENE-041111-226]	48	50	protein_coding	FALSE	FALSE
ENSDARG00000043527	plpp6	0.121586	2.0696	0.289298	phospholipid phosphatase 6 [Source:ZFIN;Acc:ZDB-GENE-040724-247]	60	62	protein_coding	TRUE	FALSE
ENSDARG00000044923	ube2w	0.121586	1.90767	0	ubiquitin-conjugating enzyme E2W (putative) [Source:ZFIN;Acc:ZDB-GENE-050506-94]	93	93	protein_coding	FALSE	FALSE
ENSDARG00000055481	atf7b	0.121586	1.50724	0	activating transcription factor 7b [Source:ZFIN;Acc:ZDB-GENE-030131-3028]	55	60	protein_coding	FALSE	FALSE
ENSDARG00000057648	dnttip2	0.121586	1.85886	0	deoxynucleotidyltransferase, terminal, interacting protein 2 [Source:ZFIN;Acc:ZDB-GENE-080513-5]	24	24	protein_coding	FALSE	FALSE
ENSDARG00000069594	kif13a	0.121586	1.7902	0	kinesin family member 13A [Source:ZFIN;Acc:ZDB-GENE-090901-1]	62	63	protein_coding	FALSE	FALSE
ENSDARG00000075151	si.dkey.188i13.10	0.121586	1.63397	0	si:dkey-188i13.10 [Source:ZFIN;Acc:ZDB-GENE-090313-208]	45	47	protein_coding	TRUE	FALSE
ENSDARG00000075974	si.dkey.258f14.3	0.121586	1.98325	0.125811	si:dkey-258f14.3 [Source:ZFIN;Acc:ZDB-GENE-050809-43]	0	0	protein_coding	TRUE	TRUE
ENSDARG00000079350	znf654	0.121586	2.15238	0.442375	zinc finger protein 654 [Source:ZFIN;Acc:ZDB-GENE-030131-1423]	8	8	protein_coding	FALSE	FALSE
ENSDARG00000080533	SNORA21	0.121586	1.76101	0	Small nucleolar RNA SNORA21 [Source:RFAM;Acc:RF00412]	34	61	snoRNA	NA	NA
ENSDARG00000086057	PLXND1	0.121586	1.99688	0.149401	plexin D1 [Source:HGNC Symbol;Acc:HGNC:9107]	43	43	protein_coding	TRUE	TRUE
ENSDARG00000088549	si.ch1073.390k14.1	0.121586	1.94007	0.0344997	si:ch1073-390k14.1 [Source:ZFIN;Acc:ZDB-GENE-141215-14]	0	0	protein_coding	FALSE	FALSE
ENSDARG00000089094	B3GNT8..1.to.many.	0.121586	1.65764	0	si:dkey-160o24.3 [Source:ZFIN;Acc:ZDB-GENE-140106-224]	0	0	protein_coding	TRUE	FALSE
ENSDARG00000089146	si.dkey.53k12.5	0.121586	1.80045	0	si:dkey-53k12.5 [Source:ZFIN;Acc:ZDB-GENE-140106-226]	0	0	protein_coding	TRUE	TRUE
ENSDARG00000091831	ddx27	0.121586	2.40527	0.817211	DEAD (Asp-Glu-Ala-Asp) box polypeptide 27 [Source:ZFIN;Acc:ZDB-GENE-031001-8]	71	73	protein_coding	FALSE	FALSE
ENSDARG00000095032	ftr33	0.121586	1.85442	0	finTRIM family, member 33 [Source:ZFIN;Acc:ZDB-GENE-070912-109]	0	0	protein_coding	FALSE	FALSE
ENSDARG00000095667	si.dkey.4c15.19	0.121586	1.59667	0	si:dkey-4c15.19 [Source:ZFIN;Acc:ZDB-GENE-050420-13]	0	0	protein_coding	FALSE	FALSE
ENSDARG00000097097	myo18ab.3	0.121586	2.19216	0.505339		0	0	sense_intronic	NA	NA
ENSDARG00000097856	si.ch211.195c22.3	0.121586	2.00383	0.157722	si:ch211-195c22.3 [Source:ZFIN;Acc:ZDB-GENE-131203-1]	0	0	antisense	NA	NA
ENSDARG00000098628	si.dkey.9i5.1	0.121586	2.33104	0.718371	si:dkey-9i5.1 [Source:ZFIN;Acc:ZDB-GENE-110914-220]	0	0	lincRNA	NA	NA
ENSDARG00000100968	si.ch211.1a19.3	0.121586	2.45989	0.894183	si:ch211-1a19.3 [Source:ZFIN;Acc:ZDB-GENE-141216-322]	0	0	protein_coding	TRUE	FALSE
ENSDARG00000101223	si.ch211.229l10.11	0.121586	1.68068	0	si:ch211-229l10.11 [Source:ZFIN;Acc:ZDB-GENE-110913-131]	31	36	protein_coding	FALSE	FALSE
ENSDARG00000102009	ppp2r2d	0.121586	2.25895	0.608472	protein phosphatase 2, regulatory subunit B, delta [Source:ZFIN;Acc:ZDB-GENE-040426-2086]	94	95	protein_coding	FALSE	FALSE
ENSDARG00000104042	b4galt4	0.121586	1.87579	0	UDP-Gal:betaGlcNAc beta 1,4- galactosyltransferase, polypeptide 4 [Source:ZFIN;Acc:ZDB-GENE-041114-103]	55	56	protein_coding	TRUE	FALSE
ENSDARG00000104065	si.dkey.1b17.11	0.121586	1.96134	0.0792297	si:dkey-1b17.11 [Source:ZFIN;Acc:ZDB-GENE-050208-786]	0	0	protein_coding	FALSE	FALSE
ENSDARG00000004658	ACTR2..1.to.many.	0.0911898	1.99066	0.138535	zgc:101810 [Source:ZFIN;Acc:ZDB-GENE-041121-7]	0	27	protein_coding	FALSE	FALSE
ENSDARG00000006719	specc1la	0.0911898	2.03186	0.211341	sperm antigen with calponin homology and coiled-coil domains 1-like a [Source:ZFIN;Acc:ZDB-GENE-060810-139]	0	0	protein_coding	FALSE	FALSE
ENSDARG00000007678	ttyh3b	0.0911898	1.71358	0	tweety family member 3b [Source:ZFIN;Acc:ZDB-GENE-051120-105]	65	65	protein_coding	TRUE	FALSE
ENSDARG00000009862	dcps	0.0911898	2.06669	0.284093	decapping enzyme, scavenger [Source:ZFIN;Acc:ZDB-GENE-040311-1]	55	55	protein_coding	FALSE	FALSE
ENSDARG00000011885	mrpl19	0.0911898	2.18465	0.493311	mitochondrial ribosomal protein L19 [Source:ZFIN;Acc:ZDB-GENE-040801-55]	60	62	protein_coding	FALSE	FALSE
ENSDARG00000012829	asah2	0.0911898	1.57096	0	N-acylsphingosine amidohydrolase 2 [Source:ZFIN;Acc:ZDB-GENE-041112-1]	57	10	protein_coding	TRUE	FALSE
ENSDARG00000013022	si.ch211.59h6.1	0.0911898	1.98391	0.12693	si:ch211-59h6.1 [Source:ZFIN;Acc:ZDB-GENE-091204-418]	0	0	protein_coding	FALSE	FALSE
ENSDARG00000014139	srp72	0.0911898	2.0852	0.317904	signal recognition particle 72 [Source:ZFIN;Acc:ZDB-GENE-030131-5546]	75	76	protein_coding	FALSE	FALSE
ENSDARG00000016399	riok1	0.0911898	1.89165	0	RIO kinase 1 (yeast) [Source:ZFIN;Acc:ZDB-GENE-040426-1927]	67	70	protein_coding	FALSE	FALSE
ENSDARG00000016763	znf292a	0.0911898	1.95988	0.0765804	zinc finger protein 292a [Source:ZFIN;Acc:ZDB-GENE-071004-18]	32	33	protein_coding	FALSE	FALSE
ENSDARG00000022905	si.dkey.20i20.12	0.0911898	1.67281	0	si:dkey-20i20.12 [Source:ZFIN;Acc:ZDB-GENE-060503-151]	0	0	protein_coding	FALSE	FALSE
ENSDARG00000026875	fam57ba	0.0911898	1.76665	0	family with sequence similarity 57, member Ba [Source:ZFIN;Acc:ZDB-GENE-030131-2046]	60	61	protein_coding	TRUE	FALSE
ENSDARG00000033987	rsrc1	0.0911898	1.8756	0	arginine/serine-rich coiled-coil 1 [Source:ZFIN;Acc:ZDB-GENE-040426-2374]	53	54	protein_coding	FALSE	FALSE
ENSDARG00000045561	dram1	0.0911898	1.89717	0	DNA-damage regulated autophagy modulator 1 [Source:ZFIN;Acc:ZDB-GENE-041010-147]	48	47	protein_coding	TRUE	FALSE
ENSDARG00000045910	tmem181	0.0911898	1.93633	0.0279707	transmembrane protein 181 [Source:ZFIN;Acc:ZDB-GENE-060503-309]	63	68	protein_coding	TRUE	FALSE
ENSDARG00000055445	slc22a15	0.0911898	1.80616	0	solute carrier family 22, member 15 [Source:ZFIN;Acc:ZDB-GENE-070928-5]	48	48	protein_coding	TRUE	FALSE
ENSDARG00000055470	cdc16	0.0911898	2.31334	0.691702	cell division cycle 16 homolog (S. cerevisiae) [Source:ZFIN;Acc:ZDB-GENE-051113-132]	79	80	protein_coding	FALSE	FALSE
ENSDARG00000055648	cpda	0.0911898	2.07943	0.308336	carboxypeptidase D, a [Source:ZFIN;Acc:ZDB-GENE-081112-2]	60	61	protein_coding	TRUE	TRUE
ENSDARG00000062971	sdhaf2	0.0911898	1.72806	0	succinate dehydrogenase complex assembly factor 2 [Source:ZFIN;Acc:ZDB-GENE-030131-7564]	58	56	protein_coding	FALSE	FALSE
ENSDARG00000068305	mrps14	0.0911898	1.87184	0	mitochondrial ribosomal protein S14 [Source:ZFIN;Acc:ZDB-GENE-060825-75]	67	66	protein_coding	FALSE	FALSE
ENSDARG00000069044	agpat4	0.0911898	1.79892	0	1-acylglycerol-3-phosphate O-acyltransferase 4 (lysophosphatidic acid acyltransferase, delta) [Source:ZFIN;Acc:ZDB-GENE-040426-1924]	66	67	protein_coding	TRUE	FALSE
ENSDARG00000074471	vps39	0.0911898	2.00281	0.157308	vacuolar protein sorting 39 homolog (S. cerevisiae) [Source:ZFIN;Acc:ZDB-GENE-080530-2]	83	83	protein_coding	FALSE	FALSE
ENSDARG00000075226	SMAD4..1.to.many.	0.0911898	1.98851	0.135868	zmp:0000000768 [Source:ZFIN;Acc:ZDB-GENE-130530-771]	88	89	protein_coding	FALSE	FALSE
ENSDARG00000077431	usf3	0.0911898	1.94209	0.0387891	upstream transcription factor family member 3 [Source:ZFIN;Acc:ZDB-GENE-111109-1]	32	32	protein_coding	FALSE	FALSE
ENSDARG00000078935	ttll4	0.0911898	1.57211	0	tubulin tyrosine ligase-like family, member 4 [Source:ZFIN;Acc:ZDB-GENE-070912-313]	44	45	protein_coding	FALSE	FALSE
ENSDARG00000081808	FO904878.1	0.0911898	1.86445	0		0	0	miRNA	NA	NA
ENSDARG00000085406	X5S_rRNA.49	0.0911898	1.69574	0	5S ribosomal RNA [Source:RFAM;Acc:RF00001]	0	0	rRNA	NA	NA
ENSDARG00000086217	zgc.152830.2	0.0911898	1.80619	0		0	0	protein_coding	FALSE	FALSE
ENSDARG00000087227	oit3	0.0911898	1.57697	0	oncoprotein induced transcript 3 [Source:ZFIN;Acc:ZDB-GENE-130530-907]	59	58	protein_coding	FALSE	FALSE
ENSDARG00000087543	si.dkey.108k21.12	0.0911898	1.80377	0	si:dkey-108k21.12 [Source:ZFIN;Acc:ZDB-GENE-131127-139]	99	0	protein_coding	FALSE	FALSE
ENSDARG00000089986	TP53INP2	0.0911898	1.71865	0	tumor protein p53 inducible nuclear protein 2 [Source:HGNC Symbol;Acc:HGNC:16104]	32	35	protein_coding	FALSE	FALSE
ENSDARG00000092000	znf1020	0.0911898	2.01236	0.1759	zinc finger protein 1020 [Source:ZFIN;Acc:ZDB-GENE-110913-31]	0	0	protein_coding	FALSE	FALSE
ENSDARG00000092257	si.dkeyp.93h6.3	0.0911898	1.71202	0	si:dkeyp-93h6.3 [Source:ZFIN;Acc:ZDB-GENE-040724-197]	0	0	antisense	NA	NA
ENSDARG00000093647	si.dkey.48g21.7	0.0911898	1.67778	0	si:dkey-48g21.7 [Source:ZFIN;Acc:ZDB-GENE-050309-95]	0	0	lincRNA	NA	NA
ENSDARG00000096417	si.dkey.11f14.2	0.0911898	1.82562	0	si:dkey-11f14.2 [Source:ZFIN;Acc:ZDB-GENE-120215-138]	0	0	antisense	NA	NA
ENSDARG00000097519	si.ch211.241e1.6	0.0911898	1.65702	0	si:ch211-241e1.6 [Source:ZFIN;Acc:ZDB-GENE-131127-67]	0	0	lincRNA	NA	NA
ENSDARG00000097753	slirp	0.0911898	1.91491	0	SRA stem-loop interacting RNA binding protein [Source:ZFIN;Acc:ZDB-GENE-030729-30]	47	47	protein_coding	FALSE	FALSE
ENSDARG00000099743	zgc.113019	0.0911898	2.19741	0.511114	zgc:113019 [Source:ZFIN;Acc:ZDB-GENE-050417-449]	0	0	protein_coding	FALSE	FALSE
ENSDARG00000100234	BX511246.1	0.0911898	1.59257	0		0	0	protein_coding	FALSE	FALSE
ENSDARG00000101024	nufip1	0.0911898	1.91631	0	nuclear fragile X mental retardation protein interacting protein 1 [Source:ZFIN;Acc:ZDB-GENE-030131-6203]	42	42	protein_coding	FALSE	FALSE
ENSDARG00000101055	trim35.25	0.0911898	1.65002	0	tripartite motif containing 35-25 [Source:ZFIN;Acc:ZDB-GENE-060503-484]	33	34	protein_coding	FALSE	FALSE
ENSDARG00000101938	CABZ01060492.1	0.0911898	2.28031	0.640647		0	0	protein_coding	FALSE	FALSE
ENSDARG00000102488	si.ch73.200d4.2	0.0911898	1.61795	0	si:ch73-200d4.2 [Source:ZFIN;Acc:ZDB-GENE-141216-165]	0	0	lincRNA	NA	NA
ENSDARG00000102793	slc16a6a	0.0911898	1.8166	0	solute carrier family 16, member 6a [Source:ZFIN;Acc:ZDB-GENE-110208-1]	55	54	protein_coding	TRUE	FALSE
ENSDARG00000103136	si.dkey.119o24.8	0.0911898	1.96166	0.0794317	si:dkey-119o24.8 [Source:ZFIN;Acc:ZDB-GENE-131120-156]	0	0	antisense	NA	NA
ENSDARG00000103552	si.ch211.106g8.19	0.0911898	1.6613	0	si:ch211-106g8.19 [Source:ZFIN;Acc:ZDB-GENE-141212-41]	0	0	TR_V_gene	FALSE	TRUE
ENSDARG00000103563	IFT122	0.0911898	1.96739	0.0916995	intraflagellar transport 122 [Source:HGNC Symbol;Acc:HGNC:13556]	54	54	protein_coding	FALSE	FALSE
ENSDARG00000103827	znf1144	0.0911898	1.59511	0	zinc finger protein 1144 [Source:ZFIN;Acc:ZDB-GENE-050420-78]	48	46	protein_coding	FALSE	FALSE
ENSDARG00000104108	slco1d1	0.0911898	1.81138	0	solute carrier organic anion transporter family, member 1D1 [Source:ZFIN;Acc:ZDB-GENE-030131-5044]	41	42	protein_coding	TRUE	FALSE
ENSDARG00000104963	si.rp71.84b10.3	0.0911898	1.57399	0	si:rp71-84b10.3 [Source:ZFIN;Acc:ZDB-GENE-141216-80]	0	0	lincRNA	NA	NA
ENSDARG00000000853	dstyk	0.0607932	1.81512	0	dual serine/threonine and tyrosine protein kinase [Source:ZFIN;Acc:ZDB-GENE-040826-2]	68	70	protein_coding	FALSE	FALSE
ENSDARG00000007179	sash1a	0.0607932	1.72536	0	SAM and SH3 domain containing 1a [Source:ZFIN;Acc:ZDB-GENE-030131-9960]	58	59	protein_coding	FALSE	FALSE
ENSDARG00000019774	zhx3	0.0607932	1.84489	0	zinc fingers and homeoboxes 3 [Source:ZFIN;Acc:ZDB-GENE-031107-1]	33	33	protein_coding	FALSE	FALSE
ENSDARG00000021433	asmtl	0.0607932	1.84858	0	acetylserotonin O-methyltransferase-like [Source:ZFIN;Acc:ZDB-GENE-030131-2854]	0	52	protein_coding	FALSE	FALSE
ENSDARG00000031434	rcor1	0.0607932	1.76437	0	REST corepressor 1 [Source:ZFIN;Acc:ZDB-GENE-050506-79]	59	65	protein_coding	FALSE	FALSE
ENSDARG00000039871	rpz4	0.0607932	1.68591	0	rapunzel 4 [Source:ZFIN;Acc:ZDB-GENE-050417-472]	0	0	protein_coding	FALSE	FALSE
ENSDARG00000041022	pdcd4b	0.0607932	1.55278	0	programmed cell death 4b [Source:ZFIN;Acc:ZDB-GENE-030131-9847]	70	70	protein_coding	FALSE	FALSE
ENSDARG00000052654	thrab	0.0607932	1.57263	0	thyroid hormone receptor alpha b [Source:ZFIN;Acc:ZDB-GENE-060613-1]	81	79	protein_coding	FALSE	FALSE
ENSDARG00000059349	CABZ01090374.1	0.0607932	1.5098	0		0	0	protein_coding	FALSE	FALSE
ENSDARG00000061004	cox11	0.0607932	1.71915	0	cytochrome c oxidase assembly homolog 11 (yeast) [Source:ZFIN;Acc:ZDB-GENE-050506-82]	63	62	protein_coding	TRUE	FALSE
ENSDARG00000062302	znf652	0.0607932	1.66088	0	zinc finger protein 652 [Source:ZFIN;Acc:ZDB-GENE-030131-5857]	55	55	protein_coding	FALSE	FALSE
ENSDARG00000062797	nell2b	0.0607932	1.56754	0	neural EGFL like 2b [Source:ZFIN;Acc:ZDB-GENE-030131-8026]	66	66	protein_coding	FALSE	TRUE
ENSDARG00000063354	abtb1	0.0607932	1.71553	0	ankyrin repeat and BTB (POZ) domain containing 1 [Source:ZFIN;Acc:ZDB-GENE-141212-241]	70	70	protein_coding	FALSE	FALSE
ENSDARG00000069953	kcnq5b	0.0607932	1.82777	0	potassium voltage-gated channel, KQT-like subfamily, member 5b [Source:ZFIN;Acc:ZDB-GENE-090312-178]	59	59	protein_coding	TRUE	FALSE
ENSDARG00000071051	cbx6a	0.0607932	1.64672	0	chromobox homolog 6a [Source:ZFIN;Acc:ZDB-GENE-040808-26]	34	34	protein_coding	FALSE	FALSE
ENSDARG00000074548	zbtb17	0.0607932	1.71725	0	zinc finger and BTB domain containing 17 [Source:ZFIN;Acc:ZDB-GENE-090313-240]	62	63	protein_coding	FALSE	FALSE
ENSDARG00000076363	CABZ01077228.1	0.0607932	1.56021	0		0	0	protein_coding	TRUE	FALSE
ENSDARG00000078835	ict1	0.0607932	1.64981	0	immature colon carcinoma transcript 1 [Source:ZFIN;Acc:ZDB-GENE-121214-202]	41	42	protein_coding	FALSE	TRUE
ENSDARG00000087048	si.dkey.165n16.1	0.0607932	1.51098	0	si:dkey-165n16.1 [Source:ZFIN;Acc:ZDB-GENE-100922-224]	37	0	protein_coding	FALSE	FALSE
ENSDARG00000087732	Metazoa_SRP.46	0.0607932	1.66745	0	Metazoan signal recognition particle RNA [Source:RFAM;Acc:RF00017]	0	73	misc_RNA	NA	NA
ENSDARG00000089853	ATP5J..1.to.many..9	0.0607932	1.58867	0	si:dkey-22n8.3 [Source:ZFIN;Acc:ZDB-GENE-110914-188]	11	10	protein_coding	FALSE	FALSE
ENSDARG00000090949	dlg5b.1	0.0607932	1.57916	0	discs, large homolog 5b (Drosophila), tandem duplicate 1 [Source:ZFIN;Acc:ZDB-GENE-120206-4]	54	55	protein_coding	FALSE	FALSE
ENSDARG00000092228	si.dkey.27p18.3	0.0607932	1.66691	0	si:dkey-27p18.3 [Source:ZFIN;Acc:ZDB-GENE-060526-287]	0	0	protein_coding	FALSE	FALSE
ENSDARG00000093126	si.ch73.112l6.1	0.0607932	1.74617	0	si:ch73-112l6.1 [Source:ZFIN;Acc:ZDB-GENE-091204-14]	0	0	protein_coding	FALSE	FALSE
ENSDARG00000093487	si.dkey.217f16.2	0.0607932	2.00476	0.159503	si:dkey-217f16.2 [Source:ZFIN;Acc:ZDB-GENE-091118-55]	0	0	sense_intronic	NA	NA
ENSDARG00000095080	si.ch211.245b21.1	0.0607932	1.67091	0	si:ch211-245b21.1 [Source:ZFIN;Acc:ZDB-GENE-141222-11]	0	0	processed_transcript	NA	NA
ENSDARG00000095856	si.dkeyp.52c3.6	0.0607932	1.99267	0.141144	si:dkeyp-52c3.6 [Source:ZFIN;Acc:ZDB-GENE-110411-50]	0	0	processed_transcript	NA	NA
ENSDARG00000097047	chmp4ba.1	0.0607932	1.63912	0		0	0	antisense	NA	NA
ENSDARG00000097549	si.ch211.158e19.2	0.0607932	1.61969	0	si:ch211-158e19.2 [Source:ZFIN;Acc:ZDB-GENE-131127-610]	0	0	lincRNA	NA	NA
ENSDARG00000098110	CABZ01079550.1	0.0607932	1.70777	0		0	0	protein_coding	FALSE	FALSE
ENSDARG00000099201	BX908731.1	0.0607932	1.5922	0		0	0	protein_coding	FALSE	FALSE
ENSDARG00000102585	fam160a1b	0.0607932	1.63824	0	family with sequence similarity 160, member A1b [Source:ZFIN;Acc:ZDB-GENE-110411-10]	0	0	protein_coding	FALSE	FALSE
ENSDARG00000103855	CABZ01016079.1	0.0607932	1.73837	0		0	0	miRNA	NA	NA
ENSDARG00000104446	si.ch211.218k8.1	0.0607932	1.50081	0	si:ch211-218k8.1 [Source:ZFIN;Acc:ZDB-GENE-141215-9]	0	0	protein_coding	FALSE	FALSE
ENSDARG00000104904	si.ch73.221f6.1	0.0607932	1.51899	0	si:ch73-221f6.1 [Source:ZFIN;Acc:ZDB-GENE-121214-41]	0	0	protein_coding	FALSE	FALSE
ENSDARG00000003084	spire2	0.0303966	1.61	0	spire-type actin nucleation factor 2 [Source:ZFIN;Acc:ZDB-GENE-041114-29]	54	53	protein_coding	FALSE	FALSE
ENSDARG00000014775	zgc.113220	0.0303966	1.57125	0	zgc:113220 [Source:ZFIN;Acc:ZDB-GENE-050320-64]	36	37	protein_coding	FALSE	FALSE
ENSDARG00000018984	eya2	0.0303966	1.54735	0	EYA transcriptional coactivator and phosphatase 2 [Source:ZFIN;Acc:ZDB-GENE-040912-24]	66	67	protein_coding	FALSE	FALSE
ENSDARG00000019596	nrd1a	0.0303966	1.71511	0	nardilysin a (N-arginine dibasic convertase) [Source:ZFIN;Acc:ZDB-GENE-070912-417]	71	70	protein_coding	FALSE	FALSE
ENSDARG00000022978	tmpob	0.0303966	1.55891	0	thymopoietin b [Source:ZFIN;Acc:ZDB-GENE-050522-8]	29	30	protein_coding	TRUE	FALSE
ENSDARG00000028546	ndufs1	0.0303966	1.71004	0	NADH dehydrogenase (ubiquinone) Fe-S protein 1 [Source:ZFIN;Acc:ZDB-GENE-030131-478]	79	80	protein_coding	FALSE	FALSE
ENSDARG00000060081	crb2b	0.0303966	1.5274	0	crumbs family member 2b [Source:ZFIN;Acc:ZDB-GENE-060610-1]	34	35	protein_coding	TRUE	TRUE
ENSDARG00000063249	mrpl9	0.0303966	1.62156	0	mitochondrial ribosomal protein L9 [Source:ZFIN;Acc:ZDB-GENE-070717-4]	48	49	protein_coding	FALSE	FALSE
ENSDARG00000063690	nrm	0.0303966	1.59873	0	nurim (nuclear envelope membrane protein [Source:ZFIN;Acc:ZDB-GENE-060503-445]	47	48	protein_coding	TRUE	FALSE
ENSDARG00000077300	usp42	0.0303966	1.54824	0	ubiquitin specific peptidase 42 [Source:ZFIN;Acc:ZDB-GENE-030131-5739]	38	38	protein_coding	FALSE	FALSE
ENSDARG00000081050	SNORA21.1	0.0303966	1.62308	0	Small nucleolar RNA SNORA21 [Source:RFAM;Acc:RF00412]	0	0	snoRNA	NA	NA
ENSDARG00000088022	mhc1zfa	0.0303966	1.58793	0	major histocompatibility complex class I ZFA [Source:ZFIN;Acc:ZDB-GENE-130206-9]	0	0	protein_coding	TRUE	TRUE
ENSDARG00000088689	si.ch211.201o1.1	0.0303966	1.52595	0	si:ch211-201o1.1 [Source:ZFIN;Acc:ZDB-GENE-120709-60]	0	0	protein_coding	FALSE	FALSE
ENSDARG00000091970	ms4a17a.3	0.0303966	1.93203	0.0222486	membrane-spanning 4-domains, subfamily A, member 17A.3 [Source:ZFIN;Acc:ZDB-GENE-080829-1]	23	19	protein_coding	TRUE	FALSE
ENSDARG00000092653	si.dkey.1h24.6	0.0303966	1.50728	0	si:dkey-1h24.6 [Source:ZFIN;Acc:ZDB-GENE-100922-103]	0	0	protein_coding	TRUE	TRUE
ENSDARG00000094530	si.dkey.109j17.4	0.0303966	1.54053	0	si:dkey-109j17.4 [Source:ZFIN;Acc:ZDB-GENE-090311-11]	0	0	processed_transcript	NA	NA
ENSDARG00000097381	si.dkey.23p11.4	0.0303966	1.55608	0	si:dkey-23p11.4 [Source:ZFIN;Acc:ZDB-GENE-131120-32]	0	0	processed_transcript	NA	NA
ENSDARG00000097957	si.ch73.239g21.2	0.0303966	1.78768	0	si:ch73-239g21.2 [Source:ZFIN;Acc:ZDB-GENE-131118-27]	0	0	processed_transcript	NA	NA
ENSDARG00000099587	si.ch211.96i7.6	0.0303966	1.58741	0	si:ch211-96i7.6 [Source:ZFIN;Acc:ZDB-GENE-141212-26]	0	0	protein_coding	FALSE	TRUE
ENSDARG00000101502	CR753816.1	0.0303966	1.61096	0		0	0	protein_coding	FALSE	FALSE
ENSDARG00000101507	ATG2A	0.0303966	1.62316	0	si:ch73-45o6.2 [Source:ZFIN;Acc:ZDB-GENE-091204-142]	52	54	protein_coding	FALSE	FALSE
ENSDARG00000101600	si.dkey.15h8.8	0.0303966	1.69912	0	si:dkey-15h8.8 [Source:ZFIN;Acc:ZDB-GENE-050208-465]	0	0	processed_transcript	NA	NA
ENSDARG00000102401	znf1001	0.0303966	1.579	0	zinc finger protein 1001 [Source:ZFIN;Acc:ZDB-GENE-080213-7]	0	0	protein_coding	FALSE	FALSE
ENSDARG00000102951	si.dkey.193i10.4	0.0303966	1.60145	0	si:dkey-193i10.4 [Source:ZFIN;Acc:ZDB-GENE-070705-343]	0	0	protein_coding	FALSE	FALSE
ENSDARG00000054804	anp32e	7.87272	1.22158	0	acidic (leucine-rich) nuclear phosphoprotein 32 family, member E [Source:ZFIN;Acc:ZDB-GENE-040426-2448]	70	71	protein_coding	FALSE	FALSE
ENSDARG00000062349	arhgap15	7.87272	1.39693	0	Rho GTPase activating protein 15 [Source:ZFIN;Acc:ZDB-GENE-070912-314]	56	58	protein_coding	FALSE	FALSE
ENSDARG00000026680	slc25a14	7.84232	1.29754	0	solute carrier family 25 (mitochondrial carrier, brain), member 14 [Source:ZFIN;Acc:ZDB-GENE-040426-749]	79	79	protein_coding	FALSE	FALSE
ENSDARG00000021405	chd3	7.62955	1.2446	0	chromodomain helicase DNA binding protein 3 [Source:ZFIN;Acc:ZDB-GENE-121031-4]	73	73	protein_coding	FALSE	FALSE
ENSDARG00000022315	atp6v1g1	7.62955	1.45303	0	ATPase, H+ transporting, lysosomal, V1 subunit G1 [Source:ZFIN;Acc:ZDB-GENE-030131-6965]	78	77	protein_coding	FALSE	FALSE
ENSDARG00000027734	srsf5b	7.62955	1.11019	0	serine/arginine-rich splicing factor 5b [Source:ZFIN;Acc:ZDB-GENE-040718-354]	72	72	protein_coding	FALSE	FALSE
ENSDARG00000005220	pdcd6	7.59915	1.03077	0	programmed cell death 6 [Source:ZFIN;Acc:ZDB-GENE-040426-1307]	83	83	protein_coding	FALSE	FALSE
ENSDARG00000036066	si.dkey.78a14.4	7.53836	1.45855	0	si:dkey-78a14.4 [Source:ZFIN;Acc:ZDB-GENE-110408-8]	42	44	protein_coding	FALSE	FALSE
ENSDARG00000099184	map2k6	7.50796	1.41741	0	mitogen-activated protein kinase kinase 6 [Source:ZFIN;Acc:ZDB-GENE-010202-3]	79	80	protein_coding	FALSE	FALSE
ENSDARG00000013360	sh3gl3a	7.44717	0.807334	0	SH3-domain GRB2-like 3a [Source:ZFIN;Acc:ZDB-GENE-070112-242]	74	74	protein_coding	FALSE	FALSE
ENSDARG00000041363	dctn3	7.44717	1.39884	0	dynactin 3 (p22) [Source:ZFIN;Acc:ZDB-GENE-040704-65]	53	55	protein_coding	FALSE	FALSE
ENSDARG00000093214	si.ch211.284e13.9	7.41677	1.45544	0	si:ch211-284e13.9 [Source:ZFIN;Acc:ZDB-GENE-060526-164]	0	0	protein_coding	FALSE	FALSE
ENSDARG00000040608	gcnt7	7.38637	0.915626	0	glucosaminyl (N-acetyl) transferase family member 7 [Source:ZFIN;Acc:ZDB-GENE-120919-3]	42	48	protein_coding	TRUE	FALSE
ENSDARG00000057782	baz2ba	7.38637	1.49198	0	bromodomain adjacent to zinc finger domain, 2Ba [Source:ZFIN;Acc:ZDB-GENE-070615-37]	47	50	protein_coding	FALSE	FALSE
ENSDARG00000098591	tubb2b	7.38637	1.34317	0	tubulin, beta 2b [Source:ZFIN;Acc:ZDB-GENE-030131-722]	0	53	protein_coding	FALSE	FALSE
ENSDARG00000104030	taf12	7.38637	1.1537	0	TAF12 RNA polymerase II, TATA box binding protein (TBP)-associated factor [Source:ZFIN;Acc:ZDB-GENE-031030-5]	81	80	protein_coding	FALSE	FALSE
ENSDARG00000011510	rcc2	7.35598	0.834338	0	regulator of chromosome condensation 2 [Source:ZFIN;Acc:ZDB-GENE-040426-2213]	81	82	protein_coding	FALSE	FALSE
ENSDARG00000035577	cds2	7.35598	1.19666	0	CDP-diacylglycerol synthase (phosphatidate cytidylyltransferase) 2 [Source:ZFIN;Acc:ZDB-GENE-030717-4]	82	82	protein_coding	TRUE	FALSE
ENSDARG00000062330	si.ch211.233a24.2	7.35598	1.02489	0	si:ch211-233a24.2 [Source:ZFIN;Acc:ZDB-GENE-090313-98]	74	74	protein_coding	TRUE	FALSE
ENSDARG00000059128	uqcrh	7.32558	1.37347	0	ubiquinol-cytochrome c reductase hinge protein [Source:ZFIN;Acc:ZDB-GENE-051030-93]	63	60	protein_coding	FALSE	FALSE
ENSDARG00000019496	esd	7.29518	1.32244	0	esterase D/formylglutathione hydrolase [Source:ZFIN;Acc:ZDB-GENE-050417-328]	79	80	protein_coding	FALSE	FALSE
ENSDARG00000041086	CABZ01071180.1	7.29518	1.47137	0		0	0	protein_coding	TRUE	TRUE
ENSDARG00000063370	sgk2a	7.29518	0.863062	0	serum/glucocorticoid regulated kinase 2a [Source:ZFIN;Acc:ZDB-GENE-030131-9632]	73	74	protein_coding	FALSE	FALSE
ENSDARG00000103720	ZFP36	7.29518	1.22653	0	zgc:162730 [Source:ZFIN;Acc:ZDB-GENE-030131-6366]	32	32	protein_coding	FALSE	FALSE
ENSDARG00000034326	ing3	7.26479	1.09421	0	inhibitor of growth family, member 3 [Source:ZFIN;Acc:ZDB-GENE-040109-3]	82	83	protein_coding	FALSE	FALSE
ENSDARG00000040620	psmg1	7.26479	1.24482	0	proteasome (prosome, macropain) assembly chaperone 1 [Source:ZFIN;Acc:ZDB-GENE-040718-469]	42	41	protein_coding	FALSE	FALSE
ENSDARG00000041421	taz	7.26479	0.645314	0	tafazzin [Source:ZFIN;Acc:ZDB-GENE-030131-684]	67	67	protein_coding	FALSE	FALSE
ENSDARG00000059923	slc25a47a	7.26479	0.943776	0	solute carrier family 25, member 47a [Source:ZFIN;Acc:ZDB-GENE-060616-266]	54	54	protein_coding	FALSE	FALSE
ENSDARG00000068894	nrip1b	7.26479	0.836121	0	nuclear receptor interacting protein 1b [Source:ZFIN;Acc:ZDB-GENE-030131-4173]	37	38	protein_coding	FALSE	FALSE
ENSDARG00000003526	psma5	7.23439	1.23343	0	proteasome subunit alpha 5 [Source:ZFIN;Acc:ZDB-GENE-040625-96]	96	96	protein_coding	FALSE	FALSE
ENSDARG00000055502	cicb	7.23439	1.44339	0	capicua transcriptional repressor b [Source:ZFIN;Acc:ZDB-GENE-030131-1966]	36	37	protein_coding	FALSE	FALSE
ENSDARG00000104837	nudc	7.23439	1.04867	0	nudC nuclear distribution protein [Source:ZFIN;Acc:ZDB-GENE-040426-899]	73	72	protein_coding	FALSE	FALSE
ENSDARG00000037017	ube4b	7.20399	1.24092	0	ubiquitination factor E4B, UFD2 homolog (S. cerevisiae) [Source:ZFIN;Acc:ZDB-GENE-020205-1]	71	74	protein_coding	FALSE	FALSE
ENSDARG00000059123	plcd1a	7.20399	1.43345	0	phospholipase C, delta 1a [Source:ZFIN;Acc:ZDB-GENE-071004-78]	54	56	protein_coding	FALSE	FALSE
ENSDARG00000077515	letm2	7.20399	0.717657	0	leucine zipper-EF-hand containing transmembrane protein 2 [Source:ZFIN;Acc:ZDB-GENE-090521-4]	52	53	protein_coding	TRUE	FALSE
ENSDARG00000077768	malt1b	7.20399	1.16245	0	MALT1 paracaspase b [Source:ZFIN;Acc:ZDB-GENE-070705-156]	52	53	protein_coding	FALSE	FALSE
ENSDARG00000089983	HSH2D	7.20399	1.33954	0	si:ch73-109i22.2 [Source:ZFIN;Acc:ZDB-GENE-141211-57]	15	17	protein_coding	FALSE	FALSE
ENSDARG00000007216	abce1	7.1736	1.4897	0	ATP-binding cassette, sub-family E (OABP), member 1 [Source:ZFIN;Acc:ZDB-GENE-040426-1995]	90	90	protein_coding	FALSE	FALSE
ENSDARG00000008706	paip2b	7.1736	1.04395	0	poly(A) binding protein interacting protein 2B [Source:ZFIN;Acc:ZDB-GENE-040426-1736]	64	60	protein_coding	FALSE	FALSE
ENSDARG00000044299	lmnb1	7.1736	1.30184	0	lamin B1 [Source:ZFIN;Acc:ZDB-GENE-020424-2]	67	68	protein_coding	FALSE	FALSE
ENSDARG00000058062	magt1	7.1736	0.693264	0	magnesium transporter 1 [Source:ZFIN;Acc:ZDB-GENE-030131-3667]	78	80	protein_coding	TRUE	TRUE
ENSDARG00000100838	BX640584.3	7.1736	1.15993	0		0	0	protein_coding	FALSE	FALSE
ENSDARG00000103670	cmc1	7.1736	1.36724	0	C-x(9)-C motif containing 1 [Source:ZFIN;Acc:ZDB-GENE-040426-2626]	65	67	protein_coding	FALSE	FALSE
ENSDARG00000013095	gclc	7.1432	1.48022	0	glutamate-cysteine ligase, catalytic subunit [Source:ZFIN;Acc:ZDB-GENE-030131-5056]	81	82	protein_coding	FALSE	FALSE
ENSDARG00000025535	clint1a	7.1432	1.49667	0	clathrin interactor 1a [Source:ZFIN;Acc:ZDB-GENE-030131-2590]	62	63	protein_coding	FALSE	FALSE
ENSDARG00000036625	polr2f	7.1432	1.43468	0	polymerase (RNA) II (DNA directed) polypeptide F [Source:ZFIN;Acc:ZDB-GENE-040718-279]	87	69	protein_coding	FALSE	FALSE
ENSDARG00000053878	inpp5l	7.1432	0.685534	0	inositol polyphosphate-5-phosphatase L [Source:ZFIN;Acc:ZDB-GENE-051127-29]	53	54	protein_coding	FALSE	FALSE
ENSDARG00000017423	patl1	7.1128	0.620756	0	protein associated with topoisomerase II homolog 1 (yeast) [Source:ZFIN;Acc:ZDB-GENE-070209-83]	47	47	protein_coding	FALSE	FALSE
ENSDARG00000052833	zfand3	7.1128	1.30926	0	zinc finger, AN1-type domain 3 [Source:ZFIN;Acc:ZDB-GENE-050706-134]	61	65	protein_coding	FALSE	FALSE
ENSDARG00000088142	si.dkey.159n16.2	7.1128	1.48385	0	si:dkey-159n16.2 [Source:ZFIN;Acc:ZDB-GENE-131121-650]	0	0	protein_coding	FALSE	FALSE
ENSDARG00000091869	zgc.171727	7.1128	1.04284	0	zgc:171727 [Source:ZFIN;Acc:ZDB-GENE-071004-26]	0	0	protein_coding	FALSE	FALSE
ENSDARG00000101127	map1lc3b	7.1128	0.749453	0	microtubule-associated protein 1 light chain 3 beta [Source:ZFIN;Acc:ZDB-GENE-030131-1145]	89	93	protein_coding	FALSE	FALSE
ENSDARG00000076082	CABZ01041962.1	7.08241	1.26842	0		0	0	protein_coding	FALSE	TRUE
ENSDARG00000030789	ddx18	7.05201	1.26835	0	DEAD (Asp-Glu-Ala-Asp) box polypeptide 18 [Source:ZFIN;Acc:ZDB-GENE-030131-9685]	72	72	protein_coding	FALSE	FALSE
ENSDARG00000079412	ftr02	7.05201	1.25891	0	finTRIM family, member 2 [Source:ZFIN;Acc:ZDB-GENE-070424-5]	0	0	protein_coding	FALSE	FALSE
ENSDARG00000102252	USP34	7.05201	0.621587	0	ubiquitin specific peptidase 34 [Source:HGNC Symbol;Acc:HGNC:20066]	85	86	protein_coding	FALSE	FALSE
ENSDARG00000104031	mrpl33	7.05201	1.24678	0	mitochondrial ribosomal protein L33 [Source:EntrezGene;Acc:100536515]	69	68	protein_coding	FALSE	FALSE
ENSDARG00000104693	il6st	7.05201	0.629055	0	interleukin 6 signal transducer [Source:ZFIN;Acc:ZDB-GENE-080104-6]	34	35	protein_coding	TRUE	TRUE
ENSDARG00000003035	hspa9	7.02161	0.378242	0	heat shock protein 9 [Source:ZFIN;Acc:ZDB-GENE-030828-12]	85	86	protein_coding	FALSE	FALSE
ENSDARG00000022807	PITPNC1	7.02161	0.690169	0	zgc:101640 [Source:ZFIN;Acc:ZDB-GENE-041114-158]	52	56	protein_coding	FALSE	FALSE
ENSDARG00000096651	gpr108	7.02161	1.19977	0	G protein-coupled receptor 108 [Source:ZFIN;Acc:ZDB-GENE-121214-129]	73	71	protein_coding	TRUE	TRUE
ENSDARG00000099213	glyr1	7.02161	1.39877	0	glyoxylate reductase 1 homolog (Arabidopsis) [Source:ZFIN;Acc:ZDB-GENE-041121-5]	82	82	protein_coding	FALSE	FALSE
ENSDARG00000098177	si.dkey.28i19.3	6.99122	0.644128	0	si:dkey-28i19.3 [Source:ZFIN;Acc:ZDB-GENE-110913-17]	0	0	protein_coding	FALSE	FALSE
ENSDARG00000099806	si.dkey.53k12.2	6.99122	0.879337	0	si:dkey-53k12.2 [Source:ZFIN;Acc:ZDB-GENE-141212-195]	0	0	protein_coding	FALSE	TRUE
ENSDARG00000039682	DUPD1..1.to.many..17	6.96082	1.22329	0	si:ch211-121a2.2 [Source:ZFIN;Acc:ZDB-GENE-070705-21]	20	21	protein_coding	FALSE	FALSE
ENSDARG00000039987	hivep2a	6.96082	1.49464	0	human immunodeficiency virus type I enhancer binding protein 2a [Source:ZFIN;Acc:ZDB-GENE-041014-354]	47	47	protein_coding	FALSE	FALSE
ENSDARG00000069521	vps29	6.96082	1.21942	0	vacuolar protein sorting 29 homolog (S. cerevisiae) [Source:ZFIN;Acc:ZDB-GENE-030131-8764]	97	96	protein_coding	FALSE	FALSE
ENSDARG00000102956	mmp17b	6.96082	0.479021	0	matrix metallopeptidase 17b [Source:ZFIN;Acc:ZDB-GENE-081107-17]	0	0	protein_coding	FALSE	TRUE
ENSDARG00000014825	ZNF865..1.to.many.	6.93042	1.39587	0	si:dkeyp-69b9.6 [Source:ZFIN;Acc:ZDB-GENE-100922-227]	16	17	protein_coding	FALSE	FALSE
ENSDARG00000043493	cltca	6.93042	1.37512	0	clathrin, heavy chain a (Hc) [Source:ZFIN;Acc:ZDB-GENE-030131-2299]	0	0	protein_coding	FALSE	FALSE
ENSDARG00000099256	pum1	6.93042	1.38288	0	pumilio RNA-binding family member 1 [Source:ZFIN;Acc:ZDB-GENE-030131-2074]	81	81	protein_coding	FALSE	FALSE
ENSDARG00000102247	CU463038.2	6.93042	1.45423	0		0	0	protein_coding	TRUE	FALSE
ENSDARG00000015649	rap2c	6.90003	1.49438	0	RAP2C, member of RAS oncogene family [Source:ZFIN;Acc:ZDB-GENE-041024-1]	93	93	protein_coding	FALSE	FALSE
ENSDARG00000017230	fbxw11b	6.90003	0.879368	0	F-box and WD repeat domain containing 11b [Source:ZFIN;Acc:ZDB-GENE-040426-2903]	88	88	protein_coding	FALSE	FALSE
ENSDARG00000095174	si.ch73.243b8.4	6.90003	1.34033	0	si:ch73-243b8.4 [Source:ZFIN;Acc:ZDB-GENE-091204-453]	0	0	protein_coding	FALSE	FALSE
ENSDARG00000101553	CABZ01111555.1	6.90003	0.786751	0		0	0	protein_coding	TRUE	FALSE
ENSDARG00000102924	zgc.112334	6.90003	1.28624	0	zgc:112334 [Source:ZFIN;Acc:ZDB-GENE-050809-120]	0	0	protein_coding	FALSE	FALSE
ENSDARG00000026682	zgc.101583	6.86963	1.48083	0	zgc:101583 [Source:ZFIN;Acc:ZDB-GENE-041212-75]	0	0	protein_coding	TRUE	FALSE
ENSDARG00000044241	dram2b	6.86963	0.836471	0	DNA-damage regulated autophagy modulator 2b [Source:ZFIN;Acc:ZDB-GENE-040625-141]	54	52	protein_coding	TRUE	FALSE
ENSDARG00000055966	cflara	6.86963	0.957671	0	CASP8 and FADD-like apoptosis regulator a [Source:ZFIN;Acc:ZDB-GENE-030826-3]	30	33	protein_coding	FALSE	FALSE
ENSDARG00000102704	si.ch1073.376c22.1	6.86963	0.642141	0	si:ch1073-376c22.1 [Source:ZFIN;Acc:ZDB-GENE-141210-15]	0	0	protein_coding	FALSE	TRUE
ENSDARG00000013122	maf1	6.83923	1.4692	0	MAF1 homolog, negative regulator of RNA polymerase III [Source:ZFIN;Acc:ZDB-GENE-040426-2788]	0	0	protein_coding	FALSE	FALSE
ENSDARG00000015315	psmc5	6.83923	0.680203	0	proteasome 26S subunit, ATPase 5 [Source:ZFIN;Acc:ZDB-GENE-030131-6547]	98	98	protein_coding	FALSE	FALSE
ENSDARG00000070506	CR450842.1	6.83923	0.497392	0		0	0	protein_coding	FALSE	FALSE
ENSDARG00000070832	snrka	6.83923	1.44355	0	SNF related kinase a [Source:ZFIN;Acc:ZDB-GENE-040718-84]	73	75	protein_coding	FALSE	FALSE
ENSDARG00000100357	si.ch73.44m9.3	6.83923	1.48969	0	si:ch73-44m9.3 [Source:ZFIN;Acc:ZDB-GENE-081104-290]	0	0	protein_coding	TRUE	TRUE
ENSDARG00000032802	ktn1	6.80884	1.17453	0	kinectin 1 [Source:ZFIN;Acc:ZDB-GENE-030408-4]	39	40	protein_coding	TRUE	FALSE
ENSDARG00000103600	st8sia4	6.80884	0.269268	0	ST8 alpha-N-acetyl-neuraminide alpha-2,8-sialyltransferase 4 [Source:ZFIN;Acc:ZDB-GENE-060322-10]	69	69	protein_coding	FALSE	TRUE
ENSDARG00000103979	calr3a	6.80884	1.08979	0	calreticulin 3a [Source:ZFIN;Acc:ZDB-GENE-000208-17]	55	44	protein_coding	FALSE	TRUE
ENSDARG00000017338	kidins220b	6.77844	0.806135	0	kinase D-interacting substrate 220b [Source:ZFIN;Acc:ZDB-GENE-030131-7824]	72	72	protein_coding	TRUE	FALSE
ENSDARG00000028889	ndufb10	6.77844	1.43942	0	NADH dehydrogenase (ubiquinone) 1 beta subcomplex, 10 [Source:ZFIN;Acc:ZDB-GENE-040426-1691]	56	54	protein_coding	FALSE	FALSE
ENSDARG00000061566	slc7a3b	6.77844	0.907165	0	solute carrier family 7 (cationic amino acid transporter, y+ system), member 3b [Source:ZFIN;Acc:ZDB-GENE-120813-6]	55	59	protein_coding	TRUE	FALSE
ENSDARG00000096988	cishb.2	6.77844	1.18939	0		0	0	antisense	NA	NA
ENSDARG00000020345	clasp2	6.74805	1.41686	0	cytoplasmic linker associated protein 2 [Source:ZFIN;Acc:ZDB-GENE-040426-2343]	66	66	protein_coding	FALSE	FALSE
ENSDARG00000030278	idh3a	6.74805	1.47984	0	isocitrate dehydrogenase 3 (NAD+) alpha [Source:ZFIN;Acc:ZDB-GENE-040426-1007]	85	85	protein_coding	FALSE	FALSE
ENSDARG00000069977	myg1	6.74805	1.34341	0	melanocyte proliferating gene 1 [Source:ZFIN;Acc:ZDB-GENE-060312-32]	60	59	protein_coding	FALSE	FALSE
ENSDARG00000005318	stam2	6.71765	0.91652	0	signal transducing adaptor molecule (SH3 domain and ITAM motif) 2 [Source:ZFIN;Acc:ZDB-GENE-041114-64]	59	62	protein_coding	FALSE	FALSE
ENSDARG00000017014	ywhae2	6.71765	0.577949	0	tyrosine 3-monooxygenase/tryptophan 5-monooxygenase activation protein, epsilon polypeptide 2 [Source:ZFIN;Acc:ZDB-GENE-050306-44]	0	0	protein_coding	FALSE	FALSE
ENSDARG00000019231	spna2	6.71765	1.13979	0	spectrin alpha 2 [Source:ZFIN;Acc:ZDB-GENE-051113-60]	52	54	protein_coding	FALSE	FALSE
ENSDARG00000019717	pbx2	6.71765	1.24533	0	pre-B-cell leukemia homeobox 2 [Source:ZFIN;Acc:ZDB-GENE-000405-5]	68	68	protein_coding	FALSE	FALSE
ENSDARG00000097206	si.ch211.66o10.5	6.71765	1.18764	0	si:ch211-66o10.5 [Source:ZFIN;Acc:ZDB-GENE-131120-132]	0	0	lincRNA	NA	NA
ENSDARG00000101334	ctsc	6.71765	1.25237	0	cathepsin C [Source:ZFIN;Acc:ZDB-GENE-030619-9]	60	63	protein_coding	FALSE	TRUE
ENSDARG00000103319	si.ch73.359m17.7	6.71765	0.745707	0	si:ch73-359m17.7 [Source:ZFIN;Acc:ZDB-GENE-141212-401]	0	0	protein_coding	FALSE	TRUE
ENSDARG00000026634	ehmt1b	6.68725	0.979341	0	euchromatic histone-lysine N-methyltransferase 1b [Source:ZFIN;Acc:ZDB-GENE-080515-3]	0	0	protein_coding	FALSE	FALSE
ENSDARG00000069360	ppp3r1b	6.68725	1.42315	0	protein phosphatase 3 (formerly 2B), regulatory s1ubunit B, alpha isoform, b [Source:ZFIN;Acc:ZDB-GENE-040912-18]	5	0	protein_coding	FALSE	FALSE
ENSDARG00000016548	eif5b	6.65686	1.28688	0	eukaryotic translation initiation factor 5B [Source:ZFIN;Acc:ZDB-GENE-050208-20]	69	70	protein_coding	FALSE	FALSE
ENSDARG00000070097	vimp	6.65686	1.27116	0	VCP-interacting membrane selenoprotein [Source:ZFIN;Acc:ZDB-GENE-060804-1]	46	48	protein_coding	TRUE	FALSE
ENSDARG00000094147	znf1111	6.65686	0.71913	0	zinc finger protein 1111 [Source:ZFIN;Acc:ZDB-GENE-110913-113]	0	0	protein_coding	FALSE	FALSE
ENSDARG00000098070	CABZ01085140.1	6.65686	1.16809	0		0	0	protein_coding	TRUE	FALSE
ENSDARG00000103403	sar1b	6.65686	0.669488	0	secretion associated, Ras related GTPase 1B [Source:ZFIN;Acc:ZDB-GENE-040426-1958]	92	92	protein_coding	FALSE	FALSE
ENSDARG00000012141	papolg	6.62646	0.79737	0	poly(A) polymerase gamma [Source:ZFIN;Acc:ZDB-GENE-040426-1256]	73	73	protein_coding	FALSE	FALSE
ENSDARG00000103320	lclat1	6.62646	0.578875	0	lysocardiolipin acyltransferase 1 [Source:ZFIN;Acc:ZDB-GENE-081211-2]	62	60	protein_coding	TRUE	FALSE
ENSDARG00000098375	polr1a	6.59606	0.9673	0	polymerase (RNA) I polypeptide A [Source:ZFIN;Acc:ZDB-GENE-030131-5286]	67	68	protein_coding	FALSE	FALSE
ENSDARG00000002787	tle3a	6.56567	0.65831	0	transducin-like enhancer of split 3a [Source:ZFIN;Acc:ZDB-GENE-990415-86]	90	89	protein_coding	FALSE	FALSE
ENSDARG00000025847	sox12	6.53527	1.44914	0	SRY (sex determining region Y)-box 12 [Source:ZFIN;Acc:ZDB-GENE-040724-33]	37	37	protein_coding	FALSE	FALSE
ENSDARG00000071618	si.ch211.213a13.5	6.53527	0.7293	0	si:ch211-213a13.5 [Source:ZFIN;Acc:ZDB-GENE-050208-711]	4	4	protein_coding	FALSE	FALSE
ENSDARG00000006290	ndufs5	6.50487	1.41983	0	NADH dehydrogenase (ubiquinone) Fe-S protein 5 [Source:ZFIN;Acc:ZDB-GENE-050522-437]	61	64	protein_coding	FALSE	FALSE
ENSDARG00000019581	uso1	6.50487	1.10639	0	USO1 vesicle transport factor [Source:ZFIN;Acc:ZDB-GENE-040426-688]	74	74	protein_coding	FALSE	FALSE
ENSDARG00000093058	si.dkey.13i19.8	6.50487	0.210494	0	si:dkey-13i19.8 [Source:ZFIN;Acc:ZDB-GENE-041210-156]	0	74	protein_coding	FALSE	FALSE
ENSDARG00000104502	RNH1..1.to.many..5	6.50487	1.39632	0	si:dkey-264f17.5 [Source:ZFIN;Acc:ZDB-GENE-120703-23]	0	0	protein_coding	FALSE	FALSE
ENSDARG00000018432	m6pr	6.47448	1.05535	0	mannose-6-phosphate receptor (cation dependent) [Source:ZFIN;Acc:ZDB-GENE-040426-2285]	49	49	protein_coding	TRUE	TRUE
ENSDARG00000103145	cdk2ap2	6.47448	0.798158	0	cyclin-dependent kinase 2 associated protein 2 [Source:ZFIN;Acc:ZDB-GENE-040718-35]	73	74	protein_coding	FALSE	FALSE
ENSDARG00000104968	si.ch211.227e10.1	6.47448	1.08679	0	si:ch211-227e10.1 [Source:ZFIN;Acc:ZDB-GENE-050420-221]	0	0	protein_coding	FALSE	FALSE
ENSDARG00000006747	tmem178b	6.44408	1.35095	0	transmembrane protein 178B [Source:ZFIN;Acc:ZDB-GENE-040718-92]	0	0	protein_coding	TRUE	TRUE
ENSDARG00000015524	prps1a	6.44408	1.28988	0	phosphoribosyl pyrophosphate synthetase 1A [Source:ZFIN;Acc:ZDB-GENE-011212-5]	93	88	protein_coding	FALSE	FALSE
ENSDARG00000018653	acot7	6.44408	0.8887	0	acyl-CoA thioesterase 7 [Source:ZFIN;Acc:ZDB-GENE-040912-42]	70	70	protein_coding	FALSE	FALSE
ENSDARG00000058794	zgc.113324	6.44408	0.757077	0	zgc:113324 [Source:ZFIN;Acc:ZDB-GENE-050306-13]	0	0	protein_coding	TRUE	TRUE
ENSDARG00000101028	fnbp1b.1	6.41368	0.926727	0	formin binding protein 1b [Source:ZFIN;Acc:ZDB-GENE-091117-6]	71	73	protein_coding	FALSE	FALSE
ENSDARG00000018825	tmem248	6.38329	0.52551	0	transmembrane protein 248 [Source:ZFIN;Acc:ZDB-GENE-050320-103]	79	79	protein_coding	TRUE	FALSE
ENSDARG00000019392	stat5a	6.38329	1.23611	0	signal transducer and activator of transcription 5a [Source:ZFIN;Acc:ZDB-GENE-030820-2]	72	78	protein_coding	FALSE	FALSE
ENSDARG00000098821	sec14l1	6.38329	0.933912	0	SEC14-like lipid binding 1 [Source:ZFIN;Acc:ZDB-GENE-040426-801]	0	0	protein_coding	FALSE	FALSE
ENSDARG00000071060	naa10	6.35289	0.439014	0	N(alpha)-acetyltransferase 10, NatA catalytic subunit [Source:ZFIN;Acc:ZDB-GENE-040426-2648]	74	74	protein_coding	FALSE	FALSE
ENSDARG00000038059	grb2b	6.2921	1.25179	0	growth factor receptor-bound protein 2b [Source:ZFIN;Acc:ZDB-GENE-040426-1975]	94	95	protein_coding	FALSE	FALSE
ENSDARG00000052113	hexa	6.2921	0.418685	0	hexosaminidase A (alpha polypeptide) [Source:ZFIN;Acc:ZDB-GENE-050417-283]	54	19	protein_coding	FALSE	TRUE
ENSDARG00000089138	LONRF2	6.2921	1.26253	0	si:ch1073-440b2.1 [Source:ZFIN;Acc:ZDB-GENE-030131-8303]	49	50	protein_coding	FALSE	FALSE
ENSDARG00000091367	prpf6	6.2921	1.27424	0	PRP6 pre-mRNA processing factor 6 homolog (S. cerevisiae) [Source:ZFIN;Acc:ZDB-GENE-030131-2575]	90	89	protein_coding	FALSE	FALSE
ENSDARG00000099745	baz1a	6.2921	0.876111	0	bromodomain adjacent to zinc finger domain, 1A [Source:ZFIN;Acc:ZDB-GENE-030131-6105]	61	62	protein_coding	FALSE	FALSE
ENSDARG00000055113	pom121	6.20091	0.915588	0	POM121 transmembrane nucleoporin [Source:ZFIN;Acc:ZDB-GENE-030131-6557]	16	8	protein_coding	TRUE	FALSE
ENSDARG00000070834	taf13	6.20091	1.39988	0	TAF13 RNA polymerase II, TATA box binding protein (TBP)-associated factor [Source:ZFIN;Acc:ZDB-GENE-030131-2873]	89	89	protein_coding	FALSE	FALSE
ENSDARG00000000151	thraa	6.17051	1.04075	0	thyroid hormone receptor alpha a [Source:ZFIN;Acc:ZDB-GENE-990415-263]	75	74	protein_coding	FALSE	FALSE
ENSDARG00000054031	mxd4	6.17051	1.41037	0	MAX dimerization protein 4 [Source:ZFIN;Acc:ZDB-GENE-050208-44]	76	76	protein_coding	FALSE	FALSE
ENSDARG00000070187	dyrk1b	6.14011	1.2687	0	dual-specificity tyrosine-(Y)-phosphorylation regulated kinase 1B [Source:ZFIN;Acc:ZDB-GENE-060503-499]	57	57	protein_coding	FALSE	FALSE
ENSDARG00000034086	zgc.65895	6.10972	0.990523	0	zgc:65895 [Source:ZFIN;Acc:ZDB-GENE-040426-1466]	0	0	protein_coding	FALSE	FALSE
ENSDARG00000019579	ldb2a	6.07932	0.48202	0	LIM domain binding 2a [Source:ZFIN;Acc:ZDB-GENE-990415-136]	73	73	protein_coding	FALSE	FALSE
ENSDARG00000096398	si.ch211.276a17.5	6.07932	0.854383	0	si:ch211-276a17.5 [Source:ZFIN;Acc:ZDB-GENE-120215-248]	0	0	protein_coding	TRUE	FALSE
ENSDARG00000057456	ppp3ccb	6.04892	1.42348	0	protein phosphatase 3, catalytic subunit, gamma isozyme, b [Source:ZFIN;Acc:ZDB-GENE-070112-1102]	74	76	protein_coding	FALSE	FALSE
ENSDARG00000078092	limd2	5.95773	1.28705	0	LIM domain containing 2 [Source:ZFIN;Acc:ZDB-GENE-120906-1]	73	74	protein_coding	FALSE	FALSE
ENSDARG00000103814	si.dkeyp.55h4.2	5.83615	1.36278	0	si:dkeyp-55h4.2 [Source:ZFIN;Acc:ZDB-GENE-131125-90]	0	0	processed_transcript	NA	NA
ENSDARG00000007413	arid2	5.77535	0.88284	0	AT rich interactive domain 2 (ARID, RFX-like) [Source:ZFIN;Acc:ZDB-GENE-030131-6311]	63	63	protein_coding	FALSE	FALSE
ENSDARG00000062361	PAXBP1	5.71456	1.20671	0	zgc:158234 [Source:ZFIN;Acc:ZDB-GENE-070112-2352]	56	56	protein_coding	FALSE	FALSE
ENSDARG00000095292	si.ch211.212i14.2	5.50178	0.429603	0	si:ch211-212i14.2 [Source:ZFIN;Acc:ZDB-GENE-100922-29]	0	0	processed_transcript	NA	NA
ENSDARG00000031731	si.ch73.27e22.6	5.41059	0.766932	0	si:ch73-27e22.6 [Source:ZFIN;Acc:ZDB-GENE-070705-234]	0	0	protein_coding	TRUE	TRUE
ENSDARG00000043247	gtf3c3	5.3498	0.603931	0	general transcription factor IIIC, polypeptide 3 [Source:ZFIN;Acc:ZDB-GENE-040914-80]	64	65	protein_coding	FALSE	FALSE
ENSDARG00000094332	vgll4a	5.28901	0.777255	0	vestigial-like family member 4a [Source:ZFIN;Acc:ZDB-GENE-100922-230]	0	0	protein_coding	FALSE	FALSE
ENSDARG00000098167	si.dkey.176f19.4	4.95465	0.706885	0	si:dkey-176f19.4 [Source:ZFIN;Acc:ZDB-GENE-110913-20]	10	9	protein_coding	FALSE	FALSE
ENSDARG00000079697	zgc.194908	4.92425	0.703007	0	zgc:194908 [Source:ZFIN;Acc:ZDB-GENE-081022-164]	0	0	protein_coding	FALSE	FALSE
ENSDARG00000102473	zgc.171673	4.92425	0.6308	0	zgc:171673 [Source:ZFIN;Acc:ZDB-GENE-071004-20]	0	0	protein_coding	FALSE	FALSE
ENSDARG00000023111	plg	4.89385	1.31942	0	plasminogen [Source:ZFIN;Acc:ZDB-GENE-030131-1411]	57	48	protein_coding	FALSE	TRUE
ENSDARG00000104633	CABZ01075125.2	4.68108	1.34999	0		0	0	protein_coding	FALSE	FALSE
ENSDARG00000095199	si.ch211.13o20.1	3.89076	1.35421	0	si:ch211-13o20.1 [Source:ZFIN;Acc:ZDB-GENE-090313-31]	0	0	processed_transcript	NA	NA
ENSDARG00000086808	ddhd1a	2.79649	0.841071	0	DDHD domain containing 1a [Source:ZFIN;Acc:ZDB-GENE-111020-16]	57	57	protein_coding	FALSE	FALSE
ENSDARG00000094494	CR926879.1	2.79649	0.247237	0		0	0	protein_coding	TRUE	TRUE
ENSDARG00000062565	kcnh4a	2.76609	0.887906	0	potassium voltage-gated channel, subfamily H (eag-related), member 4a [Source:ZFIN;Acc:ZDB-GENE-131125-34]	50	51	protein_coding	TRUE	FALSE
ENSDARG00000100654	si.dkey.207m2.4	2.73569	0.493113	0	si:dkey-207m2.4 [Source:ZFIN;Acc:ZDB-GENE-081103-58]	0	0	protein_coding	FALSE	FALSE
ENSDARG00000099112	si.dkey.71l4.3	2.43173	1.09145	0	si:dkey-71l4.3 [Source:ZFIN;Acc:ZDB-GENE-120703-25]	0	0	protein_coding	FALSE	FALSE
ENSDARG00000089934	si.ch211.64i20.3.3	2.37093	1.19715	0	si:ch211-64i20.3 [Source:ZFIN;Acc:ZDB-GENE-110913-55]	0	0	protein_coding	FALSE	FALSE
ENSDARG00000091561	si.dkey.156k2.4	2.24935	0.708944	0	si:dkey-156k2.4 [Source:ZFIN;Acc:ZDB-GENE-110913-8]	0	0	protein_coding	FALSE	FALSE
ENSDARG00000102616	si.dkey.3h2.3	2.24935	1.49983	0	si:dkey-3h2.3 [Source:ZFIN;Acc:ZDB-GENE-070705-465]	0	0	protein_coding	FALSE	FALSE
[truncated: 30,107 more rows]

## Sheet: C2vs(C1,C3)
Ensembl Gene ID	Gene Name	Fold Change	Z-score	adjusted Z-score	Description	% sequence identity against mouse ortholog	% sequence identity against human ortholog	Gene Type	transMembrane	signalPeptide
ENSDARG00000058673	nkl.2	11.0036	7.16081	5.91277	NK-lysin tandem duplicate 2 [Source:ZFIN;Acc:ZDB-GENE-150806-1]	0	0	protein_coding	TRUE	TRUE
ENSDARG00000041923	ccl38.6	9.72691	5.56883	4.35857	chemokine (C-C motif) ligand 38, duplicate 6 [Source:ZFIN;Acc:ZDB-GENE-041014-165]	0	0	protein_coding	FALSE	TRUE
ENSDARG00000057714	cmah	9.57493	5.47116	4.25931	cytidine monophospho-N-acetylneuraminic acid hydroxylase [Source:ZFIN;Acc:ZDB-GENE-040704-33]	66	0	protein_coding	FALSE	FALSE
ENSDARG00000000460	nitr2b	9.45334	5.41572	4.2078	novel immune-type receptor 2b [Source:ZFIN;Acc:ZDB-GENE-001106-6]	0	0	protein_coding	TRUE	TRUE
ENSDARG00000098656	CT574575.1	9.17977	5.47526	4.26125		0	0	protein_coding	FALSE	TRUE
ENSDARG00000055986	gzm-like	9.11898	5.75425	4.54558	si:ch211-165b19.5 [Source:ZFIN;Acc:ZDB-GENE-070912-133]	0	0	protein_coding	TRUE	TRUE
ENSDARG00000103276	fcr_gamma	9.05819	5.24668	4.02869	Fc fragment of IgE, high affinity I, receptor for; gamma polypeptide [Source:ZFIN;Acc:ZDB-GENE-061130-3]	40	42	protein_coding	TRUE	TRUE
ENSDARG00000079387	si.ch211.102c2.4	9.02779	5.34245	4.12956	si:ch211-102c2.4 [Source:ZFIN;Acc:ZDB-GENE-030131-8862]	0	0	protein_coding	TRUE	TRUE
ENSDARG00000043398	nitr2a	8.9366	4.94988	3.69164	novel immune-type receptor 2a [Source:ZFIN;Acc:ZDB-GENE-020225-28]	0	0	protein_coding	TRUE	TRUE
ENSDARG00000069848	nitr1b	8.9062	4.90202	3.64068	novel immune-type receptor 1b [Source:ZFIN;Acc:ZDB-GENE-020225-16]	0	0	protein_coding	TRUE	TRUE
ENSDARG00000061794	jam3b	8.84541	3.9909	2.63746	junctional adhesion molecule 3b [Source:ZFIN;Acc:ZDB-GENE-030131-441]	50	51	protein_coding	TRUE	FALSE
ENSDARG00000078451	gzm-like2	8.84541	7.16081	5.91277	si:ch211-165b19.4 [Source:ZFIN;Acc:ZDB-GENE-070912-132]	0	0	protein_coding	FALSE	TRUE
ENSDARG00000056438	her9	8.75422	5.30236	4.08703	hairy-related 9 [Source:ZFIN;Acc:ZDB-GENE-011213-1]	0	46	protein_coding	FALSE	FALSE
ENSDARG00000101767	lat2-like	8.75422	4.25713	2.91424	si:dkey-183i3.6 [Source:ZFIN;Acc:ZDB-GENE-141212-342]	0	0	protein_coding	TRUE	FALSE
ENSDARG00000091993	dicp1.1	8.60224	5.83174	4.61104	diverse immunoglobulin domain-containing protein 1.1 [Source:ZFIN;Acc:ZDB-GENE-120305-1]	0	0	protein_coding	TRUE	TRUE
ENSDARG00000093235	TST	8.57184	3.04495	1.69414	zgc:162544 [Source:ZFIN;Acc:ZDB-GENE-030131-9020]	56	55	protein_coding	FALSE	FALSE
ENSDARG00000103049	CR392341.1	8.57184	3.98441	2.62951		0	0	protein_coding	TRUE	TRUE
ENSDARG00000000906	skap2	8.54144	4.00978	2.65081	src kinase associated phosphoprotein 2 [Source:ZFIN;Acc:ZDB-GENE-030616-438]	0	0	protein_coding	FALSE	FALSE
ENSDARG00000041835	ccl38a.5	8.54144	4.88139	3.61674	chemokine (C-C motif) ligand 38, duplicate 5 [Source:ZFIN;Acc:ZDB-GENE-041014-167]	0	0	protein_coding	FALSE	TRUE
ENSDARG00000068374	si.ch211.132b12.7	8.51105	5.67081	4.45345	si:ch211-132b12.7 [Source:ZFIN;Acc:ZDB-GENE-050419-250]	0	0	protein_coding	FALSE	FALSE
ENSDARG00000075673	arhgap21b	8.45025	4.32241	2.98017	Rho GTPase activating protein 21b [Source:ZFIN;Acc:ZDB-GENE-030131-4944]	53	54	protein_coding	FALSE	FALSE
ENSDARG00000067977	nitr7b	8.35906	4.19181	2.8417	novel immune-type receptor 7b [Source:ZFIN;Acc:ZDB-GENE-041001-8]	0	0	protein_coding	TRUE	TRUE
ENSDARG00000088631	TRERF1	8.32867	2.79423	1.41066	transcriptional regulating factor 1 [Source:HGNC Symbol;Acc:HGNC:18273]	0	29	protein_coding	FALSE	FALSE
ENSDARG00000023724	cdc42se1	8.29827	4.64296	3.33441	CDC42 small effector 1 [Source:ZFIN;Acc:ZDB-GENE-030131-9260]	71	69	protein_coding	FALSE	FALSE
ENSDARG00000021366	fbp1a	8.26788	2.85816	1.47889	fructose-1,6-bisphosphatase 1a [Source:ZFIN;Acc:ZDB-GENE-030131-7171]	77	80	protein_coding	FALSE	FALSE
ENSDARG00000061473	tbkbp1	8.26788	3.68201	2.3183	TBK1 binding protein 1 [Source:ZFIN;Acc:ZDB-GENE-100203-1]	44	44	protein_coding	FALSE	FALSE
ENSDARG00000078217	cblc	8.26788	4.23964	2.89784	Cbl proto-oncogene C, E3 ubiquitin protein ligase [Source:ZFIN;Acc:ZDB-GENE-080220-20]	33	32	protein_coding	FALSE	FALSE
ENSDARG00000078973	uckl1b	8.26788	3.19983	1.86394	uridine-cytidine kinase 1-like 1b [Source:ZFIN;Acc:ZDB-GENE-090311-45]	80	80	protein_coding	FALSE	FALSE
ENSDARG00000061796	rasgrp4	8.23748	2.78428	1.39929	RAS guanyl releasing protein 4 [Source:ZFIN;Acc:ZDB-GENE-050419-110]	45	46	protein_coding	FALSE	FALSE
ENSDARG00000073969	prf1.7	8.23748	3.22127	1.88788	perforin 1.7 [Source:ZFIN;Acc:ZDB-GENE-111212-11]	35	36	protein_coding	TRUE	TRUE
ENSDARG00000075164	mylk5	8.23748	4.65562	3.3493	myosin, light chain kinase 5 [Source:ZFIN;Acc:ZDB-GENE-050309-74]	0	0	protein_coding	FALSE	FALSE
ENSDARG00000075437	shc1	8.23748	3.09083	1.74571	SHC (Src homology 2 domain containing) transforming protein 1 [Source:ZFIN;Acc:ZDB-GENE-030131-2538]	76	77	protein_coding	FALSE	FALSE
ENSDARG00000099674	dicp3.1	8.23748	2.51301	1.04878	diverse immunoglobulin domain-containing protein 3.1 [Source:ZFIN;Acc:ZDB-GENE-120306-18]	0	0	protein_coding	TRUE	TRUE
ENSDARG00000101633	CABZ01050166.1	8.23748	7.15476	5.91277		0	0	protein_coding	TRUE	FALSE
ENSDARG00000005551	hnrnph1l	8.20708	3.4174	2.07626	heterogeneous nuclear ribonucleoprotein H1, like [Source:ZFIN;Acc:ZDB-GENE-030131-275]	65	65	protein_coding	FALSE	FALSE
ENSDARG00000055759	efhd2	8.20708	4.00255	2.64871	EF-hand domain family, member D2 [Source:ZFIN;Acc:ZDB-GENE-060531-152]	68	68	protein_coding	FALSE	FALSE
ENSDARG00000076274	tnfsf14	8.20708	4.35799	3.02051	tumor necrosis factor (ligand) superfamily, member 14 [Source:ZFIN;Acc:ZDB-GENE-101109-3]	0	0	protein_coding	TRUE	FALSE
ENSDARG00000098913	fasl	8.20708	3.75248	2.38707	Fas ligand (TNF superfamily, member 6) [Source:ZFIN;Acc:ZDB-GENE-070410-16]	28	28	protein_coding	TRUE	FALSE
ENSDARG00000023532	pinx1	8.17669	3.00256	1.64229	PIN2/TERF1 interacting, telomerase inhibitor 1 [Source:ZFIN;Acc:ZDB-GENE-030515-2]	46	44	protein_coding	FALSE	FALSE
ENSDARG00000042837	atp1b3b	8.17669	2.72517	1.32433	ATPase, Na+/K+ transporting, beta 3b polypeptide [Source:ZFIN;Acc:ZDB-GENE-001127-1]	49	52	protein_coding	TRUE	FALSE
ENSDARG00000060766	PXN	8.17669	2.46296	0.977265	paxillin [Source:HGNC Symbol;Acc:HGNC:9718]	74	74	protein_coding	FALSE	FALSE
ENSDARG00000021444	prf1.2	8.14629	5.24769	4.02869	perforin 1.2 [Source:ZFIN;Acc:ZDB-GENE-111212-3]	35	37	protein_coding	FALSE	TRUE
ENSDARG00000024314	herpud1	8.14629	3.25004	1.91221	homocysteine-inducible, endoplasmic reticulum stress-inducible, ubiquitin-like domain member 1 [Source:ZFIN;Acc:ZDB-GENE-050913-47]	42	43	protein_coding	TRUE	FALSE
ENSDARG00000027222	adgrg1	8.14629	2.86534	1.48694	adhesion G protein-coupled receptor G1 [Source:ZFIN;Acc:ZDB-GENE-030131-3671]	0	0	protein_coding	TRUE	TRUE
ENSDARG00000091003	il34	8.14629	3.85844	2.4914	interleukin 34 [Source:ZFIN;Acc:ZDB-GENE-050419-150]	28	30	protein_coding	FALSE	TRUE
ENSDARG00000095939	si.ch73.226l13.2	8.14629	3.74246	2.37789	si:ch73-226l13.2 [Source:ZFIN;Acc:ZDB-GENE-110411-18]	0	0	protein_coding	FALSE	FALSE
ENSDARG00000030938	fermt3b	8.11589	2.721	1.31929	fermitin family member 3b [Source:ZFIN;Acc:ZDB-GENE-040426-1366]	63	64	protein_coding	FALSE	FALSE
ENSDARG00000054807	sec13	8.11589	2.57152	1.12721	SEC13 homolog, nuclear pore and COPII coat complex component [Source:ZFIN;Acc:ZDB-GENE-040426-2649]	88	88	protein_coding	FALSE	FALSE
ENSDARG00000059680	fscn1a	8.11589	2.64741	1.22815	fascin actin-bundling protein 1a [Source:ZFIN;Acc:ZDB-GENE-031009-1]	75	76	protein_coding	FALSE	FALSE
ENSDARG00000060471	gcnt3	8.11589	3.8904	2.52026	glucosaminyl (N-acetyl) transferase 3, mucin type [Source:ZFIN;Acc:ZDB-GENE-110411-253]	53	53	protein_coding	TRUE	FALSE
ENSDARG00000102912	gpr184	8.11589	2.105	0.459848	G protein-coupled receptor 184 [Source:ZFIN;Acc:ZDB-GENE-060929-1218]	0	0	protein_coding	TRUE	FALSE
ENSDARG00000012656	atf6	8.0855	3.51693	2.16014	activating transcription factor 6 [Source:ZFIN;Acc:ZDB-GENE-041014-328]	43	43	protein_coding	FALSE	FALSE
ENSDARG00000029431	PRR5L	8.0855	3.3202	1.97643	si:ch211-147k10.5 [Source:ZFIN;Acc:ZDB-GENE-120411-9]	55	55	protein_coding	FALSE	FALSE
ENSDARG00000100374	txnrd1	8.0855	3.76191	2.39582	thioredoxin reductase 1 [Source:ZFIN;Acc:ZDB-GENE-030327-2]	70	72	protein_coding	FALSE	FALSE
ENSDARG00000101860	CABZ01034528.1	8.0855	3.92999	2.56587		0	0	protein_coding	TRUE	TRUE
ENSDARG00000103984	cyth4b	8.0855	2.51143	1.04738	cytohesin 4b [Source:ZFIN;Acc:ZDB-GENE-080219-45]	67	70	protein_coding	FALSE	FALSE
ENSDARG00000019845	pdlim1	8.0551	3.45504	2.11	PDZ and LIM domain 1 (elfin) [Source:ZFIN;Acc:ZDB-GENE-030131-5227]	70	68	protein_coding	FALSE	FALSE
ENSDARG00000024116	vamp8	8.0551	2.23977	0.659592	vesicle-associated membrane protein 8 (endobrevin) [Source:ZFIN;Acc:ZDB-GENE-030131-5215]	51	48	protein_coding	TRUE	FALSE
ENSDARG00000035608	pgam5	8.0551	3.25705	1.91811	PGAM family member 5, serine/threonine protein phosphatase, mitochondrial [Source:ZFIN;Acc:ZDB-GENE-030131-683]	65	64	protein_coding	TRUE	TRUE
ENSDARG00000032606	sept8a	8.0247	3.30751	1.96621	septin 8a [Source:ZFIN;Acc:ZDB-GENE-030131-309]	87	88	protein_coding	FALSE	FALSE
ENSDARG00000041060	zgc.92326	8.0247	3.02466	1.66718	zgc:92326 [Source:ZFIN;Acc:ZDB-GENE-040718-159]	44	46	protein_coding	FALSE	FALSE
ENSDARG00000054389	rhof	8.0247	2.63022	1.20476	ras homolog family member F [Source:ZFIN;Acc:ZDB-GENE-050522-280]	64	64	protein_coding	FALSE	FALSE
ENSDARG00000005414	grapa	7.99431	2.60044	1.16164	GRB2-related adaptor protein a [Source:ZFIN;Acc:ZDB-GENE-050522-347]	57	32	protein_coding	FALSE	FALSE
ENSDARG00000021982	sh3bp2	7.99431	2.84223	1.46638	SH3-domain binding protein 2 [Source:ZFIN;Acc:ZDB-GENE-091204-268]	44	45	protein_coding	FALSE	FALSE
ENSDARG00000070165	tnfrsf1b	7.99431	4.30984	2.96977	tumor necrosis factor receptor superfamily, member 1B [Source:ZFIN;Acc:ZDB-GENE-070410-133]	22	24	protein_coding	TRUE	TRUE
ENSDARG00000018559	kdm7ab	7.96391	2.1028	0.457014	lysine (K)-specific demethylase 7Ab [Source:ZFIN;Acc:ZDB-GENE-050309-32]	54	55	protein_coding	FALSE	FALSE
ENSDARG00000056966	nek7	7.96391	2.09664	0.446907	NIMA-related kinase 7 [Source:ZFIN;Acc:ZDB-GENE-040801-136]	73	74	protein_coding	FALSE	FALSE
ENSDARG00000069958	sh2b3	7.96391	2.59401	1.15679	SH2B adaptor protein 3 [Source:ZFIN;Acc:ZDB-GENE-041210-359]	34	34	protein_coding	FALSE	FALSE
ENSDARG00000071261	BX248496.1	7.96391	3.04585	1.69442		0	0	protein_coding	TRUE	FALSE
ENSDARG00000097065	si.ch73.223p23.2	7.96391	4.04311	2.68287	si:ch73-223p23.2 [Source:ZFIN;Acc:ZDB-GENE-131121-616]	0	0	protein_coding	TRUE	TRUE
ENSDARG00000098108	dusp2	7.96391	3.46156	2.11436	dual specificity phosphatase 2 [Source:ZFIN;Acc:ZDB-GENE-040801-188]	50	50	protein_coding	FALSE	FALSE
ENSDARG00000033963	nitr1j	7.93351	4.12745	2.76518	novel immune-type receptor 1j [Source:EntrezGene;Acc:170969]	0	0	protein_coding	TRUE	TRUE
ENSDARG00000075560	kmt2cb	7.93351	2.34708	0.81726	lysine (K)-specific methyltransferase 2Cb [Source:ZFIN;Acc:ZDB-GENE-070705-340]	46	47	protein_coding	FALSE	FALSE
ENSDARG00000078056	RNF208	7.93351	3.3199	1.97643	ring finger protein 208 [Source:HGNC Symbol;Acc:HGNC:25420]	57	57	protein_coding	FALSE	FALSE
ENSDARG00000032155	ppm1aa	7.90312	3.26643	1.9258	protein phosphatase, Mg2+/Mn2+ dependent, 1Aa [Source:ZFIN;Acc:ZDB-GENE-991102-15]	81	80	protein_coding	FALSE	FALSE
ENSDARG00000038967	cul3a	7.90312	2.13674	0.50557	cullin 3a [Source:ZFIN;Acc:ZDB-GENE-030131-3376]	96	95	protein_coding	FALSE	FALSE
ENSDARG00000040822	fundc1	7.90312	2.88934	1.51064	FUN14 domain containing 1 [Source:ZFIN;Acc:ZDB-GENE-040718-466]	71	72	protein_coding	FALSE	FALSE
ENSDARG00000074362	FUT9..1.to.many..10	7.90312	1.61372	0	zgc:165582 [Source:ZFIN;Acc:ZDB-GENE-070820-9]	45	44	protein_coding	TRUE	FALSE
ENSDARG00000095272	si.ch211.10p21.1	7.90312	3.88545	2.51622	si:ch211-10p21.1 [Source:ZFIN;Acc:ZDB-GENE-060526-5]	0	0	protein_coding	TRUE	FALSE
ENSDARG00000099216	atp8b2	7.90312	3.83579	2.46891	ATPase, aminophospholipid transporter, class I, type 8B, member 2 [Source:ZFIN;Acc:ZDB-GENE-030131-2474]	49	48	protein_coding	TRUE	FALSE
ENSDARG00000010169	myd88	7.87272	2.7797	1.39318	myeloid differentiation primary response 88 [Source:ZFIN;Acc:ZDB-GENE-040219-3]	62	62	protein_coding	FALSE	FALSE
ENSDARG00000025903	lgals9l1	7.87272	4.02982	2.66961	lectin, galactoside-binding, soluble, 9 (galectin 9)-like 1 [Source:ZFIN;Acc:ZDB-GENE-030131-9543]	43	44	protein_coding	FALSE	FALSE
ENSDARG00000033596	polr2c	7.87272	2.84223	1.46638	polymerase (RNA) II (DNA directed) polypeptide C [Source:ZFIN;Acc:ZDB-GENE-030131-6609]	90	90	protein_coding	FALSE	FALSE
ENSDARG00000041724	glipr2	7.87272	2.81276	1.42968	GLI pathogenesis-related 2 [Source:ZFIN;Acc:ZDB-GENE-030131-4424]	0	0	protein_coding	FALSE	FALSE
ENSDARG00000086309	erlec1	7.87272	2.85013	1.47255	endoplasmic reticulum lectin 1 [Source:ZFIN;Acc:ZDB-GENE-030521-15]	70	70	protein_coding	FALSE	FALSE
ENSDARG00000101814	lpar3	7.87272	3.3468	2.00093	lysophosphatidic acid receptor 3 [Source:ZFIN;Acc:ZDB-GENE-120202-1]	61	61	protein_coding	TRUE	FALSE
ENSDARG00000003127	zgc.123105	7.84232	3.60506	2.25017	zgc:123105 [Source:ZFIN;Acc:ZDB-GENE-051113-272]	53	53	protein_coding	FALSE	FALSE
ENSDARG00000037556	st3gal5	7.84232	2.2879	0.728694	ST3 beta-galactoside alpha-2,3-sialyltransferase 5 [Source:ZFIN;Acc:ZDB-GENE-060322-1]	44	44	protein_coding	TRUE	FALSE
ENSDARG00000061048	ranbp9	7.84232	2.32178	0.779565	RAN binding protein 9 [Source:ZFIN;Acc:ZDB-GENE-021030-5]	80	81	protein_coding	FALSE	FALSE
ENSDARG00000090767	si.ch211.136m16.8	7.84232	3.93529	2.57219	si:ch211-136m16.8 [Source:ZFIN;Acc:ZDB-GENE-121214-301]	0	0	protein_coding	FALSE	FALSE
ENSDARG00000015576	itprip	7.81193	2.96121	1.59631	inositol 1,4,5-trisphosphate receptor interacting protein [Source:ZFIN;Acc:ZDB-GENE-050417-422]	0	45	protein_coding	FALSE	TRUE
ENSDARG00000057854	sap18	7.81193	2.08828	0.434899	Sin3A-associated protein [Source:ZFIN;Acc:ZDB-GENE-040426-1679]	90	90	protein_coding	FALSE	FALSE
ENSDARG00000054777	si.dkey.46a10.3	7.78153	2.16678	0.552584	si:dkey-46a10.3 [Source:ZFIN;Acc:ZDB-GENE-030131-4610]	47	46	protein_coding	FALSE	FALSE
ENSDARG00000055075	svila	7.78153	2.08482	0.429654	supervillin a [Source:ZFIN;Acc:ZDB-GENE-990706-5]	57	59	protein_coding	FALSE	FALSE
ENSDARG00000098766	pcxa	7.78153	2.46692	0.982123	pyruvate carboxylase a [Source:ZFIN;Acc:ZDB-GENE-090908-3]	83	83	protein_coding	FALSE	FALSE
ENSDARG00000004378	yrk	7.75113	1.82666	0	Yes-related kinase [Source:ZFIN;Acc:ZDB-GENE-030131-9517]	0	0	protein_coding	FALSE	FALSE
ENSDARG00000040620	psmg1	7.75113	1.73412	0	proteasome (prosome, macropain) assembly chaperone 1 [Source:ZFIN;Acc:ZDB-GENE-040718-469]	42	41	protein_coding	FALSE	FALSE
ENSDARG00000068641	taf10	7.75113	3.15892	1.82401	TAF10 RNA polymerase II, TATA box binding protein (TBP)-associated factor [Source:ZFIN;Acc:ZDB-GENE-060526-334]	67	68	protein_coding	FALSE	FALSE
ENSDARG00000078014	pacsin2	7.75113	2.43776	0.940722	protein kinase C and casein kinase substrate in neurons 2 [Source:ZFIN;Acc:ZDB-GENE-040426-2596]	63	63	protein_coding	FALSE	FALSE
ENSDARG00000091418	snx17	7.75113	3.56813	2.21558	sorting nexin 17 [Source:ZFIN;Acc:ZDB-GENE-030131-9475]	75	75	protein_coding	FALSE	FALSE
ENSDARG00000007294	aco2	7.72074	2.76512	1.37643	aconitase 2, mitochondrial [Source:ZFIN;Acc:ZDB-GENE-030131-1390]	82	82	protein_coding	FALSE	FALSE
ENSDARG00000014004	eif2b4	7.72074	4.28825	2.94494	eukaryotic translation initiation factor 2B, subunit 4 delta [Source:ZFIN;Acc:ZDB-GENE-030131-955]	59	60	protein_coding	FALSE	FALSE
ENSDARG00000060977	zgc.153018	7.72074	2.67751	1.26417	zgc:153018 [Source:ZFIN;Acc:ZDB-GENE-060929-752]	0	0	protein_coding	TRUE	FALSE
ENSDARG00000074378	junba	7.72074	3.0732	1.72349	jun B proto-oncogene a [Source:ZFIN;Acc:ZDB-GENE-040426-2172]	56	56	protein_coding	FALSE	FALSE
ENSDARG00000076358	BX005329.1	7.72074	4.58375	3.27237		0	0	protein_coding	FALSE	TRUE
ENSDARG00000089032	ZNF384..1.to.many.	7.72074	2.95639	1.59103	si:ch211-154o6.2 [Source:ZFIN;Acc:ZDB-GENE-030131-2855]	45	45	protein_coding	FALSE	FALSE
ENSDARG00000036420	CR376787.1	7.69034	2.26363	0.695385		0	0	protein_coding	FALSE	FALSE
ENSDARG00000045075	tmem106a	7.69034	1.97514	0.242829	transmembrane protein 106A [Source:ZFIN;Acc:ZDB-GENE-030131-5129]	32	33	protein_coding	TRUE	FALSE
ENSDARG00000070824	ndufb5	7.69034	2.17553	0.562115	NADH dehydrogenase (ubiquinone) 1 beta subcomplex 5 [Source:ZFIN;Acc:ZDB-GENE-011010-1]	53	56	protein_coding	TRUE	FALSE
ENSDARG00000006609	map2k2a	7.65994	1.94641	0.194531	mitogen-activated protein kinase kinase 2a [Source:ZFIN;Acc:ZDB-GENE-041027-1]	85	86	protein_coding	FALSE	FALSE
ENSDARG00000015161	zgc.92664	7.65994	2.5034	1.03769	zgc:92664 [Source:ZFIN;Acc:ZDB-GENE-040718-119]	65	67	protein_coding	FALSE	FALSE
ENSDARG00000036587	cbr1	7.65994	3.30203	1.96317	carbonyl reductase 1 [Source:ZFIN;Acc:ZDB-GENE-030902-2]	60	56	protein_coding	FALSE	FALSE
ENSDARG00000078386	dync1i2a	7.65994	2.28616	0.726211	dynein, cytoplasmic 1, intermediate chain 2a [Source:ZFIN;Acc:ZDB-GENE-060929-1086]	0	0	protein_coding	FALSE	FALSE
ENSDARG00000093024	si.ch211.213a13.2	7.65994	1.56379	0	si:ch211-213a13.2 [Source:ZFIN;Acc:ZDB-GENE-050208-551]	4	4	protein_coding	FALSE	FALSE
ENSDARG00000098671	prelid1a	7.65994	2.29034	0.731095	PRELI domain containing 1a [Source:ZFIN;Acc:ZDB-GENE-040426-1341]	71	71	protein_coding	FALSE	FALSE
ENSDARG00000104325	plek	7.65994	2.91686	1.544	pleckstrin [Source:ZFIN;Acc:ZDB-GENE-040426-1506]	66	67	protein_coding	FALSE	FALSE
ENSDARG00000019613	ip6k2b	7.62955	3.30284	1.96317	inositol hexakisphosphate kinase 2b [Source:ZFIN;Acc:ZDB-GENE-040718-85]	61	61	protein_coding	FALSE	FALSE
ENSDARG00000023600	sh3gl2	7.62955	7.16077	5.91277	SH3-domain GRB2-like 2 [Source:ZFIN;Acc:ZDB-GENE-040121-3]	76	76	protein_coding	FALSE	FALSE
ENSDARG00000044001	lgals3l	7.62955	2.86844	1.48989	lectin, galactoside-binding, soluble, 3 (galectin 3)-like [Source:ZFIN;Acc:ZDB-GENE-030131-4324]	0	0	protein_coding	FALSE	FALSE
ENSDARG00000070502	si.dkey.31e10.1	7.62955	3.51405	2.16014	si:dkey-31e10.1 [Source:ZFIN;Acc:ZDB-GENE-060503-356]	21	0	protein_coding	TRUE	TRUE
ENSDARG00000104953	stt3a	7.62955	4.26028	2.91512	STT3A, subunit of the oligosaccharyltransferase complex (catalytic) [Source:ZFIN;Acc:ZDB-GENE-021015-3]	96	96	protein_coding	TRUE	FALSE
ENSDARG00000067639	prpf4	7.59915	2.68953	1.27825	PRP4 pre-mRNA processing factor 4 homolog (yeast) [Source:ZFIN;Acc:ZDB-GENE-030131-5143]	79	80	protein_coding	FALSE	FALSE
ENSDARG00000078775	RASA2	7.59915	3.40729	2.06408	RAS p21 protein activator 2 [Source:HGNC Symbol;Acc:HGNC:9872]	65	68	protein_coding	FALSE	FALSE
ENSDARG00000004581	sel1l	7.56875	3.2627	1.92344	sel-1 suppressor of lin-12-like (C. elegans) [Source:ZFIN;Acc:ZDB-GENE-041001-122]	71	71	protein_coding	FALSE	TRUE
ENSDARG00000038067	smurf2	7.56875	2.8048	1.42061	SMAD specific E3 ubiquitin protein ligase 2 [Source:ZFIN;Acc:ZDB-GENE-030131-1830]	91	91	protein_coding	FALSE	FALSE
ENSDARG00000091280	si.ch211.66k16.27	7.56875	3.74969	2.38408	si:ch211-66k16.27 [Source:ZFIN;Acc:ZDB-GENE-120709-9]	0	0	protein_coding	FALSE	FALSE
ENSDARG00000093623	si.ch211.222e20.7	7.56875	6.29831	5.07551	si:ch211-222e20.7 [Source:ZFIN;Acc:ZDB-GENE-030131-4766]	0	0	processed_transcript	NA	NA
ENSDARG00000034768	phf3	7.53836	2.83146	1.45435	PHD finger protein 3 [Source:ZFIN;Acc:ZDB-GENE-090313-207]	31	31	protein_coding	FALSE	FALSE
ENSDARG00000103234	ppie	7.53836	3.19168	1.85619	peptidylprolyl isomerase E (cyclophilin E) [Source:ZFIN;Acc:ZDB-GENE-050417-167]	77	13	protein_coding	FALSE	FALSE
ENSDARG00000026762	fam126a	7.50796	2.56812	1.12461	family with sequence similarity 126, member A [Source:ZFIN;Acc:ZDB-GENE-040426-1806]	61	62	protein_coding	FALSE	FALSE
ENSDARG00000061915	git2a	7.50796	3.38104	2.03875	G protein-coupled receptor kinase interacting ArfGAP 2a [Source:ZFIN;Acc:ZDB-GENE-060526-267]	63	68	protein_coding	FALSE	FALSE
ENSDARG00000088019	si.ch211.114l13.12	7.50796	2.16904	0.55386	si:ch211-114l13.12 [Source:ZFIN;Acc:ZDB-GENE-120215-211]	0	0	protein_coding	TRUE	TRUE
ENSDARG00000101361	znf644a	7.50796	2.78901	1.40411	zinc finger protein 644a [Source:ZFIN;Acc:ZDB-GENE-030131-6244]	0	0	protein_coding	FALSE	FALSE
ENSDARG00000011581	si.dkey.23k10.5	7.47756	2.01187	0.304613	si:dkey-23k10.5 [Source:ZFIN;Acc:ZDB-GENE-030131-4787]	0	0	protein_coding	FALSE	FALSE
ENSDARG00000100109	trappc2l	7.47756	2.90769	1.53362	trafficking protein particle complex 2-like [Source:ZFIN;Acc:ZDB-GENE-040801-249]	85	85	protein_coding	FALSE	FALSE
ENSDARG00000101653	zgc.110171	7.47756	1.67018	0	zgc:110171 [Source:ZFIN;Acc:ZDB-GENE-050417-391]	0	0	protein_coding	FALSE	FALSE
ENSDARG00000005945	sart1	7.44717	1.82704	0	squamous cell carcinoma antigen recognised by T cells [Source:ZFIN;Acc:ZDB-GENE-040718-422]	67	68	protein_coding	FALSE	FALSE
ENSDARG00000014898	ncbp2	7.44717	2.24557	0.668049	nuclear cap binding protein subunit 2 [Source:ZFIN;Acc:ZDB-GENE-020419-31]	79	63	protein_coding	FALSE	FALSE
ENSDARG00000078894	hemk1	7.44717	2.51415	1.04987	HemK methyltransferase family member 1 [Source:ZFIN;Acc:ZDB-GENE-050208-185]	40	41	protein_coding	FALSE	FALSE
ENSDARG00000069270	si.dkey.182i3.11	7.41677	3.75667	2.3921	si:dkey-182i3.11 [Source:ZFIN;Acc:ZDB-GENE-121214-258]	0	0	protein_coding	FALSE	TRUE
ENSDARG00000090116	znf1136	7.41677	2.29628	0.739456	zinc finger protein 1136 [Source:ZFIN;Acc:ZDB-GENE-120709-10]	0	0	protein_coding	FALSE	FALSE
ENSDARG00000004161	ik	7.38637	1.99137	0.271972	IK cytokine [Source:ZFIN;Acc:ZDB-GENE-030131-960]	83	83	protein_coding	FALSE	FALSE
ENSDARG00000013346	fam208ab	7.38637	3.20065	1.86394	family with sequence similarity 208, member Ab [Source:ZFIN;Acc:ZDB-GENE-090311-29]	26	27	protein_coding	FALSE	FALSE
ENSDARG00000061478	igf2bp1	7.38637	2.01775	0.313769	insulin-like growth factor 2 mRNA binding protein 1 [Source:ZFIN;Acc:ZDB-GENE-060929-1258]	77	78	protein_coding	FALSE	FALSE
ENSDARG00000090164	si.ch73.362m14.2	7.35598	4.10574	2.74679	si:ch73-362m14.2 [Source:ZFIN;Acc:ZDB-GENE-120215-235]	0	0	protein_coding	FALSE	FALSE
ENSDARG00000044301	atf1	7.32558	1.52112	0	activating transcription factor 1 [Source:ZFIN;Acc:ZDB-GENE-030131-4334]	55	55	protein_coding	FALSE	FALSE
ENSDARG00000055912	nipa2	7.32558	3.30385	1.96317	non imprinted in Prader-Willi/Angelman syndrome 2 (human) [Source:ZFIN;Acc:ZDB-GENE-040426-2134]	78	80	protein_coding	TRUE	FALSE
ENSDARG00000102294	fbxo11a	7.32558	2.07096	0.404071	F-box protein 11a [Source:ZFIN;Acc:ZDB-GENE-061103-70]	97	97	protein_coding	FALSE	FALSE
ENSDARG00000010710	msi1	7.29518	2.80027	1.41645	musashi RNA-binding protein 1 [Source:ZFIN;Acc:ZDB-GENE-050320-86]	0	0	protein_coding	FALSE	FALSE
ENSDARG00000074183	DGKK	7.29518	1.88512	0.0801423	si:dkey-172j4.3 [Source:ZFIN;Acc:ZDB-GENE-081104-24]	40	44	protein_coding	FALSE	FALSE
ENSDARG00000075962	vav3b.1	7.29518	2.27386	0.707931	vav 3 guanine nucleotide exchange factor b [Source:ZFIN;Acc:ZDB-GENE-070912-251]	67	67	protein_coding	FALSE	FALSE
ENSDARG00000058868	apc	7.26479	3.06788	1.71758	adenomatous polyposis coli [Source:ZFIN;Acc:ZDB-GENE-031112-7]	68	68	protein_coding	FALSE	FALSE
ENSDARG00000094206	si.ch73.191k20.3	7.26479	3.28722	1.94539	si:ch73-191k20.3 [Source:ZFIN;Acc:ZDB-GENE-090312-62]	0	0	protein_coding	FALSE	FALSE
ENSDARG00000014770	usp4	7.23439	1.70059	0	ubiquitin specific peptidase 4 (proto-oncogene) [Source:ZFIN;Acc:ZDB-GENE-041008-187]	64	65	protein_coding	FALSE	FALSE
ENSDARG00000027600	pdlim5b	7.23439	3.68127	2.3183	PDZ and LIM domain 5b [Source:ZFIN;Acc:ZDB-GENE-040426-908]	51	46	protein_coding	FALSE	FALSE
ENSDARG00000008573	fam20b	7.20399	3.27533	1.9347	family with sequence similarity 20, member B (H. sapiens) [Source:ZFIN;Acc:ZDB-GENE-040724-125]	76	77	protein_coding	TRUE	FALSE
ENSDARG00000042732	tmem189	7.20399	2.42501	0.924419	transmembrane protein 189 [Source:ZFIN;Acc:ZDB-GENE-041010-150]	60	60	protein_coding	TRUE	FALSE
ENSDARG00000053656	lypla2	7.1736	2.0964	0.446886	lysophospholipase II [Source:ZFIN;Acc:ZDB-GENE-040426-1715]	75	75	protein_coding	FALSE	FALSE
ENSDARG00000067591	puraa	7.1432	2.74802	1.35582	purine-rich element binding protein Aa [Source:ZFIN;Acc:ZDB-GENE-040624-8]	87	87	protein_coding	FALSE	FALSE
ENSDARG00000071656	si.dkey.19a16.5	7.1432	3.01484	1.6573	si:dkey-19a16.5 [Source:ZFIN;Acc:ZDB-GENE-050208-733]	0	0	protein_coding	TRUE	TRUE
ENSDARG00000061039	atp10a	7.1128	2.96268	1.59756	ATPase, class V, type 10A [Source:ZFIN;Acc:ZDB-GENE-101102-1]	60	60	protein_coding	TRUE	FALSE
ENSDARG00000078613	vhll	7.05201	3.69342	2.32403	von Hippel-Lindau tumor suppressor like [Source:ZFIN;Acc:ZDB-GENE-081022-78]	0	0	protein_coding	FALSE	FALSE
ENSDARG00000000151	thraa	7.02161	1.65581	0	thyroid hormone receptor alpha a [Source:ZFIN;Acc:ZDB-GENE-990415-263]	75	74	protein_coding	FALSE	FALSE
ENSDARG00000017143	brd9	7.02161	1.93385	0.172746	bromodomain containing 9 [Source:ZFIN;Acc:ZDB-GENE-060502-1]	65	67	protein_coding	FALSE	FALSE
ENSDARG00000023578	lpp	7.02161	3.0369	1.68372	LIM domain containing preferred translocation partner in lipoma [Source:ZFIN;Acc:ZDB-GENE-040426-918]	67	69	protein_coding	FALSE	FALSE
ENSDARG00000095774	emd	7.02161	2.03843	0.351539	emerin (Emery-Dreifuss muscular dystrophy) [Source:ZFIN;Acc:ZDB-GENE-070501-2]	0	0	protein_coding	FALSE	FALSE
ENSDARG00000099751	si.dkey.250k10.4	7.02161	1.94852	0.19761	si:dkey-250k10.4 [Source:ZFIN;Acc:ZDB-GENE-120703-22]	10	9	protein_coding	FALSE	FALSE
ENSDARG00000040021	ebag9	6.93042	3.32697	1.98436	estrogen receptor binding site associated, antigen, 9 [Source:ZFIN;Acc:ZDB-GENE-040426-1093]	78	78	protein_coding	FALSE	FALSE
ENSDARG00000040387	mmd	6.86963	3.62499	2.2654	monocyte to macrophage differentiation-associated [Source:ZFIN;Acc:ZDB-GENE-051120-39]	79	79	protein_coding	TRUE	FALSE
ENSDARG00000041226	cdc40	6.83923	2.2727	0.706117	cell division cycle 40 homolog (S. cerevisiae) [Source:ZFIN;Acc:ZDB-GENE-050116-3]	83	83	protein_coding	FALSE	FALSE
ENSDARG00000077815	cdc26	6.80884	3.01936	1.66087	cell division cycle 26 homolog [Source:ZFIN;Acc:ZDB-GENE-040822-18]	63	64	protein_coding	FALSE	FALSE
ENSDARG00000013582	csnk2a2b	6.62646	2.19571	0.591151	casein kinase 2, alpha prime polypeptide b [Source:ZFIN;Acc:ZDB-GENE-090406-4]	86	85	protein_coding	FALSE	FALSE
ENSDARG00000057681	si.ch211.266o15.1	6.62646	2.80262	1.41895	si:ch211-266o15.1 [Source:ZFIN;Acc:ZDB-GENE-131127-116]	40	22	protein_coding	FALSE	FALSE
ENSDARG00000102643	chmp1a	6.53527	1.60943	0	charged multivesicular body protein 1A [Source:ZFIN;Acc:ZDB-GENE-040426-1474]	85	85	protein_coding	FALSE	FALSE
ENSDARG00000069937	dnm2a	6.2617	1.66833	0	dynamin 2a [Source:ZFIN;Acc:ZDB-GENE-050913-84]	87	86	protein_coding	FALSE	FALSE
ENSDARG00000100683	CT583625.5	6.07932	1.71149	0		0	0	protein_coding	FALSE	FALSE
ENSDARG00000076277	CR385050.1	5.98813	1.54593	0		0	0	protein_coding	TRUE	TRUE
ENSDARG00000092578	si.ch211.222e20.4	5.53218	7.15935	5.91277	si:ch211-222e20.4 [Source:ZFIN;Acc:ZDB-GENE-091118-60]	0	0	protein_coding	FALSE	FALSE
ENSDARG00000071604	si.ch211.156p11.1	5.47139	2.05484	0.378681	si:ch211-156p11.1 [Source:ZFIN;Acc:ZDB-GENE-070912-120]	0	0	protein_coding	FALSE	FALSE
ENSDARG00000104897	si.dkey.16p6.1.34	5.47139	2.01067	0.302823	si:dkey-16p6.1 [Source:ZFIN;Acc:ZDB-GENE-081103-43]	8	8	protein_coding	FALSE	FALSE
ENSDARG00000102870	si.dkeyp.123a12.2	4.95465	1.72111	0	si:dkeyp-123a12.2 [Source:ZFIN;Acc:ZDB-GENE-041210-271]	8	7	protein_coding	FALSE	FALSE
ENSDARG00000102309	si.ch211.106j21.6	4.86346	1.7418	0	si:ch211-106j21.6 [Source:ZFIN;Acc:ZDB-GENE-081103-22]	0	0	protein_coding	FALSE	FALSE
ENSDARG00000105263	cc3-like	4.52909	7.16081	5.91277		0	0	protein_coding	FALSE	TRUE
ENSDARG00000093602	si.ch211.93g21.1	3.34363	3.11575	1.77135	si:ch211-93g21.1 [Source:ZFIN;Acc:ZDB-GENE-060503-703]	0	0	protein_coding	TRUE	FALSE
ENSDARG00000095881	si.dkeyp.52c3.1	2.91807	1.57269	0	si:dkeyp-52c3.1 [Source:ZFIN;Acc:ZDB-GENE-110411-96]	0	0	processed_transcript	NA	NA
ENSDARG00000044023	nkl.4	2.79649	5.84091	4.61104	NK-lysin tandem duplicate 4 [Source:ZFIN;Acc:ZDB-GENE-030131-7503]	0	0	protein_coding	FALSE	TRUE
ENSDARG00000040526	s1pr5a	2.73569	4.90619	3.64384	sphingosine-1-phosphate receptor 5a [Source:ZFIN;Acc:ZDB-GENE-041114-188]	0	0	protein_coding	TRUE	FALSE
ENSDARG00000097610	si.ch211.136a14.2	2.52292	5.05365	3.81211	si:ch211-136a14.2 [Source:ZFIN;Acc:ZDB-GENE-131120-67]	0	0	lincRNA	NA	NA
ENSDARG00000101144	zdhhc13	2.52292	2.00268	0.291227	zinc finger, DHHC-type containing 13 [Source:ZFIN;Acc:ZDB-GENE-041212-79]	47	48	protein_coding	TRUE	FALSE
ENSDARG00000032849	ndrg1a	2.49252	2.89011	1.51081	N-myc downstream regulated 1a [Source:ZFIN;Acc:ZDB-GENE-030826-34]	64	65	protein_coding	FALSE	FALSE
ENSDARG00000074201	flna	2.46212	6.36554	5.13377	filamin A, alpha (actin binding protein 280) [Source:ZFIN;Acc:ZDB-GENE-030131-2145]	80	82	protein_coding	FALSE	FALSE
ENSDARG00000096046	si.ch211.209p16.4	2.46212	5.36575	4.15337	si:ch211-209p16.4 [Source:ZFIN;Acc:ZDB-GENE-110914-88]	0	0	antisense	NA	NA
ENSDARG00000078647	samsn1b	2.34054	4.61722	3.30824	SAM domain, SH3 domain and nuclear localisation signals 1b [Source:ZFIN;Acc:ZDB-GENE-041010-135]	52	50	protein_coding	FALSE	FALSE
ENSDARG00000088590	pxna	2.34054	4.40769	3.06673	paxillin a [Source:ZFIN;Acc:ZDB-GENE-040105-1]	76	75	protein_coding	FALSE	FALSE
ENSDARG00000093990	si.ch211.165b19.8	2.31014	3.7757	2.41099	si:ch211-165b19.8 [Source:ZFIN;Acc:ZDB-GENE-070912-135]	0	0	protein_coding	FALSE	TRUE
ENSDARG00000097209	cox8b	2.31014	2.96447	1.59877	cytochrome c oxidase subunit 8b [Source:ZFIN;Acc:ZDB-GENE-110620-4]	37	0	protein_coding	FALSE	FALSE
ENSDARG00000094002	ccl34b.4	2.27974	7.16081	5.91277	chemokine (C-C motif) ligand 34b, duplicate 4 [Source:ZFIN;Acc:ZDB-GENE-091204-344]	0	0	protein_coding	TRUE	TRUE
ENSDARG00000097847	si.ch211.269k10.4	2.24935	2.85197	1.47295	si:ch211-269k10.4 [Source:ZFIN;Acc:ZDB-GENE-131121-414]	0	0	protein_coding	TRUE	FALSE
ENSDARG00000008186	syk	2.18856	5.24253	4.02696	spleen tyrosine kinase [Source:ZFIN;Acc:ZDB-GENE-040702-3]	71	71	protein_coding	FALSE	FALSE
ENSDARG00000090473	si.ch211.269k10.5	2.18856	3.54642	2.19042	si:ch211-269k10.5 [Source:ZFIN;Acc:ZDB-GENE-131121-638]	0	0	protein_coding	TRUE	FALSE
ENSDARG00000077103	sema4aa	2.12776	1.96213	0.22167	sema domain, immunoglobulin domain (Ig), transmembrane domain (TM) and short cytoplasmic domain, (semaphorin) 4Aa [Source:ZFIN;Acc:ZDB-GENE-110411-86]	33	34	protein_coding	FALSE	TRUE
ENSDARG00000079353	si.ch211.165d12.4	2.09737	4.02341	2.6647	si:ch211-165d12.4 [Source:ZFIN;Acc:ZDB-GENE-080303-7]	0	0	protein_coding	TRUE	TRUE
ENSDARG00000035622	xbp1	2.06697	2.56552	1.12147	X-box binding protein 1 [Source:ZFIN;Acc:ZDB-GENE-011210-2]	28	26	protein_coding	FALSE	FALSE
ENSDARG00000102706	si.dkey.56m19.6	2.06697	5.44989	4.23878	si:dkey-56m19.6 [Source:ZFIN;Acc:ZDB-GENE-141216-129]	0	0	lincRNA	NA	NA
ENSDARG00000026630	mark3b	2.03657	2.61584	1.1824	MAP/microtubule affinity-regulating kinase 3b [Source:ZFIN;Acc:ZDB-GENE-060929-80]	79	80	protein_coding	FALSE	FALSE
ENSDARG00000071499	cxcl32b.1	2.03657	3.68289	2.3183	chemokine (C-X-C motif) ligand 32b, duplicate 1 [Source:ZFIN;Acc:ZDB-GENE-140715-4]	0	0	protein_coding	FALSE	TRUE
ENSDARG00000069441	lpar6b	1.88459	3.49322	2.14037	lysophosphatidic acid receptor 6b [Source:ZFIN;Acc:ZDB-GENE-110408-67]	56	56	protein_coding	TRUE	FALSE
ENSDARG00000086369	si.ch211.167j9.5	1.88459	2.74966	1.35707	si:ch211-167j9.5 [Source:ZFIN;Acc:ZDB-GENE-131121-210]	0	0	protein_coding	TRUE	FALSE
ENSDARG00000095421	si.dkey.106l3.6	1.88459	1.97913	0.250007	si:dkey-106l3.6 [Source:ZFIN;Acc:ZDB-GENE-091204-159]	0	0	processed_transcript	NA	NA
ENSDARG00000074752	hlfa	1.85419	2.11741	0.476009	hepatic leukemia factor a [Source:ZFIN;Acc:ZDB-GENE-061013-159]	74	74	protein_coding	FALSE	FALSE
ENSDARG00000103077	nk-cd7-like	1.85419	3.74835	2.38323	si:rp71-81e14.2 [Source:ZFIN;Acc:ZDB-GENE-060503-95]	0	0	protein_coding	TRUE	TRUE
ENSDARG00000073726	zbtb32	1.8238	2.94187	1.57567	zinc finger and BTB domain containing 32 [Source:ZFIN;Acc:ZDB-GENE-131121-166]	27	26	protein_coding	FALSE	FALSE
ENSDARG00000009881	ier5	1.7934	2.0556	0.378867	immediate early response 5 [Source:ZFIN;Acc:ZDB-GENE-030616-127]	38	39	protein_coding	FALSE	FALSE
ENSDARG00000090159	si.dkey.37m8.8	1.7934	5.15092	3.93251	si:dkey-37m8.8 [Source:ZFIN;Acc:ZDB-GENE-050208-530]	0	0	processed_transcript	NA	NA
ENSDARG00000097533	si.dkey.29l4.4	1.763	6.72365	5.50021	si:dkey-29l4.4 [Source:ZFIN;Acc:ZDB-GENE-131122-41]	0	0	lincRNA	NA	NA
ENSDARG00000018382	prkcha	1.73261	2.78542	1.40017	protein kinase C, eta, a [Source:ZFIN;Acc:ZDB-GENE-080402-5]	63	64	protein_coding	FALSE	FALSE
ENSDARG00000077618	rin3	1.73261	2.46909	0.98515	Ras and Rab interactor 3 [Source:ZFIN;Acc:ZDB-GENE-030131-8871]	36	35	protein_coding	FALSE	FALSE
ENSDARG00000102042	DTX1	1.73261	1.51021	0	deltex 1, E3 ubiquitin ligase [Source:HGNC Symbol;Acc:HGNC:3060]	82	82	protein_coding	FALSE	FALSE
ENSDARG00000053979	bc2	1.70221	1.85344	0.0186822	putative breast adenocarcinoma marker [Source:ZFIN;Acc:ZDB-GENE-040426-2922]	89	89	protein_coding	FALSE	FALSE
ENSDARG00000018145	mid1ip1l	1.67181	2.84798	1.47113	MID1 interacting protein 1, like [Source:ZFIN;Acc:ZDB-GENE-030131-1697]	0	0	protein_coding	FALSE	FALSE
ENSDARG00000028731	stat4	1.67181	2.0848	0.429654	signal transducer and activator of transcription 4 [Source:ZFIN;Acc:ZDB-GENE-030616-264]	0	0	protein_coding	FALSE	FALSE
ENSDARG00000075720	il2rb	1.64142	7.12245	5.89345	interleukin 2 receptor, beta [Source:ZFIN;Acc:ZDB-GENE-080108-2]	19	20	protein_coding	TRUE	TRUE
ENSDARG00000087640	nsfl1c	1.64142	1.74182	0	NSFL1 (p97) cofactor (p47) [Source:ZFIN;Acc:ZDB-GENE-041114-160]	70	72	protein_coding	FALSE	FALSE
ENSDARG00000096655	si.ch211.184m19.3	1.64142	6.34242	5.11381	si:ch211-184m19.3 [Source:ZFIN;Acc:ZDB-GENE-121214-87]	0	0	antisense	NA	NA
ENSDARG00000097137	si.dkeyp.116a7.2	1.64142	5.62788	4.41874	si:dkeyp-116a7.2 [Source:ZFIN;Acc:ZDB-GENE-131119-72]	0	0	lincRNA	NA	NA
ENSDARG00000008503	glcci1	1.61102	2.25146	0.677801	glucocorticoid induced 1 [Source:ZFIN;Acc:ZDB-GENE-031010-41]	49	49	protein_coding	FALSE	FALSE
ENSDARG00000091367	prpf6	1.61102	1.64739	0	PRP6 pre-mRNA processing factor 6 homolog (S. cerevisiae) [Source:ZFIN;Acc:ZDB-GENE-030131-2575]	90	89	protein_coding	FALSE	FALSE
ENSDARG00000096508	si.ch211.265g21.1	1.61102	6.83124	5.60529	si:ch211-265g21.1 [Source:ZFIN;Acc:ZDB-GENE-121214-158]	0	0	lincRNA	NA	NA
ENSDARG00000035519	histh1l	1.58062	1.97896	0.250007	histone H1 like [Source:ZFIN;Acc:ZDB-GENE-050417-145]	49	47	protein_coding	FALSE	FALSE
ENSDARG00000038754	plk3	1.58062	3.98347	2.6295	polo-like kinase 3 (Drosophila) [Source:ZFIN;Acc:ZDB-GENE-030131-6134]	56	55	protein_coding	FALSE	FALSE
ENSDARG00000097553	si.dkey.193e13.8	1.58062	6.98771	5.76522	si:dkey-193e13.8 [Source:ZFIN;Acc:ZDB-GENE-131122-33]	0	0	lincRNA	NA	NA
ENSDARG00000098405	map3k1	1.58062	1.75651	0	mitogen-activated protein kinase kinase kinase 1, E3 ubiquitin protein ligase [Source:ZFIN;Acc:ZDB-GENE-090313-412]	67	68	protein_coding	FALSE	FALSE
ENSDARG00000053485	aldh6a1	1.51983	1.9585	0.218126	aldehyde dehydrogenase 6 family, member A1 [Source:ZFIN;Acc:ZDB-GENE-030131-9192]	83	82	protein_coding	TRUE	FALSE
ENSDARG00000095351	si.ch73.308b14.1	1.51983	6.64086	5.42212	si:ch73-308b14.1 [Source:ZFIN;Acc:ZDB-GENE-091204-411]	0	0	processed_transcript	NA	NA
ENSDARG00000015068	TXK	1.48943	2.45687	0.967454	TXK tyrosine kinase [Source:HGNC Symbol;Acc:HGNC:12434]	62	62	protein_coding	FALSE	FALSE
ENSDARG00000097680	ADGRE5..1.to.many.	1.48943	2.05148	0.374967	si:ch211-241f5.3 [Source:ZFIN;Acc:ZDB-GENE-131127-563]	41	44	protein_coding	TRUE	FALSE
ENSDARG00000103179	si.dkey.109a10.1	1.48943	1.55673	0	si:dkey-109a10.1 [Source:ZFIN;Acc:ZDB-GENE-141212-360]	0	0	lincRNA	NA	NA
ENSDARG00000040076	pycard	1.45904	2.31799	0.774579	PYD and CARD domain containing [Source:ZFIN;Acc:ZDB-GENE-000511-2]	28	31	protein_coding	FALSE	FALSE
ENSDARG00000105408	si.ch211.237b12.4	1.45904	6.3192	5.09338	si:ch211-237b12.4 [Source:ZFIN;Acc:ZDB-GENE-030131-8765]	NA	NA	antisense	NA	NA
ENSDARG00000006242	ptp4a1	1.39824	1.58376	0	protein tyrosine phosphatase type IVA, member 1 [Source:ZFIN;Acc:ZDB-GENE-041121-11]	77	77	protein_coding	TRUE	FALSE
ENSDARG00000045417	fam49bb	1.39824	1.83858	0	family with sequence similarity 49, member Bb [Source:ZFIN;Acc:ZDB-GENE-040426-2590]	74	75	protein_coding	FALSE	FALSE
ENSDARG00000058203	smc1al	1.39824	1.52721	0	structural maintenance of chromosomes 1A, like [Source:ZFIN;Acc:ZDB-GENE-040426-57]	90	90	protein_coding	FALSE	FALSE
ENSDARG00000069961	il21r.1	1.36785	1.99773	0.284183	interleukin 21 receptor, tandem duplicate 1 [Source:ZFIN;Acc:ZDB-GENE-080108-6]	24	23	protein_coding	TRUE	TRUE
ENSDARG00000089878	nedd9	1.36785	2.69206	1.2819	neural precursor cell expressed, developmentally down-regulated 9 [Source:ZFIN;Acc:ZDB-GENE-061013-318]	48	49	protein_coding	FALSE	FALSE
ENSDARG00000062057	zgc.174945	1.33745	1.92756	0.160064	zgc:174945 [Source:ZFIN;Acc:ZDB-GENE-080204-80]	0	0	protein_coding	TRUE	TRUE
ENSDARG00000070669	cxcr3.3	1.33745	1.78809	0	chemokine (C-X-C motif) receptor 3, tandem duplicate 3 [Source:ZFIN;Acc:ZDB-GENE-100922-34]	0	0	protein_coding	TRUE	FALSE
ENSDARG00000077069	srgn	1.33745	2.09059	0.438001	serglycin [Source:ZFIN;Acc:ZDB-GENE-030131-7127]	0	0	protein_coding	TRUE	TRUE
ENSDARG00000002215	rtca	1.30705	1.59444	0	RNA 3'-terminal phosphate cyclase [Source:ZFIN;Acc:ZDB-GENE-030131-9687]	71	75	protein_coding	FALSE	FALSE
ENSDARG00000007783	blk	1.30705	1.77276	0	BLK proto-oncogene, Src family tyrosine kinase [Source:ZFIN;Acc:ZDB-GENE-040724-106]	66	66	protein_coding	FALSE	FALSE
ENSDARG00000042308	arhgef18b	1.30705	1.75996	0	rho/rac guanine nucleotide exchange factor (GEF) 18b [Source:ZFIN;Acc:ZDB-GENE-070705-462]	48	50	protein_coding	FALSE	FALSE
ENSDARG00000070583	itpk1b	1.30705	1.63498	0	inositol-tetrakisphosphate 1-kinase b [Source:ZFIN;Acc:ZDB-GENE-131126-72]	72	72	protein_coding	FALSE	FALSE
ENSDARG00000090844	IL1RL2	1.30705	1.67086	0	interleukin 1 receptor-like 2 [Source:HGNC Symbol;Acc:HGNC:5999]	22	25	protein_coding	TRUE	FALSE
ENSDARG00000079347	zgc.194659	1.27666	1.99843	0.28478	zgc:194659 [Source:ZFIN;Acc:ZDB-GENE-081022-139]	0	0	protein_coding	FALSE	FALSE
ENSDARG00000005481	nfkbiaa	1.24626	1.76129	0	nuclear factor of kappa light polypeptide gene enhancer in B-cells inhibitor, alpha a [Source:ZFIN;Acc:ZDB-GENE-040426-2227]	50	49	protein_coding	FALSE	FALSE
ENSDARG00000010155	abi1a	1.24626	1.88685	0.0821385	abl-interactor 1a [Source:ZFIN;Acc:ZDB-GENE-040426-1701]	79	80	protein_coding	FALSE	FALSE
ENSDARG00000026070	cd82b	1.24626	2.16721	0.55265	CD82 molecule b [Source:ZFIN;Acc:ZDB-GENE-030131-2857]	57	55	protein_coding	TRUE	FALSE
ENSDARG00000046132	dynlt3	1.24626	2.02415	0.325683	dynein, light chain, Tctex-type 3 [Source:ZFIN;Acc:ZDB-GENE-040927-24]	61	61	protein_coding	FALSE	FALSE
ENSDARG00000061841	tiparp	1.24626	1.70568	0	TCDD-inducible poly(ADP-ribose) polymerase [Source:ZFIN;Acc:ZDB-GENE-031002-47]	53	53	protein_coding	FALSE	FALSE
ENSDARG00000015495	klf3	1.21586	3.47167	2.12035	Kruppel-like factor 3 (basic) [Source:ZFIN;Acc:ZDB-GENE-011116-1]	42	42	protein_coding	FALSE	FALSE
ENSDARG00000035161	pkdcca	1.21586	2.0989	0.450714	protein kinase domain containing, cytoplasmic a [Source:ZFIN;Acc:ZDB-GENE-081107-30]	56	57	protein_coding	TRUE	FALSE
ENSDARG00000051763	sntb2	1.21586	1.56402	0	syntrophin, beta 2 [Source:ZFIN;Acc:ZDB-GENE-131121-511]	61	62	protein_coding	FALSE	FALSE
ENSDARG00000089043	ptpn6	1.21586	3.76073	2.39582	protein tyrosine phosphatase, non-receptor type 6 [Source:ZFIN;Acc:ZDB-GENE-030131-7513]	65	63	protein_coding	FALSE	FALSE
ENSDARG00000100055	tox2	1.21586	2.02649	0.330144	TOX high mobility group box family member 2 [Source:ZFIN;Acc:ZDB-GENE-040426-2095]	0	0	protein_coding	FALSE	FALSE
ENSDARG00000024209	wasf2	1.18547	1.69983	0	WAS protein family, member 2 [Source:ZFIN;Acc:ZDB-GENE-040426-865]	64	65	protein_coding	FALSE	FALSE
ENSDARG00000037155	si.dkey.78k11.9	1.18547	1.67848	0	si:dkey-78k11.9 [Source:ZFIN;Acc:ZDB-GENE-060503-929]	0	0	protein_coding	TRUE	FALSE
ENSDARG00000031680	ercc1	1.15507	1.59352	0	excision repair cross-complementation group 1 [Source:ZFIN;Acc:ZDB-GENE-040426-2606]	49	48	protein_coding	FALSE	FALSE
ENSDARG00000039563	loxl3b	1.15507	1.54765	0	lysyl oxidase-like 3b [Source:ZFIN;Acc:ZDB-GENE-030131-8210]	64	65	protein_coding	FALSE	TRUE
ENSDARG00000041391	tmed10	1.15507	1.94731	0.195687	transmembrane p24 trafficking protein 10 [Source:ZFIN;Acc:ZDB-GENE-030131-4915]	83	82	protein_coding	TRUE	TRUE
ENSDARG00000053291	pnrc2	1.15507	2.46914	0.98515	proline-rich nuclear receptor coactivator 2 [Source:ZFIN;Acc:ZDB-GENE-030131-5475]	45	47	protein_coding	FALSE	FALSE
ENSDARG00000030012	lrrfip1a	1.09428	2.6599	1.24181	leucine rich repeat (in FLII) interacting protein 1a [Source:ZFIN;Acc:ZDB-GENE-030131-99]	13	15	protein_coding	FALSE	FALSE
ENSDARG00000057974	parp12b	1.09428	1.62422	0	poly (ADP-ribose) polymerase family, member 12b [Source:ZFIN;Acc:ZDB-GENE-030131-2617]	0	0	protein_coding	FALSE	FALSE
ENSDARG00000038524	pik3r1	1.06388	2.34768	0.817597	phosphoinositide-3-kinase, regulatory subunit 1 (alpha) [Source:ZFIN;Acc:ZDB-GENE-030131-1280]	78	79	protein_coding	FALSE	FALSE
ENSDARG00000036104	MYO1G	1.03348	1.52001	0	si:dkeyp-92c9.3 [Source:ZFIN;Acc:ZDB-GENE-060503-562]	62	63	protein_coding	FALSE	FALSE
ENSDARG00000040237	mef2d	1.03348	1.85823	0.0277871	myocyte enhancer factor 2d [Source:ZFIN;Acc:ZDB-GENE-990415-164]	60	62	protein_coding	FALSE	FALSE
ENSDARG00000099026	si.dkey.185m8.2	1.03348	1.90239	0.113297	si:dkey-185m8.2 [Source:ZFIN;Acc:ZDB-GENE-160114-60]	0	0	protein_coding	FALSE	FALSE
ENSDARG00000102452	eif3ha	1.03348	1.54131	0	eukaryotic translation initiation factor 3, subunit H, a [Source:ZFIN;Acc:ZDB-GENE-040808-19]	84	84	protein_coding	FALSE	FALSE
ENSDARG00000002396	cry.dash	0.942295	1.51611	0	cryptochrome DASH [Source:ZFIN;Acc:ZDB-GENE-040617-2]	0	0	protein_coding	FALSE	FALSE
ENSDARG00000059001	pim2	0.942295	1.71698	0	Pim-2 proto-oncogene, serine/threonine kinase [Source:ZFIN;Acc:ZDB-GENE-000831-6]	52	51	protein_coding	FALSE	FALSE
ENSDARG00000078653	ralbp1	0.942295	1.74147	0	ralA binding protein 1 [Source:ZFIN;Acc:ZDB-GENE-040426-2098]	73	74	protein_coding	FALSE	FALSE
ENSDARG00000099401	ccl33.3	0.942295	2.20764	0.610627	chemokine (C-C motif) ligand 33, duplicate 3 [Source:ZFIN;Acc:ZDB-GENE-081104-131]	0	0	processed_transcript	NA	NA
ENSDARG00000001656	psmb10	0.911898	1.53033	0	proteasome subunit beta 10 [Source:ZFIN;Acc:ZDB-GENE-001208-2]	0	0	protein_coding	FALSE	FALSE
ENSDARG00000006092	rad21a	0.911898	1.55295	0	RAD21 cohesin complex component a [Source:ZFIN;Acc:ZDB-GENE-030131-994]	74	75	protein_coding	FALSE	FALSE
ENSDARG00000035858	cnn2	0.911898	1.68686	0	calponin 2 [Source:ZFIN;Acc:ZDB-GENE-030131-542]	72	73	protein_coding	FALSE	FALSE
ENSDARG00000100383	il10ra	0.911898	1.66038	0	interleukin 10 receptor, alpha [Source:ZFIN;Acc:ZDB-GENE-070905-4]	0	0	protein_coding	TRUE	TRUE
ENSDARG00000070995	inpp4ab	0.881501	1.62765	0	inositol polyphosphate-4-phosphatase type I Ab [Source:ZFIN;Acc:ZDB-GENE-081104-521]	78	78	protein_coding	FALSE	FALSE
ENSDARG00000003795	IDH2	0.851105	1.88184	0.0732591	isocitrate dehydrogenase 2 (NADP+), mitochondrial [Source:HGNC Symbol;Acc:HGNC:5383]	64	64	protein_coding	FALSE	FALSE
ENSDARG00000016774	plekho2	0.851105	2.92144	1.54814	pleckstrin homology domain containing, family O member 2 [Source:ZFIN;Acc:ZDB-GENE-120406-4]	24	25	protein_coding	FALSE	FALSE
ENSDARG00000058128	msna	0.851105	2.54331	1.09114	moesin a [Source:ZFIN;Acc:ZDB-GENE-021211-2]	84	84	protein_coding	FALSE	FALSE
ENSDARG00000067751	si.rp71.68n21.9	0.851105	1.68965	0	si:rp71-68n21.9 [Source:ZFIN;Acc:ZDB-GENE-081105-100]	0	0	protein_coding	FALSE	FALSE
ENSDARG00000071491	nrros	0.851105	3.58405	2.22921	negative regulator of reactive oxygen species [Source:ZFIN;Acc:ZDB-GENE-040808-36]	37	36	protein_coding	TRUE	TRUE
ENSDARG00000101785	LAPTM5	0.851105	2.33969	0.807238	lysosomal protein transmembrane 5 [Source:HGNC Symbol;Acc:HGNC:29612]	25	25	protein_coding	TRUE	FALSE
ENSDARG00000104066	dnaja2	0.851105	1.50175	0	DnaJ (Hsp40) homolog, subfamily A, member 2 [Source:ZFIN;Acc:ZDB-GENE-040426-2884]	86	86	protein_coding	FALSE	FALSE
ENSDARG00000020759	ef1	0.820708	2.71965	1.3185	E74-like factor 1 (ets domain transcription factor) [Source:ZFIN;Acc:ZDB-GENE-980526-335]	38	40	protein_coding	FALSE	FALSE
ENSDARG00000098794	si.dkey.28k24.2	0.820708	2.28485	0.72408	si:dkey-28k24.2 [Source:ZFIN;Acc:ZDB-GENE-121213-4]	6	5	protein_coding	FALSE	FALSE
ENSDARG00000104197	ptpn22	0.820708	2.04978	0.372252	protein tyrosine phosphatase, non-receptor type 22 [Source:ZFIN;Acc:ZDB-GENE-060503-458]	30	30	protein_coding	FALSE	FALSE
ENSDARG00000016939	itgb2	0.790312	1.6825	0	integrin, beta 2 [Source:ZFIN;Acc:ZDB-GENE-110411-4]	36	50	protein_coding	TRUE	TRUE
ENSDARG00000018524	midn	0.790312	1.88505	0.0801423	midnolin [Source:ZFIN;Acc:ZDB-GENE-030131-2433]	57	56	protein_coding	FALSE	FALSE
ENSDARG00000036637	arl11	0.790312	2.95656	1.59103	ADP-ribosylation factor-like 11 [Source:ZFIN;Acc:ZDB-GENE-030131-3410]	46	44	protein_coding	FALSE	FALSE
ENSDARG00000039914	gapdhs	0.790312	2.15641	0.53846	glyceraldehyde-3-phosphate dehydrogenase, spermatogenic [Source:ZFIN;Acc:ZDB-GENE-020913-1]	75	78	protein_coding	FALSE	FALSE
ENSDARG00000098406	si.dkey.22a18.2	0.790312	1.66358	0	si:dkey-22a18.2 [Source:ZFIN;Acc:ZDB-GENE-120703-7]	8	7	protein_coding	FALSE	FALSE
ENSDARG00000068711	crfb4	0.759915	1.84645	0.00639527	cytokine receptor family member b4 [Source:ZFIN;Acc:ZDB-GENE-070905-3]	22	16	protein_coding	TRUE	TRUE
ENSDARG00000011545	arrb2b	0.729518	1.67625	0	arrestin, beta 2b [Source:ZFIN;Acc:ZDB-GENE-040426-1332]	82	82	protein_coding	FALSE	FALSE
ENSDARG00000006399	ywhae1	0.699122	2.45419	0.963473	tyrosine 3-monooxygenase/tryptophan 5-monooxygenase activation protein, epsilon polypeptide 1 [Source:ZFIN;Acc:ZDB-GENE-030131-779]	96	96	protein_coding	FALSE	FALSE
ENSDARG00000099730	pkma	0.699122	1.86828	0.0475389	pyruvate kinase, muscle, a [Source:ZFIN;Acc:ZDB-GENE-031201-4]	81	81	protein_coding	FALSE	FALSE
ENSDARG00000103138	znf1130	0.699122	2.40316	0.896273	zinc finger protein 1130 [Source:ZFIN;Acc:ZDB-GENE-131122-51]	38	41	protein_coding	FALSE	FALSE
ENSDARG00000016695	p2rx1	0.668725	1.76532	0	purinergic receptor P2X, ligand-gated ion channel, 1 [Source:ZFIN;Acc:ZDB-GENE-030319-1]	53	52	protein_coding	TRUE	FALSE
ENSDARG00000063914	mt.nd3	0.668725	2.11783	0.476426	NADH dehydrogenase 3, mitochondrial [Source:ZFIN;Acc:ZDB-GENE-011205-9]	61	57	protein_coding	TRUE	TRUE
ENSDARG00000103834	rbm14b.1	0.668725	1.59611	0	RNA binding motif protein 14b [Source:ZFIN;Acc:ZDB-GENE-040426-2455]	22	22	protein_coding	FALSE	FALSE
ENSDARG00000022684	fkbp1aa	0.638329	1.50581	0	FK506 binding protein 1Aa [Source:ZFIN;Acc:ZDB-GENE-030131-7275]	0	0	protein_coding	FALSE	FALSE
ENSDARG00000041959	cxcr4b	0.638329	1.55314	0	chemokine (C-X-C motif), receptor 4b [Source:ZFIN;Acc:ZDB-GENE-010614-1]	61	62	protein_coding	TRUE	FALSE
ENSDARG00000095426	si.dkey.12f6.1	0.607932	3.35309	2.00821	si:dkey-12f6.1 [Source:ZFIN;Acc:ZDB-GENE-091204-202]	0	0	processed_transcript	NA	NA
ENSDARG00000021124	cfl1	0.577535	2.91804	1.5448	cofilin 1 [Source:ZFIN;Acc:ZDB-GENE-030131-215]	61	75	protein_coding	FALSE	FALSE
ENSDARG00000039117	tefa	0.577535	2.01398	0.308205	thyrotrophic embryonic factor a [Source:ZFIN;Acc:ZDB-GENE-990415-264]	54	54	protein_coding	FALSE	FALSE
ENSDARG00000099978	GLCCI1..1.to.many.	0.577535	1.58092	0	glucocorticoid induced 1 [Source:HGNC Symbol;Acc:HGNC:18713]	48	49	protein_coding	FALSE	FALSE
ENSDARG00000041919	ccl38.1	0.547139	2.51157	1.04738	chemokine (C-C motif) ligand 38, duplicate 1 [Source:ZFIN;Acc:ZDB-GENE-041014-320]	0	0	protein_coding	TRUE	TRUE
ENSDARG00000097055	VPS37D	0.547139	2.20869	0.612324	si:ch211-284f22.3 [Source:ZFIN;Acc:ZDB-GENE-060526-166]	29	29	protein_coding	FALSE	FALSE
ENSDARG00000030394	prf1.1	0.516742	2.03925	0.352587	perforin 1.1 [Source:ZFIN;Acc:ZDB-GENE-111212-2]	34	36	protein_coding	FALSE	TRUE
ENSDARG00000061845	si.dkeyp.110e4.6	0.516742	2.9997	1.63886	si:dkeyp-110e4.6 [Source:ZFIN;Acc:ZDB-GENE-030219-75]	0	0	protein_coding	TRUE	FALSE
ENSDARG00000101828	si.dkey.16p6.1.37	0.516742	2.10797	0.462861	si:dkey-16p6.1 [Source:ZFIN;Acc:ZDB-GENE-081103-43]	0	0	protein_coding	FALSE	FALSE
ENSDARG00000082753	AC024175.17	0.486346	2.5296	1.0714		0	0	Mt_rRNA	NA	NA
ENSDARG00000099465	RNF213..1.to.many.	0.486346	2.06928	0.400757	ring finger protein 213 [Source:HGNC Symbol;Acc:HGNC:14539]	43	43	protein_coding	FALSE	FALSE
ENSDARG00000104300	wipf1a	0.486346	2.13321	0.500425	WAS/WASL interacting protein family, member 1a [Source:ZFIN;Acc:ZDB-GENE-080204-101]	0	0	protein_coding	FALSE	FALSE
ENSDARG00000010384	lpar5a	0.455949	1.56901	0	lysophosphatidic acid receptor 5a [Source:ZFIN;Acc:ZDB-GENE-030131-1193]	33	33	protein_coding	TRUE	FALSE
ENSDARG00000037506	prps1b	0.455949	1.50686	0	phosphoribosyl pyrophosphate synthetase 1B [Source:ZFIN;Acc:ZDB-GENE-030131-4011]	97	93	protein_coding	FALSE	FALSE
ENSDARG00000015149	wasa	0.425552	1.61561	0	Wiskott-Aldrich syndrome (eczema-thrombocytopenia) a [Source:ZFIN;Acc:ZDB-GENE-081104-419]	34	34	protein_coding	FALSE	FALSE
ENSDARG00000075650	dscr3	0.425552	2.58337	1.14231	Down syndrome critical region 3 [Source:ZFIN;Acc:ZDB-GENE-040801-6]	76	77	protein_coding	FALSE	FALSE
ENSDARG00000078191	zbtb46	0.425552	2.2754	0.708535	zinc finger and BTB domain containing 46 [Source:ZFIN;Acc:ZDB-GENE-090313-352]	65	65	protein_coding	FALSE	FALSE
ENSDARG00000097337	si.ch211.256e16.5	0.425552	1.77494	0	si:ch211-256e16.5 [Source:ZFIN;Acc:ZDB-GENE-131126-25]	0	0	sense_intronic	NA	NA
ENSDARG00000101340	CST7	0.425552	2.42737	0.927184	cystatin F [Source:HGNC Symbol;Acc:HGNC:2479]	37	38	protein_coding	FALSE	TRUE
ENSDARG00000004473	tbx21	0.395156	2.19222	0.585327	T-box 21 [Source:ZFIN;Acc:ZDB-GENE-080104-3]	41	41	protein_coding	FALSE	FALSE
ENSDARG00000006420	atrnl1b	0.395156	1.88882	0.0861449	attractin-like 1b [Source:ZFIN;Acc:ZDB-GENE-030131-8092]	75	74	protein_coding	TRUE	TRUE
ENSDARG00000008867	rap1b	0.395156	1.51296	0	RAP1B, member of RAS oncogene family [Source:ZFIN;Acc:ZDB-GENE-030131-9662]	96	95	protein_coding	FALSE	FALSE
ENSDARG00000060767	smg7	0.395156	1.52717	0	SMG7 nonsense mediated mRNA decay factor [Source:ZFIN;Acc:ZDB-GENE-030131-9122]	62	60	protein_coding	FALSE	FALSE
ENSDARG00000068233	CD53	0.395156	1.75997	0	zgc:64051 [Source:ZFIN;Acc:ZDB-GENE-040426-1349]	38	39	protein_coding	TRUE	FALSE
ENSDARG00000092421	si.ch1073.394i4.1	0.395156	1.91229	0.130223	si:ch1073-394i4.1 [Source:ZFIN;Acc:ZDB-GENE-100922-74]	0	0	protein_coding	TRUE	TRUE
ENSDARG00000101766	ptmab	0.395156	2.41512	0.912497	prothymosin, alpha b [Source:ZFIN;Acc:ZDB-GENE-030131-8681]	0	0	protein_coding	FALSE	FALSE
ENSDARG00000014274	rfc2	0.364759	2.58154	1.14088	replication factor C (activator 1) 2 [Source:ZFIN;Acc:ZDB-GENE-050306-29]	77	77	protein_coding	FALSE	TRUE
ENSDARG00000028386	htatip2	0.364759	1.71874	0	HIV-1 Tat interactive protein 2 [Source:ZFIN;Acc:ZDB-GENE-001219-1]	64	64	protein_coding	FALSE	FALSE
ENSDARG00000094448	si.dkey.12f6.2	0.364759	3.01801	1.66083	si:dkey-12f6.2 [Source:ZFIN;Acc:ZDB-GENE-091204-126]	0	0	processed_transcript	NA	NA
ENSDARG00000099418	BX649198.1	0.364759	1.68794	0		0	0	protein_coding	FALSE	FALSE
ENSDARG00000000796	nr4a1	0.334363	1.96116	0.220913	nuclear receptor subfamily 4, group A, member 1 [Source:ZFIN;Acc:ZDB-GENE-040704-11]	57	58	protein_coding	FALSE	FALSE
ENSDARG00000043555	tmem30ab	0.334363	1.75071	0	transmembrane protein 30Ab [Source:ZFIN;Acc:ZDB-GENE-030131-5884]	69	70	protein_coding	TRUE	FALSE
ENSDARG00000058647	hck	0.334363	1.80631	0	HCK proto-oncogene, Src family tyrosine kinase [Source:ZFIN;Acc:ZDB-GENE-090313-72]	75	76	protein_coding	FALSE	FALSE
ENSDARG00000062972	hip1	0.334363	2.82478	1.44689	huntingtin interacting protein 1 [Source:ZFIN;Acc:ZDB-GENE-010328-15]	66	67	protein_coding	FALSE	FALSE
ENSDARG00000070452	saraf	0.334363	3.29043	1.94823	store-operated calcium entry-associated regulatory factor [Source:ZFIN;Acc:ZDB-GENE-060929-208]	38	40	protein_coding	TRUE	TRUE
ENSDARG00000079517	nitr1f	0.334363	2.65445	1.23438	novel immune-type receptor 1f [Source:EntrezGene;Acc:492323]	0	0	protein_coding	TRUE	TRUE
ENSDARG00000024195	znf395b	0.303966	3.48949	2.1373	zinc finger protein 395b [Source:ZFIN;Acc:ZDB-GENE-041001-193]	42	42	protein_coding	FALSE	FALSE
ENSDARG00000027009	zgc.85777	0.273569	2.13224	0.499329	zgc:85777 [Source:ZFIN;Acc:ZDB-GENE-040426-2210]	0	0	protein_coding	FALSE	FALSE
ENSDARG00000076814	si.ch211.165b19.9	0.273569	1.85205	0.017812	si:ch211-165b19.9 [Source:ZFIN;Acc:ZDB-GENE-070912-136]	0	0	protein_coding	FALSE	FALSE
ENSDARG00000003910	med13b	0.243173	1.5407	0	mediator complex subunit 13b [Source:ZFIN;Acc:ZDB-GENE-030131-3529]	66	66	protein_coding	FALSE	FALSE
ENSDARG00000021372	tob1b	0.243173	1.67644	0	transducer of ERBB2, 1b [Source:ZFIN;Acc:ZDB-GENE-040426-2151]	82	83	protein_coding	FALSE	FALSE
ENSDARG00000040901	si.dkey.11d18.4	0.243173	3.46994	2.11982	si:dkey-11d18.4 [Source:ZFIN;Acc:ZDB-GENE-091204-474]	0	0	protein_coding	TRUE	FALSE
ENSDARG00000044820	cstf1	0.243173	2.81504	1.43242	cleavage stimulation factor, 3' pre-RNA, subunit 1 [Source:ZFIN;Acc:ZDB-GENE-030131-2958]	90	90	protein_coding	FALSE	FALSE
ENSDARG00000094958	si.ch211.222e20.5	0.243173	2.96836	1.60222	si:ch211-222e20.5 [Source:ZFIN;Acc:ZDB-GENE-091118-15]	0	0	processed_transcript	NA	NA
ENSDARG00000069090	atp6v0d1	0.212776	1.9234	0.152745	ATPase, H+ transporting, lysosomal V0 subunit d1 [Source:ZFIN;Acc:ZDB-GENE-030131-1531]	94	94	protein_coding	FALSE	FALSE
ENSDARG00000105377	si.ch211.277c7.6	0.212776	3.37482	2.03526	si:ch211-277c7.6 [Source:ZFIN;Acc:ZDB-GENE-160114-45]	NA	NA	protein_coding	NA	NA
ENSDARG00000068018	CU672228.1	0.18238	2.42401	0.924304		0	0	protein_coding	FALSE	FALSE
ENSDARG00000069773	nitr1o	0.18238	1.83383	0	novel immune-type receptor 1o [Source:EntrezGene;Acc:170968]	0	0	protein_coding	TRUE	TRUE
ENSDARG00000079632	POLD4	0.18238	1.57015	0	si:dkey-28b4.7 [Source:ZFIN;Acc:ZDB-GENE-050506-118]	37	38	protein_coding	FALSE	FALSE
ENSDARG00000089259	prf1.8	0.18238	1.64055	0	perforin 1.8 [Source:ZFIN;Acc:ZDB-GENE-111212-12]	35	35	protein_coding	FALSE	TRUE
ENSDARG00000059404	rab43	0.151983	2.0215	0.321025	RAB43, member RAS oncogene family [Source:ZFIN;Acc:ZDB-GENE-060825-25]	71	72	protein_coding	FALSE	FALSE
ENSDARG00000012981	osbpl7	0.121586	1.55162	0	oxysterol binding protein-like 7 [Source:ZFIN;Acc:ZDB-GENE-041010-212]	43	42	protein_coding	FALSE	FALSE
ENSDARG00000104508	slc10a7	0.121586	1.50582	0	solute carrier family 10, member 7 [Source:ZFIN;Acc:ZDB-GENE-040801-5]	75	76	protein_coding	TRUE	FALSE
ENSDARG00000053194	pdzd11	0.0911898	1.8731	0.0572477	PDZ domain containing 11 [Source:ZFIN;Acc:ZDB-GENE-040426-2544]	86	88	protein_coding	FALSE	FALSE
ENSDARG00000088124	adrb2a	0.0911898	2.14383	0.517405	adrenoceptor beta 2, surface a [Source:ZFIN;Acc:ZDB-GENE-100414-3]	53	54	protein_coding	TRUE	FALSE
ENSDARG00000104640	BX511034.6	0.0911898	1.55976	0		0	0	protein_coding	TRUE	FALSE
ENSDARG00000028507	itgb4	0.0607932	1.55655	0	integrin, beta 4 [Source:ZFIN;Acc:ZDB-GENE-030131-7209]	50	50	protein_coding	TRUE	TRUE
ENSDARG00000046091	si.ch211.283g2.1	0.0607932	1.77017	0	si:ch211-283g2.1 [Source:ZFIN;Acc:ZDB-GENE-060531-57]	0	0	protein_coding	TRUE	FALSE
ENSDARG00000051934	kxd1	0.0607932	1.6719	0	KxDL motif containing 1 [Source:ZFIN;Acc:ZDB-GENE-040801-207]	61	61	protein_coding	FALSE	FALSE
ENSDARG00000087631	nitr1m	0.0607932	1.92605	0.157318	novel immune-type receptor 1m [Source:ZFIN;Acc:ZDB-GENE-020225-5]	0	0	protein_coding	TRUE	TRUE
ENSDARG00000089383	il1fma	0.0607932	1.52762	0	interleukin-1 family member A [Source:ZFIN;Acc:ZDB-GENE-140106-231]	0	0	protein_coding	FALSE	FALSE
ENSDARG00000099547	nbeal1	0.0607932	2.18915	0.580361	neurobeachin-like 1 [Source:ZFIN;Acc:ZDB-GENE-130530-544]	66	66	protein_coding	FALSE	FALSE
ENSDARG00000103079	si.dkey.220o21.3	0.0607932	1.68159	0	si:dkey-220o21.3 [Source:ZFIN;Acc:ZDB-GENE-110914-75]	0	0	protein_coding	FALSE	FALSE
ENSDARG00000003520	tbc1d14	0.0303966	2.29043	0.731095	TBC1 domain family, member 14 [Source:ZFIN;Acc:ZDB-GENE-030131-6136]	62	62	protein_coding	FALSE	FALSE
ENSDARG00000034598	CABZ01029900.1	0.0303966	2.26464	0.695815		0	0	protein_coding	FALSE	FALSE
ENSDARG00000040854	tsg101a	0.0303966	2.10225	0.45658	tumor susceptibility 101a [Source:ZFIN;Acc:ZDB-GENE-030217-1]	82	84	protein_coding	FALSE	FALSE
ENSDARG00000045979	PTGDS..1.to.many.	0.0303966	1.64868	0	zgc:153704 [Source:ZFIN;Acc:ZDB-GENE-060929-1114]	0	19	protein_coding	TRUE	TRUE
ENSDARG00000054950	eef2kmt	0.0303966	1.50581	0	eukaryotic elongation factor 2 lysine methyltransferase [Source:ZFIN;Acc:ZDB-GENE-041010-160]	44	14	protein_coding	FALSE	FALSE
ENSDARG00000068681	crfb1	0.0303966	1.87612	0.0613436	cytokine receptor family member b1 [Source:ZFIN;Acc:ZDB-GENE-030131-8673]	0	0	protein_coding	TRUE	FALSE
ENSDARG00000075192	yme1l1a	0.0303966	1.60633	0	YME1-like 1a [Source:ZFIN;Acc:ZDB-GENE-091113-41]	72	71	protein_coding	FALSE	FALSE
ENSDARG00000086416	med11	0.0303966	1.9395	0.183733	mediator complex subunit 11 [Source:ZFIN;Acc:ZDB-GENE-091207-2]	51	51	protein_coding	FALSE	FALSE
ENSDARG00000088612	si.ch211.153b23.7	0.0303966	2.19492	0.590005	si:ch211-153b23.7 [Source:ZFIN;Acc:ZDB-GENE-141216-14]	0	0	protein_coding	FALSE	FALSE
ENSDARG00000091652	xrn1	0.0303966	1.63594	0	5'-3' exoribonuclease 1 [Source:ZFIN;Acc:ZDB-GENE-040426-1203]	64	64	protein_coding	FALSE	FALSE
ENSDARG00000096545	si.ch211.191a16.5	0.0303966	1.60918	0	si:ch211-191a16.5 [Source:ZFIN;Acc:ZDB-GENE-121214-56]	0	0	protein_coding	FALSE	FALSE
ENSDARG00000008697	epas1a	7.75113	0.970846	0	endothelial PAS domain protein 1a [Source:ZFIN;Acc:ZDB-GENE-030131-4490]	57	58	protein_coding	FALSE	FALSE
ENSDARG00000009657	fgfr1op2	7.38637	1.33697	0	FGFR1 oncogene partner 2 [Source:ZFIN;Acc:ZDB-GENE-030131-7451]	76	76	protein_coding	FALSE	FALSE
ENSDARG00000007141	psmc3	7.32558	1.47535	0	proteasome 26S subunit, ATPase 3 [Source:ZFIN;Acc:ZDB-GENE-030131-666]	97	96	protein_coding	FALSE	FALSE
ENSDARG00000034777	txn2	7.20399	1.44072	0	thioredoxin 2 [Source:ZFIN;Acc:ZDB-GENE-040426-1795]	55	57	protein_coding	FALSE	FALSE
ENSDARG00000007241	mycb	7.02161	1.26094	0	v-myc avian myelocytomatosis viral oncogene homolog b [Source:ZFIN;Acc:ZDB-GENE-040426-780]	60	60	protein_coding	FALSE	FALSE
ENSDARG00000014717	DYNC1H1	6.96082	1.45872	0	dynein, cytoplasmic 1, heavy chain 1 [Source:HGNC Symbol;Acc:HGNC:2961]	2	0	protein_coding	FALSE	FALSE
ENSDARG00000101388	si.ch211.171l17.14	6.96082	1.13697	0	si:ch211-171l17.14 [Source:ZFIN;Acc:ZDB-GENE-070912-153]	0	0	protein_coding	FALSE	FALSE
ENSDARG00000059029	mmp28	6.86963	0.717692	0	matrix metallopeptidase 28 [Source:ZFIN;Acc:ZDB-GENE-100226-1]	52	51	protein_coding	FALSE	TRUE
ENSDARG00000105100	si.dkey.3h2.2	6.86963	1.09645	0	si:dkey-3h2.2 [Source:ZFIN;Acc:ZDB-GENE-070705-464]	8	7	protein_coding	FALSE	FALSE
ENSDARG00000053884	med13a	6.83923	1.11649	0	mediator complex subunit 13a [Source:ZFIN;Acc:ZDB-GENE-070627-13]	69	69	protein_coding	FALSE	FALSE
ENSDARG00000063713	syngap1a	6.65686	1.29734	0	synaptic Ras GTPase activating protein 1a [Source:ZFIN;Acc:ZDB-GENE-060503-370]	64	64	protein_coding	FALSE	FALSE
ENSDARG00000098836	myocd	6.65686	0.687442	0	myocardin [Source:ZFIN;Acc:ZDB-GENE-121214-328]	37	38	protein_coding	FALSE	FALSE
ENSDARG00000077828	slc29a3	6.53527	0.540228	0	solute carrier family 29 (equilibrative nucleoside transporter), member 3 [Source:ZFIN;Acc:ZDB-GENE-081107-66]	54	56	protein_coding	TRUE	FALSE
ENSDARG00000018534	slc6a9	6.38329	0.793989	0	solute carrier family 6 (neurotransmitter transporter, glycine), member 9 [Source:ZFIN;Acc:ZDB-GENE-050105-3]	75	75	protein_coding	TRUE	FALSE
ENSDARG00000101208	FO704710.3	6.35289	0.60477	0		0	0	protein_coding	FALSE	FALSE
ENSDARG00000091885	grnas	6.2921	0.626512	0	granulin antisense [Source:ZFIN;Acc:ZDB-GENE-060104-1]	0	0	antisense	NA	NA
ENSDARG00000071458	si.dkey.121a11.3	6.04892	0.810944	0	si:dkey-121a11.3 [Source:ZFIN;Acc:ZDB-GENE-050208-417]	19	24	protein_coding	FALSE	FALSE
ENSDARG00000091304	card19	6.04892	1.0774	0	caspase recruitment domain family, member 19 [Source:ZFIN;Acc:ZDB-GENE-041008-5]	35	37	protein_coding	FALSE	FALSE
ENSDARG00000099585	si.dkeyp.4c4.2	6.04892	1.37093	0	si:dkeyp-4c4.2 [Source:ZFIN;Acc:ZDB-GENE-130530-1]	8	8	protein_coding	FALSE	FALSE
ENSDARG00000104836	myom1b	5.71456	0.719567	0	myomesin 1b [Source:ZFIN;Acc:ZDB-GENE-080416-2]	58	58	protein_coding	FALSE	FALSE
ENSDARG00000102432	si.dkey.261j11.3	5.68416	0.865762	0	si:dkey-261j11.3 [Source:ZFIN;Acc:ZDB-GENE-131122-1]	0	0	protein_coding	FALSE	FALSE
ENSDARG00000093263	TRIM29..1.to.many..7	5.62337	1.41863	0	tripartite motif containing 29 [Source:HGNC Symbol;Acc:HGNC:17274]	0	0	protein_coding	FALSE	FALSE
ENSDARG00000105437	si.dkey.14f19.6	5.62337	0.913654	0	si:dkey-14f19.6 [Source:ZFIN;Acc:ZDB-GENE-160114-11]	NA	NA	antisense	NA	NA
ENSDARG00000101469	RNH1..1.to.many..22	5.13703	0.44157	0	si:dkey-56m15.2 [Source:ZFIN;Acc:ZDB-GENE-110913-122]	0	0	protein_coding	FALSE	FALSE
ENSDARG00000057826	si.ch73.61d6.3	5.04584	0.689044	0	si:ch73-61d6.3 [Source:ZFIN;Acc:ZDB-GENE-091204-109]	0	0	protein_coding	TRUE	FALSE
ENSDARG00000094571	arl11l	5.04584	0.79416	0	ADP-ribosylation factor-like 11, like [Source:ZFIN;Acc:ZDB-GENE-091204-415]	0	0	processed_transcript	NA	NA
ENSDARG00000090192	si.dkey.16p6.1.7	4.68108	0.331694	0	si:dkey-16p6.1 [Source:ZFIN;Acc:ZDB-GENE-081103-43]	0	0	protein_coding	FALSE	FALSE
ENSDARG00000095670	si.dkey.262g12.4	3.86037	1.30195	0	si:dkey-262g12.4 [Source:ZFIN;Acc:ZDB-GENE-070705-433]	0	0	processed_transcript	NA	NA
ENSDARG00000093476	si.dkey.175d9.2.1	3.79957	1.25253	0	si:dkey-175d9.2 [Source:ZFIN;Acc:ZDB-GENE-131119-97]	0	0	protein_coding	FALSE	FALSE
ENSDARG00000099112	si.dkey.71l4.3	3.70839	1.17911	0	si:dkey-71l4.3 [Source:ZFIN;Acc:ZDB-GENE-120703-25]	0	0	protein_coding	FALSE	FALSE
ENSDARG00000098515	si.dkey.16p6.1.26	3.5868	0.883007	0	si:dkey-16p6.1 [Source:ZFIN;Acc:ZDB-GENE-081103-43]	0	0	protein_coding	FALSE	FALSE
ENSDARG00000099825	si.dkey.16p6.1.20	3.52601	0.614457	0	si:dkey-16p6.1 [Source:ZFIN;Acc:ZDB-GENE-081103-43]	0	0	protein_coding	FALSE	FALSE
ENSDARG00000092633	si.dkey.193h7.5	2.91807	0.981145	0	si:dkey-193h7.5 [Source:ZFIN;Acc:ZDB-GENE-060531-83]	0	0	processed_transcript	NA	NA
ENSDARG00000102726	si.dkey.263m6.6	2.6749	1.42908	0	si:dkey-263m6.6 [Source:ZFIN;Acc:ZDB-GENE-141222-79]	0	0	processed_transcript	NA	NA
ENSDARG00000092963	si.dkeyp.27b10.1	2.43173	0.652554	0	si:dkeyp-27b10.1 [Source:ZFIN;Acc:ZDB-GENE-050420-281]	0	0	processed_transcript	NA	NA
ENSDARG00000099999	tcf3b	2.37093	1.32102	0	transcription factor 3b [Source:ZFIN;Acc:ZDB-GENE-051113-64]	54	56	protein_coding	FALSE	FALSE
ENSDARG00000094494	CR926879.1	2.31014	0.279211	0		0	0	protein_coding	TRUE	TRUE
ENSDARG00000077240	cd247-like	2.18856	1.2302	0	CD247 antigen like [Source:ZFIN;Acc:ZDB-GENE-070508-2]	26	27	protein_coding	TRUE	TRUE
ENSDARG00000016058	fibpa	1.763	1.43264	0	fibroblast growth factor (acidic) intracellular binding protein a [Source:ZFIN;Acc:ZDB-GENE-040426-1363]	72	73	protein_coding	FALSE	FALSE
ENSDARG00000099555	foxo1a	1.64142	1.22218	0	forkhead box O1 a [Source:ZFIN;Acc:ZDB-GENE-061013-59]	58	59	protein_coding	FALSE	FALSE
ENSDARG00000104026	si.dkeyp.35e5.5	1.64142	0.93318	0	si:dkeyp-35e5.5 [Source:ZFIN;Acc:ZDB-GENE-050420-335]	8	7	protein_coding	FALSE	FALSE
ENSDARG00000036924	TATDN1	1.61102	1.42289	0	TatD DNase domain containing 1 [Source:HGNC Symbol;Acc:HGNC:24220]	61	67	protein_coding	FALSE	FALSE
ENSDARG00000099663	cox5ab	1.45904	1.21275	0	cytochrome c oxidase subunit Vab [Source:ZFIN;Acc:ZDB-GENE-030131-5162]	74	73	protein_coding	FALSE	FALSE
ENSDARG00000069013	prdx4	1.42864	1.13534	0	peroxiredoxin 4 [Source:ZFIN;Acc:ZDB-GENE-030131-1096]	79	78	protein_coding	FALSE	TRUE
ENSDARG00000078092	limd2	1.39824	0.812039	0	LIM domain containing 2 [Source:ZFIN;Acc:ZDB-GENE-120906-1]	73	74	protein_coding	FALSE	FALSE
ENSDARG00000061282	glg1a	1.36785	1.41885	0	golgi glycoprotein 1a [Source:ZFIN;Acc:ZDB-GENE-030131-6448]	76	76	protein_coding	TRUE	TRUE
ENSDARG00000068638	lpar5b	1.36785	1.48316	0	lysophosphatidic acid receptor 5b [Source:ZFIN;Acc:ZDB-GENE-081022-116]	0	0	protein_coding	TRUE	FALSE
ENSDARG00000079639	PRRC2B	1.30705	1.38525	0	proline-rich coiled-coil 2B [Source:HGNC Symbol;Acc:HGNC:28121]	48	49	protein_coding	FALSE	FALSE
ENSDARG00000053311	tespa1	1.27666	1.33569	0	thymocyte expressed, positive selection associated 1 [Source:ZFIN;Acc:ZDB-GENE-120727-10]	24	24	protein_coding	FALSE	FALSE
ENSDARG00000104084	GPRIN2	1.27666	0.189274	0	si:dkey-191g9.7 [Source:ZFIN;Acc:ZDB-GENE-141216-135]	23	22	protein_coding	FALSE	FALSE
ENSDARG00000008097	srsf9	1.24626	0.861291	0	serine/arginine-rich splicing factor 9 [Source:ZFIN;Acc:ZDB-GENE-040426-2397]	64	64	protein_coding	FALSE	FALSE
ENSDARG00000017841	cand1	1.24626	1.11115	0	cullin-associated and neddylation-dissociated 1 [Source:ZFIN;Acc:ZDB-GENE-040426-2872]	94	94	protein_coding	FALSE	FALSE
ENSDARG00000042667	klf2a	1.24626	1.28728	0	Kruppel-like factor 2a [Source:ZFIN;Acc:ZDB-GENE-011109-1]	45	44	protein_coding	FALSE	FALSE
ENSDARG00000058044	rab1ba	1.24626	0.170166	0	zRAB1B, member RAS oncogene family a [Source:ZFIN;Acc:ZDB-GENE-040426-873]	0	0	protein_coding	FALSE	FALSE
ENSDARG00000076283	snrpd3l	1.24626	1.12536	0	small nuclear ribonucleoprotein D3 polypeptide, like [Source:ZFIN;Acc:ZDB-GENE-030131-5219]	96	96	protein_coding	FALSE	FALSE
ENSDARG00000021241	zgc.165604	1.21586	0.903544	0	zgc:165604 [Source:ZFIN;Acc:ZDB-GENE-070615-34]	0	0	protein_coding	TRUE	TRUE
ENSDARG00000039490	pitpnaa	1.18547	1.46542	0	phosphatidylinositol transfer protein, alpha a [Source:ZFIN;Acc:ZDB-GENE-040426-744]	79	79	protein_coding	FALSE	FALSE
ENSDARG00000057513	mdm4	1.18547	1.45217	0	MDM4, p53 regulator [Source:ZFIN;Acc:ZDB-GENE-030131-6872]	45	48	protein_coding	FALSE	FALSE
ENSDARG00000004836	dnajc5ab	1.15507	1.03808	0	DnaJ (Hsp40) homolog, subfamily C, member 5ab [Source:ZFIN;Acc:ZDB-GENE-081021-2]	77	78	protein_coding	FALSE	FALSE
ENSDARG00000012684	atp2b1a	1.15507	1.09997	0	ATPase, Ca++ transporting, plasma membrane 1a [Source:ZFIN;Acc:ZDB-GENE-030925-29]	85	85	protein_coding	TRUE	FALSE
ENSDARG00000041397	eif2b2	1.15507	0.930737	0	eukaryotic translation initiation factor 2B, subunit 2 beta [Source:ZFIN;Acc:ZDB-GENE-040426-2605]	79	80	protein_coding	FALSE	FALSE
ENSDARG00000060954	tmcc1b	1.15507	1.45143	0	transmembrane and coiled-coil domain family 1b [Source:ZFIN;Acc:ZDB-GENE-061013-154]	66	67	protein_coding	TRUE	FALSE
ENSDARG00000070485	apitd1	1.15507	0.541678	0	apoptosis-inducing, TAF9-like domain 1 [Source:ZFIN;Acc:ZDB-GENE-080723-52]	53	46	protein_coding	FALSE	FALSE
ENSDARG00000074222	rap1gap2b	1.15507	1.32318	0	RAP1 GTPase activating protein 2b [Source:ZFIN;Acc:ZDB-GENE-080722-11]	61	64	protein_coding	FALSE	FALSE
ENSDARG00000086490	SUN2	1.15507	0.950226	0	si:dkey-92f12.2 [Source:ZFIN;Acc:ZDB-GENE-091204-379]	33	34	protein_coding	TRUE	FALSE
ENSDARG00000097106	si.dkey.245m3.2	1.15507	1.0149	0	si:dkey-245m3.2 [Source:ZFIN;Acc:ZDB-GENE-070705-413]	0	0	processed_transcript	NA	NA
ENSDARG00000100275	NMI	1.15507	0.317582	0	N-myc and STAT interactor [Source:HGNC Symbol;Acc:HGNC:7854]	24	25	protein_coding	FALSE	FALSE
ENSDARG00000100349	prkacaa	1.15507	1.43513	0	protein kinase, cAMP-dependent, catalytic, alpha, genome duplicate a [Source:ZFIN;Acc:ZDB-GENE-050114-6]	93	94	protein_coding	FALSE	FALSE
ENSDARG00000013122	maf1	1.12467	1.03706	0	MAF1 homolog, negative regulator of RNA polymerase III [Source:ZFIN;Acc:ZDB-GENE-040426-2788]	0	0	protein_coding	FALSE	FALSE
ENSDARG00000013990	ube2q2	1.12467	1.3614	0	ubiquitin-conjugating enzyme E2Q family member 2 [Source:ZFIN;Acc:ZDB-GENE-040426-1919]	83	83	protein_coding	TRUE	FALSE
ENSDARG00000030006	SLC6A7	1.12467	1.38255	0	zgc:158225 [Source:ZFIN;Acc:ZDB-GENE-070112-1492]	44	44	protein_coding	TRUE	FALSE
ENSDARG00000075616	polr2k	1.12467	0.77467	0	polymerase (RNA) II (DNA directed) polypeptide K [Source:ZFIN;Acc:ZDB-GENE-070820-18]	95	95	protein_coding	FALSE	FALSE
ENSDARG00000076889	ralgapa1	1.12467	0.881517	0	Ral GTPase activating protein, alpha subunit 1 (catalytic) [Source:ZFIN;Acc:ZDB-GENE-080806-1]	70	73	protein_coding	FALSE	FALSE
ENSDARG00000039850	dusp22b	1.09428	0.894165	0	dual specificity phosphatase 22b [Source:ZFIN;Acc:ZDB-GENE-050417-257]	61	62	protein_coding	FALSE	FALSE
ENSDARG00000052113	hexa	1.09428	1.10447	0	hexosaminidase A (alpha polypeptide) [Source:ZFIN;Acc:ZDB-GENE-050417-283]	54	19	protein_coding	FALSE	TRUE
ENSDARG00000053864	elmsan1b	1.09428	1.4246	0	ELM2 and Myb/SANT-like domain containing 1b [Source:ZFIN;Acc:ZDB-GENE-131121-13]	32	31	protein_coding	FALSE	FALSE
ENSDARG00000099312	hn1b	1.09428	1.39191	0	hematological and neurological expressed 1b [Source:ZFIN;Acc:ZDB-GENE-030131-2784]	41	31	protein_coding	FALSE	FALSE
ENSDARG00000100333	FO818712.1	1.09428	0.180679	0		0	0	protein_coding	FALSE	FALSE
ENSDARG00000012458	zgc.77849	1.06388	1.35823	0	zgc:77849 [Source:ZFIN;Acc:ZDB-GENE-030131-1107]	0	0	protein_coding	FALSE	FALSE
ENSDARG00000021242	mvp	1.06388	1.41385	0	major vault protein [Source:ZFIN;Acc:ZDB-GENE-030826-33]	68	68	protein_coding	FALSE	FALSE
ENSDARG00000029474	camk1b	1.06388	0.957851	0	calcium/calmodulin-dependent protein kinase Ib [Source:ZFIN;Acc:ZDB-GENE-141014-1]	77	76	protein_coding	FALSE	FALSE
ENSDARG00000007257	rab5ab	1.03348	0.947911	0	RAB5A, member RAS oncogene family, b [Source:ZFIN;Acc:ZDB-GENE-040122-3]	93	92	protein_coding	FALSE	FALSE
ENSDARG00000033042	ptprja	1.03348	1.38197	0	protein tyrosine phosphatase, receptor type, J a [Source:ZFIN;Acc:ZDB-GENE-030131-8301]	24	25	protein_coding	TRUE	TRUE
ENSDARG00000077405	PSIP1..1.to.many.	1.03348	1.09422	0	si:ch211-116m6.3 [Source:ZFIN;Acc:ZDB-GENE-030131-3273]	9	9	protein_coding	FALSE	FALSE
ENSDARG00000012519	hcfc1b	1.00309	0.856117	0	host cell factor C1b [Source:ZFIN;Acc:ZDB-GENE-030131-2411]	67	66	protein_coding	FALSE	FALSE
ENSDARG00000021455	strbp	1.00309	1.00177	0	spermatid perinuclear RNA binding protein [Source:ZFIN;Acc:ZDB-GENE-030729-18]	70	70	protein_coding	FALSE	TRUE
ENSDARG00000031302	smap1	1.00309	0.997041	0	small ArfGAP 1 [Source:ZFIN;Acc:ZDB-GENE-060920-2]	57	59	protein_coding	FALSE	FALSE
ENSDARG00000032802	ktn1	1.00309	1.04554	0	kinectin 1 [Source:ZFIN;Acc:ZDB-GENE-030408-4]	39	40	protein_coding	TRUE	FALSE
ENSDARG00000043019	exoc1	1.00309	0.99504	0	exocyst complex component 1 [Source:ZFIN;Acc:ZDB-GENE-030131-1057]	85	85	protein_coding	FALSE	FALSE
ENSDARG00000045224	glipr1a	1.00309	1.28054	0	GLI pathogenesis-related 1a [Source:ZFIN;Acc:ZDB-GENE-110309-2]	30	36	protein_coding	TRUE	TRUE
ENSDARG00000045681	irf5	1.00309	1.39407	0	interferon regulatory factor 5 [Source:ZFIN;Acc:ZDB-GENE-040426-2587]	46	45	protein_coding	FALSE	FALSE
ENSDARG00000045928	psma4	1.00309	1.1192	0	proteasome subunit alpha 4 [Source:ZFIN;Acc:ZDB-GENE-040426-1932]	96	96	protein_coding	FALSE	FALSE
ENSDARG00000054191	pgk1	1.00309	1.49463	0	phosphoglycerate kinase 1 [Source:ZFIN;Acc:ZDB-GENE-040426-2711]	88	88	protein_coding	FALSE	FALSE
ENSDARG00000055276	rel	1.00309	1.30819	0	v-rel avian reticuloendotheliosis viral oncogene homolog [Source:ZFIN;Acc:ZDB-GENE-040718-255]	43	43	protein_coding	FALSE	FALSE
ENSDARG00000098167	si.dkey.176f19.4	1.00309	-0.222563	0	si:dkey-176f19.4 [Source:ZFIN;Acc:ZDB-GENE-110913-20]	10	9	protein_coding	FALSE	FALSE
ENSDARG00000099519	zgc.66475	1.00309	0.0342886	0	zgc:66475 [Source:ZFIN;Acc:ZDB-GENE-040426-1644]	0	0	protein_coding	FALSE	FALSE
ENSDARG00000023920	llgl2	0.972691	1.48694	0	lethal giant larvae homolog 2 (Drosophila) [Source:ZFIN;Acc:ZDB-GENE-030131-9877]	65	65	protein_coding	FALSE	FALSE
ENSDARG00000052994	slc25a28	0.972691	0.223826	0	solute carrier family 25 (mitochondrial iron transporter), member 28 [Source:ZFIN;Acc:ZDB-GENE-040426-2125]	63	64	protein_coding	FALSE	FALSE
ENSDARG00000053956	sptbn2	0.972691	1.04509	0	spectrin, beta, non-erythrocytic 2 [Source:ZFIN;Acc:ZDB-GENE-030131-787]	67	66	protein_coding	FALSE	FALSE
ENSDARG00000100743	si.dkey.190j3.4.1	0.972691	1.43776	0	si:dkey-190j3.4 [Source:ZFIN;Acc:ZDB-GENE-070424-218]	8	8	protein_coding	FALSE	FALSE
ENSDARG00000101668	si.dkey.161l11.5	0.972691	0.431786	0	si:dkey-161l11.5 [Source:ZFIN;Acc:ZDB-GENE-141222-104]	0	0	processed_transcript	NA	NA
ENSDARG00000103095	tbk1	0.972691	1.41897	0	TANK-binding kinase 1 [Source:ZFIN;Acc:ZDB-GENE-060512-359]	71	72	protein_coding	FALSE	FALSE
ENSDARG00000015050	calm3a	0.942295	1.25631	0	calmodulin 3a (phosphorylase kinase, delta) [Source:ZFIN;Acc:ZDB-GENE-030131-5590]	100	0	protein_coding	FALSE	FALSE
ENSDARG00000037965	srrm2	0.942295	1.15954	0	serine/arginine repetitive matrix 2 [Source:ZFIN;Acc:ZDB-GENE-050522-399]	25	32	protein_coding	FALSE	FALSE
ENSDARG00000056085	mob4	0.942295	0.963404	0	MOB family member 4, phocein [Source:ZFIN;Acc:ZDB-GENE-040801-174]	93	93	protein_coding	FALSE	FALSE
ENSDARG00000070981	ash1l	0.942295	1.01592	0	ash1 (absent, small, or homeotic)-like (Drosophila) [Source:ZFIN;Acc:ZDB-GENE-030131-6101]	47	48	protein_coding	FALSE	FALSE
ENSDARG00000076451	prdm2b	0.942295	1.29704	0	PR domain containing 2, with ZNF domain b [Source:ZFIN;Acc:ZDB-GENE-080613-3]	40	40	protein_coding	FALSE	FALSE
ENSDARG00000079645	sc.d217	0.942295	1.08309	0	sc:d217 [Source:ZFIN;Acc:ZDB-GENE-080303-15]	0	0	protein_coding	TRUE	TRUE
ENSDARG00000079967	prkd3	0.942295	0.692978	0	protein kinase D3 [Source:ZFIN;Acc:ZDB-GENE-130530-880]	82	81	protein_coding	FALSE	FALSE
ENSDARG00000090396	si.cabz01074946.1	0.942295	1.17868	0	si:cabz01074946.1 [Source:ZFIN;Acc:ZDB-GENE-160113-134]	0	0	protein_coding	TRUE	FALSE
ENSDARG00000091138	actr3	0.942295	1.36166	0	ARP3 actin-related protein 3 homolog (yeast) [Source:ZFIN;Acc:ZDB-GENE-040428-2]	98	97	protein_coding	FALSE	FALSE
ENSDARG00000096118	ost4	0.942295	0.52842	0	oligosaccharyltransferase complex subunit 4 (non-catalytic) [Source:ZFIN;Acc:ZDB-GENE-110307-1]	95	95	protein_coding	TRUE	FALSE
ENSDARG00000104374	smchd1	0.942295	0.789245	0	structural maintenance of chromosomes flexible hinge domain containing 1 [Source:ZFIN;Acc:ZDB-GENE-050211-6]	49	49	protein_coding	FALSE	FALSE
ENSDARG00000007867	dazap2	0.911898	0.874218	0	DAZ associated protein 2 [Source:ZFIN;Acc:ZDB-GENE-030131-3036]	59	35	protein_coding	FALSE	FALSE
ENSDARG00000017844	copz1	0.911898	0.997939	0	coatomer protein complex, subunit zeta 1 [Source:ZFIN;Acc:ZDB-GENE-000406-6]	82	81	protein_coding	FALSE	FALSE
ENSDARG00000030053	eef1db	0.911898	1.26185	0	eukaryotic translation elongation factor 1 delta b (guanine nucleotide exchange protein) [Source:ZFIN;Acc:ZDB-GENE-030131-6544]	57	57	protein_coding	FALSE	FALSE
ENSDARG00000062020	gse1	0.911898	1.22081	0	Gse1 coiled-coil protein [Source:ZFIN;Acc:ZDB-GENE-030131-9569]	35	36	protein_coding	FALSE	FALSE
ENSDARG00000062315	sik2b	0.911898	1.25969	0	salt-inducible kinase 2b [Source:ZFIN;Acc:ZDB-GENE-071012-1]	67	68	protein_coding	FALSE	FALSE
ENSDARG00000068177	pak2a	0.911898	1.20863	0	p21 protein (Cdc42/Rac)-activated kinase 2a [Source:ZFIN;Acc:ZDB-GENE-021011-2]	84	83	protein_coding	FALSE	FALSE
ENSDARG00000086173	relb	0.911898	1.30386	0	v-rel avian reticuloendotheliosis viral oncogene homolog B [Source:ZFIN;Acc:ZDB-GENE-030131-9531]	36	37	protein_coding	FALSE	FALSE
ENSDARG00000088877	smarcd2	0.911898	0.78366	0	SWI/SNF related, matrix associated, actin dependent regulator of chromatin, subfamily d, member 2 [Source:ZFIN;Acc:ZDB-GENE-080215-1]	74	74	protein_coding	FALSE	FALSE
ENSDARG00000101794	atp6v0e1	0.911898	0.796683	0	ATPase, H+ transporting, lysosomal V0 subunit e1 [Source:ZFIN;Acc:ZDB-GENE-041010-133]	69	69	protein_coding	TRUE	FALSE
ENSDARG00000101943	si.rp71.62i8.3	0.911898	1.1585	0	si:rp71-62i8.3 [Source:ZFIN;Acc:ZDB-GENE-131125-27]	0	0	lincRNA	NA	NA
ENSDARG00000103369	taldo1	0.911898	1.46149	0	transaldolase 1 [Source:ZFIN;Acc:ZDB-GENE-030131-3277]	77	77	protein_coding	FALSE	FALSE
ENSDARG00000104018	mtpn	0.911898	1.39114	0	myotrophin [Source:ZFIN;Acc:ZDB-GENE-040426-2166]	79	80	protein_coding	FALSE	FALSE
ENSDARG00000008049	si.dkey.42i9.4	0.881501	0.90437	0	si:dkey-42i9.4 [Source:ZFIN;Acc:ZDB-GENE-030131-8398]	0	0	protein_coding	FALSE	FALSE
ENSDARG00000018840	trpc4apa	0.881501	0.976821	0	transient receptor potential cation channel, subfamily C, member 4 associated protein a [Source:ZFIN;Acc:ZDB-GENE-000330-3]	73	73	protein_coding	FALSE	FALSE
ENSDARG00000025350	prdx2	0.881501	1.33123	0	peroxiredoxin 2 [Source:ZFIN;Acc:ZDB-GENE-030326-2]	35	77	protein_coding	FALSE	FALSE
ENSDARG00000031494	prrc2a	0.881501	0.935189	0	proline-rich coiled-coil 2A [Source:ZFIN;Acc:ZDB-GENE-010501-4]	37	37	protein_coding	FALSE	FALSE
ENSDARG00000039729	asap1b	0.881501	1.34784	0	ArfGAP with SH3 domain, ankyrin repeat and PH domain 1b [Source:ZFIN;Acc:ZDB-GENE-091112-16]	77	78	protein_coding	FALSE	FALSE
ENSDARG00000043593	rapgef1a	0.881501	1.0501	0	Rap guanine nucleotide exchange factor (GEF) 1a [Source:ZFIN;Acc:ZDB-GENE-081105-26]	68	67	protein_coding	FALSE	FALSE
ENSDARG00000051857	tes	0.881501	1.49352	0	testis derived transcript (3 LIM domains) [Source:ZFIN;Acc:ZDB-GENE-040718-59]	49	50	protein_coding	FALSE	FALSE
ENSDARG00000054973	itsn2b	0.881501	0.916345	0	intersectin 2b [Source:ZFIN;Acc:ZDB-GENE-050309-102]	54	55	protein_coding	FALSE	FALSE
ENSDARG00000055429	kat6b	0.881501	1.28217	0	K(lysine) acetyltransferase 6B [Source:ZFIN;Acc:ZDB-GENE-000607-52]	50	58	protein_coding	FALSE	FALSE
ENSDARG00000061741	itpr3	0.881501	1.25739	0	inositol 1,4,5-trisphosphate receptor, type 3 [Source:ZFIN;Acc:ZDB-GENE-070605-1]	74	75	protein_coding	TRUE	FALSE
ENSDARG00000071662	si.rp71.36a1.3	0.881501	0.862784	0	si:rp71-36a1.3 [Source:ZFIN;Acc:ZDB-GENE-050208-566]	0	0	protein_coding	TRUE	TRUE
ENSDARG00000073728	gal3st3	0.881501	1.17618	0	galactose-3-O-sulfotransferase 3 [Source:ZFIN;Acc:ZDB-GENE-121001-3]	54	53	protein_coding	TRUE	TRUE
ENSDARG00000097496	si.dkey.6e2.2	0.881501	0.00955023	0	si:dkey-6e2.2 [Source:ZFIN;Acc:ZDB-GENE-131121-72]	0	0	protein_coding	FALSE	FALSE
ENSDARG00000004706	syf2	0.851105	0.752755	0	SYF2 pre-mRNA-splicing factor [Source:ZFIN;Acc:ZDB-GENE-040801-170]	79	79	protein_coding	FALSE	FALSE
ENSDARG00000011934	gyg1a	0.851105	1.07076	0	glycogenin 1a [Source:ZFIN;Acc:ZDB-GENE-040426-2910]	60	63	protein_coding	FALSE	FALSE
ENSDARG00000013390	CABZ01088365.1	0.851105	1.0205	0		43	43	protein_coding	FALSE	FALSE
ENSDARG00000037059	slc44a2	0.851105	1.45017	0	solute carrier family 44 (choline transporter), member 2 [Source:ZFIN;Acc:ZDB-GENE-030131-3065]	66	68	protein_coding	TRUE	TRUE
ENSDARG00000038306	tsc22d1	0.851105	1.4941	0	TSC22 domain family, member 1 [Source:ZFIN;Acc:ZDB-GENE-030131-7785]	35	35	protein_coding	FALSE	FALSE
ENSDARG00000041217	xpo6	0.851105	0.887063	0	exportin 6 [Source:ZFIN;Acc:ZDB-GENE-030131-5912]	72	73	protein_coding	FALSE	FALSE
ENSDARG00000044299	lmnb1	0.851105	1.05539	0	lamin B1 [Source:ZFIN;Acc:ZDB-GENE-020424-2]	67	68	protein_coding	FALSE	FALSE
ENSDARG00000071467	zbtb33	0.851105	0.941059	0	zinc finger and BTB domain containing 33 [Source:ZFIN;Acc:ZDB-GENE-070412-3]	41	42	protein_coding	FALSE	FALSE
ENSDARG00000074490	casc4	0.851105	0.774103	0	cancer susceptibility candidate 4 [Source:ZFIN;Acc:ZDB-GENE-091130-1]	39	42	protein_coding	TRUE	FALSE
ENSDARG00000004189	cbx1a	0.820708	1.26613	0	chromobox homolog 1a (HP1 beta homolog Drosophila) [Source:ZFIN;Acc:ZDB-GENE-030131-4945]	68	68	protein_coding	FALSE	FALSE
ENSDARG00000023989	pef1	0.820708	0.875975	0	penta-EF-hand domain containing 1 [Source:ZFIN;Acc:ZDB-GENE-040801-259]	60	62	protein_coding	FALSE	FALSE
ENSDARG00000040465	irf2	0.820708	1.0989	0	interferon regulatory factor 2 [Source:ZFIN;Acc:ZDB-GENE-041212-38]	61	61	protein_coding	FALSE	FALSE
ENSDARG00000062485	dock11	0.820708	1.29705	0	dedicator of cytokinesis 11 [Source:ZFIN;Acc:ZDB-GENE-060503-196]	65	65	protein_coding	FALSE	FALSE
ENSDARG00000092074	dap10	0.820708	0.85259	0	hematopoietic cell signal transducer [Source:ZFIN;Acc:ZDB-GENE-061130-1]	0	0	protein_coding	TRUE	TRUE
ENSDARG00000102656	CU896640.1	0.820708	0.88502	0		0	0	protein_coding	FALSE	FALSE
ENSDARG00000003382	cwc25	0.790312	0.486998	0	CWC25 spliceosome-associated protein homolog (S. cerevisiae) [Source:ZFIN;Acc:ZDB-GENE-040426-2817]	56	56	protein_coding	FALSE	FALSE
ENSDARG00000005774	ddx3b	0.790312	1.08848	0	DEAD (Asp-Glu-Ala-Asp) box helicase 3b [Source:ZFIN;Acc:ZDB-GENE-980526-150]	72	72	protein_coding	FALSE	FALSE
ENSDARG00000022712	stat3	0.790312	0.268627	0	signal transducer and activator of transcription 3 (acute-phase response factor) [Source:ZFIN;Acc:ZDB-GENE-980526-68]	83	83	protein_coding	FALSE	FALSE
ENSDARG00000044267	sumo1	0.790312	1.39106	0	small ubiquitin-like modifier 1 [Source:ZFIN;Acc:ZDB-GENE-040426-2186]	64	81	protein_coding	FALSE	FALSE
ENSDARG00000063726	cdk12	0.790312	0.563467	0	cyclin-dependent kinase 12 [Source:ZFIN;Acc:ZDB-GENE-081104-294]	45	45	protein_coding	FALSE	FALSE
ENSDARG00000067975	atpif1a	0.790312	1.12533	0	ATPase inhibitory factor 1a [Source:ZFIN;Acc:ZDB-GENE-070410-36]	47	53	protein_coding	FALSE	FALSE
ENSDARG00000079167	PHC3..1.to.many.	0.790312	0.972731	0	si:ch211-230g15.5 [Source:ZFIN;Acc:ZDB-GENE-091204-280]	29	29	protein_coding	FALSE	FALSE
ENSDARG00000079835	man2c1	0.790312	0.889006	0	mannosidase, alpha, class 2C, member 1 [Source:ZFIN;Acc:ZDB-GENE-101103-4]	62	62	protein_coding	FALSE	FALSE
ENSDARG00000087456	NDUFB1	0.790312	0.578501	0	NADH:ubiquinone oxidoreductase subunit B1 [Source:HGNC Symbol;Acc:HGNC:7695]	0	64	protein_coding	FALSE	FALSE
ENSDARG00000093960	si.dkey.111e8.5	0.790312	0.551454	0	si:dkey-111e8.5 [Source:ZFIN;Acc:ZDB-GENE-060526-192]	0	0	protein_coding	FALSE	FALSE
ENSDARG00000098474	TWF1..1.to.many.	0.790312	0.448218	0	twinfilin actin binding protein 1 [Source:HGNC Symbol;Acc:HGNC:9620]	63	63	protein_coding	FALSE	FALSE
ENSDARG00000100766	ube2q1	0.790312	0.964867	0	ubiquitin-conjugating enzyme E2Q family member 1 [Source:ZFIN;Acc:ZDB-GENE-050522-329]	71	71	protein_coding	FALSE	FALSE
ENSDARG00000102640	pdia3	0.790312	1.04724	0	protein disulfide isomerase family A, member 3 [Source:ZFIN;Acc:ZDB-GENE-031002-9]	76	78	protein_coding	FALSE	FALSE
ENSDARG00000006766	snd1	0.759915	1.08645	0	staphylococcal nuclease and tudor domain containing 1 [Source:ZFIN;Acc:ZDB-GENE-030131-3124]	83	84	protein_coding	FALSE	FALSE
ENSDARG00000017522	ctdp1	0.759915	0.469363	0	CTD (carboxy-terminal domain, RNA polymerase II, polypeptide A) phosphatase, subunit 1 [Source:ZFIN;Acc:ZDB-GENE-040720-1]	58	59	protein_coding	FALSE	FALSE
ENSDARG00000020573	ddx3a	0.759915	1.05129	0	DEAD (Asp-Glu-Ala-Asp) box helicase 3a [Source:ZFIN;Acc:ZDB-GENE-030131-1565]	65	65	protein_coding	FALSE	FALSE
ENSDARG00000030155	ssbp3b	0.759915	0.969862	0	single stranded DNA binding protein 3b [Source:ZFIN;Acc:ZDB-GENE-040426-2801]	82	82	protein_coding	FALSE	FALSE
ENSDARG00000043467	ndufb11	0.759915	0.717234	0	NADH dehydrogenase (ubiquinone) 1 beta subcomplex, 11 [Source:ZFIN;Acc:ZDB-GENE-050309-25]	41	41	protein_coding	TRUE	FALSE
ENSDARG00000056075	rca2.1	0.759915	1.12347	0	regulator of complement activation group 2 gene 1 [Source:ZFIN;Acc:ZDB-GENE-050320-60]	18	24	protein_coding	TRUE	TRUE
ENSDARG00000059786	CABZ01059408.1	0.759915	0.0488404	0		0	0	protein_coding	TRUE	FALSE
ENSDARG00000061108	ep300b	0.759915	0.923644	0	E1A binding protein p300 b [Source:ZFIN;Acc:ZDB-GENE-080403-15]	57	57	protein_coding	FALSE	FALSE
ENSDARG00000069521	vps29	0.759915	0.908226	0	vacuolar protein sorting 29 homolog (S. cerevisiae) [Source:ZFIN;Acc:ZDB-GENE-030131-8764]	97	96	protein_coding	FALSE	FALSE
ENSDARG00000076404	MCTP1..1.to.many.	0.759915	1.00262	0	multiple C2 domains, transmembrane 1 [Source:HGNC Symbol;Acc:HGNC:26183]	74	75	protein_coding	TRUE	FALSE
ENSDARG00000099887	SLA2..1.to.many.	0.759915	1.15575	0	si:ch211-25d12.7 [Source:ZFIN;Acc:ZDB-GENE-141216-296]	41	41	protein_coding	FALSE	FALSE
ENSDARG00000100491	si.rp71.62i8.2	0.759915	0.803676	0	si:rp71-62i8.2 [Source:ZFIN;Acc:ZDB-GENE-131120-118]	0	0	lincRNA	NA	NA
ENSDARG00000101094	ATP11B	0.759915	0.943699	0	si:dkey-211e20.10 [Source:ZFIN;Acc:ZDB-GENE-081031-13]	79	79	protein_coding	TRUE	FALSE
ENSDARG00000102012	ppp1cbl	0.759915	1.04194	0	protein phosphatase 1, catalytic subunit, beta isoform, like [Source:ZFIN;Acc:ZDB-GENE-030131-6529]	0	0	protein_coding	FALSE	FALSE
ENSDARG00000103735	elovl1b	0.759915	1.39615	0	ELOVL fatty acid elongase 1b [Source:ZFIN;Acc:ZDB-GENE-040426-2755]	58	60	protein_coding	TRUE	FALSE
ENSDARG00000007362	sft2d1	0.729518	1.39731	0	SFT2 domain containing 1 [Source:ZFIN;Acc:ZDB-GENE-040426-1350]	74	75	protein_coding	TRUE	FALSE
ENSDARG00000011515	orai1a	0.729518	0.250362	0	ORAI calcium release-activated calcium modulator 1a [Source:ZFIN;Acc:ZDB-GENE-110721-1]	79	80	protein_coding	TRUE	FALSE
ENSDARG00000025789	chd4b	0.729518	0.888974	0	chromodomain helicase DNA binding protein 4b [Source:ZFIN;Acc:ZDB-GENE-030131-4532]	76	76	protein_coding	FALSE	FALSE
ENSDARG00000036375	cyfip2	0.729518	0.936866	0	cytoplasmic FMR1 interacting protein 2 [Source:ZFIN;Acc:ZDB-GENE-080724-2]	98	98	protein_coding	FALSE	FALSE
ENSDARG00000052480	pdcd11	0.729518	0.754033	0	programmed cell death 11 [Source:ZFIN;Acc:ZDB-GENE-030131-4076]	42	43	protein_coding	FALSE	FALSE
ENSDARG00000056008	atp5g1	0.729518	0.801098	0	ATP synthase, H+ transporting, mitochondrial Fo complex, subunit C1 (subunit 9) [Source:ZFIN;Acc:ZDB-GENE-040426-1966]	73	75	protein_coding	TRUE	FALSE
ENSDARG00000068650	fam214b	0.729518	0.728302	0	family with sequence similarity 214, member B [Source:ZFIN;Acc:ZDB-GENE-060526-330]	36	35	protein_coding	FALSE	FALSE
ENSDARG00000075545	ZNF646..1.to.many.	0.729518	0.826636	0	si:dkey-89b17.4 [Source:ZFIN;Acc:ZDB-GENE-030131-8215]	23	26	protein_coding	FALSE	FALSE
ENSDARG00000076297	nfatc3a	0.729518	0.677399	0	nuclear factor of activated T-cells, cytoplasmic, calcineurin-dependent 3a [Source:ZFIN;Acc:ZDB-GENE-041111-41]	59	60	protein_coding	FALSE	FALSE
ENSDARG00000099453	elof1	0.729518	0.989047	0	ELF1 homolog, elongation factor 1 [Source:ZFIN;Acc:ZDB-GENE-040426-1385]	94	94	protein_coding	FALSE	FALSE
ENSDARG00000101028	fnbp1b.1	0.729518	0.683674	0	formin binding protein 1b [Source:ZFIN;Acc:ZDB-GENE-091117-6]	71	73	protein_coding	FALSE	FALSE
ENSDARG00000105231	setd8a	0.729518	1.22789	0	SET domain containing (lysine methyltransferase) 8a [Source:ZFIN;Acc:ZDB-GENE-060825-37]	44	46	protein_coding	FALSE	FALSE
ENSDARG00000002949	ppp6c	0.699122	1.03841	0	protein phosphatase 6, catalytic subunit [Source:ZFIN;Acc:ZDB-GENE-040426-949]	100	100	protein_coding	FALSE	FALSE
ENSDARG00000005738	rpf1	0.699122	0.535382	0	ribosome production factor 1 homolog [Source:ZFIN;Acc:ZDB-GENE-040625-177]	71	70	protein_coding	FALSE	FALSE
ENSDARG00000007108	lipia	0.699122	1.26456	0	lipase, member Ia [Source:ZFIN;Acc:ZDB-GENE-040801-242]	46	48	protein_coding	FALSE	TRUE
ENSDARG00000009958	cbl	0.699122	0.55536	0	Cbl proto-oncogene, E3 ubiquitin protein ligase [Source:ZFIN;Acc:ZDB-GENE-041114-207]	70	71	protein_coding	FALSE	FALSE
ENSDARG00000011247	rnpc3	0.699122	0.402105	0	RNA-binding region (RNP1, RRM) containing 3 [Source:ZFIN;Acc:ZDB-GENE-060312-35]	54	53	protein_coding	FALSE	FALSE
ENSDARG00000014463	usf1l	0.699122	0.17983	0	upstream transcription factor 1, like [Source:ZFIN;Acc:ZDB-GENE-040426-2269]	46	46	protein_coding	FALSE	FALSE
ENSDARG00000021488	cyth1b	0.699122	1.19544	0	cytohesin 1b [Source:ZFIN;Acc:ZDB-GENE-030131-4311]	92	91	protein_coding	FALSE	FALSE
ENSDARG00000031776	zgc.92066	0.699122	1.16445	0	zgc:92066 [Source:ZFIN;Acc:ZDB-GENE-040718-72]	0	0	protein_coding	TRUE	FALSE
ENSDARG00000038228	sepw2a	0.699122	0.676789	0	selenoprotein W, 2a [Source:ZFIN;Acc:ZDB-GENE-030428-1]	56	52	protein_coding	FALSE	FALSE
ENSDARG00000038737	phf20b	0.699122	0.788877	0	PHD finger protein 20, b [Source:ZFIN;Acc:ZDB-GENE-040822-33]	38	39	protein_coding	FALSE	FALSE
ENSDARG00000042236	atrx	0.699122	1.21474	0	alpha thalassemia/mental retardation syndrome X-linked homolog (human) [Source:ZFIN;Acc:ZDB-GENE-030912-11]	58	59	protein_coding	FALSE	FALSE
ENSDARG00000044073	fuca2	0.699122	0.662212	0	fucosidase, alpha-L- 2, plasma [Source:ZFIN;Acc:ZDB-GENE-040822-39]	62	64	protein_coding	FALSE	TRUE
ENSDARG00000053097	hsf2	0.699122	1.3111	0	heat shock transcription factor 2 [Source:ZFIN;Acc:ZDB-GENE-011128-1]	55	56	protein_coding	FALSE	FALSE
ENSDARG00000058946	CU856539.2	0.699122	0.695893	0		0	0	protein_coding	FALSE	FALSE
ENSDARG00000071395	camk2g1	0.699122	0.828209	0	calcium/calmodulin-dependent protein kinase (CaM kinase) II gamma 1 [Source:ZFIN;Acc:ZDB-GENE-050913-146]	75	76	protein_coding	FALSE	FALSE
ENSDARG00000074283	inpp5d	0.699122	1.3451	0	inositol polyphosphate-5-phosphatase D [Source:ZFIN;Acc:ZDB-GENE-100922-30]	59	58	protein_coding	FALSE	FALSE
ENSDARG00000078824	si.ch211.66e2.3	0.699122	0.912796	0	si:ch211-66e2.3 [Source:ZFIN;Acc:ZDB-GENE-080226-7]	0	0	protein_coding	FALSE	TRUE
ENSDARG00000102599	TGOLN2	0.699122	-0.0398839	0	si:ch1073-392o20.2 [Source:ZFIN;Acc:ZDB-GENE-091204-431]	23	25	protein_coding	TRUE	TRUE
ENSDARG00000103337	rrp1	0.699122	0.0909064	0	ribosomal RNA processing 1 [Source:ZFIN;Acc:ZDB-GENE-030131-9837]	34	29	protein_coding	FALSE	FALSE
ENSDARG00000103340	clic1	0.699122	1.43771	0	chloride intracellular channel 1 [Source:ZFIN;Acc:ZDB-GENE-030131-3202]	75	76	protein_coding	FALSE	FALSE
ENSDARG00000002970	ss18	0.668725	0.848079	0	synovial sarcoma translocation, chromosome 18 (H. sapiens) [Source:ZFIN;Acc:ZDB-GENE-030131-4867]	75	76	protein_coding	FALSE	FALSE
ENSDARG00000003153	cpsf5	0.668725	0.408791	0	cleavage and polyadenylation specific factor 5 [Source:ZFIN;Acc:ZDB-GENE-040426-1316]	97	97	protein_coding	FALSE	FALSE
ENSDARG00000008966	tbl1xr1b	0.668725	1.02363	0	transducin (beta)-like 1 X-linked receptor 1b [Source:ZFIN;Acc:ZDB-GENE-040426-1192]	0	0	protein_coding	FALSE	FALSE
ENSDARG00000014439	dgkza	0.668725	1.12343	0	diacylglycerol kinase, zeta a [Source:ZFIN;Acc:ZDB-GENE-111104-3]	66	66	protein_coding	FALSE	FALSE
ENSDARG00000015978	zgc.86599	0.668725	0.953118	0	zgc:86599 [Source:ZFIN;Acc:ZDB-GENE-040625-180]	62	63	protein_coding	FALSE	FALSE
ENSDARG00000019098	cd82a	0.668725	0.411597	0	CD82 molecule a [Source:ZFIN;Acc:ZDB-GENE-030131-2818]	52	53	protein_coding	TRUE	FALSE
ENSDARG00000019113	mob3a	0.668725	0.982587	0	MOB kinase activator 3A [Source:ZFIN;Acc:ZDB-GENE-030131-4091]	88	85	protein_coding	FALSE	FALSE
ENSDARG00000028542	si.ch211.114c12.2	0.668725	1.04174	0	si:ch211-114c12.2 [Source:ZFIN;Acc:ZDB-GENE-030131-8522]	0	0	protein_coding	FALSE	FALSE
ENSDARG00000038576	ube2d1b	0.668725	0.9087	0	ubiquitin-conjugating enzyme E2D 1b [Source:ZFIN;Acc:ZDB-GENE-030131-2735]	95	95	protein_coding	FALSE	FALSE
ENSDARG00000040396	bcl7bb	0.668725	0.681028	0	B-cell CLL/lymphoma 7B, b [Source:ZFIN;Acc:ZDB-GENE-010328-17]	64	52	protein_coding	FALSE	FALSE
ENSDARG00000052826	runx3	0.668725	0.965834	0	runt-related transcription factor 3 [Source:ZFIN;Acc:ZDB-GENE-000605-2]	61	64	protein_coding	FALSE	FALSE
ENSDARG00000053446	sub1a	0.668725	0.899445	0	SUB1 homolog, transcriptional regulator a [Source:ZFIN;Acc:ZDB-GENE-050522-151]	80	83	protein_coding	FALSE	FALSE
ENSDARG00000057093	kdm5ba	0.668725	1.01392	0	lysine (K)-specific demethylase 5Ba [Source:ZFIN;Acc:ZDB-GENE-030131-5379]	64	64	protein_coding	FALSE	FALSE
ENSDARG00000057249	zmynd11	0.668725	1.18193	0	zinc finger, MYND-type containing 11 [Source:ZFIN;Acc:ZDB-GENE-050522-301]	69	70	protein_coding	FALSE	FALSE
ENSDARG00000057912	eif1axb	0.668725	0.400431	0	eukaryotic translation initiation factor 1A, X-linked, b [Source:ZFIN;Acc:ZDB-GENE-030131-1319]	89	94	protein_coding	FALSE	FALSE
ENSDARG00000068992	hspa8	0.668725	1.32186	0	heat shock protein 8 [Source:ZFIN;Acc:ZDB-GENE-990415-92]	95	95	protein_coding	FALSE	FALSE
ENSDARG00000069298	osbpl9	0.668725	0.615118	0	oxysterol binding protein-like 9 [Source:ZFIN;Acc:ZDB-GENE-061110-103]	82	82	protein_coding	FALSE	FALSE
ENSDARG00000076509	polr2d	0.668725	0.808172	0	polymerase (RNA) II (DNA directed) polypeptide D [Source:ZFIN;Acc:ZDB-GENE-040714-2]	89	89	protein_coding	FALSE	FALSE
ENSDARG00000086842	dap1b.2	0.668725	1.02464	0	death associated protein 1b [Source:ZFIN;Acc:ZDB-GENE-000511-4]	37	38	protein_coding	FALSE	FALSE
ENSDARG00000094043	TTF1..1.to.many..2	0.668725	0.561873	0	si:ch73-376l24.3 [Source:ZFIN;Acc:ZDB-GENE-100922-5]	28	26	protein_coding	FALSE	FALSE
ENSDARG00000095393	si.dkey.114b16.5	0.668725	0.25802	0	si:dkey-114b16.5 [Source:ZFIN;Acc:ZDB-GENE-081105-20]	0	0	processed_transcript	NA	NA
ENSDARG00000102619	si.dkeyp.79b7.13	0.668725	-0.132865	0	si:dkeyp-79b7.13 [Source:ZFIN;Acc:ZDB-GENE-141216-222]	0	0	lincRNA	NA	NA
ENSDARG00000105509	si.cabz01074944.1	0.668725	1.06291	0	si:cabz01074944.1 [Source:ZFIN;Acc:ZDB-GENE-160113-145]	NA	NA	protein_coding	NA	NA
ENSDARG00000004702	irf2bp2a	0.638329	0.668628	0	interferon regulatory factor 2 binding protein 2a [Source:ZFIN;Acc:ZDB-GENE-030131-7809]	51	51	protein_coding	FALSE	FALSE
ENSDARG00000006200	eif4g1a	0.638329	1.04711	0	eukaryotic translation initiation factor 4 gamma, 1a [Source:ZFIN;Acc:ZDB-GENE-070112-702]	50	52	protein_coding	FALSE	FALSE
ENSDARG00000006487	anp32a	0.638329	1.14185	0	acidic (leucine-rich) nuclear phosphoprotein 32 family, member A [Source:ZFIN;Acc:ZDB-GENE-030131-7850]	74	42	protein_coding	FALSE	FALSE
ENSDARG00000008748	ube2na	0.638329	0.933496	0	ubiquitin-conjugating enzyme E2Na [Source:ZFIN;Acc:ZDB-GENE-040426-2873]	97	97	protein_coding	FALSE	FALSE
ENSDARG00000011122	pptc7a	0.638329	1.30101	0	PTC7 protein phosphatase homolog a [Source:ZFIN;Acc:ZDB-GENE-041114-74]	94	94	protein_coding	FALSE	FALSE
ENSDARG00000012729	hcls1	0.638329	1.39003	0	hematopoietic cell-specific Lyn substrate 1 [Source:ZFIN;Acc:ZDB-GENE-030131-7191]	43	44	protein_coding	FALSE	FALSE
ENSDARG00000016393	arf2b	0.638329	0.790004	0	ADP-ribosylation factor 2b [Source:ZFIN;Acc:ZDB-GENE-030131-5234]	97	0	protein_coding	FALSE	FALSE
ENSDARG00000044755	GCNT4..1.to.many.	0.638329	1.33388	0	si:dkeyp-87d8.8 [Source:ZFIN;Acc:ZDB-GENE-041111-161]	54	55	protein_coding	TRUE	FALSE
ENSDARG00000045768	cry1aa	0.638329	1.17892	0	cryptochrome circadian clock 1aa [Source:ZFIN;Acc:ZDB-GENE-010426-2]	78	78	protein_coding	FALSE	FALSE
ENSDARG00000061338	ddx6	0.638329	1.16025	0	DEAD (Asp-Glu-Ala-Asp) box helicase 6 [Source:ZFIN;Acc:ZDB-GENE-070912-83]	89	89	protein_coding	FALSE	FALSE
ENSDARG00000062352	sema4ab	0.638329	0.345054	0	sema domain, immunoglobulin domain (Ig), transmembrane domain (TM) and short cytoplasmic domain, (semaphorin) 4Ab [Source:ZFIN;Acc:ZDB-GENE-060503-363]	31	32	protein_coding	TRUE	TRUE
ENSDARG00000070721	vdrb	0.638329	0.322893	0	vitamin D (1,25- dihydroxyvitamin D3) receptor b [Source:ZFIN;Acc:ZDB-GENE-080403-10]	70	72	protein_coding	FALSE	FALSE
ENSDARG00000074345	si.ch211.214b16.4	0.638329	0.924294	0	si:ch211-214b16.4 [Source:ZFIN;Acc:ZDB-GENE-081105-53]	0	0	protein_coding	FALSE	FALSE
ENSDARG00000077481	si.dkey.76k16.6	0.638329	0.483722	0	si:dkey-76k16.6 [Source:ZFIN;Acc:ZDB-GENE-090312-171]	23	23	protein_coding	FALSE	FALSE
ENSDARG00000079102	PRRG3	0.638329	1.07408	0	si:dkey-38k9.5 [Source:ZFIN;Acc:ZDB-GENE-091204-100]	47	47	protein_coding	TRUE	FALSE
ENSDARG00000087402	TPM1	0.638329	0.992452	0	zgc:171719 [Source:ZFIN;Acc:ZDB-GENE-070822-17]	85	79	protein_coding	FALSE	FALSE
ENSDARG00000093313	ubb	0.638329	0.668753	0	ubiquitin B [Source:ZFIN;Acc:ZDB-GENE-050411-10]	0	99	protein_coding	FALSE	FALSE
ENSDARG00000094673	rhoab	0.638329	1.26305	0	ras homolog gene family, member Ab [Source:ZFIN;Acc:ZDB-GENE-040322-2]	96	54	protein_coding	FALSE	FALSE
ENSDARG00000094975	si.ch211.214p16.2	0.638329	1.12917	0	si:ch211-214p16.2 [Source:ZFIN;Acc:ZDB-GENE-030616-607]	0	0	processed_transcript	NA	NA
ENSDARG00000095782	si.ch211.209l18.6	0.638329	0.534804	0	si:ch211-209l18.6 [Source:ZFIN;Acc:ZDB-GENE-110411-11]	0	0	processed_transcript	NA	NA
ENSDARG00000098121	si.ch73.14h10.4	0.638329	1.06531	0	si:ch73-14h10.4 [Source:ZFIN;Acc:ZDB-GENE-141215-25]	0	0	lincRNA	NA	NA
ENSDARG00000103670	cmc1	0.638329	0.587154	0	C-x(9)-C motif containing 1 [Source:ZFIN;Acc:ZDB-GENE-040426-2626]	65	67	protein_coding	FALSE	FALSE
[truncated: 31,464 more rows]

## Sheet: C3vs(C1,C2)
Ensembl Gene ID	Gene Name	Fold Change	Z-score	adjusted Z-score	Description	% sequence identity against mouse ortholog	% sequence identity against human ortholog	Gene Type	transMembrane	signalPeptide
[truncated: 32,106 more rows]
