# Supplementary material for: Single-cell transcriptome analysis of fish immune cells provides insight into the evolution of vertebrate immune cell types
Source: Genome Res. 2017 Mar;27(3):451–61. doi: 10.1101/gr.207704.116 (PMC5340972; doi:10.1101/gr.207704.116)
Supplement: Supplemental Material [file supp_gr.207704.116_Supplemental_Table_S3.xlsx]

## Sheet: Sheet1
Post-ray finned fish duplications
Immune genes with conserved expression pattern after gene duplication
Paralog 1 Ensembl.Gene.ID	Paralog 1 gene name	Paralog 2 Ensembl.Gene.ID	Paralog 2 gene name	Ancestor	Paralog 1 Expression Pattern	Paralog 2 Expression Pattern
ENSDARG00000101754	ENSDARG00000104918	Danio rerio	BX664622.3	si.ch211.196f19.1	dre_Myel	dre_Myel
ENSDARG00000033963	ENSDARG00000069848	Danio rerio	nitr1j	nitr1b	dre_NK	dre_NK
ENSDARG00000033963	ENSDARG00000043398	Danio rerio	nitr1j	nitr2a	dre_NK	dre_NK
ENSDARG00000033963	ENSDARG00000000460	Danio rerio	nitr1j	nitr2b	dre_NK	dre_NK
ENSDARG00000069848	ENSDARG00000043398	Danio rerio	nitr1b	nitr2a	dre_NK	dre_NK
ENSDARG00000069848	ENSDARG00000000460	Danio rerio	nitr1b	nitr2b	dre_NK	dre_NK
ENSDARG00000000460	ENSDARG00000043398	Danio rerio	nitr2b	nitr2a	dre_NK	dre_NK
ENSDARG00000091993	ENSDARG00000099674	Danio rerio	dicp1.1	dicp3.1	dre_NK	dre_NK
ENSDARG00000041060	ENSDARG00000025903	Danio rerio	zgc.92326	lgals9l1	dre_NK	dre_NK
ENSDARG00000078451	ENSDARG00000055986	Otophysa	si.ch211.165b19.4	si.ch211.165b19.5	dre_NK	dre_NK
ENSDARG00000041835	ENSDARG00000041923	Danio rerio	ccl38a.5	ccl38.6	dre_NK	dre_NK
ENSDARG00000078193	ENSDARG00000069978	Danio rerio	si.ch211.67e16.3	si.ch211.67e16.2	dre_Tcell	dre_Tcell
ENSDARG00000071001	ENSDARG00000091951	Danio rerio	NUGGC..1.to.many.	NUGGC..1.to.many..4	dre_Tcell	dre_Tcell
ENSDARG00000036161	ENSDARG00000036162	Clupeocephala	hnrnpa0l.1	hnrnpa0b	depleted_Myeloid	depleted_Myeloid
Immune genes with diverged expression pattern after gene duplication
Paralog 1 Ensembl.Gene.ID	Paralog 1 gene name	Paralog 2 Ensembl.Gene.ID	Paralog 2 gene name	Ancestor	Paralog 1 Expression Pattern	Paralog 2 Expression Pattern
ENSDARG00000038011	ENSDARG00000103984	Clupeocephala	cyth4a	cyth4b	allClusters	dre_NK
ENSDARG00000104077	ENSDARG00000103276	Danio rerio	fcer1gl	fcer1g	dre_Myel	dre_NK
ENSDARG00000089202	ENSDARG00000058673	Danio rerio	nkl.3	nkl.2	dre_Myel	dre_NK
ENSDARG00000097993	ENSDARG00000058839	Neopterygii	si.ch211.191c10.1	SUSD1	allClusters	dre_Tcell
ENSDARG00000092878	ENSDARG00000091951	Neopterygii	NUGGC..1.to.many..2	NUGGC..1.to.many..4	allClusters	dre_Tcell
ENSDARG00000092878	ENSDARG00000071001	Neopterygii	NUGGC..1.to.many..2	NUGGC..1.to.many.	allClusters	dre_Tcell
ENSDARG00000022129	ENSDARG00000055080	Neopterygii	rbm4.3	rbm4.2	allClusters	dre_Tcell
ENSDARG00000094984	ENSDARG00000002293	Danio rerio	si.ch211.197g15.8	si.ch211.197g15.9	allClusters	dre_Tcell
ENSDARG00000031745	ENSDARG00000103716	Danio rerio	si.busm1.266f07.2	si.busm1.48c11.3	dre_Myel	dre_Tcell
ENSDARG00000063068	ENSDARG00000053484	Neopterygii	syne1b	syne2b	allClusters	depleted_Tcell
ENSDARG00000079780	ENSDARG00000040564	Otophysa	HNRNPUL1..1.to.many.	hnrnpul1	allClusters	depleted_Tcell
ENSDARG00000089202	ENSDARG00000044023	Danio rerio	nkl.3	nkl.4	dre_Myel	depleted_Tcell
ENSDARG00000021444	ENSDARG00000073969	Danio rerio	prf1.2	prf1.7	dre_NK	depleted_Tcell
ENSDARG00000058673	ENSDARG00000044023	Danio rerio	nkl.2	nkl.4	dre_NK	depleted_Tcell
ENSDARG00000071241	ENSDARG00000092407	Danio rerio	trim35.39	TRIM35..1.to.many..2	allClusters	depleted_NK
ENSDARG00000101337	ENSDARG00000104635	Danio rerio	zgc.103700	si.busm1.194e12.12	allClusters	depleted_NK
ENSDARG00000079105	ENSDARG00000104635	Danio rerio	mhc2dab	si.busm1.194e12.12	allClusters	depleted_NK
ENSDARG00000040184	ENSDARG00000026723	Neopterygii	syncrip	syncripl	allClusters	depleted_NK
ENSDARG00000092106	ENSDARG00000105033	Danio rerio	si.ch211.214p13.8	BX897691.1	dre_Tcell	depleted_NK
ENSDARG00000075560	ENSDARG00000079312	Clupeocephala	kmt2cb	kmt2ca	dre_NK	depleted_Myeloid
ENSDARG00000057633	ENSDARG00000041959	Clupeocephala	cxcr4a	cxcr4b	dre_Tcell	depleted_Myeloid
ENSDARG00000040432	ENSDARG00000042667	Clupeocephala	klf2b	klf2a	dre_Tcell	depleted_Myeloid
ENSDARG00000075963	ENSDARG00000092731	Danio rerio	mhc1uba	mhc1uka	dre_Tcell	depleted_Myeloid
Pre-ray finned fish duplications
Immune genes with conserved expression pattern after gene duplication
Paralog 1 Ensembl.Gene.ID	Paralog 1 gene name	Paralog 2 Ensembl.Gene.ID	Paralog 2 gene name	Ancestor	Paralog 1 Expression Pattern	Paralog 2 Expression Pattern
ENSDARG00000055283	ENSDARG00000054823	Euteleostomi	id2a	id3	dre_Myel	dre_Myel
ENSDARG00000055186	ENSDARG00000044561	Euteleostomi	ccr9a	ccr7	dre_Tcell	dre_Tcell
ENSDARG00000055186	ENSDARG00000057633	Vertebrata	ccr9a	cxcr4a	dre_Tcell	dre_Tcell
ENSDARG00000057633	ENSDARG00000044561	Vertebrata	cxcr4a	ccr7	dre_Tcell	dre_Tcell
ENSDARG00000036161	ENSDARG00000007960	Bilateria	hnrnpa0l.1	hnrnpaba	depleted_Myeloid	depleted_Myeloid
ENSDARG00000010384	ENSDARG00000010317	Vertebrata	lpar5a	gpr183a	depleted_Myeloid	depleted_Myeloid
ENSDARG00000007960	ENSDARG00000036162	Bilateria	hnrnpaba	hnrnpa0b	depleted_Myeloid	depleted_Myeloid
ENSDARG00000007358	ENSDARG00000041959	Vertebrata	cxcr3.1	cxcr4b	depleted_Myeloid	depleted_Myeloid
Immune genes with diverged expression pattern after gene duplication
Paralog 1 Ensembl.Gene.ID	Paralog 1 gene name	Paralog 2 Ensembl.Gene.ID	Paralog 2 gene name	Ancestor	Paralog 1 Expression Pattern	Paralog 2 Expression Pattern
ENSDARG00000100054	ENSDARG00000070165	Euteleostomi	CABZ01053483.1	tnfrsf1b	allClusters	dre_NK
ENSDARG00000062080	ENSDARG00000075437	Euteleostomi	shc2	shc1	allClusters	dre_NK
ENSDARG00000014348	ENSDARG00000075164	Bilateria	stk17b	mylk5	allClusters	dre_NK
ENSDARG00000103900	ENSDARG00000032606	Bilateria	sept9b	sept8a	allClusters	dre_NK
ENSDARG00000015922	ENSDARG00000075164	Bilateria	zgc.153952	mylk5	allClusters	dre_NK
ENSDARG00000026845	ENSDARG00000054389	Bilateria	rhoaa	rhof	allClusters	dre_NK
ENSDARG00000009020	ENSDARG00000101814	Chordata	cnr1	lpar3	allClusters	dre_NK
ENSDARG00000027807	ENSDARG00000004378	Bilateria	fynrk	yrk	allClusters	dre_NK
ENSDARG00000097680	ENSDARG00000027222	Bilateria	ADGRE5..1.to.many.	adgrg1	allClusters	dre_NK
ENSDARG00000005159	ENSDARG00000103984	Vertebrata	cyth3b	cyth4b	allClusters	dre_NK
ENSDARG00000101094	ENSDARG00000099216	Bilateria	ATP11B	atp8b2	allClusters	dre_NK
ENSDARG00000006468	ENSDARG00000005414	Euteleostomi	grap2a	grapa	allClusters	dre_NK
ENSDARG00000100515	ENSDARG00000098108	Euteleostomi	dusp1	dusp2	allClusters	dre_NK
ENSDARG00000027590	ENSDARG00000032606	Bilateria	36038	sept8a	allClusters	dre_NK
ENSDARG00000076742	ENSDARG00000103984	Vertebrata	cyth1a	cyth4b	allClusters	dre_NK
ENSDARG00000015374	ENSDARG00000037556	Vertebrata	st3gal3a	st3gal5	allClusters	dre_NK
ENSDARG00000101777	ENSDARG00000060766	Bilateria	pdlim5a	PXN	allClusters	dre_NK
ENSDARG00000070161	ENSDARG00000024116	Bilateria	vamp3	vamp8	allClusters	dre_NK
ENSDARG00000099672	ENSDARG00000055075	Bilateria	capgb	svila	allClusters	dre_NK
ENSDARG00000019191	ENSDARG00000032606	Bilateria	39691	sept8a	allClusters	dre_NK
ENSDARG00000058348	ENSDARG00000055075	Bilateria	scinlb	svila	allClusters	dre_NK
ENSDARG00000052673	ENSDARG00000032606	Bilateria	sept7b	sept8a	allClusters	dre_NK
ENSDARG00000010728	ENSDARG00000055075	Bilateria	scin	svila	allClusters	dre_NK
ENSDARG00000062328	ENSDARG00000061796	Euteleostomi	rasgrp2	rasgrp4	allClusters	dre_NK
ENSDARG00000013390	ENSDARG00000075673	Bilateria	CABZ01088365.1	arhgap21b	allClusters	dre_NK
ENSDARG00000037060	ENSDARG00000075560	Vertebrata	kmt2d	kmt2cb	allClusters	dre_NK
ENSDARG00000004537	ENSDARG00000075560	Bilateria	kmt2a	kmt2cb	allClusters	dre_NK
ENSDARG00000101169	ENSDARG00000005414	Euteleostomi	grap2b	grapa	dre_Myel	dre_NK
ENSDARG00000094673	ENSDARG00000054389	Bilateria	rhoab	rhof	dre_Myel	dre_NK
ENSDARG00000058647	ENSDARG00000004378	Chordata	hck	yrk	dre_Myel	dre_NK
ENSDARG00000086616	ENSDARG00000044561	Euteleostomi	cabz01093075.1	ccr7	allClusters	dre_Tcell
ENSDARG00000086616	ENSDARG00000055186	Euteleostomi	cabz01093075.1	ccr9a	allClusters	dre_Tcell
ENSDARG00000086616	ENSDARG00000057633	Vertebrata	cabz01093075.1	cxcr4a	allClusters	dre_Tcell
ENSDARG00000038695	ENSDARG00000032175	Bilateria	elavl1	puf60a	allClusters	dre_Tcell
ENSDARG00000095789	ENSDARG00000044561	Euteleostomi	ccr8.1	ccr7	allClusters	dre_Tcell
ENSDARG00000095789	ENSDARG00000055186	Euteleostomi	ccr8.1	ccr9a	allClusters	dre_Tcell
ENSDARG00000095789	ENSDARG00000057633	Vertebrata	ccr8.1	cxcr4a	allClusters	dre_Tcell
ENSDARG00000103834	ENSDARG00000055080	Bilateria	rbm14b.1	rbm4.2	allClusters	dre_Tcell
ENSDARG00000022254	ENSDARG00000034173	Bilateria	prkcbb	prkcq	allClusters	dre_Tcell
ENSDARG00000058504	ENSDARG00000056803	Euteleostomi	ap1s2	ap1s1	allClusters	dre_Tcell
ENSDARG00000006487	ENSDARG00000054804	Euteleostomi	anp32a	anp32e	allClusters	dre_Tcell
ENSDARG00000093082	ENSDARG00000054548	Euteleostomi	CABZ01059412.1	si.ch73.285p12.4	allClusters	dre_Tcell
ENSDARG00000105294	ENSDARG00000044457	Bilateria	CABZ01051902.1	gfi1ab	allClusters	dre_Tcell
ENSDARG00000059786	ENSDARG00000054548	Euteleostomi	CABZ01059408.1	si.ch73.285p12.4	allClusters	dre_Tcell
ENSDARG00000098641	ENSDARG00000031108	Bilateria	nbeal2	lrba	allClusters	dre_Tcell
ENSDARG00000103714	ENSDARG00000031343	Euteleostomi	rab6a	rab6bb	allClusters	dre_Tcell
ENSDARG00000057027	ENSDARG00000044601	Euteleostomi	rtn2b	rtn4a	allClusters	dre_Tcell
ENSDARG00000101337	ENSDARG00000103716	Euteleostomi	zgc.103700	si.busm1.48c11.3	allClusters	dre_Tcell
ENSDARG00000074633	ENSDARG00000043447	Euteleostomi	gpr35.1	gpr55a	allClusters	dre_Tcell
ENSDARG00000079105	ENSDARG00000103716	Euteleostomi	mhc2dab	si.busm1.48c11.3	allClusters	dre_Tcell
ENSDARG00000027109	ENSDARG00000014591	Bilateria	zfr	ilf2	allClusters	dre_Tcell
ENSDARG00000036588	ENSDARG00000075963	Euteleostomi	mhc1zba	mhc1uba	allClusters	dre_Tcell
ENSDARG00000016783	ENSDARG00000105293	Vertebrata	srsf6b	srsf4	allClusters	dre_Tcell
ENSDARG00000061757	ENSDARG00000062081	Bilateria	rabgap1l	tbc1d1	allClusters	dre_Tcell
ENSDARG00000057691	ENSDARG00000105293	Bilateria	srsf1a	srsf4	allClusters	dre_Tcell
ENSDARG00000102956	ENSDARG00000010556	Euteleostomi	mmp17b	MMP25..1.to.many.	allClusters	dre_Tcell
ENSDARG00000017219	ENSDARG00000032175	Bilateria	pabpc1a	puf60a	allClusters	dre_Tcell
ENSDARG00000029402	ENSDARG00000013892	Chordata	sort1a	sorl1	allClusters	dre_Tcell
ENSDARG00000009594	ENSDARG00000021163	Bilateria	nr1d2b	thrb	allClusters	dre_Tcell
ENSDARG00000035325	ENSDARG00000105293	Bilateria	srsf7a	srsf4	allClusters	dre_Tcell
ENSDARG00000030224	ENSDARG00000099241	Euteleostomi	ppp2ca	ppp2cb	allClusters	dre_Tcell
ENSDARG00000056929	ENSDARG00000061759	Bilateria	kdm6bb	kdm6a	allClusters	dre_Tcell
ENSDARG00000013390	ENSDARG00000062349	Vertebrata	CABZ01088365.1	arhgap15	allClusters	dre_Tcell
ENSDARG00000018587	ENSDARG00000054548	Euteleostomi	zgc.152658	si.ch73.285p12.4	allClusters	dre_Tcell
ENSDARG00000070651	ENSDARG00000034173	Vertebrata	prkcdb	prkcq	allClusters	dre_Tcell
ENSDARG00000068711	ENSDARG00000078042	Euteleostomi	crfb4	il10rb	allClusters	dre_Tcell
ENSDARG00000060184	ENSDARG00000034173	Bilateria	pkn1a	prkcq	allClusters	dre_Tcell
ENSDARG00000008723	ENSDARG00000034173	Bilateria	prkcba	prkcq	allClusters	dre_Tcell
ENSDARG00000023330	ENSDARG00000054804	Euteleostomi	anp32b	anp32e	allClusters	dre_Tcell
ENSDARG00000063108	ENSDARG00000054548	Euteleostomi	CABZ01059392.1	si.ch73.285p12.4	dre_Myel	dre_Tcell
ENSDARG00000029474	ENSDARG00000056206	Bilateria	camk1b	camk2g2	dre_Myel	dre_Tcell
ENSDARG00000075673	ENSDARG00000062349	Bilateria	arhgap21b	arhgap15	dre_NK	dre_Tcell
ENSDARG00000045200	ENSDARG00000039850	Bilateria	dusp19b	dusp22b	allClusters	depleted_Tcell
ENSDARG00000039682	ENSDARG00000039850	Bilateria	DUPD1..1.to.many..17	dusp22b	allClusters	depleted_Tcell
ENSDARG00000027807	ENSDARG00000007783	Bilateria	fynrk	blk	allClusters	depleted_Tcell
ENSDARG00000078598	ENSDARG00000039850	Bilateria	si.ch1073.184j22.2	dusp22b	allClusters	depleted_Tcell
ENSDARG00000004735	ENSDARG00000040564	Euteleostomi	hnrnpub	hnrnpul1	allClusters	depleted_Tcell
ENSDARG00000012586	ENSDARG00000004372	Vertebrata	fmnl2a	fmnl3	allClusters	depleted_Tcell
ENSDARG00000058647	ENSDARG00000007783	Vertebrata	hck	blk	dre_Myel	depleted_Tcell
ENSDARG00000004378	ENSDARG00000007783	Chordata	yrk	blk	dre_NK	depleted_Tcell
ENSDARG00000036675	ENSDARG00000059246	Bilateria	hnrnpa1b	hnrnpd	allClusters	depleted_NK
ENSDARG00000045553	ENSDARG00000016213	Bilateria	hsd17b2	BX088711.1	allClusters	depleted_NK
ENSDARG00000079688	ENSDARG00000074161	Chordata	tnrc6a	tnrc6b	allClusters	depleted_NK
ENSDARG00000074166	ENSDARG00000029215	Bilateria	birc6	ube2z	allClusters	depleted_NK
ENSDARG00000003429	ENSDARG00000059246	Euteleostomi	hnrpdl	hnrnpd	allClusters	depleted_NK
ENSDARG00000089213	ENSDARG00000059693	Vertebrata	adam15	adam19a	allClusters	depleted_NK
ENSDARG00000014569	ENSDARG00000026723	Euteleostomi	hnrnpr	syncripl	allClusters	depleted_NK
ENSDARG00000052856	ENSDARG00000097478	Bilateria	khdrbs1a	qkia	allClusters	depleted_NK
ENSDARG00000070475	ENSDARG00000097478	Bilateria	khdrbs1b	qkia	allClusters	depleted_NK
ENSDARG00000103720	ENSDARG00000021806	Euteleostomi	ZFP36	zfp36l2	allClusters	depleted_NK
ENSDARG00000062328	ENSDARG00000077864	Euteleostomi	rasgrp2	rasgrp3	allClusters	depleted_NK
ENSDARG00000067545	ENSDARG00000059693	Euteleostomi	adam19b	adam19a	allClusters	depleted_NK
ENSDARG00000031745	ENSDARG00000104635	Euteleostomi	si.busm1.266f07.2	si.busm1.194e12.12	dre_Myel	depleted_NK
ENSDARG00000029474	ENSDARG00000100089	Bilateria	camk1b	camk2b2	dre_Myel	depleted_NK
ENSDARG00000061796	ENSDARG00000077864	Euteleostomi	rasgrp4	rasgrp3	dre_NK	depleted_NK
ENSDARG00000056206	ENSDARG00000100089	Vertebrata	camk2g2	camk2b2	dre_Tcell	depleted_NK
ENSDARG00000103716	ENSDARG00000104635	Euteleostomi	si.busm1.48c11.3	si.busm1.194e12.12	dre_Tcell	depleted_NK
ENSDARG00000062801	ENSDARG00000040080	Bilateria	erfl3	fli1b	dre_Myel	depleted_Myeloid
ENSDARG00000019128	ENSDARG00000005162	Vertebrata	tpm4b	tpm3	dre_Myel	depleted_Myeloid
ENSDARG00000058647	ENSDARG00000102525	Vertebrata	hck	lck	dre_Myel	depleted_Myeloid
ENSDARG00000008186	ENSDARG00000015752	Euteleostomi	syk	zap70	dre_Myel	depleted_Myeloid
ENSDARG00000101814	ENSDARG00000074851	Vertebrata	lpar3	s1pr4	dre_NK	depleted_Myeloid
ENSDARG00000078451	ENSDARG00000090380	Euteleostomi	si.ch211.165b19.4	gzmk	dre_NK	depleted_Myeloid
ENSDARG00000055986	ENSDARG00000090380	Euteleostomi	si.ch211.165b19.5	gzmk	dre_NK	depleted_Myeloid
ENSDARG00000004378	ENSDARG00000102525	Chordata	yrk	lck	dre_NK	depleted_Myeloid
ENSDARG00000032606	ENSDARG00000010721	Euteleostomi	sept8a	37499	dre_NK	depleted_Myeloid
ENSDARG00000075673	ENSDARG00000062049	Bilateria	arhgap21b	hmha1b	dre_NK	depleted_Myeloid
ENSDARG00000013892	ENSDARG00000056252	Chordata	sorl1	sort1b	dre_Tcell	depleted_Myeloid
ENSDARG00000105293	ENSDARG00000029818	Vertebrata	srsf4	srsf5a	dre_Tcell	depleted_Myeloid
ENSDARG00000055186	ENSDARG00000007358	Vertebrata	ccr9a	cxcr3.1	dre_Tcell	depleted_Myeloid
ENSDARG00000055186	ENSDARG00000041959	Vertebrata	ccr9a	cxcr4b	dre_Tcell	depleted_Myeloid
ENSDARG00000057633	ENSDARG00000007358	Vertebrata	cxcr4a	cxcr3.1	dre_Tcell	depleted_Myeloid
ENSDARG00000044561	ENSDARG00000007358	Vertebrata	ccr7	cxcr3.1	dre_Tcell	depleted_Myeloid
ENSDARG00000044561	ENSDARG00000041959	Vertebrata	ccr7	cxcr4b	dre_Tcell	depleted_Myeloid
ENSDARG00000062349	ENSDARG00000062049	Bilateria	arhgap15	hmha1b	dre_Tcell	depleted_Myeloid
ENSDARG00000007783	ENSDARG00000102525	Euteleostomi	blk	lck	depleted_Tcell	depleted_Myeloid
ENSDARG00000004372	ENSDARG00000055713	Vertebrata	fmnl3	fmnl1a	depleted_Tcell	depleted_Myeloid
ENSDARG00000059246	ENSDARG00000007960	Euteleostomi	hnrnpd	hnrnpaba	depleted_NK	depleted_Myeloid
ENSDARG00000059246	ENSDARG00000036162	Bilateria	hnrnpd	hnrnpa0b	depleted_NK	depleted_Myeloid
ENSDARG00000059246	ENSDARG00000036161	Bilateria	hnrnpd	hnrnpa0l.1	depleted_NK	depleted_Myeloid
ENSDARG00000074161	ENSDARG00000076847	Chordata	tnrc6b	tnrc6c1	depleted_NK	depleted_Myeloid
