# Supplementary material for: Single-cell transcriptome analysis of fish immune cells provides insight into the evolution of vertebrate immune cell types
Source: Genome Res. 2017 Mar;27(3):451–61. doi: 10.1101/gr.207704.116 (PMC5340972; doi:10.1101/gr.207704.116)
Supplement: Supplemental Material [file supp_gr.207704.116_Supplemental_Table_S4.xlsx]

## Sheet: Zebrafish
Gene ID \ Species	pmarinus	lchalumnae	xtropicalis	acarolinensis	ggallus	ttruncatus	meugenii	mmusculus	rnorvegicus	ptroglodytes	hsapiens	pformosa	oniloticus	gmorhua	trubripes	tnigroviridis	amexicanus	Differential Expression	Transmembrane Domain	Gene Name	Description
ENSDARG00000000019	0	91	97	90	98	98	52	98	97	98	98	99	91	93	97	97	76	No.Diff.Exp	non-transmembrane	ube2h	ubiquitin-conjugating enzyme E2H (UBC8 homolog, yeast) [Source:ZFIN;Acc:ZDB-GENE-030616-67]
ENSDARG00000000068	0	49	42	19	44	47	36	46	47	46	46	53	53	39	48	20	56	No.Diff.Exp	non-transmembrane	slc9a3r1	solute carrier family 9, subfamily A (NHE3, cation proton antiporter 3), member 3 regulator 1 [Source:ZFIN;Acc:ZDB-GENE-031006-7]
ENSDARG00000000151	56.3333	83	82	73	81	65	64	78	73	47	74	84	85	82.5	0	81	0	No.Diff.Exp	non-transmembrane	thraa	thyroid hormone receptor alpha a [Source:ZFIN;Acc:ZDB-GENE-990415-263]
ENSDARG00000000183	59	20	65	73	74	72	51	73	73	72	72	62	74	71	74	73	72	No.Diff.Exp	non-transmembrane	ptpn4b	protein tyrosine phosphatase, non-receptor type 4b [Source:ZFIN;Acc:ZDB-GENE-030131-6259]
ENSDARG00000000189	16	56	54	29	31	41	39	40	40	41	41	80	81	65	75	72	87	No.Diff.Exp	transmembrane	sema6e	sema domain, transmembrane domain (TM), and cytoplasmic domain, (semaphorin) 6E [Source:ZFIN;Acc:ZDB-GENE-040724-119]
ENSDARG00000000394	0	14	12	13	13	12	8	7	12	12	12	21	26	21	20	23	36	No.Diff.Exp	non-transmembrane	matr3l1.1	matrin 3-like 1.1 [Source:ZFIN;Acc:ZDB-GENE-030616-40]
ENSDARG00000000460	0	0	0	0	0	0	0	0	0	0	0	0	0	0	0	0	28.7	dre_NK	transmembrane	nitr2b	novel immune-type receptor 2b [Source:ZFIN;Acc:ZDB-GENE-001106-6]
ENSDARG00000000656	0	65	49	40	0	63	33	63	63	63	63	79	79	61	0	75	83	dre_Tcell	non-transmembrane	psmb9a	proteasome (prosome, macropain) subunit, beta type, 9a [Source:ZFIN;Acc:ZDB-GENE-990415-140]
ENSDARG00000000690	46	52	45	47	36	25	38	47	47	42	47	65	61	63	59	50	39	No.Diff.Exp	transmembrane	sypl2b	synaptophysin-like 2b [Source:ZFIN;Acc:ZDB-GENE-050417-309]
ENSDARG00000000767	0	43.5	41	40	51	39	28	40.5	40.5	26	37.3333	56	56	56	50	49	69	dre_Myel	non-transmembrane	spi1b	Spi-1 proto-oncogene b [Source:ZFIN;Acc:ZDB-GENE-980526-164]
ENSDARG00000000906	0	51	55	58	59	50	54	58	58	59	59	64	64	59	58	64	72	dre_NK	non-transmembrane	skap2	src kinase associated phosphoprotein 2 [Source:ZFIN;Acc:ZDB-GENE-030616-438]
ENSDARG00000000966	17	46	49	51	51	43	46	50	49	41	51	40	55	55	57	45	68	No.Diff.Exp	non-transmembrane	ncor2	nuclear receptor corepressor 2 [Source:ZFIN;Acc:ZDB-GENE-030616-81]
ENSDARG00000001015	0	46	44	52	45	52	41	52	52	53	53	68	69	0	65	65	80	No.Diff.Exp	non-transmembrane	znf384l	zinc finger protein 384 like [Source:ZFIN;Acc:ZDB-GENE-030616-498]
ENSDARG00000001057	55	0	65	68	63	61	52	67	67	48	68	71	72	70	72	71	72	No.Diff.Exp	non-transmembrane	bysl	bystin-like [Source:ZFIN;Acc:ZDB-GENE-040426-1287]
ENSDARG00000001162	0	9	9	9	9	8	6	4.5	8	9	9	12	0	6	0	0	13	No.Diff.Exp	non-transmembrane	matr3l1.1	matrin 3-like 1.1 [Source:ZFIN;Acc:ZDB-GENE-030616-40]
ENSDARG00000001220	0	68	9.66667	77	73	77	56	79	75	78	78	91	91	88	90	89	95	No.Diff.Exp	non-transmembrane	mycbp2	MYC binding protein 2 [Source:ZFIN;Acc:ZDB-GENE-030616-132]
ENSDARG00000001241	26	50	78	78	70	78	48	79	79	78	78	81	82	68	81	81	67	No.Diff.Exp	non-transmembrane	puf60b	poly-U binding splicing factor b [Source:ZFIN;Acc:ZDB-GENE-040625-116]
ENSDARG00000001244	0	56	0	56	56	57	43	57	55	58	58	57	57	51	57	53	65	dre_Myel	non-transmembrane	srrm1	serine/arginine repetitive matrix 1 [Source:ZFIN;Acc:ZDB-GENE-040426-2789]
ENSDARG00000001303	0	74	65	62	0	59	69	69	68	67	67	80	84	38	37.25	74	85	No.Diff.Exp	non-transmembrane	psmb8a	proteasome (prosome, macropain) subunit, beta type, 8A [Source:ZFIN;Acc:ZDB-GENE-990415-141]
ENSDARG00000001470	0	22.1667	19.4074	21.5	0	0	0	0	0	0	0	42.3333	44.1429	35	29	43	33.55	No.Diff.Exp	transmembrane	mhc1zea	major histocompatibility complex class I ZEA [Source:ZFIN;Acc:ZDB-GENE-070705-176]
ENSDARG00000001498	0	0	38	22	25	49	47	49	48	51	51	59	64	39	62	60	76	No.Diff.Exp	non-transmembrane	skap1	src kinase associated phosphoprotein 1 [Source:ZFIN;Acc:ZDB-GENE-090721-1]
ENSDARG00000001621	56	68	68	68	54	64	44	69	69	69	69	75	0	72	72	74	76	No.Diff.Exp	non-transmembrane	nfyal	nuclear transcription factor Y, alpha, like [Source:ZFIN;Acc:ZDB-GENE-040718-491]
ENSDARG00000001656	54	0	0	0	0	0	0	0	0	0	0	67	69	0	67	66	74	No.Diff.Exp	non-transmembrane	psmb10	proteasome (prosome, macropain) subunit, beta type, 10 [Source:ZFIN;Acc:ZDB-GENE-001208-2]
ENSDARG00000001676	0	0	0	0	0	0	0	0	0	0	0	74	77	60	92	87	88	No.Diff.Exp	transmembrane	gpm6bb	glycoprotein M6Bb [Source:ZFIN;Acc:ZDB-GENE-030710-10]
ENSDARG00000001782	34	75	75	74	74	80	52	80	75	81	81	0	0	0	0	0	83	No.Diff.Exp	non-transmembrane	prkacba	protein kinase, cAMP-dependent, catalytic, beta a [Source:ZFIN;Acc:ZDB-GENE-040426-1351]
ENSDARG00000001788	0	60	70	71	71	63	63	61	64	61	53	85	86	74	80	83	90	No.Diff.Exp	non-transmembrane	atp5o	ATP synthase, H+ transporting, mitochondrial F1 complex, O subunit [Source:ZFIN;Acc:ZDB-GENE-050522-147]
ENSDARG00000001829	0	0	0	0	0	0	0	0	0	0	0	23	0	7	0	0	39	No.Diff.Exp	non-transmembrane	zgc:112982	zgc:112982 [Source:ZFIN;Acc:ZDB-GENE-050306-55]
ENSDARG00000001835	0	81	88	36	90	85	72	89	89	90	90	91	93	92	92	0	86	No.Diff.Exp	transmembrane	nalcn	sodium leak channel, non-selective [Source:ZFIN;Acc:ZDB-GENE-050410-12]
ENSDARG00000001870	37	86	88	88	87	86	54	87	87	87	88	92	91	70	88	92	16.5	No.Diff.Exp	transmembrane	atp1a1a.4	ATPase, Na+/K+ transporting, alpha 1a polypeptide, tandem duplicate 4 [Source:ZFIN;Acc:ZDB-GENE-001212-4]
ENSDARG00000001940	40	61	61	58	56	58	38	59	59	59	59	58	62	25	62	16	73	No.Diff.Exp	transmembrane	dnajc1	DnaJ (Hsp40) homolog, subfamily C, member 1 [Source:ZFIN;Acc:ZDB-GENE-061103-529]
ENSDARG00000002082	82	61	0	89	0	0	0	0	0	0	0	91	94	78	94	94	96	No.Diff.Exp	non-transmembrane	csnk2a1	casein kinase 2, alpha 1 polypeptide [Source:ZFIN;Acc:ZDB-GENE-990415-27]
ENSDARG00000002097	0	0	0	0	0	0	0	0	0	0	0	17	0	0	0	0	18	No.Diff.Exp	non-transmembrane	si:dkeyp-52c3.7	si:dkeyp-52c3.7 [Source:ZFIN;Acc:ZDB-GENE-110411-213]
ENSDARG00000002131	33	87	86	68	80	79	76	89	86	86	86	79	79	72	77	75	93	No.Diff.Exp	non-transmembrane	celf2	cugbp, Elav-like family member 2 [Source:ZFIN;Acc:ZDB-GENE-030826-35]
ENSDARG00000002165	0	59	56	37	0	52	56	59	57	52	52	76	75	63	69	68	34	No.Diff.Exp	non-transmembrane	psme1	proteasome (prosome, macropain) activator subunit 1 (PA28 alpha) [Source:ZFIN;Acc:ZDB-GENE-991110-17]
ENSDARG00000002168	65	79	77	77	78	77	54	77	66	77	77	78	81	77	77	40	84	No.Diff.Exp	non-transmembrane	tra2b	transformer 2 beta homolog (Drosophila) [Source:ZFIN;Acc:ZDB-GENE-040426-1094]
ENSDARG00000002194	0	31	36	37	35	35	0	35	34	20.6667	31.5	53	53	53	51	51	46	No.Diff.Exp	transmembrane	rhd	Rh blood group, D antigen [Source:ZFIN;Acc:ZDB-GENE-051213-1]
ENSDARG00000002215	57	70	58	32	68	74	40	71	71	74	75	78	78	80	55	79	92	No.Diff.Exp	non-transmembrane	rtca	RNA 3'-terminal phosphate cyclase [Source:ZFIN;Acc:ZDB-GENE-030131-9687]
ENSDARG00000002217	84	90	94	94	93	90	84	94	94	94	94	0	0	86	89	0	98	No.Diff.Exp	non-transmembrane	scocb	short coiled-coil protein b [Source:ZFIN;Acc:ZDB-GENE-041010-41]
ENSDARG00000002240	0	66	25	74	0	73	68	73	72	73	73	74	75	73	78	53	78	No.Diff.Exp	non-transmembrane	psmb6	proteasome (prosome, macropain) subunit, beta type, 6 [Source:ZFIN;Acc:ZDB-GENE-990415-216]
ENSDARG00000002264	0	67	60	0	61	57	0	62	62.5	61	61	43	68	68	62	63	79	No.Diff.Exp	non-transmembrane	mrpl41	mitochondrial ribosomal protein L41 [Source:ZFIN;Acc:ZDB-GENE-050522-200]
ENSDARG00000002271	0	71	70	69	68	70	65	71	72	0	71	65	69	55	62	65	80	No.Diff.Exp	non-transmembrane	zfand5b	zinc finger, AN1-type domain 5b [Source:ZFIN;Acc:ZDB-GENE-040426-875]
ENSDARG00000002293	39.5	0	0	0	0	0	0	0	0	0	0	44.2	50	0	25.5	0	0	dre_Tcell	non-transmembrane	si:ch211-197g15.9	si:ch211-197g15.9 [Source:ZFIN;Acc:ZDB-GENE-050208-616]
ENSDARG00000002344	0	0	0	0	0	0	93	0	0	0	0	0	0	0	0	0	100	No.Diff.Exp	non-transmembrane	tubb4b	tubulin, beta 4B class IVb [Source:ZFIN;Acc:ZDB-GENE-030131-8625]
ENSDARG00000002369	83	0	50	0	66	99	0	0	0	83	75	0	0	0	0	0	81	No.Diff.Exp	non-transmembrane	UBC	ubiquitin C [Source:HGNC Symbol;Acc:HGNC:12468]
ENSDARG00000002396	0	0	0	72	0	0	0	0	0	0	0	74	74	71	75	75	33.5	No.Diff.Exp	non-transmembrane	cry-dash	cryptochrome DASH [Source:ZFIN;Acc:ZDB-GENE-040617-2]
ENSDARG00000002405	0	67	0	0	0	0	0	0	0	0	0	65	69	61	58	57	61	No.Diff.Exp	transmembrane	si:ch211-225b11.1	si:ch211-225b11.1 [Source:ZFIN;Acc:ZDB-GENE-060531-39]
ENSDARG00000002523	15	78	72	73	72	71	57	71	71	70	70	76	77	30	76	74	52.5	No.Diff.Exp	non-transmembrane	hsdl2	hydroxysteroid dehydrogenase like 2 [Source:ZFIN;Acc:ZDB-GENE-030131-1066]
ENSDARG00000002538	0	90	90	96	96	88	0	96	96	96	96	96	96	95	95	95	96	No.Diff.Exp	non-transmembrane	smu1a	smu-1 suppressor of mec-8 and unc-52 homolog a (C. elegans) [Source:ZFIN;Acc:ZDB-GENE-040426-916]
ENSDARG00000002576	39	78	0	76	0	75	48	75	76	74	78	0	85	82	87	87	91	No.Diff.Exp	non-transmembrane	cabp5a	calcium binding protein 5a [Source:ZFIN;Acc:ZDB-GENE-040426-1655]
ENSDARG00000002591	56	80	87	91	91	66	78	52	91	92	92	95	96	93	93	10	97	No.Diff.Exp	non-transmembrane	ruvbl1	RuvB-like AAA ATPase 1 [Source:ZFIN;Acc:ZDB-GENE-030109-2]
ENSDARG00000002632	52	58	54	60	60	0	52	59	60	0	60	80	74	62	81	81	71	No.Diff.Exp	non-transmembrane	anxa11b	annexin A11b [Source:ZFIN;Acc:ZDB-GENE-030707-5]
ENSDARG00000002701	27	73	27	68	66	64	66	68	68	67	67	64	27	23	27	19	89	No.Diff.Exp	non-transmembrane	rasl12	RAS-like, family 12 [Source:ZFIN;Acc:ZDB-GENE-040426-1201]
ENSDARG00000002710	33	40	42	50	39	48	48	48	49	49	49	61	57	42	58	46	64	No.Diff.Exp	non-transmembrane	ncl	nucleolin [Source:ZFIN;Acc:ZDB-GENE-030131-6986]
ENSDARG00000002758	24	41	41	24	0	35	0	41	40	41	41	30	30	47	54	51	67	No.Diff.Exp	non-transmembrane	dedd1	death effector domain-containing 1 [Source:ZFIN;Acc:ZDB-GENE-000616-2]
ENSDARG00000002787	63.3333	90	57.6667	88	83	89	89	90	89	89	89	93	95	84	92	94	97	No.Diff.Exp	non-transmembrane	tle3a	transducin-like enhancer of split 3a [Source:ZFIN;Acc:ZDB-GENE-990415-86]
ENSDARG00000002790	0	93	96	97	97	91	96	96	96	96	96	67	98	96	97	98	33	No.Diff.Exp	non-transmembrane	ap2m1a	adaptor-related protein complex 2, mu 1 subunit, a [Source:ZFIN;Acc:ZDB-GENE-030131-9784]
ENSDARG00000002791	37	87	89	89	88	87	55	88	88	89	89	0	0	0	0	0	0	No.Diff.Exp	transmembrane	atp1a1a.1	ATPase, Na+/K+ transporting, alpha 1a polypeptide, tandem duplicate 1 [Source:ZFIN;Acc:ZDB-GENE-001212-1]
ENSDARG00000002897	45	40	44	54	0	26	46	47	47	46	46	65	66	62	64	64	75	No.Diff.Exp	non-transmembrane	INPP1	inositol polyphosphate-1-phosphatase [Source:HGNC Symbol;Acc:HGNC:6071]
ENSDARG00000002912	0	82	81	80	81	80	70	80	80	81	81	90	93	89	87	90	92	No.Diff.Exp	transmembrane	adipor1a	adiponectin receptor 1a [Source:ZFIN;Acc:ZDB-GENE-040718-169]
ENSDARG00000002949	0	100	100	91	99	99	100	100	100	100	100	98	98	98.5	84.5	97	99	No.Diff.Exp	non-transmembrane	ppp6c	protein phosphatase 6, catalytic subunit [Source:ZFIN;Acc:ZDB-GENE-040426-949]
ENSDARG00000002956	0	33.6667	26.5	34.5	0	27.6667	31	35	35	30.3333	35.3333	34	44.6667	0	44	40	49	dre_Myel	transmembrane	si:dkey-32n7.4	si:dkey-32n7.4 [Source:ZFIN;Acc:ZDB-GENE-110411-175]
ENSDARG00000002970	34	51	75	74	73	72	8	77	77	79	78	85	88	87	86	86	88	No.Diff.Exp	non-transmembrane	ss18	synovial sarcoma translocation, chromosome 18 (H. sapiens) [Source:ZFIN;Acc:ZDB-GENE-030131-4867]
ENSDARG00000003032	0	88	91	65	0	89	79	89	89	89	89	92	93	90	0	0	0	No.Diff.Exp	non-transmembrane	eif4a1b	eukaryotic translation initiation factor 4A1B [Source:ZFIN;Acc:ZDB-GENE-040120-6]
ENSDARG00000003035	84	0	78	86	86	85	0	85	85	86	86	89	90	88	88	0	90	No.Diff.Exp	non-transmembrane	hspa9	heat shock protein 9 [Source:ZFIN;Acc:ZDB-GENE-030828-12]
ENSDARG00000003058	31	43	37	33	33	26	30	35	35	36	36	43	46	16.5	32	30	54	No.Diff.Exp	non-transmembrane	fgfr1op	FGFR1 oncogene partner [Source:ZFIN;Acc:ZDB-GENE-090417-1]
ENSDARG00000003098	36.5	59	7	61	61	54	48	62	62	63	63	69	69	65	42	27	77	No.Diff.Exp	non-transmembrane	kdm5bb	lysine (K)-specific demethylase 5Bb [Source:ZFIN;Acc:ZDB-GENE-030424-1]
ENSDARG00000003113	0	26	65.5	66	64	63	46	64	63	64	65	73	70	70	73	72	67	No.Diff.Exp	non-transmembrane	ada	adenosine deaminase [Source:ZFIN;Acc:ZDB-GENE-040718-393]
ENSDARG00000003127	0	58	48	58	53	54	28	53	52	53	53	62	58	52	55	59	79	dre_NK	non-transmembrane	zgc:123105	zgc:123105 [Source:ZFIN;Acc:ZDB-GENE-051113-272]
ENSDARG00000003145	0	54	46	51	50	49	33	49	49	50	50	70	68	68	73	72	73	No.Diff.Exp	transmembrane	CLMP	CXADR-like membrane protein [Source:HGNC Symbol;Acc:HGNC:24039]
ENSDARG00000003151	0	95	99	99	99	99	0	99	99	93	66	99	99	99	98	98	100	No.Diff.Exp	non-transmembrane	skp1	S-phase kinase-associated protein 1 [Source:ZFIN;Acc:ZDB-GENE-040426-1707]
ENSDARG00000003153	86	96	97	96	97	97	97	97	97	97	97	95	95	89	95	96	98	No.Diff.Exp	non-transmembrane	cpsf5	cleavage and polyadenylation specific factor 5 [Source:ZFIN;Acc:ZDB-GENE-040426-1316]
ENSDARG00000003157	0	48	0	33	0	34	33	33	34	26	34	53	54	57	60	53	68	No.Diff.Exp	non-transmembrane	nfkbil1	nuclear factor of kappa light polypeptide gene enhancer in B-cells inhibitor-like 1 [Source:ZFIN;Acc:ZDB-GENE-040116-7]
ENSDARG00000003189	58	68	88	89	74	86	77	49.5	91	91	91	94	94	70	93	84	96	No.Diff.Exp	transmembrane	psmd1	proteasome (prosome, macropain) 26S subunit, non-ATPase, 1 [Source:ZFIN;Acc:ZDB-GENE-040426-810]
ENSDARG00000003205	0	56	0	57	55	49	0	55	55	57	57	62	0	60	62	63	56	No.Diff.Exp	non-transmembrane	ngly1	N-glycanase 1 [Source:ZFIN;Acc:ZDB-GENE-050522-535]
ENSDARG00000003235	29	61	60	24	63	64	59	64	64	65	65	70	74	61	0	0	85	No.Diff.Exp	non-transmembrane	nup88	nucleoporin 88 [Source:ZFIN;Acc:ZDB-GENE-050522-297]
ENSDARG00000003244	8.4	0	21.3333	23	15.6	24.5	21	23.4167	21.375	24.5714	24.4286	0	0	0	0	0	29	No.Diff.Exp	non-transmembrane	gbp3	guanylate binding protein 3 [Source:ZFIN;Acc:ZDB-GENE-070912-176]
ENSDARG00000003250	15	58	0	64	69	65	65	69	63	68	70	78	79	72	78	79	62	No.Diff.Exp	non-transmembrane	pik3cd	phosphatidylinositol-4,5-bisphosphate 3-kinase, catalytic subunit delta [Source:ZFIN;Acc:ZDB-GENE-040426-1128]
ENSDARG00000003269	60.5	88	85	87	87	79	77	87	87	87	87	91	89	89	90	90	93	No.Diff.Exp	transmembrane	clcn3	chloride channel 3 [Source:ZFIN;Acc:ZDB-GENE-030131-1699]
ENSDARG00000003308	73	85	78	85	85	85	0	84	75	85	85	83	89	88	90	83	95	No.Diff.Exp	non-transmembrane	emc2	ER membrane protein complex subunit 2 [Source:ZFIN;Acc:ZDB-GENE-040625-82]
ENSDARG00000003311	61.5	68	66	67	69	70	57	69	69	71	70	72	75	67	75	73	79	No.Diff.Exp	non-transmembrane	pank2	pantothenate kinase 2 [Source:ZFIN;Acc:ZDB-GENE-070112-1952]
ENSDARG00000003380	41	55	48	49	47	48	50	48	45	35	49	53.5	58	55	56	52.5	73	No.Diff.Exp	non-transmembrane	PAOX	polyamine oxidase (exo-N4-amino) [Source:HGNC Symbol;Acc:HGNC:20837]
ENSDARG00000003382	0	38	51	55	54	54	53	56	56	56	56	67	67	56	61	63	0	No.Diff.Exp	non-transmembrane	cwc25	CWC25 spliceosome-associated protein homolog (S. cerevisiae) [Source:ZFIN;Acc:ZDB-GENE-040426-2817]
ENSDARG00000003429	0	44	76	78	78	74	63	61.5	61	79	79	0	0	0	0	0	88	No.Diff.Exp	non-transmembrane	hnrpdl	heterogeneous nuclear ribonucleoprotein D-like [Source:ZFIN;Acc:ZDB-GENE-040426-2717]
ENSDARG00000003486	85	0	66	0	0	0	0	0	0	0	0	97	98	91	98	97	99	No.Diff.Exp	non-transmembrane	ppp1caa	protein phosphatase 1, catalytic subunit, alpha isozyme a [Source:ZFIN;Acc:ZDB-GENE-040516-3]
ENSDARG00000003519	0	33	63	61	58	51	51	54	56	55	55	69	74	63	68	33.5	51	No.Diff.Exp	non-transmembrane	aprt	adenine phosphoribosyltransferase [Source:ZFIN;Acc:ZDB-GENE-040426-1492]
ENSDARG00000003526	93	96	66	0	94	96	87	95	96	83	96	100	90	98	99	98	99	No.Diff.Exp	non-transmembrane	psma5	proteasome (prosome, macropain) subunit, alpha type, 5 [Source:ZFIN;Acc:ZDB-GENE-040625-96]
ENSDARG00000003527	0	76	76	73	70	72	74	76	76	74	74	75	80	77	78	31.5	82	No.Diff.Exp	non-transmembrane	mak16	MAK16 homolog (S. cerevisiae) [Source:ZFIN;Acc:ZDB-GENE-020419-35]
ENSDARG00000003564	54	73	56	0	64	58	68	64	64	65	65	52	79	37	74	71	85	No.Diff.Exp	non-transmembrane	dohh	deoxyhypusine hydroxylase/monooxygenase [Source:ZFIN;Acc:ZDB-GENE-030131-451]
ENSDARG00000003592	0	61	12	44	61	59	42	59	58	57	57	64	66	61	61	64	69	No.Diff.Exp	non-transmembrane	surf1	surfeit 1 [Source:ZFIN;Acc:ZDB-GENE-041108-2]
ENSDARG00000003599	53	82	91	89	91	89	89	89	90	75	90	92	91	83	92	93	90	No.Diff.Exp	non-transmembrane	rpl3	ribosomal protein L3 [Source:ZFIN;Acc:ZDB-GENE-030131-1291]
ENSDARG00000003631	25	63	59	63	64	61	50	62	61	62	62	72	73	64	69	66	79	No.Diff.Exp	non-transmembrane	clockb	clock circadian regulator b [Source:ZFIN;Acc:ZDB-GENE-030408-2]
ENSDARG00000003641	0	62	65	48	67	68	46	68	69	68	68	75	75	51	75	76	30	No.Diff.Exp	non-transmembrane	tfg	trk-fused gene [Source:ZFIN;Acc:ZDB-GENE-030131-8410]
ENSDARG00000003681	26	79	46	77	76	63	64	76	76	75	75	90	90	79	88	86	93	dre_Tcell	non-transmembrane	eif5	eukaryotic translation initiation factor 5 [Source:ZFIN;Acc:ZDB-GENE-030131-975]
ENSDARG00000003693	20	47.5	55	69	74	66	52	65.5	66	67.5	67	82	78	69	78	71	84	No.Diff.Exp	non-transmembrane	hars	histidyl-tRNA synthetase [Source:ZFIN;Acc:ZDB-GENE-040912-152]
ENSDARG00000003776	0	50	85	87	71	85	76	87	29	77	87	92	93	93	93	52	89	No.Diff.Exp	non-transmembrane	pip4k2aa	phosphatidylinositol-5-phosphate 4-kinase, type II, alpha a [Source:ZFIN;Acc:ZDB-GENE-080721-18]
ENSDARG00000003795	0	52	67	63	66	61	61	64	64	65	64	65	71	69	70	71	72	No.Diff.Exp	non-transmembrane	IDH2	isocitrate dehydrogenase 2 (NADP+), mitochondrial [Source:HGNC Symbol;Acc:HGNC:5383]
ENSDARG00000003854	17	68	69	67	67	58	41	65	65	66	66	39	46.5	69	25	33.5	68	No.Diff.Exp	non-transmembrane	acsl1b	acyl-CoA synthetase long-chain family member 1b [Source:ZFIN;Acc:ZDB-GENE-040801-88]
ENSDARG00000003860	64	57	79	80	78	79	0	79	51.2	79	79	79	79	79	76	53	66	No.Diff.Exp	non-transmembrane	cbx3a	chromobox homolog 3a (HP1 gamma homolog, Drosophila) [Source:ZFIN;Acc:ZDB-GENE-030131-1158]
ENSDARG00000003866	0	73	72	82	83	83	60	83	83	83	83	0	0	82	0	84	87	No.Diff.Exp	transmembrane	tm9sf2	transmembrane 9 superfamily member 2 [Source:ZFIN;Acc:ZDB-GENE-030131-6302]
ENSDARG00000003904	0	27	0	13	29	26	19	28	26	29	29	0	29	24	27	26	46	No.Diff.Exp	non-transmembrane	sycp1	synaptonemal complex protein 1 [Source:ZFIN;Acc:ZDB-GENE-040910-6]
ENSDARG00000003920	0	58	90	27	93	87	72	87	77	87	85	89	90	72.5	87	74	97	No.Diff.Exp	non-transmembrane	setb	SET translocation (myeloid leukemia-associated) B [Source:ZFIN;Acc:ZDB-GENE-030131-433]
ENSDARG00000003938	18.5	49	66	56	62	63	55	64	64	64	64	73	76	70	71	73	79	No.Diff.Exp	non-transmembrane	rpa1	replication protein A1 [Source:ZFIN;Acc:ZDB-GENE-030912-3]
ENSDARG00000003941	56	70	0	0	0	0	0	62	62	54	63	71	69	0	72	72	73	No.Diff.Exp	non-transmembrane	rrs1	RRS1 ribosome biogenesis regulator homolog (S. cerevisiae) [Source:ZFIN;Acc:ZDB-GENE-030131-9345]
ENSDARG00000004034	0	56	60	60	62	52	60	56	63	53	59	57	68	49	0	0	87	No.Diff.Exp	non-transmembrane	arhgdig	Rho GDP dissociation inhibitor (GDI) gamma [Source:ZFIN;Acc:ZDB-GENE-040426-1493]
ENSDARG00000004074	9	61	52	59	59	58	52	58	58	57	60	69	70	32	57	64	65	No.Diff.Exp	non-transmembrane	bach2b	BTB and CNC homology 1, basic leucine zipper transcription factor 2b [Source:ZFIN;Acc:ZDB-GENE-041001-139]
ENSDARG00000004160	40	66	57	59	64	63	63	67	67	64	66	77	73	73	74	67	75	No.Diff.Exp	transmembrane	reep3b	receptor accessory protein 3b [Source:ZFIN;Acc:ZDB-GENE-040426-730]
ENSDARG00000004161	25	85	68	71	85	73	54	84	2	0	84	60	81	74	82	82	75	No.Diff.Exp	non-transmembrane	ik	IK cytokine [Source:ZFIN;Acc:ZDB-GENE-030131-960]
ENSDARG00000004173	19	87	82	14	87	85	70	87	87	87	87	93	94	89	93	81	96	No.Diff.Exp	non-transmembrane	copa	coatomer protein complex, subunit alpha [Source:ZFIN;Acc:ZDB-GENE-020905-2]
ENSDARG00000004174	80	91	86	82	48.5	84	76	89	91	91	91	92	94	85	50.5	93	96	No.Diff.Exp	non-transmembrane	cnot1	CCR4-NOT transcription complex, subunit 1 [Source:ZFIN;Acc:ZDB-GENE-040915-1]
ENSDARG00000004189	61	69	69	67	41.5	0	33	68	68	68	68	0	0	0	0	0	71	No.Diff.Exp	non-transmembrane	cbx1a	chromobox homolog 1a (HP1 beta homolog Drosophila) [Source:ZFIN;Acc:ZDB-GENE-030131-4945]
ENSDARG00000004297	0	76	68	0	61	72	0	74	74	74	73	0	0	0	0	0	0	No.Diff.Exp	non-transmembrane	irf2bpl	interferon regulatory factor 2 binding protein-like [Source:ZFIN;Acc:ZDB-GENE-040426-1968]
ENSDARG00000004301	0	79	0	80	79	0	0	80	80	80	80	83	83	76	85	84	90	dre_Myel	non-transmembrane	rhogb	ras homolog family member Gb [Source:ZFIN;Acc:ZDB-GENE-030131-8877]
ENSDARG00000004372	28	69	63	67	0	68	62	69	66	68	68	80	81	74	78	73	13	No.Diff.Exp	non-transmembrane	fmnl3	formin-like 3 [Source:ZFIN;Acc:ZDB-GENE-030131-1571]
ENSDARG00000004378	0	0	0	0	0	0	0	0	0	0	0	80	87	80	87	87	91	dre_NK	non-transmembrane	yrk	Yes-related kinase [Source:ZFIN;Acc:ZDB-GENE-030131-9517]
ENSDARG00000004452	42.5	75	77	0	76	77	73	77	61	76	76	0	0	0	0	0	69	No.Diff.Exp	non-transmembrane	tardbpl	TAR DNA binding protein, like [Source:ZFIN;Acc:ZDB-GENE-031030-1]
ENSDARG00000004455	39	42	51	36	50	28	27	48	48	43	43	56	55	53	51	54	24	No.Diff.Exp	transmembrane	p2rx5	purinergic receptor P2X, ligand-gated ion channel, 5 [Source:ZFIN;Acc:ZDB-GENE-030319-5]
ENSDARG00000004470	18	52	57	58	0	27	51	59	59	54	60	67	70	67	67	65	69	No.Diff.Exp	transmembrane	prkcsh	protein kinase C substrate 80K-H [Source:ZFIN;Acc:ZDB-GENE-040426-770]
ENSDARG00000004473	10	51	0	40	0	33	34	41	41	41	41	72	72	38	60	57	72	No.Diff.Exp	non-transmembrane	tbx21	T-box 21 [Source:ZFIN;Acc:ZDB-GENE-080104-3]
ENSDARG00000004497	0	43	66	0	0	60	61	67	67	67	67	55	66	62	66	66	44	No.Diff.Exp	transmembrane	tspan33a	tetraspanin 33a [Source:ZFIN;Acc:ZDB-GENE-040718-361]
ENSDARG00000004527	0	81	87	68	77	81	80	84	84	0	84	90	90	78	90	89	97	No.Diff.Exp	non-transmembrane	pin4	protein (peptidylprolyl cis/trans isomerase) NIMA-interacting, 4 (parvulin) [Source:ZFIN;Acc:ZDB-GENE-050522-117]
ENSDARG00000004537	7	43	42	44	44	45	40	47	46	47	47	59	61	55	59	6	60	No.Diff.Exp	non-transmembrane	kmt2a	lysine (K)-specific methyltransferase 2A [Source:ZFIN;Acc:ZDB-GENE-080521-3]
ENSDARG00000004587	70	70	61	70	40	68	73	77	73	77	77	88	87	0	0	0	0	No.Diff.Exp	non-transmembrane	kat5a	K(lysine) acetyltransferase 5a [Source:ZFIN;Acc:ZDB-GENE-040718-57]
ENSDARG00000004702	0	60	52	3	3	10	44	48	47	43	49	68	65	45	50	37	63	No.Diff.Exp	non-transmembrane	irf2bp2a	interferon regulatory factor 2 binding protein 2a [Source:ZFIN;Acc:ZDB-GENE-030131-7809]
ENSDARG00000004706	0	77	76	58.5	79	79	0	79	79	78	79	82	86	80	79	79	86	No.Diff.Exp	non-transmembrane	syf2	SYF2 pre-mRNA-splicing factor [Source:ZFIN;Acc:ZDB-GENE-040801-170]
ENSDARG00000004735	33	50	51	52	47	33	52	54	53	49	55	58	57	56	54	56	67	No.Diff.Exp	non-transmembrane	hnrnpub	heterogeneous nuclear ribonucleoprotein Ub [Source:ZFIN;Acc:ZDB-GENE-030131-6422]
ENSDARG00000004757	0	70	69	0	64	67	33	71	70.5	70	71	81	74	74	80	72	90	No.Diff.Exp	non-transmembrane	ybx1	Y box binding protein 1 [Source:ZFIN;Acc:ZDB-GENE-000629-3]
ENSDARG00000004771	18	50	47	35	51	36	49	47	47	48	48	56	54	47	52	47	64	No.Diff.Exp	non-transmembrane	ankrd10b	ankyrin repeat domain 10b [Source:ZFIN;Acc:ZDB-GENE-061013-49]
ENSDARG00000004830	75	77	61	75	58	71	77	79	79	79	79	89	90	84	89	89	91	dre_Tcell	non-transmembrane	flot2a	flotillin 2a [Source:ZFIN;Acc:ZDB-GENE-020430-3]
ENSDARG00000004836	0	0	0	78	78	67	46	77	77	78	78	50	79	62	74	0	84	No.Diff.Exp	non-transmembrane	dnajc5ab	DnaJ (Hsp40) homolog, subfamily C, member 5ab [Source:ZFIN;Acc:ZDB-GENE-081021-2]
ENSDARG00000004840	14	56	52	40	0	50	44	51	51	52	52	62	64	55	63	59	68	No.Diff.Exp	non-transmembrane	rassf1	Ras association (RalGDS/AF-6) domain family 1 [Source:ZFIN;Acc:ZDB-GENE-040912-14]
ENSDARG00000004875	25	43	39	40	32	36	35	43	36	38	44	53	54	40	47	53	63	No.Diff.Exp	transmembrane	TMC6 (1 of 2)	transmembrane channel-like 6 [Source:HGNC Symbol;Acc:HGNC:18021]
ENSDARG00000004906	72	65	79	79	39	78	75	79	79	80	80	88	89	82	83	83	93	No.Diff.Exp	non-transmembrane	stip1	stress-induced phosphoprotein 1 [Source:ZFIN;Acc:ZDB-GENE-041121-17]
ENSDARG00000004948	0	59	46	61	56	45	0	55	54	44	45	64	66	59	68	68	64	No.Diff.Exp	non-transmembrane	bccip	BRCA2 and CDKN1A interacting protein [Source:ZFIN;Acc:ZDB-GENE-050320-39]
ENSDARG00000004979	62	53	73	74	75	36	44	72	73	72	72	71	74	64	63	65	82	No.Diff.Exp	transmembrane	elovl5	ELOVL fatty acid elongase 5 [Source:ZFIN;Acc:ZDB-GENE-040407-2]
ENSDARG00000005128	0	46	56	51	46	41	51	48	48	48	47	69	71	61	70	69	70	No.Diff.Exp	non-transmembrane	rnaseh2b	ribonuclease H2, subunit B [Source:ZFIN;Acc:ZDB-GENE-040426-1090]
ENSDARG00000005159	83	0	0	0	0	60	0	93	92	93	93	97	99	83	95	96	0	No.Diff.Exp	non-transmembrane	cyth3b	cytohesin 3b [Source:ZFIN;Acc:ZDB-GENE-130530-529]
ENSDARG00000005162	57	83	68	43.5	87	76	79	0	87	88	88	89	89	89	88	20	91	No.Diff.Exp	non-transmembrane	tpm3	tropomyosin 3 [Source:ZFIN;Acc:ZDB-GENE-030826-16]
ENSDARG00000005185	0	68	61	66	68	63	54	64	63	0	65	81	83	71	82	13	86	No.Diff.Exp	transmembrane	cpn1	carboxypeptidase N, polypeptide 1 [Source:ZFIN;Acc:ZDB-GENE-030131-9116]
ENSDARG00000005186	0	58	65	61	66	63	56	67	66	66	66	64	65	60	65	63	81	No.Diff.Exp	non-transmembrane	sp4	sp4 transcription factor [Source:ZFIN;Acc:ZDB-GENE-031202-3]
ENSDARG00000005191	82	86	90	87	85	86	0	86	85	86	86	93	93	89	91	93	94	No.Diff.Exp	non-transmembrane	ahcy	adenosylhomocysteinase [Source:ZFIN;Acc:ZDB-GENE-031219-6]
ENSDARG00000005216	35	43	0	35	49	0	0	21	0	0	0	54	59	49	0	0	0	No.Diff.Exp	transmembrane	zgc:158328	zgc:158328 [Source:ZFIN;Acc:ZDB-GENE-070112-1202]
ENSDARG00000005220	0	57	84	79	83	0	0	83	82	84	83	92	92	94	90	0	97	No.Diff.Exp	non-transmembrane	pdcd6	programmed cell death 6 [Source:ZFIN;Acc:ZDB-GENE-040426-1307]
ENSDARG00000005230	0	54	73	0	77	65	67	76	76	76	76	82	81	81	79	81	87	No.Diff.Exp	transmembrane	ssr2	signal sequence receptor, beta [Source:ZFIN;Acc:ZDB-GENE-010413-1]
ENSDARG00000005236	19	31	19	14	0	29	29	33.5	33	34	33	44	35	31	36	33	37	No.Diff.Exp	non-transmembrane	srcap	Snf2-related CREBBP activator protein [Source:ZFIN;Acc:ZDB-GENE-041008-127]
ENSDARG00000005315	30	50	77	80	79	78	79	79	77	0	79	15	84	84	66	0	87	No.Diff.Exp	non-transmembrane	celf1	cugbp, Elav-like family member 1 [Source:ZFIN;Acc:ZDB-GENE-000501-1]
ENSDARG00000005318	0	65	63	64	56	61	44	59	59	62	62	73	72	43	66	63	81	No.Diff.Exp	non-transmembrane	stam2	signal transducing adaptor molecule (SH3 domain and ITAM motif) 2 [Source:ZFIN;Acc:ZDB-GENE-041114-64]
ENSDARG00000005350	8	81	75	76	81	80	56	79	79	80	80	87	84	87	87	89	87	No.Diff.Exp	non-transmembrane	dip2ba	disco-interacting protein 2 homolog Ba [Source:ZFIN;Acc:ZDB-GENE-040426-2305]
ENSDARG00000005414	0	29	56	54	62	59	50	57	58	0	45.5	36	64	61	61	61	82	dre_NK	non-transmembrane	grapa	GRB2-related adaptor protein a [Source:ZFIN;Acc:ZDB-GENE-050522-347]
ENSDARG00000005423	79	73	91	87	74	69	46	90	77.5	90	88.5	93	92	89	91	91	96	No.Diff.Exp	non-transmembrane	pgam1a	phosphoglycerate mutase 1a [Source:ZFIN;Acc:ZDB-GENE-030131-1827]
ENSDARG00000005451	66.5	70	86	87	91	77	54	88	88	89	88	90	91	88	84	84	95	No.Diff.Exp	non-transmembrane	gdi2	GDP dissociation inhibitor 2 [Source:ZFIN;Acc:ZDB-GENE-030131-2485]
ENSDARG00000005481	0	46	47	49	43	50	27	50	49	49	49	55	58	57	56	56	70	No.Diff.Exp	non-transmembrane	nfkbiaa	nuclear factor of kappa light polypeptide gene enhancer in B-cells inhibitor, alpha a [Source:ZFIN;Acc:ZDB-GENE-040426-2227]
ENSDARG00000005513	16	19	19	17	16	11	18	32	29	18	22	20	19	22	19	21	20	No.Diff.Exp	non-transmembrane	naca	nascent polypeptide-associated complex alpha subunit [Source:ZFIN;Acc:ZDB-GENE-020423-4]
ENSDARG00000005551	62	84	79	81	81	71	46	73.3333	73	70.5	73	0	0	0	0	0	89	dre_NK	non-transmembrane	hnrnph1l	heterogeneous nuclear ribonucleoprotein H1, like [Source:ZFIN;Acc:ZDB-GENE-030131-275]
ENSDARG00000005576	14	40	38	31	38	38	19	39	38.5	41	40	44	44	40	41	39	58	No.Diff.Exp	non-transmembrane	mphosph8	M-phase phosphoprotein 8 [Source:ZFIN;Acc:ZDB-GENE-050309-191]
ENSDARG00000005586	0	60	64	66	66	53	62	66	66	66	66	73	74	32	65	66	85	No.Diff.Exp	non-transmembrane	zbtb20	zinc finger and BTB domain containing 20 [Source:ZFIN;Acc:ZDB-GENE-070112-1992]
ENSDARG00000005627	0	38	31.4444	31.6667	22.6	33.75	28.7778	33.0833	30	34.5714	34.5714	0	0	0	0	0	0	No.Diff.Exp	transmembrane	CABZ01068209.1
ENSDARG00000005652	25	46	58	76	63	55	65	72	72	73	72	85	84	76	35	39.5	75	No.Diff.Exp	transmembrane	man1a1	mannosidase, alpha, class 1A, member 1 [Source:ZFIN;Acc:ZDB-GENE-041014-321]
ENSDARG00000005675	92	84.5	96	95	95	91	71	96	96	95	96	97	97	96	97	97	97	No.Diff.Exp	transmembrane	sec61a1l	Sec61 translocon alpha 1 subunit, like [Source:ZFIN;Acc:ZDB-GENE-021016-2]
ENSDARG00000005713	57	38	58	59	22	54	51	56	56	53	55	63	64.5	57	63	54.5	31	No.Diff.Exp	non-transmembrane	ethe1	ethylmalonic encephalopathy 1 [Source:ZFIN;Acc:ZDB-GENE-040426-2503]
ENSDARG00000005738	0	74	71	70	70	71	0	71	71	70	70	78	78	77	0	78	78	No.Diff.Exp	non-transmembrane	rpf1	ribosome production factor 1 homolog [Source:ZFIN;Acc:ZDB-GENE-040625-177]
ENSDARG00000005739	0	59	72	72	71	72	0	73	61	73	73	0	0	0	0	0	52	No.Diff.Exp	transmembrane	gpm6ba	glycoprotein M6Ba [Source:ZFIN;Acc:ZDB-GENE-030710-9]
ENSDARG00000005772	38	0	52	49	0	26.5	29	43	43	0	43	47	48	30	44	39	65	No.Diff.Exp	non-transmembrane	tsr2	TSR2, 20S rRNA accumulation, homolog (S. cerevisiae) [Source:ZFIN;Acc:ZDB-GENE-021231-2]
ENSDARG00000005774	59	70	74	73	72	72	66	72.6667	72	72	73	83	84	0	80	79	85	No.Diff.Exp	non-transmembrane	ddx3b	DEAD (Asp-Glu-Ala-Asp) box helicase 3b [Source:ZFIN;Acc:ZDB-GENE-980526-150]
ENSDARG00000005791	69	46	78	69.5	0	78	33	78	67.6	69	69	78	80	79	80	80	80	No.Diff.Exp	non-transmembrane	rpl28	ribosomal protein L28 [Source:ZFIN;Acc:ZDB-GENE-040930-10]
ENSDARG00000005840	75	66	75	79	77	43	66	78	79	77	77	81	81	82	83	53	0	No.Diff.Exp	non-transmembrane	got2b	glutamic-oxaloacetic transaminase 2b, mitochondrial [Source:ZFIN;Acc:ZDB-GENE-030131-7917]
ENSDARG00000005841	49	54	63	61	60	50	50	57	57	55	56	66	66	62	66	66	85	dre_Myel	non-transmembrane	tnni2a.2	troponin I type 2a (skeletal, fast), tandem duplicate 2 [Source:ZFIN;Acc:ZDB-GENE-040426-970]
ENSDARG00000005908	0	50	52	54.5	54.5	55.5	54	58	50	58	58	45	0	49	49	36	69	No.Diff.Exp	non-transmembrane	clk4b	CDC-like kinase 4b [Source:ZFIN;Acc:ZDB-GENE-050227-19]
ENSDARG00000005926	30	67	79	51	82	57	0	79	76	76	77	84	61	82	82	83	89	No.Diff.Exp	non-transmembrane	ak2	adenylate kinase 2 [Source:ZFIN;Acc:ZDB-GENE-030131-512]
ENSDARG00000005945	22	54	68	33	0	65	64	68	68	67	69	79	80	0	0	0	83	No.Diff.Exp	non-transmembrane	sart1	squamous cell carcinoma antigen recognised by T cells [Source:ZFIN;Acc:ZDB-GENE-040718-422]
ENSDARG00000005980	27	55	52	53	59	52	42	58	58	59	59	59	59	43	26	23	53	No.Diff.Exp	non-transmembrane	sfswap	splicing factor, suppressor of white-apricot family [Source:ZFIN;Acc:ZDB-GENE-040426-931]
ENSDARG00000006010	47	79	78	77	82	82	82	82	80	82	82	81	83	78	80	80	89	No.Diff.Exp	non-transmembrane	bmi1a	bmi1 polycomb ring finger oncogene 1a [Source:ZFIN;Acc:ZDB-GENE-030131-224]
ENSDARG00000006019	75	58	78	74	0	59	0	63.5	64.5	64.5	64.5	83	83	81	67	25	86	No.Diff.Exp	non-transmembrane	tktb	transketolase b [Source:ZFIN;Acc:ZDB-GENE-030909-13]
ENSDARG00000006031	61	73	71	64	70	63	64	70	70	70	70	81	83	51	78	75	69	No.Diff.Exp	non-transmembrane	abat	4-aminobutyrate aminotransferase [Source:ZFIN;Acc:ZDB-GENE-031006-4]
ENSDARG00000006052	29	47	0	0	46	0	0	0	0	0	0	57	56	57	52	52	67	No.Diff.Exp	non-transmembrane	malt1a	MALT1 paracaspase a [Source:ZFIN;Acc:ZDB-GENE-020801-2]
ENSDARG00000006074	54	61	79	76	80	72	75	82	83	80	80	81	84	80	0	0	90	No.Diff.Exp	non-transmembrane	uck2a	uridine-cytidine kinase 2a [Source:ZFIN;Acc:ZDB-GENE-030131-7158]
ENSDARG00000006092	47.5	75	74	77	77	75	62	74	75	75	75	81	0	80	81	81	90	No.Diff.Exp	non-transmembrane	rad21a	RAD21 cohesin complex component a [Source:ZFIN;Acc:ZDB-GENE-030131-994]
ENSDARG00000006124	0	62	59	54	0	61	57	59.5	52	49	59.5	74	74	70	70	72	75	No.Diff.Exp	non-transmembrane	kdm5c	lysine (K)-specific demethylase 5C [Source:ZFIN;Acc:ZDB-GENE-060810-94]
ENSDARG00000006192	33	43	44	0	47	34	35	45	46	46	47	54	53	44	53	52	9	No.Diff.Exp	non-transmembrane	gatad2ab	GATA zinc finger domain containing 2Ab [Source:ZFIN;Acc:ZDB-GENE-040426-2372]
ENSDARG00000006200	0	57	55	55	54	44	54	55	37	55	56	53.5	57	48.5	54	47.5	62	No.Diff.Exp	non-transmembrane	eif4g1a	eukaryotic translation initiation factor 4 gamma, 1a [Source:ZFIN;Acc:ZDB-GENE-070112-702]
ENSDARG00000006219	19	49	25	48	41	24	33	40	41	42	42	51	57	47	49	51	56	No.Diff.Exp	non-transmembrane	gnl3	guanine nucleotide binding protein-like 3 (nucleolar) [Source:ZFIN;Acc:ZDB-GENE-030131-616]
ENSDARG00000006225	83	94	90	94	0	93	79	93	93	79	91	92	93	92	69.5	0	93.5	dre_Tcell	non-transmembrane	ddx39aa	DEAD (Asp-Glu-Ala-Asp) box polypeptide 39Aa [Source:ZFIN;Acc:ZDB-GENE-030131-4275]
ENSDARG00000006242	67	78	65	80	81	71.5	71	77	77	77	77	76	73	79	81	81	83	No.Diff.Exp	transmembrane	ptp4a1	protein tyrosine phosphatase type IVA, member 1 [Source:ZFIN;Acc:ZDB-GENE-041121-11]
ENSDARG00000006260	0	97	95	96	0	83	0	97	97	97	97	0	0	0	0	0	0	dre_Myel	non-transmembrane	tuba8l4	tubulin, alpha 8 like 4 [Source:ZFIN;Acc:ZDB-GENE-040426-860]
ENSDARG00000006266	0	56	60	54	59	56	54	61	55	61	62	37.5	63	60	61	62	68	No.Diff.Exp	non-transmembrane	stat1a	signal transducer and activator of transcription 1, 91kDa [Source:ZFIN;Acc:ZDB-GENE-980526-499]
ENSDARG00000006290	0	71	56	47	58	58	63	61	62.6667	64	64	62	73	63	64	64	65	No.Diff.Exp	non-transmembrane	ndufs5	NADH dehydrogenase (ubiquinone) Fe-S protein 5 [Source:ZFIN;Acc:ZDB-GENE-050522-437]
ENSDARG00000006300	0	59	59	58	56	55	27	52	54	29	38	67	66	64	68	66	67	No.Diff.Exp	non-transmembrane	psmd9	proteasome (prosome, macropain) 26S subunit, non-ATPase, 9 [Source:ZFIN;Acc:ZDB-GENE-030131-431]
ENSDARG00000006308	21	37	18	37	0	34	0	32	33	34	34	46	44	0	43	35	44	No.Diff.Exp	non-transmembrane	ptpn18	protein tyrosine phosphatase, non-receptor type 18 [Source:ZFIN;Acc:ZDB-GENE-050320-12]
ENSDARG00000006316	75	68	95	96	96	0	51	76.75	85.8	76	94	98	96	96	96	0	96	No.Diff.Exp	non-transmembrane	rpl23a	ribosomal protein L23a [Source:ZFIN;Acc:ZDB-GENE-030131-7479]
ENSDARG00000006370	41	89	89	87	79	88	59	88	87	77	87	95	96	95	94	95	99	No.Diff.Exp	non-transmembrane	atp6v1h	ATPase, H+ transporting, lysosomal V1 subunit H [Source:ZFIN;Acc:ZDB-GENE-021219-2]
ENSDARG00000006389	0	96	88	96	95.5	95	52	95	94	95	95	91	96	97	94	94	98	No.Diff.Exp	non-transmembrane	smad2	SMAD family member 2 [Source:ZFIN;Acc:ZDB-GENE-990603-7]
ENSDARG00000006395	42	75	62	75	76	64	58	75	52.5	75	75	74	76	58	74	66	85	No.Diff.Exp	non-transmembrane	rbm25b	RNA binding motif protein 25b [Source:ZFIN;Acc:ZDB-GENE-030131-5547]
ENSDARG00000006397	45	72	62	77	79	74	53	73	73	74	74	89	88	88	89	87	89	No.Diff.Exp	transmembrane	laptm4a	lysosomal protein transmembrane 4 alpha [Source:ZFIN;Acc:ZDB-GENE-030131-1024]
ENSDARG00000006399	82	0	90	0	89	96	89	96	96	96	96	91	91	77	86	87	98	No.Diff.Exp	non-transmembrane	ywhae1	tyrosine 3-monooxygenase/tryptophan 5-monooxygenase activation protein, epsilon polypeptide 1 [Source:ZFIN;Acc:ZDB-GENE-030131-779]
ENSDARG00000006413	0	90.5	97	99	100	93	99	99	94.4	100	100	100	100	99	100	99	99	No.Diff.Exp	non-transmembrane	rpl38	ribosomal protein L38 [Source:ZFIN;Acc:ZDB-GENE-030131-8752]
ENSDARG00000006468	0	51	48	50	51	50	53	51	42	52	52	58	46.5	49	42	56	74	No.Diff.Exp	non-transmembrane	grap2a	GRB2-related adaptor protein 2a [Source:ZFIN;Acc:ZDB-GENE-050417-275]
ENSDARG00000006477	0	72	65	66	73	64	65	62	72	73	69	83	82	81	81	81	85	No.Diff.Exp	non-transmembrane	ddi2	DNA-damage inducible protein 2 [Source:ZFIN;Acc:ZDB-GENE-031030-15]
ENSDARG00000006487	31	71	69	80	77	78	46	75	72	58	60	82	80	73	74	73	66	No.Diff.Exp	non-transmembrane	anp32a	acidic (leucine-rich) nuclear phosphoprotein 32 family, member A [Source:ZFIN;Acc:ZDB-GENE-030131-7850]
ENSDARG00000006524	0	81	78	31.5	81	81	68	81	81	81	81	87	87	85	86	85	93	No.Diff.Exp	non-transmembrane	supt6h	suppressor of Ty 6 homolog [Source:ZFIN;Acc:ZDB-GENE-030131-7949]
ENSDARG00000006527	43.5	55	72	78	77	75	53	75	75	75	75	48.6667	59.5	51	56	51.5	86	No.Diff.Exp	non-transmembrane	brd3a	bromodomain containing 3a [Source:ZFIN;Acc:ZDB-GENE-030131-6141]
ENSDARG00000006603	70	77	79	82	82	82	83	83	84	83	83	83	84	85	0	0	0	No.Diff.Exp	non-transmembrane	csrp1a	cysteine and glycine-rich protein 1a [Source:ZFIN;Acc:ZDB-GENE-030909-4]
ENSDARG00000006609	21	69	0	74	86	51	51	85	84	83	86	91	91	86	89	66	95	No.Diff.Exp	non-transmembrane	map2k2a	mitogen-activated protein kinase kinase 2a [Source:ZFIN;Acc:ZDB-GENE-041027-1]
ENSDARG00000006624	0	93	90	92	91	91	70	91	91	91	91	91	73	0	92	92	98	No.Diff.Exp	non-transmembrane	ppp2r2ab	protein phosphatase 2, regulatory subunit B, alpha b [Source:ZFIN;Acc:ZDB-GENE-030131-5474]
ENSDARG00000006642	67	91	92	90	92	90	0	92	85	84	91	95	96	94	95	95	96	No.Diff.Exp	non-transmembrane	drg2	developmentally regulated GTP binding protein 2 [Source:ZFIN;Acc:ZDB-GENE-040808-29]
ENSDARG00000006672	0	69	76	70	75	73	74	73	73	73	73	77	61	66	69	68	83	No.Diff.Exp	non-transmembrane	znf395	zinc finger protein 395 [Source:ZFIN;Acc:ZDB-GENE-031002-50]
ENSDARG00000006683	22.5	68	64	64	67	62	55	63	63	58	63	78	78	74	70	74	83	dre_Myel	non-transmembrane	arhgef6	Rac/Cdc42 guanine nucleotide exchange factor (GEF) 6 [Source:ZFIN;Acc:ZDB-GENE-101013-2]
ENSDARG00000006691	52	87	86	87	89	88	44.5	85	86.2	89	89	88	92	94	95	94	95	No.Diff.Exp	non-transmembrane	rpl12	ribosomal protein L12 [Source:ZFIN;Acc:ZDB-GENE-030131-5297]
ENSDARG00000006747	0	0	0	0	0	0	0	0	0	0	0	42	93	90	84	83	44	No.Diff.Exp	transmembrane	tmem178b	transmembrane protein 178B [Source:ZFIN;Acc:ZDB-GENE-040718-92]
ENSDARG00000006758	0	25	32	33	34	32	31	32	32	29	33	42	44	45	48	46	53	No.Diff.Exp	transmembrane	FAM234B	family with sequence similarity 234, member B [Source:HGNC Symbol;Acc:HGNC:29288]
ENSDARG00000006766	72	0	78	14	0	80	0	83	83	84	84	88	89	46	88	88	82	No.Diff.Exp	non-transmembrane	snd1	staphylococcal nuclease and tudor domain containing 1 [Source:ZFIN;Acc:ZDB-GENE-030131-3124]
ENSDARG00000006921	22	77	76	76	71	74	66	74	74	75	75	81	78	0	71	72	8	No.Diff.Exp	transmembrane	lrp5	low density lipoprotein receptor-related protein 5 [Source:ZFIN;Acc:ZDB-GENE-050518-2]
ENSDARG00000007018	0	27	20	23.75	20	23	22	24.625	24.375	25.8	24.1667	0	0	0	25	0	26.5	No.Diff.Exp	transmembrane	ms4a17a.6	membrane-spanning 4-domains, subfamily A, member 17A.6 [Source:ZFIN;Acc:ZDB-GENE-070209-265]
ENSDARG00000007034	0	81	61	83	82.5	82	80	83.5	83.5	0	84	88	92	49	83	77	97	No.Diff.Exp	non-transmembrane	hnrpkl	heterogeneous nuclear ribonucleoprotein K, like [Source:ZFIN;Acc:ZDB-GENE-040426-1923]
ENSDARG00000007045	51	74	66	73	72	67	57	68	68	68	68	78	78	71	78	72	90	No.Diff.Exp	non-transmembrane	cnot4a	CCR4-NOT transcription complex, subunit 4a [Source:ZFIN;Acc:ZDB-GENE-090313-262]
ENSDARG00000007065	43	50	47	45	0	45	44	42	43	44	44	52	56	50	37	0	58	No.Diff.Exp	non-transmembrane	mrps18b	mitochondrial ribosomal protein S18B [Source:ZFIN;Acc:ZDB-GENE-050417-278]
ENSDARG00000007081	0	42	53	22	56	47	57	59	59	40	59	84	86	80	85	84	90	No.Diff.Exp	non-transmembrane	pias4a	protein inhibitor of activated STAT, 4a [Source:ZFIN;Acc:ZDB-GENE-040426-2734]
ENSDARG00000007098	41	66	54	54	62	49	49	58	57	57	57	67	66	63	58	43.5	79	No.Diff.Exp	transmembrane	itm2ba	integral membrane protein 2Ba [Source:ZFIN;Acc:ZDB-GENE-030131-2352]
ENSDARG00000007108	0	44	49	43	43	41.5	32	41	38	43.5	44	55	59	44	56	55	65	No.Diff.Exp	transmembrane	lipia	lipase, member Ia [Source:ZFIN;Acc:ZDB-GENE-040801-242]
ENSDARG00000007141	92	40	96	97	97	94	97	97	97	96	96	99	98	76.5	98	96	99	No.Diff.Exp	non-transmembrane	psmc3	proteasome (prosome, macropain) 26S subunit, ATPase, 3 [Source:ZFIN;Acc:ZDB-GENE-030131-666]
ENSDARG00000007169	62	79	73	81	81	77	51	77	77	79	79	90	89	85	89	90	92	No.Diff.Exp	non-transmembrane	itgb1bp1	integrin beta 1 binding protein 1 [Source:ZFIN;Acc:ZDB-GENE-051113-264]
ENSDARG00000007196	85	83	71	91	92	89	77	92	91	90	91	96	97	95	96	96	97	No.Diff.Exp	non-transmembrane	rae1	ribonucleic acid export 1 [Source:ZFIN;Acc:ZDB-GENE-040426-1029]
ENSDARG00000007216	85	87	90	90	90	87	53	90	90	90	90	32	94	56	91	90	47	No.Diff.Exp	non-transmembrane	abce1	ATP-binding cassette, sub-family E (OABP), member 1 [Source:ZFIN;Acc:ZDB-GENE-040426-1995]
ENSDARG00000007219	49.3333	92	91	92	17	89	75	92	92	91	92	93	95	90	92	54.5	95	No.Diff.Exp	non-transmembrane	actn1	actinin, alpha 1 [Source:ZFIN;Acc:ZDB-GENE-081113-4]
ENSDARG00000007241	0	68	61	63	62	61	33	40	39.5	61	60	74	70	65	73	72	69	No.Diff.Exp	non-transmembrane	mycb	v-myc avian myelocytomatosis viral oncogene homolog b [Source:ZFIN;Acc:ZDB-GENE-040426-780]
ENSDARG00000007257	74.6667	88	91	91	91	92	76	93	25	92	92	93	94	80	94	93	96	No.Diff.Exp	non-transmembrane	rab5ab	RAB5A, member RAS oncogene family, b [Source:ZFIN;Acc:ZDB-GENE-040122-3]
ENSDARG00000007264	64	78	70	0	74	74	65	71	72	74	74	78	77	78	79	76	80	No.Diff.Exp	non-transmembrane	gbas	glioblastoma amplified sequence [Source:ZFIN;Acc:ZDB-GENE-991008-18]
ENSDARG00000007285	35	63	0	49	0	53	49	54	0	55	55	0	65	64	64	0	64	No.Diff.Exp	non-transmembrane	mrpl57	mitochondrial ribosomal protein L57 [Source:ZFIN;Acc:ZDB-GENE-040426-1745]
ENSDARG00000007294	0	61	69	53.5	81	78	72	82	82	74	82	88	89	87	87	86	90	dre_NK	non-transmembrane	aco2	aconitase 2, mitochondrial [Source:ZFIN;Acc:ZDB-GENE-030131-1390]
ENSDARG00000007320	80	69	82	85	82	78	68.5	78	43.5	0	78	87	86	83	84	85	85	No.Diff.Exp	non-transmembrane	rpl7	ribosomal protein L7 [Source:ZFIN;Acc:ZDB-GENE-030131-8654]
ENSDARG00000007323	56	82	75	79	78	58	73	80	78	79	80	0	0	0	0	0	87	No.Diff.Exp	non-transmembrane	chmp4bb	charged multivesicular body protein 4Bb [Source:ZFIN;Acc:ZDB-GENE-040426-2812]
ENSDARG00000007347	0	79	77	73	77	55.5	46	67	64	74	74	86	88	79	79	0	89	No.Diff.Exp	transmembrane	degs1	delta(4)-desaturase, sphingolipid 1 [Source:ZFIN;Acc:ZDB-GENE-030131-5283]
ENSDARG00000007358	0	41	38	39	0	40	0	40	39	26	39	47	44	49	50	49	50	No.Diff.Exp	transmembrane	cxcr3.1	chemokine (C-X-C motif) receptor 3, tandem duplicate 1 [Source:ZFIN;Acc:ZDB-GENE-060130-38]
ENSDARG00000007362	65	0	79	75	75	78	0	74	75	76	75	89	88	74	87	81	85	No.Diff.Exp	transmembrane	sft2d1	SFT2 domain containing 1 [Source:ZFIN;Acc:ZDB-GENE-040426-1350]
ENSDARG00000007385	69	86	89	81	90	86	84	88	88	88	88	91	92	89	91	92	96	No.Diff.Exp	non-transmembrane	cct7	chaperonin containing TCP1, subunit 7 (eta) [Source:ZFIN;Acc:ZDB-GENE-020419-7]
ENSDARG00000007438	94.5	0	0	0	0	0	0	0	0	0	0	0	0	0	0	94	0	No.Diff.Exp	non-transmembrane	ube2ib	ubiquitin-conjugating enzyme E2Ib [Source:ZFIN;Acc:ZDB-GENE-990614-17]
ENSDARG00000007523	23	58	53	57	56	54	48	56	41	56	56	65	69	17	68	40	75	No.Diff.Exp	non-transmembrane	kmt2e	lysine (K)-specific methyltransferase 2E [Source:ZFIN;Acc:ZDB-GENE-030131-4120]
ENSDARG00000007526	0	86	85	50	26	82	76	81	81	80	80	88	92	89	90	89	36	No.Diff.Exp	non-transmembrane	ndufs2	NADH dehydrogenase (ubiquinone) Fe-S protein 2 [Source:ZFIN;Acc:ZDB-GENE-050522-273]
ENSDARG00000007601	47	24	58	66	66	47	63	65	65	63	66	67	70	67	68	63	77	No.Diff.Exp	non-transmembrane	zmynd8	zinc finger, MYND-type containing 8 [Source:ZFIN;Acc:ZDB-GENE-041119-1]
ENSDARG00000007603	0	71	66	67	0	68	50	68	67	67	68	76	78	80	77	23.5	83	No.Diff.Exp	non-transmembrane	stxbp2	syntaxin binding protein 2 [Source:ZFIN;Acc:ZDB-GENE-040426-2482]
ENSDARG00000007693	0	46	49	50	46	49	27	50	50	50	50	50	50	52	54	53	51	No.Diff.Exp	non-transmembrane	nfkbiab	nuclear factor of kappa light polypeptide gene enhancer in B-cells inhibitor, alpha b [Source:ZFIN;Acc:ZDB-GENE-030131-1819]
ENSDARG00000007697	0	85	82	82	81	0	0	76	77	84	83	69.5	86	89	86	87	0	No.Diff.Exp	non-transmembrane	fabp7a	fatty acid binding protein 7, brain, a [Source:ZFIN;Acc:ZDB-GENE-000627-1]
ENSDARG00000007708	0	94	93	94	93	91	52.5	95	71	95	95	98	97	94	96	96	97	No.Diff.Exp	non-transmembrane	nsa2	NSA2 ribosome biogenesis homolog (S. cerevisiae) [Source:ZFIN;Acc:ZDB-GENE-030131-488]
ENSDARG00000007720	0	45	74	73	63.3333	62	75	73	73	68	73	82	82	73	79	79	85	No.Diff.Exp	non-transmembrane	sub1b	SUB1 homolog b (S. cerevisiae) [Source:ZFIN;Acc:ZDB-GENE-040718-209]
ENSDARG00000007745	0	74	72	70	64	69	66	71	69	68	69	82	81	67	77	49	75	No.Diff.Exp	non-transmembrane	uqcrfs1	ubiquinol-cytochrome c reductase, Rieske iron-sulfur polypeptide 1 [Source:ZFIN;Acc:ZDB-GENE-040426-2060]
ENSDARG00000007755	63	69	66	64	67	44	54	65	65	66	66	74	75	73	73	51	74	No.Diff.Exp	transmembrane	wdr61	WD repeat domain 61 [Source:ZFIN;Acc:ZDB-GENE-040426-1851]
ENSDARG00000007760	46.5	90	85	86	78	76	52	87	86	87	87	93	89	84	87	84	95	No.Diff.Exp	non-transmembrane	spg21	spastic paraplegia 21 (autosomal recessive, Mast syndrome) [Source:ZFIN;Acc:ZDB-GENE-040426-2722]
ENSDARG00000007783	61	66	56	65	68	68	0	66	66	64	66	78	76	71	73	52	82	No.Diff.Exp	non-transmembrane	blk	BLK proto-oncogene, Src family tyrosine kinase [Source:ZFIN;Acc:ZDB-GENE-040724-106]
ENSDARG00000007786	0	74	67	70	69	67	64	70	71	70	44.5	85	87	84	85	85	86	No.Diff.Exp	transmembrane	tmx2b	thioredoxin-related transmembrane protein 2b [Source:ZFIN;Acc:ZDB-GENE-040625-105]
ENSDARG00000007791	87	94	86	89	0	88	75	88	88	88	88	96	97	97	96	56	98	No.Diff.Exp	non-transmembrane	ppp2r1a	protein phosphatase 2, regulatory subunit A, alpha [Source:ZFIN;Acc:ZDB-GENE-040426-2700]
ENSDARG00000007795	10	36	10	13	12	8	0	8	17.6667	9.25	8.83333	31	34.5	0	37	37	47	No.Diff.Exp	transmembrane	cst3	cystatin C (amyloid angiopathy and cerebral hemorrhage) [Source:ZFIN;Acc:ZDB-GENE-030131-373]
ENSDARG00000007808	46	54	54	52	55	50	51	50	50	50	51	70	70	69	68	65	74	No.Diff.Exp	transmembrane	zdhhc16a	zinc finger, DHHC-type containing 16a [Source:ZFIN;Acc:ZDB-GENE-040426-1621]
ENSDARG00000007863	57	78	73	77	76	77	78	77	77	77	77	0	80	76	0	0	86	No.Diff.Exp	non-transmembrane	tra2a	transformer 2 alpha homolog (Drosophila) [Source:ZFIN;Acc:ZDB-GENE-040426-1391]
ENSDARG00000007867	0	59	62	61	0	59	34	59	59	35	35	75	74	69	72	0	78	No.Diff.Exp	non-transmembrane	dazap2	DAZ associated protein 2 [Source:ZFIN;Acc:ZDB-GENE-030131-3036]
ENSDARG00000007886	66	73	70	72	71	69	61	64	69	0	69	77	80	73	76	75	85	No.Diff.Exp	transmembrane	slc35b2	solute carrier family 35 (adenosine 3'-phospho 5'-phosphosulfate transporter), member B2 [Source:ZFIN;Acc:ZDB-GENE-050213-1]
ENSDARG00000007901	73	79	78	79	78	69	74.5	78	78	77	77	82	83	80	80	79	83	No.Diff.Exp	non-transmembrane	crnkl1	crooked neck pre-mRNA splicing factor 1 [Source:ZFIN;Acc:ZDB-GENE-040426-694]
ENSDARG00000007923	36	64	62	52	62	64	0	64	65	64	64	70	70	66	72	70	60	No.Diff.Exp	non-transmembrane	ptpn1	protein tyrosine phosphatase, non-receptor type 1 [Source:ZFIN;Acc:ZDB-GENE-980605-23]
ENSDARG00000007960	0	69	69	58	51	61	66	70	70	66	71	0	0	0	0	0	84	No.Diff.Exp	non-transmembrane	hnrnpaba	heterogeneous nuclear ribonucleoprotein A/Ba [Source:ZFIN;Acc:ZDB-GENE-030131-185]
ENSDARG00000007975	57.75	82	77	61	77	77	0	54.5	55	62.5	66.6667	84	77	81	0	0	0	No.Diff.Exp	non-transmembrane	fth1b	ferritin, heavy polypeptide 1b [Source:ZFIN;Acc:ZDB-GENE-040912-30]
ENSDARG00000007989	0	85	85	0	0	71	85	84	84	0	84	88	0	85	83.5	87	89	No.Diff.Exp	non-transmembrane	nedd8	neural precursor cell expressed, developmentally down-regulated 8 [Source:ZFIN;Acc:ZDB-GENE-030616-588]
ENSDARG00000007996	28	74	53	75	75	65	62	75	75	73	75	73	78	72	75	77	90	No.Diff.Exp	non-transmembrane	pou2f1b	POU class 2 homeobox 1b [Source:ZFIN;Acc:ZDB-GENE-030131-2422]
ENSDARG00000008049	0	70	64	0	68	0	54	0	0	0	0	0	0	0	0	0	81	No.Diff.Exp	non-transmembrane	si:dkey-42i9.4	si:dkey-42i9.4 [Source:ZFIN;Acc:ZDB-GENE-030131-8398]
ENSDARG00000008097	0	68	63	65	0	60	46	64	64	64	64	87	86	57.5	69	81	93	No.Diff.Exp	non-transmembrane	srsf9	serine/arginine-rich splicing factor 9 [Source:ZFIN;Acc:ZDB-GENE-040426-2397]
ENSDARG00000008170	16	48	45	49	39	32	38	46	45	43	43	0	48	26	42	46	51	No.Diff.Exp	non-transmembrane	dbnla	drebrin-like a [Source:ZFIN;Acc:ZDB-GENE-040704-42]
ENSDARG00000008184	0	15	11	23	27	19	17	11	15	7	20	25	25	10	16	12	32	No.Diff.Exp	transmembrane	mia3	melanoma inhibitory activity family, member 3 [Source:ZFIN;Acc:ZDB-GENE-041014-270]
ENSDARG00000008186	0	67	66	68	73	64	0	71	71	61	71	46	75	58	72	71	49	dre_Myel	non-transmembrane	syk	spleen tyrosine kinase [Source:ZFIN;Acc:ZDB-GENE-040702-3]
ENSDARG00000008188	55	61	67	72	0	59	61	75	75	75	68	87	88	65	0	58	77	No.Diff.Exp	non-transmembrane	sf1	splicing factor 1 [Source:ZFIN;Acc:ZDB-GENE-030131-2492]
ENSDARG00000008200	58	83	82	83	84	83	77	84	84	83	84	87	89	77	88	88	90	No.Diff.Exp	non-transmembrane	ugp2b	UDP-glucose pyrophosphorylase 2b [Source:ZFIN;Acc:ZDB-GENE-030131-6352]
ENSDARG00000008218	0	47	50	56	54	49	0	56	56	56	56	66	61	55	60	59	73	No.Diff.Exp	non-transmembrane	znf410	zinc finger protein 410 [Source:ZFIN;Acc:ZDB-GENE-040426-1817]
ENSDARG00000008243	0	77	82	82	83	82	66	82	82	31	83	87	86	88	86	85	94	No.Diff.Exp	non-transmembrane	cct8	chaperonin containing TCP1, subunit 8 (theta) [Source:ZFIN;Acc:ZDB-GENE-040426-876]
ENSDARG00000008255	70	0	0	86	87	87	66	86	85	86	86	89	69	85	87	88	94	No.Diff.Exp	non-transmembrane	cnot6a	CCR4-NOT transcription complex, subunit 6a [Source:ZFIN;Acc:ZDB-GENE-030131-2768]
ENSDARG00000008292	0	97	96	96	97	96	0	96	96	96	95.5	98	99	98	97	97	99	No.Diff.Exp	non-transmembrane	eif2s3	eukaryotic translation initiation factor 2, subunit 3 gamma [Source:ZFIN;Acc:ZDB-GENE-030131-5552]
ENSDARG00000008310	35.5	43	56	57	57	57	57	57	57	51	57	63	69	40	59	51	77	dre_Tcell	non-transmembrane	ip6k2a	inositol hexakisphosphate kinase 2a [Source:ZFIN;Acc:ZDB-GENE-030131-760]
ENSDARG00000008329	0	0	69	0	69	55	60	68	68	68	68	54	78	75	73	76	37.5	No.Diff.Exp	transmembrane	asic1a	acid-sensing (proton-gated) ion channel 1a [Source:ZFIN;Acc:ZDB-GENE-040513-2]
ENSDARG00000008363	0	26	27	27	26	29	28	30	0	30	30	38	33.5	38	34	37	41	No.Diff.Exp	non-transmembrane	mcl1b	myeloid cell leukemia 1b [Source:ZFIN;Acc:ZDB-GENE-030825-1]
ENSDARG00000008370	74	79	92	90	90	92	83	92	91	92	92	92	89	83	73	92	91	No.Diff.Exp	non-transmembrane	csnk1da	casein kinase 1, delta a [Source:ZFIN;Acc:ZDB-GENE-030131-825]
ENSDARG00000008380	38	51	49	46	52	46	32	53	53	53	53	57	61	51	56	13	67	No.Diff.Exp	non-transmembrane	brd7	bromodomain containing 7 [Source:ZFIN;Acc:ZDB-GENE-040426-2687]
ENSDARG00000008383	78	89	84	92	93	85	82	90	78	91	91	91	91	89	91	91	99	No.Diff.Exp	non-transmembrane	arpc1a	actin related protein 2/3 complex, subunit 1A [Source:ZFIN;Acc:ZDB-GENE-040116-1]
ENSDARG00000008396	26	0	0	18.5	25	20	25	26	26	25	25	40	42	0	0	0	50	No.Diff.Exp	non-transmembrane	ftr24	finTRIM family, member 24 [Source:ZFIN;Acc:ZDB-GENE-050731-2]
ENSDARG00000008480	59	66	66	66	64	62	65	63	64	63	63	72	71	62	72	73	77	No.Diff.Exp	non-transmembrane	trmt61a	tRNA methyltransferase 61A [Source:ZFIN;Acc:ZDB-GENE-040718-5]
ENSDARG00000008502	68	70	71	71	68	65	58	67	67	66	66	77	75	73	77	75	75	No.Diff.Exp	non-transmembrane	pno1	partner of NOB1 homolog [Source:ZFIN;Acc:ZDB-GENE-040426-1419]
ENSDARG00000008503	0	9	42	49	46	43	32	49	43	50	50	28	0	27	53	51	66	No.Diff.Exp	non-transmembrane	glcci1	glucocorticoid induced 1 [Source:ZFIN;Acc:ZDB-GENE-031010-41]
ENSDARG00000008551	0	74	0	0	67	71	56	71	62.3333	72	72	77	79	72	80	73	84	No.Diff.Exp	non-transmembrane	pole3	polymerase (DNA directed), epsilon 3 (p17 subunit) [Source:ZFIN;Acc:ZDB-GENE-040426-1773]
ENSDARG00000008575	41	64	59	64	64	58	39	62	35	63	63	77	79	71	75	76	82	No.Diff.Exp	non-transmembrane	lyst	lysosomal trafficking regulator [Source:ZFIN;Acc:ZDB-GENE-070702-1]
ENSDARG00000008592	28	48	47	61	62	47	45	0	0	57	57	0	0	0	0	0	77	No.Diff.Exp	non-transmembrane	mtmr8	myotubularin related protein 8 [Source:ZFIN;Acc:ZDB-GENE-040426-1016]
ENSDARG00000008678	47	50	76	78	79	79	39	79	0	79	79	84	85	84	80	79	83	No.Diff.Exp	non-transmembrane	snx3	sorting nexin 3 [Source:ZFIN;Acc:ZDB-GENE-030131-921]
ENSDARG00000008697	0	57	56	57	56	54	52	57	57	58	58	0	0	0	0	7	52	No.Diff.Exp	non-transmembrane	epas1a	endothelial PAS domain protein 1a [Source:ZFIN;Acc:ZDB-GENE-030131-4490]
ENSDARG00000008706	50	56	63	57	56	48	47	64	63	60	60	79	79	73	66	77	92	No.Diff.Exp	non-transmembrane	paip2b	poly(A) binding protein interacting protein 2B [Source:ZFIN;Acc:ZDB-GENE-040426-1736]
ENSDARG00000008723	0	69	79	0	74	75	50	79	78	78	79	81	79	81	81	81	58	No.Diff.Exp	non-transmembrane	prkcba	protein kinase C, beta a [Source:ZFIN;Acc:ZDB-GENE-040426-1354]
ENSDARG00000008735	0	63	54	60	61	61	27	61	61	61	62	71	69	69	46	69	77	No.Diff.Exp	transmembrane	atp6ap2	ATPase, H+ transporting, lysosomal accessory protein 2 [Source:ZFIN;Acc:ZDB-GENE-040426-1960]
ENSDARG00000008748	0	87	92	97	90	94	82	97	96	92.5	75	96	95	89	82	85	100	No.Diff.Exp	non-transmembrane	ube2na	ubiquitin-conjugating enzyme E2Na [Source:ZFIN;Acc:ZDB-GENE-040426-2873]
ENSDARG00000008811	0	32	52	46	57	43	54	49	49	45	51	70	75	68	71	71	68	No.Diff.Exp	transmembrane	cmtm3	CKLF-like MARVEL transmembrane domain containing 3 [Source:ZFIN;Acc:ZDB-GENE-040801-206]
ENSDARG00000008818	23	55	52	49	19	48	45	52	53	0	53	50	49	42	47	50	34	No.Diff.Exp	non-transmembrane	hsf1	heat shock transcription factor 1 [Source:ZFIN;Acc:ZDB-GENE-000616-16]
ENSDARG00000008859	13	72	69	71	72	57	46	70	70	71	71	84	86	67	80	81	91	No.Diff.Exp	non-transmembrane	mylipa	myosin regulatory light chain interacting protein a [Source:ZFIN;Acc:ZDB-GENE-030131-7831]
ENSDARG00000008867	0	96	89	96	96	96	0	96	96	96	95.5	93	92	0	91	94	91	dre_Myel	non-transmembrane	rap1b	RAP1B, member of RAS oncogene family [Source:ZFIN;Acc:ZDB-GENE-030131-9662]
ENSDARG00000008884	0	77	73	92	89	77	0	89	89	86	90	96	96	0	95	91	69	dre_Tcell	non-transmembrane	hprt1	hypoxanthine phosphoribosyltransferase 1 [Source:ZFIN;Acc:ZDB-GENE-040426-1918]
ENSDARG00000008904	52.5	37.5	79	80	78	79	75	81	80	0	81	83	84	80	82	11	79	No.Diff.Exp	non-transmembrane	smarca2	SWI/SNF related, matrix associated, actin dependent regulator of chromatin, subfamily a, member 2 [Source:ZFIN;Acc:ZDB-GENE-030131-5964]
ENSDARG00000008920	0	65	48	0	53	49	43	48	49	50.5	51	61	68	63	57	0	67	No.Diff.Exp	non-transmembrane	mrpl53	mitochondrial ribosomal protein L53 [Source:ZFIN;Acc:ZDB-GENE-040912-93]
ENSDARG00000008936	88	98	97	94	97	94	55	96	96	97	80	97	98	97	97	90	98	No.Diff.Exp	transmembrane	sec11a	SEC11 homolog A, signal peptidase complex subunit [Source:ZFIN;Acc:ZDB-GENE-040718-227]
ENSDARG00000008947	57	64	77	79	80	80	72	80	52	81	81	83	87	76	75	82	76	No.Diff.Exp	non-transmembrane	rtf1	RTF1 homolog, Paf1/RNA polymerase II complex component [Source:ZFIN;Acc:ZDB-GENE-030131-6778]
ENSDARG00000008966	0	0	0	0	0	0	0	0	0	0	0	76	93	91	93	65.3333	95	No.Diff.Exp	non-transmembrane	tbl1xr1b	transducin (beta)-like 1 X-linked receptor 1b [Source:ZFIN;Acc:ZDB-GENE-040426-1192]
ENSDARG00000009020	45	69	69	70	71	71	70	71	71	70	70	81	84	78	84	83	85	No.Diff.Exp	transmembrane	cnr1	cannabinoid receptor 1 [Source:ZFIN;Acc:ZDB-GENE-040312-3]
ENSDARG00000009021	0	61	78.5	78	62	61	42	77	77	76	77	89	85	81	86	85	88	No.Diff.Exp	transmembrane	chrna1	cholinergic receptor, nicotinic, alpha 1 (muscle) [Source:ZFIN;Acc:ZDB-GENE-980526-137]
ENSDARG00000009031	0	80	76	85	79	80	65	86	86	86	86	49.6667	78	71.5	74	77	92	No.Diff.Exp	non-transmembrane	tnikb	TRAF2 and NCK interacting kinase b [Source:ZFIN;Acc:ZDB-GENE-051113-320]
ENSDARG00000009087	0	29	26	25	28	32	28	31	31	15	29	35	34	0	32	30	43	dre_Myel	transmembrane	cd74a	CD74 molecule, major histocompatibility complex, class II invariant chain a [Source:ZFIN;Acc:ZDB-GENE-000901-1]
ENSDARG00000009106	0	81	85	81	86	48	61	77	77	78	78	89	91	86	85	30	95	dre_Tcell	transmembrane	serinc1	serine incorporator 1 [Source:ZFIN;Acc:ZDB-GENE-030131-4415]
ENSDARG00000009208	44	78	77	78	77	68	67	76	75	55	76	84	85	80	83	82	91	No.Diff.Exp	non-transmembrane	prkcda	protein kinase C, delta a [Source:ZFIN;Acc:ZDB-GENE-030131-6503]
ENSDARG00000009212	0	66	74	0	0	0	0	0	0	0	0	79.5	81	73	0	77	89	No.Diff.Exp	non-transmembrane	ppiaa	peptidylprolyl isomerase Aa (cyclophilin A) [Source:ZFIN;Acc:ZDB-GENE-030131-8556]
ENSDARG00000009214	61	66	72	74	72	56	57	68	67	54	69	57.5	81	78	79	79	83	No.Diff.Exp	transmembrane	tmem180	transmembrane protein 180 [Source:ZFIN;Acc:ZDB-GENE-041212-83]
ENSDARG00000009262	72	66	0	69	70	62	53	58	61	60	61	89	89	74	87	86	91	No.Diff.Exp	transmembrane	FAR2	fatty acyl CoA reductase 2 [Source:HGNC Symbol;Acc:HGNC:25531]
ENSDARG00000009285	92	96	97	95	95	95	96	95.5	91.6667	96	96	96	97	98	96	97	98	No.Diff.Exp	non-transmembrane	rpl15	ribosomal protein L15 [Source:ZFIN;Acc:ZDB-GENE-040801-183]
ENSDARG00000009313	0	60	58	0	0	0	38	46	46	46	47	72	70	65	51	53	39	No.Diff.Exp	transmembrane
ENSDARG00000009336	51	76	64	68	68	74	66	77	77	74	76	85	84	64	57	84	84	dre_Myel	non-transmembrane	aif1l	allograft inflammatory factor 1-like [Source:ZFIN;Acc:ZDB-GENE-030131-9646]
ENSDARG00000009418	20	71	71	70	61	73	41	74	60	74	72	80	80	77	78	79	82	No.Diff.Exp	non-transmembrane	mef2cb	myocyte enhancer factor 2cb [Source:ZFIN;Acc:ZDB-GENE-040901-7]
ENSDARG00000009436	48	64	66	71	68	70	54	72	58.5	0	72	80	80	76	78	68	0	No.Diff.Exp	non-transmembrane	ubxn7	UBX domain protein 7 [Source:ZFIN;Acc:ZDB-GENE-040704-8]
ENSDARG00000009447	0	81	81	71	79	79	62	79	79	79	79	85	83	0	0	83	94	No.Diff.Exp	transmembrane	atp5g3b	ATP synthase, H+ transporting, mitochondrial F0 complex, subunit c3 (subunit 9) b [Source:ZFIN;Acc:ZDB-GENE-020814-1]
ENSDARG00000009480	0	56	55	55	57	40	34	57	57	58	58	65	66	68	66	0	70	No.Diff.Exp	non-transmembrane	pdcl	phosducin-like [Source:ZFIN;Acc:ZDB-GENE-030131-2365]
ENSDARG00000009505	0	78	0	70	71	80	39	80	74	82	82	90	83	87	89	90	92	No.Diff.Exp	non-transmembrane	slmo2	slowmo homolog 2 (Drosophila) [Source:ZFIN;Acc:ZDB-GENE-031002-13]
ENSDARG00000009525	46	83	83	83	86	78	71	85	85	86	86	79	84	83	78	63	91	No.Diff.Exp	non-transmembrane	tial1	TIA1 cytotoxic granule-associated RNA binding protein-like 1 [Source:ZFIN;Acc:ZDB-GENE-040426-1547]
ENSDARG00000009549	0	85	26	5.75	86	83	80	86	86	86	86	92	92	90	91	91	31	No.Diff.Exp	non-transmembrane	ubr4	ubiquitin protein ligase E3 component n-recognin 4 [Source:ZFIN;Acc:ZDB-GENE-090313-341]
ENSDARG00000009585	44.5	66	67	38	70	59	35	65.5	69	71	66	0	30	48	0	0	75	No.Diff.Exp	transmembrane	papola	poly(A) polymerase alpha [Source:ZFIN;Acc:ZDB-GENE-030131-3507]
ENSDARG00000009594	0	60	56	57	54	55	44	58	58	59	59	67	70	54	68	66	62	No.Diff.Exp	non-transmembrane	nr1d2b	nuclear receptor subfamily 1, group D, member 2b [Source:ZFIN;Acc:ZDB-GENE-990415-244]
ENSDARG00000009640	0	77	74	78	82	81	0	83	83	81	81	90	91	89	89	84	86	No.Diff.Exp	non-transmembrane	psmb1	proteasome (prosome, macropain) subunit, beta type, 1 [Source:ZFIN;Acc:ZDB-GENE-040618-2]
ENSDARG00000009657	26	76	69	73	75	77	71	76	76	76	76	87	87	69	85	84	87	No.Diff.Exp	non-transmembrane	fgfr1op2	FGFR1 oncogene partner 2 [Source:ZFIN;Acc:ZDB-GENE-030131-7451]
ENSDARG00000009724	21	65	65	68	67	57	56	64	65	66	66	77	77	75	0	76	82	No.Diff.Exp	transmembrane	rpn2	ribophorin II [Source:ZFIN;Acc:ZDB-GENE-030131-7928]
ENSDARG00000009735	0	36	30	60	60	57	55	61	12	61	61	65.5	70	39	67	66	64	No.Diff.Exp	non-transmembrane	gigfy2	GRB10 interacting GYF protein 2 [Source:ZFIN;Acc:ZDB-GENE-050706-185]
ENSDARG00000009745	70	82	78	52	73	80	76	79	79	80	80	89	88	86	87	77	91	No.Diff.Exp	non-transmembrane	fbxw2	F-box and WD repeat domain containing 2 [Source:ZFIN;Acc:ZDB-GENE-050522-303]
ENSDARG00000009753	83	100	99	100	100	92	0	100	85	100	100	98	98	98	98	98	100	No.Diff.Exp	non-transmembrane	sf3b6	splicing factor 3b, subunit 6 [Source:ZFIN;Acc:ZDB-GENE-040625-36]
ENSDARG00000009754	0	39	24	20	34	35	34	36	36	37	37	0	36	33	35	32	47	No.Diff.Exp	non-transmembrane	zc3h11a	zinc finger CCCH-type containing 11A [Source:ZFIN;Acc:ZDB-GENE-030131-3272]
ENSDARG00000009771	64	56	74	42	76	65	64	75	75	75	75	70	82	69	79	83	88	No.Diff.Exp	non-transmembrane	ppme1	protein phosphatase methylesterase 1 [Source:ZFIN;Acc:ZDB-GENE-030131-7064]
ENSDARG00000009779	0	30	31	29	31	34	34	33	0	35	35	41	35.5	38	35	38	0	No.Diff.Exp	transmembrane	mcl1a	myeloid cell leukemia 1a [Source:ZFIN;Acc:ZDB-GENE-000511-7]
ENSDARG00000009782	16	77	76	0	74	74	72	79	80	79	81	88	89	83	88	32	90	dre_Myel	non-transmembrane	myh11a	myosin, heavy chain 11a, smooth muscle [Source:ZFIN;Acc:ZDB-GENE-050531-1]
ENSDARG00000009830	33	83	78	80	82	60	65	45	39	79	79	88	89	86	87	85	92	No.Diff.Exp	non-transmembrane	hdlbpa	high density lipoprotein binding protein a [Source:ZFIN;Acc:ZDB-GENE-030131-2032]
ENSDARG00000009871	69	86	84	84	86	84	75	85	85	84	86	87	86	85	0	84	96	No.Diff.Exp	non-transmembrane	snrpc	small nuclear ribonucleoprotein polypeptide C [Source:ZFIN;Acc:ZDB-GENE-020419-26]
ENSDARG00000009881	0	41	31	0	16	0	0	38	20	39	39	0	0	30	0	0	46	No.Diff.Exp	non-transmembrane	ier5	immediate early response 5 [Source:ZFIN;Acc:ZDB-GENE-030616-127]
ENSDARG00000009901	43	29	66	65	0	0	56	58	58	58	58	69	69	67	67	66	73	No.Diff.Exp	transmembrane	slc38a5a	solute carrier family 38, member 5a [Source:ZFIN;Acc:ZDB-GENE-081105-92]
ENSDARG00000009950	0	83	84	77	86	76	60.3333	75	75	68	76	84	86	75	82	84	88	No.Diff.Exp	non-transmembrane	edf1	endothelial differentiation-related factor 1 [Source:ZFIN;Acc:ZDB-GENE-040426-1710]
ENSDARG00000009958	0	70	67	66	66	69	43	70	69	70	70	67.5	68.5	59.5	69.5	67	58	No.Diff.Exp	non-transmembrane	cbl	Cbl proto-oncogene, E3 ubiquitin protein ligase [Source:ZFIN;Acc:ZDB-GENE-041114-207]
ENSDARG00000009982	52	86	85	74	84	83	80	83	66	83	83	87	87	81	86	86	94	No.Diff.Exp	non-transmembrane	fam199x	family with sequence similarity 199, X-linked [Source:ZFIN;Acc:ZDB-GENE-040808-24]
ENSDARG00000010032	43	50	43	0	45	43	34	44	44	51	51	50	58	69	0	54	65	dre_Tcell	transmembrane	cmtm7	CKLF-like MARVEL transmembrane domain containing 7 [Source:ZFIN;Acc:ZDB-GENE-041111-174]
ENSDARG00000010051	0	85	88	85	86	86	0	86	86	80	86	88	89	89	89	89	92	No.Diff.Exp	non-transmembrane	ufd1l	ubiquitin fusion degradation 1 like (yeast) [Source:ZFIN;Acc:ZDB-GENE-040718-150]
ENSDARG00000010059	0	36	35	44	44	54	39	52	54	53	55	48	43	22	42	42	49	No.Diff.Exp	non-transmembrane	itpkb	inositol-trisphosphate 3-kinase B [Source:ZFIN;Acc:ZDB-GENE-041014-166]
ENSDARG00000010113	0	65	0	62	65	65	39	40.5	64	64	58.5	65	66	60	60	29	66	No.Diff.Exp	transmembrane	ndufb8	NADH dehydrogenase (ubiquinone) 1 beta subcomplex, 8 [Source:ZFIN;Acc:ZDB-GENE-040426-1858]
ENSDARG00000010149	62	92	75.5	89	88.5	87	88	91	83.5	90	90	95	95.5	93	97	96.5	96	No.Diff.Exp	non-transmembrane	atp5a1	ATP synthase, H+ transporting, mitochondrial F1 complex, alpha subunit 1, cardiac muscle [Source:ZFIN;Acc:ZDB-GENE-060201-1]
ENSDARG00000010155	0	63	74	72	30	76	41	79	79	79	80	81	84	39	81	39.6667	0	No.Diff.Exp	non-transmembrane	abi1a	abl-interactor 1a [Source:ZFIN;Acc:ZDB-GENE-040426-1701]
ENSDARG00000010160	97	70	82	94	98	28	99	99	95.5	98.5	99	98	98	84	98	98	98	No.Diff.Exp	non-transmembrane	rps15a	ribosomal protein S15a [Source:ZFIN;Acc:ZDB-GENE-030131-8708]
ENSDARG00000010169	32	63	60	55	56	60	56	62	61	62	62	69	69	66	67	68	69	dre_NK	non-transmembrane	myd88	myeloid differentiation primary response 88 [Source:ZFIN;Acc:ZDB-GENE-040219-3]
ENSDARG00000010194	35.5	56	52	54	16	15.6667	12.5	55	55	0	56	64	52	55	0	60	0	No.Diff.Exp	non-transmembrane	eif4bb	eukaryotic translation initiation factor 4Bb [Source:ZFIN;Acc:ZDB-GENE-030131-8563]
ENSDARG00000010244	0	0	74	77	80	74	75	75	73.3333	75	76	83	85	76	84	84	85	No.Diff.Exp	non-transmembrane	rpl22l1	ribosomal protein L22-like 1 [Source:ZFIN;Acc:ZDB-GENE-060804-3]
ENSDARG00000010246	0	78	90	89	0	89	0	89	89	0	90	93	93	95	93	51	98	No.Diff.Exp	non-transmembrane	prmt1	protein arginine methyltransferase 1 [Source:ZFIN;Acc:ZDB-GENE-030131-693]
ENSDARG00000010252	2	54	48	0	49	48	37	49	49	50	50	63	66	61	63	61	0	No.Diff.Exp	non-transmembrane	jak3	Janus kinase 3 (a protein tyrosine kinase, leukocyte) [Source:ZFIN;Acc:ZDB-GENE-070725-4]
ENSDARG00000010255	0	43	0	31	11	35	23	36	38	40	40	51	48	44	48	45	61	No.Diff.Exp	non-transmembrane	bin2b	bridging integrator 2b [Source:ZFIN;Acc:ZDB-GENE-030131-5598]
ENSDARG00000010279	0	51	64	58	64	64	44	63	62	64	64	72	71	70	70	55	81	No.Diff.Exp	transmembrane	scamp2	secretory carrier membrane protein 2 [Source:ZFIN;Acc:ZDB-GENE-040426-2702]
ENSDARG00000010301	0	74	78	69	77	63	55	78	72	80	80	0	87	60	82.5	83.5	90	No.Diff.Exp	transmembrane	b4galt6	UDP-Gal:betaGlcNAc beta 1,4- galactosyltransferase, polypeptide 6 [Source:ZFIN;Acc:ZDB-GENE-040426-789]
ENSDARG00000010317	0	51	52	52	52	51	0	51	52	52	52	64	66	60	64	63	77	No.Diff.Exp	transmembrane	gpr183a	G protein-coupled receptor 183a [Source:ZFIN;Acc:ZDB-GENE-070615-28]
ENSDARG00000010384	30	41.6667	32	33	33	0	0	33	33	33	33	0	0	0	0	0	54	No.Diff.Exp	transmembrane	lpar5a	lysophosphatidic acid receptor 5a [Source:ZFIN;Acc:ZDB-GENE-030131-1193]
ENSDARG00000010411	0	24.5	51	54	0	42	41	54	53	52	52	77	70	55	73	67	84	No.Diff.Exp	non-transmembrane	epn1	epsin 1 [Source:ZFIN;Acc:ZDB-GENE-040426-2680]
ENSDARG00000010481	69.5	87	86	87	86	73	25.3333	86	86	86	86	90.5	94	87	90.5	90.5	98	dre_Tcell	non-transmembrane	bzw1a	basic leucine zipper and W2 domains 1a [Source:ZFIN;Acc:ZDB-GENE-030131-3951]
ENSDARG00000010516	73	85	87	86	85	59	43	81	77.8286	85	85	93	91	89	91	91	94	No.Diff.Exp	non-transmembrane	rpl21	ribosomal protein L21 [Source:ZFIN;Acc:ZDB-GENE-030131-8512]
ENSDARG00000010519	0	46	39	0	39	33	31	34	35	36	36	54	56	0	52	55	54	No.Diff.Exp	non-transmembrane	per3	period circadian clock 3 [Source:ZFIN;Acc:ZDB-GENE-000804-1]
ENSDARG00000010553	43	78	77	75	77	59	0	66	76	78	78	87	88	0	88	88	92	No.Diff.Exp	transmembrane	mmgt1	membrane magnesium transporter 1 [Source:ZFIN;Acc:ZDB-GENE-040801-65]
ENSDARG00000010556	0	31	44	44	0	43	42	44	0	44	44	53	58	53	57	57	61	dre_Tcell	transmembrane
ENSDARG00000010571	74	83	75	83	85	81	80	84	84	85	85	90	90	81	90	24.2	94	No.Diff.Exp	non-transmembrane	ezh2	enhancer of zeste 2 polycomb repressive complex 2 subunit [Source:ZFIN;Acc:ZDB-GENE-041111-259]
ENSDARG00000010596	0	47	40	42	43	44	43	44	45	45	45	63	64	60	57	59	0	No.Diff.Exp	transmembrane	slc7a6os	solute carrier family 7, member 6 opposite strand [Source:ZFIN;Acc:ZDB-GENE-041114-32]
ENSDARG00000010619	19	35	32	34	36	34	35	36	35	35	35	0	0	0	0	0	47	No.Diff.Exp	non-transmembrane	themis	thymocyte selection associated [Source:ZFIN;Acc:ZDB-GENE-041008-160]
ENSDARG00000010641	58	66	68	0	62	68	55	67	67	69	69	78	74	74	59	79	83	No.Diff.Exp	transmembrane	slc20a1b	solute carrier family 20 (phosphate transporter), member 1b [Source:ZFIN;Acc:ZDB-GENE-030131-260]
ENSDARG00000010654	0	68	66	67	67	61	57	67	67	67	67	73	74	58	60	64	77	No.Diff.Exp	non-transmembrane	ARHGAP42 (1 of 2)	Rho GTPase activating protein 42 [Source:HGNC Symbol;Acc:HGNC:26545]
ENSDARG00000010710	0	80	82	84	73	68	61	83	77	79	84	91	91	89	91	87	93	No.Diff.Exp	non-transmembrane	msi1	musashi RNA-binding protein 1 [Source:ZFIN;Acc:ZDB-GENE-050320-86]
ENSDARG00000010721	0	91	87	79	90	75	71	88	88	74	89	93	95	95	93	92	96	No.Diff.Exp	non-transmembrane	2006-09-01	septin 6 [Source:ZFIN;Acc:ZDB-GENE-030131-1414]
ENSDARG00000010728	0	62	67.5	71	69	65	59	70	70	69	70	0	74	51	69	0	79	No.Diff.Exp	non-transmembrane	scin	scinderin [Source:ZFIN;Acc:ZDB-GENE-060503-6]
ENSDARG00000010745	56	73	84	83	78	73	0	84	84	84	84	84	86	83	84	83	92	No.Diff.Exp	non-transmembrane	dnaja2l	DnaJ (Hsp40) homolog, subfamily A, member 2, like [Source:ZFIN;Acc:ZDB-GENE-030131-2884]
ENSDARG00000010779	0	0	0	0	0	0	0	0	0	0	0	89	91	88	90	80	33	No.Diff.Exp	non-transmembrane	tlk2	tousled-like kinase 2 [Source:ZFIN;Acc:ZDB-GENE-060623-36]
ENSDARG00000010784	39	64	55	67	66	64	53	64	67	67	68	75	75	58	81	71	78	No.Diff.Exp	transmembrane	ppp1r12a	protein phosphatase 1, regulatory subunit 12A [Source:ZFIN;Acc:ZDB-GENE-041011-3]
ENSDARG00000010792	0	48	45.5	26.3333	42	41	27	43.5	42.5	45	45	59	61	48	59	56	68	No.Diff.Exp	non-transmembrane	cdc25b	cell division cycle 25B [Source:ZFIN;Acc:ZDB-GENE-000330-5]
ENSDARG00000010831	0	74	54	73	45	45	0	69	71	69	69	82	81	84	67	79	0	No.Diff.Exp	non-transmembrane	churc1	churchill domain containing 1 [Source:ZFIN;Acc:ZDB-GENE-041001-150]
ENSDARG00000010873	0	74	70	67	73	70	64	73	73	73	73	56	82	18	78	43	88	No.Diff.Exp	non-transmembrane	DDX17	DEAD (Asp-Glu-Ala-Asp) box helicase 17 [Source:HGNC Symbol;Acc:HGNC:2740]
ENSDARG00000010965	0	96	84	88	76	72	80	86	87	88	88	99	98	98	98	98	99	No.Diff.Exp	non-transmembrane	psma8	proteasome (prosome, macropain) subunit, alpha type, 8 [Source:ZFIN;Acc:ZDB-GENE-040426-2194]
ENSDARG00000010981	45	63	67	60	69	46	63	69	69	69	69	81	0	78	0	0	87	No.Diff.Exp	transmembrane	zdhhc3a	zinc finger, DHHC-type containing 3a [Source:ZFIN;Acc:ZDB-GENE-040718-484]
ENSDARG00000011020	40	57	57	58	45	59	37	60	41.6667	59.25	59.5	59	57	65	56	57	85	No.Diff.Exp	non-transmembrane	hnrnpa1a	heterogeneous nuclear ribonucleoprotein A1a [Source:ZFIN;Acc:ZDB-GENE-040426-1546]
ENSDARG00000011055	48	68	68	68	70	70	30	69	70	70	69	71	72	65	66	66	79	No.Diff.Exp	non-transmembrane	fbxo9	F-box protein 9 [Source:ZFIN;Acc:ZDB-GENE-030131-4194]
ENSDARG00000011079	18	67	70	66	70	63	53	70	69	72	72	81	82	51	79	76	77	No.Diff.Exp	non-transmembrane	wdr3	WD repeat domain 3 [Source:ZFIN;Acc:ZDB-GENE-030131-9830]
ENSDARG00000011122	65	93	93	95	92	94	60	94	94	94	94	80	97	0	96	95	98	No.Diff.Exp	non-transmembrane	pptc7a	PTC7 protein phosphatase homolog a [Source:ZFIN;Acc:ZDB-GENE-041114-74]
ENSDARG00000011125	35	95	94	92	95	90	90	91	91	93	93	90	98	80	93	97	0	No.Diff.Exp	non-transmembrane	snrpb	small nuclear ribonucleoprotein polypeptides B and B1 [Source:ZFIN;Acc:ZDB-GENE-040426-1819]
ENSDARG00000011146	65	67	0	67	0	72	0	74	76	59	59	73	74	70	75	72	73	No.Diff.Exp	non-transmembrane	uqcrb	ubiquinol-cytochrome c reductase binding protein [Source:ZFIN;Acc:ZDB-GENE-050522-542]
ENSDARG00000011201	67	0	67	75	73	75	72	75	71.2	75	75	78	77	62	0	0	83	No.Diff.Exp	non-transmembrane	rplp2l	ribosomal protein, large P2, like [Source:ZFIN;Acc:ZDB-GENE-070327-2]
ENSDARG00000011208	0	71	67	54	0	68	59	62	56.5	67	66	0	0	0	0	0	76	dre_Myel	non-transmembrane	COX5B (1 of 3)	cytochrome c oxidase subunit Vb [Source:HGNC Symbol;Acc:HGNC:2269]
ENSDARG00000011246	0	70	71	73	72	73	60	73	72	72	72	73	74	68	71	0	74	No.Diff.Exp	non-transmembrane	krr1	KRR1, small subunit (SSU) processome component, homolog (yeast) [Source:ZFIN;Acc:ZDB-GENE-060623-10]
ENSDARG00000011247	46	58	43	54	55	0	5	54	53	53	53	62	66	62	63	64	0	No.Diff.Exp	non-transmembrane	rnpc3	RNA-binding region (RNP1, RRM) containing 3 [Source:ZFIN;Acc:ZDB-GENE-060312-35]
ENSDARG00000011312	0	44	89	89	89	88	62	88	87	89	88	93	93	91	92	91	96	No.Diff.Exp	non-transmembrane	stk3	serine/threonine kinase 3 (STE20 homolog, yeast) [Source:ZFIN;Acc:ZDB-GENE-030131-2845]
ENSDARG00000011334	0	0	0	0	0	0	0	0	0	0	0	95	95	93	93	95	95	No.Diff.Exp	non-transmembrane	ncaldb	neurocalcin delta b [Source:ZFIN;Acc:ZDB-GENE-040808-37]
ENSDARG00000011360	0	24	0	14	0	27	23	29	28	29	29	28	41	25	0	33	51	No.Diff.Exp	non-transmembrane	nfatc2ip	nuclear factor of activated T-cells, cytoplasmic, calcineurin-dependent 2 interacting protein [Source:ZFIN;Acc:ZDB-GENE-030131-9520]
ENSDARG00000011376	0	51	52	0	0	0	0	0	0	0	0	59	51.3333	0	0	0	32	No.Diff.Exp	non-transmembrane	zgc:77816	zgc:77816 [Source:ZFIN;Acc:ZDB-GENE-040426-1884]
ENSDARG00000011405	93	68	96	93	0	87	0	95	92	93.5	95	96	96	96	97	47	97	No.Diff.Exp	non-transmembrane	rps9	ribosomal protein S9 [Source:ZFIN;Acc:ZDB-GENE-010724-15]
ENSDARG00000011462	68	70	36	76	73	78	71	79	79	78	78	84	89	88	87	29	91	No.Diff.Exp	non-transmembrane	otub1b	OTU deubiquitinase, ubiquitin aldehyde binding 1b [Source:ZFIN;Acc:ZDB-GENE-040718-204]
ENSDARG00000011488	57	0	64	65	47	56	47	63	63	63	63	73	74	66	70	20	79	No.Diff.Exp	non-transmembrane	sirt2	sirtuin 2 (silent mating type information regulation 2, homolog) 2 (S. cerevisiae) [Source:ZFIN;Acc:ZDB-GENE-030131-1028]
ENSDARG00000011493	48	63	61	64	64	65	65	64	65	65	64	73	73	71	72	70	79	No.Diff.Exp	non-transmembrane	DCUN1D3	DCN1, defective in cullin neddylation 1, domain containing 3 [Source:HGNC Symbol;Acc:HGNC:28734]
ENSDARG00000011496	73	82	81	84	84	82	68	82	81	82	82	82	81	79	73	82	93	No.Diff.Exp	non-transmembrane	ppm1bb	protein phosphatase, Mg2+/Mn2+ dependent, 1Bb [Source:ZFIN;Acc:ZDB-GENE-041114-185]
ENSDARG00000011510	57.5	83	70	45	77	76	51	81	75	76	82	92	91	76	87	87	91	No.Diff.Exp	non-transmembrane	rcc2	regulator of chromosome condensation 2 [Source:ZFIN;Acc:ZDB-GENE-040426-2213]
ENSDARG00000011515	25	77	79	77	78	62	61	79	79	80	80	76	77	74	75	34	77	No.Diff.Exp	transmembrane	orai1a	ORAI calcium release-activated calcium modulator 1a [Source:ZFIN;Acc:ZDB-GENE-110721-1]
ENSDARG00000011545	0	80	73	0	0	63	65	82	82	84	84	0	0	0	0	0	92	No.Diff.Exp	non-transmembrane	arrb2b	arrestin, beta 2b [Source:ZFIN;Acc:ZDB-GENE-040426-1332]
ENSDARG00000011553	44	71	69	71	68	55	43	56	55	58	58	71	80	75	75	79	0	No.Diff.Exp	non-transmembrane	atp5f1	ATP synthase, H+ transporting, mitochondrial Fo complex, subunit B1 [Source:ZFIN;Acc:ZDB-GENE-041010-33]
ENSDARG00000011555	62	64	69	0	0	60	74	73	72	62	73	86	87	78	82	81	0	No.Diff.Exp	non-transmembrane	spag7	sperm associated antigen 7 [Source:ZFIN;Acc:ZDB-GENE-040426-1632]
ENSDARG00000011564	40	51	52	52	53	55	51	56	56	56	56	54	52	57	56	56	60	No.Diff.Exp	transmembrane	sfpq	splicing factor proline/glutamine-rich [Source:ZFIN;Acc:ZDB-GENE-040426-2452]
ENSDARG00000011581	0	0	0	0	0	0	0	0	0	0	0	29	0	10	16	0	0	No.Diff.Exp	non-transmembrane	si:dkey-23k10.5	si:dkey-23k10.5 [Source:ZFIN;Acc:ZDB-GENE-030131-4787]
ENSDARG00000011594	85	94	94	63	94	94	56	94	95	94	94	92	94	95	94	94	99	No.Diff.Exp	non-transmembrane	smarcb1b	SWI/SNF related, matrix associated, actin dependent regulator of chromatin, subfamily b, member 1b [Source:ZFIN;Acc:ZDB-GENE-991008-16]
ENSDARG00000011609	31.3333	59	76	78	67	76	68	77	49	77	77	72	76	72	74	74	79	No.Diff.Exp	non-transmembrane	FOXK2 (1 of 2)	forkhead box K2 [Source:HGNC Symbol;Acc:HGNC:6036]
ENSDARG00000011611	49	95	94	95	93	94	82	94	94	93	94	95	95	93	95	95	99	No.Diff.Exp	non-transmembrane	actr1	ARP1 actin-related protein 1, centractin (yeast) [Source:ZFIN;Acc:ZDB-GENE-040426-2695]
ENSDARG00000011613	69	80	79	81	66	82	58	82	82	51	82	77.5	76	57	77	70	92	No.Diff.Exp	non-transmembrane	rbm39a	RNA binding motif protein 39a [Source:ZFIN;Acc:ZDB-GENE-040426-2852]
ENSDARG00000011648	87	95	96	97	94	94	0	97	97	97	97	94	99	100	99	82	100	No.Diff.Exp	non-transmembrane	snrpd1	small nuclear ribonucleoprotein D1 polypeptide [Source:ZFIN;Acc:ZDB-GENE-020419-14]
ENSDARG00000011665	69	0	84	86	0	81	84.5	83.3333	66.6667	84	84	93	92	70	92	93	92	No.Diff.Exp	non-transmembrane	aldoaa	aldolase a, fructose-bisphosphate, a [Source:ZFIN;Acc:ZDB-GENE-030131-8369]
ENSDARG00000011740	69	70	85	85	0	85	70	85	85	67	85	90	90	89	89	89	91	dre_Tcell	non-transmembrane	u2af2b	U2 small nuclear RNA auxiliary factor 2b [Source:ZFIN;Acc:ZDB-GENE-040426-1881]
ENSDARG00000011824	0	0	0	0	0	0	0	0	0	0	0	24	26	0	14	17	36	No.Diff.Exp	transmembrane	pbxip1b	pre-B-cell leukemia homeobox interacting protein 1b [Source:ZFIN;Acc:ZDB-GENE-070112-2032]
ENSDARG00000011841	0	71	71	0	70	66	54	59.5	63	71	65	69	81	81	79	75.5	85	No.Diff.Exp	non-transmembrane	atp5l	ATP synthase, H+ transporting, mitochondrial F0 complex, subunit g [Source:ZFIN;Acc:ZDB-GENE-030131-5177]
ENSDARG00000011934	0	67	63	64	61	39	54	60	60	63	63	73	75	72	72	73	78	No.Diff.Exp	non-transmembrane	gyg1a	glycogenin 1a [Source:ZFIN;Acc:ZDB-GENE-040426-2910]
ENSDARG00000011941	31.6667	53	48	51	53	50	47	53	53	53	53	45	45	41	55	55	58	No.Diff.Exp	transmembrane	bmpr2a	bone morphogenetic protein receptor, type II a (serine/threonine kinase) [Source:ZFIN;Acc:ZDB-GENE-070618-1]
ENSDARG00000011945	0	75	47	29	72	41	50	69	69	67	70	78	81	70	79	78	87	No.Diff.Exp	transmembrane	slc35e1	solute carrier family 35, member E1 [Source:ZFIN;Acc:ZDB-GENE-040426-2033]
ENSDARG00000012005	0	68	66	69	69	67	53	67	75	75	74	0	0	0	0	0	63	No.Diff.Exp	non-transmembrane	mob2b	MOB kinase activator 2b [Source:ZFIN;Acc:ZDB-GENE-060616-319]
ENSDARG00000012140	0	66	64	64	55	66	44	66	67	67	67	67	66	0	0	0	0	No.Diff.Exp	non-transmembrane	ccnl1b	cyclin L1b [Source:ZFIN;Acc:ZDB-GENE-030131-4813]
ENSDARG00000012141	42	66	70	48	63	69	46	73	73	73	73	74	70	73	75	72	84	No.Diff.Exp	non-transmembrane	papolg	poly(A) polymerase gamma [Source:ZFIN;Acc:ZDB-GENE-040426-1256]
ENSDARG00000012177	0	0	91	97	0	0	0	0	0	0	0	0	0	0	0	0	99	No.Diff.Exp	non-transmembrane	rab4b	RAB4B, member RAS oncogene family [Source:ZFIN;Acc:ZDB-GENE-040822-15]
ENSDARG00000012234	56	67	65	67	75	71	74	73	73	73	73	82	80	84	82	82	84	No.Diff.Exp	non-transmembrane	psme3	proteasome (prosome, macropain) activator subunit 3 (PA28 gamma; Ki) [Source:ZFIN;Acc:ZDB-GENE-991110-19]
ENSDARG00000012244	0	63	95	95	95	95	44	95	73	92	95	62	0	63	0	59	62	No.Diff.Exp	non-transmembrane	ube2e3	ubiquitin-conjugating enzyme E2E 3 (UBC4/5 homolog, yeast) [Source:ZFIN;Acc:ZDB-GENE-030131-408]
ENSDARG00000012247	38	68	57	66	67	63	47	65	65	65	64	75	76	73	74	75	0	No.Diff.Exp	non-transmembrane	def6a	differentially expressed in FDCP 6a homolog (mouse) [Source:ZFIN;Acc:ZDB-GENE-040426-1246]
ENSDARG00000012274	0	63	0	0	0	0	0	0	0	0	0	80	83	77	79	68	87	No.Diff.Exp	non-transmembrane	eif4e1c	eukaryotic translation initiation factor 4E family member 1c [Source:ZFIN;Acc:ZDB-GENE-050417-398]
ENSDARG00000012314	11	73	69	43	75	68	50	69	42	71	75	82	82	77	68	38	59	No.Diff.Exp	non-transmembrane	usp25	ubiquitin specific peptidase 25 [Source:ZFIN;Acc:ZDB-GENE-040426-2847]
ENSDARG00000012340	0	73	76	60	79	44	36	0	0	0	0	89	90	80	85	88	95	No.Diff.Exp	non-transmembrane	ptpn11b	protein tyrosine phosphatase, non-receptor type 11, b [Source:ZFIN;Acc:ZDB-GENE-040426-1158]
ENSDARG00000012399	0	0	0	0	0	0	0	0	0	0	0	85	84	68	80	83	88	No.Diff.Exp	non-transmembrane	adssl	adenylosuccinate synthase, like [Source:ZFIN;Acc:ZDB-GENE-020419-28]
ENSDARG00000012432	43	88	87	87	89	76	53	89	60	90	89	92	92	86	91	90	93	No.Diff.Exp	non-transmembrane	fam76b	family with sequence similarity 76, member B [Source:ZFIN;Acc:ZDB-GENE-030131-6955]
ENSDARG00000012458	62	0	0	0	0	0	0	0	0	0	0	85	78	82	81	84	95	No.Diff.Exp	non-transmembrane	zgc:77849	zgc:77849 [Source:ZFIN;Acc:ZDB-GENE-030131-1107]
ENSDARG00000012499	0	38	40	45	0	44	33	46	46	46	46	60	62	45	58	55	64	No.Diff.Exp	non-transmembrane	per1b	period circadian clock 1b [Source:ZFIN;Acc:ZDB-GENE-040419-1]
ENSDARG00000012505	70	73	87	88	0	87	72	87	87	69	87	92	92	92	91	92	94	No.Diff.Exp	non-transmembrane	u2af2a	U2 small nuclear RNA auxiliary factor 2a [Source:ZFIN;Acc:ZDB-GENE-050706-131]
ENSDARG00000012513	54	66	0	39	54	51	45	56	56	56	56	84	83	81	79	45.5	84	No.Diff.Exp	non-transmembrane	sdcbp2	syndecan binding protein (syntenin) 2 [Source:ZFIN;Acc:ZDB-GENE-030131-3727]
ENSDARG00000012519	10	68	67	68	0	53	61	67	66	66	66	68	70	65	69	68	40	No.Diff.Exp	non-transmembrane	hcfc1b	host cell factor C1b [Source:ZFIN;Acc:ZDB-GENE-030131-2411]
ENSDARG00000012553	0	96	95	0	0	0	0	0	0	0	0	0	0	0	0	0	0	No.Diff.Exp	non-transmembrane	rap1aa	RAP1A, member of RAS oncogene family a [Source:ZFIN;Acc:ZDB-GENE-040625-167]
ENSDARG00000012577	36	73	68	67	60	63	30	70	66	71	71	75	77	73	73	74	81	No.Diff.Exp	non-transmembrane	waca	WW domain containing adaptor with coiled-coil a [Source:ZFIN;Acc:ZDB-GENE-030131-2624]
ENSDARG00000012586	67	79	75	80	78	11	11	79	77	82	82	83	83	76	84	78	84	No.Diff.Exp	non-transmembrane	fmnl2a	formin-like 2a [Source:ZFIN;Acc:ZDB-GENE-081105-70]
ENSDARG00000012588	71	77	0	77	78	65	67	78	76	78	78	86	86	83	86	86	51	No.Diff.Exp	transmembrane	ptdss1a	phosphatidylserine synthase 1a [Source:ZFIN;Acc:ZDB-GENE-040426-837]
ENSDARG00000012591	53	92	80	93	93	93	93	93	93	93	93	94	95	70	94	94	95	No.Diff.Exp	non-transmembrane	pdcd10b	programmed cell death 10b [Source:ZFIN;Acc:ZDB-GENE-040426-2607]
ENSDARG00000012603	29	60	63	60	67	45	43	67	67	0	67	0	0	53	0	0	85	No.Diff.Exp	non-transmembrane	eif3ja	eukaryotic translation initiation factor 3, subunit Ja [Source:ZFIN;Acc:ZDB-GENE-040426-1266]
ENSDARG00000012610	28	39	56	44	55	53	48	56	55	55	56	73	77	62	74	66	18.5	No.Diff.Exp	non-transmembrane	saga	S-antigen; retina and pineal gland (arrestin) a [Source:ZFIN;Acc:ZDB-GENE-040426-1538]
ENSDARG00000012627	57	90	84	43	83	66	67	80.5	84	82	84	94	93	83	90	90	0	No.Diff.Exp	non-transmembrane	cdc34b	cell division cycle 34 homolog (S. cerevisiae) b [Source:ZFIN;Acc:ZDB-GENE-040718-439]
ENSDARG00000012656	0	18	31	37	41	41	33	42	43	43	43	54	52	38	50	29	63	dre_NK	non-transmembrane	atf6	activating transcription factor 6 [Source:ZFIN;Acc:ZDB-GENE-041014-328]
ENSDARG00000012672	73	80	72	82	76	64	62	79	79	79	79	85	84	80	82	78	91	No.Diff.Exp	non-transmembrane	gtf2e2	general transcription factor IIE, polypeptide 2, beta [Source:ZFIN;Acc:ZDB-GENE-030131-6794]
ENSDARG00000012682	0	73	73	81	59	39	38	81	78	81	81	78	88	71	86	88	89	No.Diff.Exp	non-transmembrane	pfn2l	profilin 2 like [Source:ZFIN;Acc:ZDB-GENE-030131-34]
ENSDARG00000012684	0	77	84	84	77	83	73	85	78	85	85	80	81	71	88	87	91	No.Diff.Exp	transmembrane	atp2b1a	ATPase, Ca++ transporting, plasma membrane 1a [Source:ZFIN;Acc:ZDB-GENE-030925-29]
ENSDARG00000012688	0	79	86	92	93	92	92	92	81.25	92	92	95	95	88	78	78	99	No.Diff.Exp	non-transmembrane	eif1b	eukaryotic translation initiation factor 1B [Source:ZFIN;Acc:ZDB-GENE-030131-956]
ENSDARG00000012723	0	20	19	16.6667	11	23	13	24	24	24	24	46	45	40	46	41	58	No.Diff.Exp	non-transmembrane	rbm14a	RNA binding motif protein 14a [Source:ZFIN;Acc:ZDB-GENE-050522-496]
ENSDARG00000012729	39	52	43	47	47	36	29	43	42	44	43	63	65	40	60	53	70	dre_Myel	non-transmembrane	hcls1	hematopoietic cell-specific Lyn substrate 1 [Source:ZFIN;Acc:ZDB-GENE-030131-7191]
ENSDARG00000012747	0	77	85	0	84	57	85	84	84	84	84	0	84	89	88	77.5	58	No.Diff.Exp	transmembrane	rer1	retention in endoplasmic reticulum sorting receptor 1 [Source:ZFIN;Acc:ZDB-GENE-040426-1494]
ENSDARG00000012776	0	87	86	86	86	79	74	83	83	0	83	0	0	0	0	0	90	No.Diff.Exp	non-transmembrane	smarca1	SWI/SNF related, matrix associated, actin dependent regulator of chromatin, subfamily a, member 1 [Source:ZFIN;Acc:ZDB-GENE-070705-296]
ENSDARG00000012818	0	77	79	76	82	46	72	81	81	76	81	85	86	87	86	30	96	No.Diff.Exp	non-transmembrane	csnk2a2a	casein kinase 2, alpha prime polypeptide a [Source:ZFIN;Acc:ZDB-GENE-990415-28]
ENSDARG00000012820	70	62	67	71	64	70	65	71	71	71	71	78	80	76	78	77	84	No.Diff.Exp	non-transmembrane	nop56	NOP56 ribonucleoprotein homolog [Source:ZFIN;Acc:ZDB-GENE-040109-1]
ENSDARG00000012848	0	79	81	81	82	80	80	81	81	81	81	87	87	86	88	88	23	No.Diff.Exp	non-transmembrane	arih2	ariadne homolog 2 (Drosophila) [Source:ZFIN;Acc:ZDB-GENE-040426-2158]
ENSDARG00000012871	32	80	21	76	80	73	80	79	64	75	81	86	86	84	85	42.5	89	No.Diff.Exp	non-transmembrane	npepl1	aminopeptidase-like 1 [Source:ZFIN;Acc:ZDB-GENE-050417-177]
ENSDARG00000012874	42	61	56	45	55	47	41	56	46	55	55	53	69	61	59	68	84	No.Diff.Exp	non-transmembrane	snap23.1	synaptosomal-associated protein 23.1 [Source:ZFIN;Acc:ZDB-GENE-040426-883]
ENSDARG00000012892	0	58	78	71	63	54	50	74	74	53	74	88	86	82	54	85	87	No.Diff.Exp	non-transmembrane	ammecr1	Alport syndrome, mental retardation, midface hypoplasia and elliptocytosis chromosomal region gene 1 homolog (human) [Source:ZFIN;Acc:ZDB-GENE-040426-1533]
ENSDARG00000012987	27	80	80	80	80	74	78	70	76	74	75	86	54	85	65.3333	59	90	No.Diff.Exp	non-transmembrane	gpia	glucose-6-phosphate isomerase a [Source:ZFIN;Acc:ZDB-GENE-020513-2]
ENSDARG00000013014	0	43	33	33.875	34.5	24.5	34.6667	34.3889	34.3478	33.75	33.8889	0	48	48	0	0	58	No.Diff.Exp	transmembrane	or101-1	odorant receptor, family B, subfamily 101, member 1 [Source:ZFIN;Acc:ZDB-GENE-990415-190]
ENSDARG00000013016	0	45	39	0	0	38	38	37	32.5	39	38	42	44	41	43	43	42	No.Diff.Exp	non-transmembrane	pole4	polymerase (DNA-directed), epsilon 4, accessory subunit [Source:ZFIN;Acc:ZDB-GENE-050522-309]
ENSDARG00000013024	38	60	57	56	55	56	56	56	56	57	57	64	66	49.5	63	62	12	No.Diff.Exp	transmembrane	erap1a	endoplasmic reticulum aminopeptidase 1a [Source:ZFIN;Acc:ZDB-GENE-091113-7]
ENSDARG00000013078	77	91	87	91	91	91	42	91	91	91	91	90	88	85	86	88	98	No.Diff.Exp	non-transmembrane	ywhaba	tyrosine 3-monooxygenase/tryptophan 5-monooxygenase activation protein, beta polypeptide a [Source:ZFIN;Acc:ZDB-GENE-030131-6583]
ENSDARG00000013095	43	76	81	81	77	78	36	81	81	82	82	88	88	85	84	84	91	No.Diff.Exp	non-transmembrane	gclc	glutamate-cysteine ligase, catalytic subunit [Source:ZFIN;Acc:ZDB-GENE-030131-5056]
ENSDARG00000013117	20	87	90	0	91	0	0	0	0	0	0	93	94	92	92	93	96	No.Diff.Exp	transmembrane	hiat1a	hippocampus abundant transcript 1a [Source:ZFIN;Acc:ZDB-GENE-030131-834]
ENSDARG00000013122	0	0	0	0	0	0	0	0	0	0	0	0	0	0	0	0	49	No.Diff.Exp	non-transmembrane	maf1	MAF1 homolog, negative regulator of RNA polymerase III [Source:ZFIN;Acc:ZDB-GENE-040426-2788]
ENSDARG00000013144	0	55	56	56	44	53	46	57	57	58	58	55.5	58	55	63	63	70	No.Diff.Exp	transmembrane	atp1b1a	ATPase, Na+/K+ transporting, beta 1a polypeptide [Source:ZFIN;Acc:ZDB-GENE-001127-3]
ENSDARG00000013221	0	58	65	0	0	0	0	0	0	0	0	73	75	69	73	72	71	No.Diff.Exp	non-transmembrane	pde4ca	phosphodiesterase 4C, cAMP-specific a [Source:ZFIN;Acc:ZDB-GENE-070912-373]
ENSDARG00000013250	72	64.5	79	0	78	76	65	78	78	79	79	80	83	66	81	80	84	No.Diff.Exp	non-transmembrane	tars	threonyl-tRNA synthetase [Source:ZFIN;Acc:ZDB-GENE-041010-218]
ENSDARG00000013274	59	80	81	83	81	80	71	82	81	81	83	85	85	0	85	84	89	No.Diff.Exp	non-transmembrane	eif4eb	eukaryotic translation initiation factor 4eb [Source:ZFIN;Acc:ZDB-GENE-041121-14]
ENSDARG00000013307	88	94	93	74.5	92	93	94	94	63.8333	94	94	95.5	95	94	93.5	50.5	92.5	No.Diff.Exp	non-transmembrane	rpl19	ribosomal protein L19 [Source:ZFIN;Acc:ZDB-GENE-040426-2290]
ENSDARG00000013333	40	57	56	52	55	47	19	49	49	50	50	62	68	65	62	66	63	No.Diff.Exp	non-transmembrane	ndufa10	NADH dehydrogenase (ubiquinone) 1 alpha subcomplex, 10 [Source:ZFIN;Acc:ZDB-GENE-030131-670]
ENSDARG00000013351	0	42	52	48	53	47	0	47	47	34	47.5	50	50	45.6667	50	52	81	No.Diff.Exp	non-transmembrane	cirbpb	cold inducible RNA binding protein b [Source:ZFIN;Acc:ZDB-GENE-030131-5841]
ENSDARG00000013360	0	77	74	24	74	63	37	74	72	74	74	0	80	74	0	74	87	No.Diff.Exp	non-transmembrane	sh3gl3a	SH3-domain GRB2-like 3a [Source:ZFIN;Acc:ZDB-GENE-070112-242]
ENSDARG00000013379	46	65	63	58	65	59	61	65	64	58	64	77	77	71	75	68	31	No.Diff.Exp	non-transmembrane	ppp6r3	protein phosphatase 6, regulatory subunit 3 [Source:ZFIN;Acc:ZDB-GENE-030131-3251]
ENSDARG00000013382	44	82	80	72	78	68	0	79	76.5	0	79	89	90	70	87	82	93	No.Diff.Exp	non-transmembrane	cwc15	CWC15 spliceosome-associated protein homolog (S. cerevisiae) [Source:ZFIN;Acc:ZDB-GENE-040625-10]
ENSDARG00000013390	0	55	51	49	0	43	30	42	43	42	42	71	73	60	59	64	80	No.Diff.Exp	non-transmembrane	ARHGAP9	Rho GTPase activating protein 9 [Source:HGNC Symbol;Acc:HGNC:14130]
ENSDARG00000013475	83	88	87	86	87	79	49	87	87	87	87	90	90	78	88	88	93	No.Diff.Exp	non-transmembrane	cct4	chaperonin containing TCP1, subunit 4 (delta) [Source:ZFIN;Acc:ZDB-GENE-040426-1421]
ENSDARG00000013500	6	78	75	74	78	60	66	76	76	0	76	59	84	76	29	78	78	No.Diff.Exp	transmembrane	abca2	ATP-binding cassette, sub-family A (ABC1), member 2 [Source:ZFIN;Acc:ZDB-GENE-050517-1]
ENSDARG00000013505	76	69	0	83	83	83	0	0	0	0	0	0	0	0	0	0	0	No.Diff.Exp	non-transmembrane	ube2kb	ubiquitin-conjugating enzyme E2Kb (UBC1 homolog, yeast) [Source:ZFIN;Acc:ZDB-GENE-980605-9]
ENSDARG00000013539	23	64	61	66	68	67	47	66	66	65	65	73	75	57	72	65	84	No.Diff.Exp	non-transmembrane	ikzf1	IKAROS family zinc finger 1 (Ikaros) [Source:ZFIN;Acc:ZDB-GENE-980526-304]
ENSDARG00000013623	66.5	90	89	86	89	81	78.5	82	82	83	83	89	94	94	93	53.5	97	No.Diff.Exp	non-transmembrane	vdac2	voltage-dependent anion channel 2 [Source:ZFIN;Acc:ZDB-GENE-030131-845]
ENSDARG00000013655	38	47	0	59	58	43.5	48	47	43	48	48	66	61	62	57	39	67	No.Diff.Exp	non-transmembrane	tpd52l2b	tumor protein D52-like 2b [Source:ZFIN;Acc:ZDB-GENE-030131-822]
ENSDARG00000013705	50	72	75	77	78	64	70	75	75	73	73	89	88	81	86	89	89	No.Diff.Exp	non-transmembrane	ccm2	cerebral cavernous malformation 2 [Source:ZFIN;Acc:ZDB-GENE-040712-6]
ENSDARG00000013708	0	89	90	91	91	87	62	82.5	82.5	0	86.5	93	92	92	92	68	96	No.Diff.Exp	non-transmembrane	usp9	ubiquitin specific peptidase 9 [Source:ZFIN;Acc:ZDB-GENE-061019-1]
ENSDARG00000013729	49.5	70	68	69	65	53	64	68	68	68	70	0	0	0	0	0	54	No.Diff.Exp	non-transmembrane	srsf6a	serine/arginine-rich splicing factor 6a [Source:ZFIN;Acc:ZDB-GENE-040426-2824]
ENSDARG00000013804	44	66	63.5	64	0	56	21	63	47.3333	67	64	81	78	65	75	74	86	No.Diff.Exp	non-transmembrane	capns1b	calpain, small subunit 1 b [Source:ZFIN;Acc:ZDB-GENE-030131-5206]
ENSDARG00000013822	0	81	87	88	89	87	89	88	86	88	88	94	95	95	95	95	97	No.Diff.Exp	non-transmembrane	anapc16	anaphase promoting complex subunit 16 [Source:ZFIN;Acc:ZDB-GENE-050417-430]
ENSDARG00000013838	0	0	0	0	0	0	0	0	0	0	0	70	70	8	52	69	9	No.Diff.Exp	transmembrane	sulf2b	sulfatase 2b [Source:ZFIN;Acc:ZDB-GENE-030131-775]
ENSDARG00000013847	41	0	60	60	63	60	48	62	63	63	63	71	66	68	70	68	61	No.Diff.Exp	transmembrane	egfra	epidermal growth factor receptor a (erythroblastic leukemia viral (v-erb-b) oncogene homolog, avian) [Source:ZFIN;Acc:ZDB-GENE-030918-1]
ENSDARG00000013863	0	53	47	60	59	58	0	57	57	0	59	59	66	58	56	56	0	No.Diff.Exp	non-transmembrane	fam133b	family with sequence similarity 133, member B [Source:ZFIN;Acc:ZDB-GENE-060503-229]
ENSDARG00000013892	32	41	62	34	64	60	56	64	0	63	64	35	76	32	44	74	61	dre_Tcell	transmembrane	sorl1	sortilin-related receptor, L(DLR class) A repeats containing [Source:ZFIN;Acc:ZDB-GENE-050208-22]
ENSDARG00000013931	0	88	84	86	87	89	73	88	88	89	89	93	93	92	90	91	85	No.Diff.Exp	non-transmembrane	eif3m	eukaryotic translation initiation factor 3, subunit M [Source:ZFIN;Acc:ZDB-GENE-040426-2643]
ENSDARG00000013938	80	72	86	91	94	91	92	90	86.5	55	90	95	95	95	96	96	97	No.Diff.Exp	non-transmembrane	psmb3	proteasome (prosome, macropain) subunit, beta type, 3 [Source:ZFIN;Acc:ZDB-GENE-040426-2682]
ENSDARG00000013966	70	77	77	75	76	69	77	78	49.5	78	78	0	0	0	0	0	0	No.Diff.Exp	non-transmembrane	psma6b	proteasome (prosome, macropain) subunit, alpha type, 6b [Source:ZFIN;Acc:ZDB-GENE-040718-329]
ENSDARG00000013968	0	55	45	44	33.5	43	39	36	36	38.5	38.5	65	65	64	65	62	71	No.Diff.Exp	transmembrane	psap	prosaposin [Source:ZFIN;Acc:ZDB-GENE-020108-1]
ENSDARG00000013979	0	76	74	44	74.5	75	47	75	75	75	76	0	78	0	75	63	86	No.Diff.Exp	transmembrane	ndfip1	Nedd4 family interacting protein 1 [Source:ZFIN;Acc:ZDB-GENE-030131-2767]
ENSDARG00000013990	68	78	85	0	79	84	68	73.5	75.5	83	83	94	94	95	86	93	92	No.Diff.Exp	transmembrane	ube2q2	ubiquitin-conjugating enzyme E2Q family member 2 [Source:ZFIN;Acc:ZDB-GENE-040426-1919]
ENSDARG00000014004	50	54	59	53	68	60	60	59	58	60	60	74	76	76	73	69	79	No.Diff.Exp	non-transmembrane	eif2b4	eukaryotic translation initiation factor 2B, subunit 4 delta [Source:ZFIN;Acc:ZDB-GENE-030131-955]
ENSDARG00000014013	0	54	0	45	52	51	37	51	50	51	51	0	55	45	40	21	70	No.Diff.Exp	transmembrane	lbr	lamin B receptor [Source:ZFIN;Acc:ZDB-GENE-030804-11]
ENSDARG00000014024	0	24	17	21.5	20	22	20	22.375	22	23.2	21.5	0	0	0	23	0	25	No.Diff.Exp	transmembrane	ms4a17a.4	membrane-spanning 4-domains, subfamily A, member 17A.4 [Source:ZFIN;Acc:ZDB-GENE-070822-16]
ENSDARG00000014083	87	93	92	92	95	77	81	94	91	87	94	95	94	94	91	91	96	No.Diff.Exp	non-transmembrane	wdr82	WD repeat domain 82 [Source:ZFIN;Acc:ZDB-GENE-030131-333]
ENSDARG00000014159	0	35	0	21.5	26	30	16	36	36	36	36	29	33	18	26	27	43	No.Diff.Exp	transmembrane	mtdha	metadherin a [Source:ZFIN;Acc:ZDB-GENE-030616-615]
ENSDARG00000014165	79	91	95	65	93	95	0	95	34	95	95	98	98	99	96	49	98	No.Diff.Exp	transmembrane	ssr3	signal sequence receptor, gamma [Source:ZFIN;Acc:ZDB-GENE-030131-9134]
ENSDARG00000014181	21	76	62	77	78	75	61	76	76	78	75	0	82	0	81	77	69	dre_Tcell	non-transmembrane	foxp1b	forkhead box P1b [Source:ZFIN;Acc:ZDB-GENE-041203-1]
ENSDARG00000014222	84	64	0	90	0	0	0	0	0	0	0	0	0	0	0	0	37	No.Diff.Exp	non-transmembrane	zgc:86598	zgc:86598 [Source:ZFIN;Acc:ZDB-GENE-040625-181]
ENSDARG00000014230	18.5	75	70	75	76	72	63	72	74	73	73	72	77	74.5	63	77.5	84	No.Diff.Exp	non-transmembrane	dlst	dihydrolipoamide S-succinyltransferase [Source:ZFIN;Acc:ZDB-GENE-030326-1]
ENSDARG00000014239	0	30	28	27	0	26	30	29	28	30	30	62	38	39	37	37	36	No.Diff.Exp	transmembrane	esyt1b	extended synaptotagmin-like protein 1b [Source:ZFIN;Acc:ZDB-GENE-040724-209]
ENSDARG00000014244	52.5	72	57	72	75	63.5	56.5	46.4615	66.5	44.6364	56.1	84	86	82	83	83	90	No.Diff.Exp	non-transmembrane	rbmx	RNA binding motif protein, X-linked [Source:ZFIN;Acc:ZDB-GENE-030131-579]
ENSDARG00000014313	0	51	58	56	56	46	0	50	50	49	48	67	0	61	63	63	64	No.Diff.Exp	non-transmembrane	atp5j	ATP synthase, H+ transporting, mitochondrial Fo complex, subunit F6 [Source:ZFIN;Acc:ZDB-GENE-040426-2534]
ENSDARG00000014329	30	42	47	47	47	46	0	46.5	38.4	49	49	66	62	36	68	64	70	No.Diff.Exp	non-transmembrane	npm1a	nucleophosmin 1a (nucleolar phosphoprotein B23, numatrin) [Source:ZFIN;Acc:ZDB-GENE-021028-1]
ENSDARG00000014348	0	0	0	55	55	56	48	55	55	56	55	73	78	71	74	74	75	No.Diff.Exp	non-transmembrane	stk17b	serine/threonine kinase 17b (apoptosis-inducing) [Source:ZFIN;Acc:ZDB-GENE-040426-1499]
ENSDARG00000014361	0	71	70	69	69	61	33	65	66	65	53.3333	0	73	73	0	0	87	No.Diff.Exp	transmembrane	tmbim4	transmembrane BAX inhibitor motif containing 4 [Source:ZFIN;Acc:ZDB-GENE-040426-2152]
ENSDARG00000014366	56	54	63	66	68	69	40	68	68	69	69	74	79	67	77	60	82	No.Diff.Exp	non-transmembrane	luc7l3	LUC7-like 3 pre-mRNA splicing factor [Source:ZFIN;Acc:ZDB-GENE-060616-375]
ENSDARG00000014439	0	64	64	67	70	64	65	66	65	66	66	0	74	33	69	56	77	No.Diff.Exp	non-transmembrane	dgkza	diacylglycerol kinase, zeta a [Source:ZFIN;Acc:ZDB-GENE-111104-3]
ENSDARG00000014463	38	48	23	0	16	46	43	45	45	46	46	59	55	60	57	58	67	No.Diff.Exp	non-transmembrane	usf1l	upstream transcription factor 1, like [Source:ZFIN;Acc:ZDB-GENE-040426-2269]
ENSDARG00000014480	0	0	0	0	0	0	0	0	0	0	0	0	0	0	0	0	0	No.Diff.Exp	non-transmembrane	nr6a1b	nuclear receptor subfamily 6, group A, member 1b [Source:ZFIN;Acc:ZDB-GENE-040724-202]
ENSDARG00000014498	39	69	57	70	63	70	36	71	66	71	71	81	75	72	73	72	87	No.Diff.Exp	non-transmembrane	ythdf2	YTH N(6)-methyladenosine RNA binding protein 2 [Source:ZFIN;Acc:ZDB-GENE-040426-948]
ENSDARG00000014499	0	0	0	0	0	0	0	0	0	0	0	0	0	60	0	0	91	No.Diff.Exp	non-transmembrane	nutf2l	nuclear transport factor 2, like [Source:ZFIN;Acc:ZDB-GENE-020416-1]
ENSDARG00000014506	26	57	53	47	38	35	36	37	36.5	31	31	56	57	0	51	53	61	No.Diff.Exp	transmembrane	tmem126a	transmembrane protein 126A [Source:ZFIN;Acc:ZDB-GENE-040426-1770]
ENSDARG00000014536	0	0	77	79	77	78	71	78	78	79	78	77	78	74	72	72	91	No.Diff.Exp	non-transmembrane	pfdn1	prefoldin subunit 1 [Source:ZFIN;Acc:ZDB-GENE-050306-50]
ENSDARG00000014569	71	83	71	83	83	73	75	85	85	85	85	86	89	74	88	89	93	No.Diff.Exp	non-transmembrane	hnrnpr	heterogeneous nuclear ribonucleoprotein R [Source:ZFIN;Acc:ZDB-GENE-040426-2766]
ENSDARG00000014571	56.4	96	96	96	96	96	85	96	96	96	96	94	94	92	95	95	97	No.Diff.Exp	non-transmembrane	ctnnb1	catenin (cadherin-associated protein), beta 1 [Source:ZFIN;Acc:ZDB-GENE-980526-362]
ENSDARG00000014591	0	81	80	0	89	89	89	89	75	89	89	96	96	95	94	86	96	dre_Tcell	non-transmembrane	ilf2	interleukin enhancer binding factor 2 [Source:ZFIN;Acc:ZDB-GENE-040426-2345]
ENSDARG00000014592	19	62	25.5	32	64	61	41	70	71	70	70	67	67	65	65	51	86	No.Diff.Exp	non-transmembrane	DENND1A	DENN/MADD domain containing 1A [Source:HGNC Symbol;Acc:HGNC:29324]
ENSDARG00000014676	0	56	70	73	70	71	61	65	71	71	71	74	74	75	76	74	75	No.Diff.Exp	non-transmembrane	bckdhb	branched chain keto acid dehydrogenase E1, beta polypeptide [Source:ZFIN;Acc:ZDB-GENE-030124-2]
ENSDARG00000014690	62.5	65	92	92	92	61	87	89	91	90.25	89.3333	94	94	90	95	94	92	No.Diff.Exp	non-transmembrane	rps4x	ribosomal protein S4, X-linked [Source:ZFIN;Acc:ZDB-GENE-040927-19]
ENSDARG00000014692	49	61	64	63	53	57	62	64	57.5	64	64	68	69	42	67	40.5	66	No.Diff.Exp	non-transmembrane	znf622	zinc finger protein 622 [Source:ZFIN;Acc:ZDB-GENE-050927-1]
ENSDARG00000014763	96	97	98	97	97	97	0	96	96	97	84.5	0	0	0	0	0	100	No.Diff.Exp	non-transmembrane	arf2	ADP-ribosylation factor 2 [Source:ZFIN;Acc:ZDB-GENE-040122-4]
ENSDARG00000014794	24	52	59	59	56	53	29	54	53	55	56	63	67	0	63	63	53	No.Diff.Exp	non-transmembrane	uqcrc2a	ubiquinol-cytochrome c reductase core protein IIa [Source:ZFIN;Acc:ZDB-GENE-040718-405]
ENSDARG00000014817	0	66	61	64	66	57	63	63	63	63	62	69	69	66	62	62	0	No.Diff.Exp	non-transmembrane	ranbp1	RAN binding protein 1 [Source:ZFIN;Acc:ZDB-GENE-040426-2548]
ENSDARG00000014867	72	76.5	96	96	96	97	97	97	96.5	97	97	97	98	98	98	98	96	No.Diff.Exp	non-transmembrane	rpl8	ribosomal protein L8 [Source:ZFIN;Acc:ZDB-GENE-040426-1670]
ENSDARG00000014898	77	85	82	75	79	79	77	79	79	79	71	92	91	88	87	87	90	No.Diff.Exp	non-transmembrane	ncbp2	nuclear cap binding protein subunit 2 [Source:ZFIN;Acc:ZDB-GENE-020419-31]
ENSDARG00000014914	23	35	27	0	31	27	22	29	27	0	28	38	34	31	33	20	39	No.Diff.Exp	transmembrane	lamp2	lysosomal-associated membrane protein 2 [Source:ZFIN;Acc:ZDB-GENE-030729-9]
ENSDARG00000014915	37	59	61	53	61	63	51	67	65	63	63	61	64	57	61	61	0	No.Diff.Exp	non-transmembrane	ndufab1b	NADH dehydrogenase (ubiquinone) 1, alpha/beta subcomplex, 1b [Source:ZFIN;Acc:ZDB-GENE-030131-4437]
ENSDARG00000015003	0	53	0	0	0	0	0	0	0	0	0	0	0	0	0	0	85	No.Diff.Exp	non-transmembrane	arhgap4b	Rho GTPase activating protein 4b [Source:ZFIN;Acc:ZDB-GENE-090311-38]
ENSDARG00000015050	99	0	0	100	99	0	0	100	87	0	100	99	0	99	99.5	0	100	No.Diff.Exp	non-transmembrane	calm2b	calmodulin 2b, (phosphorylase kinase, delta) [Source:ZFIN;Acc:ZDB-GENE-020415-2]
ENSDARG00000015068	50	66	0	0	63	62	48	62	62	62	62	73	75	0	0	0	75	No.Diff.Exp	non-transmembrane	TXK	TXK tyrosine kinase [Source:HGNC Symbol;Acc:HGNC:12434]
ENSDARG00000015111	84	95	92	93	0	94	79	93	93	80	92	0	0	0	0	0	0	No.Diff.Exp	non-transmembrane	ddx39ab	DEAD (Asp-Glu-Ala-Asp) box polypeptide 39Ab [Source:ZFIN;Acc:ZDB-GENE-040426-2902]
ENSDARG00000015126	42	65	55	65	61	65	66	66	58	65	65	71	68	69	70	69	78	No.Diff.Exp	non-transmembrane	gorasp2	golgi reassembly stacking protein 2 [Source:ZFIN;Acc:ZDB-GENE-040426-1659]
ENSDARG00000015128	93	93.5	94	95	96	96	55	96	81.1667	96	96	98	99	98	99	98	89	No.Diff.Exp	non-transmembrane	rpl27	ribosomal protein L27 [Source:ZFIN;Acc:ZDB-GENE-030131-4343]
ENSDARG00000015149	0	30	27	32	0	16	18	34	34	0	33	40	40	30	39	24	43	No.Diff.Exp	non-transmembrane	wasa	Wiskott-Aldrich syndrome (eczema-thrombocytopenia) a [Source:ZFIN;Acc:ZDB-GENE-081104-419]
ENSDARG00000015161	0	67	65	0	0	40	56	65	57	67	65	0	0	0	0	0	81	No.Diff.Exp	non-transmembrane	zgc:92664	zgc:92664 [Source:ZFIN;Acc:ZDB-GENE-040718-119]
ENSDARG00000015164	45	65	72	59	63	71	49	68	72	63	73	85	86	83	85	85	89	No.Diff.Exp	non-transmembrane	mknk2b	MAP kinase interacting serine/threonine kinase 2b [Source:ZFIN;Acc:ZDB-GENE-030829-2]
ENSDARG00000015201	63	81	81	72	64	59	53	74	63	72	75	87	90	77	79	77	91	No.Diff.Exp	transmembrane	pcmt	protein-L-isoaspartate (D-aspartate) O-methyltransferase [Source:ZFIN;Acc:ZDB-GENE-990415-134]
ENSDARG00000015208	0	89	87	0	86	74	0	84	84	83	83	90	90	90	84	84	92	No.Diff.Exp	non-transmembrane	rbb4l	retinoblastoma binding protein 4, like [Source:ZFIN;Acc:ZDB-GENE-030131-848]
ENSDARG00000015278	0	14	32	23	34	35	29	36	36	36	36	17.6667	26	26	25	22.5	49	No.Diff.Exp	transmembrane	plxnc1	plexin C1 [Source:ZFIN;Acc:ZDB-GENE-030131-1620]
ENSDARG00000015292	0	99	98	91	91	99	88	99	99	90	99	98	98	96	90	81.6667	0	No.Diff.Exp	non-transmembrane	ube2g1a	ubiquitin-conjugating enzyme E2G 1a (UBC7 homolog, yeast) [Source:ZFIN;Acc:ZDB-GENE-030131-6065]
ENSDARG00000015314	77	59	92	92	93	94	86	94	94	94	94	92	92	92	91	91	95	No.Diff.Exp	non-transmembrane	zc4h2	zinc finger, C4H2 domain containing [Source:ZFIN;Acc:ZDB-GENE-030131-2207]
ENSDARG00000015315	95	98	97	97	98	98	98	98	98	98	98	97	98	90	98	98	99	No.Diff.Exp	non-transmembrane	psmc5	proteasome (prosome, macropain) 26S subunit, ATPase, 5 [Source:ZFIN;Acc:ZDB-GENE-030131-6547]
ENSDARG00000015325	0	74	75	93	91	61	55	92	92	90	92	85	86	85	85	85	93	No.Diff.Exp	non-transmembrane	u2af1	U2 small nuclear RNA auxiliary factor 1 [Source:ZFIN;Acc:ZDB-GENE-020419-1]
ENSDARG00000015374	0	32	60	51	50	60	45	59	59	56	59	0	0	0	0	0	72	No.Diff.Exp	transmembrane	st3gal3a	ST3 beta-galactoside alpha-2,3-sialyltransferase 3a [Source:ZFIN;Acc:ZDB-GENE-040426-1322]
ENSDARG00000015385	0	65	72	75	73	63	70	75	74	75	75	81	81	70	79	79	82	No.Diff.Exp	non-transmembrane	ndufs3	NADH dehydrogenase (ubiquinone) Fe-S protein 3, (NADH-coenzyme Q reductase) [Source:ZFIN;Acc:ZDB-GENE-050417-274]
ENSDARG00000015392	0	92	89	88	93	91	0	91	91	92	92	89.5	92	0	93	86	96	No.Diff.Exp	non-transmembrane	dhx15	DEAH (Asp-Glu-Ala-His) box helicase 15 [Source:ZFIN;Acc:ZDB-GENE-030131-650]
ENSDARG00000015427	80	69	91	88	89	78	74	87.5	87	85	88	92	91	88.5	91	88.5	97	No.Diff.Exp	non-transmembrane	hdac1	histone deacetylase 1 [Source:ZFIN;Acc:ZDB-GENE-020419-32]
ENSDARG00000015474	71	91	88	91	85	70	71	90	90	90	90	92	93	88	91	90	96	No.Diff.Exp	non-transmembrane	ppp2r5ea	protein phosphatase 2, regulatory subunit B', epsilon isoform a [Source:ZFIN;Acc:ZDB-GENE-030904-7]
ENSDARG00000015495	0	0	0	0	0	0	0	0	0	0	0	42	41	36	44	32	0	No.Diff.Exp	non-transmembrane	klf3	Kruppel-like factor 3 (basic) [Source:ZFIN;Acc:ZDB-GENE-011116-1]
ENSDARG00000015524	0	93	92	20	94	93	77	91.6667	82	93	90.5	93	93	93	0	91	96	No.Diff.Exp	non-transmembrane	prps1a	phosphoribosyl pyrophosphate synthetase 1A [Source:ZFIN;Acc:ZDB-GENE-011212-5]
ENSDARG00000015538	51	63	60	44	70	61	59	69	66	69	69	71	68.5	66	0	66	40	No.Diff.Exp	non-transmembrane	znf207a	zinc finger protein 207, a [Source:ZFIN;Acc:ZDB-GENE-040426-2273]
ENSDARG00000015551	60.75	83	80	63	78	76	0	53.375	55.1429	62.5	67.6667	86	90	0	87	88	82	No.Diff.Exp	non-transmembrane	fth1a	ferritin, heavy polypeptide 1a [Source:ZFIN;Acc:ZDB-GENE-000831-2]
ENSDARG00000015566	30	50	63	63	66	13	50.5	66	66	66	66	53.5	70	63	65	64	49	No.Diff.Exp	non-transmembrane	dnmt3ab	DNA (cytosine-5-)-methyltransferase 3 alpha b [Source:ZFIN;Acc:ZDB-GENE-050314-3]
ENSDARG00000015575	35	37.3333	44.8333	43	49.5	40	34.3333	46.7778	46.8	43.25	47.2	45.75	40.8	39	50	53	70.5	No.Diff.Exp	transmembrane	cyp3c1	cytochrome P450, family 3, subfamily c, polypeptide 1 [Source:ZFIN;Acc:ZDB-GENE-030131-3060]
ENSDARG00000015576	20	50	46	45	47	45	0	0	45	45	45	54	58	50	53	0	66	dre_NK	transmembrane	itprip	inositol 1,4,5-trisphosphate receptor interacting protein [Source:ZFIN;Acc:ZDB-GENE-050417-422]
ENSDARG00000015638	48	68	67	65	67	57	61	68	68	68	68	68	71	58	68	67	76	No.Diff.Exp	non-transmembrane	gemin2	gem (nuclear organelle) associated protein 2 [Source:ZFIN;Acc:ZDB-GENE-030131-3756]
ENSDARG00000015649	0	91	92	89	73	93	43	45	46	44	93	99	98	98	98	96	99	No.Diff.Exp	non-transmembrane	rap2c	RAP2C, member of RAS oncogene family [Source:ZFIN;Acc:ZDB-GENE-041024-1]
ENSDARG00000015653	24	39	36	43	40	38	32	42	42	43	43	67	68	51	62	53	70	No.Diff.Exp	non-transmembrane	tnip1	TNFAIP3 interacting protein 1 [Source:ZFIN;Acc:ZDB-GENE-070112-1502]
ENSDARG00000015722	21	73	81	80	80	83	57	85	86	70	85	0	0	0	0	0	0	No.Diff.Exp	non-transmembrane	kctd5a	potassium channel tetramerization domain containing 5a [Source:ZFIN;Acc:ZDB-GENE-030131-727]
ENSDARG00000015752	0	71	64	0	72	62	61	66	40.6667	66	66	73	65	63	71	71	82	No.Diff.Exp	non-transmembrane	zap70	zeta-chain (TCR) associated protein kinase [Source:ZFIN;Acc:ZDB-GENE-050522-257]
ENSDARG00000015757	0	86	79	64	0	83	74	87	85	85	84	89	90	90	84	87	93	No.Diff.Exp	transmembrane	tmem50a	transmembrane protein 50A [Source:ZFIN;Acc:ZDB-GENE-040426-2937]
ENSDARG00000015829	17	48	45	45	45	39	36	43	43	43	43	55	64	0	61	56	73	No.Diff.Exp	non-transmembrane	mov10a	Mov10 RISC complex RNA helicase a [Source:ZFIN;Acc:ZDB-GENE-091230-8]
ENSDARG00000015851	26	55	54	55	49	54	45	58	58	57	57	51	53	31	51	45	60	No.Diff.Exp	non-transmembrane	pnn	pinin, desmosome associated protein [Source:ZFIN;Acc:ZDB-GENE-060519-3]
ENSDARG00000015862	50	87	88	68	86	86	77	86	85	87	87	88	90	88	88	89	93	No.Diff.Exp	non-transmembrane	rpl5b	ribosomal protein L5b [Source:ZFIN;Acc:ZDB-GENE-040625-93]
ENSDARG00000015887	0	0	30	38.5	39	47	36	41	47	45	45	57	57	48	42	44	64	No.Diff.Exp	transmembrane	b2ml	beta-2-microglobulin, like [Source:ZFIN;Acc:ZDB-GENE-040426-2136]
ENSDARG00000015891	0	71	72	0	73	61	54	71	71	72	72	82	82	72	80	78	75	No.Diff.Exp	transmembrane	ptprea	protein tyrosine phosphatase, receptor type, E, a [Source:ZFIN;Acc:ZDB-GENE-100714-1]
ENSDARG00000015915	70	84	78	82	82	66	51	52	44	84	84	86	78	84	83	84.5	86	No.Diff.Exp	transmembrane	slc25a36b	solute carrier family 25 (pyrimidine nucleotide carrier ), member 36b [Source:ZFIN;Acc:ZDB-GENE-080219-28]
ENSDARG00000015922	0	72	34	0	0	0	0	0	0	0	0	78	78	72	78	77	78	No.Diff.Exp	non-transmembrane	zgc:153952	zgc:153952 [Source:ZFIN;Acc:ZDB-GENE-061103-427]
ENSDARG00000015930	67	75	76	76	75	60	41	79	79	78	78	82	83	70	81	64	85	No.Diff.Exp	non-transmembrane	rwdd1	RWD domain containing 1 [Source:ZFIN;Acc:ZDB-GENE-040718-270]
ENSDARG00000015978	0	75	75	58	0	63	56	62	57	63	63	75.5	56	77.5	87	82	0	No.Diff.Exp	non-transmembrane	COX5B (2 of 3)	cytochrome c oxidase subunit Vb [Source:HGNC Symbol;Acc:HGNC:2269]
ENSDARG00000015990	11.5	73	72	73	0	56	65	72	71	71	71	76	78	73	76	75	0	No.Diff.Exp	non-transmembrane	hcfc1a	host cell factor C1a [Source:ZFIN;Acc:ZDB-GENE-030912-10]
ENSDARG00000016016	19	56	54	57	50	40	46	54	53	54	54	64	65	61	59	59	68	No.Diff.Exp	non-transmembrane	dbnlb	drebrin-like b [Source:ZFIN;Acc:ZDB-GENE-050522-293]
ENSDARG00000016058	71	57	73	0	0	60	0	72	73	73	73	88	89	86	87	87	94	No.Diff.Exp	non-transmembrane	fibpa	fibroblast growth factor (acidic) intracellular binding protein a [Source:ZFIN;Acc:ZDB-GENE-040426-1363]
ENSDARG00000016085	0	73	72	60	73	64	73	59	59	63	63	77	78	68	77	77	87	No.Diff.Exp	non-transmembrane	mbnl3	muscleblind-like splicing regulator 3 [Source:ZFIN;Acc:ZDB-GENE-081002-3]
ENSDARG00000016086	3	74	88	90	90	87	60	91	91	92	92	91	91	80	90	87.5	98	No.Diff.Exp	non-transmembrane	smurf1	SMAD specific E3 ubiquitin protein ligase 1 [Source:ZFIN;Acc:ZDB-GENE-040426-2744]
ENSDARG00000016154	0	59	40	0	0	55	55	54	54	45	55	64	63	0	64	65	79	No.Diff.Exp	non-transmembrane	zfp36l1a	zinc finger protein 36, C3H type-like 1a [Source:ZFIN;Acc:ZDB-GENE-030131-9860]
ENSDARG00000016156	18	35	0	42	41	41	24	40	40	41	41	54	54	44	51	52	58	dre_Tcell	non-transmembrane	fam53b	family with sequence similarity 53, member B [Source:ZFIN;Acc:ZDB-GENE-040426-2495]
ENSDARG00000016173	59	82	34	85	22.5	85	64	85	86	85	85	87	88	85	47.5	88	93	dre_Tcell	non-transmembrane	cct3	chaperonin containing TCP1, subunit 3 (gamma) [Source:ZFIN;Acc:ZDB-GENE-020419-5]
ENSDARG00000016188	37	31	50	20	57	43	44	54	54	51	55	66	65	63	61	24.5	64	No.Diff.Exp	non-transmembrane	SBNO2 (1 of 2)	strawberry notch homolog 2 (Drosophila) [Source:HGNC Symbol;Acc:HGNC:29158]
ENSDARG00000016213	0	52	0	65	0	0	0	0	0	0	0	75	75	0	0	0	82	No.Diff.Exp	non-transmembrane	BX088711.1
ENSDARG00000016238	0	63	39	61	57	42	43	61	61	60	60	77	79	83	83	81	54.5	No.Diff.Exp	transmembrane	arl6ip5b	ADP-ribosylation factor-like 6 interacting protein 5b [Source:ZFIN;Acc:ZDB-GENE-040718-223]
ENSDARG00000016256	0	81	0	80	81	84	71	81	80	84	84	0	0	0	0	0	0	No.Diff.Exp	non-transmembrane	nudt3a	nudix (nucleoside diphosphate linked moiety X)-type motif 3a [Source:ZFIN;Acc:ZDB-GENE-040426-792]
ENSDARG00000016302	89	61	83	0	93	91	66	95	95	82	95	93	96	95	95	95	37.5	No.Diff.Exp	non-transmembrane	upf1	upf1 regulator of nonsense transcripts homolog (yeast) [Source:ZFIN;Acc:ZDB-GENE-040426-2836]
ENSDARG00000016318	57	76	76	78	80	76	0	76	76	76	76	80	81	81	77	66	85	No.Diff.Exp	non-transmembrane	med7	mediator complex subunit 7 [Source:ZFIN;Acc:ZDB-GENE-030131-4823]
ENSDARG00000016345	17	47	47	46	49	51	50	50	51	51	51	54	57	44	55	55	31	No.Diff.Exp	non-transmembrane	ncoa5	nuclear receptor coactivator 5 [Source:ZFIN;Acc:ZDB-GENE-040912-155]
ENSDARG00000016350	59	67	64	65	66	66	68	66	66	67	66	77	79	70	78	75	84	No.Diff.Exp	non-transmembrane	cap1	CAP, adenylate cyclase-associated protein 1 (yeast) [Source:ZFIN;Acc:ZDB-GENE-030131-6459]
ENSDARG00000016363	0	0	0	0	0	0	0	0	0	0	0	0	0	0	0	0	70	No.Diff.Exp	non-transmembrane	her8a	hairy-related 8a [Source:ZFIN;Acc:ZDB-GENE-030131-2376]
ENSDARG00000016393	96	98	99	98	98	98	0	97	97	98	85	98	98	0	98	98	99	No.Diff.Exp	non-transmembrane	arf1l	ADP-ribosylation factor 1 like [Source:ZFIN;Acc:ZDB-GENE-030131-5234]
ENSDARG00000016443	0	78	75	76	6	74	49	73	73	50	75	86	47	82	84	82	86	No.Diff.Exp	non-transmembrane	eif3c	eukaryotic translation initiation factor 3, subunit C [Source:ZFIN;Acc:ZDB-GENE-030131-6166]
ENSDARG00000016447	39	70	71	73	73	69	0	72	72	71	71	76	74	76	77	74	95	No.Diff.Exp	non-transmembrane	ythdf1	YTH N(6)-methyladenosine RNA binding protein 1 [Source:ZFIN;Acc:ZDB-GENE-040426-2786]
ENSDARG00000016477	0	89.5	94	94	89	82	91	94	94	94	94	97	97	93	90	76	99	No.Diff.Exp	non-transmembrane	eif4a2	eukaryotic translation initiation factor 4A, isoform 2 [Source:ZFIN;Acc:ZDB-GENE-040426-2802]
ENSDARG00000016484	0	77	78	77	79	54	67	75	72	75	77	82	81	70	79	66	90	No.Diff.Exp	non-transmembrane	dkc1	dyskeratosis congenita 1, dyskerin [Source:ZFIN;Acc:ZDB-GENE-031118-120]
ENSDARG00000016494	0	62	69	70	73	72	44	74	73	72	72	79	80	62	76	0	40	No.Diff.Exp	non-transmembrane	ddc	dopa decarboxylase [Source:ZFIN;Acc:ZDB-GENE-040426-2656]
ENSDARG00000016505	37	25	54	51	51	52	35	51	52	53	53	44	46.5	22	41	43	9	No.Diff.Exp	non-transmembrane	apbb1ip	amyloid beta (A4) precursor protein-binding, family B, member 1 interacting protein [Source:ZFIN;Acc:ZDB-GENE-040426-1318]
ENSDARG00000016513	55	34	70	31.5	47.6667	63	37	71	61.5	71	71	76	75	67	72	71	55	No.Diff.Exp	non-transmembrane	setd3	SET domain containing 3 [Source:ZFIN;Acc:ZDB-GENE-030131-9137]
ENSDARG00000016516	52	94	41	0	0	81	69	92.5	94	94	94	94	96	83	95	92	98	No.Diff.Exp	non-transmembrane	rbm8a	RNA binding motif protein 8A [Source:ZFIN;Acc:ZDB-GENE-050306-51]
ENSDARG00000016541	0	48	44	42	46	39	46	47	46	47	47	62	63	50	58	57	49	No.Diff.Exp	non-transmembrane	SASH3	SAM and SH3 domain containing 3 [Source:HGNC Symbol;Acc:HGNC:15975]
ENSDARG00000016548	57	67	62	68	69	68	55	69	67.5	69	70	51	71	59	70	58	79	No.Diff.Exp	non-transmembrane	eif5b	eukaryotic translation initiation factor 5B [Source:ZFIN;Acc:ZDB-GENE-050208-20]
ENSDARG00000016687	22	62	44	0	0	50	64	66	68	68	69	84	83	75	83	81	86	No.Diff.Exp	non-transmembrane	acadvl	acyl-CoA dehydrogenase, very long chain [Source:ZFIN;Acc:ZDB-GENE-030131-899]
ENSDARG00000016695	31	53	51	0	54	53	44	53	53	53	52	66	66	65	67	67	64	No.Diff.Exp	transmembrane	p2rx1	purinergic receptor P2X, ligand-gated ion channel, 1 [Source:ZFIN;Acc:ZDB-GENE-030319-1]
ENSDARG00000016721	28.5	77	73	80	81	78	41	79	78	80	79	84	85	84	85	85	88	No.Diff.Exp	non-transmembrane	sdha	succinate dehydrogenase complex, subunit A, flavoprotein (Fp) [Source:ZFIN;Acc:ZDB-GENE-040426-874]
ENSDARG00000016724	0	42	30	40	41	40	27	39	37	40	39	42	45	33	0	11	48	No.Diff.Exp	non-transmembrane	C15H11orf57	chromosome 11 open reading frame 57 [Source:HGNC Symbol;Acc:HGNC:25569]
ENSDARG00000016754	64	74	77	72	80	76	0	76	73.5	75	60	83	0	76	72	69	93	No.Diff.Exp	non-transmembrane	tbca	tubulin cofactor a [Source:ZFIN;Acc:ZDB-GENE-040426-962]
ENSDARG00000016774	0	16	20	23	27	20	19	24	24	24	20	30	26	22	21	0	40	dre_Myel	non-transmembrane	plekho2	pleckstrin homology domain containing, family O member 2 [Source:ZFIN;Acc:ZDB-GENE-120406-4]
ENSDARG00000016775	29	76	73	74	74	72	50	72	73	73	73	79	79	78	70	77	83	No.Diff.Exp	non-transmembrane	aqr	aquarius intron-binding spliceosomal factor [Source:ZFIN;Acc:ZDB-GENE-040426-1189]
ENSDARG00000016782	0	72	75	78	0	72	65	77	66	51	77	89	87	86	86	40	94	No.Diff.Exp	non-transmembrane	huwe1	HECT, UBA and WWE domain containing 1 [Source:ZFIN;Acc:ZDB-GENE-081104-387]
ENSDARG00000016783	53	73	71	74	65	53	68	74	74	72	74	85	76	77	81	75	86	No.Diff.Exp	non-transmembrane	srsf6b	serine/arginine-rich splicing factor 6b [Source:ZFIN;Acc:ZDB-GENE-041219-1]
ENSDARG00000016809	40	90	88	89	87	88	56	88	88	88	88	89	91	89	91	91	33	No.Diff.Exp	non-transmembrane	prkacab	protein kinase, cAMP-dependent, catalytic, alpha, genome duplicate b [Source:ZFIN;Acc:ZDB-GENE-040801-208]
ENSDARG00000016830	27	73	58	50	68	55	59	58	58	64	64	79	79	37	79	79	71	No.Diff.Exp	non-transmembrane	rimkla	ribosomal modification protein rimK-like family member A [Source:ZFIN;Acc:ZDB-GENE-040912-20]
ENSDARG00000016871	54	47	75	73	74	74	31	74	65.5	74	74	73	75	43	73	72	84	No.Diff.Exp	non-transmembrane	smarce1	SWI/SNF related, matrix associated, actin dependent regulator of chromatin, subfamily e, member 1 [Source:ZFIN;Acc:ZDB-GENE-030131-967]
ENSDARG00000016889	0	85	86	89	0	88	82	88	88	89	89	95	97	93	0	92	0	No.Diff.Exp	non-transmembrane	eif3g	eukaryotic translation initiation factor 3, subunit G [Source:ZFIN;Acc:ZDB-GENE-040426-1076]
ENSDARG00000016904	0	62	66	73	0	60	46	73	74	74	74	83	83	82	82	82	89	No.Diff.Exp	non-transmembrane	bckdk	branched chain ketoacid dehydrogenase kinase [Source:ZFIN;Acc:ZDB-GENE-021204-1]
ENSDARG00000016939	30	52	44	47	50	47	43	42.5	49	50	50	46	38	52	51	37.5	66	No.Diff.Exp	transmembrane	itgb2	integrin, beta 2 [Source:ZFIN;Acc:ZDB-GENE-110411-4]
ENSDARG00000016968	30	57	18	55	51	52	49	51	51	53	53	66	62	65	64	63	69	No.Diff.Exp	non-transmembrane	tmem214	transmembrane protein 214 [Source:ZFIN;Acc:ZDB-GENE-110307-2]
ENSDARG00000017037	0	33	29	31	0	27	23	31	31	30	31	53	56	51	53	0	60	No.Diff.Exp	non-transmembrane	ikbkg	inhibitor of kappa light polypeptide gene enhancer in B-cells, kinase gamma [Source:ZFIN;Acc:ZDB-GENE-050327-68]
ENSDARG00000017047	0	74	41	47	69	63	67	69	69	70	70	80	82	80	79	80	64	No.Diff.Exp	transmembrane	slc27a4	solute carrier family 27 (fatty acid transporter), member 4 [Source:ZFIN;Acc:ZDB-GENE-050417-248]
ENSDARG00000017084	0	88	97	98	97	96	74	69	96	96	96	96	98	99	97	94	78	No.Diff.Exp	non-transmembrane	bud31	BUD31 homolog (S. cerevisiae) [Source:ZFIN;Acc:ZDB-GENE-040720-3]
ENSDARG00000017086	0	0	51	56	56	56	47	56	56	56	56	58	59	41	68	66	64	No.Diff.Exp	non-transmembrane	asb12a	ankyrin repeat and SOCS box-containing 12a [Source:ZFIN;Acc:ZDB-GENE-030131-1647]
ENSDARG00000017143	0	69	61	67	67	47	49	65	66	48	67	73	77	71	75	70	12	No.Diff.Exp	non-transmembrane	brd9	bromodomain containing 9 [Source:ZFIN;Acc:ZDB-GENE-060502-1]
ENSDARG00000017219	61	91	47.6667	90	80	87	0	69.25	69.5	60.5	70.3333	92	92	92	91	89	80	No.Diff.Exp	non-transmembrane	pabpc1a	poly(A) binding protein, cytoplasmic 1a [Source:ZFIN;Acc:ZDB-GENE-030131-3238]
ENSDARG00000017229	30	78	73	76	77	75	66	78	78	77	77	9	75	58	0	0	78	No.Diff.Exp	transmembrane	megf10	multiple EGF-like-domains 10 [Source:ZFIN;Acc:ZDB-GENE-080506-1]
ENSDARG00000017230	76	87	79	79	87	88	62	88	86	88	88	92	92	93	92	91	94	No.Diff.Exp	non-transmembrane	fbxw11b	F-box and WD repeat domain containing 11b [Source:ZFIN;Acc:ZDB-GENE-040426-2903]
ENSDARG00000017235	0	77	79	75	75	75	75	75	75	75	75	81	80	67	72	74	90	dre_Myel	non-transmembrane	eif5a	eukaryotic translation initiation factor 5A [Source:ZFIN;Acc:ZDB-GENE-040426-2229]
ENSDARG00000017294	0	93	85	81	88	92	77	92	92	92	92	94	84	91	93	91	90	No.Diff.Exp	non-transmembrane	gnai2b	guanine nucleotide binding protein (G protein), alpha inhibiting activity polypeptide 2b [Source:ZFIN;Acc:ZDB-GENE-030131-5861]
ENSDARG00000017338	15	73	67	73	72	69	44	72	72	69	72	82	83	15	79	66	89	No.Diff.Exp	transmembrane	kidins220b	kinase D-interacting substrate 220b [Source:ZFIN;Acc:ZDB-GENE-030131-7824]
ENSDARG00000017397	0	37	64	64	63	65	41	69	68	69	69	63	74	58	70	72	70	No.Diff.Exp	non-transmembrane	smarcc1a	SWI/SNF related, matrix associated, actin dependent regulator of chromatin, subfamily c, member 1a [Source:ZFIN;Acc:ZDB-GENE-080514-3]
ENSDARG00000017423	0	43	27	45	41	37	36	47	47	47	47	62	74	52	61	14	79	No.Diff.Exp	non-transmembrane	patl1	protein associated with topoisomerase II homolog 1 (yeast) [Source:ZFIN;Acc:ZDB-GENE-070209-83]
ENSDARG00000017445	15	78	84	85	86	78	77	84	67	63.5	84	92	93	93	92	92	91	No.Diff.Exp	non-transmembrane	eif3i	eukaryotic translation initiation factor 3, subunit I [Source:ZFIN;Acc:ZDB-GENE-040426-1922]
ENSDARG00000017500	18	78	0	73	0	0	0	0	0	0	0	73.5	82	78	81	81	89	No.Diff.Exp	non-transmembrane	rock2a	rho-associated, coiled-coil containing protein kinase 2a [Source:ZFIN;Acc:ZDB-GENE-030115-3]
ENSDARG00000017522	29	52	59	59	56	51	0	58	58	56	59	65	68	54	63	60	63	No.Diff.Exp	non-transmembrane	ctdp1	CTD (carboxy-terminal domain, RNA polymerase II, polypeptide A) phosphatase, subunit 1 [Source:ZFIN;Acc:ZDB-GENE-040720-1]
ENSDARG00000017525	49	59	54	56	31	40	0	54	44.5	54	54	76	78	74	74	69	69	No.Diff.Exp	non-transmembrane	ccnt1	cyclin T1 [Source:ZFIN;Acc:ZDB-GENE-030131-6397]
ENSDARG00000017565	8	58	52	56	56	55	52	58	58	59	59	67	52	55	65	58	10.6667	No.Diff.Exp	non-transmembrane	itk	IL2-inducible T-cell kinase [Source:ZFIN;Acc:ZDB-GENE-990415-261]
ENSDARG00000017653	0	42	39	45	43	43	25	40	41	43	43	60	60	50	55	52	54	No.Diff.Exp	non-transmembrane	rgs13	regulator of G-protein signaling 13 [Source:ZFIN;Acc:ZDB-GENE-070410-138]
ENSDARG00000017659	0	0	0	0	0	0	0	0	0	0	0	0	0	0	0	0	91	No.Diff.Exp	non-transmembrane	sps2	selenophosphate synthetase 2 [Source:ZFIN;Acc:ZDB-GENE-030327-5]
ENSDARG00000017687	41	42	49	0	0	0	0	0	0	0	0	56	57	50	61	52	65	No.Diff.Exp	non-transmembrane	dnajc5gb	DnaJ (Hsp40) homolog, subfamily C, member 5 gamma b [Source:ZFIN;Acc:ZDB-GENE-040426-1238]
ENSDARG00000017703	63	38.5	75	76	72	66	59	74	74	75	75	77	79	75	79	55.5	74	No.Diff.Exp	transmembrane	paqr3a	progestin and adipoQ receptor family member IIIa [Source:ZFIN;Acc:ZDB-GENE-040426-1667]
ENSDARG00000017741	30	59	72	70	71	61	0	66	61	67	67	76	77	70	19	71	86	No.Diff.Exp	non-transmembrane	g3bp1	GTPase activating protein (SH3 domain) binding protein 1 [Source:ZFIN;Acc:ZDB-GENE-030131-7452]
ENSDARG00000017748	0	53	50	53	55	36	38	40	40	41	41	60	62	57	60	59	61	No.Diff.Exp	non-transmembrane	arhgap29b	Rho GTPase activating protein 29b [Source:ZFIN;Acc:ZDB-GENE-031010-44]
ENSDARG00000017757	43	73	73	71	73	69	52	71	72	72	72	80	81	75	50	79	87	No.Diff.Exp	non-transmembrane	pik3cg	phosphatidylinositol-4,5-bisphosphate 3-kinase, catalytic subunit gamma [Source:ZFIN;Acc:ZDB-GENE-040426-2532]
ENSDARG00000017772	42	81	71	79	81	79	31	80	80	79	78	86	87	86	87	87	93	No.Diff.Exp	transmembrane	mdh1aa	malate dehydrogenase 1Aa, NAD (soluble) [Source:ZFIN;Acc:ZDB-GENE-040204-1]
ENSDARG00000017775	0	78	81	69.5	79	78	63	76	76	77	77	82	81	69	83	75	0	No.Diff.Exp	transmembrane	atp5g3a	ATP synthase, H+ transporting, mitochondrial Fo complex, subunit C3 (subunit 9), genome duplicate a [Source:ZFIN;Acc:ZDB-GENE-040426-857]
ENSDARG00000017781	45	83	80	48	40	73	75	73	72	75	75	87	89	87	90	86	87	No.Diff.Exp	non-transmembrane	hsd17b10	hydroxysteroid (17-beta) dehydrogenase 10 [Source:ZFIN;Acc:ZDB-GENE-041010-201]
ENSDARG00000017803	0	92	85	90	91	94	47	94	91	93	94	95	95	90	92	96	97	No.Diff.Exp	non-transmembrane	gsk3b	glycogen synthase kinase 3 beta [Source:ZFIN;Acc:ZDB-GENE-990714-4]
ENSDARG00000017841	82	94	92	94	92	94	67	94	94	94	94	92	92	82	91	84	99	No.Diff.Exp	non-transmembrane	cand1	cullin-associated and neddylation-dissociated 1 [Source:ZFIN;Acc:ZDB-GENE-040426-2872]
ENSDARG00000017843	0	91	90	93	57	67	47	92	92	92	92	65	87	74	0	0	92	No.Diff.Exp	non-transmembrane	srsf1b	serine/arginine-rich splicing factor 1b [Source:ZFIN;Acc:ZDB-GENE-040426-1467]
ENSDARG00000017844	64	77	84	80	0	82	68	82	82	81	81	85	86	84	86	60	0	No.Diff.Exp	non-transmembrane	copz1	coatomer protein complex, subunit zeta 1 [Source:ZFIN;Acc:ZDB-GENE-000406-6]
ENSDARG00000017886	0	51	49	51	45	51	38	51	51	51	51	63	64	55	61	58	71	No.Diff.Exp	non-transmembrane	zbtb11	zinc finger and BTB domain containing 11 [Source:ZFIN;Acc:ZDB-GENE-030131-5055]
ENSDARG00000017891	0	89	0	86	88	64	72	85	86	86	86	94	94	93	92	92	96	No.Diff.Exp	non-transmembrane	tcp1	t-complex 1 [Source:ZFIN;Acc:ZDB-GENE-990714-24]
ENSDARG00000017905	0	59	55	0	55	21	45.6667	54	56	55	55	71	73	68	70	67	78	No.Diff.Exp	non-transmembrane	casp3a	caspase 3, apoptosis-related cysteine peptidase a [Source:ZFIN;Acc:ZDB-GENE-011210-1]
ENSDARG00000017929	26	34	56	55	21	54	54	55	56	56	56	49	61	15	60	58	67	No.Diff.Exp	non-transmembrane	ncoa2	nuclear receptor coactivator 2 [Source:ZFIN;Acc:ZDB-GENE-010406-3]
ENSDARG00000017984	0	0	0	0	0	0	0	0	0	0	0	16	21.4	11.8333	9	18	30.3333	No.Diff.Exp	transmembrane	zgc:172106	zgc:172106 [Source:ZFIN;Acc:ZDB-GENE-080204-42]
ENSDARG00000018049	26	71	61	59	0	71	56	71	70	71	71	75	75	67	73	72	77	No.Diff.Exp	non-transmembrane	sf3b2	splicing factor 3b, subunit 2 [Source:ZFIN;Acc:ZDB-GENE-070928-1]
ENSDARG00000018060	42	0	54	24.5	68	57	52	61	61	61	61	33.3333	37	63	36	35	0	No.Diff.Exp	non-transmembrane	pik3r2	phosphoinositide-3-kinase, regulatory subunit 2 (beta) [Source:ZFIN;Acc:ZDB-GENE-040309-1]
ENSDARG00000018061	0	45	43	0	34	44	42	45	45	43	43	50	53	47	47	45	56	No.Diff.Exp	non-transmembrane	neil1	nei-like DNA glycosylase 1 [Source:ZFIN;Acc:ZDB-GENE-040426-994]
ENSDARG00000018145	0	48	36	0	0	0	0	0	0	0	0	73	68	0	0	73	75	No.Diff.Exp	non-transmembrane	mid1ip1l	MID1 interacting protein 1, like [Source:ZFIN;Acc:ZDB-GENE-030131-1697]
ENSDARG00000018146	68.5	78	64	72	58	66	65	68	68	68	68	78	79	0	80	0	82	No.Diff.Exp	non-transmembrane	gpx1a	glutathione peroxidase 1a [Source:ZFIN;Acc:ZDB-GENE-030410-1]
ENSDARG00000018174	0	87	80	77	83	86	71	87	87	87	87	89	78	86	88	89	87	No.Diff.Exp	non-transmembrane	gnai2a	guanine nucleotide binding protein (G protein), alpha inhibiting activity polypeptide 2a [Source:ZFIN;Acc:ZDB-GENE-030131-8365]
ENSDARG00000018192	37	89	87	77	88	74	56	88	75	75	89	85	95	93	42	89	89	No.Diff.Exp	non-transmembrane	ubr5	ubiquitin protein ligase E3 component n-recognin 5 [Source:ZFIN;Acc:ZDB-GENE-030131-6559]
ENSDARG00000018241	0	82	80	83	81	82	44	82	0	83	83	88	90	91	87	84	94	No.Diff.Exp	non-transmembrane	mfap1	microfibrillar-associated protein 1 [Source:ZFIN;Acc:ZDB-GENE-040426-1075]
ENSDARG00000018260	17	64	60	65	60	65	59	65	65	65	65	60	63	62	63	62	59	No.Diff.Exp	transmembrane	bmp7a	bone morphogenetic protein 7a [Source:ZFIN;Acc:ZDB-GENE-000208-25]
ENSDARG00000018272	50	61	56	61	62	58	46	62	62	63	63	53	57	57	45	31.5	47	No.Diff.Exp	transmembrane	wdr33	WD repeat domain 33 [Source:ZFIN;Acc:ZDB-GENE-040924-3]
ENSDARG00000018283	0	65	66	59	62	60	50	60	59	58	58	0	84	75	78	79	82	No.Diff.Exp	transmembrane	cyba	cytochrome b-245, alpha polypeptide [Source:ZFIN;Acc:ZDB-GENE-040426-1526]
ENSDARG00000018296	0	49	46	48	49	49	34	47	47	49	49	35	56	48	50	50	65	dre_Myel	non-transmembrane	rev1	REV1, polymerase (DNA directed) [Source:ZFIN;Acc:ZDB-GENE-081105-180]
ENSDARG00000018319	0	87	85	86	87	43	63	86	86	86	86	90	91	60	0	0	0	No.Diff.Exp	non-transmembrane	arglu1b	arginine and glutamate rich 1b [Source:ZFIN;Acc:ZDB-GENE-040426-736]
ENSDARG00000018334	0	93	92	90	80	0	70	88.5	76.75	93	93	93	91	89	92	87	60	No.Diff.Exp	non-transmembrane	rpl35	ribosomal protein L35 [Source:ZFIN;Acc:ZDB-GENE-020419-2]
ENSDARG00000018382	0	63	62	53	65	59	55	63	63	64	64	77	78	69	75	74	68	No.Diff.Exp	non-transmembrane	prkcha	protein kinase C, eta, a [Source:ZFIN;Acc:ZDB-GENE-080402-5]
ENSDARG00000018425	76	82	0	0	0	0	0	0	0	0	0	84	83.5	68.5	82	83	84	No.Diff.Exp	non-transmembrane	si:ch211-175g6.7	si:ch211-175g6.7 [Source:ZFIN;Acc:ZDB-GENE-030131-6611]
ENSDARG00000018432	0	50	36	46	48	46	49	49	50	49	49	58	58	54	51	24	58	No.Diff.Exp	transmembrane	m6pr	mannose-6-phosphate receptor (cation dependent) [Source:ZFIN;Acc:ZDB-GENE-040426-2285]
ENSDARG00000018524	0	63	56	39	0	41	51	56	56	0	56	71	71	42	70	58	77	No.Diff.Exp	non-transmembrane	midn	midnolin [Source:ZFIN;Acc:ZDB-GENE-030131-2433]
ENSDARG00000018559	23	53	52	50	54	54	43	54	47	55	55	62	62	54	62	40	69	dre_NK	non-transmembrane	kdm7ab	lysine (K)-specific demethylase 7Ab [Source:ZFIN;Acc:ZDB-GENE-050309-32]
ENSDARG00000018562	61	74	78	0	80	78	68	79	78	78	78	84	83	84	83	75	91	No.Diff.Exp	non-transmembrane	cope	coatomer protein complex, subunit epsilon [Source:ZFIN;Acc:ZDB-GENE-041114-59]
ENSDARG00000018569	0	12	23	18	23	16	13	23	24	14	23	28	29	20	28	26	35	No.Diff.Exp	transmembrane	tnfrsf1a	tumor necrosis factor receptor superfamily, member 1a [Source:ZFIN;Acc:ZDB-GENE-040426-2252]
ENSDARG00000018587	0	0	0	24.8889	22.6667	23	23.375	23.5	24.1429	24.4286	24.75	40	34	0	32	0	50.6667	No.Diff.Exp	non-transmembrane	zgc:152658	zgc:152658 [Source:ZFIN;Acc:ZDB-GENE-060929-68]
ENSDARG00000018593	51	62	55	52	42	48	58	58	58	58	58	78	79	77	77	78	86	No.Diff.Exp	transmembrane	parp16	poly (ADP-ribose) polymerase family, member 16 [Source:ZFIN;Acc:ZDB-GENE-040426-2289]
ENSDARG00000018602	75.6667	0	0	0	0	0	0	0	0	0	0	95	96	93	0	94	69	No.Diff.Exp	non-transmembrane	rab5aa	RAB5A, member RAS oncogene family, a [Source:ZFIN;Acc:ZDB-GENE-030131-139]
ENSDARG00000018618	63	81	74	79	82	78	75	83	83	82	82	46	88	54	86	86	89	No.Diff.Exp	non-transmembrane	cpsf6	cleavage and polyadenylation specific factor 6 [Source:ZFIN;Acc:ZDB-GENE-030131-5277]
ENSDARG00000018637	87	0	97	100	100	100	96	100	89.3333	100	100	100	97	98	96	96	96	No.Diff.Exp	transmembrane	sec61g	Sec61 translocon gamma subunit [Source:ZFIN;Acc:ZDB-GENE-040718-203]
ENSDARG00000018653	0	66	71	18	70	49	43.5	71	71	71	71	69	66	58	65	67	82	No.Diff.Exp	non-transmembrane	acot7	acyl-CoA thioesterase 7 [Source:ZFIN;Acc:ZDB-GENE-040912-42]
ENSDARG00000018658	0	61	54	58	24	51	0	60	60	53	61	77	76	77	75	75	81	No.Diff.Exp	non-transmembrane	aar2	AAR2 splicing factor homolog (S. cerevisiae) [Source:ZFIN;Acc:ZDB-GENE-040704-68]
ENSDARG00000018840	55	78	72	75	78	73	60	73	74	73	73	89	90	86	89	89	0	No.Diff.Exp	non-transmembrane	trpc4apa	transient receptor potential cation channel, subfamily C, member 4 associated protein a [Source:ZFIN;Acc:ZDB-GENE-000330-3]
ENSDARG00000018854	0	0	0	0	0	0	0	0	0	0	0	36	33	21	32	21	34	No.Diff.Exp	non-transmembrane	scaf4b	SR-related CTD-associated factor 4b [Source:ZFIN;Acc:ZDB-GENE-050506-42]
ENSDARG00000018890	0	84	69	66	0	66	74	77.5	82	82	82	83	88	85	85	85	91	No.Diff.Exp	non-transmembrane	snrpa	small nuclear ribonucleoprotein polypeptide A [Source:ZFIN;Acc:ZDB-GENE-030131-2841]
ENSDARG00000018898	0	64	64	63	63	64	58	64	65	0	64	71	71	65	71	69	0	No.Diff.Exp	non-transmembrane	zfand5a	zinc finger, AN1-type domain 5a [Source:ZFIN;Acc:ZDB-GENE-040426-1979]
ENSDARG00000018902	28	76	64	71	69	68	69	71	72	74	74	82	84	79	77	64	55	No.Diff.Exp	non-transmembrane	pes	pescadillo [Source:ZFIN;Acc:ZDB-GENE-990415-206]
ENSDARG00000018904	74	86	64	88	87	84	65	86	74	86	86	89	90	88	89	88	82	No.Diff.Exp	non-transmembrane	cstf3	cleavage stimulation factor, 3' pre-RNA, subunit 3 [Source:ZFIN;Acc:ZDB-GENE-040426-1997]
ENSDARG00000018907	0	37	0	51	52	47	47	52	52	53	53	70	63	46	71	66	62	No.Diff.Exp	non-transmembrane	kat6a	K(lysine) acetyltransferase 6A [Source:ZFIN;Acc:ZDB-GENE-021022-3]
ENSDARG00000018914	0	70	53	70	70	70	68	70.5	70.5	0	71	75	76	75	72	73	85	No.Diff.Exp	non-transmembrane	hnrnpk	heterogeneous nuclear ribonucleoprotein K [Source:ZFIN;Acc:ZDB-GENE-040426-1926]
ENSDARG00000018956	0	58	54	77	80	70	76	74	71	75	75	90	91	90	90	89	90	No.Diff.Exp	transmembrane	tmem39b	transmembrane protein 39B [Source:ZFIN;Acc:ZDB-GENE-030131-6042]
ENSDARG00000018958	0	69	70	0	71	0	70	69	69	69	69	71	71	71	71	70	69	No.Diff.Exp	non-transmembrane	nrarpb	notch-regulated ankyrin repeat protein b [Source:ZFIN;Acc:ZDB-GENE-030515-7]
ENSDARG00000018961	78	85	74	83	84	77	49	82	82	76	83	86	88	85	85	88	91	No.Diff.Exp	non-transmembrane	gtpbp4	GTP binding protein 4 [Source:ZFIN;Acc:ZDB-GENE-030131-5982]
ENSDARG00000018971	0	60	58	56	58	0	54	55	56	53	56	60	61	55	59	29	76	No.Diff.Exp	transmembrane	b3gnt5a	UDP-GlcNAc:betaGal beta-1,3-N-acetylglucosaminyltransferase 5a [Source:ZFIN;Acc:ZDB-GENE-030131-8470]
ENSDARG00000019000	0	92	94	94	95	95	63	95	95	95	95	98	98	90	97	97	99	No.Diff.Exp	non-transmembrane	smc3	structural maintenance of chromosomes 3 [Source:ZFIN;Acc:ZDB-GENE-030131-3196]
ENSDARG00000019008	0	71	66	78	81	78	55	76	76	77	77	83	84	81	80	82	69	No.Diff.Exp	non-transmembrane	erp44	endoplasmic reticulum protein 44 [Source:ZFIN;Acc:ZDB-GENE-040426-1902]
ENSDARG00000019033	0	59	47	54	57	41	54	56	55	56	56	68	68	50	64	64	65	No.Diff.Exp	transmembrane	tmem59	transmembrane protein 59 [Source:ZFIN;Acc:ZDB-GENE-070912-397]
ENSDARG00000019060	30	49	51	51	49	31	34	51	51	40	51	51	50	51	47	47	55	No.Diff.Exp	non-transmembrane	snx12	sorting nexin 12 [Source:ZFIN;Acc:ZDB-GENE-040426-787]
ENSDARG00000019062	0	78	81	69	59	79	0	77	80	80	79	92	94	94	91	90	97	No.Diff.Exp	non-transmembrane	arpc5b	actin related protein 2/3 complex, subunit 5B [Source:ZFIN;Acc:ZDB-GENE-040120-7]
ENSDARG00000019098	32	62	58	48.5	56	54	41	52	54	53	53	51	58	59	63	57.5	70	No.Diff.Exp	transmembrane	cd82a	CD82 molecule a [Source:ZFIN;Acc:ZDB-GENE-030131-2818]
ENSDARG00000019113	78	84	90	85	86	86	77	88	87	85	85	64	97	44	97	95	84	No.Diff.Exp	non-transmembrane	mob3a	MOB kinase activator 3A [Source:ZFIN;Acc:ZDB-GENE-030131-4091]
ENSDARG00000019128	45	0	0	0	0	0	0	0	0	0	0	77	81	57	56	52	0	dre_Myel	non-transmembrane	tpm4b	tropomyosin 4b [Source:ZFIN;Acc:ZDB-GENE-030131-2964]
ENSDARG00000019137	51	78	72	72	71	58.5	66	61.5	54	72	65	82	85	35	83	85	83	No.Diff.Exp	transmembrane	tram1	translocation associated membrane protein 1 [Source:ZFIN;Acc:ZDB-GENE-021011-1]
ENSDARG00000019181	58	88	88	72	88	87	73	88	88	88	88	90.5	90	88	89	0	93	No.Diff.Exp	non-transmembrane	rpsa	ribosomal protein SA [Source:ZFIN;Acc:ZDB-GENE-040426-811]
ENSDARG00000019188	66	56	84	0	0	0	0	0	44	0	0	88	85	72	84	84	0	No.Diff.Exp	non-transmembrane	ube2l3a	ubiquitin-conjugating enzyme E2L 3a [Source:ZFIN;Acc:ZDB-GENE-030131-2977]
ENSDARG00000019191	0	20	30	30	31	27	18	22	27	26	26	38	0	32	32	0	29	No.Diff.Exp	non-transmembrane	2012-09-01	septin 12 [Source:ZFIN;Acc:ZDB-GENE-120215-68]
ENSDARG00000019205	39	63	62	50	0	61	0	61	0	43	61	81	82	75	35	75	73	No.Diff.Exp	non-transmembrane	fam120c	family with sequence similarity 120C [Source:ZFIN;Acc:ZDB-GENE-090313-228]
ENSDARG00000019207	30	37	38.2727	0	48	48	0	45.5	45.5	46	46.5	49	56	46	38	31	31	No.Diff.Exp	transmembrane	abo	ABO blood group (transferase A, alpha 1-3-N-acetylgalactosaminyltransferase; transferase B, alpha 1-3-galactosyltransferase) [Source:ZFIN;Acc:ZDB-GENE-081104-23]
ENSDARG00000019223	0	82	80	80	81	42	57	82	82	82	82	83	84	55	0	0	88	No.Diff.Exp	non-transmembrane	arglu1a	arginine and glutamate rich 1a [Source:ZFIN;Acc:ZDB-GENE-040426-2914]
ENSDARG00000019230	0	91	92	14	92	58	94	86.1667	77.6471	92	92	95	94	92	94	94	94	No.Diff.Exp	non-transmembrane	rpl7a	ribosomal protein L7a [Source:ZFIN;Acc:ZDB-GENE-031001-9]
ENSDARG00000019231	0	89	86	47	88	82	70	89	89	88	88	92	93	92	52	90	96	No.Diff.Exp	non-transmembrane	spna2	spectrin alpha 2 [Source:ZFIN;Acc:ZDB-GENE-051113-60]
ENSDARG00000019239	89	96	96	56	96	85	61	97	97	97	97	0	0	38	0	0	0	No.Diff.Exp	non-transmembrane	cul1a	cullin 1a [Source:ZFIN;Acc:ZDB-GENE-030131-2603]
ENSDARG00000019332	32	43	41	13	0	35	0	37	37	38	38	38	36	31	0	0	46	No.Diff.Exp	transmembrane	C24H11orf65	chromosome 11 open reading frame 65 [Source:HGNC Symbol;Acc:HGNC:28519]
ENSDARG00000019345	53	76	75	76	75	70	61	75	74	75	75	48	67	66	67.5	70	81	No.Diff.Exp	non-transmembrane	mark3a	MAP/microtubule affinity-regulating kinase 3a [Source:ZFIN;Acc:ZDB-GENE-030131-6232]
ENSDARG00000019360	30	85	86	86	87	79	62	85	85	84	85	92	93	87	90	90	92	No.Diff.Exp	non-transmembrane	sec23b	Sec23 homolog B (S. cerevisiae) [Source:ZFIN;Acc:ZDB-GENE-030131-5479]
ENSDARG00000019362	26	78	69	26	76	76	74	77	66.5	77	77	87	86	82	84	32	91	No.Diff.Exp	non-transmembrane	ptbp1a	polypyrimidine tract binding protein 1a [Source:ZFIN;Acc:ZDB-GENE-050522-492]
ENSDARG00000019392	53	82	79	79	78	79	76	76	78.5	75.5	78.5	93	94	85	94	93	80	No.Diff.Exp	non-transmembrane	stat5a	signal transducer and activator of transcription 5a [Source:ZFIN;Acc:ZDB-GENE-030820-2]
ENSDARG00000019404	60	70	71	61	31	71	46	72	71	71	71	86	82	77	83	84	84	No.Diff.Exp	non-transmembrane	atp5d	ATP synthase, H+ transporting, mitochondrial F1 complex, delta subunit [Source:ZFIN;Acc:ZDB-GENE-030131-7649]
ENSDARG00000019417	0	72	70	69	65	44	67	66	67	67	66	79	77	77	76	76	79	No.Diff.Exp	non-transmembrane	gadd45ga	growth arrest and DNA-damage-inducible, gamma a [Source:ZFIN;Acc:ZDB-GENE-040426-1882]
ENSDARG00000019420	0	65	0	72	73	54	52	73	73	72	72	78	80	78	79	79	59	No.Diff.Exp	non-transmembrane	etnk1	ethanolamine kinase 1 [Source:ZFIN;Acc:ZDB-GENE-030328-21]
ENSDARG00000019438	16	77	68	75	77	69	52	74	75	76	76	82	83	84	84	41.5	85	No.Diff.Exp	transmembrane	rnf13	ring finger protein 13 [Source:ZFIN;Acc:ZDB-GENE-040426-772]
ENSDARG00000019444	0	72	74	76	0	0	0	70	70	70	70	76	79	81	76	77	81	No.Diff.Exp	transmembrane	ssr4	signal sequence receptor, delta [Source:ZFIN;Acc:ZDB-GENE-030131-4900]
ENSDARG00000019459	21	50	46	48	49	37	44	50	50	50	50	44.5	44	30	38.5	38	69	No.Diff.Exp	non-transmembrane	elf2a	E74-like factor 2a (ets domain transcription factor) [Source:ZFIN;Acc:ZDB-GENE-040822-41]
ENSDARG00000019487	24	49	46	49	17	48	26	45	45	49	49	53	55	51	55	52	59	No.Diff.Exp	transmembrane	tmx1	thioredoxin-related transmembrane protein 1 [Source:ZFIN;Acc:ZDB-GENE-030131-2327]
ENSDARG00000019496	73	85	80	79	81	81	80	79	59	80	80	89	88	83	25	73.5	94	No.Diff.Exp	non-transmembrane	esd	esterase D/formylglutathione hydrolase [Source:ZFIN;Acc:ZDB-GENE-050417-328]
ENSDARG00000019572	0	76	59	62	75	69	0	67	68	70	70	86	86	83	81	83	70	No.Diff.Exp	non-transmembrane	taf7	TAF7 RNA polymerase II, TATA box binding protein (TBP)-associated factor [Source:ZFIN;Acc:ZDB-GENE-020419-18]
ENSDARG00000019579	29	46	56	73	58	65	47	73	72	73	73	78	61	58	78	68	51	No.Diff.Exp	non-transmembrane	ldb2a	LIM domain binding 2a [Source:ZFIN;Acc:ZDB-GENE-990415-136]
ENSDARG00000019581	16	75	68	75	74	52	55	74	74	71	75	78	82	80	82	79	0	No.Diff.Exp	non-transmembrane	uso1	USO1 vesicle transport factor [Source:ZFIN;Acc:ZDB-GENE-040426-688]
ENSDARG00000019644	74	78	78	78	77	76	63	79	79	80	80	86	86	62	84	85	90	No.Diff.Exp	non-transmembrane	ldhba	lactate dehydrogenase Ba [Source:ZFIN;Acc:ZDB-GENE-991026-6]
ENSDARG00000019702	70	0	0	0	0	0	0	0	0	0	0	91	92	89	89	89	93	No.Diff.Exp	non-transmembrane	aldocb	aldolase C, fructose-bisphosphate, b [Source:ZFIN;Acc:ZDB-GENE-030821-1]
ENSDARG00000019713	0	40	0	0	0	0	0	0	0	0	0	64	67	48	53	62	70	No.Diff.Exp	transmembrane	oatx	organic anion transporter X [Source:ZFIN;Acc:ZDB-GENE-070115-1]
ENSDARG00000019717	0	22.5	67	67	0	66	68	68	68	68	68	81	83	78	80	80	85	No.Diff.Exp	non-transmembrane	pbx2	pre-B-cell leukemia homeobox 2 [Source:ZFIN;Acc:ZDB-GENE-000405-5]
ENSDARG00000019732	31	73	71	69	72	61	47	68	62	64	68	77	84	80	82	84	0	No.Diff.Exp	non-transmembrane	mtch2	mitochondrial carrier homolog 2 [Source:ZFIN;Acc:ZDB-GENE-991008-9]
ENSDARG00000019765	37	31	0	0	0	0	0	0	0	0	0	73	77	65	75	48	20	No.Diff.Exp	non-transmembrane	C1H7orf55	C7orf55-LUC7L2 readthrough [Source:HGNC Symbol;Acc:HGNC:44671]
ENSDARG00000019778	93	94	95	92	96	94	0	95	69	95	95	97	96	94	94	94	94	No.Diff.Exp	non-transmembrane	rps6	ribosomal protein S6 [Source:ZFIN;Acc:ZDB-GENE-040801-8]
ENSDARG00000019797	0	69	67	69	68	68	69	68	68	68	68	74	75	68	72	71	91	No.Diff.Exp	non-transmembrane	qrich1	glutamine-rich 1 [Source:ZFIN;Acc:ZDB-GENE-030131-8204]
ENSDARG00000019845	49	71	70	69	70	37	62	71	71	62	70	73	61	75	66	66	81	dre_NK	non-transmembrane	pdlim1	PDZ and LIM domain 1 (elfin) [Source:ZFIN;Acc:ZDB-GENE-030131-5227]
ENSDARG00000019881	0	55	42	0	47	28	14	44	44	32	42	37	58	55	61	60	64	No.Diff.Exp	transmembrane	bsg	basigin [Source:ZFIN;Acc:ZDB-GENE-030131-9638]
ENSDARG00000020008	21	88	92	97	97	95	90	97	97	97	97	98	98	91	0	98	99	No.Diff.Exp	non-transmembrane	vcp	valosin containing protein [Source:ZFIN;Acc:ZDB-GENE-030131-5408]
ENSDARG00000020009	25	49	47	52	50	38	32	56	50	54	54	42	60	22	59	18	53	No.Diff.Exp	non-transmembrane	bmp2k	BMP2 inducible kinase [Source:ZFIN;Acc:ZDB-GENE-041212-72]
ENSDARG00000020015	59	75	74	72	71	38	0	68	66	61	61	50	0	79	75	0	86	No.Diff.Exp	non-transmembrane	mrps33	mitochondrial ribosomal protein S33 [Source:ZFIN;Acc:ZDB-GENE-040715-6]
ENSDARG00000020043	0	47	77	83	83	84	75	84	84	84	84	96	96	88	90	96	99	No.Diff.Exp	non-transmembrane	cnot8	CCR4-NOT transcription complex, subunit 8 [Source:ZFIN;Acc:ZDB-GENE-040426-2845]
ENSDARG00000020101	93	98	99	99	99	99	62	99	99	99	99	98	98	98	98	97	38	No.Diff.Exp	non-transmembrane	psmc2	proteasome (prosome, macropain) 26S subunit, ATPase 2 [Source:ZFIN;Acc:ZDB-GENE-040426-1327]
ENSDARG00000020187	64	49	64	64	0	59	30	68	68	63	63	77	75	74	73	76	78	No.Diff.Exp	non-transmembrane	GCA	grancalcin, EF-hand calcium binding protein [Source:HGNC Symbol;Acc:HGNC:15990]
ENSDARG00000020197	49	85	85	66	84	84	76	84	83.5	85	85	87	88.5	86.5	87.5	88	89	No.Diff.Exp	non-transmembrane	rpl5a	ribosomal protein L5a [Source:ZFIN;Acc:ZDB-GENE-030131-5161]
ENSDARG00000020228	0	67	43.5	69	0	0	0	70	70	50	70	74	78	61	71	73	90	No.Diff.Exp	non-transmembrane	usf2	upstream transcription factor 2, c-fos interacting [Source:ZFIN;Acc:ZDB-GENE-030131-8475]
ENSDARG00000020232	45	49	52	92	90	90	80	90	90	91	91	96	96	94	94	95	97	No.Diff.Exp	non-transmembrane	eif6	eukaryotic translation initiation factor 6 [Source:ZFIN;Acc:ZDB-GENE-031118-110]
ENSDARG00000020261	86.6667	96	95	98	98	92	86	98	95	98	98	97	97	67	98	96	92	No.Diff.Exp	non-transmembrane	rab2a	RAB2A, member RAS oncogene family [Source:ZFIN;Acc:ZDB-GENE-011212-2]
ENSDARG00000020278	0	75	0	0	0	0	0	0	0	0	0	83	84	49	80	80	86	No.Diff.Exp	transmembrane	si:dkeyp-120h9.1	si:dkeyp-120h9.1 [Source:ZFIN;Acc:ZDB-GENE-070705-534]
ENSDARG00000020298	0	61	51	61	61	48	0	57	58	58	58	0	0	0	0	0	82	No.Diff.Exp	non-transmembrane	btg2	B-cell translocation gene 2 [Source:ZFIN;Acc:ZDB-GENE-000210-15]
ENSDARG00000020345	39	66	0	40	78	70	47	66	75	75	65	49	81	38	82	81	79	No.Diff.Exp	non-transmembrane	clasp2	cytoplasmic linker associated protein 2 [Source:ZFIN;Acc:ZDB-GENE-040426-2343]
ENSDARG00000020377	63	83	79	83	83	73	60	82	82	83	83	74	78	53	72	72	86	No.Diff.Exp	non-transmembrane	eif4g2a	eukaryotic translation initiation factor 4, gamma 2a [Source:ZFIN;Acc:ZDB-GENE-030131-2173]
ENSDARG00000020443	35	57	78	56	56	69	0	78	77	0	78	0	0	0	0	0	87	No.Diff.Exp	transmembrane	xkr6a	XK, Kell blood group complex subunit-related family, member 6a [Source:ZFIN;Acc:ZDB-GENE-131121-106]
ENSDARG00000020465	0	49	45	48	48	49	35.3333	49	49	49	49	64	63	60	0	56	63	No.Diff.Exp	non-transmembrane	ewsr1b	EWS RNA-binding protein 1b [Source:ZFIN;Acc:ZDB-GENE-030131-1600]
ENSDARG00000020467	29	49	42	34.5	46.5	39.5	42	42.5	39.5	46	46.5	51	55	50	56	32.5	61	No.Diff.Exp	non-transmembrane	safb	scaffold attachment factor B [Source:ZFIN;Acc:ZDB-GENE-030131-698]
ENSDARG00000020469	41	71	80	80	80	79	51	79	79	79	79	85	83	76	78	82	87	No.Diff.Exp	transmembrane	map3k7	mitogen-activated protein kinase kinase kinase 7 [Source:ZFIN;Acc:ZDB-GENE-041001-135]
ENSDARG00000020482	30	63	67	69	68	66	63	67	67	66	66	64	71	0	71	0	80	No.Diff.Exp	non-transmembrane	nono	non-POU domain containing, octamer-binding [Source:ZFIN;Acc:ZDB-GENE-030131-713]
ENSDARG00000020497	0	97	96	98	98	98	62	98	97	98	98	98	100	100	100	100	100	No.Diff.Exp	non-transmembrane	rab7	RAB7, member RAS oncogene family [Source:ZFIN;Acc:ZDB-GENE-040426-1352]
ENSDARG00000020504	0	97	0	0	0	100	0	0	0	0	0	0	0	100	0	0	0	No.Diff.Exp	non-transmembrane	h3f3a	H3 histone, family 3A [Source:ZFIN;Acc:ZDB-GENE-040426-1928]
ENSDARG00000020521	22.5	89	81	83	77	83	65	84	84	83	85	92	92	75	89	44	91	No.Diff.Exp	non-transmembrane	exoc6	exocyst complex component 6 [Source:ZFIN;Acc:ZDB-GENE-040426-2511]
ENSDARG00000020527	41	49	47	49	48	39	24	36	36	33	33	51	53	48	52	51	65	No.Diff.Exp	non-transmembrane	nup62l	nucleoporin 62 like [Source:ZFIN;Acc:ZDB-GENE-030131-8491]
ENSDARG00000020573	51	61	63	64	63	61	57	62	61.6667	62	62.5	68	68	56	66	44	80	No.Diff.Exp	non-transmembrane	ddx3a	DEAD (Asp-Glu-Ala-Asp) box helicase 3a [Source:ZFIN;Acc:ZDB-GENE-030131-1565]
ENSDARG00000020581	45	78	78	29.5	80	73	72	77	77	0	77	78	84	77	82	76	90	dre_Myel	transmembrane	otofb	otoferlin b [Source:ZFIN;Acc:ZDB-GENE-110406-5]
ENSDARG00000020607	83	89	92	89	78	72	58	89	89	90	90	95	97	95	98	97	98	No.Diff.Exp	transmembrane	emc3	ER membrane protein complex subunit 3 [Source:ZFIN;Acc:ZDB-GENE-040426-2904]
ENSDARG00000020618	0	72	65	74	73	61	56	73	73	52	72	0	0	57	0	0	79	No.Diff.Exp	non-transmembrane	C9H21orf33	chromosome 21 open reading frame 33 [Source:HGNC Symbol;Acc:HGNC:1273]
ENSDARG00000020623	32	47	52	43	0	39	0	47	48	37	39	72	36	63	0	0	34	No.Diff.Exp	transmembrane	baxa	bcl2-associated X protein, a [Source:ZFIN;Acc:ZDB-GENE-000511-6]
ENSDARG00000020625	2	37	63	63	64	57	57	62	62	63	63	69	72	69	70	70	83	No.Diff.Exp	non-transmembrane	jak1	Janus kinase 1 [Source:ZFIN;Acc:ZDB-GENE-980526-142]
ENSDARG00000020693	0	63	65	72	67	61	74	73	73	74	74	72	73	81	73	72	77	dre_Myel	non-transmembrane	sesn1	sestrin 1 [Source:ZFIN;Acc:ZDB-GENE-040718-408]
ENSDARG00000020759	20	42	38	36	38	38	30	38	38	37	40	64	39	45	55	54	62	No.Diff.Exp	non-transmembrane	ef1	E74-like factor 1 (ets domain transcription factor) [Source:ZFIN;Acc:ZDB-GENE-980526-335]
ENSDARG00000020761	50	74	72	0	65	59	62	56	25	60	60	85	76	83	86	63	90	No.Diff.Exp	non-transmembrane	arrdc2	arrestin domain containing 2 [Source:ZFIN;Acc:ZDB-GENE-030131-7146]
ENSDARG00000020777	13	49	34	45	46	42	34	46	45	45	45	40	23	0	0	0	74	No.Diff.Exp	non-transmembrane	cep85l	centrosomal protein 85, like [Source:ZFIN;Acc:ZDB-GENE-041014-309]
ENSDARG00000020788	24	48	44	41	41	39	33	39	39	40	40	43	0	36	0	45	58	No.Diff.Exp	non-transmembrane	sla2	Src-like-adaptor 2 [Source:ZFIN;Acc:ZDB-GENE-080204-98]
ENSDARG00000020811	0	69	62	67	0	58	54	66	65	66	65	0	0	0	0	0	54	No.Diff.Exp	transmembrane	efemp2b	EGF containing fibulin-like extracellular matrix protein 2b [Source:ZFIN;Acc:ZDB-GENE-030219-125]
ENSDARG00000020840	0	78	73	47.5	75	74	51	75	75	75	75	82	84	83	81	78	70	No.Diff.Exp	non-transmembrane	mcrs1	microspherule protein 1 [Source:ZFIN;Acc:ZDB-GENE-040426-2434]
ENSDARG00000020850	0	0	0	0	0	0	0	0	0	0	0	86	78	91	89	88.3333	94.5	No.Diff.Exp	non-transmembrane	eef1a1l1	eukaryotic translation elongation factor 1 alpha 1, like 1 [Source:ZFIN;Acc:ZDB-GENE-990415-52]
ENSDARG00000020893	0	77	58	72	0	0	0	0	0	0	0	82	83	76	78	80	83	No.Diff.Exp	transmembrane	slc25a22	solute carrier family 25 (mitochondrial carrier: glutamate), member 22 [Source:ZFIN;Acc:ZDB-GENE-040426-2745]
ENSDARG00000020926	0	32	29	16	27	22	0	22	24	21	22	41	40	31	0	39	49	No.Diff.Exp	non-transmembrane	creb3l3l	cAMP responsive element binding protein 3-like 3 like [Source:ZFIN;Acc:ZDB-GENE-040426-2942]
ENSDARG00000020929	72	0	0	0	0	0	0	0	0	0	0	80	81	65	75	77	81	No.Diff.Exp	non-transmembrane	fam49ba	family with sequence similarity 49, member Ba [Source:ZFIN;Acc:ZDB-GENE-030131-9537]
ENSDARG00000020960	0	35	77	77	77	64	58	76	75	71	76	90	88	85	86	84	88	No.Diff.Exp	non-transmembrane	hgs	hepatocyte growth factor-regulated tyrosine kinase substrate [Source:ZFIN;Acc:ZDB-GENE-030131-6107]
ENSDARG00000020982	17	54	49	54	55	54	36	54	54	54	54	61	62	55	61	55	83	No.Diff.Exp	non-transmembrane	prickle2a	prickle homolog 2a [Source:ZFIN;Acc:ZDB-GENE-061110-112]
ENSDARG00000021021	0	28.8974	0	23.5	28	28	27	28	28	29	29	50	53	36	47	42	71	No.Diff.Exp	non-transmembrane	trim35-28	tripartite motif containing 35-28 [Source:ZFIN;Acc:ZDB-GENE-071004-19]
ENSDARG00000021059	38	72	74	72	73	73	65	74	72	74	74	78	77	72	72	71	86	No.Diff.Exp	non-transmembrane	alas1	aminolevulinate, delta-, synthase 1 [Source:ZFIN;Acc:ZDB-GENE-001229-2]
ENSDARG00000021107	0	86	84	0	86	46.5	81	87	86	86	86	86	83	85	84	84	0	No.Diff.Exp	non-transmembrane	sf3a2	splicing factor 3a, subunit 2 [Source:ZFIN;Acc:ZDB-GENE-040426-897]
ENSDARG00000021113	0	0	73	0	0	0	0	0	0	0	0	0	0	63	0	0	89	No.Diff.Exp	non-transmembrane	ptmaa	prothymosin, alpha a [Source:ZFIN;Acc:ZDB-GENE-030131-7647]
ENSDARG00000021124	72	64	73	60	62	68	66	68	60.4	68.5	68.5	76	79	75	76	77	90	No.Diff.Exp	non-transmembrane	cfl1	cofilin 1 [Source:ZFIN;Acc:ZDB-GENE-030131-215]
ENSDARG00000021154	0	35	33	0	0	40	39	40	38	42	42	68	63	62	63	65	69	No.Diff.Exp	non-transmembrane	PRODH2	proline dehydrogenase (oxidase) 2 [Source:HGNC Symbol;Acc:HGNC:17325]
ENSDARG00000021163	50.3333	60	77	67	70	75	73	74	74	71	71	75	86	71	82	71	68	dre_Tcell	transmembrane	thrb	thyroid hormone receptor beta [Source:ZFIN;Acc:ZDB-GENE-990415-268]
ENSDARG00000021208	40	57	53	52	54	49	43	50	50	51	51	75	75	74	71	71	82	No.Diff.Exp	transmembrane	serpind1	serpin peptidase inhibitor, clade D (heparin cofactor), member 1 [Source:ZFIN;Acc:ZDB-GENE-030711-2]
ENSDARG00000021241	0	46	0	0	0	0	0	0	0	0	0	52	64	56	0	41	77	No.Diff.Exp	transmembrane	zgc:165604	zgc:165604 [Source:ZFIN;Acc:ZDB-GENE-070615-34]
ENSDARG00000021242	0	72	66	69	65	67	62	68	68	57	68	83	84	54	83	41	17	No.Diff.Exp	non-transmembrane	mvp	major vault protein [Source:ZFIN;Acc:ZDB-GENE-030826-33]
ENSDARG00000021252	0	90	89	0	88	66.5	86	78	83	85	85	93	93	91	85	89	94	No.Diff.Exp	non-transmembrane	cct6a	chaperonin containing TCP1, subunit 6A (zeta 1) [Source:ZFIN;Acc:ZDB-GENE-011018-2]
ENSDARG00000021257	44	86	90	90	49	89	90	90	90	90	90	95	95	92	95	93	95	No.Diff.Exp	non-transmembrane	eif3d	eukaryotic translation initiation factor 3, subunit D [Source:ZFIN;Acc:ZDB-GENE-030131-8442]
ENSDARG00000021352	41	73	69	74	75	72	62	74	68	75	75	64	85	77	89	79	82	No.Diff.Exp	transmembrane	gria1a	glutamate receptor, ionotropic, AMPA 1a [Source:ZFIN;Acc:ZDB-GENE-020125-1]
ENSDARG00000021366	52	82	72	80	80	64	52	77	76	80	80	0	87	0	83	85	93	dre_NK	non-transmembrane	fbp1a	fructose-1,6-bisphosphatase 1a [Source:ZFIN;Acc:ZDB-GENE-030131-7171]
ENSDARG00000021374	75	0	0	0	0	0	0	0	0	0	0	91	91	0	89	0	94	No.Diff.Exp	non-transmembrane	cab39l1	calcium binding protein 39, like 1 [Source:ZFIN;Acc:ZDB-GENE-040426-2897]
ENSDARG00000021392	0	0	0	0	0	0	0	0	0	0	0	82	84	72	0	80	90	No.Diff.Exp	transmembrane	CU459160.1
ENSDARG00000021398	43	38	0	51	50	0	0	0	0	0	0	55	55	72	54	55	73	No.Diff.Exp	transmembrane	mul1a	mitochondrial E3 ubiquitin protein ligase 1a [Source:ZFIN;Acc:ZDB-GENE-050102-5]
ENSDARG00000021405	0	71	67	75	0	70	60	73	68	73	73	82	84	66	81	77	90	No.Diff.Exp	non-transmembrane	chd3	chromodomain helicase DNA binding protein 3 [Source:ZFIN;Acc:ZDB-GENE-121031-4]
ENSDARG00000021444	0	35	26.8889	32	30	31	34	35	33	37	37	48.6667	43.3333	0	49	0	55	dre_NK	transmembrane	prf1.2	perforin 1.2 [Source:ZFIN;Acc:ZDB-GENE-111212-3]
ENSDARG00000021455	42	70	68	66	70	70	44	70	70	70	70	73	76	66	54	61	49	No.Diff.Exp	transmembrane	strbp	spermatid perinuclear RNA binding protein [Source:ZFIN;Acc:ZDB-GENE-030729-18]
ENSDARG00000021483	0	57	55	51	55	51	34	51	52	51	51	67	67	65	65	65	73	No.Diff.Exp	non-transmembrane	cdc14b	cell division cycle 14B [Source:ZFIN;Acc:ZDB-GENE-040426-820]
ENSDARG00000021488	81	65	88	91	92	85	74	92	91	91	91	89	88	89	83	72	93	No.Diff.Exp	non-transmembrane	cyth1b	cytohesin 1b [Source:ZFIN;Acc:ZDB-GENE-030131-4311]
ENSDARG00000021509	16	56	54	56	57	50	39	55	55	56	56	64	61	15	69	59	74	No.Diff.Exp	non-transmembrane	tab2	TGF-beta activated kinase 1/MAP3K7 binding protein 2 [Source:ZFIN;Acc:ZDB-GENE-040426-933]
ENSDARG00000021521	30	36	37	36	38	33	38	37	37	38	38	50	53	41	48	48	48	No.Diff.Exp	non-transmembrane	rgs14a	regulator of G-protein signaling 14a [Source:ZFIN;Acc:ZDB-GENE-030131-5579]
ENSDARG00000021556	50	0	0	0	0	0	0	0	0	0	0	88	88	87	87	89	96	No.Diff.Exp	non-transmembrane	ubl3b	ubiquitin-like 3b [Source:ZFIN;Acc:ZDB-GENE-040630-4]
ENSDARG00000021557	0	96	95	94	95	82	77	95	95	96	96	99	98	0	98	92	98	No.Diff.Exp	non-transmembrane	wdr45b	WD repeat domain 45B [Source:ZFIN;Acc:ZDB-GENE-040426-863]
ENSDARG00000021647	80	0	0	0	0	0	0	0	0	0	0	0	0	0	0	0	97	No.Diff.Exp	non-transmembrane	gnai1	guanine nucleotide binding protein (G protein), alpha inhibiting activity polypeptide 1 [Source:ZFIN;Acc:ZDB-GENE-040426-1310]
ENSDARG00000021669	94	86	97	96	96	92	72	97	97	96	97	100	100	98	98	99	100	No.Diff.Exp	transmembrane	sec61a1	Sec61 translocon alpha 1 subunit [Source:ZFIN;Acc:ZDB-GENE-020418-2]
ENSDARG00000021677	0	0	0	13	14	13	0	12.6	12	15	15	0	12	12	0	0	18	No.Diff.Exp	non-transmembrane	phf11	PHD finger protein 11 [Source:ZFIN;Acc:ZDB-GENE-081104-417]
ENSDARG00000021702	19	34	40	69	0	0	0	0	0	0	0	77	79	78	76	75	27	No.Diff.Exp	non-transmembrane	pdcd4a	programmed cell death 4a [Source:ZFIN;Acc:ZDB-GENE-040426-1920]
ENSDARG00000021806	0	49	48	49	0	50	48	50	51	43	50	54	54	0	54	54	55	No.Diff.Exp	non-transmembrane	zfp36l2	zinc finger protein 36, C3H type-like 2 [Source:ZFIN;Acc:ZDB-GENE-030131-5873]
ENSDARG00000021811	99	99	100	0	99	99	99	0	100	100	0	100	100	97.3333	0	97.3333	100	No.Diff.Exp	non-transmembrane	calm1a	calmodulin 1a [Source:ZFIN;Acc:ZDB-GENE-030131-8308]
ENSDARG00000021833	17.6667	6	0	0	27	0	0	0	0	0	0	34	34	34	31	32	19	No.Diff.Exp	non-transmembrane	ahr2	aryl hydrocarbon receptor 2 [Source:ZFIN;Acc:ZDB-GENE-990714-16]
ENSDARG00000021838	96	99	99	99	99	99	99	99	90.25	84	99	100	100	98	0	100	99	No.Diff.Exp	non-transmembrane	rps23	ribosomal protein S23 [Source:ZFIN;Acc:ZDB-GENE-080220-50]
ENSDARG00000021855	0	53	57	56	56	53	45	57	57	57	58	62	62	62	62	60	71	No.Diff.Exp	non-transmembrane	arnt	aryl hydrocarbon receptor nuclear translocator [Source:ZFIN;Acc:ZDB-GENE-060126-7]
ENSDARG00000021864	76	77.5	77	83	85	69	60.6	79	73.6667	81	81	90	89	0	81	80	90	No.Diff.Exp	non-transmembrane	rplp1	ribosomal protein, large, P1 [Source:ZFIN;Acc:ZDB-GENE-030131-8663]
ENSDARG00000021882	0	81	81	83	0	83	83	83	83	83	83	86	86	84	86	76.3333	88	No.Diff.Exp	transmembrane	fbxl3b	F-box and leucine-rich repeat protein 3b [Source:ZFIN;Acc:ZDB-GENE-041010-178]
ENSDARG00000021905	65	82	81	82	84	74	68	82	81	83	83	79	79	54	66	70	0	No.Diff.Exp	transmembrane	derl1	derlin 1 [Source:ZFIN;Acc:ZDB-GENE-040426-2793]
ENSDARG00000021945	75	81	78	84	28.5	78	84	84	84	84	84	87	87	83	86	39	88	No.Diff.Exp	non-transmembrane	ddx23	DEAD (Asp-Glu-Ala-Asp) box polypeptide 23 [Source:ZFIN;Acc:ZDB-GENE-030131-6215]
ENSDARG00000021973	40	68	70	53.5	69	65	47	69	69	0	70	72	77	63	70	69	19	No.Diff.Exp	non-transmembrane	st13	suppression of tumorigenicity 13 (colon carcinoma) (Hsp70 interacting protein) [Source:ZFIN;Acc:ZDB-GENE-030131-5395]
ENSDARG00000021975	0	13	0	28.5	32	0	19	28	27	28	28	0	32	25	0	0	56	No.Diff.Exp	transmembrane	ginm1	glycoprotein integral membrane 1 [Source:ZFIN;Acc:ZDB-GENE-030131-5900]
ENSDARG00000021982	15	44	0	41	43	38	33	44	44	22	45	49	47	39	44	44	50	dre_NK	non-transmembrane	sh3bp2	SH3-domain binding protein 2 [Source:ZFIN;Acc:ZDB-GENE-091204-268]
ENSDARG00000021984	51	68	75	70	71	54	0	60	56	64	64	71	74	70	70	73	73	No.Diff.Exp	non-transmembrane	ndufa2	NADH dehydrogenase (ubiquinone) 1 alpha subcomplex, 2 [Source:ZFIN;Acc:ZDB-GENE-050522-377]
ENSDARG00000022085	0	0	23	0	32	0	0	0	0	0	0	42	39	27	41	39	33	No.Diff.Exp	non-transmembrane	si:dkey-34e4.1	si:dkey-34e4.1 [Source:ZFIN;Acc:ZDB-GENE-070705-456]
ENSDARG00000022129	24	22	40	40	32	40.5	29.5	40.6667	40.5	40.5	37.6667	66.3333	68	50	65	66	72	No.Diff.Exp	non-transmembrane	rbm4.3	RNA binding motif protein 4.3 [Source:ZFIN;Acc:ZDB-GENE-040426-1938]
ENSDARG00000022254	0	75	85	0	82	83	55	87	87	86	87	89	93	90	82	74	54	No.Diff.Exp	non-transmembrane	prkcbb	protein kinase C, beta b [Source:ZFIN;Acc:ZDB-GENE-040426-1178]
ENSDARG00000022280	35	55	57	52	55	60	34	60	59	59	59	69	71	51	70	65	75	dre_Myel	non-transmembrane	brd2a	bromodomain containing 2a [Source:ZFIN;Acc:ZDB-GENE-990415-248]
ENSDARG00000022303	52	53.6667	54.3333	60	54	62	37	60	58	62	58.5	61	64	64	62	61	66	dre_Tcell	transmembrane	higd1a	HIG1 hypoxia inducible domain family, member 1A [Source:ZFIN;Acc:ZDB-GENE-030826-15]
ENSDARG00000022315	35	83	58	80	78	77	65	78	64.5	77	77	84	86	83	89	83	92	No.Diff.Exp	non-transmembrane	atp6v1g1	ATPase, H+ transporting, lysosomal, V1 subunit G1 [Source:ZFIN;Acc:ZDB-GENE-030131-6965]
ENSDARG00000022415	0	56	49	55	58	58	38	58	46	58	58	57	64	0	55	0	0	No.Diff.Exp	non-transmembrane	srsf10a	serine/arginine-rich splicing factor 10a [Source:ZFIN;Acc:ZDB-GENE-131121-145]
ENSDARG00000022438	0	68	63	63	61	56	0	53	51	51	51	72	76	75	77	75	73	No.Diff.Exp	non-transmembrane	cox6a1	cytochrome c oxidase subunit VIa polypeptide 1 [Source:ZFIN;Acc:ZDB-GENE-030131-7715]
ENSDARG00000022456	0	0	0	32	0	0	0	0	0	0	0	96	95	94	94	91	96	No.Diff.Exp	non-transmembrane	eno1a	enolase 1a, (alpha) [Source:ZFIN;Acc:ZDB-GENE-030131-6048]
ENSDARG00000022599	31.5	73	71	67	70	67	63	69	68	69	69	80	83	38	82	80	86	No.Diff.Exp	non-transmembrane	dnpep	aspartyl aminopeptidase [Source:ZFIN;Acc:ZDB-GENE-040426-852]
ENSDARG00000022623	21	37	30	28.5	39	26.5	28.5	36.5	36.5	36.5	36.5	46.6667	49	28	47	47	52	No.Diff.Exp	non-transmembrane	fbxo44	F-box protein 44 [Source:ZFIN;Acc:ZDB-GENE-041212-85]
ENSDARG00000022652	40	58	27	49	50	45	35	51	50	51	51	60	63	58	0	0	74	No.Diff.Exp	non-transmembrane	psmf1	proteasome (prosome, macropain) inhibitor subunit 1 [Source:ZFIN;Acc:ZDB-GENE-040718-282]
ENSDARG00000022660	31	22	45	45	42	43	32	5	43	44	44	47	49	41	47	45	58	No.Diff.Exp	non-transmembrane	armc2	armadillo repeat containing 2 [Source:ZFIN;Acc:ZDB-GENE-041014-7]
ENSDARG00000022684	85	75	73	0	0	0	0	0	0	0	0	0	0	0	81	85	98	No.Diff.Exp	non-transmembrane	fkbp1aa	FK506 binding protein 1Aa [Source:ZFIN;Acc:ZDB-GENE-030131-7275]
ENSDARG00000022712	51	75	69	82	83	81	70	83	83	83	83	87.5	91	91	91	34.5	89	No.Diff.Exp	non-transmembrane	stat3	signal transducer and activator of transcription 3 (acute-phase response factor) [Source:ZFIN;Acc:ZDB-GENE-980526-68]
ENSDARG00000022807	1	50	57	28.5	45.6667	49	39	52	34.5	56	56	0	0	0	0	0	22	No.Diff.Exp	non-transmembrane	PITPNC1	phosphatidylinositol transfer protein, cytoplasmic 1 [Source:HGNC Symbol;Acc:HGNC:21045]
ENSDARG00000022983	33	59	50	51	49	22	53	55	54	56	56	55	61	0	57	56	64	No.Diff.Exp	non-transmembrane	ccdc28a	coiled-coil domain containing 28A [Source:ZFIN;Acc:ZDB-GENE-030131-5007]
ENSDARG00000023028	0	54	51	39	39	44	33	50	41	51	52	80	78	68	77	69	80	No.Diff.Exp	non-transmembrane	cdv3	carnitine deficiency-associated gene expressed in ventricle 3 [Source:ZFIN;Acc:ZDB-GENE-030131-6034]
ENSDARG00000023040	14	48	45	47	30	48	0	48	38	48	48	63	65	18	52	56	70	No.Diff.Exp	non-transmembrane	zbtb1	zinc finger and BTB domain containing 1 [Source:ZFIN;Acc:ZDB-GENE-041001-126]
ENSDARG00000023053	0	39	0	33	39	39	30	39	39	39	39	22.5	31	0	0	0	55	No.Diff.Exp	non-transmembrane	fam129ab	family with sequence similarity 129, member Ab [Source:ZFIN;Acc:ZDB-GENE-070912-688]
ENSDARG00000023058	0	60	58	0	44	54	51	58	58	58	58	64	67	43	66	64	81	No.Diff.Exp	non-transmembrane	foxo3a	forkhead box O3A [Source:ZFIN;Acc:ZDB-GENE-050116-1]
ENSDARG00000023111	24	42	54	60	58	0	31	57	56	52.5	52.5	70	63.5	65	70	71	75	No.Diff.Exp	transmembrane	plg	plasminogen [Source:ZFIN;Acc:ZDB-GENE-030131-1411]
ENSDARG00000023190	81	86	85	61.5	87	87	60	90	90	90	90	89	90	90	86	86	92	No.Diff.Exp	non-transmembrane	kpna4	karyopherin alpha 4 (importin alpha 3) [Source:ZFIN;Acc:ZDB-GENE-030131-5584]
ENSDARG00000023290	0	67	68	0	69	70	74	72.5	74	73	73	69	71	72	65	67	83	No.Diff.Exp	non-transmembrane	fabp3	fatty acid binding protein 3, muscle and heart [Source:ZFIN;Acc:ZDB-GENE-020318-2]
ENSDARG00000023298	0	0	95	0	0	0	0	0	0	0	0	95.75	0	92	98	95	98.5	No.Diff.Exp	non-transmembrane	rps27.1	ribosomal protein S27, isoform 1 [Source:ZFIN;Acc:ZDB-GENE-050522-549]
ENSDARG00000023299	0	94	91	84	92	49	0	90	80.3333	90	90	97	97	95	96	96	97	No.Diff.Exp	non-transmembrane	snu13b	SNU13 homolog, small nuclear ribonucleoprotein b (U4/U6.U5) [Source:ZFIN;Acc:ZDB-GENE-030131-9670]
ENSDARG00000023303	15	20	0	0	0	0	0	0	0	0	0	70	69	73	64	67	55	No.Diff.Exp	non-transmembrane	zgc:66427	zgc:66427 [Source:ZFIN;Acc:ZDB-GENE-040426-1913]
ENSDARG00000023323	76	32	78	77	77	75.5	65	77	75	76	76	85	83	86	71	53	0	No.Diff.Exp	non-transmembrane	ywhaqb	tyrosine 3-monooxygenase/tryptophan 5-monooxygenase activation protein, theta polypeptide b [Source:ZFIN;Acc:ZDB-GENE-030131-7135]
ENSDARG00000023330	30	81	69	77	61	67	47	69	68	72	72	79	67	72	75	80	80	No.Diff.Exp	non-transmembrane	anp32b	acidic (leucine-rich) nuclear phosphoprotein 32 family, member B [Source:ZFIN;Acc:ZDB-GENE-030131-719]
ENSDARG00000023369	37	0	0	0	0	0	0	0	0	0	0	0	0	0	0	0	26.6667	dre_Tcell	non-transmembrane	mxd	myxovirus (influenza virus) resistance D [Source:ZFIN;Acc:ZDB-GENE-030721-8]
ENSDARG00000023394	23	71	61	72	72	68	54.5	70	70	70	70	68	79	74	53	75	84	No.Diff.Exp	transmembrane	slc37a2	solute carrier family 37 (glucose-6-phosphate transporter), member 2 [Source:ZFIN;Acc:ZDB-GENE-040426-1949]
ENSDARG00000023396	0	81	79	81	68	81	37	80	69	81	81	84	86	72	85	39.5	25	No.Diff.Exp	non-transmembrane	atg5	ATG5 autophagy related 5 homolog (S. cerevisiae) [Source:ZFIN;Acc:ZDB-GENE-040801-149]
ENSDARG00000023472	57	0	0	0	0	0	0	0	0	0	0	91	92	90	92	92	95	No.Diff.Exp	non-transmembrane	ctnnb2	catenin, beta 2 [Source:ZFIN;Acc:ZDB-GENE-040426-2575]
ENSDARG00000023532	29	18	44	43	0	42	37	46	45	44	44	48	48	44	46	43	50	dre_NK	non-transmembrane	pinx1	PIN2/TERF1 interacting, telomerase inhibitor 1 [Source:ZFIN;Acc:ZDB-GENE-030515-2]
ENSDARG00000023712	38	77	68.5	70.5	64.5	56	53.5	69	70	68.5	69	83	79	75	82	80	90	No.Diff.Exp	non-transmembrane	mao	monoamine oxidase [Source:ZFIN;Acc:ZDB-GENE-040329-3]
ENSDARG00000023724	0	59	67	39	63	69	68	71	68	69	69	80	0	0	71	70	0	dre_NK	non-transmembrane	cdc42se1	CDC42 small effector 1 [Source:ZFIN;Acc:ZDB-GENE-030131-9260]
ENSDARG00000023814	0	83	62.5	83	83	64	63	83	83	83	83	91	91	91	91	27	94	No.Diff.Exp	non-transmembrane	dyrk1ab	dual-specificity tyrosine-(Y)-phosphorylation regulated kinase 1A, b [Source:ZFIN;Acc:ZDB-GENE-030131-5677]
ENSDARG00000023852	0	88	87	0	87	52	58	83	83	43	85	86	86	86	83	85	90	No.Diff.Exp	non-transmembrane	lsm4	LSM4 homolog, U6 small nuclear RNA and mRNA degradation associated [Source:ZFIN;Acc:ZDB-GENE-040426-1652]
ENSDARG00000023868	18	27	31	0	42	37	41	51	50	52	52	45	36	36.5	51	38	60	No.Diff.Exp	non-transmembrane	AKAP13 (1 of 2)	A kinase (PRKA) anchor protein 13 [Source:HGNC Symbol;Acc:HGNC:371]
ENSDARG00000023878	0	83	76	83	61	77	61	82	79	81	81	78	86	84	85	85	83	No.Diff.Exp	non-transmembrane	stk24b	serine/threonine kinase 24b (STE20 homolog, yeast) [Source:ZFIN;Acc:ZDB-GENE-040426-2841]
ENSDARG00000023920	0	67	62	65	55	53	58	65	64	65	66	54	78	77	80	77	85	No.Diff.Exp	non-transmembrane	llgl2	lethal giant larvae homolog 2 (Drosophila) [Source:ZFIN;Acc:ZDB-GENE-030131-9877]
ENSDARG00000023988	72	87	75	86	85	82	50	82	84	85	85	89	91	89	87	86	93	No.Diff.Exp	non-transmembrane	dctn4	dynactin 4 [Source:ZFIN;Acc:ZDB-GENE-050417-306]
ENSDARG00000023989	0	43	63	60	49	61	62	60	60	62	62	62	66	57	61	61	75	No.Diff.Exp	non-transmembrane	pef1	penta-EF-hand domain containing 1 [Source:ZFIN;Acc:ZDB-GENE-040801-259]
ENSDARG00000024090	0	0	43	45	0	34	37	44	43	42	41	61	61	52	58	58	62	No.Diff.Exp	transmembrane	dnajc4	DnaJ (Hsp40) homolog, subfamily C, member 4 [Source:ZFIN;Acc:ZDB-GENE-030131-3093]
ENSDARG00000024116	0	52	0	43	0	52	49	52	52	51	51	67	39	65	59	38	69	dre_NK	transmembrane	vamp8	vesicle-associated membrane protein 8 (endobrevin) [Source:ZFIN;Acc:ZDB-GENE-030131-5215]
ENSDARG00000024209	0	63	57	62	62	63	62	63	61	59	64	66	69	50	66	54	70	No.Diff.Exp	non-transmembrane	wasf2	WAS protein family, member 2 [Source:ZFIN;Acc:ZDB-GENE-040426-865]
ENSDARG00000024306	8	50	48	49	50	47	50	47	47	48	48	59	61	11	0	57	61	No.Diff.Exp	non-transmembrane	zbed4	zinc finger, BED-type containing 4 [Source:ZFIN;Acc:ZDB-GENE-041210-305]
ENSDARG00000024314	33	42	38	36	38	39	34	41	42	42	42	48	48	48	47	43	0	dre_NK	transmembrane	herpud1	homocysteine-inducible, endoplasmic reticulum stress-inducible, ubiquitin-like domain member 1 [Source:ZFIN;Acc:ZDB-GENE-050913-47]
ENSDARG00000024416	0	38	34	24	34	28	0	38	37	40	40	37	38	31	33	33	44	No.Diff.Exp	non-transmembrane	twistnb	TWIST neighbor [Source:ZFIN;Acc:ZDB-GENE-041007-3]
ENSDARG00000024431	0	0	0	0	0	0	0	0	0	0	0	0	0	0	0	14	0	No.Diff.Exp	non-transmembrane	ETS1	v-ets avian erythroblastosis virus E26 oncogene homolog 1 [Source:HGNC Symbol;Acc:HGNC:3488]
ENSDARG00000024561	26	27	26	24	26	28	25	27	28	28	27	25	24	11	0	22	33	No.Diff.Exp	non-transmembrane	nolc1	nucleolar and coiled-body phosphoprotein 1 [Source:ZFIN;Acc:ZDB-GENE-030131-6349]
ENSDARG00000024564	22	61	42	58	55	52	40	59	58	59	59	0	0	0	0	0	76	No.Diff.Exp	transmembrane	sccpdhb	saccharopine dehydrogenase b [Source:ZFIN;Acc:ZDB-GENE-041010-211]
ENSDARG00000024669	34	49	46	35	44	45	29	45	44	45	45	48	52	0	48	46	63	No.Diff.Exp	non-transmembrane	oser1	oxidative stress responsive serine-rich 1 [Source:ZFIN;Acc:ZDB-GENE-040426-1325]
ENSDARG00000024717	65	71	75	57	63	71	64	71.5	73	75	74	73	82	71	80	80	0	No.Diff.Exp	non-transmembrane	selenbp1	selenium binding protein 1 [Source:ZFIN;Acc:ZDB-GENE-040426-1436]
ENSDARG00000024815	26	0	34	38	40	37	30	39	39	37	37	37	0	36	40	38	0	No.Diff.Exp	non-transmembrane	ogfrl2	opioid growth factor receptor-like 2 [Source:ZFIN;Acc:ZDB-GENE-030616-523]
ENSDARG00000024844	62	82	64	0	73	76	56	81	81	82	82	89	92	74	85	84	84	No.Diff.Exp	non-transmembrane	max	myc associated factor X [Source:ZFIN;Acc:ZDB-GENE-990415-152]
ENSDARG00000024874	0	74	68	75	75	74	56	79	77	78	79	82	87	78	86	83	83	No.Diff.Exp	non-transmembrane	dock4b	dedicator of cytokinesis 4b [Source:ZFIN;Acc:ZDB-GENE-060130-74]
ENSDARG00000024895	82	90	87	88	0	86	79	80	82.6667	74	78	92	93	82	90	83	96	No.Diff.Exp	non-transmembrane	fam50a	family with sequence similarity 50, member A [Source:ZFIN;Acc:ZDB-GENE-050417-110]
ENSDARG00000025032	0	49	47	49	50	49	42	49	24.5	49	49	66	49	67	60	65	69	No.Diff.Exp	non-transmembrane	nr3c1	nuclear receptor subfamily 3, group C, member 1 (glucocorticoid receptor) [Source:ZFIN;Acc:ZDB-GENE-050522-503]
ENSDARG00000025073	81	89	91	91	87	87	88	85.5	88	90	91	95	95	95	93	97	96	No.Diff.Exp	non-transmembrane	rpl18a	ribosomal protein L18a [Source:ZFIN;Acc:ZDB-GENE-040426-1071]
ENSDARG00000025091	0	75	78	80	79	78	65	79	79	79	79	83	84	69	73	77	0	No.Diff.Exp	non-transmembrane	ezrb	ezrin b [Source:ZFIN;Acc:ZDB-GENE-050803-1]
ENSDARG00000025147	42	47	50	43	0	43	34	43	42	45	45	51	62	57	57	61	0	No.Diff.Exp	transmembrane	cd63	CD63 molecule [Source:ZFIN;Acc:ZDB-GENE-030131-180]
ENSDARG00000025269	25	58	68	72	73	71	67	72	72	73	73	83	83	67	82	44	89	No.Diff.Exp	non-transmembrane	pdcd6ip	programmed cell death 6 interacting protein [Source:ZFIN;Acc:ZDB-GENE-040426-2678]
ENSDARG00000025332	18	30	41	16	0	44	37	44	43	44	44	45	48	46	48	46	51	No.Diff.Exp	non-transmembrane	rbm28	RNA binding motif protein 28 [Source:ZFIN;Acc:ZDB-GENE-040426-960]
ENSDARG00000025350	78	34	76	75	0	68	73	55.5	77	77	77	85	86	85	84	84	88	No.Diff.Exp	non-transmembrane	prdx2	peroxiredoxin 2 [Source:ZFIN;Acc:ZDB-GENE-030326-2]
ENSDARG00000025397	71	80	84	84	84	84	33	82.5	84	84	84	83	86	62	0	81.5	86	No.Diff.Exp	non-transmembrane	srsf3a	serine/arginine-rich splicing factor 3a [Source:ZFIN;Acc:ZDB-GENE-030616-631]
ENSDARG00000025535	42	50	57	61	57	60	34	62	45	0	63	68	68	62	64	63	72	No.Diff.Exp	non-transmembrane	clint1a	clathrin interactor 1a [Source:ZFIN;Acc:ZDB-GENE-030131-2590]
ENSDARG00000025549	47	61	61	57	55	0	0	49	49	51	51	62	70	64	63	65	71	No.Diff.Exp	non-transmembrane	ndufaf1	NADH dehydrogenase (ubiquinone) complex I, assembly factor 1 [Source:ZFIN;Acc:ZDB-GENE-050306-9]
ENSDARG00000025554	0	65	89	84	88	88	82	88	44	88	88	93	95	95	95	84	94	No.Diff.Exp	transmembrane	WDR83OS	WD repeat domain 83 opposite strand [Source:HGNC Symbol;Acc:HGNC:30203]
ENSDARG00000025559	0	36	54	18	54	52	31	50	52	52	53	69.5	69	66	46	65	73	No.Diff.Exp	non-transmembrane	pex11g	peroxisomal biogenesis factor 11 gamma [Source:ZFIN;Acc:ZDB-GENE-050913-79]
ENSDARG00000025566	0	84	70	82	82	69	70	81	80	80	80	0	0	0	0	0	94	No.Diff.Exp	transmembrane	slc25a3b	solute carrier family 25 (mitochondrial carrier; phosphate carrier), member 3b [Source:ZFIN;Acc:ZDB-GENE-040426-1916]
ENSDARG00000025581	87	78	92	93	47	89	88	90.6667	72	88.5	89.5	97	96	87	94	95	94	No.Diff.Exp	non-transmembrane	rpl10	ribosomal protein L10 [Source:ZFIN;Acc:ZDB-GENE-030131-8656]
ENSDARG00000025593	0	59	65	15	62	37	43	61	61	62	56	81	0	82	64	80	68	No.Diff.Exp	non-transmembrane	plekhj1	pleckstrin homology domain containing, family J member 1 [Source:ZFIN;Acc:ZDB-GENE-040426-2480]
ENSDARG00000025703	62	45	68	62	66	57	55	66	66	66	66	69	69	69	70	0	74	No.Diff.Exp	non-transmembrane	dmgdh	dimethylglycine dehydrogenase [Source:ZFIN;Acc:ZDB-GENE-080227-8]
ENSDARG00000025789	0	59	45.5	75	76	72	63	76	76	59	76	81	82	48	82	80	89	No.Diff.Exp	non-transmembrane	chd4b	chromodomain helicase DNA binding protein 4b [Source:ZFIN;Acc:ZDB-GENE-030131-4532]
ENSDARG00000025797	59	67	75	75	75	74	57	74	74	74	74	83	84	83	83	84	89	No.Diff.Exp	non-transmembrane	abhd2a	abhydrolase domain containing 2a [Source:ZFIN;Acc:ZDB-GENE-040426-784]
ENSDARG00000025847	37	42	31	39	0	37	0	37	37	34	37	0	0	0	0	0	80	No.Diff.Exp	non-transmembrane	sox12	SRY (sex determining region Y)-box 12 [Source:ZFIN;Acc:ZDB-GENE-040724-33]
ENSDARG00000025850	83	91	90	90	89	51	52	88	85	90	90	91	90	0	89	44	94	No.Diff.Exp	non-transmembrane	rps21	ribosomal protein S21 [Source:ZFIN;Acc:ZDB-GENE-040426-1102]
ENSDARG00000025858	18	23	21	22	20	22	0	23	22	22	22	27	30	26	14	0	39	dre_Tcell	transmembrane	GOLM1	golgi membrane protein 1 [Source:HGNC Symbol;Acc:HGNC:15451]
ENSDARG00000025903	0	41	37	32	0	36	31.5	42	42	41.5	43	55	56	0	52	52	63	dre_NK	non-transmembrane	lgals9l1	lectin, galactoside-binding, soluble, 9 (galectin 9)-like 1 [Source:ZFIN;Acc:ZDB-GENE-030131-9543]
ENSDARG00000026028	0	32	0	67	64	62	48	65	65	63	65	77	77	65	78	49	71	No.Diff.Exp	non-transmembrane	ankrd44	ankyrin repeat domain 44 [Source:ZFIN;Acc:ZDB-GENE-070912-605]
ENSDARG00000026035	89	0	0	0	0	0	0	0	0	0	0	97	96	56	97	96	98	No.Diff.Exp	non-transmembrane	ube2b	ubiquitin-conjugating enzyme E2B (RAD6 homolog) [Source:ZFIN;Acc:ZDB-GENE-040718-247]
ENSDARG00000026070	35	64	56	48.5	57	59	45	57	57	55	55	71	64	60	71	70	0	No.Diff.Exp	transmembrane	cd82b	CD82 molecule b [Source:ZFIN;Acc:ZDB-GENE-030131-2857]
ENSDARG00000026180	90	91	97	80	97	97	95	97	97	19	97	99	99	97	98	93	98	No.Diff.Exp	non-transmembrane	prpf8	pre-mRNA processing factor 8 [Source:ZFIN;Acc:ZDB-GENE-030131-577]
ENSDARG00000026183	0	96	96	0	95	94	0	95	95	85.5	93	99	98	98	99	99	67	No.Diff.Exp	non-transmembrane	polr2eb	polymerase (RNA) II (DNA directed) polypeptide E, b [Source:ZFIN;Acc:ZDB-GENE-040801-83]
ENSDARG00000026185	52	63	49	66	60	47	0	60	59.5	50	62	70	73	65	69	69	72	No.Diff.Exp	non-transmembrane	ccdc94	coiled-coil domain containing 94 [Source:ZFIN;Acc:ZDB-GENE-040426-841]
ENSDARG00000026281	0	59	55	54	48	55	36.5	53	52	53	53	68	0	64	62	65	47	No.Diff.Exp	non-transmembrane	lyrm1	LYR motif containing 1 [Source:ZFIN;Acc:ZDB-GENE-040718-210]
ENSDARG00000026322	0	52	52	46	44	43	49	48	46	36	48	0	0	0	0	0	69	No.Diff.Exp	transmembrane	dhrs13a.1	dehydrogenase/reductase (SDR family) member 13a, tandem duplicate 1 [Source:ZFIN;Acc:ZDB-GENE-041114-58]
ENSDARG00000026350	0	46	40	50	0	27	28	52	51	0	53	0	0	0	0	0	62	No.Diff.Exp	non-transmembrane	wasb	Wiskott-Aldrich syndrome (eczema-thrombocytopenia) b [Source:ZFIN;Acc:ZDB-GENE-030131-7098]
ENSDARG00000026453	0	0	0	0	0	0	0	0	0	0	0	0	0	0	0	0	0	No.Diff.Exp	non-transmembrane	zgc:66474	zgc:66474 [Source:ZFIN;Acc:ZDB-GENE-030131-5711]
ENSDARG00000026476	52	81	77	0	79	79	58	78	78	80	80	79	79	77	79	78	92	No.Diff.Exp	non-transmembrane	tia1l	cytotoxic granule-associated RNA binding protein 1, like [Source:ZFIN;Acc:ZDB-GENE-030131-2167]
ENSDARG00000026489	40	63	60	68	0	66	56	69	69	67	69	70	71	72	67	67	66	No.Diff.Exp	non-transmembrane	khsrp	KH-type splicing regulatory protein [Source:ZFIN;Acc:ZDB-GENE-030131-4357]
ENSDARG00000026519	0	56	70	83	83	74	60	83	83	83	83	89	90	69	86	82	94	dre_Tcell	non-transmembrane	ralgps2	Ral GEF with PH domain and SH3 binding motif 2 [Source:ZFIN;Acc:ZDB-GENE-040426-1212]
ENSDARG00000026595	74	93	93	94	94	93	54	93	93	93	94	0	0	0	0	0	97	No.Diff.Exp	non-transmembrane	pafah1b1b	platelet-activating factor acetylhydrolase 1b, regulatory subunit 1b [Source:ZFIN;Acc:ZDB-GENE-040116-3]
ENSDARG00000026611	0	63	60	61	63	62	62	62	62	62	62	47	58	37.5	0	56	84	No.Diff.Exp	non-transmembrane	socs3b	suppressor of cytokine signaling 3b [Source:ZFIN;Acc:ZDB-GENE-040426-2528]
ENSDARG00000026630	52.6667	83	81	83	83	74	65	79	81	80	80	46	67	66	68.5	70	76	No.Diff.Exp	non-transmembrane	mark3b	MAP/microtubule affinity-regulating kinase 3b [Source:ZFIN;Acc:ZDB-GENE-060929-80]
ENSDARG00000026634	33	54	47	51	50	50	34	52	52	50	52	61	64	33	54	54	12	No.Diff.Exp	non-transmembrane	ehmt1b	euchromatic histone-lysine N-methyltransferase 1b [Source:ZFIN;Acc:ZDB-GENE-080515-3]
ENSDARG00000026680	0	79	80	80	81	79	70	79	79	79	79	85	92	89	92	91	95	dre_Tcell	non-transmembrane	slc25a14	solute carrier family 25 (mitochondrial carrier, brain), member 14 [Source:ZFIN;Acc:ZDB-GENE-040426-749]
ENSDARG00000026682	66	74	60	65	67	0	0	0	0	0	0	79	78	74	79	75	72	No.Diff.Exp	transmembrane	zgc:101583	zgc:101583 [Source:ZFIN;Acc:ZDB-GENE-041212-75]
ENSDARG00000026712	75.3333	86	0	86	86	87	76	88	79	88	78	93.3333	91.5	94	91	90.5	97	No.Diff.Exp	non-transmembrane	rab5c	RAB5C, member RAS oncogene family [Source:ZFIN;Acc:ZDB-GENE-031118-30]
ENSDARG00000026723	68	84	83	85	67	69	66	84	85	84	84	86	84	87	85	84	91	No.Diff.Exp	non-transmembrane	syncripl	synaptotagmin binding, cytoplasmic RNA interacting protein, like [Source:ZFIN;Acc:ZDB-GENE-030131-3104]
ENSDARG00000026762	37.6667	61	59	49	63	62	26	61	61	62	62	59	60	71	67	71	65	No.Diff.Exp	non-transmembrane	fam126a	family with sequence similarity 126, member A [Source:ZFIN;Acc:ZDB-GENE-040426-1806]
ENSDARG00000026766	0	39	0	0	0	0	0	0	0	0	0	57	60	64	0	59	60	No.Diff.Exp	transmembrane	bcl2l10	BCL2-like 10 (apoptosis facilitator) [Source:ZFIN;Acc:ZDB-GENE-030825-2]
ENSDARG00000026829	0	71	69	45	71	70	72	70	71	45	71	75	78	76	73	75	78	dre_Myel	non-transmembrane	cotl1	coactosin-like F-actin binding protein 1 [Source:ZFIN;Acc:ZDB-GENE-030131-8325]
ENSDARG00000026842	0	0	31	31	0	39	27	39	38	39	39	43	24	29	36	37	40	No.Diff.Exp	non-transmembrane	acin1b	apoptotic chromatin condensation inducer 1b [Source:ZFIN;Acc:ZDB-GENE-030826-12]
ENSDARG00000026845	0	94	0	0	0	0	0	0	0	0	0	95	93	74	92	92	96	No.Diff.Exp	non-transmembrane	rhoaa	ras homolog gene family, member Aa [Source:ZFIN;Acc:ZDB-GENE-040426-2150]
ENSDARG00000026865	40	67	53	58	64	64	62	61	63	63	63	68	82	78	78	48	88	No.Diff.Exp	non-transmembrane	fam107b	family with sequence similarity 107, member B [Source:ZFIN;Acc:ZDB-GENE-031030-12]
ENSDARG00000026907	46.5	0	65	63	50	0	0	61	61	60	61	75	72	0	77	0	81	No.Diff.Exp	transmembrane	slc48a1a	solute carrier family 48 (heme transporter), member 1a [Source:ZFIN;Acc:ZDB-GENE-040718-121]
ENSDARG00000026908	61	90	88	84	85	80	70	88	88	0	88	95	93	87	0	92	93	No.Diff.Exp	transmembrane	tmed2	transmembrane emp24 domain trafficking protein 2 [Source:ZFIN;Acc:ZDB-GENE-030131-269]
ENSDARG00000026985	63	89	87	87	43.2	86	87	88	86	48.3333	87	84	89	90	93	88	74	No.Diff.Exp	non-transmembrane	lims1	LIM and senescent cell antigen-like domains 1 [Source:ZFIN;Acc:ZDB-GENE-050522-236]
ENSDARG00000027009	64	0	71	74	70	0	0	0	0	0	0	81	82	73	76	77	83	No.Diff.Exp	non-transmembrane	zgc:85777	zgc:85777 [Source:ZFIN;Acc:ZDB-GENE-040426-2210]
ENSDARG00000027063	67	79	79	0	80	81	80	82	80	81	81	82	83	77	82	83	93	No.Diff.Exp	non-transmembrane	arpc1b	actin related protein 2/3 complex, subunit 1B [Source:ZFIN;Acc:ZDB-GENE-030131-7414]
ENSDARG00000027078	19	50	45	46	0	40	38	45	45	45	46	54	57	45	49	22	60	No.Diff.Exp	non-transmembrane	cnppd1	cyclin Pas1/PHO80 domain containing 1 [Source:ZFIN;Acc:ZDB-GENE-030131-6808]
ENSDARG00000027099	72	62	96	96	0	95	81	97	97	97	97	96	96	55	95	33	61	No.Diff.Exp	non-transmembrane	psmc4	proteasome (prosome, macropain) 26S subunit, ATPase, 4 [Source:ZFIN;Acc:ZDB-GENE-030131-5083]
ENSDARG00000027109	19	77	73	78	78	76	71	80	80	76	80	81	63	72	83	43	90	No.Diff.Exp	non-transmembrane	zfr	zinc finger RNA binding protein [Source:ZFIN;Acc:ZDB-GENE-030131-378]
ENSDARG00000027141	58	51	0	75	73	74	48	74	37	73	78	0	0	66	0	0	77	No.Diff.Exp	non-transmembrane	ube2l3b	ubiquitin-conjugating enzyme E2L 3b [Source:ZFIN;Acc:ZDB-GENE-030131-662]
ENSDARG00000027222	0	6	0	0	0	0	0	0	0	0	0	42	42	31	42	43	0	dre_NK	transmembrane	adgrg1	adhesion G protein-coupled receptor G1 [Source:ZFIN;Acc:ZDB-GENE-030131-3671]
ENSDARG00000027249	0	70	64	67	66	49	58	60	62.5	65	65	81	85	0	79	78	84	No.Diff.Exp	non-transmembrane	btg1	B-cell translocation gene 1, anti-proliferative [Source:ZFIN;Acc:ZDB-GENE-010726-1]
ENSDARG00000027418	74	87	85	84	84	0	77	88	87	87	87	91	92	92	91	90	96	No.Diff.Exp	non-transmembrane	trappc4	trafficking protein particle complex 4 [Source:ZFIN;Acc:ZDB-GENE-040426-1734]
ENSDARG00000027564	0	1	37	36	37	37	35	37	37	38	38	55	56	35	56	0	37.3333	No.Diff.Exp	non-transmembrane	CABZ01052588.1
ENSDARG00000027590	0	0	77	78	79	70	62.5	79	80	80	81	86	86	85	83	85	88	No.Diff.Exp	non-transmembrane	2002-09-01	septin 2 [Source:ZFIN;Acc:ZDB-GENE-030131-911]
ENSDARG00000027595	0	0	0	0	0	0	0	0	0	0	0	0	0	0	0	0	47	No.Diff.Exp	transmembrane	selt1b	selenoprotein T, 1b [Source:ZFIN;Acc:ZDB-GENE-030411-1]
ENSDARG00000027649	70	81	86	79	76	63	57	87	87	88	88	88	88	87.5	86.5	87	92	No.Diff.Exp	non-transmembrane	cpsf3	cleavage and polyadenylation specific factor 3 [Source:ZFIN;Acc:ZDB-GENE-030131-3275]
ENSDARG00000027658	0	47	43	24	48	0	0	0	0	0	0	52	52	49	53	49	63	No.Diff.Exp	non-transmembrane	irf10	interferon regulatory factor 10 [Source:ZFIN;Acc:ZDB-GENE-040426-2084]
ENSDARG00000027734	53	71	68	69	68	69	46	68	68	69	69	83	81	62	75	71	80	No.Diff.Exp	non-transmembrane	srsf5b	serine/arginine-rich splicing factor 5b [Source:ZFIN;Acc:ZDB-GENE-040718-354]
ENSDARG00000027738	0	0	0	0	0	0	0	0	0	0	0	23	0	9.5	0	0	27	No.Diff.Exp	non-transmembrane	si:ch211-13c6.2	si:ch211-13c6.2 [Source:ZFIN;Acc:ZDB-GENE-060503-666]
ENSDARG00000027744	0	73	58	0	46	67	67	65	65	68	68	75	68.5	0	71	64	83	No.Diff.Exp	non-transmembrane	gadd45ba	growth arrest and DNA-damage-inducible, beta a [Source:ZFIN;Acc:ZDB-GENE-040426-1971]
ENSDARG00000027777	0	51	0	49	46	49	43	48	49	48	48	73	73	62	73	72	76	No.Diff.Exp	non-transmembrane	tnfaip3	tumor necrosis factor, alpha-induced protein 3 [Source:ZFIN;Acc:ZDB-GENE-100212-2]
ENSDARG00000027807	44	58	56	59	58	59	42	59	58	59	59	63	72	54	68	70	73	No.Diff.Exp	non-transmembrane	fynrk	fyn-related Src family tyrosine kinase [Source:ZFIN;Acc:ZDB-GENE-110411-7]
ENSDARG00000027825	57	92	89	92	93	93	50.3333	92	93.5	91	93	98	98	94	95	98	99	No.Diff.Exp	non-transmembrane	naa50	N(alpha)-acetyltransferase 50, NatE catalytic subunit [Source:ZFIN;Acc:ZDB-GENE-040801-142]
ENSDARG00000027899	68	62	71	74	75	62	0	74	74	61	0	76	0	75	76	76	76	No.Diff.Exp	non-transmembrane	shfm1	split hand/foot malformation (ectrodactyly) type 1 [Source:ZFIN;Acc:ZDB-GENE-030131-988]
ENSDARG00000027907	0	14.6	0	13	15.8	17.6667	14	16	15.3333	15.8182	17	41	40.5	28	0	34	41.7647	No.Diff.Exp	non-transmembrane	CR318603.2
ENSDARG00000027978	65	0	79	50	50	41.5	3	53.5	46.3333	53	56.3333	78	80	78.5	80	79	81	No.Diff.Exp	non-transmembrane	yy1b	YY1 transcription factor b [Source:ZFIN;Acc:ZDB-GENE-040426-2127]
ENSDARG00000028000	51.5	83	75	81	58	66	69	75	73	74	77	90	89	87	91	90	86	No.Diff.Exp	non-transmembrane	pfkpa	phosphofructokinase, platelet a [Source:ZFIN;Acc:ZDB-GENE-091112-22]
ENSDARG00000028086	31	49	47	48	48	49	48	49	48	49	49	58	57	59	59	54	70	No.Diff.Exp	non-transmembrane	zbtb2b	zinc finger and BTB domain containing 2b [Source:ZFIN;Acc:ZDB-GENE-040426-2753]
ENSDARG00000028099	12	61	56	58	60	58	54	57	57	57	57	68	73	49	61	42.5	58	No.Diff.Exp	non-transmembrane	sh2d3ca	SH2 domain containing 3Ca [Source:ZFIN;Acc:ZDB-GENE-080102-1]
ENSDARG00000028106	0	0	53	51	42	53	53	55	34.875	57	57	71	66	68	64	64	0	No.Diff.Exp	non-transmembrane	glrx	glutaredoxin (thioltransferase) [Source:ZFIN;Acc:ZDB-GENE-041010-11]
ENSDARG00000028119	0	86	0	96	95	0	0	97	96	95	95	97	98	97	95	96	99	No.Diff.Exp	non-transmembrane	sumo3a	small ubiquitin-like modifier 3a [Source:ZFIN;Acc:ZDB-GENE-040426-2133]
ENSDARG00000028198	0	45.5	90	91	94	93	58	92	61.5	92	94	94	94	85	85	85	0	No.Diff.Exp	non-transmembrane	ube2v2	ubiquitin-conjugating enzyme E2 variant 2 [Source:ZFIN;Acc:ZDB-GENE-040426-2919]
ENSDARG00000028275	0	0	0	0	0	0	0	0	0	0	0	64.4	64.25	59.75	58.6	65	72.5	No.Diff.Exp	non-transmembrane	sult1st1	sulfotransferase family 1, cytosolic sulfotransferase 1 [Source:ZFIN;Acc:ZDB-GENE-030131-2144]
ENSDARG00000028276	0	0	0	36	36	33	36	34	35	35	35	61	61	0	55	58	64	No.Diff.Exp	non-transmembrane
ENSDARG00000028295	5	31	30	31	0	0	0	0	0	0	0	29	31	22	0	15	42	No.Diff.Exp	non-transmembrane	mkrn4	makorin, ring finger protein, 4 [Source:ZFIN;Acc:ZDB-GENE-030131-5954]
ENSDARG00000028306	0	39	68	43	0	63	65	64	63	64	64	74	73	71	71	72	75	No.Diff.Exp	non-transmembrane	prph	peripherin [Source:ZFIN;Acc:ZDB-GENE-990415-207]
ENSDARG00000028335	0	0	0	0	0	0	0	0	0	0	0	0	0	0	0	0	0	No.Diff.Exp	non-transmembrane	hmga1a	high mobility group AT-hook 1a [Source:ZFIN;Acc:ZDB-GENE-010502-1]
ENSDARG00000028386	18	59	67	62	53	51	56	64	64	63	64	77	74	70	72	72	48	No.Diff.Exp	non-transmembrane	htatip2	HIV-1 Tat interactive protein 2 [Source:ZFIN;Acc:ZDB-GENE-001219-1]
ENSDARG00000028389	2	5	5	4	4	2	3	7	6	3	7	5	4	5	3.66667	4	7	No.Diff.Exp	non-transmembrane	rab44	RAB44, member RAS oncogene family [Source:ZFIN;Acc:ZDB-GENE-040724-117]
ENSDARG00000028475	0	72	73	77	71	72	55	78	78	76	78	82	82	82	81	80	91	No.Diff.Exp	non-transmembrane	lin9	lin-9 DREAM MuvB core complex component [Source:ZFIN;Acc:ZDB-GENE-030131-1747]
ENSDARG00000028542	0	0	0	0	0	0	0	0	0	0	0	35	37	22	0	33	63	No.Diff.Exp	non-transmembrane	si:ch211-114c12.2	si:ch211-114c12.2 [Source:ZFIN;Acc:ZDB-GENE-030131-8522]
ENSDARG00000028559	0	75	0	74	0	0	0	0	0	0	0	77	48	0	77	73	85	No.Diff.Exp	transmembrane	march5l	membrane-associated ring finger (C3HC4) 5, like [Source:ZFIN;Acc:ZDB-GENE-030131-4792]
ENSDARG00000028614	48	47	76	75	75	76	59.5	76	76	76	76	84	87	0	83	86	95	No.Diff.Exp	transmembrane	mospd1	motile sperm domain containing 1 [Source:ZFIN;Acc:ZDB-GENE-040426-2691]
ENSDARG00000028699	0	51	80	22	81	81	29	81	81	81	81	80.5	87	56	79	81	89	No.Diff.Exp	non-transmembrane	crkl	v-crk avian sarcoma virus CT10 oncogene homolog-like [Source:ZFIN;Acc:ZDB-GENE-040426-2951]
ENSDARG00000028721	79	86	70	87	87	68	68	91	90	91	91	90	90	85	91	30.5	91	No.Diff.Exp	non-transmembrane	mapk14b	mitogen-activated protein kinase 14b [Source:ZFIN;Acc:ZDB-GENE-021007-1]
ENSDARG00000028731	0	0	52	0	63	59	39	61	0	0	62	74	79	67	73	68	67	No.Diff.Exp	non-transmembrane	stat4	signal transducer and activator of transcription 4 [Source:ZFIN;Acc:ZDB-GENE-030616-264]
ENSDARG00000028748	69	93	53	91	91	89	60	92	92	91	92	94	94	92	94	86	93	dre_Tcell	transmembrane	tm9sf3	transmembrane 9 superfamily member 3 [Source:ZFIN;Acc:ZDB-GENE-040426-2714]
ENSDARG00000028780	0	40	31.3333	31.5	32.5	28	35	37	38	38	38	34.3333	32.6522	0	32	34	43	No.Diff.Exp	transmembrane	gzma	granzyme A [Source:ZFIN;Acc:ZDB-GENE-091204-156]
ENSDARG00000028889	25	65	65	55	52	54	56	56	56	54	54	70	71	62	69	69	0	No.Diff.Exp	non-transmembrane	ndufb10	NADH dehydrogenase (ubiquinone) 1 beta subcomplex, 10 [Source:ZFIN;Acc:ZDB-GENE-040426-1691]
ENSDARG00000029003	0	48	96	96	92	90	61	0	0	76	96.5	96	94	0	87	90	97	No.Diff.Exp	non-transmembrane	eif1axa	eukaryotic translation initiation factor 1A, X-linked, a [Source:ZFIN;Acc:ZDB-GENE-041010-185]
ENSDARG00000029058	92	76	80	96	97	80	97	97	95.5	0	97	99	99	97	99	99	100	No.Diff.Exp	non-transmembrane	rbbp4	retinoblastoma binding protein 4 [Source:ZFIN;Acc:ZDB-GENE-030131-445]
ENSDARG00000029064	0	70	62	61	63	57	51	60	59	54	54	76	0	78	71	76	77	No.Diff.Exp	non-transmembrane	uqcrq	ubiquinol-cytochrome c reductase, complex III subunit VII [Source:ZFIN;Acc:ZDB-GENE-040718-199]
ENSDARG00000029072	50	76	0	76	55	53	70	76	72	76	76	79	82	81	80	81	87	No.Diff.Exp	non-transmembrane	klf6a	Kruppel-like factor 6a [Source:ZFIN;Acc:ZDB-GENE-021115-9]
ENSDARG00000029150	56	92	90	90	90	82	66.5	91	91	91	91	92	92	93	89	86	96	No.Diff.Exp	non-transmembrane	hsp90ab1	heat shock protein 90, alpha (cytosolic), class B member 1 [Source:ZFIN;Acc:ZDB-GENE-990415-95]
ENSDARG00000029215	46	64	57	62	61	54	47	58	58	58	58	67	73	70	73	71	85	No.Diff.Exp	non-transmembrane	ube2z	ubiquitin-conjugating enzyme E2Z [Source:ZFIN;Acc:ZDB-GENE-040718-15]
ENSDARG00000029248	46	68	71	70	60	71	49	71	71	71	71	83	84	80	82	21	85	No.Diff.Exp	non-transmembrane	fubp1	far upstream element (FUSE) binding protein 1 [Source:ZFIN;Acc:ZDB-GENE-040426-2159]
ENSDARG00000029292	0	35	60	58	58	59	0	60	59	59	59	64	65	53	57	64	82	No.Diff.Exp	non-transmembrane	C2H1orf21 (1 of 2)	chromosome 1 open reading frame 21 [Source:HGNC Symbol;Acc:HGNC:15494]
ENSDARG00000029353	0	52	52	53	53	53	49	55	54	52	52	64	67	64	65	66	70	No.Diff.Exp	transmembrane	serpine2	serpin peptidase inhibitor, clade E (nexin, plasminogen activator inhibitor type 1), member 2 [Source:ZFIN;Acc:ZDB-GENE-040426-848]
ENSDARG00000029368	21	40	43	46	48	45	30	48	48	47	47	46	53	24	47	42	47	No.Diff.Exp	non-transmembrane	srpk2	SRSF protein kinase 2 [Source:ZFIN;Acc:ZDB-GENE-131105-1]
ENSDARG00000029370	37	54	42.5	52	51	44	42	51	50	51	51	60	57	0	12	53	66	No.Diff.Exp	non-transmembrane	ankrd6b	ankyrin repeat domain 6b [Source:ZFIN;Acc:ZDB-GENE-030916-4]
ENSDARG00000029402	35	59	52	63	0	59	53	61	61	49	62	61	63	62	59	48	65	No.Diff.Exp	transmembrane	sort1a	sortilin 1a [Source:ZFIN;Acc:ZDB-GENE-040426-2329]
ENSDARG00000029431	0	57	46	54	54	55	43	55	55	55	55	0	52	51	55	51	65	dre_NK	non-transmembrane	PRR5L	proline rich 5 like [Source:HGNC Symbol;Acc:HGNC:25878]
ENSDARG00000029445	86	93	96	88	97	96	65.6667	96	96	96	96	0	0	90	0	0	98	No.Diff.Exp	non-transmembrane	EIF1B	eukaryotic translation initiation factor 1B [Source:HGNC Symbol;Acc:HGNC:30792]
ENSDARG00000029474	50	79	82	70	78	76	63	77	77	76	76	0	0	0	0	0	89	dre_Myel	non-transmembrane	camk1b	calcium/calmodulin-dependent protein kinase Ib [Source:ZFIN;Acc:ZDB-GENE-141014-1]
ENSDARG00000029500	82	89.5	90	0	68	89	79	82.5	88.5	89	89	93	0	91	93	93	87	No.Diff.Exp	non-transmembrane	rpl34	ribosomal protein L34 [Source:ZFIN;Acc:ZDB-GENE-040426-1033]
ENSDARG00000029510	62	48	66	71	71	72	51	71	72	72	73	78	79	78	78	77	79	No.Diff.Exp	transmembrane	timm17a	translocase of inner mitochondrial membrane 17 homolog A (yeast) [Source:ZFIN;Acc:ZDB-GENE-031030-6]
ENSDARG00000029533	0	0	75	86	0	85	55	86	86	86	86	86	88	85	86	80	91	No.Diff.Exp	non-transmembrane	rpl18	ribosomal protein L18 [Source:ZFIN;Acc:ZDB-GENE-040801-165]
ENSDARG00000029621	17	68	58	67	67	67	32	68	67	67	67	0	0	0	0	0	32	dre_Tcell	transmembrane	sgms1	sphingomyelin synthase 1 [Source:ZFIN;Acc:ZDB-GENE-061103-295]
ENSDARG00000029639	0	80	82	68	85	84	66	81	73	83	83	91	91	91	87	91	86	No.Diff.Exp	transmembrane	tomm70a	translocase of outer mitochondrial membrane 70 homolog A (S. cerevisiae) [Source:ZFIN;Acc:ZDB-GENE-030131-8173]
ENSDARG00000029663	95	96	95	0	97	78	65	96	94	96	96	96	0	92	95	0	98	No.Diff.Exp	non-transmembrane	rab1ab	RAB1A, member RAS oncogene family b [Source:ZFIN;Acc:ZDB-GENE-030616-564]
ENSDARG00000029722	66	73	54	76	77	74	72	75	72.75	74	74	79	77	68	73	0	87	No.Diff.Exp	non-transmembrane	hmgb2a	high mobility group box 2a [Source:ZFIN;Acc:ZDB-GENE-051120-126]
ENSDARG00000029818	61	76	72	73	0	0	0	0	0	0	0	78	78	64	0	0	92	No.Diff.Exp	non-transmembrane	srsf5a	serine/arginine-rich splicing factor 5a [Source:ZFIN;Acc:ZDB-GENE-030131-7336]
ENSDARG00000029856	16	0	0	0	0	0	0	0	0	0	0	0	0	0	0	0	66	No.Diff.Exp	non-transmembrane	cnn3b	calponin 3, acidic b [Source:ZFIN;Acc:ZDB-GENE-050522-263]
ENSDARG00000029866	0	0	60	59	64	57	53	63	62	52	62	53	64	58	0	56.5	78	No.Diff.Exp	transmembrane	slc6a14	solute carrier family 6 (amino acid transporter), member 14 [Source:ZFIN;Acc:ZDB-GENE-130411-2]
ENSDARG00000029885	0	92	89	89	83	0	0	0	0	0	0	91	91	97	88	91	92	No.Diff.Exp	non-transmembrane	rab41	RAB41, member RAS oncogene family [Source:ZFIN;Acc:ZDB-GENE-040426-2686]
ENSDARG00000030006	0	0	70	68	62	40	41	44	44	45	44	79	78	65	69	69	84	No.Diff.Exp	transmembrane	SLC6A7	solute carrier family 6 (neurotransmitter transporter), member 7 [Source:HGNC Symbol;Acc:HGNC:11054]
ENSDARG00000030012	12.5	18	19	18	20	15	11	13	13	20	15	15	21	21	20	20	19	No.Diff.Exp	non-transmembrane	lrrfip1a	leucine rich repeat (in FLII) interacting protein 1a [Source:ZFIN;Acc:ZDB-GENE-030131-99]
ENSDARG00000030038	52	67	31	66	69	72	0	74	74	72	72	94	96	93	94	94	97	No.Diff.Exp	non-transmembrane	C20H12orf57	chromosome 12 open reading frame 57 [Source:HGNC Symbol;Acc:HGNC:29521]
ENSDARG00000030053	49	57	61	61	58	52	36	57	56	57	57	68	71	60	60	64	71	No.Diff.Exp	non-transmembrane	eef1db	eukaryotic translation elongation factor 1 delta b (guanine nucleotide exchange protein) [Source:ZFIN;Acc:ZDB-GENE-030131-6544]
ENSDARG00000030116	0	49	43	41	43	43	32	42	43	43	42	57	53	55	43.5	33	59	No.Diff.Exp	transmembrane	susd6	sushi domain containing 6 [Source:ZFIN;Acc:ZDB-GENE-030131-8832]
ENSDARG00000030153	0	65	60	63	53	38.5	48	64	64	65	65	72	74	62	71	71	67	No.Diff.Exp	transmembrane	gnptab	N-acetylglucosamine-1-phosphate transferase, alpha and beta subunits [Source:ZFIN;Acc:ZDB-GENE-030131-4714]
ENSDARG00000030154	50.5	89	89	88	89	90	80	90	90	90	90	93	94	94	92	93	96	No.Diff.Exp	non-transmembrane	pak7	p21 protein (Cdc42/Rac)-activated kinase 7 [Source:ZFIN;Acc:ZDB-GENE-040426-2085]
ENSDARG00000030155	0	59	73	75	67	66	67	83	77	73	83	78	83	69	59	83	56	No.Diff.Exp	non-transmembrane	ssbp3b	single stranded DNA binding protein 3b [Source:ZFIN;Acc:ZDB-GENE-040426-2801]
ENSDARG00000030156	49.5	48	57	56	0	54	42	55	55	55	55	67	75	71	72	11	78	No.Diff.Exp	transmembrane	naglu	N-acetylglucosaminidase, alpha [Source:ZFIN;Acc:ZDB-GENE-100726-2]
ENSDARG00000030166	47	42	52	56	49	50	49	53	54	42	56	62	64	59	65	0	59	No.Diff.Exp	transmembrane	hyi	hydroxypyruvate isomerase [Source:ZFIN;Acc:ZDB-GENE-040426-1273]
ENSDARG00000030213	81	91	88	87	79	60	53	85	85	87	87	93	93	90	94	93	96	No.Diff.Exp	non-transmembrane	sap30l	sap30-like [Source:ZFIN;Acc:ZDB-GENE-030131-5287]
ENSDARG00000030224	49	95	95.5	95.5	95.5	92.5	73	96	96.25	96	96	95	96	91.6667	95	94	0	No.Diff.Exp	non-transmembrane	ppp2ca	protein phosphatase 2, catalytic subunit, alpha isozyme [Source:ZFIN;Acc:ZDB-GENE-050417-441]
ENSDARG00000030236	60	79	76	61	75	53	65	69	69	70	70	78	79	81	81	76	85	No.Diff.Exp	transmembrane	tmem30aa	transmembrane protein 30Aa [Source:ZFIN;Acc:ZDB-GENE-040704-26]
ENSDARG00000030237	0	69	57	64	63	58	0	64	63	64	65	72	77	62	77	76	0	No.Diff.Exp	transmembrane	pgrmc2	progesterone receptor membrane component 2 [Source:ZFIN;Acc:ZDB-GENE-040426-2102]
ENSDARG00000030241	0	70.5	81	79	77	77	36	76	64	77	77	85	86	86	72	66	94	No.Diff.Exp	non-transmembrane	vbp1	von Hippel-Lindau binding protein 1 [Source:ZFIN;Acc:ZDB-GENE-050522-494]
ENSDARG00000030278	78	86	86	82	86	85	61.5	85	85	85	85	87	87	26	89	89	94	No.Diff.Exp	non-transmembrane	idh3a	isocitrate dehydrogenase 3 (NAD+) alpha [Source:ZFIN;Acc:ZDB-GENE-040426-1007]
ENSDARG00000030408	95	98	0	97	97	89	84.5	97	81.1429	97	97	0	0	0	0	0	98	No.Diff.Exp	non-transmembrane	rps26l	ribosomal protein S26, like [Source:ZFIN;Acc:ZDB-GENE-040426-1706]
ENSDARG00000030440	0	0	0	0	0	0	0	0	0	0	0	41	34	0	0	35	56	No.Diff.Exp	non-transmembrane	rsrp1	arginine/serine-rich protein 1 [Source:ZFIN;Acc:ZDB-GENE-060616-210]
ENSDARG00000030479	71.5	72	76	79	79	81	55.6	80	65.2941	66	81	0	0	0	0	0	91	No.Diff.Exp	non-transmembrane	hmgb1b	high mobility group box 1b [Source:ZFIN;Acc:ZDB-GENE-030131-8480]
ENSDARG00000030560	0	64	64	63	47	63	44	63	62	63	63	71	70	57	69	67	68	No.Diff.Exp	non-transmembrane	helz	helicase with zinc finger [Source:ZFIN;Acc:ZDB-GENE-040426-2419]
ENSDARG00000030602	78	85	83	0	0	81	0	81	76.7	81	81	84	85	82	68	39	87	No.Diff.Exp	non-transmembrane	rps19	ribosomal protein S19 [Source:ZFIN;Acc:ZDB-GENE-040426-1716]
ENSDARG00000030604	0	74	73	0	71	71	73	72	73	73	73	85	73	83	84	83	32.5	No.Diff.Exp	non-transmembrane	phkg1a	phosphorylase kinase, gamma 1a (muscle) [Source:ZFIN;Acc:ZDB-GENE-061103-385]
ENSDARG00000030608	0	90	89	87	89	0	0	0	0	0	0	88	89	78	90	89	91	No.Diff.Exp	non-transmembrane	rhogd	ras homolog gene family, member Gd [Source:ZFIN;Acc:ZDB-GENE-040426-1504]
ENSDARG00000030723	0	42	31	39	41	25	41	41	41	39	40	39	40	40	39	38	50	No.Diff.Exp	transmembrane	cldn11b	claudin 11b [Source:ZFIN;Acc:ZDB-GENE-010328-13]
ENSDARG00000030753	0	49	38	46	44	42	43	41	40	45	45	52	55	50	52	51	54	No.Diff.Exp	transmembrane	prrg4	proline rich Gla (G-carboxyglutamic acid) 4 (transmembrane) [Source:ZFIN;Acc:ZDB-GENE-050417-112]
ENSDARG00000030789	57	71	40	73	72	72	63	72	72	72	72	75	78	71	77	76	80	No.Diff.Exp	non-transmembrane	ddx18	DEAD (Asp-Glu-Ala-Asp) box polypeptide 18 [Source:ZFIN;Acc:ZDB-GENE-030131-9685]
ENSDARG00000030824	43	55	57	20	14	51	34	55	52	0	55	59	62	48	63	56	65	No.Diff.Exp	transmembrane	esyt2a	extended synaptotagmin-like protein 2a [Source:ZFIN;Acc:ZDB-GENE-070912-588]
ENSDARG00000030839	0	53	58	52	53	45	57	50.5	49	55	55	61	75	44	66	70	82	No.Diff.Exp	non-transmembrane	tescb	tescalcin b [Source:ZFIN;Acc:ZDB-GENE-040426-1903]
ENSDARG00000030844	35	45	48	47	44	47	45	45	46	44	44	54	55	49	51	45	74	No.Diff.Exp	non-transmembrane	klf11a	Kruppel-like factor 11a [Source:ZFIN;Acc:ZDB-GENE-030131-3568]
ENSDARG00000030938	0	65	60	8	0	63	57	63	63	64	64	78	78	75	76	35.5	85	dre_NK	non-transmembrane	fermt3b	fermitin family member 3b [Source:ZFIN;Acc:ZDB-GENE-040426-1366]
ENSDARG00000030949	0	0	0	0	58	48	32	56	0	56	56	67	69	64	67	66	38	No.Diff.Exp	transmembrane	srprb	signal recognition particle receptor, B subunit [Source:ZFIN;Acc:ZDB-GENE-040718-311]
ENSDARG00000030964	0	60	45	51	55	57	53	57	52	58	57	59	58	54	57	56	47	No.Diff.Exp	non-transmembrane	pde12	phosphodiesterase 12 [Source:ZFIN;Acc:ZDB-GENE-060519-25]
ENSDARG00000031100	22	72	74	77	71	72	46	77	77	77	78	81	82	79	83	83	89	No.Diff.Exp	non-transmembrane	ivns1abpa	influenza virus NS1A binding protein a [Source:ZFIN;Acc:ZDB-GENE-031222-2]
ENSDARG00000031108	17	45	68	70	70	67	42	70	68	70	70	77	79	73	76	76	67	dre_Tcell	non-transmembrane	lrba	LPS-responsive vesicle trafficking, beach and anchor containing [Source:ZFIN;Acc:ZDB-GENE-090311-19]
ENSDARG00000031150	0	57	60	59	0	49	43	0	52	0	52	64	66	36	66	36	72	No.Diff.Exp	non-transmembrane	gba3	glucosidase, beta, acid 3 (gene/pseudogene) [Source:ZFIN;Acc:ZDB-GENE-050522-351]
ENSDARG00000031200	76.5	88	82	86	79	80	54	78	80	79	80	89	81	53	89	90	0	No.Diff.Exp	non-transmembrane	ppp2r5cb	protein phosphatase 2, regulatory subunit B', gamma b [Source:ZFIN;Acc:ZDB-GENE-041014-4]
ENSDARG00000031216	73.5	90	88	89	90	90	90	89	89	89	89	92	93	91	91	91	70	No.Diff.Exp	non-transmembrane	ssu72	SSU72 RNA polymerase II CTD phosphatase homolog (S. cerevisiae) [Source:ZFIN;Acc:ZDB-GENE-040426-1689]
ENSDARG00000031302	48	65	60	60	59	58	48	57	57	52	59	53	56	21	53	49	30	No.Diff.Exp	non-transmembrane	smap1	small ArfGAP 1 [Source:ZFIN;Acc:ZDB-GENE-060920-2]
ENSDARG00000031317	0	63	60	63	54	57	51	52	51	56	55	70	74	71	68	38	84	dre_Myel	non-transmembrane	ppdpfb	pancreatic progenitor cell differentiation and proliferation factor b [Source:ZFIN;Acc:ZDB-GENE-030131-8247]
ENSDARG00000031343	0	82	76	0	0	74	75	90	90	0	90	93	92	76	93	93	96	dre_Tcell	non-transmembrane	rab6bb	RAB6B, member RAS oncogene family b [Source:ZFIN;Acc:ZDB-GENE-050320-28]
ENSDARG00000031372	0	39	59	39	0	48	0	57	57	49	55	70	59	57	58	59	82	No.Diff.Exp	transmembrane	efna2a	ephrin-A2a [Source:ZFIN;Acc:ZDB-GENE-990415-66]
ENSDARG00000031388	54	38	69	72	25	69	64	68	68	70	71	84	85	79	86	84	86	No.Diff.Exp	non-transmembrane	dctn2	dynactin 2 (p50) [Source:ZFIN;Acc:ZDB-GENE-040426-1279]
ENSDARG00000031427	99	0	0	0	0	0	0	0	0	0	0	0	0	0	100	0	0	No.Diff.Exp	non-transmembrane	calm2a	calmodulin 2a (phosphorylase kinase, delta) [Source:ZFIN;Acc:ZDB-GENE-030804-3]
ENSDARG00000031435	44	56	58	54	54	50	56	51.5	50.5	50.5	51	54.5	52.3333	44	55	54	87	No.Diff.Exp	non-transmembrane	zgc:56493	zgc:56493 [Source:ZFIN;Acc:ZDB-GENE-030131-8581]
ENSDARG00000031494	0	39	33	36	0	29	32	37	37	37	37	54	0	9	36	21	73	No.Diff.Exp	non-transmembrane	prrc2a	proline-rich coiled-coil 2A [Source:ZFIN;Acc:ZDB-GENE-010501-4]
ENSDARG00000031495	0	58	90	27	92	86	71	85	76	85	83	0	0	74	0	0	96	No.Diff.Exp	non-transmembrane	seta	SET translocation (myeloid leukemia-associated) A [Source:ZFIN;Acc:ZDB-GENE-030131-2221]
ENSDARG00000031496	0	41	41	57	59	53	41	57	58	57	57	68	69	64	0	0	76	No.Diff.Exp	non-transmembrane	ap1ar	adaptor-related protein complex 1 associated regulatory protein [Source:ZFIN;Acc:ZDB-GENE-130530-580]
ENSDARG00000031511	60	86	72	84	84	74	72	82	82	82	82	90	93	54	88	46	94	No.Diff.Exp	non-transmembrane	psmb2	proteasome (prosome, macropain) subunit, beta type, 2 [Source:ZFIN;Acc:ZDB-GENE-040718-353]
ENSDARG00000031637	64	75	75	73	72	68	54	75	71	76	76	86	87	78	77	75	89	No.Diff.Exp	non-transmembrane	pan3	PAN3 poly(A) specific ribonuclease subunit homolog (S. cerevisiae) [Source:ZFIN;Acc:ZDB-GENE-070928-13]
ENSDARG00000031680	45	0	45	40	0	48	27	49	50	50	48	60	61	50	57	59	65	No.Diff.Exp	non-transmembrane	ercc1	excision repair cross-complementation group 1 [Source:ZFIN;Acc:ZDB-GENE-040426-2606]
ENSDARG00000031731	0	0	0	0	0	0	0	0	0	0	0	0	0	0	0	0	0	No.Diff.Exp	transmembrane	si:ch73-27e22.6	si:ch73-27e22.6 [Source:ZFIN;Acc:ZDB-GENE-070705-234]
ENSDARG00000031745	0	30	19	21.5	22	25.6667	26.1667	29	28.2	31	31.2	41.25	41.6429	0	40.6667	43	53	dre_Myel	transmembrane	zgc:103599	zgc:103599 [Source:ZFIN;Acc:ZDB-GENE-041010-50]
ENSDARG00000031756	20	70	71	66	68	62	61	67	71	68	71	83	84	76	82	55	46	No.Diff.Exp	non-transmembrane	mef2aa	myocyte enhancer factor 2aa [Source:ZFIN;Acc:ZDB-GENE-990415-163]
ENSDARG00000031774	0	66	67	68	68	67	46	69	69	68	68	69	71	72	70	70	75	No.Diff.Exp	non-transmembrane	pus7	pseudouridylate synthase 7 (putative) [Source:ZFIN;Acc:ZDB-GENE-060620-1]
ENSDARG00000031776	60.25	72	0	0	0	0	0	0	0	0	0	0	79.5	64	83	82	68.6667	No.Diff.Exp	transmembrane	zgc:92066	zgc:92066 [Source:ZFIN;Acc:ZDB-GENE-040718-72]
ENSDARG00000031795	19	69	65	65	0	66	60	68	68	69	70	72	73	71	71	17	67	No.Diff.Exp	non-transmembrane	abcf1	ATP-binding cassette, sub-family F (GCN20), member 1 [Source:ZFIN;Acc:ZDB-GENE-050517-31]
ENSDARG00000031819	0	79	73	73	51	73	43	73	72	74	74	84	86	82	84	0	91	No.Diff.Exp	non-transmembrane	eif4ebp2	eukaryotic translation initiation factor 4E binding protein 2 [Source:ZFIN;Acc:ZDB-GENE-031118-83]
ENSDARG00000031885	0	0	0	0	0	0	0	0	0	0	0	76	79	50	72	79	82	No.Diff.Exp	non-transmembrane	psmb12	proteasome (prosome, macropain) subunit, beta type, 12 [Source:ZFIN;Acc:ZDB-GENE-001208-1]
ENSDARG00000031985	0	73	65	66	82	73	53	80	80	81	81	84	89	81	81	59	42	No.Diff.Exp	non-transmembrane	ppp2r4	protein phosphatase 2A activator, regulatory subunit 4 [Source:ZFIN;Acc:ZDB-GENE-040801-11]
ENSDARG00000032013	74	95	95	94	94	95	54	95	95	95	94	93.5	93.5	93	93	93	94	No.Diff.Exp	non-transmembrane	pafah1b1a	platelet-activating factor acetylhydrolase 1b, regulatory subunit 1a [Source:ZFIN;Acc:ZDB-GENE-040116-2]
ENSDARG00000032129	61	68	68	71	0	38	69	68	68	70	70	82	84	72	55.5	74	88	No.Diff.Exp	non-transmembrane	gtf2f1	general transcription factor IIF, polypeptide 1 [Source:ZFIN;Acc:ZDB-GENE-030131-4557]
ENSDARG00000032155	68	84	84	82	84	80	72	81	80	80	80	86	86	85	83	84	0	dre_NK	non-transmembrane	ppm1aa	protein phosphatase, Mg2+/Mn2+ dependent, 1Aa [Source:ZFIN;Acc:ZDB-GENE-991102-15]
ENSDARG00000032175	25	56	82	83	74	82	53	84	84	83	83	78	79	0	78	76	80	dre_Tcell	non-transmembrane	puf60a	poly-U binding splicing factor a [Source:ZFIN;Acc:ZDB-GENE-030131-2891]
ENSDARG00000032296	55	82	73	65	73	63	59	75	77	76	76	88	85	84	85	58	89	No.Diff.Exp	non-transmembrane	pomp	proteasome maturation protein [Source:ZFIN;Acc:ZDB-GENE-040801-10]
ENSDARG00000032317	34	48	58	62	63	61	57	63	63	63	63	42	45	27	0	0	56	No.Diff.Exp	non-transmembrane	tox	thymocyte selection-associated high mobility group box [Source:ZFIN;Acc:ZDB-GENE-070912-181]
ENSDARG00000032327	9	49	30	48	36	44	52	50	47	47	51	56	51	50	56	56	16	No.Diff.Exp	non-transmembrane	usp36	ubiquitin specific peptidase 36 [Source:ZFIN;Acc:ZDB-GENE-030131-5450]
ENSDARG00000032373	47	77	75	77	21	59	35	76	76	76	76	79	79	78	79	79	82	No.Diff.Exp	transmembrane	rnf145b	ring finger protein 145b [Source:ZFIN;Acc:ZDB-GENE-030131-5264]
ENSDARG00000032430	86	93	86	88	0	89	74	88	88	88	88	95	95	96	95	56	97	No.Diff.Exp	non-transmembrane	ppp2r1b	protein phosphatase 2, regulatory subunit A, beta [Source:ZFIN;Acc:ZDB-GENE-040927-20]
ENSDARG00000032469	0	73	67	71	71	71	55	71	72	71	71	80	79	75	76	33	86	No.Diff.Exp	non-transmembrane	ampd3b	adenosine monophosphate deaminase 3b [Source:ZFIN;Acc:ZDB-GENE-030131-5929]
ENSDARG00000032496	0	50	50	51	51	47.6667	39.3333	49.3333	49	51	50	53.5	51	34	56	56	59	No.Diff.Exp	non-transmembrane	pon1	paraoxonase 1 [Source:ZFIN;Acc:ZDB-GENE-040912-6]
ENSDARG00000032575	73	0	0	0	0	0	0	0	0	0	0	75	77	70	0	0	91	No.Diff.Exp	non-transmembrane	ywhaz	tyrosine 3-monooxygenase/tryptophan 5-monooxygenase activation protein, zeta polypeptide [Source:ZFIN;Acc:ZDB-GENE-030131-8554]
ENSDARG00000032601	0	0	0	0	0	25	17	27	0	27	27	24	0	13	0	0	0	No.Diff.Exp	non-transmembrane	macrod2	MACRO domain containing 2 [Source:ZFIN;Acc:ZDB-GENE-040426-1490]
ENSDARG00000032606	0	90	82	90	93	82	66.5	87	88	88	88	98	94	89	85	95	97	dre_NK	non-transmembrane	sept8a	septin 8a [Source:ZFIN;Acc:ZDB-GENE-030131-309]
ENSDARG00000032619	0	86	73	86	85	83	85	84	85	85	85	88	90	57	85	86	93	No.Diff.Exp	non-transmembrane	tob1a	transducer of ERBB2, 1a [Source:ZFIN;Acc:ZDB-GENE-031030-4]
ENSDARG00000032651	0	53	58	58	0	59	5	58	57	59	59	70	58	60	66	60	85	No.Diff.Exp	non-transmembrane	ppp1r10	protein phosphatase 1, regulatory subunit 10 [Source:ZFIN;Acc:ZDB-GENE-020419-15]
ENSDARG00000032725	72	98	90	97	98	99	99	73.5	91.2	98.5	99	100	100	100	100	88	100	No.Diff.Exp	non-transmembrane	rps27a	ribosomal protein S27a [Source:ZFIN;Acc:ZDB-GENE-030131-10018]
ENSDARG00000032802	19	40	38	38	40	41	29	40	39	41	41	53	59	48	54	51	66	No.Diff.Exp	transmembrane	ktn1	kinectin 1 [Source:ZFIN;Acc:ZDB-GENE-030408-4]
ENSDARG00000032849	24	66	59	65	66	50	50	64	64	65	65	73	78	63	76	71	81	No.Diff.Exp	non-transmembrane	ndrg1a	N-myc downstream regulated 1a [Source:ZFIN;Acc:ZDB-GENE-030826-34]
ENSDARG00000032859	46	68	64	65	66	59	0	65	65	66	66	69.5	74	65	72	0	66	No.Diff.Exp	non-transmembrane	fam84b	family with sequence similarity 84, member B [Source:ZFIN;Acc:ZDB-GENE-060929-1130]
ENSDARG00000032866	89	98	98	98	98	99	98	99	98	99	99	98	97	98	98	98	100	No.Diff.Exp	non-transmembrane	erh	enhancer of rudimentary homolog (Drosophila) [Source:ZFIN;Acc:ZDB-GENE-990415-57]
ENSDARG00000032868	30.5	75	73	73	57	61	62	75	74	73	80	62	79	70	79	79	64	No.Diff.Exp	non-transmembrane	pde4ba	phosphodiesterase 4B, cAMP-specific a [Source:ZFIN;Acc:ZDB-GENE-030131-9570]
ENSDARG00000032876	46	61	55	52	53	57	50	58	57	57	57	65	65	62	64	64	68	No.Diff.Exp	non-transmembrane	trit1	tRNA isopentenyltransferase 1 [Source:ZFIN;Acc:ZDB-GENE-060503-297]
ENSDARG00000032970	0	59	62	63	60	58	0	57	59	63	63	76	79	77	78	50	82	No.Diff.Exp	transmembrane	cox4i1	cytochrome c oxidase subunit IV isoform 1 [Source:ZFIN;Acc:ZDB-GENE-030131-5175]
ENSDARG00000032985	0	66	64	64	0	59	57	61	62	64	64	64	68	65	64	65	68	No.Diff.Exp	non-transmembrane	mrpl27	mitochondrial ribosomal protein L27 [Source:ZFIN;Acc:ZDB-GENE-050522-129]
ENSDARG00000032997	0	80	51	0	84	87	37	86	86	87	87	84	84	82	0	83	86	No.Diff.Exp	transmembrane	rnf185	ring finger protein 185 [Source:ZFIN;Acc:ZDB-GENE-040426-1977]
ENSDARG00000033009	0	100	100	0	100	0	0	100	100	100	0	100	100	100	100	100	100	No.Diff.Exp	non-transmembrane	h3f3b.1	H3 histone, family 3B.1 [Source:ZFIN;Acc:ZDB-GENE-050417-65]
ENSDARG00000033042	3	12	10	27	23	20	22	24	24	25	25	0	0	0	0	0	49	No.Diff.Exp	transmembrane	ptprja	protein tyrosine phosphatase, receptor type, J a [Source:ZFIN;Acc:ZDB-GENE-030131-8301]
ENSDARG00000033046	24	40	35	39	39	26	0	0	0	29	29	45	45	41	46	41	48	No.Diff.Exp	non-transmembrane	ccni2	cyclin I family, member 2 [Source:ZFIN;Acc:ZDB-GENE-081106-2]
ENSDARG00000033099	45	62	55	57	59	27	34	56	56	36	57	71	71	61	71	64	81	No.Diff.Exp	non-transmembrane	kif7	kinesin family member 7 [Source:ZFIN;Acc:ZDB-GENE-050307-1]
ENSDARG00000033138	0	0	55	49	59	61	58	66	63	56	64	0	0	0	0	52	70	No.Diff.Exp	non-transmembrane	lyrm2	LYR motif containing 2 [Source:ZFIN;Acc:ZDB-GENE-040914-27]
ENSDARG00000033144	0	67	50	57	0	63	25	63	62	63	63	78	79	75	76	73	53	No.Diff.Exp	non-transmembrane	psme2	proteasome (prosome, macropain) activator subunit 2 (PA28 beta) [Source:ZFIN;Acc:ZDB-GENE-991110-16]
ENSDARG00000033175	85	91	92	91	91	0	62	91	89.5	91	91	89	0	96	96	97	99	No.Diff.Exp	non-transmembrane	snrpe	small nuclear ribonucleoprotein polypeptide E [Source:ZFIN;Acc:ZDB-GENE-040426-1112]
ENSDARG00000033184	0	75	75	60	75	60	38	70	70	69	70	85	86	79	85	78	81	No.Diff.Exp	non-transmembrane	prkar2aa	protein kinase, cAMP-dependent, regulatory, type II, alpha A [Source:ZFIN;Acc:ZDB-GENE-030131-1007]
ENSDARG00000033364	0	0	49	0	0	0	0	0	0	0	0	71	74	76	72	75	75	No.Diff.Exp	transmembrane	zgc:158387	zgc:158387 [Source:ZFIN;Acc:ZDB-GENE-061215-48]
ENSDARG00000033437	22	78	77	51	82	66	80	81	80	81	81	88	88	72	87	88	17	No.Diff.Exp	non-transmembrane	rps6ka1	ribosomal protein S6 kinase a, polypeptide 1 [Source:ZFIN;Acc:ZDB-GENE-060929-516]
ENSDARG00000033440	68	0	79	84	73	74	0	83	82	83	83	82	87	82	63	84	89	No.Diff.Exp	non-transmembrane	metap1	methionyl aminopeptidase 1 [Source:ZFIN;Acc:ZDB-GENE-050626-124]
ENSDARG00000033444	0	0	0	0	0	47	46	54	49	54	54	0	0	0	0	0	0	No.Diff.Exp	non-transmembrane	map4k6	mitogen-activated protein kinase kinase kinase kinase 6 [Source:ZFIN;Acc:ZDB-GENE-060512-339]
ENSDARG00000033450	48	59	58	54	57	48.5	40.5	56.5	52	55	58.5	74	73	59	70	57	75	No.Diff.Exp	non-transmembrane	nkap	NFKB activating protein [Source:ZFIN;Acc:ZDB-GENE-030131-8064]
ENSDARG00000033466	0	49	62	57	63	65	36	64	65	64	64	70	75	46	0	0	81	No.Diff.Exp	non-transmembrane	tagln2	transgelin 2 [Source:ZFIN;Acc:ZDB-GENE-020802-2]
ENSDARG00000033489	0	65	61	64	65	64	0	67	54	68	68	70	71	28	67	18.5	68	No.Diff.Exp	transmembrane	ube2j1	ubiquitin-conjugating enzyme E2, J1 [Source:ZFIN;Acc:ZDB-GENE-040426-2853]
ENSDARG00000033596	69	87	79	74.5	91	76	84	90	90	90	90	96	94	95	94	94	96	dre_NK	non-transmembrane	polr2c	polymerase (RNA) II (DNA directed) polypeptide C [Source:ZFIN;Acc:ZDB-GENE-030131-6609]
ENSDARG00000033597	67	83	78	82	80	79	0	79	79	82	82	86	87	86	87	86	93	No.Diff.Exp	non-transmembrane	api5	apoptosis inhibitor 5 [Source:ZFIN;Acc:ZDB-GENE-030131-395]
ENSDARG00000033647	87	95	95	64	95	95	58	96	95	96	96	92	93	92	94	93	0	No.Diff.Exp	non-transmembrane	smarcb1a	SWI/SNF related, matrix associated, actin dependent regulator of chromatin, subfamily b, member 1a [Source:ZFIN;Acc:ZDB-GENE-041114-5]
ENSDARG00000033738	52	34	48	56	0	57.5	59	58	56	58	58	0	0	0	68	54	0	dre_Myel	non-transmembrane	zgc:153867	zgc:153867 [Source:ZFIN;Acc:ZDB-GENE-030131-9170]
ENSDARG00000033789	63	52	55	64	0	27	43	58	58	58	59	73	71	71	72	68	79	No.Diff.Exp	non-transmembrane	ndufb7	NADH dehydrogenase (ubiquinone) 1 beta subcomplex, 7 [Source:ZFIN;Acc:ZDB-GENE-040426-1886]
ENSDARG00000033855	0	96	96	96	74	95	79	96	96	96	96	96	97	94	98	96	99	No.Diff.Exp	non-transmembrane	rqcd1	RCD1 required for cell differentiation1 homolog (S. pombe) [Source:ZFIN;Acc:ZDB-GENE-030131-1558]
ENSDARG00000033928	0	62	73	75	74	70	66	70	70	71	71	80	81	56	38	55	81	No.Diff.Exp	transmembrane	ndfip2	Nedd4 family interacting protein 2 [Source:ZFIN;Acc:ZDB-GENE-040426-2662]
ENSDARG00000033950	0	56	55	54	0	0	0	0	0	0	0	65	66	0	62	61	69	dre_Myel	transmembrane	lamb2l	laminin, beta 2-like [Source:ZFIN;Acc:ZDB-GENE-030131-4205]
ENSDARG00000033963	0	0	0	0	0	0	0	0	0	0	0	0	0	0	0	0	25.1	dre_NK	transmembrane	nitr1j_2	novel immune-type receptor 1j (nitr1j), mRNA [Source:RefSeq mRNA;Acc:NM_001011881]
ENSDARG00000034056	48	86	77	34.5	75	82	84	83	82	47.5	83	94	87	83.5	94	87	76	No.Diff.Exp	non-transmembrane	csnk1g2b	casein kinase 1, gamma 2b [Source:ZFIN;Acc:ZDB-GENE-060825-285]
ENSDARG00000034086	0	0	0	0	0	0	0	0	0	0	0	0	0	0	0	0	58	No.Diff.Exp	non-transmembrane	zgc:65895	zgc:65895 [Source:ZFIN;Acc:ZDB-GENE-040426-1466]
ENSDARG00000034098	0	0	0	0	0	0	0	0	0	0	0	20	26.2	14.1667	12	19	29.25	No.Diff.Exp	transmembrane	CABZ01058865.1
ENSDARG00000034173	28	69	60	55	74	66	52	73	73	74	73	80	81	76	78	78	90	dre_Tcell	non-transmembrane	prkcq	protein kinase C, theta [Source:ZFIN;Acc:ZDB-GENE-041210-195]
ENSDARG00000034187	99	100	0	99	0	0	0	0	0	100	0	0	0	0	0	0	0	No.Diff.Exp	non-transmembrane	calm1b	calmodulin 1b [Source:ZFIN;Acc:ZDB-GENE-030804-2]
ENSDARG00000034195	16	71	66	73	74	73	45	72	0	73	73	78	79	72	79	76	32	No.Diff.Exp	non-transmembrane	top2b	topoisomerase (DNA) II beta [Source:ZFIN;Acc:ZDB-GENE-041008-136]
ENSDARG00000034240	67	48	81	37.5	36	34	0	35	35	35	35	0	86	88	45	70	87	No.Diff.Exp	non-transmembrane	capza1a	capping protein (actin filament) muscle Z-line, alpha 1a [Source:ZFIN;Acc:ZDB-GENE-030131-5237]
ENSDARG00000034270	57	53	83	85	84	77	69	82	83	85	84	80	78	66	77	70	0	No.Diff.Exp	non-transmembrane	ogdha	oxoglutarate (alpha-ketoglutarate) dehydrogenase a (lipoamide) [Source:ZFIN;Acc:ZDB-GENE-030131-2143]
ENSDARG00000034291	84	84.5	93	94	94	81	82	93	89.2857	93	93	92	94	93	91	90	99	No.Diff.Exp	non-transmembrane	rpl37	ribosomal protein L37 [Source:ZFIN;Acc:ZDB-GENE-040625-39]
ENSDARG00000034293	41	61	60	62	63	61	42	60	60	61	61	0	0	0	0	0	84	No.Diff.Exp	non-transmembrane	hif1ab	hypoxia inducible factor 1, alpha subunit (basic helix-loop-helix transcription factor) b [Source:ZFIN;Acc:ZDB-GENE-040426-706]
ENSDARG00000034326	22	85	74	84	77	81	72	82	82	83	83	88	87	83	88	65.5	93	No.Diff.Exp	non-transmembrane	ing3	inhibitor of growth family, member 3 [Source:ZFIN;Acc:ZDB-GENE-040109-3]
ENSDARG00000034368	55	65	64	57	63	50	46	56	51	56	57	71	70	65	73	70	74	No.Diff.Exp	transmembrane	hexb	hexosaminidase B (beta polypeptide) [Source:ZFIN;Acc:ZDB-GENE-030131-2333]
ENSDARG00000034427	0	43	28	36	28	37	33	37	36.5	39	39	54	56	35	51	51	61	No.Diff.Exp	non-transmembrane	hn1l	hematological and neurological expressed 1-like [Source:ZFIN;Acc:ZDB-GENE-030131-599]
ENSDARG00000034473	14	72	69	68	70	69	38	69	68	70	70	75	77	75	73	75	78	No.Diff.Exp	transmembrane	ttyh3a	tweety family member 3a [Source:ZFIN;Acc:ZDB-GENE-120508-1]
ENSDARG00000034497	63	89	85	39	0	0	81	85	0	82	86	90	91	89	89	0	93	No.Diff.Exp	non-transmembrane	fbxl14a	F-box and leucine-rich repeat protein 14a [Source:ZFIN;Acc:ZDB-GENE-030131-5920]
ENSDARG00000034534	0	93	85	92	93	89	71	93	93	92	93	95	95	83.5	93	95	97	No.Diff.Exp	non-transmembrane	atp6v1aa	ATPase, H+ transporting, lysosomal, V1 subunit Aa [Source:ZFIN;Acc:ZDB-GENE-040426-1143]
ENSDARG00000034616	0	44	48	53	52	55	53	55	55	54	54	74	0	74	46	70	75	No.Diff.Exp	non-transmembrane	mlf2	myeloid leukemia factor 2 [Source:ZFIN;Acc:ZDB-GENE-050913-67]
ENSDARG00000034670	58	80	80	81	81	78	67	81	76	81	81	88.5	96	95	80	94	98	No.Diff.Exp	non-transmembrane	ube2e2	ubiquitin-conjugating enzyme E2E 2 [Source:ZFIN;Acc:ZDB-GENE-040801-237]
ENSDARG00000034714	0	54	52	48	0	46	54	53	51	53	53	70	71	68	71	71	52	No.Diff.Exp	transmembrane	esyt1a	extended synaptotagmin-like protein 1a [Source:ZFIN;Acc:ZDB-GENE-090311-55]
ENSDARG00000034753	51	88	78	88	89	87	68	85	85	87	87	85	85	75	79	80	66	No.Diff.Exp	transmembrane	tspan3a	tetraspanin 3a [Source:ZFIN;Acc:ZDB-GENE-030131-7787]
ENSDARG00000034777	55	39	55	55	48	56	0	55	57	0	56	69	72	69	59	0	77	No.Diff.Exp	non-transmembrane	txn2	thioredoxin 2 [Source:ZFIN;Acc:ZDB-GENE-040426-1795]
ENSDARG00000034823	84	85	86	88	88	15.5	13.5	87	87	26	88	96	97	88	96	95	42.5	No.Diff.Exp	non-transmembrane	copg2	coatomer protein complex, subunit gamma 2 [Source:ZFIN;Acc:ZDB-GENE-000208-8]
ENSDARG00000034825	0	22	20	21	22	24	13	23	22	24	24	25	29	18	27	13	32	No.Diff.Exp	non-transmembrane	uspl1	ubiquitin specific peptidase like 1 [Source:ZFIN;Acc:ZDB-GENE-040930-7]
ENSDARG00000034893	43.5	80	78	83	55	68	53	83	83	78	83	88	88	48	88	80	81	No.Diff.Exp	non-transmembrane	rarab	retinoic acid receptor, alpha b [Source:ZFIN;Acc:ZDB-GENE-980526-72]
ENSDARG00000034897	88	95	92	85	92	84	71	90	76.25	85	89.5	97	98	81	95	95	99	No.Diff.Exp	non-transmembrane	rps10	ribosomal protein S10 [Source:ZFIN;Acc:ZDB-GENE-040426-1481]
ENSDARG00000035023	0	38	0	61	61	61	55	61	56	61	61	67	66	61	63	64	70	No.Diff.Exp	non-transmembrane	kiaa0907	KIAA0907 protein [Source:ZFIN;Acc:ZDB-GENE-030131-405]
ENSDARG00000035043	0	78	75	0	0	79	78	79	80	79	79	60	0	86	78	81	93	No.Diff.Exp	non-transmembrane	pfdn5	prefoldin 5 [Source:ZFIN;Acc:ZDB-GENE-030131-6858]
ENSDARG00000035054	52	93	81	94	94	94	94	94	94	94	94	0	71	84	0	0	82	No.Diff.Exp	non-transmembrane	pdcd10a	programmed cell death 10a [Source:ZFIN;Acc:ZDB-GENE-040426-1432]
ENSDARG00000035066	41.5	63	56	65	17	65	37	43	66	50	43.5	74	77	67	77	75	16	No.Diff.Exp	non-transmembrane	ubtf	upstream binding transcription factor, RNA polymerase I [Source:ZFIN;Acc:ZDB-GENE-030616-252]
ENSDARG00000035129	0	69	74	0	0	0	0	0	0	0	0	85	87	80	82	81	0	No.Diff.Exp	non-transmembrane	zgc:101858	zgc:101858 [Source:ZFIN;Acc:ZDB-GENE-040927-13]
ENSDARG00000035133	0	0	0	0	0	0	0	0	0	0	0	0	0	0	0	0	17	No.Diff.Exp	non-transmembrane	pho	phoenix [Source:ZFIN;Acc:ZDB-GENE-030131-5935]
ENSDARG00000035136	0	0	0	52	0	55	45	52.5	53.6667	48	51	0	0	0	0	0	0	No.Diff.Exp	non-transmembrane	sepw1	selenoprotein W, 1 [Source:ZFIN;Acc:ZDB-GENE-030410-5]
ENSDARG00000035146	0	50	96	86	95	73	0	96	96	72	87.75	97	97	97	97	96	99	No.Diff.Exp	non-transmembrane	polr2j	polymerase (RNA) II (DNA directed) polypeptide J [Source:ZFIN;Acc:ZDB-GENE-050522-120]
ENSDARG00000035161	0	61	57	41	49	37	39	55	41	57	57	0	0	0	0	0	62	No.Diff.Exp	transmembrane	pkdcca	protein kinase domain containing, cytoplasmic a [Source:ZFIN;Acc:ZDB-GENE-081107-30]
ENSDARG00000035221	0	0	0	0	0	0	0	0	0	0	0	0	0	0	0	0	0	No.Diff.Exp	non-transmembrane	zgc:110249	zgc:110249 [Source:ZFIN;Acc:ZDB-GENE-050522-331]
ENSDARG00000035264	14	67	72	71	67	68	50	68	69	70	70	74	75	71	73	55	66	No.Diff.Exp	non-transmembrane	riok2	RIO kinase 2 (yeast) [Source:ZFIN;Acc:ZDB-GENE-040426-2913]
ENSDARG00000035282	0	89	87	0	88	0	0	89	89	89	89	95	94	94	90	92	94	No.Diff.Exp	transmembrane	emc6	ER membrane protein complex subunit 6 [Source:ZFIN;Acc:ZDB-GENE-030131-9164]
ENSDARG00000035285	8.75	61	58	15	61	53	49	60	58	42	60	63	62	14	63	61	69	No.Diff.Exp	non-transmembrane	ncor1	nuclear receptor corepressor 1 [Source:ZFIN;Acc:ZDB-GENE-040426-993]
ENSDARG00000035324	60	60	76	76	29.5	76	70	77	68	77	52	83	83	36	36	79	87	No.Diff.Exp	non-transmembrane	hnrpl	heterogeneous nuclear ribonucleoprotein L [Source:ZFIN;Acc:ZDB-GENE-040426-710]
ENSDARG00000035325	48	65	0	0	0	0	0	0	0	0	0	69	71	68	74	73	82	No.Diff.Exp	non-transmembrane	srsf7a	serine/arginine-rich splicing factor 7a [Source:ZFIN;Acc:ZDB-GENE-040426-1798]
ENSDARG00000035326	16	42	42	40	0	24	37	35	36	37	37	60	62	51	57	56	68	No.Diff.Exp	non-transmembrane	nccrp1	non-specific cytotoxic cell receptor protein 1 [Source:ZFIN;Acc:ZDB-GENE-000210-13]
ENSDARG00000035329	42	65	63	64	0	58	21	63	49.6667	68	64	85	82	65	76	70	79	No.Diff.Exp	non-transmembrane	capns1a	calpain, small subunit 1 a [Source:ZFIN;Acc:ZDB-GENE-030113-3]
ENSDARG00000035330	0	62	75	74	78	75	31	75	0	0	73.5	72	83	76	79	79	85	No.Diff.Exp	non-transmembrane	taf1	TAF1 RNA polymerase II, TATA box binding protein (TBP)-associated factor [Source:ZFIN;Acc:ZDB-GENE-030131-5576]
ENSDARG00000035400	0	0	0	0	0	0	0	0	0	0	0	0	0	0	0	0	97	No.Diff.Exp	non-transmembrane	btf3	basic transcription factor 3 [Source:ZFIN;Acc:ZDB-GENE-030131-8731]
ENSDARG00000035519	54.875	41	58.6667	42.75	69	64	54.6667	60.8571	61.1667	62.3333	62.3333	58.5	62	58.8571	57.6667	33.3333	0	No.Diff.Exp	non-transmembrane	histh1l	histone H1 like [Source:ZFIN;Acc:ZDB-GENE-050417-145]
ENSDARG00000035549	61	0	71	53	67	60	72	76	76	76	76	76	77	77	77	76	78	No.Diff.Exp	non-transmembrane	uprt	uracil phosphoribosyltransferase (FUR1) homolog (S. cerevisiae) [Source:ZFIN;Acc:ZDB-GENE-040426-2411]
ENSDARG00000035556	23	0	0	0	0	0	0	0	0	0	0	88	89	78	88	0	0	No.Diff.Exp	non-transmembrane	rps6ka3a	ribosomal protein S6 kinase a, polypeptide 3a [Source:ZFIN;Acc:ZDB-GENE-030219-119]
ENSDARG00000035557	0	0	0	0	0	64	70	93	93	93	93	0	0	0	0	0	0	No.Diff.Exp	non-transmembrane	gabarapa	GABA(A) receptor-associated protein a [Source:ZFIN;Acc:ZDB-GENE-030131-5174]
ENSDARG00000035558	51	65	35	30	0	48	56	55	55	56	56	67	70	71	69	68	71	No.Diff.Exp	non-transmembrane	gps2	G protein pathway suppressor 2 [Source:ZFIN;Acc:ZDB-GENE-040426-1176]
ENSDARG00000035559	32	53	50	0	0	49	40	48	44.5	48	48	45	49	38	48	47	55	No.Diff.Exp	non-transmembrane	tp53	tumor protein p53 [Source:ZFIN;Acc:ZDB-GENE-990415-270]
ENSDARG00000035564	0	74	70	73	73	66	64	71	71	71	71	76	77	75	75	77	42	No.Diff.Exp	non-transmembrane	dgcr8	DGCR8 microprocessor complex subunit [Source:ZFIN;Acc:ZDB-GENE-030131-3421]
ENSDARG00000035577	75	83	75	34	82	80	0	82	82	75	82	89	92	72	89	89	52	No.Diff.Exp	transmembrane	cds2	CDP-diacylglycerol synthase (phosphatidate cytidylyltransferase) 2 [Source:ZFIN;Acc:ZDB-GENE-030717-4]
ENSDARG00000035596	0	70	72	45	74	76	73	78	78	78	78	0	0	0	0	0	79	dre_Tcell	non-transmembrane	ISCU (2 of 2)	iron-sulfur cluster assembly enzyme [Source:HGNC Symbol;Acc:HGNC:29882]
ENSDARG00000035608	0	69	56	66	57	49	30	65	65	62	64	75	71	76	71	71	64	dre_NK	transmembrane	pgam5	phosphoglycerate mutase family member 5 [Source:ZFIN;Acc:ZDB-GENE-030131-683]
ENSDARG00000035622	16	45	45	0	26	0	42	28	49	47	26	65	65	63	62	34	65	No.Diff.Exp	non-transmembrane	xbp1	X-box binding protein 1 [Source:ZFIN;Acc:ZDB-GENE-011210-2]
ENSDARG00000035625	0	63	76	74	69	73	48	75	0	73	73	82	87	68	82	80	86	No.Diff.Exp	non-transmembrane	snrnp27	small nuclear ribonucleoprotein 27 (U4/U6.U5) [Source:ZFIN;Acc:ZDB-GENE-040718-457]
ENSDARG00000035652	28	68	58	65	64	49	42	63	64	63	63	72	0	0	0	0	53	No.Diff.Exp	non-transmembrane	sat1a.1	spermidine/spermine N1-acetyltransferase 1a, duplicate 1 [Source:ZFIN;Acc:ZDB-GENE-050913-41]
ENSDARG00000035676	74	77	82	80	80	80	80	80	74	79	80	85	86	89	83	85	90	No.Diff.Exp	non-transmembrane	ptp4a2b	protein tyrosine phosphatase type IVA, member 2b [Source:ZFIN;Acc:ZDB-GENE-041114-111]
ENSDARG00000035678	80	0	0	0	0	0	0	0	0	0	0	96	97	83	96	0	99	No.Diff.Exp	non-transmembrane	zgc:91910	zgc:91910 [Source:ZFIN;Acc:ZDB-GENE-040808-48]
ENSDARG00000035679	87	96	87	92	93	93	82	92	92	93	93	95	96	92	95	34	97	No.Diff.Exp	non-transmembrane	si:rp71-45k5.4	si:rp71-45k5.4 [Source:ZFIN;Acc:ZDB-GENE-060503-941]
ENSDARG00000035692	67	93	95	94	94	85	70	93	92.5	91	93	96	96	95	95	95	96	No.Diff.Exp	non-transmembrane	rps3a	ribosomal protein S3A [Source:ZFIN;Acc:ZDB-GENE-030131-9184]
ENSDARG00000035719	67	72	70	72	0	55	0	70	67	64	65	83	84	0	82	80	83	No.Diff.Exp	non-transmembrane	arl5c	ADP-ribosylation factor-like 5C [Source:ZFIN;Acc:ZDB-GENE-040426-1866]
ENSDARG00000035751	71	85	83	85	83	83	72	85	85	85	85	91	92	70	88	89	76	No.Diff.Exp	non-transmembrane	ipo7	importin 7 [Source:ZFIN;Acc:ZDB-GENE-030131-458]
ENSDARG00000035821	0	39	36	10	39	28.5	30	28	27.5	30	25.3333	32.5	38	19	32	33	48	No.Diff.Exp	non-transmembrane	si:ch211-173p18.3	si:ch211-173p18.3 [Source:ZFIN;Acc:ZDB-GENE-060503-672]
ENSDARG00000035858	0	75	70	0	67	72	72	72	55	0	73	83	84	83	79	80	0	No.Diff.Exp	non-transmembrane	cnn2	calponin 2 [Source:ZFIN;Acc:ZDB-GENE-030131-542]
ENSDARG00000035860	0	0	99	0	96	0	0	95	91.6667	96	96	100	0	100	97	97	59	No.Diff.Exp	non-transmembrane	rps28	ribosomal protein S28 [Source:ZFIN;Acc:ZDB-GENE-030131-2022]
ENSDARG00000035871	75	94	0	89.5	86	94	0	95	86.125	95	95	93	93	91	93	92	98	No.Diff.Exp	non-transmembrane	rpl30	ribosomal protein L30 [Source:ZFIN;Acc:ZDB-GENE-030131-8657]
ENSDARG00000035914	0	40	37	38	42	41	42	40	37	40.5	41	41	0	0	0	40	42	No.Diff.Exp	transmembrane	tmem167a	transmembrane protein 167A [Source:ZFIN;Acc:ZDB-GENE-050320-29]
ENSDARG00000035986	38	64	59	61	64	41	56	62	59	62	62	75	79	71	71	70	80	No.Diff.Exp	non-transmembrane	ptpn2b	protein tyrosine phosphatase, non-receptor type 2, b [Source:ZFIN;Acc:ZDB-GENE-030909-8]
ENSDARG00000035987	48	36	56	56	59	53	36	53	54	38	54	68	68	62	65	67	76	No.Diff.Exp	non-transmembrane	psmg2	proteasome (prosome, macropain) assembly chaperone 2 [Source:ZFIN;Acc:ZDB-GENE-040426-1972]
ENSDARG00000035993	0	87	0	96	95	0	0	98	97	96	96	97	98	98	95	96	0	No.Diff.Exp	non-transmembrane	sumo3b	small ubiquitin-like modifier 3b [Source:ZFIN;Acc:ZDB-GENE-040718-426]
ENSDARG00000036005	77	77	76	0	79	85	79	84	83	83	85	50	85	49	86	84	51	No.Diff.Exp	non-transmembrane	pitpnb	phosphatidylinositol transfer protein, beta [Source:ZFIN;Acc:ZDB-GENE-040426-895]
ENSDARG00000036008	0	70	0	0	0	36	0	38	38	38	36	64	65	61	0	0	80	No.Diff.Exp	transmembrane	caly	calcyon neuron-specific vesicular protein [Source:ZFIN;Acc:ZDB-GENE-090313-405]
ENSDARG00000036028	57	0	0	0	0	0	0	0	0	0	0	71	71	65	69	68	84	No.Diff.Exp	non-transmembrane	arrdc3b	arrestin domain containing 3b [Source:ZFIN;Acc:ZDB-GENE-040912-182]
ENSDARG00000036066	0	50	0	47	46	42	44	41	41	42	42	59	53.3333	53	0	0	66.5	No.Diff.Exp	non-transmembrane	si:dkey-78a14.4	si:dkey-78a14.4 [Source:ZFIN;Acc:ZDB-GENE-110408-8]
ENSDARG00000036070	0	57	0	52	0	28	48	56	56	54	54	0	0	63	66	63.5	75	No.Diff.Exp	non-transmembrane	znrd1	zinc ribbon domain containing 1 [Source:ZFIN;Acc:ZDB-GENE-050320-131]
ENSDARG00000036096	25	81	68	68	96	67	69	97	97	97	97	93	91	96	89	89	96	No.Diff.Exp	non-transmembrane	smad3a	SMAD family member 3a [Source:ZFIN;Acc:ZDB-GENE-000509-3]
ENSDARG00000036102	57	76	72	73	0	66	52	73	70	75	75	74	76	78	76	19	76	No.Diff.Exp	non-transmembrane	ctdsp2	CTD (carboxy-terminal domain, RNA polymerase II, polypeptide A) small phosphatase 2 [Source:ZFIN;Acc:ZDB-GENE-030131-184]
ENSDARG00000036104	16.5	43	0	15	69	55	63	62	63	62	63	81	81	69	78	33	86	No.Diff.Exp	non-transmembrane	MYO1G	myosin IG [Source:HGNC Symbol;Acc:HGNC:13880]
ENSDARG00000036106	0	48	39	39	48	47	43	48	48	47	48	59	60	47	58	58	60	No.Diff.Exp	non-transmembrane	rgs18	regulator of G-protein signaling 18 [Source:ZFIN;Acc:ZDB-GENE-061013-722]
ENSDARG00000036107	27	57	49	17	40	50	53	58	58	57	58	81	82	76	79	79	91	No.Diff.Exp	non-transmembrane	txnipa	thioredoxin interacting protein a [Source:ZFIN;Acc:ZDB-GENE-030804-10]
ENSDARG00000036117	0	60	0	0	0	0	0	0	0	0	0	76	77	71	75	77	83	No.Diff.Exp	transmembrane	mchr2	melanin-concentrating hormone receptor 2 [Source:ZFIN;Acc:ZDB-GENE-030502-6]
ENSDARG00000036144	0	28	24	32	32	26	25	26	26	29	29	21	22	0	0	0	47	No.Diff.Exp	non-transmembrane	tssc4	tumor suppressing subtransferable candidate 4 [Source:ZFIN;Acc:ZDB-GENE-060825-263]
ENSDARG00000036161	0	56.5	57	55	57	55	43.5	55	55	55	55	68	0	47	69	59	0	No.Diff.Exp	non-transmembrane	hnrnpa0l	heterogeneous nuclear ribonucleoprotein A0, like [Source:ZFIN;Acc:ZDB-GENE-030131-618]
ENSDARG00000036162	0	56.5	55	57	59	58	46	59	58	58	58	72	0	47	74	63	88	No.Diff.Exp	non-transmembrane	hnrnpa0b	heterogeneous nuclear ribonucleoprotein A0b [Source:ZFIN;Acc:ZDB-GENE-030131-6154]
ENSDARG00000036252	27	96	65	94	95	95	0	96	96	95	96	99	99	97	98	44	98	No.Diff.Exp	non-transmembrane	rras2	related RAS viral (r-ras) oncogene homolog 2 [Source:ZFIN;Acc:ZDB-GENE-050417-352]
ENSDARG00000036257	37	69	70	64	68	68	62	70	70	70	70	74	68	27	31	64	52	No.Diff.Exp	non-transmembrane	rasal2	RAS protein activator like 2 [Source:ZFIN;Acc:ZDB-GENE-070912-180]
ENSDARG00000036282	38	48	49	42	39	41	31	44	45	43	36	56	50	52	40	55	57	No.Diff.Exp	transmembrane	rnaset2	ribonuclease T2 [Source:ZFIN;Acc:ZDB-GENE-030131-2513]
ENSDARG00000036298	89	97	60	97	97	97	95	97	95	0	97	98	0	97	98	98	91	No.Diff.Exp	non-transmembrane	rps13	ribosomal protein S13 [Source:ZFIN;Acc:ZDB-GENE-040625-52]
ENSDARG00000036305	0	0	0	28	0	43	45	45	39	45	45	65	64	63	66	67	76	No.Diff.Exp	non-transmembrane	phf23b	PHD finger protein 23b [Source:ZFIN;Acc:ZDB-GENE-030131-5895]
ENSDARG00000036316	0	94	96	94	96	0	0	97	97.5	93.3333	94	96	0	96	96	98	98	No.Diff.Exp	non-transmembrane	rpl39	ribosomal protein L39 [Source:ZFIN;Acc:ZDB-GENE-040625-51]
ENSDARG00000036329	0	70	66	62	63	34	56	73	73	65	65	65	69	72	66	68	66	No.Diff.Exp	transmembrane	ndufa1	NADH dehydrogenase (ubiquinone) 1 alpha subcomplex, 1 [Source:ZFIN;Acc:ZDB-GENE-040625-168]
ENSDARG00000036359	22.5	46	42	39.5	49	49	36	47	45	51	51	0	50	49	0	0	41	No.Diff.Exp	non-transmembrane	minal	MYC induced nuclear antigen-like [Source:ZFIN;Acc:ZDB-GENE-040426-1283]
ENSDARG00000036375	50	86	97	98	98	94	83	98	73	98	98	99	99	97	99	99	99	No.Diff.Exp	non-transmembrane	cyfip2	cytoplasmic FMR1 interacting protein 2 [Source:ZFIN;Acc:ZDB-GENE-080724-2]
ENSDARG00000036414	0	35	0	0	0	2	0	0	0	0	0	51	53	0	52	45	60	No.Diff.Exp	non-transmembrane	CU019646.1
ENSDARG00000036415	17	55	60	61	38	57	43	60	59	62	61	68	71	69	67	69	73	No.Diff.Exp	transmembrane	glb1	galactosidase, beta 1 [Source:ZFIN;Acc:ZDB-GENE-050410-9]
ENSDARG00000036420	11	37	0	0	0	0	0	0	0	0	0	53	57	0	50	48	65	No.Diff.Exp	non-transmembrane	CR376787.1
ENSDARG00000036438	75	83	79	80	75	67	61	79	79	79	80	85	85	84	86	38	91	No.Diff.Exp	non-transmembrane	ndufv1	NADH dehydrogenase (ubiquinone) flavoprotein 1 [Source:ZFIN;Acc:ZDB-GENE-040808-73]
ENSDARG00000036479	16	0	0	0	0	0	0	0	0	0	0	24	24	0	20	0	32	No.Diff.Exp	transmembrane	si:dkeyp-80c12.4	si:dkeyp-80c12.4 [Source:ZFIN;Acc:ZDB-GENE-090313-403]
ENSDARG00000036482	34	37	38	43	0	34	0	45	45	37	44	48	47	47	38	42	54	No.Diff.Exp	non-transmembrane	hexim1	hexamethylene bis-acetamide inducible 1 [Source:ZFIN;Acc:ZDB-GENE-030131-4637]
ENSDARG00000036489	0	75	0	72	69	65	72	73	73	74	74	87	89	82	88	84	87	No.Diff.Exp	non-transmembrane	MAF1	MAF1 homolog, negative regulator of RNA polymerase III [Source:HGNC Symbol;Acc:HGNC:24966]
ENSDARG00000036510	0	60	57	46	59	60	40	60	60	58	58	54	55	53	55	52	73	No.Diff.Exp	non-transmembrane	ccnt2b	cyclin T2b [Source:ZFIN;Acc:ZDB-GENE-030131-183]
ENSDARG00000036587	58	67	51.6667	68.5	64	51.5	59.5	62	64	61	61	49	67.25	0	67	67	83	No.Diff.Exp	non-transmembrane	cbr1	carbonyl reductase 1 [Source:ZFIN;Acc:ZDB-GENE-030902-2]
ENSDARG00000036588	0	21.0417	17.5556	20	0	0	0	0	0	0	0	40	40.5714	33	26.5	39	31.15	No.Diff.Exp	transmembrane	mhc1zba	major histocompatibility complex class I ZBA [Source:ZFIN;Acc:ZDB-GENE-040426-2149]
ENSDARG00000036625	0	90	90	88	88	69	0	87	87	87	69	94	95	87	95	96	96	No.Diff.Exp	non-transmembrane	polr2f	polymerase (RNA) II (DNA directed) polypeptide F [Source:ZFIN;Acc:ZDB-GENE-040718-279]
ENSDARG00000036628	0	0	0	0	0	0	0	0	0	0	0	30	36	0	31	28	48	dre_Myel	transmembrane	cd74b	CD74 molecule, major histocompatibility complex, class II invariant chain b [Source:ZFIN;Acc:ZDB-GENE-990910-10]
ENSDARG00000036629	0	85	99	99	99	99	99	99	75.25	99	99	99	99	99	99	99	99	No.Diff.Exp	non-transmembrane	rps14	ribosomal protein S14 [Source:ZFIN;Acc:ZDB-GENE-030131-8631]
ENSDARG00000036637	0	48	49	0	40	0	0	46	45	44	44	70	65	0	64	65	64	dre_Myel	non-transmembrane	arl11	ADP-ribosylation factor-like 11 [Source:ZFIN;Acc:ZDB-GENE-030131-3410]
ENSDARG00000036658	80	83	84	0	82	74	49	82	81	81	81	90	90	88	93	93	97	No.Diff.Exp	non-transmembrane	cab39l	calcium binding protein 39-like [Source:ZFIN;Acc:ZDB-GENE-041114-204]
ENSDARG00000036675	39.5	56	55	57	44	57	38	59	39.6667	57.75	58	58	56	62	55	55	0	No.Diff.Exp	non-transmembrane	hnrnpa1b	heterogeneous nuclear ribonucleoprotein A1b [Source:ZFIN;Acc:ZDB-GENE-030912-14]
ENSDARG00000036698	0	11	14	0	0	0	0	15	15	0	16	0	0	3	12	23	69	No.Diff.Exp	non-transmembrane	znf865	zinc finger protein 865 [Source:ZFIN;Acc:ZDB-GENE-060503-896]
ENSDARG00000036700	0	98	96	97	0	84	0	98	98	98	98	0	0	0	0	0	0	No.Diff.Exp	non-transmembrane
ENSDARG00000036704	0	37	36	47	53	42	34	47	46	45	48	72	0	43	30	64	61	No.Diff.Exp	transmembrane	tmem18	transmembrane protein 18 [Source:ZFIN;Acc:ZDB-GENE-040927-26]
ENSDARG00000036754	0	0	46.5	38	50	0	36	47	63	49	59	69	0	0	0	0	78	No.Diff.Exp	non-transmembrane	hmgn3	high mobility group nucleosomal binding domain 3 [Source:ZFIN;Acc:ZDB-GENE-041114-180]
ENSDARG00000036784	0	0	0	43	61	60	54	61	61	60	60	77	66	74	75	76	87	No.Diff.Exp	non-transmembrane	commd7	COMM domain containing 7 [Source:ZFIN;Acc:ZDB-GENE-040801-96]
ENSDARG00000036785	0	0	0	0	0	0	0	0	0	0	0	0	0	0	0	0	30	No.Diff.Exp	transmembrane	si:ch211-226m16.2	si:ch211-226m16.2 [Source:ZFIN;Acc:ZDB-GENE-030131-2302]
ENSDARG00000036875	87	90.5	86	94	95	96	96	96	86.8333	96	96	98	66	98	98	98	100	No.Diff.Exp	non-transmembrane	rps12	ribosomal protein S12 [Source:ZFIN;Acc:ZDB-GENE-030131-8951]
ENSDARG00000036895	0	0	47	0	0	39	43	37	38	40	39	59	59	55	57	50	56	No.Diff.Exp	non-transmembrane	dap1b	death associated protein 1b [Source:ZFIN;Acc:ZDB-GENE-000511-4]
ENSDARG00000036924	0	58	67	61	68	64	0	59	66	0	66	69	71	67	69	36	72	No.Diff.Exp	non-transmembrane	TATDN1	TatD DNase domain containing 1 [Source:HGNC Symbol;Acc:HGNC:24220]
ENSDARG00000036942	0	80	0	69	76	0	0	0	0	0	0	85	85	81	79	76	79	dre_Tcell	non-transmembrane	gpd1c	glycerol-3-phosphate dehydrogenase 1c [Source:ZFIN;Acc:ZDB-GENE-040426-2576]
ENSDARG00000036967	60	40	74	73	72	71	72	70	70	67	70	78	83	61	76	74	89	No.Diff.Exp	non-transmembrane	smox	spermine oxidase [Source:ZFIN;Acc:ZDB-GENE-031201-3]
ENSDARG00000036995	95	96	96	96	96	96	50	96	96	96	96	98	98	98	98	98	100	No.Diff.Exp	non-transmembrane	lsm6	LSM6 homolog, U6 small nuclear RNA and mRNA degradation associated [Source:ZFIN;Acc:ZDB-GENE-040625-50]
ENSDARG00000037009	74	72	81	37	0	81	81	80	80	79	81	88	91	62.5	90	87.5	76	No.Diff.Exp	non-transmembrane	banf1	barrier to autointegration factor 1 [Source:ZFIN;Acc:ZDB-GENE-030131-6657]
ENSDARG00000037017	19.5	78	72	75	76	73	59	71	71	74	74	83	79	78	80	78	90	No.Diff.Exp	non-transmembrane	ube4b	ubiquitination factor E4B, UFD2 homolog (S. cerevisiae) [Source:ZFIN;Acc:ZDB-GENE-020205-1]
ENSDARG00000037038	0	97	97	91	85	97	90	97	97	97	97	97	97	97	97	69.5	99	No.Diff.Exp	non-transmembrane	psmc6	proteasome (prosome, macropain) 26S subunit, ATPase, 6 [Source:ZFIN;Acc:ZDB-GENE-030131-304]
ENSDARG00000037059	0	69	53	72	24	66	68	66	66	68	68	61	79	54	78	78	79	No.Diff.Exp	transmembrane	slc44a2	solute carrier family 44 (choline transporter), member 2 [Source:ZFIN;Acc:ZDB-GENE-030131-3065]
ENSDARG00000037060	0	25	35	39	0	43	39	45	44	43	45	58	57	53	60	27	71	No.Diff.Exp	non-transmembrane	kmt2d	lysine (K)-specific methyltransferase 2D [Source:ZFIN;Acc:ZDB-GENE-060223-2]
ENSDARG00000037071	91	0	92	93	93	85.3333	81.25	93	77.5714	93	93	94	93	92	92	96	0	No.Diff.Exp	non-transmembrane	rps26	ribosomal protein S26 [Source:ZFIN;Acc:ZDB-GENE-030131-8606]
ENSDARG00000037108	0	75	71	62	0	66	56	72	72	72	72	79	87	0	75	0	84	No.Diff.Exp	non-transmembrane	pfdn6	prefoldin subunit 6 [Source:ZFIN;Acc:ZDB-GENE-040426-1589]
ENSDARG00000037153	0	33	0	23	34	0	0	0	0	0	0	47	46	46	47	46	0	No.Diff.Exp	transmembrane	atp6ap1b	ATPase, H+ transporting, lysosomal accessory protein 1b [Source:ZFIN;Acc:ZDB-GENE-020423-2]
ENSDARG00000037155	0	39	40.6667	39	38	0	0	0	0	0	0	39.5	45.2857	47	46.3333	45	53	No.Diff.Exp	transmembrane	si:dkey-78k11.9	si:dkey-78k11.9 [Source:ZFIN;Acc:ZDB-GENE-060503-929]
ENSDARG00000037177	20	48	42	46	49	45	27	46	46	43	43	56	60	13	54	49	64	No.Diff.Exp	non-transmembrane	zc3h13	zinc finger CCCH-type containing 13 [Source:ZFIN;Acc:ZDB-GENE-040426-1619]
ENSDARG00000037229	61	51	75	76	76	62	0	75	72	75	75	81	80	78	0	78	91	No.Diff.Exp	non-transmembrane	denr	density-regulated protein [Source:ZFIN;Acc:ZDB-GENE-040718-450]
ENSDARG00000037259	0	57	64	55	53	53	0	52	54	54	54	67	71	66	71	72	34	No.Diff.Exp	transmembrane	ndufb6	NADH dehydrogenase (ubiquinone) 1 beta subcomplex, 6 [Source:ZFIN;Acc:ZDB-GENE-040426-1781]
ENSDARG00000037261	0	24	80	79	79	60	77	79	64	79	58	90	90	85	69	48	0	No.Diff.Exp	non-transmembrane	mtap	methylthioadenosine phosphorylase [Source:ZFIN;Acc:ZDB-GENE-040426-1505]
ENSDARG00000037318	74	70	73	81	82	82	76	82	83	82	82	88	88	84	85	86	90	No.Diff.Exp	transmembrane	ddost	dolichyl-diphosphooligosaccharide--protein glycosyltransferase subunit (non-catalytic) [Source:ZFIN;Acc:ZDB-GENE-040426-2147]
ENSDARG00000037350	60	92	88	88	89	87	87.5	83.6667	83.4615	88	89	91	91	89	90	90	91	No.Diff.Exp	non-transmembrane	rpl9	ribosomal protein L9 [Source:ZFIN;Acc:ZDB-GENE-030131-8646]
ENSDARG00000037353	43	52	39	61	60	59	57	58	59	59	59	58	51	20	49	0	68	No.Diff.Exp	non-transmembrane	frs2b	fibroblast growth factor receptor substrate 2b [Source:ZFIN;Acc:ZDB-GENE-040718-406]
ENSDARG00000037373	69	62	0	58	83	82	80	83	83	82	0	77	85	65	85	85	0	dre_Myel	transmembrane	ephb2a	eph receptor B2a [Source:ZFIN;Acc:ZDB-GENE-070713-2]
ENSDARG00000037392	0	41	45	64	63	50	29	64	64	64	50	72	83	73	84	79	85	No.Diff.Exp	non-transmembrane	med19a	mediator complex subunit 19a [Source:ZFIN;Acc:ZDB-GENE-060929-232]
ENSDARG00000037408	0	14	0	12	0	14	13	13	13	13	14	0	0	18	22	18	42	No.Diff.Exp	non-transmembrane	tbc1d10c	TBC1 domain family, member 10C [Source:ZFIN;Acc:ZDB-GENE-130125-1]
ENSDARG00000037421	22	67	64	0	67	59	65	63	63	0	64	77	77	61	75	69	83	No.Diff.Exp	non-transmembrane	egr1	early growth response 1 [Source:ZFIN;Acc:ZDB-GENE-980526-320]
ENSDARG00000037423	0	78	69	73	67	69	67	67	64	72	72	74	86	77	75	0	88	No.Diff.Exp	transmembrane	smim19	small integral membrane protein 19 [Source:ZFIN;Acc:ZDB-GENE-050913-125]
ENSDARG00000037503	64	77	76	76	73	71	57	74.5	74	76	76	77	79	73	73	72	6	No.Diff.Exp	non-transmembrane	thoc2	THO complex 2 [Source:ZFIN;Acc:ZDB-GENE-030616-54]
ENSDARG00000037506	0	98	97	22	98	97	79	95.6667	85.25	97	95	0	0	0	98	95	99	No.Diff.Exp	non-transmembrane	prps1b	phosphoribosyl pyrophosphate synthetase 1B [Source:ZFIN;Acc:ZDB-GENE-030131-4011]
ENSDARG00000037514	81	93	92	93	91	87	93	93	86	93	93	97	96	96	91	97	36.5	No.Diff.Exp	non-transmembrane	hdac3	histone deacetylase 3 [Source:ZFIN;Acc:ZDB-GENE-040426-847]
ENSDARG00000037517	0	0	0	33	36	23	20	29	29	29	29	42	69	53	62	0	81	No.Diff.Exp	transmembrane	slc35c2	solute carrier family 35 (GDP-fucose transporter), member C2 [Source:ZFIN;Acc:ZDB-GENE-030131-2202]
ENSDARG00000037554	15	56	34	0	0	0	0	0	0	0	0	71	69	67	0	71	32.5	No.Diff.Exp	non-transmembrane	arhgef3l	Rho guanine nucleotide exchange factor (GEF) 3, like [Source:ZFIN;Acc:ZDB-GENE-050522-85]
ENSDARG00000037556	42	47	40	44	44	45	38	44	44	44	44	51	0	45	47	52	60	dre_NK	transmembrane	st3gal5	ST3 beta-galactoside alpha-2,3-sialyltransferase 5 [Source:ZFIN;Acc:ZDB-GENE-060322-1]
ENSDARG00000037559	0	83	62	79	0	79	78	76	75.25	0	79	86	87	85	86	86	93	No.Diff.Exp	non-transmembrane	uba1	ubiquitin-like modifier activating enzyme 1 [Source:ZFIN;Acc:ZDB-GENE-040426-2009]
ENSDARG00000037628	50	58	52	55	0	51	54	51	50	53	53	65	67	57	0	65	72	No.Diff.Exp	non-transmembrane	trpt1	tRNA phosphotransferase 1 [Source:ZFIN;Acc:ZDB-GENE-050227-16]
ENSDARG00000037633	0	41	44	42	0	39	30	40	39	41	41	66	72	61	63	62	75	No.Diff.Exp	non-transmembrane	leng1	leukocyte receptor cluster (LRC) member 1 [Source:ZFIN;Acc:ZDB-GENE-040912-159]
ENSDARG00000037713	0	57	53	58	57	51	54	56	55	55	55	58	60	54	49	56	58	No.Diff.Exp	non-transmembrane	pcnp	PEST proteolytic signal containing nuclear protein [Source:ZFIN;Acc:ZDB-GENE-041010-130]
ENSDARG00000037746	98	86	99	94	99	99	99	99	99	92.6667	99	99	93	98	99	99	100	No.Diff.Exp	non-transmembrane	actb1	actin, beta 1 [Source:ZFIN;Acc:ZDB-GENE-000329-1]
ENSDARG00000037748	10	52	28	61	0	38	58	59	57	0	58	69	69	70	0	0	73	No.Diff.Exp	transmembrane	slc43a1b	solute carrier family 43 (amino acid system L transporter), member 1b [Source:ZFIN;Acc:ZDB-GENE-070209-173]
ENSDARG00000037836	0	54	50	49	53	52	0	51	52	45	51	61	61	60	33	59	74	No.Diff.Exp	transmembrane	igfals	insulin-like growth factor binding protein, acid labile subunit [Source:ZFIN;Acc:ZDB-GENE-061009-25]
ENSDARG00000037838	0	59	70	0	63	35	0	35.5	60	38	25	77	80	22	77	77	54	No.Diff.Exp	non-transmembrane	unkl	unkempt family zinc finger-like [Source:ZFIN;Acc:ZDB-GENE-131120-196]
ENSDARG00000037846	74	68	59	41	78	77	47	77	78	77	77	81	81	69	79	80	66	No.Diff.Exp	transmembrane	hm13	histocompatibility (minor) 13 [Source:ZFIN;Acc:ZDB-GENE-020802-3]
ENSDARG00000037855	54	59	53	55	56	63	28	63	62	63	62	66	66	58	67	66	51	No.Diff.Exp	non-transmembrane	taf11	TAF11 RNA polymerase II, TATA box binding protein (TBP)-associated factor [Source:ZFIN;Acc:ZDB-GENE-040718-283]
ENSDARG00000037860	0	72	36	65	0	0	0	0	0	0	0	84	83.5	86	0	85	0	No.Diff.Exp	non-transmembrane	cox6b2	cytochrome c oxidase subunit VIb polypeptide 2 [Source:ZFIN;Acc:ZDB-GENE-040426-1566]
ENSDARG00000037867	66	0	0	0	0	0	0	0	0	0	0	74	76	69	72	71.5	80	No.Diff.Exp	transmembrane	si:ch211-194i10.5	si:ch211-194i10.5 [Source:ZFIN;Acc:ZDB-GENE-131120-154]
ENSDARG00000037870	98.5	86	99	94	99	99	99	99	99	93	99	99	93	98	99.5	99	0	No.Diff.Exp	non-transmembrane	actb2	actin, beta 2 [Source:ZFIN;Acc:ZDB-GENE-000329-3]
ENSDARG00000037894	0	67	61	64	65	62	45	65	65	65	65	80	81	75	79	79	83	No.Diff.Exp	non-transmembrane	ezh1	enhancer of zeste 1 polycomb repressive complex 2 subunit [Source:ZFIN;Acc:ZDB-GENE-050114-1]
ENSDARG00000037919	9	49	45	29	14	49	43	50	50	50	50	25	31	9	14	9	61	No.Diff.Exp	non-transmembrane	rbbp6	retinoblastoma binding protein 6 [Source:ZFIN;Acc:ZDB-GENE-040930-5]
ENSDARG00000037925	0	0	0	0	0	0	0	0	0	0	0	0	0	0	0	0	0	No.Diff.Exp	non-transmembrane	rgs9a	regulator of G-protein signaling 9a [Source:ZFIN;Acc:ZDB-GENE-060929-92]
ENSDARG00000037928	59	73	73	73	73	73	50	74	74	73	73	80	83	69	78	38	72	No.Diff.Exp	non-transmembrane	ddx42	DEAD (Asp-Glu-Ala-Asp) box helicase 42 [Source:ZFIN;Acc:ZDB-GENE-050706-53]
ENSDARG00000037958	62	69	68	66	0	65	64	65	65	64	65	81	81	42	75	22	82	No.Diff.Exp	non-transmembrane	nosip	nitric oxide synthase interacting protein [Source:ZFIN;Acc:ZDB-GENE-041114-146]
ENSDARG00000037964	0	41	0	0	0	0	0	0	0	0	0	0	0	0	0	0	0	No.Diff.Exp	non-transmembrane	lhx2a	LIM homeobox 2a [Source:ZFIN;Acc:ZDB-GENE-091118-109]
ENSDARG00000037965	0	12	21	15.5	10	14.5	17	17.5	19.5	20	20.5	23	18	14	20	19	27	No.Diff.Exp	non-transmembrane	srrm2	serine/arginine repetitive matrix 2 [Source:ZFIN;Acc:ZDB-GENE-050522-399]
ENSDARG00000037980	0	0	83	87	0	86	0	87	71.2857	83.5	85	86	91	92	87	0	96	No.Diff.Exp	non-transmembrane	tceb2	transcription elongation factor B (SIII), polypeptide 2 [Source:ZFIN;Acc:ZDB-GENE-020415-1]
ENSDARG00000037998	72	80	61	80	0	78	25	79	79	79	79	90	90	34	90	91	92	No.Diff.Exp	non-transmembrane	flot1b	flotillin 1b [Source:ZFIN;Acc:ZDB-GENE-020430-2]
ENSDARG00000038010	0	64.5	76	83	82	83	82	82	82	0	82	84	83	67	77	72	0	No.Diff.Exp	non-transmembrane	rac2	ras-related C3 botulinum toxin substrate 2 (rho family, small GTP binding protein Rac2) [Source:ZFIN;Acc:ZDB-GENE-040625-27]
ENSDARG00000038011	0	63	49	61	63	63	39	60	60	62	62	65	73	45	63	64	51	No.Diff.Exp	non-transmembrane	cyth4a	cytohesin 4a [Source:ZFIN;Acc:ZDB-GENE-090624-6]
ENSDARG00000038027	0	43	36	43	46	43	43	49	49	49	49.5	52	52	46	29	49	60	No.Diff.Exp	non-transmembrane	nol12	nucleolar protein 12 [Source:ZFIN;Acc:ZDB-GENE-040426-1035]
ENSDARG00000038028	67	74	73	76	0	73	48	73	73	73	73	80	80	78	78	78	72	No.Diff.Exp	non-transmembrane	ndufa6	NADH dehydrogenase (ubiquinone) 1 alpha subcomplex, 6 [Source:ZFIN;Acc:ZDB-GENE-040426-1124]
ENSDARG00000038030	76	99	0	97	98	76	76	98	98	98	98	99	97	95	95	99	52	No.Diff.Exp	non-transmembrane	rbx1	ring-box 1, E3 ubiquitin protein ligase [Source:ZFIN;Acc:ZDB-GENE-041008-106]
ENSDARG00000038056	0	26	19	26	25	0	0	0	0	24	24	34	0	0	35	35	47	dre_Tcell	non-transmembrane	fgfbp2b	fibroblast growth factor binding protein 2b [Source:ZFIN;Acc:ZDB-GENE-070410-95]
ENSDARG00000038059	82	86	94	95	95	69	79	94	60.5	95	95	96	0	95	92	0	0	No.Diff.Exp	non-transmembrane	grb2b	growth factor receptor-bound protein 2b [Source:ZFIN;Acc:ZDB-GENE-040426-1975]
ENSDARG00000038068	0	65	73	69.5	73	75	65	75	75	75	75	82	83	81	80	77	87	No.Diff.Exp	transmembrane	ddx5	DEAD (Asp-Glu-Ala-Asp) box helicase 5 [Source:ZFIN;Acc:ZDB-GENE-030131-925]
ENSDARG00000038075	71	77	36	76	0	72	0	73	72	72	72	85	86	83	80	83	84	No.Diff.Exp	non-transmembrane	cyc1	cytochrome c-1 [Source:ZFIN;Acc:ZDB-GENE-031105-2]
ENSDARG00000038076	0	93	91	93	91	89	88	89	89	89	89	93	0	91	0	0	95	No.Diff.Exp	transmembrane	romo1	reactive oxygen species modulator 1 [Source:ZFIN;Acc:ZDB-GENE-040426-1768]
ENSDARG00000038094	36	34.5	68	69	70	68	57	69	66	70	70	76	75	58	73	65	78	No.Diff.Exp	non-transmembrane	clec16a	C-type lectin domain family 16, member A [Source:ZFIN;Acc:ZDB-GENE-040426-951]
ENSDARG00000038095	0	52	49	43	47	0	45	42	42	42	42	0	0	0	0	0	66	No.Diff.Exp	non-transmembrane	socs1a	suppressor of cytokine signaling 1a [Source:ZFIN;Acc:ZDB-GENE-040801-205]
ENSDARG00000038099	39	63	62	63	59	65	57	62	64	63	63	72	73	67	71	72	0	No.Diff.Exp	non-transmembrane	gskip	gsk3b interacting protein [Source:ZFIN;Acc:ZDB-GENE-040426-2777]
ENSDARG00000038106	0	61	54	77	66	73	73	74	73	0	73	80	72	81	80	55	86	No.Diff.Exp	transmembrane	slc37a4a	solute carrier family 37 (glucose-6-phosphate transporter), member 4a [Source:ZFIN;Acc:ZDB-GENE-040426-2230]
ENSDARG00000038107	52	0	60	54	63	60	56	60	60	62	62	65	67	60	64	50	74	No.Diff.Exp	transmembrane	sgcg	sarcoglycan, gamma [Source:ZFIN;Acc:ZDB-GENE-030724-2]
ENSDARG00000038141	0	27	26	26	28	28	29	28	28	27	28	35	36	32	30	26	0	No.Diff.Exp	non-transmembrane	atf4b	activating transcription factor 4b [Source:ZFIN;Acc:ZDB-GENE-070928-23]
ENSDARG00000038154	40	45	39	48	39	52	50	49	48	50	50	56	60	56	46	51	55	No.Diff.Exp	non-transmembrane	isca2	iron-sulfur cluster assembly 2 [Source:ZFIN;Acc:ZDB-GENE-131121-486]
ENSDARG00000038228	0	43	52	54	46	53	51	56	45.5	53	52	0	0	58	0	65	73	No.Diff.Exp	non-transmembrane	sepw2a	selenoprotein W, 2a [Source:ZFIN;Acc:ZDB-GENE-030428-1]
ENSDARG00000038235	0	44	40	32	43	0	0	0	0	0	0	49	53	39	41	41	49	No.Diff.Exp	transmembrane	pkdccb	protein kinase domain containing, cytoplasmic b [Source:ZFIN;Acc:ZDB-GENE-130530-599]
ENSDARG00000038258	0	45	46	45	48	46	0	45	45	47	47	61	62	61	60	62	50	No.Diff.Exp	transmembrane	proca	protein C (inactivator of coagulation factors Va and VIIIa), a [Source:ZFIN;Acc:ZDB-GENE-060824-5]
ENSDARG00000038290	27	70	66	69	70	69	65	69	69	69	69	77	80	73	75	76	87	No.Diff.Exp	non-transmembrane	thoc5	THO complex 5 [Source:ZFIN;Acc:ZDB-GENE-030131-3789]
ENSDARG00000038306	0	0	0	0	0	0	0	0	0	0	0	0	0	0	0	0	42	No.Diff.Exp	non-transmembrane	tsc22d1	TSC22 domain family, member 1 [Source:ZFIN;Acc:ZDB-GENE-030131-7785]
ENSDARG00000038312	32	66	67	71	63	76	71	76	51	75	76	82	80	81	79	77	84	No.Diff.Exp	non-transmembrane	rcl1	RNA terminal phosphate cyclase-like 1 [Source:ZFIN;Acc:ZDB-GENE-040930-11]
ENSDARG00000038442	0	68	65	71	68	65	64	71	71	71	71	78	82	63	82	56	76	No.Diff.Exp	non-transmembrane	plcg1	phospholipase C, gamma 1 [Source:ZFIN;Acc:ZDB-GENE-030421-3]
ENSDARG00000038475	53	68	60.5	68	65	57	41	60	60	55	57	79	80	76	77	76	81	No.Diff.Exp	non-transmembrane	acy1	aminoacylase 1 [Source:ZFIN;Acc:ZDB-GENE-040426-755]
ENSDARG00000038524	46	79	77	79	80	80	36	78	79	79	79	82	84	81	81	28	90	No.Diff.Exp	non-transmembrane	pik3r1	phosphoinositide-3-kinase, regulatory subunit 1 (alpha) [Source:ZFIN;Acc:ZDB-GENE-030131-1280]
ENSDARG00000038537	28	59	51	56	54	63	59	63	55	39	63	41	68	64	64	67	81	No.Diff.Exp	non-transmembrane	gga1	golgi-associated, gamma adaptin ear containing, ARF binding protein 1 [Source:ZFIN;Acc:ZDB-GENE-040822-13]
ENSDARG00000038576	84	90	98	95	95	95	68.5	95	95	95	95	0	0	0	0	0	100	No.Diff.Exp	non-transmembrane	ube2d1b	ubiquitin-conjugating enzyme E2D 1b [Source:ZFIN;Acc:ZDB-GENE-030131-2735]
ENSDARG00000038577	0	68	62	0	57	61	0	59	53	58	58	72	76	79	84	79	75	No.Diff.Exp	transmembrane	cox6c	cytochrome c oxidase subunit VIc [Source:ZFIN;Acc:ZDB-GENE-040724-95]
ENSDARG00000038583	40	41	0	0	0	0	0	0	0	0	0	54	56	0	53	48	71	No.Diff.Exp	non-transmembrane	abraa	actin binding Rho activating protein a [Source:ZFIN;Acc:ZDB-GENE-120730-1]
ENSDARG00000038587	0	9	0	0	0	0	0	0	0	0	0	0	0	0	0	0	27	No.Diff.Exp	transmembrane	CU929150.1
ENSDARG00000038608	51	60	63	43	38	56	40	54	53	34	60	67	0	66	62	31	47	No.Diff.Exp	transmembrane	sdhc	succinate dehydrogenase complex, subunit C, integral membrane protein [Source:ZFIN;Acc:ZDB-GENE-040801-26]
ENSDARG00000038635	0	98	98	98	98	95.5	79	97.5	97.5	97.5	97.5	100	100	100	99	97	100	No.Diff.Exp	non-transmembrane	magoh	mago homolog, exon junction complex core component [Source:ZFIN;Acc:ZDB-GENE-041216-1]
ENSDARG00000038672	4	43	66	44	69	58	62	42	57	44	51	75	74	0	71	69	72	dre_Tcell	non-transmembrane	tcf7	transcription factor 7 (T-cell specific, HMG-box) [Source:ZFIN;Acc:ZDB-GENE-050222-4]
ENSDARG00000038687	29	44	44	49	48	44	48	48	48	38	48	63	63	52	59	59	69	No.Diff.Exp	non-transmembrane	nfkb2	nuclear factor of kappa light polypeptide gene enhancer in B-cells 2 (p49/p100) [Source:ZFIN;Acc:ZDB-GENE-030131-6701]
ENSDARG00000038695	0	83	81	0	68	73	67	82	82	82	81	84	84	69	77.5	74.5	93	No.Diff.Exp	non-transmembrane	elavl1	ELAV like RNA binding protein 1 [Source:ZFIN;Acc:ZDB-GENE-990415-245]
ENSDARG00000038737	1	36	38	39	38	38	37	38	38	39	39	32	32	27	32	0	58	No.Diff.Exp	non-transmembrane	phf20b	PHD finger protein 20, b [Source:ZFIN;Acc:ZDB-GENE-040822-33]
ENSDARG00000038754	37	61	62	63	61	54	54	56	56	37	56	80	79	79	78	80	74	No.Diff.Exp	non-transmembrane	plk3	polo-like kinase 3 (Drosophila) [Source:ZFIN;Acc:ZDB-GENE-030131-6134]
ENSDARG00000038768	49	0	0	57	0	58	40.5	59	57	0	57	72	0	63	63	71	73	No.Diff.Exp	non-transmembrane	mrpl12	mitochondrial ribosomal protein L12 [Source:ZFIN;Acc:ZDB-GENE-050417-187]
ENSDARG00000038780	44.5	68	0	0	0	0	0	0	0	0	0	71	77	72	72	74	72	No.Diff.Exp	non-transmembrane	ubtfl	upstream binding transcription factor, like [Source:ZFIN;Acc:ZDB-GENE-040426-1159]
ENSDARG00000038787	28	54	0	42	38	40	41	40	39	40	40	29	53	60	53	54	0	No.Diff.Exp	transmembrane	tmub1	transmembrane and ubiquitin-like domain containing 1 [Source:ZFIN;Acc:ZDB-GENE-040426-2504]
ENSDARG00000038900	41.5	79	80	62	0	63	55	79	79	78	79	82	85	80	84	83	86	No.Diff.Exp	non-transmembrane	acadm	acyl-CoA dehydrogenase, C-4 to C-12 straight chain [Source:ZFIN;Acc:ZDB-GENE-040426-1945]
ENSDARG00000038901	30	0	40	0	0	49	47	48	48	50	39.5	47	66	63	50	48	76	No.Diff.Exp	transmembrane	tmem256	transmembrane protein 256 [Source:ZFIN;Acc:ZDB-GENE-050417-92]
ENSDARG00000038905	39	51	65	74	52.5	66	70	69	70	69	69	87	87	68	83	71	83	No.Diff.Exp	non-transmembrane	hectd3	HECT domain containing 3 [Source:ZFIN;Acc:ZDB-GENE-031118-179]
ENSDARG00000038967	0	94	96	96	94	92	74	96	93	95	95	95	95	95.5	54.3333	34.5	96	dre_NK	non-transmembrane	cul3a	cullin 3a [Source:ZFIN;Acc:ZDB-GENE-030131-3376]
ENSDARG00000039005	0	81	78	79	0	79	0	79	79	79	79	59	79	81	70	76	88	No.Diff.Exp	non-transmembrane	trappc1	trafficking protein particle complex 1 [Source:ZFIN;Acc:ZDB-GENE-040718-242]
ENSDARG00000039007	75	81	0	27	0	71	78	79	80	79	79	88	88	84	65	68	88	No.Diff.Exp	non-transmembrane	eno3	enolase 3, (beta, muscle) [Source:ZFIN;Acc:ZDB-GENE-031006-5]
ENSDARG00000039008	0	0	0	0	0	0	0	0	0	0	0	94	94	89	0	0	95	No.Diff.Exp	transmembrane	zgc:85858	zgc:85858 [Source:ZFIN;Acc:ZDB-GENE-040426-2333]
ENSDARG00000039034	0	35	30	37	29	29	0	34	32	30	34	57	57	56	55	49	54	No.Diff.Exp	non-transmembrane	marcksl1a	MARCKS-like 1a [Source:ZFIN;Acc:ZDB-GENE-040426-2146]
ENSDARG00000039063	13	12	16	0	0	15	13	8	0	16	18	28	0	23	11.3333	0	25	No.Diff.Exp	non-transmembrane	PGBD4 (1 of 4)	piggyBac transposable element derived 4 [Source:HGNC Symbol;Acc:HGNC:19401]
ENSDARG00000039099	56.3043	0	0	0	0	0	0	0	0	0	0	0	0	52	0	0	61	No.Diff.Exp	non-transmembrane	zgc:113413	zgc:113413 [Source:ZFIN;Acc:ZDB-GENE-050306-5]
ENSDARG00000039117	0	51	45	54	49	50	47	54	51	53	53	59	60	55	60	61	65	No.Diff.Exp	non-transmembrane	tefa	thyrotrophic embryonic factor a [Source:ZFIN;Acc:ZDB-GENE-990415-264]
ENSDARG00000039125	0	76	74	78	77	75	56	75	76	76	76	85	83	81	82	80	89	No.Diff.Exp	non-transmembrane	map4k5	mitogen-activated protein kinase kinase kinase kinase 5 [Source:ZFIN;Acc:ZDB-GENE-030131-6497]
ENSDARG00000039142	0	78	81	70.5	60	81	0	77	81	81	81	0	0	0	0	0	93	No.Diff.Exp	non-transmembrane	arpc5a	actin related protein 2/3 complex, subunit 5A [Source:ZFIN;Acc:ZDB-GENE-030131-8448]
ENSDARG00000039162	42	80	0	0	0	0	0	0	0	0	0	97	97	96	92	0	99	No.Diff.Exp	non-transmembrane	rhebl1	Ras homolog enriched in brain like 1 [Source:ZFIN;Acc:ZDB-GENE-000510-1]
ENSDARG00000039265	0	45	0	0	0	0	0	0	0	0	0	52	47	41	44	41	17	No.Diff.Exp	non-transmembrane	arhgap4a	Rho GTPase activating protein 4a [Source:ZFIN;Acc:ZDB-GENE-040426-1229]
ENSDARG00000039268	0	77	79	80	68	77	77	77	77	77	77	94	94	92	95	95	92	No.Diff.Exp	transmembrane	emc4	ER membrane protein complex subunit 4 [Source:ZFIN;Acc:ZDB-GENE-040426-1891]
ENSDARG00000039328	0	53	43	48	50	35	31	38	37	39	38	42	61	58	0	46	68	No.Diff.Exp	non-transmembrane	CCNDBP1	cyclin D-type binding-protein 1 [Source:HGNC Symbol;Acc:HGNC:1587]
ENSDARG00000039338	0	43	38	39	0	33	36	33	34	35	36	50	51	47	49	0	57	No.Diff.Exp	non-transmembrane	gadd45gip1	growth arrest and DNA-damage-inducible, gamma interacting protein 1 [Source:ZFIN;Acc:ZDB-GENE-091204-282]
ENSDARG00000039346	77	37	78	70	70	0	0	67	68	68	64	81	83	78	78	78	83	No.Diff.Exp	non-transmembrane	ndufa5	NADH dehydrogenase (ubiquinone) 1 alpha subcomplex, 5 [Source:ZFIN;Acc:ZDB-GENE-050320-17]
ENSDARG00000039347	83	89	89	88	88	89	64	89	87	89	89	82	93	91	92	92	92	No.Diff.Exp	non-transmembrane	rps24	ribosomal protein S24 [Source:ZFIN;Acc:ZDB-GENE-040109-5]
ENSDARG00000039392	0	21.5	38	42	43	37	32	40	41	41	41	49	46	35	48	0	50	No.Diff.Exp	non-transmembrane	wnk1b	WNK lysine deficient protein kinase 1b [Source:ZFIN;Acc:ZDB-GENE-030131-2656]
ENSDARG00000039399	77	55	82	84	90	87	73	88	88	88	88	91	87	63	90	52	95	No.Diff.Exp	non-transmembrane	nt5c2a	5'-nucleotidase, cytosolic IIa [Source:ZFIN;Acc:ZDB-GENE-030131-3566]
ENSDARG00000039430	0	61	56	0	50	40	57	59	59	60	60	0	0	0	0	0	80	No.Diff.Exp	non-transmembrane	msl2b	male-specific lethal 2 homolog b (Drosophila) [Source:ZFIN;Acc:ZDB-GENE-030131-1621]
ENSDARG00000039490	0	75	80	75	78	71	73	79	79	79	79	34	81	69	0	69	88	No.Diff.Exp	non-transmembrane	pitpnaa	phosphatidylinositol transfer protein, alpha a [Source:ZFIN;Acc:ZDB-GENE-040426-744]
ENSDARG00000039515	0	35	35	33	33	35	33	35	36	36	36	43	46	44	43	41	52	No.Diff.Exp	non-transmembrane	atf4a	activating transcription factor 4a [Source:ZFIN;Acc:ZDB-GENE-040426-2340]
ENSDARG00000039517	0	51	50	50	51	38	0	46	46	47	47	56	57	53	57	56	56	No.Diff.Exp	transmembrane	c8b	complement component 8, beta polypeptide [Source:ZFIN;Acc:ZDB-GENE-070912-163]
ENSDARG00000039563	56	0	0	67	68	56	50	64	64	65	65	73	75	57	44	72	79	No.Diff.Exp	transmembrane	loxl3b	lysyl oxidase-like 3b [Source:ZFIN;Acc:ZDB-GENE-030131-8210]
ENSDARG00000039578	64	54	73	74	66	73	42	74	60.5	29	51	76	77	0	74	75	81	No.Diff.Exp	non-transmembrane	pa2g4a	proliferation-associated 2G4, a [Source:ZFIN;Acc:ZDB-GENE-030616-161]
ENSDARG00000039601	76	80	79	0	0	76	50	72.5	0	78	78	85	91	83	83	86	90	No.Diff.Exp	transmembrane	ier3ip1	immediate early response 3 interacting protein 1 [Source:ZFIN;Acc:ZDB-GENE-050506-106]
ENSDARG00000039652	0	53	0	0	0	0	0	0	0	0	0	31	0	0	0	59	69	No.Diff.Exp	transmembrane	si:dkey-235d18.5	si:dkey-235d18.5 [Source:ZFIN;Acc:ZDB-GENE-041014-243]
ENSDARG00000039682	13	21	18	21	20	14	12	20	20	21	22	21	22	20	20	20	0	No.Diff.Exp	non-transmembrane	DUPD1 (1 of 11)	dual specificity phosphatase and pro isomerase domain containing 1 [Source:HGNC Symbol;Acc:HGNC:23481]
ENSDARG00000039729	0	0	68	77	79	72	58	77	73	77	77	81	84	62	84	84	39.5	No.Diff.Exp	non-transmembrane	asap1b	ArfGAP with SH3 domain, ankyrin repeat and PH domain 1b [Source:ZFIN;Acc:ZDB-GENE-091112-16]
ENSDARG00000039801	0	36.2692	34.8	33.625	0	0	36	36.1818	34.5581	38.6	39.0556	46	43.7222	0	39.2	42.3333	45	No.Diff.Exp	transmembrane	zgc:153659	zgc:153659 [Source:ZFIN;Acc:ZDB-GENE-060825-311]
ENSDARG00000039820	32	50	39	41	0	47	43	49	49	46	46	55	63	57	55	51	74	No.Diff.Exp	non-transmembrane	mea1	male-enhanced antigen 1 [Source:ZFIN;Acc:ZDB-GENE-070424-117]
ENSDARG00000039830	0	0	81	79	82	84	0	84	83.3333	81	84	0	0	87	90	76	88	No.Diff.Exp	non-transmembrane	gng5	guanine nucleotide binding protein (G protein), gamma 5 [Source:ZFIN;Acc:ZDB-GENE-030131-9966]
ENSDARG00000039850	0	66	64	62	65	58	53	61	61	52	62	67	44	57	62	78	33	No.Diff.Exp	non-transmembrane	dusp22b	dual specificity phosphatase 22b [Source:ZFIN;Acc:ZDB-GENE-050417-257]
ENSDARG00000039880	57	77	77	0	79	77	75	78	78	78	78	0	77	73	0	0	86	No.Diff.Exp	non-transmembrane	arpp19b	cAMP-regulated phosphoprotein 19b [Source:ZFIN;Acc:ZDB-GENE-040426-930]
ENSDARG00000039887	50	63	60	59	54	58	50	60	60	61	61	67	69	65	0	67	72	No.Diff.Exp	non-transmembrane	c1qbp	complement component 1, q subcomponent binding protein [Source:ZFIN;Acc:ZDB-GENE-050417-408]
ENSDARG00000039914	64	83	0	84	0	71	37	75	76	77	78	91	91	85	90	89	95	No.Diff.Exp	non-transmembrane	gapdhs	glyceraldehyde-3-phosphate dehydrogenase, spermatogenic [Source:ZFIN;Acc:ZDB-GENE-020913-1]
ENSDARG00000039931	61	78	0	72	76	76	0	75	75	76	76	89	89	87	88	86	92	No.Diff.Exp	transmembrane	slc25a33	solute carrier family 25 (pyrimidine nucleotide carrier), member 33 [Source:ZFIN;Acc:ZDB-GENE-040426-2183]
ENSDARG00000039959	0	49	45	45	46	43	44	44	45	45	44	61	62	63	60	60	71	No.Diff.Exp	transmembrane	gdnfa	glial cell derived neurotrophic factor a [Source:ZFIN;Acc:ZDB-GENE-010226-1]
ENSDARG00000039969	45	43	62	0	0	58	41	57	58	0	59	71	65	61	67	0	76	No.Diff.Exp	non-transmembrane	akirin1	akirin 1 [Source:ZFIN;Acc:ZDB-GENE-040426-2178]
ENSDARG00000039980	65	69	64	68	67	67	43	66	65	66	67	76	77	73	77	42	78	No.Diff.Exp	transmembrane	ppt1	palmitoyl-protein thioesterase 1 (ceroid-lipofuscinosis, neuronal 1, infantile) [Source:ZFIN;Acc:ZDB-GENE-040426-2653]
ENSDARG00000040001	18	78	77	75	79	76	58	76	76	77	77	85	87	29	51	69	85	No.Diff.Exp	non-transmembrane	fryl	furry homolog, like [Source:ZFIN;Acc:ZDB-GENE-040914-58]
ENSDARG00000040004	4	50	51	0	0	50	38	50	50	51	51	0	0	50	56	53	54	No.Diff.Exp	transmembrane	PKHD1L1 (1 of 2)	polycystic kidney and hepatic disease 1 (autosomal recessive)-like 1 [Source:HGNC Symbol;Acc:HGNC:20313]
ENSDARG00000040021	57	79	72	78	78	77	51	78	76	78	78	83	86	83	83	84	90	No.Diff.Exp	non-transmembrane	ebag9	estrogen receptor binding site associated, antigen, 9 [Source:ZFIN;Acc:ZDB-GENE-040426-1093]
ENSDARG00000040031	40	74	75	0	75	75	70	75	57	75	75	70	70	70	73.5	73	87	No.Diff.Exp	non-transmembrane	tardbp	TAR DNA binding protein [Source:ZFIN;Acc:ZDB-GENE-030131-3777]
ENSDARG00000040059	0	0	0	0	0	0	0	0	0	0	0	44	0	64	64	61	77	No.Diff.Exp	non-transmembrane	gbp	glycogen synthase kinase binding protein [Source:ZFIN;Acc:ZDB-GENE-990714-7]
ENSDARG00000040076	0	35	26	32	0	28	22	28	27	21	21.5	30.5	30.6667	0	33	0	0	No.Diff.Exp	non-transmembrane	pycard	PYD and CARD domain containing [Source:ZFIN;Acc:ZDB-GENE-000511-2]
ENSDARG00000040080	29	55	0	52	0	0	0	0	0	0	0	72	65	57	67	0	54	No.Diff.Exp	non-transmembrane	fli1b	Fli-1 proto-oncogene, ETS transcription factor b [Source:ZFIN;Acc:ZDB-GENE-031114-3]
ENSDARG00000040121	89	98	90	95	95	95	84	95	95	95	95	97	98	95	98	35	100	No.Diff.Exp	non-transmembrane	psma2	proteasome (prosome, macropain) subunit, alpha type, 2 [Source:ZFIN;Acc:ZDB-GENE-050522-479]
ENSDARG00000040157	45	58	0	59	62	62	45	61	59	61	61	71	72	72	72	73	80	No.Diff.Exp	transmembrane	glt8d1	glycosyltransferase 8 domain containing 1 [Source:ZFIN;Acc:ZDB-GENE-041114-23]
ENSDARG00000040158	0	0	0	0	0	0	0	0	0	0	0	86.6667	77.4	97	94	93	97	No.Diff.Exp	non-transmembrane	cdc42l	cell division cycle 42, like [Source:ZFIN;Acc:ZDB-GENE-030131-6069]
ENSDARG00000040184	62	77	78	79	61	64	61	77	78	77	77	61	0	62	79	72	79	No.Diff.Exp	non-transmembrane	syncrip	synaptotagmin binding, cytoplasmic RNA interacting protein [Source:ZFIN;Acc:ZDB-GENE-030131-4862]
ENSDARG00000040230	0	33.3333	0	27.5	35	34	33	33	33	35	35	43.2414	48.9444	39	47	44	47.625	No.Diff.Exp	non-transmembrane	TRIM35 (10 of 38)	tripartite motif containing 35 [Source:HGNC Symbol;Acc:HGNC:16285]
ENSDARG00000040237	17	65	58	0	66	58	55	60	60	62	62	63	63	58	64	57	73	No.Diff.Exp	non-transmembrane	mef2d	myocyte enhancer factor 2d [Source:ZFIN;Acc:ZDB-GENE-990415-164]
ENSDARG00000040245	70	86	87	48	86	81	74	79	78.5	79.5	80.5	93	92	90	90	88	51	No.Diff.Exp	non-transmembrane	kpnb3	karyopherin (importin) beta 3 [Source:ZFIN;Acc:ZDB-GENE-030424-2]
ENSDARG00000040250	0	0	0	0	0	0	0	0	0	0	0	17.75	21.6667	17	0	0	0	No.Diff.Exp	transmembrane	si:ch211-132g1.1	si:ch211-132g1.1 [Source:ZFIN;Acc:ZDB-GENE-090313-24]
ENSDARG00000040286	42	48	56	30	61	61	38	62	62	61	61	69	69	66	68	67	71	No.Diff.Exp	non-transmembrane	ubl7b	ubiquitin-like 7b (bone marrow stromal cell-derived) [Source:ZFIN;Acc:ZDB-GENE-040426-1334]
ENSDARG00000040287	80	0	0	0	0	0	0	0	0	0	0	81	81	76	0	0	84	No.Diff.Exp	non-transmembrane	ywhabl	tyrosine 3-monooxygenase/tryptophan 5-monooxygenase activation protein, beta polypeptide like [Source:ZFIN;Acc:ZDB-GENE-030131-448]
ENSDARG00000040310	0	68	68	69	68	64	53	69	69	70	70	74	75	63	77	74	84	No.Diff.Exp	non-transmembrane	prpf4bb	pre-mRNA processing factor 4Bb [Source:ZFIN;Acc:ZDB-GENE-040426-2799]
ENSDARG00000040332	0	0	0	0	0	0	0	0	0	0	0	20	12	19	22	23	27	No.Diff.Exp	transmembrane	crfb2	cytokine receptor family member b2 [Source:ZFIN;Acc:ZDB-GENE-070905-2]
ENSDARG00000040334	0	88	82	86	0	80	82	90	89	90	90	87	89	72	80	85	93	No.Diff.Exp	non-transmembrane	mat2aa	methionine adenosyltransferase II, alpha a [Source:ZFIN;Acc:ZDB-GENE-030131-2049]
ENSDARG00000040396	0	63	59	60	60	64	51	64	64	64	52	59	61	55.5	0	49	82	No.Diff.Exp	non-transmembrane	bcl7bb	B-cell CLL/lymphoma 7B, b [Source:ZFIN;Acc:ZDB-GENE-010328-17]
ENSDARG00000040407	59.5	96	96	96	97	80.5	0	77.3333	77.6667	82.5	79.3333	96	48	75	96	95	89	No.Diff.Exp	non-transmembrane	usp22	ubiquitin specific peptidase 22 [Source:ZFIN;Acc:ZDB-GENE-060512-211]
ENSDARG00000040432	0	60	0	0	57	44	0	49	49	48	49	65	56	62	43	67	69	dre_Tcell	non-transmembrane	klf2b	Kruppel-like factor 2b [Source:ZFIN;Acc:ZDB-GENE-011109-2]
ENSDARG00000040439	0	84	77	78	0	80	67	81	80	80	80	86	88	84	83	0	89	No.Diff.Exp	non-transmembrane	rsl24d1	ribosomal L24 domain containing 1 [Source:ZFIN;Acc:ZDB-GENE-040426-1925]
ENSDARG00000040440	0	92	97	98	0	99	98	96.5	98	99	99	99	99	98	97	84	100	No.Diff.Exp	non-transmembrane	snrpd2	small nuclear ribonucleoprotein D2 polypeptide [Source:ZFIN;Acc:ZDB-GENE-040914-10]
ENSDARG00000040443	0	93	0	0	90	93	0	93	93	93	93	99	98	97	98	98	98	No.Diff.Exp	non-transmembrane	polr2i	polymerase (RNA) II (DNA directed) polypeptide I [Source:ZFIN;Acc:ZDB-GENE-041010-106]
ENSDARG00000040465	27	57	56	42	60	56	47	61	60	61	61	58	57	54	55	0	76	No.Diff.Exp	non-transmembrane	irf2	interferon regulatory factor 2 [Source:ZFIN;Acc:ZDB-GENE-041212-38]
ENSDARG00000040482	0	68	59	66	66	55	47	63	65	66	65	76	78	0	65	67	85	No.Diff.Exp	non-transmembrane	osbpl3b	oxysterol binding protein-like 3b [Source:ZFIN;Acc:ZDB-GENE-090109-1]
ENSDARG00000040487	0	0	0	0	0	0	0	0	0	0	0	0	0	0	0	0	0	No.Diff.Exp	non-transmembrane	zgc:113176	zgc:113176 [Source:ZFIN;Acc:ZDB-GENE-050327-60]
ENSDARG00000040526	34	58	0	63	0	0	0	0	0	0	0	71	74	67	69	67	83	No.Diff.Exp	transmembrane	s1pr5a	sphingosine-1-phosphate receptor 5a [Source:ZFIN;Acc:ZDB-GENE-041114-188]
ENSDARG00000040557	0	45	63	56	50	61	47	62	61	62	61	76	81	76	77	70	81	No.Diff.Exp	non-transmembrane	exosc5	exosome component 5 [Source:ZFIN;Acc:ZDB-GENE-060503-675]
ENSDARG00000040606	0	76	73	70	75	65	48	62	64	65	65	87	87	87	86	85	82	No.Diff.Exp	non-transmembrane	tfap2c	transcription factor AP-2 gamma (activating enhancer binding protein 2 gamma) [Source:ZFIN;Acc:ZDB-GENE-041212-61]
ENSDARG00000040607	47	50	56	37	56	57	54	58	57	56	56	71	70	65	65	0	76	No.Diff.Exp	non-transmembrane	rtfdc1	replication termination factor 2 domain containing 1 [Source:ZFIN;Acc:ZDB-GENE-030131-4825]
ENSDARG00000040608	44	52	43	48	49	44	39	42	42	38	48	56	60	47	50	0	64	No.Diff.Exp	transmembrane	gcnt7	glucosaminyl (N-acetyl) transferase family member 7 [Source:ZFIN;Acc:ZDB-GENE-120919-3]
ENSDARG00000040620	0	46	45	44	44	42	36	42	41	41	41	43	55	27	53	52	63	dre_NK	non-transmembrane	psmg1	proteasome (prosome, macropain) assembly chaperone 1 [Source:ZFIN;Acc:ZDB-GENE-040718-469]
ENSDARG00000040640	0	0	0	0	0	0	0	0	0	0	0	0	0	0	0	0	0	No.Diff.Exp	transmembrane	si:ch73-44m9.3	si:ch73-44m9.3 [Source:ZFIN;Acc:ZDB-GENE-081104-290]
ENSDARG00000040643	0	0	0	0	0	0	0	0	0	0	0	42	42	33	35	37	47	No.Diff.Exp	transmembrane	ccr10	chemokine (C-C motif) receptor 10 [Source:ZFIN;Acc:ZDB-GENE-040718-424]
ENSDARG00000040650	0	90	88	90	90	59	70	88	88	55	87	89	91	77	86	62	71	No.Diff.Exp	non-transmembrane	gps1	G protein pathway suppressor 1 [Source:ZFIN;Acc:ZDB-GENE-041111-240]
ENSDARG00000040666	38	0	40	55	50	48	27	45	43	49	49	58	64	56	58	57	65	No.Diff.Exp	non-transmembrane	nifk	nucleolar protein interacting with the FHA domain of MKI67 [Source:ZFIN;Acc:ZDB-GENE-021231-4]
ENSDARG00000040713	0	72	0	0	0	63	48	66	67	68	68	0	0	61	0	0	84	No.Diff.Exp	non-transmembrane	rbbp9	retinoblastoma binding protein 9 [Source:ZFIN;Acc:ZDB-GENE-050208-692]
ENSDARG00000040822	0	78	68	74	72	73	71	71	71	72	72	80	80	79	78	77	86	dre_NK	non-transmembrane	fundc1	FUN14 domain containing 1 [Source:ZFIN;Acc:ZDB-GENE-040718-466]
ENSDARG00000040853	76	92	88	87	91	92	85	91	90	92	92	92	92	93	92	92	69	No.Diff.Exp	non-transmembrane	shoc2	SHOC2 leucine-rich repeat scaffold protein [Source:ZFIN;Acc:ZDB-GENE-050208-523]
ENSDARG00000040861	0	62	57	58	61	36	46	57	56	54	57	68	67	63	65	62	69	No.Diff.Exp	non-transmembrane	tcf25	transcription factor 25 (basic helix-loop-helix) [Source:ZFIN;Acc:ZDB-GENE-040905-2]
ENSDARG00000040864	0	0	0	0	0	0	0	0	0	0	0	0	0	0	0	0	0	No.Diff.Exp	non-transmembrane	si:dkey-286j15.1	si:dkey-286j15.1 [Source:ZFIN;Acc:ZDB-GENE-060503-447]
ENSDARG00000040884	42	28	45	56	54	57	39	58	54	51	56	66	68	28	54	62	72	No.Diff.Exp	non-transmembrane	mxi1	max interactor 1, dimerization protein [Source:ZFIN;Acc:ZDB-GENE-990415-151]
ENSDARG00000040917	32	79	79	80	51	80	49	79	80	49	79	85	83	85	36	0	86	No.Diff.Exp	non-transmembrane	cbfb	core-binding factor, beta subunit [Source:ZFIN;Acc:ZDB-GENE-980526-440]
ENSDARG00000040959	0	64	32	62.5	85	62	85	83	82	85	85	91	94	91	87.5	37	92	No.Diff.Exp	non-transmembrane	rabl3	RAB, member of RAS oncogene family-like 3 [Source:ZFIN;Acc:ZDB-GENE-040808-11]
ENSDARG00000040971	0	70	59	57	59	59	59	59	59	59	59	92	0	93	95	95	73	No.Diff.Exp	non-transmembrane	GABARAPL1	GABA(A) receptor-associated protein like 1 [Source:HGNC Symbol;Acc:HGNC:4068]
ENSDARG00000040988	82	74	85	83	85	81	73	80	76.6667	82	82	89	89	85	86	87	90	No.Diff.Exp	non-transmembrane	tpi1b	triosephosphate isomerase 1b [Source:ZFIN;Acc:ZDB-GENE-020416-4]
ENSDARG00000041060	0	42	38	32	0	36	32	43	43	43.5	45	56	57	0	54	54	66	dre_NK	non-transmembrane	zgc:92326	zgc:92326 [Source:ZFIN;Acc:ZDB-GENE-040718-159]
ENSDARG00000041086	0	0	0	0	0	0	0	0	0	0	0	76	77	70	74	72	78	No.Diff.Exp	transmembrane	CABZ01071180.1
ENSDARG00000041137	0	56	56	53	47	46	54	53	51	40	53	68	73	62	65	67	59	No.Diff.Exp	transmembrane	dhrs13a.3	dehydrogenase/reductase (SDR family) member 13a, duplicate 3 [Source:ZFIN;Acc:ZDB-GENE-041114-134]
ENSDARG00000041140	36	0	46	53	53	32	29	38	37	38	38	59	54	55	52	52	66	dre_Myel	non-transmembrane	ddb2	damage-specific DNA binding protein 2 [Source:ZFIN;Acc:ZDB-GENE-050419-169]
ENSDARG00000041155	34	88	85	59.6667	89	64	48	73.5	73.5	73.5	73.5	94	94	93	92	93	99	No.Diff.Exp	non-transmembrane	morf4l1	mortality factor 4 like 1 [Source:ZFIN;Acc:ZDB-GENE-040718-348]
ENSDARG00000041182	80	80	80	65	81	80	63	79	79	70	80	81	82	82	81	82	87	No.Diff.Exp	non-transmembrane	rpl4	ribosomal protein L4 [Source:ZFIN;Acc:ZDB-GENE-030131-9034]
ENSDARG00000041203	64	0	41	0	0	0	65	73	73	70	72	77	79	74	75	0	77	No.Diff.Exp	non-transmembrane	drap1	DR1-associated protein 1 (negative cofactor 2 alpha) [Source:ZFIN;Acc:ZDB-GENE-030131-400]
ENSDARG00000041217	67	72	70	64	73	72	48	72	72	73	73	77	77	10.5	77	78	68	No.Diff.Exp	non-transmembrane	xpo6	exportin 6 [Source:ZFIN;Acc:ZDB-GENE-030131-5912]
ENSDARG00000041232	0	98	96	0	96	95	0	94.5	96	95	95	95	96	93	98	98	93	No.Diff.Exp	non-transmembrane	rps29	ribosomal protein S29 [Source:ZFIN;Acc:ZDB-GENE-040622-5]
ENSDARG00000041299	0	72	78	79	43	63	24	79	37	46	79	93	93	65	94	56	0	No.Diff.Exp	non-transmembrane	MSI1 (2 of 3)	musashi RNA-binding protein 1 [Source:HGNC Symbol;Acc:HGNC:7330]
ENSDARG00000041314	0	82	67	80	79	49	0	75	76	77	78	85	86	77	81	33	85	No.Diff.Exp	non-transmembrane	ndufb9	NADH dehydrogenase (ubiquinone) 1 beta subcomplex, 9 [Source:ZFIN;Acc:ZDB-GENE-030131-8364]
ENSDARG00000041340	52	56	56	56	52	53	54	55	56	56	56	70	69	59	69	67	75	No.Diff.Exp	non-transmembrane	mrpl51	mitochondrial ribosomal protein L51 [Source:ZFIN;Acc:ZDB-GENE-050320-40]
ENSDARG00000041363	0	56	18	0	53	44	27	53	53	55	55	71	71	72	67	68	81	No.Diff.Exp	non-transmembrane	dctn3	dynactin 3 (p22) [Source:ZFIN;Acc:ZDB-GENE-040704-65]
ENSDARG00000041391	0	85	79	77	81	83	67	83	83	82	82	89	89	89	69	83	90	No.Diff.Exp	transmembrane	tmed10	transmembrane emp24-like trafficking protein 10 (yeast) [Source:ZFIN;Acc:ZDB-GENE-030131-4915]
ENSDARG00000041397	66	84	79	79	79	71	59	79	77	80	80	93	92	91	92	90	81	No.Diff.Exp	non-transmembrane	eif2b2	eukaryotic translation initiation factor 2B, subunit 2 beta [Source:ZFIN;Acc:ZDB-GENE-040426-2605]
ENSDARG00000041400	0	55	51	52	0	25	53	51	46.4	57	57	52	59	0	0	54	57	No.Diff.Exp	transmembrane	ndufa3	NADH dehydrogenase (ubiquinone) 1 alpha subcomplex, 3 [Source:ZFIN;Acc:ZDB-GENE-040801-18]
ENSDARG00000041402	0	50	45	49	49	42	45	49	49	48	48	53	54	43	52	55	62	No.Diff.Exp	non-transmembrane	zc3h14	zinc finger CCCH-type containing 14 [Source:ZFIN;Acc:ZDB-GENE-041014-257]
ENSDARG00000041421	26	61	66	66	35	66	67	67	67	31	67	74	76	71	73	37	47	No.Diff.Exp	non-transmembrane	taz	tafazzin [Source:ZFIN;Acc:ZDB-GENE-030131-684]
ENSDARG00000041435	0	95.5	98	41	0	98	98	95.25	98	98	98	99	98	97	97	97	75	No.Diff.Exp	non-transmembrane	uba52	ubiquitin A-52 residue ribosomal protein fusion product 1 [Source:ZFIN;Acc:ZDB-GENE-051023-7]
ENSDARG00000041450	75	93	95	95	96	93	83	96	96	96	96	97	97	97	97	0	100	No.Diff.Exp	non-transmembrane	rab11a	RAB11a, member RAS oncogene family [Source:ZFIN;Acc:ZDB-GENE-041114-53]
ENSDARG00000041505	45	62	49	49	54	51	48	58	58	58	58	65	65	61	56	41	29	No.Diff.Exp	transmembrane	itm2bb	integral membrane protein 2Bb [Source:ZFIN;Acc:ZDB-GENE-040426-2139]
ENSDARG00000041540	0	0	0	0	0	0	0	0	0	0	0	67	66.375	63	60.2	68.5	75.25	No.Diff.Exp	non-transmembrane	sult1st2	sulfotransferase family 1, cytosolic sulfotransferase 2 [Source:ZFIN;Acc:ZDB-GENE-030804-27]
ENSDARG00000041581	36	69	63	70	70	70	61	69	68	70	70	77	77	76	76	76	87	No.Diff.Exp	non-transmembrane	znf143b	zinc finger protein 143b [Source:ZFIN;Acc:ZDB-GENE-040426-1586]
ENSDARG00000041619	94	93	95	96	96	84	93	96	72	96	96	96	96	92	94	93	97	No.Diff.Exp	non-transmembrane	gnb2l1	guanine nucleotide binding protein (G protein), beta polypeptide 2-like 1 [Source:ZFIN;Acc:ZDB-GENE-990415-89]
ENSDARG00000041724	13	28	35	0	0	0	0	0	0	0	0	17	0	13.25	0	0	29	dre_NK	non-transmembrane	glipr2	GLI pathogenesis-related 2 [Source:ZFIN;Acc:ZDB-GENE-030131-4424]
ENSDARG00000041776	17.5	77	72	58	75	73	53	75.5	75	75.5	75.5	78	77	71	68	35	13	No.Diff.Exp	transmembrane	ndst3	N-deacetylase/N-sulfotransferase (heparan glucosaminyl) 3 [Source:ZFIN;Acc:ZDB-GENE-090312-199]
ENSDARG00000041811	70	84	85	86	86	63	85	85	79	85	85	82	83	78	83	83	90	No.Diff.Exp	non-transmembrane	rps25	ribosomal protein S25 [Source:ZFIN;Acc:ZDB-GENE-040426-1788]
ENSDARG00000041835	0	0	0	0	0	0	0	0	0	0	0	0	0	0	0	0	0	dre_NK	transmembrane	ccl38a.5	chemokine (C-C motif) ligand 38, duplicate 5 [Source:ZFIN;Acc:ZDB-GENE-041014-167]
ENSDARG00000041853	66	0	0	0	0	0	0	0	0	49	0	0	0	45	0	0	63	No.Diff.Exp	non-transmembrane	rbm39b	RNA binding motif protein 39b [Source:ZFIN;Acc:ZDB-GENE-050327-97]
ENSDARG00000041875	26	0	0	0	0	0	0	0	0	0	0	80	81	81	0	0	90	No.Diff.Exp	non-transmembrane	ube2v1	ubiquitin-conjugating enzyme E2 variant 1 [Source:ZFIN;Acc:ZDB-GENE-051030-102]
ENSDARG00000041878	75	0	94	0	0	0	0	0	0	0	0	0	0	0	0	0	0	No.Diff.Exp	non-transmembrane	rab11ba	RAB11B, member RAS oncogene family, a [Source:ZFIN;Acc:ZDB-GENE-040426-2860]
ENSDARG00000041887	31.5	85	82	84	83	84	73	84	84	85	85	78	89	87	87	49	92	No.Diff.Exp	non-transmembrane	sf3a1	splicing factor 3a, subunit 1 [Source:ZFIN;Acc:ZDB-GENE-030616-156]
ENSDARG00000041919	0	0	0	0	0	0	0	0	0	0	0	0	0	0	0	0	0	No.Diff.Exp	transmembrane	ccl38.1	chemokine (C-C motif) ligand 38, duplicate 1 [Source:ZFIN;Acc:ZDB-GENE-041014-320]
ENSDARG00000041921	0	89	0	83	82	82	84.6667	78	78	84	84	83	0	0	80	83	95	No.Diff.Exp	non-transmembrane	hsbp1b	heat shock factor binding protein 1b [Source:ZFIN;Acc:ZDB-GENE-040426-1721]
ENSDARG00000041923	0	0	0	0	0	0	0	0	0	0	0	0	0	0	0	0	0	dre_NK	transmembrane	ccl38.6	chemokine (C-C motif) ligand 38, duplicate 6 [Source:ZFIN;Acc:ZDB-GENE-041014-165]
ENSDARG00000041959	37	64	60	62	62	0	63	61	61	62	62	68	73	68	69	72	78	No.Diff.Exp	transmembrane	cxcr4b	chemokine (C-X-C motif), receptor 4b [Source:ZFIN;Acc:ZDB-GENE-010614-1]
ENSDARG00000041974	76	0	80	0	0	70	35	78	78	82	80	81	0	81	81	54	81	No.Diff.Exp	non-transmembrane	brk1	BRICK1, SCAR/WAVE actin-nucleating complex subunit [Source:ZFIN;Acc:ZDB-GENE-040625-77]
ENSDARG00000042056	11	68	70	53	62	71	68	71	71	72	72	70	70.5	68	70	70	62	No.Diff.Exp	non-transmembrane	mau2	MAU2 sister chromatid cohesion factor [Source:ZFIN;Acc:ZDB-GENE-050522-383]
ENSDARG00000042151	0	69	65	24.5	68	60	56	65	63	60	65	74	70	67	0	0	63	No.Diff.Exp	non-transmembrane	skia	v-ski avian sarcoma viral oncogene homolog a [Source:ZFIN;Acc:ZDB-GENE-990715-9]
ENSDARG00000042236	0	59	58	57	58	54	43	57	58	44	58	64	65	60	60	61	56	No.Diff.Exp	non-transmembrane	atrx	alpha thalassemia/mental retardation syndrome X-linked homolog (human) [Source:ZFIN;Acc:ZDB-GENE-030912-11]
ENSDARG00000042252	63	70	65	71	44	42	63	68	68	67	67	73	77	68	73	70	81	No.Diff.Exp	non-transmembrane	eif4h	eukaryotic translation initiation factor 4h [Source:ZFIN;Acc:ZDB-GENE-010328-19]
ENSDARG00000042308	18	50	41	0	50	43	47	48	49	51	50.5	51	57	57	60	57	72	No.Diff.Exp	non-transmembrane	arhgef18b	rho/rac guanine nucleotide exchange factor (GEF) 18b [Source:ZFIN;Acc:ZDB-GENE-070705-462]
ENSDARG00000042319	0	39	35	37	39	0	0	37	36	37	37	49	49	23	48	48	60	No.Diff.Exp	transmembrane	cdca4	cell division cycle associated 4 [Source:ZFIN;Acc:ZDB-GENE-030131-1695]
ENSDARG00000042322	0	0	35	35	34	0	0	0	0	0	0	32	33	0	32	0	62	No.Diff.Exp	non-transmembrane	si:dkey-177p2.6	si:dkey-177p2.6 [Source:ZFIN;Acc:ZDB-GENE-030131-5926]
ENSDARG00000042345	0	0	0	0	0	0	0	0	0	0	0	0	0	0	0	0	0	No.Diff.Exp	non-transmembrane	si:dkeyp-55f12.3	si:dkeyp-55f12.3 [Source:ZFIN;Acc:ZDB-GENE-041001-118]
ENSDARG00000042492	0	33	0	0	0	0	0	0	0	0	0	61	62	58	58	0	71	No.Diff.Exp	non-transmembrane	si:dkey-250d21.1	si:dkey-250d21.1 [Source:ZFIN;Acc:ZDB-GENE-030131-8276]
ENSDARG00000042533	0	79	66	55.3333	0	60	40	56.625	60.3333	63.5	63.8	72	77	79	72	84	49.5	dre_Tcell	non-transmembrane	gstm.1	glutathione S-transferase mu, tandem duplicate 1 [Source:ZFIN;Acc:ZDB-GENE-030911-2]
ENSDARG00000042534	0	68	65	69	68	59	56	69	68	69	68	70	70	68	68	69	70	No.Diff.Exp	non-transmembrane	rsrc2	arginine/serine-rich coiled-coil 2 [Source:ZFIN;Acc:ZDB-GENE-040426-2457]
ENSDARG00000042539	76	33	77	75.5	76.5	75	64.5	76	74	75.5	75.5	0	0	0	0	53	90	No.Diff.Exp	non-transmembrane	ywhaqa	tyrosine 3-monooxygenase/tryptophan 5-monooxygenase activation protein, theta polypeptide a [Source:ZFIN;Acc:ZDB-GENE-040122-5]
ENSDARG00000042566	92	88	96	96	96	89	96	81.6667	79.6667	95	96	91	79	89	97	96	29	No.Diff.Exp	non-transmembrane	rps7	ribosomal protein S7 [Source:ZFIN;Acc:ZDB-GENE-040426-1718]
ENSDARG00000042590	0	37	56	58	60	46	52	59	60	60	60	66	67	60	64	26	70	No.Diff.Exp	non-transmembrane	rbm19	RNA binding motif protein 19 [Source:ZFIN;Acc:ZDB-GENE-031125-3]
ENSDARG00000042620	15	0	0	0	0	0	0	0	0	0	0	54.5	58.2	62	45	61.5	0	No.Diff.Exp	non-transmembrane	gstr	glutathione S-transferase rho [Source:ZFIN;Acc:ZDB-GENE-090507-1]
ENSDARG00000042621	27	62	56	40	58	61	45	61	61	60	61	46	40	50	47	46	71	No.Diff.Exp	non-transmembrane	cryaba	crystallin, alpha B, a [Source:ZFIN;Acc:ZDB-GENE-991119-2]
ENSDARG00000042623	0	69	61	68	68	62	66	66	66	68	68	74	76	71	76	69	81	No.Diff.Exp	non-transmembrane	acbd3	acyl-Coenzyme A binding domain containing 3 [Source:ZFIN;Acc:ZDB-GENE-040426-1930]
ENSDARG00000042642	48	71	70	71	72	71	41	70	70	71	71	76	77	73	77	77	89	No.Diff.Exp	non-transmembrane	wtap	Wilms tumor 1 associated protein [Source:ZFIN;Acc:ZDB-GENE-030131-5990]
ENSDARG00000042644	74	78	81	80	81	49	33	80	79	80	80	88	88	82	85	86	89	No.Diff.Exp	non-transmembrane	sod2	superoxide dismutase 2, mitochondrial [Source:ZFIN;Acc:ZDB-GENE-030131-7742]
ENSDARG00000042660	0	55	70	0	0	39	0	70	67	71	71	74	73	68	74	73	83	No.Diff.Exp	non-transmembrane	fam32a	family with sequence similarity 32, member A [Source:ZFIN;Acc:ZDB-GENE-040704-44]
ENSDARG00000042667	0	55	54	0	53	41	0	46	46	44	45	0	0	0	0	0	0	No.Diff.Exp	non-transmembrane	klf2a	Kruppel-like factor 2a [Source:ZFIN;Acc:ZDB-GENE-011109-1]
ENSDARG00000042670	50	73	68	29	71	66	56	70	70	68	71	0	73	77	76	25	74	No.Diff.Exp	non-transmembrane	eps15l1a	epidermal growth factor receptor pathway substrate 15-like 1a [Source:ZFIN;Acc:ZDB-GENE-060503-274]
ENSDARG00000042703	48	39.5	67	78	79	25	57	78	77	57	79	89	90	82	85	89	45.5	No.Diff.Exp	non-transmembrane	parp6a	poly (ADP-ribose) polymerase family, member 6a [Source:ZFIN;Acc:ZDB-GENE-040718-272]
ENSDARG00000042708	0	96	96	70	86	0	88	90	90	90	90	86	85	86	84	80	97	No.Diff.Exp	non-transmembrane	tuba8l	tubulin, alpha 8 like [Source:ZFIN;Acc:ZDB-GENE-030131-9167]
ENSDARG00000042724	78	88	87	88	88	87	77	87	84	88	88	82	92	79	91	89	95	No.Diff.Exp	non-transmembrane	supt5h	suppressor of Ty 5 homolog (S. cerevisiae) [Source:ZFIN;Acc:ZDB-GENE-001207-1]
ENSDARG00000042725	20	37	37	36	34	35	34	34	36	33	35	41	49	48	48	0	51	No.Diff.Exp	non-transmembrane	cebpb	CCAAT/enhancer binding protein (C/EBP), beta [Source:ZFIN;Acc:ZDB-GENE-020111-3]
ENSDARG00000042726	10	45	43	49	50	48	44	49	49	49	49	45	56	52	59	57	65	No.Diff.Exp	non-transmembrane	GRB7	growth factor receptor-bound protein 7 [Source:HGNC Symbol;Acc:HGNC:4567]
ENSDARG00000042777	43	51	59	0	60	48	41	47	47	46	40	64	0	64	21	64	70	No.Diff.Exp	transmembrane	ndufa11	NADH dehydrogenase (ubiquinone) 1 alpha subcomplex, 11 [Source:ZFIN;Acc:ZDB-GENE-040426-1631]
ENSDARG00000042796	69	0	89	52	52	43	3	57.5	49.3333	56.5	60.3333	0	0	0	0	0	94	No.Diff.Exp	non-transmembrane	yy1a	YY1 transcription factor a [Source:ZFIN;Acc:ZDB-GENE-030131-1117]
ENSDARG00000042823	0	58	38	73	70	70	0	70	70	70	70	85	85	75	82	83	45	No.Diff.Exp	transmembrane	spcs2	signal peptidase complex subunit 2 [Source:ZFIN;Acc:ZDB-GENE-050320-32]
ENSDARG00000042835	23	63	55	55	65	62	59	57	61	58	63	0	0	0	0	0	80	No.Diff.Exp	non-transmembrane	tfdp2	transcription factor Dp-2 [Source:ZFIN;Acc:ZDB-GENE-030219-104]
ENSDARG00000042837	36	59	52	52	53	52	27	49	49	52	52	67	68	0	59	21	69	dre_NK	transmembrane	atp1b3b	ATPase, Na+/K+ transporting, beta 3b polypeptide [Source:ZFIN;Acc:ZDB-GENE-001127-1]
ENSDARG00000042853	0	77	75	77	76	63	70	73	73	74	74	85	85	80	85	85	87	No.Diff.Exp	transmembrane	ivd	isovaleryl-CoA dehydrogenase [Source:ZFIN;Acc:ZDB-GENE-030616-262]
ENSDARG00000042856	21	42	40	36	48	41	40	49	49	49	50	53	58	52	55	57	53	No.Diff.Exp	non-transmembrane	itpka	inositol-trisphosphate 3-kinase A [Source:ZFIN;Acc:ZDB-GENE-030616-116]
ENSDARG00000042864	53	51	0	62	66	62	0	58	57	60	60	0	73	68	70	36.5	77	No.Diff.Exp	non-transmembrane	rpl7l1	ribosomal protein L7-like 1 [Source:ZFIN;Acc:ZDB-GENE-030131-970]
ENSDARG00000042876	0	0	0	75	80	79	65.5	80	81	79	79	74	83	78	77	0	88	No.Diff.Exp	non-transmembrane	abracl	ABRA C-terminal like [Source:ZFIN;Acc:ZDB-GENE-030131-8594]
ENSDARG00000042880	14.5	22.6667	24	0	0	0	0	0	0	0	0	18	19.0909	0	20	0	32	No.Diff.Exp	transmembrane	si:ch211-222f23.6	si:ch211-222f23.6 [Source:ZFIN;Acc:ZDB-GENE-070912-208]
ENSDARG00000042905	88	65.5	93	92	93	64	93	92	87.6667	92	92	84	93	92	93	94	95	No.Diff.Exp	non-transmembrane	rpl10a	ribosomal protein L10a [Source:ZFIN;Acc:ZDB-GENE-030131-2025]
ENSDARG00000042925	0	48	0	23.5	47	41	42	49	49	44	49	56	54	52	55	41	59	No.Diff.Exp	transmembrane	mfng	MFNG O-fucosylpeptide 3-beta-N-acetylglucosaminyltransferase [Source:ZFIN;Acc:ZDB-GENE-041130-1]
ENSDARG00000042927	0	66	66	65	67	68	48	69	69	62	69	0	0	47	0	0	68	No.Diff.Exp	non-transmembrane	mapre1a	microtubule-associated protein, RP/EB family, member 1a [Source:ZFIN;Acc:ZDB-GENE-030131-6067]
ENSDARG00000042969	0	0	0	0	0	0	0	0	0	0	0	6.66667	9	9	10	5	21	No.Diff.Exp	non-transmembrane	znf1035	zinc finger protein 1035 [Source:ZFIN;Acc:ZDB-GENE-050309-241]
ENSDARG00000042972	0	0	0	0	0	0	0	0	0	0	0	0	0	0	0	0	36	No.Diff.Exp	transmembrane	zgc:136605	zgc:136605 [Source:ZFIN;Acc:ZDB-GENE-060312-11]
ENSDARG00000042989	0	0	20	0	0	0	0	0	0	0	0	33	19	14	17	0	26	No.Diff.Exp	non-transmembrane	si:dkeyp-84f3.5	si:dkeyp-84f3.5 [Source:ZFIN;Acc:ZDB-GENE-050208-162]
ENSDARG00000043019	0	84	81	83	82	79	68	85	67	85	85	90	91	91	90	85	94	No.Diff.Exp	non-transmembrane	exoc1	exocyst complex component 1 [Source:ZFIN;Acc:ZDB-GENE-030131-1057]
ENSDARG00000043046	42	54	52	56	56	42	37	56	57	57	58	63	64	12	62	62	63	No.Diff.Exp	non-transmembrane	fbxl5	F-box and leucine-rich repeat protein 5 [Source:ZFIN;Acc:ZDB-GENE-030131-900]
ENSDARG00000043130	0	57	53	0	54	55	46	55	55	0	55	63	68	25	66	66	69	No.Diff.Exp	transmembrane	notch2	notch 2 [Source:ZFIN;Acc:ZDB-GENE-000329-4]
ENSDARG00000043154	79	80	81	71	68	75.5	73.5	76	76	76	76	80	80	0	78	79	87	No.Diff.Exp	non-transmembrane	ucp2	uncoupling protein 2 [Source:ZFIN;Acc:ZDB-GENE-990708-8]
ENSDARG00000043249	25	39	41	40	44	45	35	44	45	46	46	58	57	34	51	41	72	No.Diff.Exp	transmembrane	irf1b	interferon regulatory factor 1b [Source:ZFIN;Acc:ZDB-GENE-041114-13]
ENSDARG00000043257	0	83	86	45.6667	81	62	77.3333	84	85	86	86	91	92	89	93	91	93	dre_Myel	non-transmembrane	ckbb	creatine kinase, brain b [Source:ZFIN;Acc:ZDB-GENE-020103-2]
ENSDARG00000043371	59	88	85	84	85	77	67	85	85	85	85	91	90	0	91	90	89	No.Diff.Exp	non-transmembrane	mdh2	malate dehydrogenase 2, NAD (mitochondrial) [Source:ZFIN;Acc:ZDB-GENE-040426-2143]
ENSDARG00000043395	0	71	68	62	56	61	38	61	64	67	68	0	0	0	0	0	69	No.Diff.Exp	non-transmembrane	crip3	cysteine-rich protein 3 [Source:ZFIN;Acc:ZDB-GENE-130530-620]
ENSDARG00000043398	0	0	0	0	0	0	0	0	0	0	0	0	0	0	0	0	26.5	dre_NK	transmembrane	nitr2a	novel immune-type receptor 2a [Source:ZFIN;Acc:ZDB-GENE-020225-28]
ENSDARG00000043426	0	0	0	0	0	0	0	0	0	0	0	20	27	14.1667	11	20	30.25	No.Diff.Exp	transmembrane	CABZ01058867.1
ENSDARG00000043447	15	34.5	0	0	32	22	0	0	0	0	0	0	0	0	0	0	53	dre_Tcell	transmembrane	gpr55a	G protein-coupled receptor 55a [Source:ZFIN;Acc:ZDB-GENE-051113-260]
ENSDARG00000043448	0	0	0	45	62	59	50	58	58	58	58	73	74	0	71	71	0	No.Diff.Exp	transmembrane	itm2ca	integral membrane protein 2Ca [Source:ZFIN;Acc:ZDB-GENE-040718-284]
ENSDARG00000043453	0	94	93	94	0	86	68	96	95	96	96	95	95	95	94	67	94	No.Diff.Exp	non-transmembrane	rps5	ribosomal protein S5 [Source:ZFIN;Acc:ZDB-GENE-020419-12]
ENSDARG00000043467	0	0	0	0	0	33	0	36.5	37	41	41	49	0	0	41	0	53	No.Diff.Exp	transmembrane	ndufb11	NADH dehydrogenase (ubiquinone) 1 beta subcomplex, 11 [Source:ZFIN;Acc:ZDB-GENE-050309-25]
ENSDARG00000043468	0	35	31	33	36	33	20	35	35	35	35	35	31	24	34	35	0	No.Diff.Exp	non-transmembrane	sytl3	synaptotagmin-like 3 [Source:ZFIN;Acc:ZDB-GENE-040724-150]
ENSDARG00000043475	0	33	28	30	32	23	26	28	28	30	30	32	35	31	36	34	40	No.Diff.Exp	non-transmembrane	tagapb	T-cell activation RhoGTPase activating protein b [Source:ZFIN;Acc:ZDB-GENE-040724-50]
ENSDARG00000043484	88	0	0	0	0	0	0	0	0	0	0	97	97	94	97	97	72	No.Diff.Exp	non-transmembrane	ube2d2	ubiquitin-conjugating enzyme E2D 2 (UBC4/5 homolog, yeast) [Source:ZFIN;Acc:ZDB-GENE-120312-1]
ENSDARG00000043493	85	0	0	0	0	0	0	0	0	0	0	50.5	97	94.5	96	8.28571	71	No.Diff.Exp	non-transmembrane	cltca	clathrin, heavy chain a (Hc) [Source:ZFIN;Acc:ZDB-GENE-030131-2299]
ENSDARG00000043509	67	94	94	94	0	94	95	92.3333	77	67	95	99	96	94	97	98	98	No.Diff.Exp	non-transmembrane	rpl11	ribosomal protein L11 [Source:ZFIN;Acc:ZDB-GENE-040625-147]
ENSDARG00000043511	0	70	69	75	74	65	25	66	69	70	70	74	75	76	76	65	80	No.Diff.Exp	non-transmembrane	prdx6	peroxiredoxin 6 [Source:ZFIN;Acc:ZDB-GENE-040426-1778]
ENSDARG00000043555	60	77	75	62	75	55	66	69	69	70	70	79	82	80	0	0	86	No.Diff.Exp	transmembrane	tmem30ab	transmembrane protein 30Ab [Source:ZFIN;Acc:ZDB-GENE-030131-5884]
ENSDARG00000043571	62	23	82	67.5	64	73	83	64.5	66	46.5	66	88	86	86	80	85	88	No.Diff.Exp	non-transmembrane	KIF2A	kinesin heavy chain member 2A [Source:HGNC Symbol;Acc:HGNC:6318]
ENSDARG00000043593	0	68	70	18	69	66	48	68	69	67	67	75	76	73	74	71	40	No.Diff.Exp	non-transmembrane	rapgef1a	Rap guanine nucleotide exchange factor (GEF) 1a [Source:ZFIN;Acc:ZDB-GENE-081105-26]
ENSDARG00000043608	0	0	0	0	0	0	0	0	0	0	0	62	66	60.5	0	58	74	No.Diff.Exp	non-transmembrane	eif4ebp1	eukaryotic translation initiation factor 4E binding protein 1 [Source:ZFIN;Acc:ZDB-GENE-030131-2332]
ENSDARG00000043631	0	85	77	82	83	67	31	83	84	83	83	91	91	72	87	89	91	No.Diff.Exp	non-transmembrane	bcas2	breast carcinoma amplified sequence 2 [Source:ZFIN;Acc:ZDB-GENE-030408-5]
ENSDARG00000043680	0	35	12	31	31	31	31	38	38	39	40	40	40	30	33	33	42	No.Diff.Exp	non-transmembrane	ylpm1	YLP motif containing 1 [Source:ZFIN;Acc:ZDB-GENE-030131-2196]
ENSDARG00000043684	62	70	69	70	67	63	0	68	68	69	69	75	75	73	73	72	80	No.Diff.Exp	non-transmembrane	bpnt1	bisphosphate nucleotidase 1 [Source:ZFIN;Acc:ZDB-GENE-040718-46]
ENSDARG00000043732	83	94	89	42	95	87	0	95	94	95	95	94	94	94	93	93	97	No.Diff.Exp	non-transmembrane	cops4	COP9 constitutive photomorphogenic homolog subunit 4 (Arabidopsis) [Source:ZFIN;Acc:ZDB-GENE-030131-4317]
ENSDARG00000043757	30	85	81	82	66	75	50	82	81	82	82	66	69	0	64	67	79	No.Diff.Exp	non-transmembrane	ptbp3	polypyrimidine tract binding protein 3 [Source:ZFIN;Acc:ZDB-GENE-091116-1]
ENSDARG00000043781	66	72	60	0	0	61	48	61	61	62	62	80	83	72	77	77	23	dre_Tcell	non-transmembrane	PSMB10	proteasome subunit beta 10 [Source:HGNC Symbol;Acc:HGNC:9538]
ENSDARG00000043795	0	72	53	73	75	75	76	76	76	75	62	78.3333	73	67	70.5	72.5	66	No.Diff.Exp	non-transmembrane	arhgdia	Rho GDP dissociation inhibitor (GDI) alpha [Source:ZFIN;Acc:ZDB-GENE-040426-2816]
ENSDARG00000043797	79	86	75	83	85	84	59.5	84	84	80	84	82	81	80	79	78	88	No.Diff.Exp	non-transmembrane	cdc5l	CDC5 cell division cycle 5-like (S. pombe) [Source:ZFIN;Acc:ZDB-GENE-040426-821]
ENSDARG00000043842	0	45	37	0	22	38	42	36	37	25	40	61	62	61	58	49	67	No.Diff.Exp	non-transmembrane	C20H1orf198	chromosome 1 open reading frame 198 [Source:HGNC Symbol;Acc:HGNC:25900]
ENSDARG00000043848	0	67	69	57	66	70	40	71	70	70	70	81	82	77	81	79	85	No.Diff.Exp	non-transmembrane	sod1	superoxide dismutase 1, soluble [Source:ZFIN;Acc:ZDB-GENE-990415-258]
ENSDARG00000043856	0	84	81	84	83	75	84	79	79	80	80	93	90	82	91	85.5	94	No.Diff.Exp	non-transmembrane	amd1	adenosylmethionine decarboxylase 1 [Source:ZFIN;Acc:ZDB-GENE-040426-760]
ENSDARG00000043857	0	54	86	88	89	73	69	91	90	90	73	92	0	0	92	0	0	No.Diff.Exp	non-transmembrane	ufm1	ubiquitin-fold modifier 1 [Source:ZFIN;Acc:ZDB-GENE-040426-2930]
ENSDARG00000043873	37	48	46	49	51	46	38	50	49	50	50	45	43	35	38	39	58	No.Diff.Exp	non-transmembrane	arid4a	AT rich interactive domain 4A (RBP1-like) [Source:ZFIN;Acc:ZDB-GENE-050809-105]
ENSDARG00000043928	0	52	0	61	69	72	64	71	71	72	72	75	79	78	76	78	0	No.Diff.Exp	non-transmembrane	gpn1	GPN-loop GTPase 1 [Source:ZFIN;Acc:ZDB-GENE-040801-154]
ENSDARG00000043932	0	72	73	0	76	74	62	75	75	69	75	57	65	0	52	53	0	No.Diff.Exp	non-transmembrane	stmn4l	stathmin-like 4, like [Source:ZFIN;Acc:ZDB-GENE-040718-301]
ENSDARG00000043960	0	69	69	69	72	71	51	69	69	71	71	76	73	62	71	66	0	No.Diff.Exp	non-transmembrane	rpf2	ribosome production factor 2 homolog [Source:ZFIN;Acc:ZDB-GENE-040426-2501]
ENSDARG00000043976	90	0	96	96	96	88	96	96	96	96	96	98	98	97	98	98	89.5	No.Diff.Exp	non-transmembrane	etf1b	eukaryotic translation termination factor 1b [Source:ZFIN;Acc:ZDB-GENE-021029-1]
ENSDARG00000044001	26.5	0	0	0	0	0	0	0	0	0	0	53	50	35	44	42	33	No.Diff.Exp	non-transmembrane	lgals3l	lectin, galactoside-binding, soluble, 3 (galectin 3)-like [Source:ZFIN;Acc:ZDB-GENE-030131-4324]
ENSDARG00000044023	0	0	0	0	0	0	0	0	0	0	0	43	36	0	44	29	39	No.Diff.Exp	transmembrane	nkl.4	NK-lysin tandem duplicate 4 [Source:ZFIN;Acc:ZDB-GENE-030131-7503]
ENSDARG00000044039	48	55	49	47	48	0	51	50	50	50	49	41	47	0	56	43	76	No.Diff.Exp	non-transmembrane	stx11a	syntaxin 11a [Source:ZFIN;Acc:ZDB-GENE-040426-2564]
ENSDARG00000044044	43	51	54	48	53	53	51	54	54	54	54	57	58	56	56	58	62	No.Diff.Exp	non-transmembrane	rassf2b	Ras association (RalGDS/AF-6) domain family member 2b [Source:ZFIN;Acc:ZDB-GENE-041221-6]
ENSDARG00000044073	0	57	63	56	66	64	0	62	63	64	64	69	69	70	68	70	73	No.Diff.Exp	transmembrane	fuca2	fucosidase, alpha-L- 2, plasma [Source:ZFIN;Acc:ZDB-GENE-040822-39]
ENSDARG00000044083	0	0	88	0	90	0	0	0	0	0	0	92	91	81	89	79.5	92	dre_Tcell	non-transmembrane	peli1b	pellino E3 ubiquitin protein ligase 1b [Source:ZFIN;Acc:ZDB-GENE-061027-372]
ENSDARG00000044092	0	59	69	47	0	46	0	41	43	46	46	80	80	67	66	0	80	No.Diff.Exp	non-transmembrane	atpif1b	ATPase inhibitory factor 1b [Source:ZFIN;Acc:ZDB-GENE-050506-113]
ENSDARG00000044093	88	82	88	88	0	85	66	81.5	84	85.5	86	93	91	90	93	46	91	No.Diff.Exp	non-transmembrane	rpl13a	ribosomal protein L13a [Source:ZFIN;Acc:ZDB-GENE-030131-168]
ENSDARG00000044153	36	96	73	96	96	96	46	96	96	96	96	94	97	97	97	97	97	No.Diff.Exp	non-transmembrane	ppp1cb	protein phosphatase 1, catalytic subunit, beta isozyme [Source:ZFIN;Acc:ZDB-GENE-030616-609]
ENSDARG00000044225	26	85	58	78	84	66	47	86	86	85	85	0	0	0	0	0	86	No.Diff.Exp	non-transmembrane	GOLPH3 (1 of 2)	golgi phosphoprotein 3 (coat-protein) [Source:HGNC Symbol;Acc:HGNC:15452]
ENSDARG00000044241	25	29	0	56	0	49	23	54	38	52	52	71	71	49	70	68	34	No.Diff.Exp	transmembrane	dram2b	DNA-damage regulated autophagy modulator 2b [Source:ZFIN;Acc:ZDB-GENE-040625-141]
ENSDARG00000044267	0	80	80	83	82	81	81	72.5	81	80	81	86	88	66	86	88	91	No.Diff.Exp	non-transmembrane	sumo1	small ubiquitin-like modifier 1 [Source:ZFIN;Acc:ZDB-GENE-040426-2186]
ENSDARG00000044281	7	61	60	54	64	62	47	63	49	62	63	19	72	53	71	70	73	No.Diff.Exp	non-transmembrane	erbb2ip	erbb2 interacting protein [Source:ZFIN;Acc:ZDB-GENE-061103-403]
ENSDARG00000044282	0	57	55	54	47	41	33	56	56	57	57	65	66	57	62	63	63	No.Diff.Exp	non-transmembrane	smc5	structural maintenance of chromosomes 5 [Source:ZFIN;Acc:ZDB-GENE-061013-288]
ENSDARG00000044295	53	62	59	67	67	55	46	66	66	66	66	73	73	65	49	14	83	No.Diff.Exp	non-transmembrane	pip5k1ba	phosphatidylinositol-4-phosphate 5-kinase, type I, beta a [Source:ZFIN;Acc:ZDB-GENE-041010-81]
ENSDARG00000044299	17	61	65	67	66	51	28	67	68	68	68	31	0	60	58	61	78	No.Diff.Exp	non-transmembrane	lmnb1	lamin B1 [Source:ZFIN;Acc:ZDB-GENE-020424-2]
ENSDARG00000044301	54	65	60	57	66	40	0	55	55	55	55	73	75	63	65	71	85	No.Diff.Exp	non-transmembrane	atf1	activating transcription factor 1 [Source:ZFIN;Acc:ZDB-GENE-030131-4334]
ENSDARG00000044332	0	64	73	75	77	64	57	75	64	77	77	82	82	69	79	63	89	No.Diff.Exp	non-transmembrane	zranb2	zinc finger, RAN-binding domain containing 2 [Source:ZFIN;Acc:ZDB-GENE-040426-2743]
ENSDARG00000044345	48	90	89	86	92	83	68	92	92	92	92	94	93	91	94	94	96	dre_Myel	non-transmembrane	cyfip1	cytoplasmic FMR1 interacting protein 1 [Source:ZFIN;Acc:ZDB-GENE-030131-8557]
ENSDARG00000044357	9	60	75	76	77	67	57	74	76	74	77	86	86	81	84	83	90	No.Diff.Exp	non-transmembrane	tbc1d23	TBC1 domain family, member 23 [Source:ZFIN;Acc:ZDB-GENE-040426-1253]
ENSDARG00000044365	18	52	46	42	48	44	27	45	44	44	44	56.5	54	51.5	58	50	75	No.Diff.Exp	transmembrane	angptl3	angiopoietin-like 3 [Source:ZFIN;Acc:ZDB-GENE-010817-3]
ENSDARG00000044457	0	71	64	68	68	68	0	66	66	43	68	45.5	72	67	67	65	70	dre_Tcell	non-transmembrane	gfi1ab	growth factor independent 1A transcription repressor b [Source:ZFIN;Acc:ZDB-GENE-040116-8]
ENSDARG00000044513	0	0	0	0	0	0	0	0	0	0	0	60	61	59	62	60	72	No.Diff.Exp	transmembrane	tpst1l	tyrosylprotein sulfotransferase 1, like [Source:ZFIN;Acc:ZDB-GENE-040316-1]
ENSDARG00000044521	0	69	81	80	79	80	80	81	60.5	80	80	72.5	74	80	74	73.5	51	No.Diff.Exp	non-transmembrane	eef1b2	eukaryotic translation elongation factor 1 beta 2 [Source:ZFIN;Acc:ZDB-GENE-030131-7310]
ENSDARG00000044524	38	57	52	56	58	56	41	57	57	56	56	0	0	0	0	0	42	No.Diff.Exp	transmembrane	def6b	differentially expressed in FDCP 6b homolog (mouse) [Source:ZFIN;Acc:ZDB-GENE-110408-59]
ENSDARG00000044561	31	48	42	45	48	49	42	48	48	48	48	49	48	37	0	0	63	dre_Tcell	transmembrane	ccr7	chemokine (C-C motif) receptor 7 [Source:ZFIN;Acc:ZDB-GENE-060522-2]
ENSDARG00000044562	85.5	94	91	86	0	0	0	86	0	0	0	86	90	91	88	68	96	No.Diff.Exp	non-transmembrane	cycsb	cytochrome c, somatic b [Source:ZFIN;Acc:ZDB-GENE-040625-38]
ENSDARG00000044565	30	87	85	85	86	86	72	87	86	87	87	90	91	85	90	65	95	No.Diff.Exp	non-transmembrane	ola1	Obg-like ATPase 1 [Source:ZFIN;Acc:ZDB-GENE-030131-5063]
ENSDARG00000044573	0	77	99	0	99	78	83	99	99	99	99	100	100	0	100	0	100	No.Diff.Exp	non-transmembrane	cdc42	cell division cycle 42 [Source:ZFIN;Acc:ZDB-GENE-030131-8783]
ENSDARG00000044601	0	47	41	46	46	46	30	46	45	45	46	47.5	53	41	50	45.5	51	dre_Tcell	transmembrane	rtn4a	reticulon 4a [Source:ZFIN;Acc:ZDB-GENE-030710-1]
ENSDARG00000044619	0	58	48	51	56	51.5	42	50.5	51	52.5	52.5	77	68	75	78	78	88	No.Diff.Exp	non-transmembrane	birc2	baculoviral IAP repeat containing 2 [Source:ZFIN;Acc:ZDB-GENE-030825-6]
ENSDARG00000044625	0	43	41	41	43	42	40	45	45	42	45	42	43	36	40	39	55	dre_Tcell	non-transmembrane	pcf11	PCF11 cleavage and polyadenylation factor subunit [Source:ZFIN;Acc:ZDB-GENE-041114-175]
ENSDARG00000044669	26	34	31	35	38	32	26	35	33	36	36	39	39	29	33	36	54	No.Diff.Exp	non-transmembrane	hp1bp3	heterochromatin protein 1, binding protein 3 [Source:ZFIN;Acc:ZDB-GENE-060810-79]
ENSDARG00000044755	49	55	53	53	55	57	0	54	55	55	55	59	52	0	59	57	61	No.Diff.Exp	transmembrane	GCNT4 (2 of 3)	glucosaminyl (N-acetyl) transferase 4, core 2 [Source:HGNC Symbol;Acc:HGNC:17973]
ENSDARG00000044760	73	0	0	0	0	0	0	0	0	0	0	79	86	86	85	0	85	No.Diff.Exp	transmembrane	gnaia	guanine nucleotide binding protein (G protein), alpha inhibiting activity polypeptide a [Source:ZFIN;Acc:ZDB-GENE-030131-2229]
ENSDARG00000044797	0	0	0	0	0	0	0	0	0	0	0	34	31	23	33	32	31	dre_Tcell	transmembrane	cd8a	CD8a molecule [Source:ZFIN;Acc:ZDB-GENE-060210-2]
ENSDARG00000044811	33	89	88	45	82	86	69	85	85	85	85	96	97	92	95	84	98	No.Diff.Exp	non-transmembrane	cdk9	cyclin-dependent kinase 9 (CDC2-related kinase) [Source:ZFIN;Acc:ZDB-GENE-030131-321]
ENSDARG00000044852	0	43	55	58	37	28	0	33	34	32	32	64	67	51	60	57	69	No.Diff.Exp	non-transmembrane	wbp2nl	WBP2 N-terminal like [Source:ZFIN;Acc:ZDB-GENE-030131-4012]
ENSDARG00000044915	27	60	51	62	62	60	47	62	62	63	63	78	79	75	77	77	84	No.Diff.Exp	non-transmembrane	sfmbt1	Scm-like with four mbt domains 1 [Source:ZFIN;Acc:ZDB-GENE-030131-2592]
ENSDARG00000044935	22	0	76	71	77	70	0	68	69	71	70	87	68	81	0	0	88	No.Diff.Exp	non-transmembrane	hpdb	4-hydroxyphenylpyruvate dioxygenase b [Source:ZFIN;Acc:ZDB-GENE-040808-62]
ENSDARG00000045011	0	29	22	0	24	26	29	26	25	27	27	56	57	39	51	0	63	No.Diff.Exp	transmembrane	TAPBP (1 of 2)	TAP binding protein (tapasin) [Source:HGNC Symbol;Acc:HGNC:11566]
ENSDARG00000045017	0	58	43	47	41	59	44	60	59	58	58	69	72	68	66	0	59	No.Diff.Exp	non-transmembrane	pdrg1	p53 and DNA-damage regulated 1 [Source:ZFIN;Acc:ZDB-GENE-050417-276]
ENSDARG00000045019	53	54	59	60.5	62	61	61	62	62	62	62	66	67	48	66	68	61	No.Diff.Exp	non-transmembrane	aamp	angio-associated, migratory cell protein [Source:ZFIN;Acc:ZDB-GENE-040426-2370]
ENSDARG00000045066	40	42	55	47	51	37	34	52	49.5	53	52	58	56	51	56	57	70	No.Diff.Exp	transmembrane	entpd1	ectonucleoside triphosphate diphosphohydrolase 1 [Source:ZFIN;Acc:ZDB-GENE-040801-58]
ENSDARG00000045075	31	41	0	33	0	0	21	32	32	33	33	49	48	38	44	46	62	No.Diff.Exp	transmembrane	tmem106a	transmembrane protein 106A [Source:ZFIN;Acc:ZDB-GENE-030131-5129]
ENSDARG00000045155	100	75	100	100	95	100	84	100	100	100	100	92	100	91	100	100	100	No.Diff.Exp	non-transmembrane	phf5a	PHD finger protein 5A [Source:ZFIN;Acc:ZDB-GENE-021219-3]
ENSDARG00000045200	34	60	55	59	60	54	48	61	60	44	61	59	60	54	60	33	67	No.Diff.Exp	non-transmembrane	dusp19b	dual specificity phosphatase 19b [Source:ZFIN;Acc:ZDB-GENE-040502-1]
ENSDARG00000045224	0	0	23	0	0	0	0	0	0	0	0	0	0	0	0	0	54	No.Diff.Exp	transmembrane	glipr1a	GLI pathogenesis-related 1a [Source:ZFIN;Acc:ZDB-GENE-110309-2]
ENSDARG00000045230	0	85	42	67	0	73	49	71	67.5	72	72	84	85	76	93	0	87	No.Diff.Exp	non-transmembrane	cox6b1	cytochrome c oxidase subunit VIb polypeptide 1 [Source:ZFIN;Acc:ZDB-GENE-040718-448]
ENSDARG00000045248	0	0	100	100	100	0	100	0	100	100	100	100	0	0	100	0	100	No.Diff.Exp	non-transmembrane	h3f3b.1	H3 histone, family 3B.1 [Source:ZFIN;Acc:ZDB-GENE-050417-65]
ENSDARG00000045296	0	0	79	93	96	0	0	79	79	77	77	81	81	77	81	79	98	No.Diff.Exp	non-transmembrane	myeov2	myeloma overexpressed 2 [Source:ZFIN;Acc:ZDB-GENE-040426-1883]
ENSDARG00000045305	46	56	65	66	67	61	58	73	73	66	73	78	77	74	76	50	88	No.Diff.Exp	non-transmembrane	pde7a	phosphodiesterase 7A [Source:ZFIN;Acc:ZDB-GENE-031222-10]
ENSDARG00000045352	0	0	35	45.5	46.5	33.5	25	38.3077	38.1111	48.5	49	49.6667	48	53	50	47	74	No.Diff.Exp	non-transmembrane	cst14a.2	cystatin 14a, tandem duplicate 2 [Source:ZFIN;Acc:ZDB-GENE-040426-1065]
ENSDARG00000045355	94	0	0	0	0	0	0	0	0	0	0	0	0	0	96	0	0	No.Diff.Exp	non-transmembrane	tceb1a	transcription elongation factor B (SIII), polypeptide 1a [Source:ZFIN;Acc:ZDB-GENE-040912-120]
ENSDARG00000045359	96	98	99	98	99	99	68	99	97.3333	63	99	97	98	97	0	0	99	No.Diff.Exp	non-transmembrane	tceb1b	transcription elongation factor B (SIII), polypeptide 1b [Source:ZFIN;Acc:ZDB-GENE-040718-138]
ENSDARG00000045372	48	48	54	52	0	56	55	54	53	56	56	65	67	59	69	66	69	No.Diff.Exp	non-transmembrane	ngdn	neuroguidin, EIF4E binding protein [Source:ZFIN;Acc:ZDB-GENE-031030-13]
ENSDARG00000045373	55	58	58	56	0	0	0	56.5	59	60	57.5	95	96	95	95	68	98	No.Diff.Exp	non-transmembrane	pabpn1	poly(A) binding protein, nuclear 1 [Source:ZFIN;Acc:ZDB-GENE-040426-2401]
ENSDARG00000045391	0	20	18	24	21	22	0	24	15	23	23	33	35	19	0	36	51	No.Diff.Exp	transmembrane	cd226	CD226 molecule [Source:ZFIN;Acc:ZDB-GENE-070112-1322]
ENSDARG00000045399	81	92	91	88	89	87	46	87	87	87	87	91	92	71.5	92	92	96	No.Diff.Exp	non-transmembrane	cct5	chaperonin containing TCP1, subunit 5 (epsilon) [Source:ZFIN;Acc:ZDB-GENE-030131-977]
ENSDARG00000045401	37	34	45	50	51	37	42	50	44	29	51	50	52	41	50	45	78	No.Diff.Exp	non-transmembrane	mllt10	myeloid/lymphoid or mixed-lineage leukemia; translocated to, 10 [Source:ZFIN;Acc:ZDB-GENE-041114-176]
ENSDARG00000045402	28	58	0	48	39	51	34	52	52	51	51	57	60	58	53	54	71	No.Diff.Exp	non-transmembrane	commd3	COMM domain containing 3 [Source:ZFIN;Acc:ZDB-GENE-041219-3]
ENSDARG00000045417	0	67	66	74	73	75	43	74	74	75	75	0	0	0	0	0	82	No.Diff.Exp	non-transmembrane	fam49bb	family with sequence similarity 49, member Bb [Source:ZFIN;Acc:ZDB-GENE-040426-2590]
ENSDARG00000045421	24	65	58	68	67	67	42	66	67	68	68	71	69	59	29.5	60.5	74	No.Diff.Exp	transmembrane	stard3nl	STARD3 N-terminal like [Source:ZFIN;Acc:ZDB-GENE-040718-4]
ENSDARG00000045487	0	97	98	97	98	60	60	97	92.3333	60	97	97	97	98	96	96	95	No.Diff.Exp	non-transmembrane	rps16	ribosomal protein S16 [Source:ZFIN;Acc:ZDB-GENE-050506-107]
ENSDARG00000045490	0	51	47	52	0	49	44	46	44	51	51	65	0	57	66	63	65	No.Diff.Exp	transmembrane	ndufb2	NADH dehydrogenase (ubiquinone) 1 beta subcomplex, 2 [Source:ZFIN;Acc:ZDB-GENE-040426-1762]
ENSDARG00000045506	0	60	67	69	68	47	55	66	66	47	65	66	66	0	64	64	82	No.Diff.Exp	transmembrane	gramd4b	GRAM domain containing 4b [Source:ZFIN;Acc:ZDB-GENE-030131-4780]
ENSDARG00000045513	9	40	40	29	51	40	40	50	51	51	51	51	52	31	51	43	67	No.Diff.Exp	non-transmembrane	taf3	TAF3 RNA polymerase II, TATA box binding protein (TBP)-associated facto [Source:ZFIN;Acc:ZDB-GENE-030131-6406]
ENSDARG00000045514	63	76	83	81	81	78	55	78	0	79	79	88	86	86	86	87	91	No.Diff.Exp	non-transmembrane	atp5c1	ATP synthase, H+ transporting, mitochondrial F1 complex, gamma polypeptide 1 [Source:ZFIN;Acc:ZDB-GENE-030131-8901]
ENSDARG00000045519	0	58	51	59	63	59	28	56	46	57	62	32.5	69	62	67	65	64	No.Diff.Exp	non-transmembrane	sfmbt2	Scm-like with four mbt domains 2 [Source:ZFIN;Acc:ZDB-GENE-041210-196]
ENSDARG00000045542	0	57	0	0	0	0	0	65	66	0	66	84	82	87	79	79	95	No.Diff.Exp	non-transmembrane	LAMTOR4	late endosomal/lysosomal adaptor, MAPK and MTOR activator 4 [Source:HGNC Symbol;Acc:HGNC:33772]
ENSDARG00000045543	0	90	92	0	0	0	82	83	77	83	83	96	98	94	97	95.5	97	No.Diff.Exp	non-transmembrane	atp6v1f	ATPase, H+ transporting, lysosomal, V1 subunit F [Source:ZFIN;Acc:ZDB-GENE-040718-259]
ENSDARG00000045553	0	39	38	17	37	38	0	39	37	38	38	0	0	38	29	35	28	No.Diff.Exp	non-transmembrane	hsd17b2	hydroxysteroid (17-beta) dehydrogenase 2 [Source:ZFIN;Acc:ZDB-GENE-040928-1]
ENSDARG00000045561	0	0	43	44	44	46	36	48	48	47	47	55	53	55	49	50	60	No.Diff.Exp	transmembrane	dram1	DNA-damage regulated autophagy modulator 1 [Source:ZFIN;Acc:ZDB-GENE-041010-147]
ENSDARG00000045586	23.25	50	0	44	44	26	23	26	24.7	23.5	24	0	0	0	0	0	50	No.Diff.Exp	non-transmembrane	FTL (2 of 2)	ferritin, light polypeptide [Source:HGNC Symbol;Acc:HGNC:3999]
ENSDARG00000045598	29	67	62	63.6667	63.5	69	49	63.75	62.75	64.3333	64.6667	72	78	69	75	53	0	No.Diff.Exp	non-transmembrane	si:dkey-180p18.9	si:dkey-180p18.9 [Source:ZFIN;Acc:ZDB-GENE-041210-132]
ENSDARG00000045611	67	70	68	70	70	71	71	70	70	0	70	71.5	75	64	73	73	74	No.Diff.Exp	non-transmembrane	nfybb	nuclear transcription factor Y, beta b [Source:ZFIN;Acc:ZDB-GENE-050306-25]
ENSDARG00000045618	0	74	67	77	63	74	66	74	74	74	74	85	84	66	83	83	57	No.Diff.Exp	non-transmembrane	clta	clathrin, light chain A [Source:ZFIN;Acc:ZDB-GENE-040426-1986]
ENSDARG00000045681	0	48	47	0	41	0	44	46	45	45	45	54	54	49	41	49	57	No.Diff.Exp	non-transmembrane	irf5	interferon regulatory factor 5 [Source:ZFIN;Acc:ZDB-GENE-040426-2587]
ENSDARG00000045695	0	67	58	60	58	58	32	37	37	58	58	69.5	68	63	70	70	71	No.Diff.Exp	non-transmembrane	myca	v-myc avian myelocytomatosis viral oncogene homolog a [Source:ZFIN;Acc:ZDB-GENE-990415-162]
ENSDARG00000045750	23.5	41	0	66	66	56	0	64	64	65	64	74	78	63	73	72	83	No.Diff.Exp	transmembrane	syt10	synaptotagmin X [Source:ZFIN;Acc:ZDB-GENE-041210-297]
ENSDARG00000045768	70	78	76	78	79	69	63	78	78	78	78	80	82	73	67.5	79	69	dre_Myel	non-transmembrane	cry1aa	cryptochrome circadian clock 1aa [Source:ZFIN;Acc:ZDB-GENE-010426-2]
ENSDARG00000045773	0	45	47	44	38	49	0	45	45	51	52	52	49	43	40	45	0	No.Diff.Exp	transmembrane	PYURF	PIGY upstream reading frame [Source:HGNC Symbol;Acc:HGNC:44317]
ENSDARG00000045776	35	67	74	0	73	74	74	68	58	74	63.5	85	0	75	82	78	94	No.Diff.Exp	non-transmembrane	cnbpa	CCHC-type zinc finger, nucleic acid binding protein a [Source:ZFIN;Acc:ZDB-GENE-030131-5045]
ENSDARG00000045824	42	60	53	65	66	65	35	65	65	48.5	48.5	67	60	36	67	64	78	No.Diff.Exp	transmembrane	zgc:101783	zgc:101783 [Source:ZFIN;Acc:ZDB-GENE-040912-48]
ENSDARG00000045847	0	0	0	0	0	0	0	0	0	0	0	53	56	0	56	0	62	No.Diff.Exp	non-transmembrane	si:ch211-214j24.10	si:ch211-214j24.10 [Source:ZFIN;Acc:ZDB-GENE-030131-6301]
ENSDARG00000045877	0	0	0	0	0	0	0	0	0	0	0	0	0	86	0	0	0	No.Diff.Exp	non-transmembrane	ube2nb	ubiquitin-conjugating enzyme E2Nb [Source:ZFIN;Acc:ZDB-GENE-040426-1291]
ENSDARG00000045886	0	73	69	72	70	69	55	69	69	70	70	59.8571	75	44	64	76	80	No.Diff.Exp	transmembrane	slc38a2	solute carrier family 38, member 2 [Source:ZFIN;Acc:ZDB-GENE-030131-9659]
ENSDARG00000045913	43	55	49	53	51	58	56	55	54	54	55	57	59	51	62	58	54	No.Diff.Exp	non-transmembrane	mrps10	mitochondrial ribosomal protein S10 [Source:ZFIN;Acc:ZDB-GENE-040914-39]
ENSDARG00000045914	0	0	0	0	0	0	0	0	0	0	0	0	0	0	0	0	0	No.Diff.Exp	non-transmembrane	si:ch211-51e12.7	si:ch211-51e12.7 [Source:ZFIN;Acc:ZDB-GENE-030131-8279]
ENSDARG00000045928	92	94	70	0	96	84	84	96	96	96	96	99	99	95	98	98	51	No.Diff.Exp	non-transmembrane	psma4	proteasome (prosome, macropain) subunit, alpha type, 4 [Source:ZFIN;Acc:ZDB-GENE-040426-1932]
ENSDARG00000045940	61	87	53	85	67	85	72	85	85	85	85	93	94	76	94	94	94	No.Diff.Exp	non-transmembrane	lsm12b	LSM12 homolog b [Source:ZFIN;Acc:ZDB-GENE-040426-2164]
ENSDARG00000045978	0	42	42	37	22	27	0	34	35	35	35	42	44	39	45	41	56	No.Diff.Exp	non-transmembrane	chchd6b	coiled-coil-helix-coiled-coil-helix domain containing 6b [Source:ZFIN;Acc:ZDB-GENE-041114-95]
ENSDARG00000045980	0	0	38	47	50	34.5	27	41.1538	40.6667	46	46	0	0	0	0	0	58	No.Diff.Exp	non-transmembrane	cst14b.1	cystatin 14b, tandem duplicate 1 [Source:ZFIN;Acc:ZDB-GENE-061013-189]
ENSDARG00000046002	0	62	43	35	59	0	54	60	58	56	57	68	68	66	68	70	68	No.Diff.Exp	non-transmembrane	necap2	NECAP endocytosis associated 2 [Source:ZFIN;Acc:ZDB-GENE-050522-67]
ENSDARG00000046012	0	29.5	14	23	30	34	33	37	37	38	38	58	56	31	40.4	44	67	No.Diff.Exp	transmembrane	slc47a1	solute carrier family 47 (multidrug and toxin extrusion), member 1 [Source:ZFIN;Acc:ZDB-GENE-050327-20]
ENSDARG00000046022	61	77	81	81	79	0	0	81	80	81	75.5	82	83	85	85	83	84	No.Diff.Exp	transmembrane	tmed7	transmembrane emp24 protein transport domain containing 7 [Source:ZFIN;Acc:ZDB-GENE-040426-2570]
ENSDARG00000046048	27	73	65	64	46	65	51	71	55.5	72	72	68	70	72	70	67	59	No.Diff.Exp	transmembrane	vapal	VAMP (vesicle-associated membrane protein)-associated protein A, like [Source:ZFIN;Acc:ZDB-GENE-040718-281]
ENSDARG00000046054	23.75	57	0	0	0	39	40	45	44	37	45	0	0	63	59	41	70	No.Diff.Exp	transmembrane	SLC27A3	solute carrier family 27 (fatty acid transporter), member 3 [Source:HGNC Symbol;Acc:HGNC:10997]
ENSDARG00000046106	0	98	0	75	77	96	0	96	96	96	96	98	98	87	97	98	98	No.Diff.Exp	non-transmembrane	rab10	RAB10, member RAS oncogene family [Source:ZFIN;Acc:ZDB-GENE-040718-304]
ENSDARG00000046107	19	36	53	37	60	54	37	58	58	52	58	66	69	45	65	65	55	No.Diff.Exp	non-transmembrane	CASKIN1 (1 of 2)	CASK interacting protein 1 [Source:HGNC Symbol;Acc:HGNC:20879]
ENSDARG00000046127	0	55	59	49	43	60	58	57	57	56	56	62	67	56	59	57	72	No.Diff.Exp	non-transmembrane	tk2	thymidine kinase 2, mitochondrial [Source:ZFIN;Acc:ZDB-GENE-040718-243]
ENSDARG00000046132	0	80	0	66	69	58	54.5	61	62	61	61	77.5	80	69	71.5	81	95	No.Diff.Exp	non-transmembrane	dynlt3	dynein, light chain, Tctex-type 3 [Source:ZFIN;Acc:ZDB-GENE-040927-24]
ENSDARG00000046143	0	0	0	0	0	0	0	0	0	0	0	73	68	71	72	71	80	No.Diff.Exp	non-transmembrane	prkab1b	protein kinase, AMP-activated, beta 1 non-catalytic subunit, b [Source:ZFIN;Acc:ZDB-GENE-030131-7172]
ENSDARG00000046157	89	96	97	97	59	98	77.5	98	88.2	83.3333	98	55	97	0	96	96	97	No.Diff.Exp	non-transmembrane	RPS17	ribosomal protein S17 [Source:HGNC Symbol;Acc:HGNC:10397]
ENSDARG00000051748	0	82	73	0	83	78	67	77	77	79	79	0	0	70.5	0	0	0	No.Diff.Exp	non-transmembrane	ccnd2a	cyclin D2, a [Source:ZFIN;Acc:ZDB-GENE-070424-30]
ENSDARG00000051761	0	34	31	19	0	20	20	30	30	29	29	53	46	26	46	47	59	No.Diff.Exp	non-transmembrane	trim44	tripartite motif containing 44 [Source:ZFIN;Acc:ZDB-GENE-050522-37]
ENSDARG00000051763	0	33	46	41	59	41	39	61	61	61	62	76	75	72	75	74	50	No.Diff.Exp	non-transmembrane	sntb2	syntrophin, beta 2 [Source:ZFIN;Acc:ZDB-GENE-131121-511]
ENSDARG00000051783	61.5	88	87	88	85	88	90	89	79	87	89	91	91	27	89	90	37	No.Diff.Exp	non-transmembrane	rplp0	ribosomal protein, large, P0 [Source:ZFIN;Acc:ZDB-GENE-000629-1]
ENSDARG00000051798	0	61	59	59	56	58	59	59	53	59	59	63	63	45	59	56	78	No.Diff.Exp	non-transmembrane	brd1b	bromodomain containing 1b [Source:ZFIN;Acc:ZDB-GENE-070209-98]
ENSDARG00000051800	35	53	17	53	50	46	45	56	55	55	55	58	53	49	57	55	68	No.Diff.Exp	non-transmembrane	fnbp4	formin binding protein 4 [Source:ZFIN;Acc:ZDB-GENE-130530-633]
ENSDARG00000051836	0	41	38	39	42	0	0	0	0	15.3333	20.0714	55	41	38	41	40	60	No.Diff.Exp	non-transmembrane	im:6904482	im:6904482 [Source:ZFIN;Acc:ZDB-GENE-050506-81]
ENSDARG00000051857	38	47	50	51	50	49	0	45.3333	43	50	50	64	65	45	63	63	62	No.Diff.Exp	non-transmembrane	tes	testis derived transcript (3 LIM domains) [Source:ZFIN;Acc:ZDB-GENE-040718-59]
ENSDARG00000051886	10	54	48	52	53	39	0	49	47	39	50	66	66	39	66	5	79	dre_Myel	non-transmembrane	ankrd11	ankyrin repeat domain 11 [Source:ZFIN;Acc:ZDB-GENE-030131-3932]
ENSDARG00000051888	62	60	67.5	77	78	78	78	76	77	0	78	82	84	82	78	80	90	No.Diff.Exp	non-transmembrane	ist1	increased sodium tolerance 1 homolog (yeast) [Source:ZFIN;Acc:ZDB-GENE-030131-179]
ENSDARG00000051890	0	0	0	0	0	31	26	30	30	30.5	31	53	53	0	55	55	67	No.Diff.Exp	transmembrane	hp	haptoglobin [Source:ZFIN;Acc:ZDB-GENE-030131-1259]
ENSDARG00000051975	0	24	28	27	25	27	0	25	24.6667	26	28	39	42	0	43	43	0	dre_Tcell	transmembrane	cd99	CD99 molecule [Source:ZFIN;Acc:ZDB-GENE-061103-391]
ENSDARG00000051993	0	26	0	0	0	0	0	0	0	0	0	0	0	0	0	0	0	dre_Myel	transmembrane	si:dkey-9i23.4	si:dkey-9i23.4 [Source:ZFIN;Acc:ZDB-GENE-090313-363]
ENSDARG00000052010	70	81	65	75	81	82	82	81	81	81	82	87	85	84	87	90	89	No.Diff.Exp	non-transmembrane	fam96b	family with sequence similarity 96, member B [Source:ZFIN;Acc:ZDB-GENE-040718-148]
ENSDARG00000052059	0	50	32	0	0	33	0	33	33	33	33	62	55	52	0	44	65	No.Diff.Exp	transmembrane	PAQR9	progestin and adipoQ receptor family member IX [Source:HGNC Symbol;Acc:HGNC:30131]
ENSDARG00000052073	82	94	87	94	94	94	93	94	94	94	94	92	0	87	89.5	94	99	No.Diff.Exp	transmembrane	blcap	bladder cancer associated protein [Source:ZFIN;Acc:ZDB-GENE-000330-7]
ENSDARG00000052082	0	0	0	0	0	52	57	76	76	76	76	0	0	78	79	0	76	No.Diff.Exp	non-transmembrane	gabarapb	GABA(A) receptor-associated protein b [Source:ZFIN;Acc:ZDB-GENE-101102-9]
ENSDARG00000052091	0	91	89	90	89	89	64	89	85.5	89	89	91	88	42	91	90	93	No.Diff.Exp	non-transmembrane	rbpjb	recombination signal binding protein for immunoglobulin kappa J region b [Source:ZFIN;Acc:ZDB-GENE-070319-1]
ENSDARG00000052113	51	0	0	57	55	54	53	54	54	55	37	62	72	67	0	0	73	No.Diff.Exp	transmembrane	hexa	hexosaminidase A (alpha polypeptide) [Source:ZFIN;Acc:ZDB-GENE-050417-283]
ENSDARG00000052157	6	24	16	0	24	19	18	23	23	24	24	27	27	14.5	28	28	34	No.Diff.Exp	transmembrane	il12rb2	interleukin 12 receptor, beta 2a [Source:ZFIN;Acc:ZDB-GENE-080107-3]
ENSDARG00000052176	0	37.5	45	47	0	44	33	44	44	44	46	0	0	0	0	0	63	No.Diff.Exp	non-transmembrane	C3H19orf66	chromosome 19 open reading frame 66 [Source:HGNC Symbol;Acc:HGNC:25649]
ENSDARG00000052178	80	93	77	95	96	85	78	95	95	94	94	0	0	0	0	0	97	No.Diff.Exp	non-transmembrane	eif2s1b	eukaryotic translation initiation factor 2, subunit 1 alpha b [Source:ZFIN;Acc:ZDB-GENE-030131-283]
ENSDARG00000052244	30	58	49	55	58	51	38	55	56	56	56	67	70	64	65	54	76	No.Diff.Exp	non-transmembrane	zgc:158564	zgc:158564 [Source:ZFIN;Acc:ZDB-GENE-070112-1662]
ENSDARG00000052277	28	69	32	60	64	58	39	60	54	60	61	56	69	59	68	66	79	No.Diff.Exp	non-transmembrane	cabp2b	calcium binding protein 2b [Source:ZFIN;Acc:ZDB-GENE-081028-55]
ENSDARG00000052290	55	69	65	69	68	45	46	69	69	69	69	80	80	74	79	79	85	No.Diff.Exp	non-transmembrane	rab33ba	RAB33B, member RAS oncogene family a [Source:ZFIN;Acc:ZDB-GENE-050809-122]
ENSDARG00000052304	27	57	54	49	59	56	50	57	56	54	58	72	78	74	76	76	78	dre_Tcell	non-transmembrane	uqcrc1	ubiquinol-cytochrome c reductase core protein I [Source:ZFIN;Acc:ZDB-GENE-040426-1792]
ENSDARG00000052334	0	45	31	0	36	0	34	0	0	0	0	38	42	31	0	38	47	No.Diff.Exp	transmembrane	ociad1	OCIA domain containing 1 [Source:ZFIN;Acc:ZDB-GENE-040426-1100]
ENSDARG00000052336	0	41	36	27	26	35	19	35	30	33	35	48	50	0	0	44	53	No.Diff.Exp	transmembrane	ociad2	OCIA domain containing 2 [Source:ZFIN;Acc:ZDB-GENE-041014-253]
ENSDARG00000052371	0	52	49	52	42	51	44	52	51.5	46.5	46	56	61	55	57	57	59	No.Diff.Exp	transmembrane	higd2a	HIG1 hypoxia inducible domain family, member 2A [Source:ZFIN;Acc:ZDB-GENE-050417-119]
ENSDARG00000052375	0	0	0	0	0	0	0	0	0	0	0	33	32	0	0	0	0	No.Diff.Exp	transmembrane	zgc:66455	zgc:66455 [Source:ZFIN;Acc:ZDB-GENE-040426-1642]
ENSDARG00000052388	67	84	79	80	83	67	70	82	77	82	82	0	0	0	0	0	0	No.Diff.Exp	non-transmembrane	pcgf5b	polycomb group ring finger 5b [Source:ZFIN;Acc:ZDB-GENE-060512-34]
ENSDARG00000052419	0	50	46	46	45	45	25	46	28.5	48	48	57	62	57	58	16.5	72	No.Diff.Exp	non-transmembrane	ankrd12	ankyrin repeat domain 12 [Source:ZFIN;Acc:ZDB-GENE-040426-846]
ENSDARG00000052423	0	48	43	47	0	39	43	47	47	39	48	65	64	49	23	61	73	No.Diff.Exp	non-transmembrane	ppp1r12c	protein phosphatase 1, regulatory subunit 12C [Source:ZFIN;Acc:ZDB-GENE-010724-11]
ENSDARG00000052438	58	98	97	95	93	94	60	97	97	97	97	0	0	75	0	0	0	No.Diff.Exp	non-transmembrane	actr2a	ARP2 actin-related protein 2a homolog (yeast) [Source:ZFIN;Acc:ZDB-GENE-040426-2894]
ENSDARG00000052480	39	0	43	43	43	41	29	42	43	43	43	51	51	46	51	51	56	No.Diff.Exp	non-transmembrane	pdcd11	programmed cell death 11 [Source:ZFIN;Acc:ZDB-GENE-030131-4076]
ENSDARG00000052496	0	50	50	50	48	41	49	52	52	40	51	0	0	0	0	0	70	No.Diff.Exp	non-transmembrane	HMHA1 (1 of 2)	histocompatibility (minor) HA-1 [Source:HGNC Symbol;Acc:HGNC:17102]
ENSDARG00000052536	49	83	78	0	81	81	61	81	81	82	82	87	87	74	85	84	0	No.Diff.Exp	non-transmembrane	tia1	TIA1 cytotoxic granule-associated RNA binding protein [Source:ZFIN;Acc:ZDB-GENE-030131-1506]
ENSDARG00000052567	0	82	78	79	81	76	0	81	81	82	82	86	86	85	86	85	94	No.Diff.Exp	transmembrane	tmem35	transmembrane protein 35 [Source:ZFIN;Acc:ZDB-GENE-030815-1]
ENSDARG00000052615	0	0	40	0	44	43	45	43	43	43	43	49	54	52	48	49	72	No.Diff.Exp	transmembrane	tnmd	tenomodulin [Source:ZFIN;Acc:ZDB-GENE-080220-31]
ENSDARG00000052641	87	96	86	93	92	92	83	96	96	96	96	97	97	93	93	93	98	No.Diff.Exp	non-transmembrane	kpna3	karyopherin alpha 3 (importin alpha 4) [Source:ZFIN;Acc:ZDB-GENE-030616-541]
ENSDARG00000052649	94.5	97	99	99	99	56	71	99	97	99	99	99	100	100	98	96	86	No.Diff.Exp	non-transmembrane	ube2ia	ubiquitin-conjugating enzyme E2Ia [Source:ZFIN;Acc:ZDB-GENE-010607-1]
ENSDARG00000052673	44	85	93	92	93	93	0	93	93	93	85	92	92	90	90	67.5	67	No.Diff.Exp	non-transmembrane	sept7b	septin 7b [Source:ZFIN;Acc:ZDB-GENE-030131-37]
ENSDARG00000052674	53	71	92	98	98	78	97	88	98	98	98	61	98	88	98	36	32	No.Diff.Exp	non-transmembrane	csnk1a1	casein kinase 1, alpha 1 [Source:ZFIN;Acc:ZDB-GENE-020419-19]
ENSDARG00000052697	22.3333	71	71	67	73	72	0	72	66	73	73	70	70	49	62	49	78	No.Diff.Exp	transmembrane	fam172a	family with sequence similarity 172, member A [Source:ZFIN;Acc:ZDB-GENE-040426-1396]
ENSDARG00000052728	0	52	48	51	48	52	47	50	51	52	52	49	56	42	47	47	47	No.Diff.Exp	non-transmembrane	sltm	SAFB-like, transcription modulator [Source:ZFIN;Acc:ZDB-GENE-040426-2647]
ENSDARG00000052746	42	0	0	41	0	54	53	52	53	53	54	52	53	0	48	51	55	No.Diff.Exp	transmembrane	grinab	glutamate receptor, ionotropic, N-methyl D-aspartate-associated protein 1b (glutamate binding) [Source:ZFIN;Acc:ZDB-GENE-040426-1367]
ENSDARG00000052747	0	44	37	39	40	38	41	42	41	41	41	46	47	45	43	26	0	No.Diff.Exp	non-transmembrane	gpatch3	G patch domain containing 3 [Source:ZFIN;Acc:ZDB-GENE-070112-902]
ENSDARG00000052789	37.75	25.5	46	49	52	52	0	51	52	52	52	59	58	56	56	56	66	No.Diff.Exp	non-transmembrane	azin1a	antizyme inhibitor 1a [Source:ZFIN;Acc:ZDB-GENE-050417-20]
ENSDARG00000052826	0	33	62	46	61	63	59	62	58	65	65	70	66	64	63	71	72	No.Diff.Exp	non-transmembrane	runx3	runt-related transcription factor 3 [Source:ZFIN;Acc:ZDB-GENE-000605-2]
ENSDARG00000052833	27	58	58	64	55	57	0	61	65	56	65	70	71	31	48	57	85	No.Diff.Exp	non-transmembrane	zfand3	zinc finger, AN1-type domain 3 [Source:ZFIN;Acc:ZDB-GENE-050706-134]
ENSDARG00000052840	58	68	67	67	68	67	67	71	67	70	70	76	80	79	75	76	77	No.Diff.Exp	non-transmembrane	ndufs4	NADH dehydrogenase (ubiquinone) Fe-S protein 4, (NADH-coenzyme Q reductase) [Source:ZFIN;Acc:ZDB-GENE-050522-421]
ENSDARG00000052842	65	75	39	73	72	45	68	71	71	70	70	86	82	84	85	85	87	No.Diff.Exp	non-transmembrane	ppifb	peptidylprolyl isomerase Fb [Source:ZFIN;Acc:ZDB-GENE-051030-126]
ENSDARG00000052856	42	47	52	50	54	53	35	52	52	53	53	62	62	52	61	60	69	No.Diff.Exp	non-transmembrane	khdrbs1a	KH domain containing, RNA binding, signal transduction associated 1a [Source:ZFIN;Acc:ZDB-GENE-000210-25]
ENSDARG00000052897	32.5	63	58	58	61	57	46	61	60	62	62	61	70	61	67	7	77	No.Diff.Exp	non-transmembrane	atxn2	ataxin 2 [Source:ZFIN;Acc:ZDB-GENE-060526-217]
ENSDARG00000052907	0	66	61	48	65	62	62	63	64	65	66	66	66	63	66	68	75	No.Diff.Exp	non-transmembrane	bcl7a	B-cell CLL/lymphoma 7A [Source:ZFIN;Acc:ZDB-GENE-000607-16]
ENSDARG00000052928	93	99	0	0	0	0	0	0	0	0	0	99	100	99	99	96	100	No.Diff.Exp	non-transmembrane	arf6b	ADP-ribosylation factor 6b [Source:ZFIN;Acc:ZDB-GENE-030131-9056]
ENSDARG00000052954	0	73	65	0	59	61	72	70	70	70	70	87	86	60	75	69	91	No.Diff.Exp	non-transmembrane	rab25b	RAB25, member RAS oncogene family b [Source:ZFIN;Acc:ZDB-GENE-050706-113]
ENSDARG00000052975	23.5	69	65	39	66	67	66	66	66	67	67	72	73	72	73	71	76	No.Diff.Exp	non-transmembrane	ubqln4	ubiquilin 4 [Source:ZFIN;Acc:ZDB-GENE-030131-6269]
ENSDARG00000052978	0	0	0	0	0	0	0	0	0	0	0	82	78	61	74	55	74	No.Diff.Exp	non-transmembrane	mbnl1	muscleblind-like splicing regulator 1 [Source:ZFIN;Acc:ZDB-GENE-060929-704]
ENSDARG00000052994	0	63	62	53	64	61	64	64	64	57	64	72	72.5	50	62.5	75	83	No.Diff.Exp	non-transmembrane	slc25a28	solute carrier family 25 (mitochondrial iron transporter), member 28 [Source:ZFIN;Acc:ZDB-GENE-040426-2125]
ENSDARG00000052997	0	40	0	0	39	0	0	0	0	0	0	45	48	52	44.5	45	0	No.Diff.Exp	transmembrane	sema4e	semaphorin 4e [Source:ZFIN;Acc:ZDB-GENE-990715-7]
ENSDARG00000053047	64	80	79	78	77	72	64	79	79	78	79	82	82	54	81	81	86	No.Diff.Exp	non-transmembrane	eif2s2	eukaryotic translation initiation factor 2, subunit 2 beta [Source:ZFIN;Acc:ZDB-GENE-030131-3085]
ENSDARG00000053058	84	89	64	89	87	74	87	91	63.3333	91	91	95	92	92	94	94	89	No.Diff.Exp	non-transmembrane	rps11	ribosomal protein S11 [Source:ZFIN;Acc:ZDB-GENE-040426-2701]
ENSDARG00000053070	73	72	75	75	45	70	37	77	78	52.5	69.5	83	86	81	84	85	87	No.Diff.Exp	transmembrane	gosr2	golgi SNAP receptor complex member 2 [Source:ZFIN;Acc:ZDB-GENE-030131-3290]
ENSDARG00000053097	20	56	56	53	53	48	30	55	55	53	56	0	60	53	0	0	65	No.Diff.Exp	non-transmembrane	hsf2	heat shock transcription factor 2 [Source:ZFIN;Acc:ZDB-GENE-011128-1]
ENSDARG00000053113	0	40	29.5	22.5	37	32	27	36	36	36	36	48	49	45	45	8	58	No.Diff.Exp	transmembrane	ly75	lymphocyte antigen 75 [Source:ZFIN;Acc:ZDB-GENE-050309-166]
ENSDARG00000053129	0	70	69	63	72	66	69	66	66	66	66	77	70	64	74	68	0	dre_Tcell	non-transmembrane	carhsp1	calcium regulated heat stable protein 1 [Source:ZFIN;Acc:ZDB-GENE-040426-1479]
ENSDARG00000053136	0	0	32	33.5	37	47	34	41	45	43	43	49	0	0	0	48	62	No.Diff.Exp	transmembrane	b2m	beta-2-microglobulin [Source:ZFIN;Acc:ZDB-GENE-980526-88]
ENSDARG00000053217	54	65	67	0	66	60	52	63	60	51	55	61	64	60	71	70	69	No.Diff.Exp	transmembrane	cox7a2a	cytochrome c oxidase subunit VIIa polypeptide 2a (liver) [Source:ZFIN;Acc:ZDB-GENE-050522-153]
ENSDARG00000053291	0	46	41	43	45	48	0	45	45	47	47	62	61	55	30	0	68	No.Diff.Exp	non-transmembrane	pnrc2	proline-rich nuclear receptor coactivator 2 [Source:ZFIN;Acc:ZDB-GENE-030131-5475]
ENSDARG00000053311	0	9	0	13	0	17	5	22	0	24	24	29	19	18	17	17	39	No.Diff.Exp	non-transmembrane	tespa1	thymocyte expressed, positive selection associated 1 [Source:ZFIN;Acc:ZDB-GENE-120727-10]
ENSDARG00000053365	87	96	95	93	94	93	80	93	83.0526	83	89	93	94	95	93	86	97	No.Diff.Exp	non-transmembrane	rpl31	ribosomal protein L31 [Source:ZFIN;Acc:ZDB-GENE-060331-121]
ENSDARG00000053370	29	54	59	55	63	41	41	60	61	0	61	66	63	54	50	64	69	No.Diff.Exp	non-transmembrane	eif3jb	eukaryotic translation initiation factor 3, subunit Jb [Source:ZFIN;Acc:ZDB-GENE-040426-2900]
ENSDARG00000053395	32	59	51	44	0	48	0	50	48	50	50	66	63	61	41	64	60	No.Diff.Exp	non-transmembrane	cdkn2aipnl	CDKN2A interacting protein N-terminal like [Source:ZFIN;Acc:ZDB-GENE-041010-154]
ENSDARG00000053404	50	0	0	0	0	0	0	0	0	0	0	0	0	91.6667	95	93.5	98	No.Diff.Exp	non-transmembrane	zgc:56064	zgc:56064 [Source:ZFIN;Acc:ZDB-GENE-040426-877]
ENSDARG00000053424	0	70	83	85	84	86	71	85	72	77	86	91	92	0	94	93	82	No.Diff.Exp	non-transmembrane	myl2b	myosin, light chain 2b, regulatory, cardiac, slow [Source:ZFIN;Acc:ZDB-GENE-060331-137]
ENSDARG00000053446	0	46	78	79	73	67	83	80	80	77	83	0	0	0	0	0	89	No.Diff.Exp	non-transmembrane	sub1a	SUB1 homolog a (S. cerevisiae) [Source:ZFIN;Acc:ZDB-GENE-050522-151]
ENSDARG00000053457	97	98.5	76	99	99	79	99	99	99	99	99	99	99	81.5	100	100	98	No.Diff.Exp	non-transmembrane	rpl23	ribosomal protein L23 [Source:ZFIN;Acc:ZDB-GENE-030131-8756]
ENSDARG00000053468	0	0	0	0	0	0	0	0	0	0	0	0	0	0	0	0	63	No.Diff.Exp	transmembrane	adam10a	ADAM metallopeptidase domain 10a [Source:ZFIN;Acc:ZDB-GENE-040917-2]
ENSDARG00000053484	2	0	0	0	0	0	0	0	0	0	0	0	0	0	0	0	0	No.Diff.Exp	transmembrane	syne2b	spectrin repeat containing, nuclear envelope 2b [Source:ZFIN;Acc:ZDB-GENE-071218-5]
ENSDARG00000053485	75	78	80	83	82	52	62	83	82	76	82	86.5	89	88	90	87.5	93	No.Diff.Exp	transmembrane	aldh6a1	aldehyde dehydrogenase 6 family, member A1 [Source:ZFIN;Acc:ZDB-GENE-030131-9192]
ENSDARG00000053520	0	30	28	21	21	25	28	25	25	27	26	27	25	26	0	0	0	No.Diff.Exp	non-transmembrane	C12H7orf62	chromosome 7 open reading frame 62 [Source:HGNC Symbol;Acc:HGNC:22402]
ENSDARG00000053535	0	27	31	32	32	31	23	32	32	29	19	31	30	0	24	20	39	No.Diff.Exp	non-transmembrane	lmo7b	LIM domain 7b [Source:ZFIN;Acc:ZDB-GENE-060825-242]
ENSDARG00000053542	62	0	0	0	0	0	0	0	0	0	0	65	67	0	62	65	76	No.Diff.Exp	non-transmembrane	kctd12.2	potassium channel tetramerisation domain containing 12.2 [Source:ZFIN;Acc:ZDB-GENE-060117-4]
ENSDARG00000053547	0	79	65	77	77	74	59	77	76	77	77	85	85	82	84	84	67	No.Diff.Exp	transmembrane	jakmip2	janus kinase and microtubule interacting protein 2 [Source:ZFIN;Acc:ZDB-GENE-091204-293]
ENSDARG00000053568	0	27	17	43	45	44	41	44	43	35	43	50	50	36	47	45	18	No.Diff.Exp	non-transmembrane	pstpip1b	proline-serine-threonine phosphatase interacting protein 1b [Source:ZFIN;Acc:ZDB-GENE-051127-25]
ENSDARG00000053624	0	39	36	36	37	38	30	38	37	33	37	37	41	28	39	38	34	No.Diff.Exp	transmembrane	csf1rb	colony stimulating factor 1 receptor, b [Source:ZFIN;Acc:ZDB-GENE-091118-1]
ENSDARG00000053656	54	74	74	80	79	41	75	75	76	72	75	77	79	83	59	69	92	No.Diff.Exp	non-transmembrane	lypla2	lysophospholipase II [Source:ZFIN;Acc:ZDB-GENE-040426-1715]
ENSDARG00000053666	37	58	51	53	51	56	46	53	53	55	56	54	49	56	57	56	70	No.Diff.Exp	non-transmembrane	myb	v-myb avian myeloblastosis viral oncogene homolog [Source:ZFIN;Acc:ZDB-GENE-991110-14]
ENSDARG00000053668	66	82	81	84	85	85	51	84	84	59	84	87	88	87	87	85	94	No.Diff.Exp	non-transmembrane	stag2b	stromal antigen 2b [Source:ZFIN;Acc:ZDB-GENE-030131-2785]
ENSDARG00000053702	0	22	20	17	21	23	18	22	23	21	23	24	25.5	15.5	21	22	32	No.Diff.Exp	transmembrane	il2rgb	interleukin 2 receptor, gamma b [Source:ZFIN;Acc:ZDB-GENE-080402-2]
ENSDARG00000053711	31	52	50	52	51	0	52	52	52	52	51	66	62	0	62	59	76	No.Diff.Exp	transmembrane	GPR68	G protein-coupled receptor 68 [Source:HGNC Symbol;Acc:HGNC:4519]
ENSDARG00000053716	0	18	19	0	19	20	19	21	20	20	20	45	41	33	37	35	52	No.Diff.Exp	non-transmembrane	NAIF1 (2 of 3)	nuclear apoptosis inducing factor 1 [Source:HGNC Symbol;Acc:HGNC:25446]
ENSDARG00000053753	24	59	50	57	58	56	48	54	55	57	57	56	50	38.5	0	0	47	No.Diff.Exp	transmembrane	mff	mitochondrial fission factor [Source:ZFIN;Acc:ZDB-GENE-040426-1510]
ENSDARG00000053800	0	0	0	0	0	0	0	0	0	0	0	0	33.5	0	0	0	34	No.Diff.Exp	non-transmembrane	si:ch211-276c2.4	si:ch211-276c2.4 [Source:ZFIN;Acc:ZDB-GENE-030131-423]
ENSDARG00000053858	0	0	0	92	88	91	91	88	88	78	90	79	86	0	0	0	94	No.Diff.Exp	non-transmembrane	crip1	cysteine-rich protein 1 [Source:ZFIN;Acc:ZDB-GENE-041111-1]
ENSDARG00000053864	10	35	32	34	34	32	32	33	34	32	32	48	49	21	46	35	55	No.Diff.Exp	non-transmembrane	elmsan1b	ELM2 and Myb/SANT-like domain containing 1b [Source:ZFIN;Acc:ZDB-GENE-131121-13]
ENSDARG00000053876	67	82	81	0	0	77	73	71	71	78	78	86	88	56	85	84	91	No.Diff.Exp	non-transmembrane	klhl26	kelch-like family member 26 [Source:ZFIN;Acc:ZDB-GENE-030131-5975]
ENSDARG00000053878	0	64	35	54	50	40	44	53	53	54	54	71	78	69	76	73	88	No.Diff.Exp	non-transmembrane	inpp5l	inositol polyphosphate-5-phosphatase L [Source:ZFIN;Acc:ZDB-GENE-051127-29]
ENSDARG00000053912	79	65	83	84	0	75.5	82	74.5	74.5	79	74	87	88	81	90	87	0	No.Diff.Exp	non-transmembrane	fbl	fibrillarin [Source:ZFIN;Acc:ZDB-GENE-040426-1936]
ENSDARG00000053956	6	68	68	68	0	64	62	67	67	66	66	84	85	73	85	84	89	No.Diff.Exp	non-transmembrane	sptbn2	spectrin, beta, non-erythrocytic 2 [Source:ZFIN;Acc:ZDB-GENE-030131-787]
ENSDARG00000053979	0	78	94	93	42.5	88	90	89	89	89	89	95	95	91	93	91	98	No.Diff.Exp	non-transmembrane	bc2	putative breast adenocarcinoma marker [Source:ZFIN;Acc:ZDB-GENE-040426-2922]
ENSDARG00000053990	57	63	48	66	65	70	68	68	69.5	70	70	61	61	60	61	48.5	61	No.Diff.Exp	non-transmembrane	hmgb2b	high mobility group box 2b [Source:ZFIN;Acc:ZDB-GENE-040912-122]
ENSDARG00000054055	0	54	47	0	45	41	45	37	40	44	44	32	0	0	0	0	75	No.Diff.Exp	transmembrane	ostn	osteocrin [Source:ZFIN;Acc:ZDB-GENE-121211-2]
ENSDARG00000054058	0	45.5	42	0	0	0	49	44	44	50	50	0	0	0	0	0	51	No.Diff.Exp	non-transmembrane	h1fx	H1 histone family, member X [Source:ZFIN;Acc:ZDB-GENE-030131-1228]
ENSDARG00000054063	53	0	86	84	85	0	0	85	85	85	87	86.5	86	83.5	85	84	87	No.Diff.Exp	non-transmembrane	arpc4	actin related protein 2/3 complex, subunit 4 [Source:ZFIN;Acc:ZDB-GENE-010724-9]
ENSDARG00000054087	0	63	60	60	51	2	51	60	60	60	60	0	0	0	0	0	75	No.Diff.Exp	non-transmembrane	irs1	insulin receptor substrate 1 [Source:ZFIN;Acc:ZDB-GENE-030131-872]
ENSDARG00000054096	0	39	0	32	40	33	39	38	37	38	38	50	47	46	47	46	55	dre_Myel	non-transmembrane	rbm41	RNA binding motif protein 41 [Source:ZFIN;Acc:ZDB-GENE-041114-107]
ENSDARG00000054153	21	0	0	14	23	17	24	23.5	23.5	24	24	33	38	0	0	0	44	No.Diff.Exp	non-transmembrane	ftr50	finTRIM family, member 50 [Source:ZFIN;Acc:ZDB-GENE-080215-17]
ENSDARG00000054154	20.5	57	64	40	64	64	36	64	52	64	64	62	72	66	66	66	73	No.Diff.Exp	non-transmembrane	bms1	BMS1 ribosome biogenesis factor [Source:ZFIN;Acc:ZDB-GENE-060720-2]
ENSDARG00000054155	85	90	90	88	90	66	81	90	91	92	92	98	98	97	97	97	99	No.Diff.Exp	non-transmembrane	pcna	proliferating cell nuclear antigen [Source:ZFIN;Acc:ZDB-GENE-000210-8]
ENSDARG00000054191	23	81	86	88	86	87	56.5	85.6667	82.3333	69.5	84.5	89	89	88	89	62	92	No.Diff.Exp	non-transmembrane	pgk1	phosphoglycerate kinase 1 [Source:ZFIN;Acc:ZDB-GENE-040426-2711]
ENSDARG00000054201	0	57	62	67	0	65	63	65	65	58	66	25	80	72	77	72	87	No.Diff.Exp	transmembrane	rnf40	ring finger protein 40 [Source:ZFIN;Acc:ZDB-GENE-030131-6607]
ENSDARG00000054213	31	88	81	89	90	81	65	89	89	89	89	89	88	76	88	88	94	No.Diff.Exp	non-transmembrane	hectd1	HECT domain containing 1 [Source:ZFIN;Acc:ZDB-GENE-030616-153]
ENSDARG00000054271	21	41	0	32	38	22	36	36	36	39	39	36	35	38	36	35	42	No.Diff.Exp	non-transmembrane	cdkn1bb	cyclin-dependent kinase inhibitor 1Bb [Source:ZFIN;Acc:ZDB-GENE-030521-13]
ENSDARG00000054272	23	38	55	58	59	57	51	58	58	58	58	0	0	0	0	0	0	No.Diff.Exp	non-transmembrane	caprin1b	cell cycle associated protein 1b [Source:ZFIN;Acc:ZDB-GENE-040426-2020]
ENSDARG00000054290	0	16	0	0	0	0	0	0	0	0	0	0	0	0	0	7	0	No.Diff.Exp	non-transmembrane	acin1a	apoptotic chromatin condensation inducer 1a [Source:ZFIN;Acc:ZDB-GENE-030616-583]
ENSDARG00000054320	13.5	59	85	87	83	80	71	84	84	78	85	79	91	89	92	79	78	No.Diff.Exp	transmembrane	ap2a1	adaptor-related protein complex 2, alpha 1 subunit [Source:ZFIN;Acc:ZDB-GENE-090302-2]
ENSDARG00000054355	82	99	98	98	98	66	82	98	98	98	98	100	85	99	99	99	87	No.Diff.Exp	non-transmembrane	dcaf7	ddb1 and cul4 associated factor 7 [Source:ZFIN;Acc:ZDB-GENE-030131-9511]
ENSDARG00000054362	63	76	75	67	77	69	35	78	77	77	77	85	88	81	86	81	94	No.Diff.Exp	transmembrane	ccdc47	coiled-coil domain containing 47 [Source:ZFIN;Acc:ZDB-GENE-040912-15]
ENSDARG00000054363	29	0	0	0	0	0	0	0	0	0	0	36	38	0	0	33	0	No.Diff.Exp	transmembrane	wu:fd14a06	wu:fd14a06 [Source:ZFIN;Acc:ZDB-GENE-030131-5337]
ENSDARG00000054389	0	60	67	63	51	53	51	64	64	63	64	77	75	70	75	74	75	dre_NK	non-transmembrane	rhof	ras homolog family member F [Source:ZFIN;Acc:ZDB-GENE-050522-280]
ENSDARG00000054442	67	75	74	74	46	0	39	75	75	75	75	67.3333	68.5	54	71	64.5	80	No.Diff.Exp	non-transmembrane	cbx1b	chromobox homolog 1b (HP1 beta homolog Drosophila) [Source:ZFIN;Acc:ZDB-GENE-040625-68]
ENSDARG00000054447	22	64	0	67	59	51	47.5	64	63	67	67	0	0	0	0	0	13	dre_Myel	transmembrane	SLC29A1 (1 of 2)	solute carrier family 29 (equilibrative nucleoside transporter), member 1 [Source:HGNC Symbol;Acc:HGNC:11003]
ENSDARG00000054539	18	31	30	30	0	30	28	36	35	36	36	48	46	37	54	52	63	dre_Tcell	transmembrane	LRP10	low density lipoprotein receptor-related protein 10 [Source:HGNC Symbol;Acc:HGNC:14553]
ENSDARG00000054540	0	82	66	82	60	78	73	77	77	76	77	89	90	44	85	88	90	No.Diff.Exp	non-transmembrane	imp4	IMP4, U3 small nucleolar ribonucleoprotein, homolog (yeast) [Source:ZFIN;Acc:ZDB-GENE-040718-474]
ENSDARG00000054548	0	0	0	30.5556	28.1667	29.2857	31.125	30.875	30.1429	30	30.125	0	0	0	0	0	30	dre_Tcell	non-transmembrane	si:ch73-285p12.4	si:ch73-285p12.4 [Source:ZFIN;Acc:ZDB-GENE-110411-145]
ENSDARG00000054574	45	0	76	0	0	74	53	74	74	74	74	64	60	0	61	59.3333	88	No.Diff.Exp	non-transmembrane	znhit1	zinc finger, HIT-type containing 1 [Source:ZFIN;Acc:ZDB-GENE-050417-272]
ENSDARG00000054578	57.5	80	80	76	78	78	80	79	79	78	71	85	91	48	81.5	86	93	No.Diff.Exp	transmembrane	arl6ip1	ADP-ribosylation factor-like 6 interacting protein 1 [Source:ZFIN;Acc:ZDB-GENE-040426-1087]
ENSDARG00000054583	42	50	49	49	49	51	45	50	50	51	50	0	0	0	0	0	55	No.Diff.Exp	transmembrane	mfsd6b	major facilitator superfamily domain containing 6b [Source:ZFIN;Acc:ZDB-GENE-040912-84]
ENSDARG00000054610	0	69	0	65	0	69	69	69	69	69	69	86	88	84	85	84	90	No.Diff.Exp	non-transmembrane	coro1a	coronin, actin binding protein, 1A [Source:ZFIN;Acc:ZDB-GENE-030131-9512]
ENSDARG00000054666	0	0	0	0	0	0	0	0	0	0	0	65	66	58	68	71	0	No.Diff.Exp	non-transmembrane	pgpep1	pyroglutamyl-peptidase I [Source:ZFIN;Acc:ZDB-GENE-050522-88]
ENSDARG00000054696	62	81	0	69	74	52	0	74	68	75	75	90	88	88	89	87	91	No.Diff.Exp	non-transmembrane	psmb4	proteasome (prosome, macropain) subunit, beta type, 4 [Source:ZFIN;Acc:ZDB-GENE-050417-333]
ENSDARG00000054777	0	53	0	46	0	46	45	47	36	46	46	83	88	89	85	85	82	dre_NK	non-transmembrane	C8H5orf51	chromosome 5 open reading frame 51 [Source:HGNC Symbol;Acc:HGNC:27750]
ENSDARG00000054793	47	56	51	54	0	32	0	49	49	51	51	64	72	68	70	65	44	No.Diff.Exp	transmembrane	emc10	ER membrane protein complex subunit 10 [Source:ZFIN;Acc:ZDB-GENE-030131-9045]
ENSDARG00000054804	29	68	66	69	68	70	59	70	68	70	70	63	66	39	59	55.5	81	dre_Tcell	non-transmembrane	anp32e	acidic (leucine-rich) nuclear phosphoprotein 32 family, member E [Source:ZFIN;Acc:ZDB-GENE-040426-2448]
ENSDARG00000054807	31.5	91	89	90	89	76	89	88	74	88	88	93	92	92	93	92	93	dre_NK	non-transmembrane	sec13	SEC13 homolog, nuclear pore and COPII coating complex component [Source:ZFIN;Acc:ZDB-GENE-040426-2649]
ENSDARG00000054818	87	95	93	94	92	0	61	92	83.4	92	92	94	95	94	94	96	93	No.Diff.Exp	non-transmembrane	rpl32	ribosomal protein L32 [Source:ZFIN;Acc:ZDB-GENE-060331-105]
ENSDARG00000054823	3	63	56	0	63	46	42	47	47	45	45	69	72	74	64	59	63	dre_Myel	non-transmembrane	id3	inhibitor of DNA binding 3 [Source:ZFIN;Acc:ZDB-GENE-020515-1]
ENSDARG00000054842	0	58	61	57	0	53	34	55	56	48	57	73	75	72	69	45	43	No.Diff.Exp	non-transmembrane	hsd17b14	hydroxysteroid (17-beta) dehydrogenase 14 [Source:ZFIN;Acc:ZDB-GENE-040801-24]
ENSDARG00000054903	50	42	0	64	65	57	52	62	60	58	55	85	84	81	56	67	60	No.Diff.Exp	non-transmembrane	mta3	metastasis associated 1 family, member 3 [Source:ZFIN;Acc:ZDB-GENE-030131-6485]
ENSDARG00000054907	59	42	62	61	65	38	36	57	46	62	62	71	61	72	68	50	42	No.Diff.Exp	transmembrane	cox7a3	cytochrome c oxidase subunit VIIa polypeptide 3 [Source:ZFIN;Acc:ZDB-GENE-030131-7691]
ENSDARG00000054916	0	55	0	0	0	0	0	48	0	50	50	0	0	0	0	0	63	No.Diff.Exp	non-transmembrane	eif4ebp3	eukaryotic translation initiation factor 4E binding protein 3 [Source:ZFIN;Acc:ZDB-GENE-041114-44]
ENSDARG00000054973	0	56	21	30	56	50	48	54	54	55	55	0	66	38	55	58	71	No.Diff.Exp	non-transmembrane	itsn2b	intersectin 2b [Source:ZFIN;Acc:ZDB-GENE-050309-102]
ENSDARG00000054980	0	28	59	56	58	59	43	58	57	47	58	64	65	59	61	62	71	No.Diff.Exp	non-transmembrane	ebna1bp2	EBNA1 binding protein 2 [Source:ZFIN;Acc:ZDB-GENE-030131-6989]
ENSDARG00000055009	0	59	58	61	62	61	41	63	63	61	63	68	68	61	67	66	70	No.Diff.Exp	transmembrane	col4a1	collagen, type IV, alpha 1 [Source:ZFIN;Acc:ZDB-GENE-081105-114]
ENSDARG00000055022	0	75	74	75	76	68	57	75	75	75	75	77	77	76	78	53	83	No.Diff.Exp	non-transmembrane	pds5a	PDS5 cohesin associated factor A [Source:ZFIN;Acc:ZDB-GENE-040426-1612]
ENSDARG00000055064	59	62	47	51	0	52	43	55	54	53	53	67	67	54	62	35	65	No.Diff.Exp	non-transmembrane	prdx5	peroxiredoxin 5 [Source:ZFIN;Acc:ZDB-GENE-050522-159]
ENSDARG00000055075	8	0	0	0	0	0	0	0	0	0	0	64	64	52	59	60	72	dre_NK	non-transmembrane	svila	supervillin a [Source:ZFIN;Acc:ZDB-GENE-990706-5]
ENSDARG00000055076	22	65	54	54	0	35	39.5	40.5	39.4	40.5	40.6	66	66	57	65	29	25	No.Diff.Exp	non-transmembrane	nxf1	nuclear RNA export factor 1 [Source:ZFIN;Acc:ZDB-GENE-030131-2585]
ENSDARG00000055080	25	22	39	43	35	45	32.5	45	44.5	45	41	46	0	46	46	41	53	dre_Tcell	non-transmembrane	rbm4.2	RNA binding motif protein 4.2 [Source:ZFIN;Acc:ZDB-GENE-030131-3019]
ENSDARG00000055086	0	67	51	62	67	65	51	65	65	65	65	62	64	60	0	0	75	No.Diff.Exp	non-transmembrane	ggnbp2	gametogenetin binding protein 2 [Source:ZFIN;Acc:ZDB-GENE-060929-52]
ENSDARG00000055113	0	28	0	0	23	18.3333	4	23	20	18.6667	15.5	31	34	22	30	22	25	No.Diff.Exp	transmembrane	pom121	POM121 transmembrane nucleoporin [Source:ZFIN;Acc:ZDB-GENE-030131-6557]
ENSDARG00000055115	22	69	62	60	64	50	52	59	51	0	61	0	0	0	0	0	75	No.Diff.Exp	non-transmembrane	dtnbp1a	dystrobrevin binding protein 1a [Source:ZFIN;Acc:ZDB-GENE-040426-1036]
ENSDARG00000055120	63	65	68	65	72	71	70	69	69	72	72	79	82	75	75	79	80	No.Diff.Exp	transmembrane	ctsba	cathepsin Ba [Source:ZFIN;Acc:ZDB-GENE-040426-2650]
ENSDARG00000055124	0	78	73	75	65	75	49	76	76	77	77	0	0	70	78	77	86	No.Diff.Exp	non-transmembrane	ccnl1a	cyclin L1a [Source:ZFIN;Acc:ZDB-GENE-050419-206]
ENSDARG00000055162	14	45	40	39	43	42	22	44	45	45	45	51	52	47	50	45	69	No.Diff.Exp	non-transmembrane	zhx2	zinc fingers and homeoboxes 2 [Source:ZFIN;Acc:ZDB-GENE-031107-2]
ENSDARG00000055186	34	50	31	34	37	43	41	44	44	43	44	54	54	49	52	52	69	dre_Tcell	transmembrane	ccr9a	chemokine (C-C motif) receptor 9a [Source:ZFIN;Acc:ZDB-GENE-060130-125]
ENSDARG00000055225	3	69	48	69	69	62	50	67	67	65	67	79	69	68	77	52	80	No.Diff.Exp	non-transmembrane	dock8	dedicator of cytokinesis 8 [Source:ZFIN;Acc:ZDB-GENE-060503-743]
ENSDARG00000055276	30	44	40	37	41	41	36	43	43	42	43	55	55	55	41	25	59	No.Diff.Exp	non-transmembrane	rel	v-rel avian reticuloendotheliosis viral oncogene homolog [Source:ZFIN;Acc:ZDB-GENE-040718-255]
ENSDARG00000055283	6	81	0	75	77	77	77	77	73	40	78	83	83	59	85	85	84	dre_Myel	non-transmembrane	id2a	inhibitor of DNA binding 2, dominant negative helix-loop-helix protein, a [Source:ZFIN;Acc:ZDB-GENE-020910-1]
ENSDARG00000055291	81	82	82	83	82	74	66	82	82	82	82	79	80	76	81	80	83	No.Diff.Exp	non-transmembrane	rab18a	RAB18A, member RAS oncogene family [Source:ZFIN;Acc:ZDB-GENE-030131-3980]
ENSDARG00000055360	56	59	59	56	55	63	0	60	61	60	60	63	69	62	68	68	75	No.Diff.Exp	non-transmembrane	llph	LLP homolog, long-term synaptic facilitation (Aplysia) [Source:ZFIN;Acc:ZDB-GENE-051030-30]
ENSDARG00000055365	0	0	0	0	0	0	0	0	0	0	0	44	43	40	36	36	0	No.Diff.Exp	non-transmembrane	si:dkey-25e12.3	si:dkey-25e12.3 [Source:ZFIN;Acc:ZDB-GENE-041001-132]
ENSDARG00000055373	21	74	70	68	67	69	47	68	69	67	69	83	85	74	82	80	80	No.Diff.Exp	transmembrane	sema3fb	sema domain, immunoglobulin domain (Ig), short basic domain, secreted, (semaphorin) 3Fb [Source:ZFIN;Acc:ZDB-GENE-050513-2]
ENSDARG00000055389	0	0	0	0	0	0	0	0	0	0	0	0	0	0	0	0	64	No.Diff.Exp	non-transmembrane	si:dkey-67c22.2	si:dkey-67c22.2 [Source:ZFIN;Acc:ZDB-GENE-030131-5845]
ENSDARG00000055429	0	28.5	0	48	50	53	45	50	50	58	58	56	49	40	56	44	78	No.Diff.Exp	non-transmembrane	kat6b	K(lysine) acetyltransferase 6B [Source:ZFIN;Acc:ZDB-GENE-000607-52]
ENSDARG00000055472	36	80	70	75	72	42	54	75	74	70	74	55	82	42	83	47	88	No.Diff.Exp	non-transmembrane	nubp1	nucleotide binding protein 1 (MinD homolog, E. coli) [Source:ZFIN;Acc:ZDB-GENE-050417-471]
ENSDARG00000055475	0	0	96	0	0	0	0	0	0	0	0	96.75	0	100	99	96	0	No.Diff.Exp	non-transmembrane	rps27.2	ribosomal protein S27, isoform 2 [Source:ZFIN;Acc:ZDB-GENE-040426-1735]
ENSDARG00000055493	8	48	47	39	47	0	25	47	39.5	34	47	57	55	20	58	0	62	No.Diff.Exp	non-transmembrane	hic1	hypermethylated in cancer 1 [Source:ZFIN;Acc:ZDB-GENE-040713-2]
ENSDARG00000055502	0	30	34	0	0	20	29	36	36	37	37	43	50	48	49	36	52	No.Diff.Exp	non-transmembrane	cicb	capicua transcriptional repressor b [Source:ZFIN;Acc:ZDB-GENE-030131-1966]
ENSDARG00000055504	23	26	0	23	25	28	27	23	25	27	27	40	40	16	0	0	46	No.Diff.Exp	transmembrane	CD68	CD68 molecule [Source:HGNC Symbol;Acc:HGNC:1693]
ENSDARG00000055536	69	69	39	74	69	78	71	79	79	79	79	0	0	0	0	30	88	No.Diff.Exp	non-transmembrane	otub1a	OTU deubiquitinase, ubiquitin aldehyde binding 1a [Source:ZFIN;Acc:ZDB-GENE-040718-108]
ENSDARG00000055560	31	46	42	46	48	49	50	0	0	50	50	58	54	57	0	52	65	No.Diff.Exp	transmembrane	p2ry8	purinergic receptor P2Y, G-protein coupled, 8 [Source:ZFIN;Acc:ZDB-GENE-070912-447]
ENSDARG00000055592	39	51	53	64	63	64	55	65	64	65	65	78	65	74	76	76	32	No.Diff.Exp	non-transmembrane	capn2b	calpain 2, (m/II) large subunit b [Source:ZFIN;Acc:ZDB-GENE-050522-84]
ENSDARG00000055708	0	72	68	0	0	55	62	60	60	60	60	71	73	69	68	64	78	No.Diff.Exp	non-transmembrane	timm8b	translocase of inner mitochondrial membrane 8 homolog B (yeast) [Source:ZFIN;Acc:ZDB-GENE-031019-1]
ENSDARG00000055713	23	59	53	57	26	52	45	59	59	60	59	71	71	66	70	67	82	No.Diff.Exp	non-transmembrane	fmnl1a	formin-like 1a [Source:ZFIN;Acc:ZDB-GENE-120215-83]
ENSDARG00000055719	37	42	0	53	52	0	0	56	56	56	56	59	59	56	54	47	58	No.Diff.Exp	non-transmembrane	ino80c	INO80 complex subunit C [Source:ZFIN;Acc:ZDB-GENE-040625-97]
ENSDARG00000055759	0	74	45	0	57	59	47	68	69	0	68	0	79	67	67	69	84	dre_NK	non-transmembrane	efhd2	EF-hand domain family, member D2 [Source:ZFIN;Acc:ZDB-GENE-060531-152]
ENSDARG00000055837	0	36	41	0	0	25	32	38	37	35	38	54	56	22	48	48	62	No.Diff.Exp	non-transmembrane	arhgef1b	Rho guanine nucleotide exchange factor (GEF) 1b [Source:ZFIN;Acc:ZDB-GENE-060616-136]
ENSDARG00000055857	0	53	53	51	56	52	31	54	54	55	55	62	64	34.5	62	60	72	No.Diff.Exp	non-transmembrane	dopey2	dopey family member 2 [Source:ZFIN;Acc:ZDB-GENE-040426-1195]
ENSDARG00000055868	33	0	44	0	40	36	0	34	32.6667	37	37	45	50	40	20	48	55	No.Diff.Exp	non-transmembrane	rsl1d1	ribosomal L1 domain containing 1 [Source:ZFIN;Acc:ZDB-GENE-130603-67]
ENSDARG00000055874	0	80	77	69	67	78	63	79	77	80	80	85	87	84	86	86	0	No.Diff.Exp	transmembrane	cpe	carboxypeptidase E [Source:ZFIN;Acc:ZDB-GENE-090313-68]
ENSDARG00000055875	0	36	33	35	35	37	0	35	33	37	37	53	50	40	50	0	64	No.Diff.Exp	transmembrane	pag1	phosphoprotein membrane anchor with glycosphingolipid microdomains 1 [Source:ZFIN;Acc:ZDB-GENE-060503-586]
ENSDARG00000055903	44	75	67	74	74	74	36	74	75	74	74	77	78	64	74	71	78	No.Diff.Exp	non-transmembrane	luc7l	LUC7-like (S. cerevisiae) [Source:ZFIN;Acc:ZDB-GENE-040625-111]
ENSDARG00000055938	59	40	69	70	72	71	54	72	72	72	72	80	80	44	78	77	86	No.Diff.Exp	transmembrane	tspan14	tetraspanin 14 [Source:ZFIN;Acc:ZDB-GENE-060825-329]
ENSDARG00000055955	7	32	28	31	35	36	20	35	36	35	36	0	0	13	10	32	46	No.Diff.Exp	non-transmembrane	lcp2a	lymphocyte cytosolic protein 2a [Source:ZFIN;Acc:ZDB-GENE-041114-97]
ENSDARG00000055966	17	16	28	31	31	33	31	30	32	33	33	32	37	34	37	34	43	No.Diff.Exp	non-transmembrane	cflara	CASP8 and FADD-like apoptosis regulator a [Source:ZFIN;Acc:ZDB-GENE-030826-3]
ENSDARG00000055974	47	48	50	49	52	52	20	50	48	51	51	63	61.5	58	63	63	72	No.Diff.Exp	non-transmembrane	tpmt.1	thiopurine S-methyltransferase, tandem duplicate 1 [Source:ZFIN;Acc:ZDB-GENE-050522-141]
ENSDARG00000055986	0	0	0	0	0	0	0	0	0	0	0	44	47	42	48	0	43	dre_NK	transmembrane	si:ch211-165b19.5	si:ch211-165b19.5 [Source:ZFIN;Acc:ZDB-GENE-070912-133]
ENSDARG00000055996	0	78	93	90	91	93	76	93	89	93	93	90	89	71	90	82	88	No.Diff.Exp	non-transmembrane	rps8a	ribosomal protein S8a [Source:ZFIN;Acc:ZDB-GENE-030131-8626]
ENSDARG00000056008	67.6667	78	0	75	72	69	75	75	75	75	75	0	76	83	81	78	86	No.Diff.Exp	transmembrane	atp5g1	ATP synthase, H+ transporting, mitochondrial Fo complex, subunit C1 (subunit 9) [Source:ZFIN;Acc:ZDB-GENE-040426-1966]
ENSDARG00000056026	43	51	49	41	0	38	24	41	42	42	42	53	54	53	53	44	60	No.Diff.Exp	non-transmembrane	tprg1	tumor protein p63 regulated 1 [Source:ZFIN;Acc:ZDB-GENE-070410-113]
ENSDARG00000056075	0	0	19	0	0	0	0	0	0	0	0	0	0	0	13	0	29	No.Diff.Exp	transmembrane	rca2.1	regulator of complement activation group 2 gene 1 [Source:ZFIN;Acc:ZDB-GENE-050320-60]
ENSDARG00000056085	88	94	93	94	94	93	60	93	93	93	90.5	96	96	95	96	96	94	No.Diff.Exp	non-transmembrane	mob4	MOB family member 4, phocein [Source:ZFIN;Acc:ZDB-GENE-040801-174]
ENSDARG00000056089	61	86	56	41	86	84	61	84	84	84	84	93	94	91	92	82	97	No.Diff.Exp	non-transmembrane	nrbp1	nuclear receptor binding protein 1 [Source:ZFIN;Acc:ZDB-GENE-041001-146]
ENSDARG00000056090	58	44	71.5	36.5	33	31	0	32	32	32	31	75	79	79	63	0	50	dre_Myel	non-transmembrane	capza1b	capping protein (actin filament) muscle Z-line, alpha 1b [Source:ZFIN;Acc:ZDB-GENE-031002-24]
ENSDARG00000056099	83	0	94	85	89	62	89	83	75.5	83	83	94	93	97	85.6667	89	97	No.Diff.Exp	non-transmembrane	gtf2h5	general transcription factor IIH, polypeptide 5 [Source:ZFIN;Acc:ZDB-GENE-041001-144]
ENSDARG00000056119	57	79	76	27	0	76	39	77	77	56	77	76	81	80	79	79	89	No.Diff.Exp	non-transmembrane	eef1g	eukaryotic translation elongation factor 1 gamma [Source:ZFIN;Acc:ZDB-GENE-020423-3]
ENSDARG00000056127	0	98	100	97	0	99	97	99	99	99	99	56	99	95	99	29.5	99	No.Diff.Exp	non-transmembrane	polr2gl	polymerase (RNA) II (DNA directed) polypeptide G-like [Source:ZFIN;Acc:ZDB-GENE-030131-2808]
ENSDARG00000056133	0	46	44	47	46	44	44	47	47	46	46	62	62	58	0	60	78	No.Diff.Exp	transmembrane	kitb	v-kit Hardy-Zuckerman 4 feline sarcoma viral oncogene homolog b [Source:ZFIN;Acc:ZDB-GENE-050916-2]
ENSDARG00000056138	89	90	92	94	94	81	59	94	94	94	94	96	95	95	96	33	97	No.Diff.Exp	non-transmembrane	sf3b1	splicing factor 3b, subunit 1 [Source:ZFIN;Acc:ZDB-GENE-040827-3]
ENSDARG00000056141	59	67	0	64	70	69	66	65	66	67	67	74	73	67	71	59	88	No.Diff.Exp	non-transmembrane	coq10b	coenzyme Q10B [Source:ZFIN;Acc:ZDB-GENE-050417-263]
ENSDARG00000056152	44	42	60	65	55	65	48.5	64	64	66	64	69	70	65	62	52	72	No.Diff.Exp	transmembrane	fam3c	family with sequence similarity 3, member C [Source:ZFIN;Acc:ZDB-GENE-030131-6137]
ENSDARG00000056160	59	86	85	87	88	87	59	88	88	0	87	91	91	89	91	91	94	No.Diff.Exp	non-transmembrane	hspd1	heat shock 60 protein 1 [Source:ZFIN;Acc:ZDB-GENE-021206-1]
ENSDARG00000056167	0	76	76	78	59.5	49	57	81	65.5	82	82	82	80	84	79	78	84	No.Diff.Exp	non-transmembrane	hspe1	heat shock 10 protein 1 [Source:ZFIN;Acc:ZDB-GENE-000906-2]
ENSDARG00000056186	0	72	77	74	75	75	74	74	74	74	74	0	0	0	0	0	0	No.Diff.Exp	non-transmembrane	eif5a2	eukaryotic translation initiation factor 5A2 [Source:ZFIN;Acc:ZDB-GENE-040426-2405]
ENSDARG00000056206	0	76	78	80	72	74	74	76	65	73	76	81	84	76	77	74	89	dre_Tcell	non-transmembrane	camk2g2	calcium/calmodulin-dependent protein kinase (CaM kinase) II gamma 2 [Source:ZFIN;Acc:ZDB-GENE-070323-2]
ENSDARG00000056233	0	48	0	0	0	34	36	0	30	37	37	58	60	42	58	58	57	No.Diff.Exp	transmembrane	TMEM179B (1 of 2)	transmembrane protein 179B [Source:HGNC Symbol;Acc:HGNC:33744]
ENSDARG00000056235	69	79	38	79	79	66	45	78	78	78	78	82	82	80	79	79	81	No.Diff.Exp	non-transmembrane	smndc1	survival motor neuron domain containing 1 [Source:ZFIN;Acc:ZDB-GENE-030131-614]
ENSDARG00000056252	34	56	51	60	0	57	50	60	60	48	61	67	63	64	65	65	47	No.Diff.Exp	transmembrane	sort1b	sortilin 1b [Source:ZFIN;Acc:ZDB-GENE-030131-7447]
ENSDARG00000056259	8	60	23.5	60	60	58	39	59	59	60	60	70	68	43	67	66	73	No.Diff.Exp	transmembrane	tmem131	transmembrane protein 131 [Source:ZFIN;Acc:ZDB-GENE-130530-662]
ENSDARG00000056307	75	78	86	82	83	82	61	82	82	79	82	96	0	89	92	0	97	No.Diff.Exp	non-transmembrane	znf706	zinc finger protein 706 [Source:ZFIN;Acc:ZDB-GENE-040718-454]
ENSDARG00000056318	42	63	54	58	64	38	41	62	61	63	63	72	75	72	69	67	41	No.Diff.Exp	non-transmembrane	kansl2	KAT8 regulatory NSL complex subunit 2 [Source:ZFIN;Acc:ZDB-GENE-041010-67]
ENSDARG00000056338	0	64	60	0	63	63	60	62	62	64	64	61	70	60	71	68	86	No.Diff.Exp	non-transmembrane	szrd1	SUZ RNA binding domain containing 1 [Source:ZFIN;Acc:ZDB-GENE-050522-55]
ENSDARG00000056346	0	55	33	0	0	54	45	55	56	53	57	78	79	60	76	78	80	No.Diff.Exp	non-transmembrane	acap1	ArfGAP with coiled-coil, ankyrin repeat and PH domains 1 [Source:ZFIN;Acc:ZDB-GENE-070112-1242]
ENSDARG00000056378	38	27	42	43	43	38	19	40	40	37	37	54	55	52	53	37	49	No.Diff.Exp	transmembrane	ifi30	interferon, gamma-inducible protein 30 [Source:ZFIN;Acc:ZDB-GENE-030131-8447]
ENSDARG00000056414	11	46	47	49	50	50	45	49	49	50	50	33.5	60	55	55	53	71	No.Diff.Exp	non-transmembrane	usp1	ubiquitin specific peptidase 1 [Source:ZFIN;Acc:ZDB-GENE-030131-726]
ENSDARG00000056438	33	78	74	74	75	26	53	0	0	45	45	85	89	84	86	87	79	dre_NK	non-transmembrane	her9	hairy-related 9 [Source:ZFIN;Acc:ZDB-GENE-011213-1]
ENSDARG00000056467	28	46	44	46	0	51	49	49	49	50	50	61	63	59	59	60	69	No.Diff.Exp	transmembrane	tmub2	transmembrane and ubiquitin-like domain containing 2 [Source:ZFIN;Acc:ZDB-GENE-030616-254]
ENSDARG00000056475	24.5	0	31	30	32	12	0	0	5	13	13	67	61	66	66	56	81	No.Diff.Exp	non-transmembrane	C2H6orf52	chromosome 6 open reading frame 52 [Source:HGNC Symbol;Acc:HGNC:20881]
ENSDARG00000056481	53	55	55	50	50	51	47	51	51	50	50	80	80	54	80	69	85	dre_Tcell	non-transmembrane	vat1	vesicle amine transport 1 [Source:ZFIN;Acc:ZDB-GENE-030616-178]
ENSDARG00000056490	29	57	73	0	0	71	78	72	71	65	77	96	96	90	89	94	0	No.Diff.Exp	non-transmembrane	SSBP4 (2 of 2)	single stranded DNA binding protein 4 [Source:HGNC Symbol;Acc:HGNC:15676]
ENSDARG00000056502	0	0	0	0	0	0	0	0	0	0	0	0	0	0	0	0	0	No.Diff.Exp	transmembrane	si:ch73-334d15.4	si:ch73-334d15.4 [Source:ZFIN;Acc:ZDB-GENE-091204-184]
ENSDARG00000056509	42	84	79	84	84	83	62	83	83	83	83	94	95	94	94	94	95	No.Diff.Exp	non-transmembrane	pdik1l	PDLIM1 interacting kinase 1 like [Source:ZFIN;Acc:ZDB-GENE-051113-236]
ENSDARG00000056510	56	0	55	47	48	48	43	46	48	48	48	62	67	66	60	59	72	No.Diff.Exp	non-transmembrane	gstk1	glutathione S-transferase kappa 1 [Source:ZFIN;Acc:ZDB-GENE-040718-298]
ENSDARG00000056532	0	73	63	64	62	50	47	61	60	59	59	79	83	60	78	48.5	84	No.Diff.Exp	transmembrane	serinc2	serine incorporator 2 [Source:ZFIN;Acc:ZDB-GENE-041111-296]
ENSDARG00000056557	88	94	93	94	94	93	70	94	93	93	94	96	97	95	96	96	51	No.Diff.Exp	non-transmembrane	copb1	coatomer protein complex, subunit beta 1 [Source:ZFIN;Acc:ZDB-GENE-030219-38]
ENSDARG00000056583	0	63	58	63	62	38	0	60	59	54	60	78	78	71	0	77	80	No.Diff.Exp	non-transmembrane	ndufs6	NADH dehydrogenase (ubiquinone) Fe-S protein 6 [Source:ZFIN;Acc:ZDB-GENE-040912-86]
ENSDARG00000056621	47	70	67	69	69	68	62	68	68	67	67	67	67.5	67	66	65	0	No.Diff.Exp	non-transmembrane	ctcf	CCCTC-binding factor (zinc finger protein) [Source:ZFIN;Acc:ZDB-GENE-040624-5]
ENSDARG00000056623	0	83	82	84	83	58	79	83	83	83	83	0	0	0	0	0	83	No.Diff.Exp	non-transmembrane	ptenb	phosphatase and tensin homolog B [Source:ZFIN;Acc:ZDB-GENE-030616-47]
ENSDARG00000056638	18	46	69	42	0	68	47	69	69	62	70	72	71	69	69	0	77	No.Diff.Exp	non-transmembrane	pir	pirin [Source:ZFIN;Acc:ZDB-GENE-040718-288]
ENSDARG00000056639	0	23	24	22	33	29	25	12	29	28	29	20	0	0	16	15	16	dre_Tcell	non-transmembrane	rltpr	RGD motif, leucine rich repeats, tropomodulin domain and proline-rich containing [Source:ZFIN;Acc:ZDB-GENE-050419-197]
ENSDARG00000056726	0	57	49	51.5	48	47	45.5	45	47	47.5	48	60.5	59.5	59	61	60.5	52	No.Diff.Exp	transmembrane	mettl7a	methyltransferase like 7A [Source:ZFIN;Acc:ZDB-GENE-061027-239]
ENSDARG00000056798	0	21.0952	0	26	21	6	19.25	21.3333	23.2222	23.5556	24.0833	0	0	0	0	0	34	No.Diff.Exp	transmembrane	zgc:123297	zgc:123297 [Source:ZFIN;Acc:ZDB-GENE-051127-9]
ENSDARG00000056803	0	0	58	0	0	50	91	92	92	91	92	98	99	90	97	0	99	dre_Tcell	non-transmembrane	ap1s1	adaptor-related protein complex 1, sigma 1 subunit [Source:ZFIN;Acc:ZDB-GENE-040426-1119]
ENSDARG00000056831	0	94	94	93	93	94	0	94	55	94	94	97	97	97	93	96	97	No.Diff.Exp	non-transmembrane	gng2	guanine nucleotide binding protein (G protein), gamma 2 [Source:ZFIN;Acc:ZDB-GENE-050417-59]
ENSDARG00000056855	0	45	0	41	37	38	35	40	39	38	38	59	53	48	38	53	59	No.Diff.Exp	non-transmembrane	GATC	glutamyl-tRNA(Gln) amidotransferase, subunit C [Source:HGNC Symbol;Acc:HGNC:25068]
ENSDARG00000056856	17.5	49	46	47	50	43	36	48	45	49	49	66	67	63	64	52	78	No.Diff.Exp	non-transmembrane	tax1bp1b	Tax1 (human T-cell leukemia virus type I) binding protein 1b [Source:ZFIN;Acc:ZDB-GENE-030131-2872]
ENSDARG00000056896	0	37	36	37	42	40	26	39	40	42	42	46	49	44	44	44	34	No.Diff.Exp	non-transmembrane	ttc12	tetratricopeptide repeat domain 12 [Source:ZFIN;Acc:ZDB-GENE-071016-4]
ENSDARG00000056929	0	0	0	0	0	0	0	0	0	0	0	32	26	21	26	11	34	No.Diff.Exp	non-transmembrane	kdm6bb	lysine (K)-specific demethylase 6B, b [Source:ZFIN;Acc:ZDB-GENE-040724-166]
ENSDARG00000056964	0	77	75	48	77	86	67	87	87	87	87	87	89	89	91	90	92	No.Diff.Exp	non-transmembrane	ilk	integrin-linked kinase [Source:ZFIN;Acc:ZDB-GENE-040426-1435]
ENSDARG00000056966	0	72	66	74	74	74	72	73	73	74	74	75	70	75	69	27	69	dre_NK	non-transmembrane	nek7	NIMA-related kinase 7 [Source:ZFIN;Acc:ZDB-GENE-040801-136]
ENSDARG00000056984	0	27	50	48	43	50	0	48	47	0	51	65	57	62	61	62	75	No.Diff.Exp	non-transmembrane	rad9a	RAD9 checkpoint clamp component A [Source:ZFIN;Acc:ZDB-GENE-040426-935]
ENSDARG00000057007	0	84	80	80	81	0	0	0	0	0	0	91	92	79	0	90	98	No.Diff.Exp	non-transmembrane	ctbp1	C-terminal binding protein 1 [Source:ZFIN;Acc:ZDB-GENE-010130-1]
ENSDARG00000057010	0	21	0	0	0	0	0	0	0	0	0	0	0	0	0	0	0	No.Diff.Exp	non-transmembrane	si:dkey-154b15.1	si:dkey-154b15.1 [Source:ZFIN;Acc:ZDB-GENE-060503-52]
ENSDARG00000057021	0	58	80	83	83	75.5	61	83	84	85	85	91	91	87	92	84	95	No.Diff.Exp	non-transmembrane	vps36	vacuolar protein sorting 36 homolog (S. cerevisiae) [Source:ZFIN;Acc:ZDB-GENE-030131-7753]
ENSDARG00000057026	76	64	93	93	93	94	55	90	84.75	94	94	90	91	87	91	90	99	No.Diff.Exp	non-transmembrane	ran	RAN, member RAS oncogene family [Source:ZFIN;Acc:ZDB-GENE-990415-88]
ENSDARG00000057027	0	0	27	34	0	21	30	33	32	0	34	52	51	55	51	52	64	No.Diff.Exp	transmembrane	rtn2b	reticulon 2b [Source:ZFIN;Acc:ZDB-GENE-060331-95]
ENSDARG00000057075	0	80	73	78	80	65	0	77	78	79	79	80	78	77	78	78	85	No.Diff.Exp	non-transmembrane	lamtor3	late endosomal/lysosomal adaptor, MAPK and MTOR activator 3 [Source:ZFIN;Acc:ZDB-GENE-050522-345]
ENSDARG00000057089	74	67	27	69	0	65	0	67	67	0	66	80	81	80	79	80	53	No.Diff.Exp	non-transmembrane	ftsj1	FtsJ RNA methyltransferase homolog 1 (E. coli) [Source:ZFIN;Acc:ZDB-GENE-041114-83]
ENSDARG00000057093	38	61	0	63	62	55	48	64	64	64	64	68	68	62	66	66	74	No.Diff.Exp	non-transmembrane	kdm5ba	lysine (K)-specific demethylase 5Ba [Source:ZFIN;Acc:ZDB-GENE-030131-5379]
ENSDARG00000057167	62	84	80	84	83	73	60	83	83	83	83	90	89	85	60	87	91	No.Diff.Exp	non-transmembrane	eif4g2b	eukaryotic translation initiation factor 4, gamma 2b [Source:ZFIN;Acc:ZDB-GENE-030131-6550]
ENSDARG00000057234	64	74	72	73	73	74	62	65	68.5	74	74	78	79	66	80	77	86	No.Diff.Exp	non-transmembrane	chtopa	chromatin target of PRMT1a [Source:ZFIN;Acc:ZDB-GENE-030131-210]
ENSDARG00000057249	50	66	69	70	69	69	26	69	70	65	70	77	76	65	76	76	87	No.Diff.Exp	non-transmembrane	zmynd11	zinc finger, MYND-type containing 11 [Source:ZFIN;Acc:ZDB-GENE-050522-301]
ENSDARG00000057299	0	67	66	0	43	61	58	60	61	49	61	72	73	70	73	36	73	No.Diff.Exp	non-transmembrane	pbdc1	polysaccharide biosynthesis domain containing 1 [Source:ZFIN;Acc:ZDB-GENE-040718-459]
ENSDARG00000057484	52	71	70	70	72	0	72	51	51	72	62.5	72	73	69	67	73	75	No.Diff.Exp	non-transmembrane	srsf2a	serine/arginine-rich splicing factor 2a [Source:ZFIN;Acc:ZDB-GENE-040426-2706]
ENSDARG00000057513	13	44	35	29	46	46	43	45	45	48	48	64	64	59	64	63	72	No.Diff.Exp	non-transmembrane	mdm4	MDM4, p53 regulator [Source:ZFIN;Acc:ZDB-GENE-030131-6872]
ENSDARG00000057556	49	95	93	32	87.6667	48	46.5	87.5	80.5	95	83.3333	97	98	89	97	97	97	No.Diff.Exp	non-transmembrane	RPL17	ribosomal protein L17 [Source:HGNC Symbol;Acc:HGNC:10307]
ENSDARG00000057633	41	67	66	67	68	0	67	66	66	66	66	68	71	68	69	69	0	dre_Tcell	transmembrane	cxcr4a	chemokine (C-X-C motif) receptor 4a [Source:ZFIN;Acc:ZDB-GENE-020102-1]
ENSDARG00000057644	0	39	0	0	39	0	27	37	37	0	37	26	50	43	48	40	59	No.Diff.Exp	transmembrane	adam8b	ADAM metallopeptidase domain 8b [Source:ZFIN;Acc:ZDB-GENE-070808-1]
ENSDARG00000057665	0	0	0	0	0	0	0	0	0	0	0	0	0	0	0	0	50	No.Diff.Exp	transmembrane	sprn2	shadow of prion protein 2 [Source:ZFIN;Acc:ZDB-GENE-041221-1]
ENSDARG00000057672	45	54	50	49	47	39	32	47	46	47	47	58	60	57	60	59	73	No.Diff.Exp	transmembrane	ppapdc1b	phosphatidic acid phosphatase type 2 domain containing 1B [Source:ZFIN;Acc:ZDB-GENE-040704-54]
ENSDARG00000057676	45	85	59	76	77	76	22	76	76	76	76	89	81	76	73	0	94	No.Diff.Exp	non-transmembrane	golga7	golgin A7 [Source:ZFIN;Acc:ZDB-GENE-040625-142]
ENSDARG00000057691	0	0	0	0	0	0	0	0	0	0	0	86.5	87	0	83.5	82	97	No.Diff.Exp	non-transmembrane	srsf1a	serine/arginine-rich splicing factor 1a [Source:ZFIN;Acc:ZDB-GENE-040426-1950]
ENSDARG00000057714	0	60	65	64	0	50	40	66	64	66	0	46	69	0	71	69	10	dre_NK	non-transmembrane	cmah	cytidine monophospho-N-acetylneuraminic acid hydroxylase [Source:ZFIN;Acc:ZDB-GENE-040704-33]
ENSDARG00000057772	11	34	32	36	35	35	25	36	36	37	37	40	44	19	31	28	68	No.Diff.Exp	non-transmembrane	2007-03-01	membrane-associated ring finger (C3HC4) 7 [Source:ZFIN;Acc:ZDB-GENE-080204-121]
ENSDARG00000057782	26	48	46	50	47	46	37	47	48	49	50	23	58	0	56	49	70	No.Diff.Exp	non-transmembrane	baz2ba	bromodomain adjacent to zinc finger domain, 2Ba [Source:ZFIN;Acc:ZDB-GENE-070615-37]
ENSDARG00000057805	66	62	66	63	58.6667	37	68	67	67	0	67	75	74	71	73	67.5	80	No.Diff.Exp	non-transmembrane	mrpl28	mitochondrial ribosomal protein L28 [Source:ZFIN;Acc:ZDB-GENE-050522-113]
ENSDARG00000057826	26.5	47	46	0	33	0	0	0	0	0	0	61	62	55	60	58	61	No.Diff.Exp	transmembrane	si:ch73-61d6.3	si:ch73-61d6.3 [Source:ZFIN;Acc:ZDB-GENE-091204-109]
ENSDARG00000057853	81	90	90	91	79	90	87	90	76	90	90	50	77	93	92	92	93	No.Diff.Exp	transmembrane	atp6v0ca	ATPase, H+ transporting, lysosomal, V0 subunit ca [Source:ZFIN;Acc:ZDB-GENE-020419-23]
ENSDARG00000057854	67	93	92	76	90	90	52	90	90	90	90	86	88	71.5	86	86	96	dre_NK	non-transmembrane	sap18	Sin3A-associated protein [Source:ZFIN;Acc:ZDB-GENE-040426-1679]
ENSDARG00000057867	56	0	69	74	65	74	67	75	74	75	75	68	85	67	68	76	79	No.Diff.Exp	non-transmembrane	lasp1	LIM and SH3 protein 1 [Source:ZFIN;Acc:ZDB-GENE-030131-1936]
ENSDARG00000057882	0	75	88	87	89	84	76	88	88	87	87	89	88.5	90	89	89	94	No.Diff.Exp	non-transmembrane	arpc3	actin related protein 2/3 complex, subunit 3 [Source:ZFIN;Acc:ZDB-GENE-040625-107]
ENSDARG00000057884	21	34	25	25.5	33	23.5	25	32	31.5	31.5	32	41.6667	44	28	41	42	44	No.Diff.Exp	non-transmembrane	zgc:114174	zgc:114174 [Source:ZFIN;Acc:ZDB-GENE-050626-103]
ENSDARG00000057890	15	30	0	10	20	16	0	0	0	19	18	28	26	17.5	19.5	19.5	44	No.Diff.Exp	non-transmembrane	TTC31	tetratricopeptide repeat domain 31 [Source:HGNC Symbol;Acc:HGNC:25759]
ENSDARG00000057912	0	0	94	94	91	0	61	88.4375	95	0	94.5	94	94	95	84	86	95	No.Diff.Exp	non-transmembrane	eif1axb	eukaryotic translation initiation factor 1A, X-linked, b [Source:ZFIN;Acc:ZDB-GENE-030131-1319]
ENSDARG00000057940	18	27	26	27	7	22	16	27	27	27	28	30	38	27	35	34	40	No.Diff.Exp	non-transmembrane	dido1	death inducer-obliterator 1 [Source:ZFIN;Acc:ZDB-GENE-030131-6117]
ENSDARG00000057974	0	0	27.5	39	40	31	11	36	36	36	36	54	53	0	0	0	68	No.Diff.Exp	non-transmembrane	parp12b	poly (ADP-ribose) polymerase family, member 12b [Source:ZFIN;Acc:ZDB-GENE-030131-2617]
ENSDARG00000057986	0	61	61	66	70	56	38	70	69	65	70	75	79	76	78	77	83	No.Diff.Exp	transmembrane	ints8	integrator complex subunit 8 [Source:ZFIN;Acc:ZDB-GENE-050522-556]
ENSDARG00000058000	0	43	12	41	43	42	35	43	42	44	44	39	41	39	39	34	40	No.Diff.Exp	non-transmembrane	cep350	centrosomal protein 350 [Source:ZFIN;Acc:ZDB-GENE-030131-6975]
ENSDARG00000058022	82	85	88	83	51	89	88	89	89	86	87	88	90	90	89	91	92	No.Diff.Exp	transmembrane	ormdl2	ORMDL sphingolipid biosynthesis regulator 2 [Source:ZFIN;Acc:ZDB-GENE-060331-113]
ENSDARG00000058030	58	74	73	70	71	66	65	69	69	70	70	72	70	69	67	17.5	80	No.Diff.Exp	non-transmembrane	hspa14	heat shock protein 14 [Source:ZFIN;Acc:ZDB-GENE-041210-73]
ENSDARG00000058038	17	54	46	29	49	51	44	54	54	31	48	65	74	55	46	43	48	No.Diff.Exp	non-transmembrane	eml3	echinoderm microtubule associated protein like 3 [Source:ZFIN;Acc:ZDB-GENE-110304-3]
ENSDARG00000058041	0	81	77	73	76	73	70	76	72	74	74	83	82	81	80	80	85	No.Diff.Exp	non-transmembrane	ndufa8	NADH dehydrogenase (ubiquinone) 1 alpha subcomplex, 8 [Source:ZFIN;Acc:ZDB-GENE-040426-1688]
ENSDARG00000058044	0	0	0	74.5	0	94	71	93	93	94	94	97	99	99	99	0	87	No.Diff.Exp	non-transmembrane	rab1ba	zRAB1B, member RAS oncogene family a [Source:ZFIN;Acc:ZDB-GENE-040426-873]
ENSDARG00000058062	0	68	78	79	82	79	0	78	78	71	80	80	61	80	80	83	87	No.Diff.Exp	transmembrane	magt1	magnesium transporter 1 [Source:ZFIN;Acc:ZDB-GENE-030131-3667]
ENSDARG00000058094	0	20	0	23	0	20	25	25	25	25	25	28	29	31	23	24	18	No.Diff.Exp	non-transmembrane	ciarta	circadian associated repressor of transcription a [Source:ZFIN;Acc:ZDB-GENE-030131-7016]
ENSDARG00000058100	39	51	49	0	45	0	41	45	44	48	48	54.75	57.25	0	51	50.3333	65	No.Diff.Exp	transmembrane	b3gnt3	UDP-GlcNAc:betaGal beta-1,3-N-acetylglucosaminyltransferase 3 [Source:ZFIN;Acc:ZDB-GENE-030131-8875]
ENSDARG00000058105	0	96	96	97	97	98	80.5	96.3333	91.8333	97	96	99	96	96	99	100	100	No.Diff.Exp	non-transmembrane	rpl36a	ribosomal protein L36A [Source:ZFIN;Acc:ZDB-GENE-020423-1]
ENSDARG00000058108	16.5	62	53	60	47.3333	17	46	56	56	0	56	67	68	18.5	63	61	75	No.Diff.Exp	non-transmembrane	EPS8L2	EPS8-like 2 [Source:HGNC Symbol;Acc:HGNC:21296]
ENSDARG00000058115	53.5	74	72	73	77	68	53	78	75	73	73	78	84	73	81	75	86	No.Diff.Exp	transmembrane	fgfr2	fibroblast growth factor receptor 2 [Source:ZFIN;Acc:ZDB-GENE-030323-1]
ENSDARG00000058128	5	78	82	83	84	84	83	84	84	82	84	89	90	0	89	84	94	dre_Myel	non-transmembrane	msna	moesin a [Source:ZFIN;Acc:ZDB-GENE-021211-2]
ENSDARG00000058203	54	89	87	90	0	90	0	90	89	69	90	94	94	93	94	94	18.75	No.Diff.Exp	non-transmembrane	smc1al	structural maintenance of chromosomes 1A, like [Source:ZFIN;Acc:ZDB-GENE-040426-57]
ENSDARG00000058206	0	67	56.3333	0	68	0	0	0	0	0	0	62.5	73	75	69	71	78	No.Diff.Exp	non-transmembrane	si:ch211-153b23.5	si:ch211-153b23.5 [Source:ZFIN;Acc:ZDB-GENE-030131-9744]
ENSDARG00000058212	38	54	48	49	47	31.9286	0	29.8966	28.8261	29.9524	30.3235	62	61	57	54	62	63	No.Diff.Exp	transmembrane	ndnl2	necdin-like 2 [Source:ZFIN;Acc:ZDB-GENE-031107-3]
ENSDARG00000058225	61	0	99	97	98	0	0	98	98	98	98	99.5	99	95.5	98	97	99	No.Diff.Exp	non-transmembrane	arpc4l	actin related protein 2/3 complex, subunit 4, like [Source:ZFIN;Acc:ZDB-GENE-040808-18]
ENSDARG00000058230	0	75	85	84	85	85	65	85	85	85	85	87	87.5	77	87.5	86	95	No.Diff.Exp	non-transmembrane	rps6kb1b	ribosomal protein S6 kinase b, polypeptide 1b [Source:ZFIN;Acc:ZDB-GENE-040426-2038]
ENSDARG00000058232	0	55	57	52	59	24	29	37	37	39	40	68	76	46	75	73	68	dre_Tcell	non-transmembrane	fbrsl1	fibrosin-like 1 [Source:ZFIN;Acc:ZDB-GENE-070705-487]
ENSDARG00000058302	0	67.5	0	78	72	71	70	77	77	77	77	88	87	0	81	0	90	dre_Myel	non-transmembrane	sh3bgrl	SH3 domain binding glutamate-rich protein like [Source:ZFIN;Acc:ZDB-GENE-040426-1376]
ENSDARG00000058306	72	84	77	85	82	83	58	83	77	83	66	86	85	83	83	85	92	No.Diff.Exp	non-transmembrane	prpf18	PRP18 pre-mRNA processing factor 18 homolog (yeast) [Source:ZFIN;Acc:ZDB-GENE-040704-45]
ENSDARG00000058325	31	37.3333	34	37	34	33	28.5	38	39	36.5	36.5	33	41	27	38	39	54	No.Diff.Exp	non-transmembrane	casp8	caspase 8, apoptosis-related cysteine peptidase [Source:ZFIN;Acc:ZDB-GENE-000713-1]
ENSDARG00000058327	36	36	41	42	35	43	36	42	41	43	43	42.8333	42.3333	0	0	0	0	No.Diff.Exp	non-transmembrane	neu3.3	sialidase 3 (membrane sialidase), tandem duplicate 3 [Source:ZFIN;Acc:ZDB-GENE-061103-511]
ENSDARG00000058328	0	94	93	0	97	49	38	93	94	95	95	94	98	93	98	98	97	dre_Tcell	non-transmembrane	lsm7	LSM7 homolog, U6 small nuclear RNA and mRNA degradation associated [Source:ZFIN;Acc:ZDB-GENE-030131-8284]
ENSDARG00000058348	0	65	0	0	0	0	0	0	0	0	0	77	77	77	70	70	54	No.Diff.Exp	non-transmembrane	scinlb	scinderin like b [Source:ZFIN;Acc:ZDB-GENE-040426-2068]
ENSDARG00000058349	0	99	99	99	99	96	99	99	97.3333	99	99	100	0	99	99	0	100	No.Diff.Exp	non-transmembrane	polr2l	polymerase (RNA) II (DNA directed) polypeptide L [Source:ZFIN;Acc:ZDB-GENE-050522-181]
ENSDARG00000058354	0	56	67	60	56	70	46	72	71	61	72	44	0	79	79	80	80	No.Diff.Exp	transmembrane	selt1a	selenoprotein T, 1a [Source:ZFIN;Acc:ZDB-GENE-030327-6]
ENSDARG00000058366	55	62	61	65	58	0	0	0	0	0	0	72	74	0	72	71	59	No.Diff.Exp	non-transmembrane	si:dkey-222f8.3	si:dkey-222f8.3 [Source:ZFIN;Acc:ZDB-GENE-030131-3658]
ENSDARG00000058425	51	80	92	93	93	84	63	93	93	93	93	95	96	94	95	92	91	No.Diff.Exp	non-transmembrane	rab35b	RAB35, member RAS oncogene family b [Source:ZFIN;Acc:ZDB-GENE-040801-62]
ENSDARG00000058444	0	81	81	83	82	59	39	83	83	83	83	86	87	85	87	86	88	No.Diff.Exp	non-transmembrane	snx6	sorting nexin 6 [Source:ZFIN;Acc:ZDB-GENE-050913-152]
ENSDARG00000058451	0	57	61	63	77	72	0	75.5	64.6	74	74	78	78	74	77	34	79	No.Diff.Exp	non-transmembrane	rpl6	ribosomal protein L6 [Source:ZFIN;Acc:ZDB-GENE-030131-8671]
ENSDARG00000058454	0	94	96	98	98.5	97	51	97	82	92.5	97	98	99	99	97	82	100	No.Diff.Exp	non-transmembrane	dynll1	dynein, light chain, LC8-type 1 [Source:ZFIN;Acc:ZDB-GENE-040426-1961]
ENSDARG00000058463	36	52	57	49	52	57	46	56	56	58	58	0	0	0	0	0	61	No.Diff.Exp	non-transmembrane	ndufab1a	NADH dehydrogenase (ubiquinone) 1, alpha/beta subcomplex, 1a [Source:ZFIN;Acc:ZDB-GENE-040801-1]
ENSDARG00000058467	62	71	66	69	59	62	42	70	70	71	71	79	80	76	77	72	68	No.Diff.Exp	non-transmembrane	prpf40a	PRP40 pre-mRNA processing factor 40 homolog A [Source:ZFIN;Acc:ZDB-GENE-030131-274]
ENSDARG00000058504	0	77	78	79	84	54	57	78	84	77	81	81.5	81.5	75	83.5	83.5	89	No.Diff.Exp	non-transmembrane	ap1s2	adaptor-related protein complex 1, sigma 2 subunit [Source:ZFIN;Acc:ZDB-GENE-030131-5448]
ENSDARG00000058537	0	0	0	0	0	0	0	0	0	0	0	24	27	0	0	0	41	No.Diff.Exp	transmembrane	si:dkey-102c8.2	si:dkey-102c8.2 [Source:ZFIN;Acc:ZDB-GENE-050208-329]
ENSDARG00000058551	0	55	56	55	56	46	45	51	42	53	53	64	67	68	0	0	66	dre_Myel	transmembrane	popdc3	popeye domain containing 3 [Source:ZFIN;Acc:ZDB-GENE-040624-10]
ENSDARG00000058647	65	45	50	76	73	65	52	75	74	72	76	86	82	81	79	48	90	dre_Myel	non-transmembrane	hck	HCK proto-oncogene, Src family tyrosine kinase [Source:ZFIN;Acc:ZDB-GENE-090313-72]
ENSDARG00000058660	33	0	0	0	0	0	0	0	0	0	0	42	46	34	38	40	54	No.Diff.Exp	non-transmembrane	ilf3a	interleukin enhancer binding factor 3a [Source:ZFIN;Acc:ZDB-GENE-030131-3151]
ENSDARG00000058666	0	46	41	44	22	31	23	46	46	46	47	0	0	0	0	0	53	dre_Tcell	transmembrane	dennd2da	DENN/MADD domain containing 2Da [Source:ZFIN;Acc:ZDB-GENE-061013-542]
ENSDARG00000058672	0	0	0	7	17	18	16	18	18	18	18	22.5	21.5	0	0	0	26.3333	No.Diff.Exp	non-transmembrane	NUGGC (1 of 4)	nuclear GTPase, germinal center associated [Source:HGNC Symbol;Acc:HGNC:33550]
ENSDARG00000058673	0	0	0	0	0	0	0	0	0	0	0	27	23	0	31	26	24	dre_NK	transmembrane	nkl.2	NK-lysin tandem duplicate 2 [Source:ZFIN;Acc:ZDB-GENE-150806-1]
ENSDARG00000058682	0	0	0	0	0	0	0	0	0	0	0	30	35	33	37	34	42	dre_Tcell	transmembrane	si:dkey-184p9.9	si:dkey-184p9.9 [Source:ZFIN;Acc:ZDB-GENE-091204-31]
ENSDARG00000058696	0	96	93	96	96	72	50.5	96	96	96	96	96	97	65	96	97	60	No.Diff.Exp	non-transmembrane	tbl1xr1a	transducin (beta)-like 1 X-linked receptor 1a [Source:ZFIN;Acc:ZDB-GENE-050522-314]
ENSDARG00000058729	56	81	77	80	54	75	47	82	82	83	83	79	78	78	79	77	83	No.Diff.Exp	non-transmembrane	akirin2	akirin 2 [Source:ZFIN;Acc:ZDB-GENE-040426-2944]
ENSDARG00000058731	11	56	55	32	57	54	56	53	33	54	54	60.5	60	53	60	61	72	No.Diff.Exp	transmembrane	slc2a6	solute carrier family 2 (facilitated glucose transporter), member 6 [Source:ZFIN;Acc:ZDB-GENE-081104-301]
ENSDARG00000058732	65	83	77	76	78	72	42	71	71	73	73	81	78	71	75	58	82	No.Diff.Exp	non-transmembrane	scgn	secretagogin, EF-hand calcium binding protein [Source:ZFIN;Acc:ZDB-GENE-041010-82]
ENSDARG00000058746	0	50	52	50	49	50	51	48	48	49	49	42	63	67	64	66	66	No.Diff.Exp	non-transmembrane	ubap1	ubiquitin associated protein 1 [Source:ZFIN;Acc:ZDB-GENE-040426-950]
ENSDARG00000058794	0	0	0	0	0	0	0	0	0	0	0	0	0	0	0	0	0	No.Diff.Exp	transmembrane	zgc:113324	zgc:113324 [Source:ZFIN;Acc:ZDB-GENE-050306-13]
ENSDARG00000058803	0	77	67	0	0	38	33	67	67	55	67	83	83	77	79	80.5	0	No.Diff.Exp	non-transmembrane	grk1a	G protein-coupled receptor kinase 1 a [Source:ZFIN;Acc:ZDB-GENE-050823-1]
ENSDARG00000058824	59	66	64	58	0	58	50	58	58	60	60	69	72	67	64	43.5	77	No.Diff.Exp	non-transmembrane	mrpl4	mitochondrial ribosomal protein L4 [Source:ZFIN;Acc:ZDB-GENE-050522-388]
ENSDARG00000058830	52	0	0	0	0	0	0	38	39	0	0	88	86	70	84	85	82	No.Diff.Exp	transmembrane	zdhhc3b	zinc finger, DHHC-type containing 3b [Source:ZFIN;Acc:ZDB-GENE-061110-19]
ENSDARG00000058839	0	23	21	25	24	22	13	25	22	18	26	22	33	25	30	26	19	dre_Tcell	transmembrane	SUSD1 (1 of 2)	sushi domain containing 1 [Source:HGNC Symbol;Acc:HGNC:25413]
ENSDARG00000058871	0	49	0	43	0	0	0	25.6429	29.5	28	28	56	56	52	55	56	45	No.Diff.Exp	non-transmembrane	FBXW12	F-box and WD repeat domain containing 12 [Source:HGNC Symbol;Acc:HGNC:20729]
ENSDARG00000058880	0	53	0	0	0	0	0	0	0	0	0	67	69	0	68	66	86	No.Diff.Exp	transmembrane	cldnj	claudin j [Source:ZFIN;Acc:ZDB-GENE-010328-10]
ENSDARG00000058946	0	38	0	0	0	0	0	0	0	0	0	0	0	0	0	0	35	No.Diff.Exp	non-transmembrane	CU856539.2
ENSDARG00000058964	19	35	30	25	31	34	29	34	33	35	34	42	47	37	43	0	51	dre_Myel	non-transmembrane	themis2	thymocyte selection associated family member 2 [Source:ZFIN;Acc:ZDB-GENE-110411-89]
ENSDARG00000058968	32	45	31	45	37	41	28	41	41	40	40	56	57	52	52	53	72	No.Diff.Exp	non-transmembrane	haus1	HAUS augmin-like complex, subunit 1 [Source:ZFIN;Acc:ZDB-GENE-091204-387]
ENSDARG00000058992	0	64	64	57	68	64	64	61	57	64	64	77.5	81	73	77	80	80	No.Diff.Exp	transmembrane	cers2b	ceramide synthase 2b [Source:ZFIN;Acc:ZDB-GENE-110408-40]
ENSDARG00000058993	61.5	74	72	76	76	74	63	76	75	76	75	84	86	83	85	85	59	No.Diff.Exp	non-transmembrane	rock1	Rho-associated, coiled-coil containing protein kinase 1 [Source:ZFIN;Acc:ZDB-GENE-100712-2]
ENSDARG00000059001	0	53	0	51	0	31	43	52	52	51	51	54.5	63	0	0	0	0	No.Diff.Exp	non-transmembrane	pim2	Pim-2 proto-oncogene, serine/threonine kinase [Source:ZFIN;Acc:ZDB-GENE-000831-6]
ENSDARG00000059029	27	51	50	0	48	45	46	52	52	40	51	59	59	58	54	24	65	No.Diff.Exp	transmembrane	mmp28	matrix metallopeptidase 28 [Source:ZFIN;Acc:ZDB-GENE-100226-1]
ENSDARG00000059060	0	57	59	59	55	57	53	52.5	57	55	57	54	49	41	45	46	40	No.Diff.Exp	non-transmembrane	lgalsla	lectin, galactoside-binding-like a [Source:ZFIN;Acc:ZDB-GENE-060616-24]
ENSDARG00000059070	69	60	78	77	78	76	68	79	79	80	80	85	80	73.5	84	82	86	No.Diff.Exp	non-transmembrane	gars	glycyl-tRNA synthetase [Source:ZFIN;Acc:ZDB-GENE-030131-9174]
ENSDARG00000059097	0	37	36	38	37	31	12.5	38	36	38	38	26	40	34	25	37	43	No.Diff.Exp	non-transmembrane	nktr	natural killer cell triggering receptor [Source:ZFIN;Acc:ZDB-GENE-030131-1725]
ENSDARG00000059109	15	23	22.5	18.5	0	21	0	18.5	20.6667	21.5	21.5	53	54	37	20	51	75	No.Diff.Exp	non-transmembrane	si:dkeyp-113d7.1	si:dkeyp-113d7.1 [Source:ZFIN;Acc:ZDB-GENE-030131-755]
ENSDARG00000059123	0	54	55	55	56	0	50	54	54	54	56	57	70	65	66	69	69	No.Diff.Exp	non-transmembrane	plcd1a	phospholipase C, delta 1a [Source:ZFIN;Acc:ZDB-GENE-071004-78]
ENSDARG00000059128	0	58	0	60	61	57	54	63	66	63	61.5	73	72	81	82	74	87	No.Diff.Exp	non-transmembrane	uqcrh	ubiquinol-cytochrome c reductase hinge protein [Source:ZFIN;Acc:ZDB-GENE-051030-93]
ENSDARG00000059231	14	50	55	29.5	53	52	41	53	50	53	53	0	0	0	0	0	61	No.Diff.Exp	transmembrane	hephl1a	hephaestin-like 1a [Source:ZFIN;Acc:ZDB-GENE-070801-4]
ENSDARG00000059246	0	82	76	72	74	82	46	82	82	82	82	86	86	83	83	61	92	No.Diff.Exp	non-transmembrane	hnrnpd	heterogeneous nuclear ribonucleoprotein D [Source:ZFIN;Acc:ZDB-GENE-070424-97]
ENSDARG00000059298	0	65	54	55	63	54	18	56	56	56	56	79	0	68	79	78	90	No.Diff.Exp	transmembrane	spcs1	signal peptidase complex subunit 1 [Source:ZFIN;Acc:ZDB-GENE-050809-130]
ENSDARG00000059303	61	57	74	75	29.5	75	69	75	66.5	76	52	80	79	35	36	80	87	No.Diff.Exp	non-transmembrane	hnrnpl2	heterogeneous nuclear ribonucleoprotein L2 [Source:ZFIN;Acc:ZDB-GENE-040426-2707]
ENSDARG00000059304	0	0	63	0	62	60	58	59	52	61	61	63	68	65	71	68.5	61	No.Diff.Exp	non-transmembrane	chchd2	coiled-coil-helix-coiled-coil-helix domain containing 2 [Source:ZFIN;Acc:ZDB-GENE-040426-1737]
ENSDARG00000059305	0	46	31	39	40	40	39	43	41	40	41	0	0	0	0	0	0	No.Diff.Exp	transmembrane	tmem37	transmembrane protein 37 [Source:ZFIN;Acc:ZDB-GENE-040426-2208]
ENSDARG00000059323	0	73	72	72	69	55	72	71	71	71	71	82	83	82	82	82	84	No.Diff.Exp	transmembrane	rpn1	ribophorin I [Source:ZFIN;Acc:ZDB-GENE-030131-4286]
[truncated: 1,715 more rows]

## Sheet: Human
Gene ID \ Species	pmarinus	lchalumnae	xtropicalis	acarolinensis	ggallus	ttruncatus	meugenii	mmusculus	rnorvegicus	ptroglodytes	drerio	Differential Expression	Transmembrane Domain	Gene Name	Description
ENSG00000000419	0	80	82	47	83	89	50	91	91	100	81	No.Diff.Exp	non-transmembrane	DPM1	dolichyl-phosphate mannosyltransferase polypeptide 1, catalytic subunit [Source:HGNC Symbol;Acc:3005]
ENSG00000000457	0	54	49	55	65	71	52	80	81	99	51	No.Diff.Exp	non-transmembrane	SCYL3	SCY1-like 3 (S. cerevisiae) [Source:HGNC Symbol;Acc:19285]
ENSG00000000938	0	70	71	0	39	69	70	84	85	100	0	No.Diff.Exp	non-transmembrane	FGR	feline Gardner-Rasheed sarcoma viral oncogene homolog [Source:HGNC Symbol;Acc:3697]
ENSG00000001084	42	77	85	88	84	91	40	94	94	100	81	No.Diff.Exp	transmembrane	GCLC	glutamate-cysteine ligase, catalytic subunit [Source:HGNC Symbol;Acc:4311]
ENSG00000001167	67	86	84	94	77	93	65	100	100	100	79.5	No.Diff.Exp	non-transmembrane	NFYA	nuclear transcription factor Y, alpha [Source:HGNC Symbol;Acc:7804]
ENSG00000001461	39	62	67	16	84	95	63	90	91	99	58	No.Diff.Exp	transmembrane	NIPAL3	NIPA-like domain containing 3 [Source:HGNC Symbol;Acc:25233]
ENSG00000001497	0	21	34	37	35	77	31	69	62	82	30	No.Diff.Exp	non-transmembrane	LAS1L	LAS1-like (S. cerevisiae) [Source:HGNC Symbol;Acc:25726]
ENSG00000001561	0	63	58	72	69	85	79	82	83	100	56	No.Diff.Exp	transmembrane	ENPP4	ectonucleotide pyrophosphatase/phosphodiesterase 4 (putative) [Source:HGNC Symbol;Acc:3359]
ENSG00000001630	67	72	75	79	57	94	50	90	92	99	75	No.Diff.Exp	transmembrane	CYP51A1	cytochrome P450, family 51, subfamily A, polypeptide 1 [Source:HGNC Symbol;Acc:2649]
ENSG00000002549	62	71	69	57	71	88	55	90	91	100	68	No.Diff.Exp	non-transmembrane	LAP3	leucine aminopeptidase 3 [Source:HGNC Symbol;Acc:18449]
ENSG00000002586	0	42	0	48	42	57	0	0	42	98	0	hsa_NK	transmembrane	CD99	CD99 molecule [Source:HGNC Symbol;Acc:7082]
ENSG00000002726	41.5	54	52	27	53	75	46	78	79	97	52	No.Diff.Exp	transmembrane	AOC1	amine oxidase, copper containing 1 [Source:HGNC Symbol;Acc:80]
ENSG00000002822	0	57	31	64	30	79	61	81	83	99	53	No.Diff.Exp	transmembrane	MAD1L1	MAD1 mitotic arrest deficient-like 1 (yeast) [Source:HGNC Symbol;Acc:6762]
ENSG00000002834	58	0	79	89	79	94	84	96	97	100	67	No.Diff.Exp	non-transmembrane	LASP1	LIM and SH3 protein 1 [Source:HGNC Symbol;Acc:6513]
ENSG00000002919	0	47	36	52	41.5	90	72	83	87	99	48	No.Diff.Exp	non-transmembrane	SNX11	sorting nexin 11 [Source:HGNC Symbol;Acc:14975]
ENSG00000002933	0	0	0	0	0	0	0	55	56	98	0	No.Diff.Exp	transmembrane	TMEM176A	transmembrane protein 176A [Source:HGNC Symbol;Acc:24930]
ENSG00000003056	0	63	45	66	64	87	83	92	91	100	47	No.Diff.Exp	transmembrane	M6PR	mannose-6-phosphate receptor (cation dependent) [Source:HGNC Symbol;Acc:6752]
ENSG00000003137	32	82	73	0	62	97	88	96	96	100	74	No.Diff.Exp	transmembrane	CYP26B1	cytochrome P450, family 26, subfamily B, polypeptide 1 [Source:HGNC Symbol;Acc:20581]
ENSG00000003147	52	70	64	71	73	81	60	89	89	99	55	No.Diff.Exp	transmembrane	ICA1	islet cell autoantigen 1, 69kDa [Source:HGNC Symbol;Acc:5343]
ENSG00000003249	0	31	31	29	36	0	38	45	46	95	24	No.Diff.Exp	non-transmembrane	DBNDD1	dysbindin (dystrobrevin binding protein 1) domain containing 1 [Source:HGNC Symbol;Acc:28455]
ENSG00000003393	13	66	68	78	80	85	65	92	91	100	55.5	No.Diff.Exp	non-transmembrane	ALS2	amyotrophic lateral sclerosis 2 (juvenile) [Source:HGNC Symbol;Acc:443]
ENSG00000003402	19	21	37	43	49	76	52	67	68	100	22.5	No.Diff.Exp	non-transmembrane	CFLAR	CASP8 and FADD-like apoptosis regulator [Source:HGNC Symbol;Acc:1876]
ENSG00000003436	9	0	0	47	48	82	38	59	60	99	31	No.Diff.Exp	transmembrane	TFPI	tissue factor pathway inhibitor (lipoprotein-associated coagulation inhibitor) [Source:HGNC Symbol;Acc:11760]
ENSG00000003756	49	75	0	86	85	91	87	98	98	100	58	No.Diff.Exp	non-transmembrane	RBM5	RNA binding motif protein 5 [Source:HGNC Symbol;Acc:9902]
ENSG00000004059	78	66	0	0	81	89	0	100	100	100	90.3333	No.Diff.Exp	non-transmembrane	ARF5	ADP-ribosylation factor 5 [Source:HGNC Symbol;Acc:658]
ENSG00000004139	21.5	66	59	71	72	95	84	94	93	100	60	No.Diff.Exp	non-transmembrane	SARM1	sterile alpha and TIR motif containing 1 [Source:HGNC Symbol;Acc:17074]
ENSG00000004455	29	69	77	56	84	67	0	95	90	97	78	No.Diff.Exp	non-transmembrane	AK2	adenylate kinase 2 [Source:HGNC Symbol;Acc:362]
ENSG00000004468	0	0	36	0	42	45	33	58	56	99	0	No.Diff.Exp	transmembrane	CD38	CD38 molecule [Source:HGNC Symbol;Acc:1667]
ENSG00000004478	0	57	66	57	74	89	81	90	90	99	61	No.Diff.Exp	non-transmembrane	FKBP4	FK506 binding protein 4, 59kDa [Source:HGNC Symbol;Acc:3720]
ENSG00000004487	72	62	85	91	87	92	68	96	96	87	82	No.Diff.Exp	non-transmembrane	KDM1A	lysine (K)-specific demethylase 1A [Source:HGNC Symbol;Acc:29079]
ENSG00000004534	0	0	31	55	57	91	70	88	89	98	24	No.Diff.Exp	non-transmembrane	RBM6	RNA binding motif protein 6 [Source:HGNC Symbol;Acc:9903]
ENSG00000004700	53	68	54	56	73	80	47	85	79	100	55	No.Diff.Exp	non-transmembrane	RECQL	RecQ protein-like (DNA helicase Q1-like) [Source:HGNC Symbol;Acc:9948]
ENSG00000004766	8	89	88	92	91	87	73	96	65.5	100	55	No.Diff.Exp	non-transmembrane	CCDC132	coiled-coil domain containing 132 [Source:HGNC Symbol;Acc:25956]
ENSG00000004779	35.5	63	66	58	64	82	66	86	87	100	60	No.Diff.Exp	non-transmembrane	NDUFAB1	NADH dehydrogenase (ubiquinone) 1, alpha/beta subcomplex, 1, 8kDa [Source:HGNC Symbol;Acc:7694]
ENSG00000004799	0	60	71	76	77	92	86	93	93	100	66	No.Diff.Exp	non-transmembrane	PDK4	pyruvate dehydrogenase kinase, isozyme 4 [Source:HGNC Symbol;Acc:8812]
ENSG00000004809	0	39	57	57	58	68	35	55	0	99	47	No.Diff.Exp	transmembrane	SLC22A16	solute carrier family 22 (organic cation/carnitine transporter), member 16 [Source:HGNC Symbol;Acc:20302]
ENSG00000004864	0	86	87	89	92	93	64	96	69	100	74	No.Diff.Exp	non-transmembrane	SLC25A13	solute carrier family 25 (aspartate/glutamate carrier), member 13 [Source:HGNC Symbol;Acc:10983]
ENSG00000004975	5	40	60	41	0	67	91	96	95	100	73	No.Diff.Exp	non-transmembrane	DVL2	dishevelled segment polarity protein 2 [Source:HGNC Symbol;Acc:3086]
ENSG00000005007	87	60	82	0	95	95	69	98	97	84	93	No.Diff.Exp	non-transmembrane	UPF1	UPF1 regulator of nonsense transcripts homolog (yeast) [Source:HGNC Symbol;Acc:9962]
ENSG00000005020	0	60	56	66	70	82	77	91	87	100	56	No.Diff.Exp	non-transmembrane	SKAP2	src kinase associated phosphoprotein 2 [Source:HGNC Symbol;Acc:15687]
ENSG00000005022	81	93	92	91	94	95	0	98	99	70	91	No.Diff.Exp	transmembrane	SLC25A5	solute carrier family 25 (mitochondrial carrier; adenine nucleotide translocator), member 5 [Source:HGNC Symbol;Acc:10991]
ENSG00000005100	0	75	76	72	0	63	66	93	93	99	70	No.Diff.Exp	non-transmembrane	DHX33	DEAH (Asp-Glu-Ala-His) box polypeptide 33 [Source:HGNC Symbol;Acc:16718]
ENSG00000005175	25	54	57	64	62	82	40	79	78	99	45	No.Diff.Exp	non-transmembrane	RPAP3	RNA polymerase II associated protein 3 [Source:HGNC Symbol;Acc:26151]
ENSG00000005187	0	63	64	67	64	80	66	85	84	99	63	No.Diff.Exp	non-transmembrane	ACSM3	acyl-CoA synthetase medium-chain family member 3 [Source:HGNC Symbol;Acc:10522]
ENSG00000005194	0	39	60	38	76	85	48	81	81	99	56	No.Diff.Exp	non-transmembrane	CIAPIN1	cytokine induced apoptosis inhibitor 1 [Source:HGNC Symbol;Acc:28050]
ENSG00000005238	0	34	40	42	46	93	75	91	92	99	39	No.Diff.Exp	non-transmembrane	FAM214B	family with sequence similarity 214, member B [Source:HGNC Symbol;Acc:25666]
ENSG00000005302	16	66	37.5	81	68	84	33	61.5	62	99	0	No.Diff.Exp	non-transmembrane	MSL3	male-specific lethal 3 homolog (Drosophila) [Source:HGNC Symbol;Acc:7370]
ENSG00000005339	21	79	76	74	88	94	59	96	96	98	65	No.Diff.Exp	non-transmembrane	CREBBP	CREB binding protein [Source:HGNC Symbol;Acc:2348]
ENSG00000005381	0	48	55	40	59	78	73	83	84	99	47	No.Diff.Exp	transmembrane	MPO	myeloperoxidase [Source:HGNC Symbol;Acc:7218]
ENSG00000005448	58	32	0	59	61	91	76	89	88	99	56	No.Diff.Exp	non-transmembrane	WDR54	WD repeat domain 54 [Source:HGNC Symbol;Acc:25770]
ENSG00000005469	29	61	63	65	64	77	35	82	81	100	59	No.Diff.Exp	non-transmembrane	CROT	carnitine O-octanoyltransferase [Source:HGNC Symbol;Acc:2366]
ENSG00000005471	53	58	60	69	54	67	72	90	91	100	63	No.Diff.Exp	transmembrane	ABCB4	ATP-binding cassette, sub-family B (MDR/TAP), member 4 [Source:HGNC Symbol;Acc:45]
ENSG00000005483	16	69	63	78	82	82	59	89	76	100	38	No.Diff.Exp	transmembrane	KMT2E	lysine (K)-specific methyltransferase 2E [Source:HGNC Symbol;Acc:18541]
ENSG00000005486	0	27	33	41	0	85	43	87	86	100	24	No.Diff.Exp	transmembrane	RHBDD2	rhomboid domain containing 2 [Source:HGNC Symbol;Acc:23082]
ENSG00000005513	0	72	70	70	73	49	74	84	83	80	52	hsa_Tcell	non-transmembrane	SOX8	SRY (sex determining region Y)-box 8 [Source:HGNC Symbol;Acc:11203]
ENSG00000005700	0	10	63	67	72	81	53	86	84	99	57	No.Diff.Exp	non-transmembrane	IBTK	inhibitor of Bruton agammaglobulinemia tyrosine kinase [Source:HGNC Symbol;Acc:17853]
ENSG00000005801	0	0	0	0	0	0	0	40	0	79	0	No.Diff.Exp	non-transmembrane	ZNF195	zinc finger protein 195 [Source:HGNC Symbol;Acc:12986]
ENSG00000005810	0	74	10.6667	91	87	83	70	97	93	99	80	No.Diff.Exp	non-transmembrane	MYCBP2	MYC binding protein 2, E3 ubiquitin protein ligase [Source:HGNC Symbol;Acc:23386]
ENSG00000005844	0	0	0	41	0	70	53	72	72	75	30	hsa_NK	transmembrane	ITGAL	integrin, alpha L (antigen CD11A (p180), lymphocyte function-associated antigen 1; alpha polypeptide) [Source:HGNC Symbol;Acc:6148]
ENSG00000005889	0	0	0	0	0	97	0	75.6667	83	100	0	No.Diff.Exp	non-transmembrane	ZFX	zinc finger protein, X-linked [Source:HGNC Symbol;Acc:12869]
ENSG00000005893	22	43	42	0	51	76	44	64	60	0	25	No.Diff.Exp	transmembrane	LAMP2	lysosomal-associated membrane protein 2 [Source:HGNC Symbol;Acc:6501]
ENSG00000005961	0	0	44	45	11	85	63	80	78	99	42	No.Diff.Exp	transmembrane	ITGA2B	integrin, alpha 2b (platelet glycoprotein IIb of IIb/IIIa complex, antigen CD41) [Source:HGNC Symbol;Acc:6138]
ENSG00000006007	40	50	50	62	55	87	58	87	75	100	57	No.Diff.Exp	transmembrane	GDE1	glycerophosphodiester phosphodiesterase 1 [Source:HGNC Symbol;Acc:29644]
ENSG00000006025	0	60	0	71	55	81	79	92	92	93	45	No.Diff.Exp	non-transmembrane	OSBPL7	oxysterol binding protein-like 7 [Source:HGNC Symbol;Acc:16387]
ENSG00000006125	83	94	97	0	99	100	84	100	98	100	94	No.Diff.Exp	non-transmembrane	AP2B1	adaptor-related protein complex 2, beta 1 subunit [Source:HGNC Symbol;Acc:563]
ENSG00000006194	0	0	0	0	0	74	67	83	83	99	0	No.Diff.Exp	non-transmembrane	ZNF263	zinc finger protein 263 [Source:HGNC Symbol;Acc:13056]
ENSG00000006282	27	54	52	56	58	91	70	84	85	98	56	No.Diff.Exp	transmembrane	SPATA20	spermatogenesis associated 20 [Source:HGNC Symbol;Acc:26125]
ENSG00000006432	0	55	65	74	75	91	74	92	94	98	54	No.Diff.Exp	non-transmembrane	MAP3K9	mitogen-activated protein kinase kinase kinase 9 [Source:HGNC Symbol;Acc:6861]
ENSG00000006451	64	98	98	99	99	99	98	100	100	100	94	No.Diff.Exp	non-transmembrane	RALA	v-ral simian leukemia viral oncogene homolog A (ras related) [Source:HGNC Symbol;Acc:9839]
ENSG00000006530	48	47	64	72	75	77	0	92	91	99	59	No.Diff.Exp	non-transmembrane	AGK	acylglycerol kinase [Source:HGNC Symbol;Acc:21869]
ENSG00000006534	0	36	62	51	62.5	0	75	84	85	0	53	hsa_myeloid	non-transmembrane	ALDH3B1	aldehyde dehydrogenase 3 family, member B1 [Source:HGNC Symbol;Acc:410]
ENSG00000006576	59	58	74	62	91	93	65	93	92	100	72	No.Diff.Exp	transmembrane	PHTF2	putative homeodomain transcription factor 2 [Source:HGNC Symbol;Acc:13411]
ENSG00000006625	0	48	47	56	62	82	36	82	83	100	48	No.Diff.Exp	non-transmembrane	GGCT	gamma-glutamylcyclotransferase [Source:HGNC Symbol;Acc:21705]
ENSG00000006652	41	72	65	71	80	89	56	94	93	100	60	No.Diff.Exp	non-transmembrane	IFRD1	interferon-related developmental regulator 1 [Source:HGNC Symbol;Acc:5456]
ENSG00000006695	0	63	25.5	65	67	53	62	81	80	100	59	No.Diff.Exp	transmembrane	COX10	cytochrome c oxidase assembly homolog 10 (yeast) [Source:HGNC Symbol;Acc:2260]
ENSG00000006712	34	78	68	41	74	98	65	99	98	63	51	No.Diff.Exp	non-transmembrane	PAF1	Paf1, RNA polymerase II associated factor, homolog (S. cerevisiae) [Source:HGNC Symbol;Acc:25459]
ENSG00000006715	65	77	80	89	87	97	72	97	87	100	82	No.Diff.Exp	non-transmembrane	VPS41	vacuolar protein sorting 41 homolog (S. cerevisiae) [Source:HGNC Symbol;Acc:12713]
ENSG00000006744	0	0	57	66	60	76	53	82	82	99	56	No.Diff.Exp	non-transmembrane	ELAC2	elaC ribonuclease Z 2 [Source:HGNC Symbol;Acc:14198]
ENSG00000006756	48	58	58	64	66	0	41	0	0	87	52	No.Diff.Exp	transmembrane	ARSD	arylsulfatase D [Source:HGNC Symbol;Acc:717]
ENSG00000006831	66	74	81	80	83	57	64	93	94	100	72	No.Diff.Exp	transmembrane	ADIPOR2	adiponectin receptor 2 [Source:HGNC Symbol;Acc:24041]
ENSG00000007038	0	0	22	0	0	46	37	65	64	72	32.4737	No.Diff.Exp	transmembrane	PRSS21	protease, serine, 21 (testisin) [Source:HGNC Symbol;Acc:9485]
ENSG00000007168	76	97	97	99	99	100	58	100	100	100	94	No.Diff.Exp	non-transmembrane	PAFAH1B1	platelet-activating factor acetylhydrolase 1b, regulatory subunit 1 (45kDa) [Source:HGNC Symbol;Acc:8574]
ENSG00000007202	0	64	68	76	81	57	77	94	92	89	65	No.Diff.Exp	transmembrane	KIAA0100	KIAA0100 [Source:HGNC Symbol;Acc:28960]
ENSG00000007237	52	38	0	67	81	71	60	85	85	100	53	No.Diff.Exp	non-transmembrane	GAS7	growth arrest-specific 7 [Source:HGNC Symbol;Acc:4169]
ENSG00000007255	0	54	51	0	0	59	46	76	79	47	53	No.Diff.Exp	non-transmembrane	TRAPPC6A	trafficking protein particle complex 6A [Source:HGNC Symbol;Acc:23069]
ENSG00000007264	0	62	56	0	67	83	42	85	82	71	55	No.Diff.Exp	non-transmembrane	MATK	megakaryocyte-associated tyrosine kinase [Source:HGNC Symbol;Acc:6906]
ENSG00000007312	0	0	0	0	39	71	57	68	69	99	0	hsa_Bcell	transmembrane	CD79B	CD79b molecule, immunoglobulin-associated beta [Source:HGNC Symbol;Acc:1699]
ENSG00000007350	62	53	67	67	0	72	0	70	70	95	63	No.Diff.Exp	non-transmembrane	TKTL1	transketolase-like 1 [Source:HGNC Symbol;Acc:11835]
ENSG00000007402	32.5	51	61	47	78	81	70	97	97	95	42.3333	No.Diff.Exp	non-transmembrane	CACNA2D2	calcium channel, voltage-dependent, alpha 2/delta subunit 2 [Source:HGNC Symbol;Acc:1400]
ENSG00000007520	43	59	56	54	55	80	63	77	65	87	54	No.Diff.Exp	non-transmembrane	TSR3	TSR3, 20S rRNA accumulation, homolog (S. cerevisiae) [Source:HGNC Symbol;Acc:14175]
ENSG00000007541	37	46	44	48	48	65	46	57	58	98	43	No.Diff.Exp	transmembrane	PIGQ	phosphatidylinositol glycan anchor biosynthesis, class Q [Source:HGNC Symbol;Acc:14135]
ENSG00000007545	0	0	0	66	73	78	49	84	83	72	0	No.Diff.Exp	non-transmembrane	CRAMP1L	Crm, cramped-like (Drosophila) [Source:HGNC Symbol;Acc:14122]
ENSG00000007944	14	84	82	90	92	76	59	96	96	100	70	No.Diff.Exp	non-transmembrane	MYLIP	myosin regulatory light chain interacting protein [Source:HGNC Symbol;Acc:21155]
ENSG00000007968	41	55	0	42	49	86	47	84	74	100	51	No.Diff.Exp	non-transmembrane	E2F2	E2F transcription factor 2 [Source:HGNC Symbol;Acc:3114]
ENSG00000008018	0	74	73	80	82	93	0	93	92	100	80	No.Diff.Exp	non-transmembrane	PSMB1	proteasome (prosome, macropain) subunit, beta type, 1 [Source:HGNC Symbol;Acc:9537]
ENSG00000008083	31	52	76	83	87	89	68	92	92	100	56.5	No.Diff.Exp	non-transmembrane	JARID2	jumonji, AT rich interactive domain 2 [Source:HGNC Symbol;Acc:6196]
ENSG00000008118	36	61	67	73	75	93	80	92	93	100	55	No.Diff.Exp	non-transmembrane	CAMK1G	calcium/calmodulin-dependent protein kinase IG [Source:HGNC Symbol;Acc:14585]
ENSG00000008130	19	41	60	30	63	59	52	69	69	74	29	No.Diff.Exp	non-transmembrane	NADK	NAD kinase [Source:HGNC Symbol;Acc:29831]
ENSG00000008282	39	48	49	54.5	53	86	44	81	82	100	44	No.Diff.Exp	transmembrane	SYPL1	synaptophysin-like 1 [Source:HGNC Symbol;Acc:11507]
ENSG00000008283	29	60	57	0	67	52	78	87	86	99	56	No.Diff.Exp	transmembrane	CYB561	cytochrome b561 [Source:HGNC Symbol;Acc:2571]
ENSG00000008294	0	81	66	84	88	96	64	96	96	100	67.5	No.Diff.Exp	transmembrane	SPAG9	sperm associated antigen 9 [Source:HGNC Symbol;Acc:14524]
ENSG00000008324	0	69	65	70	81	96	0	87	87	83	66	No.Diff.Exp	non-transmembrane	SS18L2	synovial sarcoma translocation gene on chromosome 18-like 2 [Source:HGNC Symbol;Acc:15593]
ENSG00000008382	0	58	59	20	56	59	0	80	80	72	53	No.Diff.Exp	non-transmembrane	MPND	MPN domain containing [Source:HGNC Symbol;Acc:25934]
ENSG00000008394	56	64	58	59	68	69	50	83	83	100	56.5	No.Diff.Exp	transmembrane	MGST1	microsomal glutathione S-transferase 1 [Source:HGNC Symbol;Acc:7061]
ENSG00000008405	75	89	89	92	92	89	76	96	95	100	80.5	No.Diff.Exp	non-transmembrane	CRY1	cryptochrome 1 (photolyase-like) [Source:HGNC Symbol;Acc:2384]
ENSG00000008438	0	40	42	0	0	65	0	65	63	91	34	No.Diff.Exp	transmembrane	PGLYRP1	peptidoglycan recognition protein 1 [Source:HGNC Symbol;Acc:8904]
ENSG00000008513	0	30	56	66	67	86	31	81	82	99	34.25	No.Diff.Exp	transmembrane	ST3GAL1	ST3 beta-galactoside alpha-2,3-sialyltransferase 1 [Source:HGNC Symbol;Acc:10862]
ENSG00000008516	0	38	44	52	0	83	70	76	0	99	42.5	No.Diff.Exp	transmembrane	MMP25	matrix metallopeptidase 25 [Source:HGNC Symbol;Acc:14246]
ENSG00000008838	64	16	76	81	86	77	80	94	94	100	76	No.Diff.Exp	non-transmembrane	MED24	mediator complex subunit 24 [Source:HGNC Symbol;Acc:22963]
ENSG00000008869	69	85	87	90	93	93	68	96	94	100	79	No.Diff.Exp	non-transmembrane	HEATR5B	HEAT repeat containing 5B [Source:HGNC Symbol;Acc:29273]
ENSG00000008952	0	82	70	87	91	98	79	93	93	100	77	No.Diff.Exp	transmembrane	SEC62	SEC62 homolog (S. cerevisiae) [Source:HGNC Symbol;Acc:11846]
ENSG00000009307	0	79	82	87	87	95	82	93	93	96	73	No.Diff.Exp	non-transmembrane	CSDE1	cold shock domain containing E1, RNA-binding [Source:HGNC Symbol;Acc:29905]
ENSG00000009335	65	78	86	89	91	92	44	93	81	100	78	No.Diff.Exp	non-transmembrane	UBE3C	ubiquitin protein ligase E3C [Source:HGNC Symbol;Acc:16803]
ENSG00000009413	10	28	58	66	70	90	62	87	85	100	46	No.Diff.Exp	non-transmembrane	REV3L	REV3-like, polymerase (DNA directed), zeta, catalytic subunit [Source:HGNC Symbol;Acc:9968]
ENSG00000009780	38.5	74	0	0	84	89	52	88	85	100	0	No.Diff.Exp	non-transmembrane	FAM76A	family with sequence similarity 76, member A [Source:HGNC Symbol;Acc:28530]
ENSG00000009790	0	40	32	16	39	69	51	66	65	99	14	No.Diff.Exp	transmembrane	TRAF3IP3	TRAF3 interacting protein 3 [Source:HGNC Symbol;Acc:30766]
ENSG00000009844	0	12	61	79	79	95	58	92	93	100	68	No.Diff.Exp	non-transmembrane	VTA1	vesicle (multivesicular body) trafficking 1 [Source:HGNC Symbol;Acc:20954]
ENSG00000009954	0	71	67	0	0	86	78	92	92	100	61	No.Diff.Exp	non-transmembrane	BAZ1B	bromodomain adjacent to zinc finger domain, 1B [Source:HGNC Symbol;Acc:961]
ENSG00000010017	0	77	62	81	79	83	46	85	83	81	67	No.Diff.Exp	non-transmembrane	RANBP9	RAN binding protein 9 [Source:HGNC Symbol;Acc:13727]
ENSG00000010072	20	44	41	49	44	69	24	71	63	100	43	No.Diff.Exp	non-transmembrane	SPRTN	SprT-like N-terminal domain [Source:HGNC Symbol;Acc:25356]
ENSG00000010165	19	66	60	64	68	88	0	90	10	100	53	No.Diff.Exp	non-transmembrane	METTL13	methyltransferase like 13 [Source:HGNC Symbol;Acc:24248]
ENSG00000010219	20.3333	56	0	35	0	0	69	77	77	98	55	No.Diff.Exp	non-transmembrane	DYRK4	dual-specificity tyrosine-(Y)-phosphorylation regulated kinase 4 [Source:HGNC Symbol;Acc:3095]
ENSG00000010244	53	78	77	54	95	92	87	99	93	100	64	No.Diff.Exp	transmembrane	ZNF207	zinc finger protein 207 [Source:HGNC Symbol;Acc:12998]
ENSG00000010270	22	75	64	85	83	97	58	95	96	100	66	No.Diff.Exp	transmembrane	STARD3NL	STARD3 N-terminal like [Source:HGNC Symbol;Acc:19169]
ENSG00000010278	0	38	71	50	72	85	62.6667	89	91	100	58.5	No.Diff.Exp	transmembrane	CD9	CD9 molecule [Source:HGNC Symbol;Acc:1709]
ENSG00000010292	0	43	56	61	62	85	74	86	86	100	49	No.Diff.Exp	non-transmembrane	NCAPD2	non-SMC condensin I complex, subunit D2 [Source:HGNC Symbol;Acc:24305]
ENSG00000010322	0	43	42	55	57	86	53	88	89	99	47	No.Diff.Exp	non-transmembrane	NISCH	nischarin [Source:HGNC Symbol;Acc:18006]
ENSG00000010404	0	64	64	58	66	80	55	86	79	0	58	No.Diff.Exp	transmembrane	IDS	iduronate 2-sulfatase [Source:HGNC Symbol;Acc:5389]
ENSG00000010539	0	0	0	0	0	87	0	0	0	99	12	No.Diff.Exp	non-transmembrane	ZNF200	zinc finger protein 200 [Source:HGNC Symbol;Acc:12993]
ENSG00000010610	0	0	0	0	26	63	0	55	54	97	0	No.Diff.Exp	transmembrane	CD4	CD4 molecule [Source:HGNC Symbol;Acc:1678]
ENSG00000010671	43	57	70	74	82	85	81	94	89	95	60	hsa_Bcell	non-transmembrane	BTK	Bruton agammaglobulinemia tyrosine kinase [Source:HGNC Symbol;Acc:1133]
ENSG00000010803	0	67	71	78	80	93	58	94	88	100	63	No.Diff.Exp	non-transmembrane	SCMH1	sex comb on midleg homolog 1 (Drosophila) [Source:HGNC Symbol;Acc:19003]
ENSG00000010810	0	93	90	99	93	100	83	99	100	100	91.5	No.Diff.Exp	non-transmembrane	FYN	FYN oncogene related to SRC, FGR, YES [Source:HGNC Symbol;Acc:4037]
ENSG00000010818	16.5	55	58	32.5	74	84	67	87	88	100	37	No.Diff.Exp	non-transmembrane	HIVEP2	human immunodeficiency virus type I enhancer binding protein 2 [Source:HGNC Symbol;Acc:4921]
ENSG00000011009	52	71	80	82	88	51	93	99	99	94	75	No.Diff.Exp	non-transmembrane	LYPLA2	lysophospholipase II [Source:HGNC Symbol;Acc:6738]
ENSG00000011021	0	86	82	67	93	91	82	97	97	92	82	No.Diff.Exp	transmembrane	CLCN6	chloride channel, voltage-sensitive 6 [Source:HGNC Symbol;Acc:2024]
ENSG00000011052	0	49	48	88	46	0	0	54	54	0	46.5	No.Diff.Exp	non-transmembrane	NME2	NME/NM23 nucleoside diphosphate kinase 2 [Source:HGNC Symbol;Acc:7850]
ENSG00000011105	0	90	93	92	81	62	86	97	97	85	79	No.Diff.Exp	transmembrane	TSPAN9	tetraspanin 9 [Source:HGNC Symbol;Acc:21640]
ENSG00000011114	18	82	83	86	82	90	73	93	95	100	68	No.Diff.Exp	non-transmembrane	BTBD7	BTB (POZ) domain containing 7 [Source:HGNC Symbol;Acc:18269]
ENSG00000011132	0	44	42	14	53	59	62	75	72	98	48	No.Diff.Exp	non-transmembrane	APBA3	amyloid beta (A4) precursor protein-binding, family A, member 3 [Source:HGNC Symbol;Acc:580]
ENSG00000011198	0	72	74	81	78	94	49.5	94	94	99	53	No.Diff.Exp	non-transmembrane	ABHD5	abhydrolase domain containing 5 [Source:HGNC Symbol;Acc:21396]
ENSG00000011275	0	55	52	69	34.5	59	55	87	86	100	43	No.Diff.Exp	non-transmembrane	RNF216	ring finger protein 216 [Source:HGNC Symbol;Acc:21698]
ENSG00000011295	38	45	42	38	49	56	0	81	79	99	42	No.Diff.Exp	non-transmembrane	TTC19	tetratricopeptide repeat domain 19 [Source:HGNC Symbol;Acc:26006]
ENSG00000011304	28	87	80	29	93	97	89	97	97	100	78.5	No.Diff.Exp	non-transmembrane	PTBP1	polypyrimidine tract binding protein 1 [Source:HGNC Symbol;Acc:9583]
ENSG00000011422	0	16	19	32	0	68	21	61	59	87	0	hsa_myeloid	transmembrane	PLAUR	plasminogen activator, urokinase receptor [Source:HGNC Symbol;Acc:9053]
ENSG00000011454	19	88	88	75	94	96	90	97	97	100	78	No.Diff.Exp	non-transmembrane	RABGAP1	RAB GTPase activating protein 1 [Source:HGNC Symbol;Acc:17155]
ENSG00000011523	2	20	20	21	22	72	29	58	59	99	19	No.Diff.Exp	non-transmembrane	CEP68	centrosomal protein 68kDa [Source:HGNC Symbol;Acc:29076]
ENSG00000011590	25	25	0	0	0	54	44	63	66	99	25	No.Diff.Exp	non-transmembrane	ZBTB32	zinc finger and BTB domain containing 32 [Source:HGNC Symbol;Acc:16763]
ENSG00000011600	0	0	0	0	0	75	60	74	72	97	0	hsa_NK	transmembrane	TYROBP	TYRO protein tyrosine kinase binding protein [Source:HGNC Symbol;Acc:12449]
ENSG00000011638	0	31	38	33	36	55	25	61	61	98	0	No.Diff.Exp	transmembrane	TMEM159	transmembrane protein 159 [Source:HGNC Symbol;Acc:30136]
ENSG00000012061	49	0	47	44.5	0	81	37	76	74	89	51	No.Diff.Exp	non-transmembrane	ERCC1	excision repair cross-complementing rodent repair deficiency, complementation group 1 (includes overlapping antisense sequence) [Source:HGNC Symbol;Acc:3433]
ENSG00000012124	0	25	21	18.5	0	60	44	60	59	97	19	hsa_Bcell	transmembrane	CD22	CD22 molecule [Source:HGNC Symbol;Acc:1643]
ENSG00000012223	42	44	43	50	50	72	30	70	61	98	37	No.Diff.Exp	transmembrane	LTF	lactotransferrin [Source:HGNC Symbol;Acc:6720]
ENSG00000012232	45.5	88	81	91	91	97	92	97	97	100	83	No.Diff.Exp	transmembrane	EXTL3	exostosin-like glycosyltransferase 3 [Source:HGNC Symbol;Acc:3518]
ENSG00000012660	55	53	71	75	77	42	44	85	85	100	64	No.Diff.Exp	transmembrane	ELOVL5	ELOVL fatty acid elongase 5 [Source:HGNC Symbol;Acc:21308]
ENSG00000012779	46	73	62	80	84	78	84	93	94	97	61	hsa_Bcell	non-transmembrane	ALOX5	arachidonate 5-lipoxygenase [Source:HGNC Symbol;Acc:435]
ENSG00000012822	20	40	33	54	0	84	61	89	89	100	28	No.Diff.Exp	non-transmembrane	CALCOCO1	calcium binding and coiled-coil domain 1 [Source:HGNC Symbol;Acc:29306]
ENSG00000012963	32	68	63	70	70	81	65	87	88	100	42	No.Diff.Exp	non-transmembrane	UBR7	ubiquitin protein ligase E3 component n-recognin 7 (putative) [Source:HGNC Symbol;Acc:20344]
ENSG00000012983	0	85	81	89	91	93	69	96	97	100	78	No.Diff.Exp	non-transmembrane	MAP4K5	mitogen-activated protein kinase kinase kinase kinase 5 [Source:HGNC Symbol;Acc:6867]
ENSG00000013275	72	63	70.5	99	0	99	83	100	100	100	97	No.Diff.Exp	non-transmembrane	PSMC4	proteasome (prosome, macropain) 26S subunit, ATPase, 4 [Source:HGNC Symbol;Acc:9551]
ENSG00000013288	15	52	60	0	26	0	46	73	73.5	0	56	No.Diff.Exp	transmembrane	MAN2B2	mannosidase, alpha, class 2B, member 2 [Source:HGNC Symbol;Acc:29623]
ENSG00000013306	49	58	55	62	63	68	68.6667	88	88	99	56	No.Diff.Exp	transmembrane	SLC25A39	solute carrier family 25, member 39 [Source:HGNC Symbol;Acc:24279]
ENSG00000013364	0	67	63	69	66	90	72	88	88	84	66	No.Diff.Exp	non-transmembrane	MVP	major vault protein [Source:HGNC Symbol;Acc:7531]
ENSG00000013374	38	45	55	62	62	75	75	83	84	94	38	No.Diff.Exp	non-transmembrane	NUB1	negative regulator of ubiquitin-like proteins 1 [Source:HGNC Symbol;Acc:17623]
ENSG00000013441	0	54	61	71	68	81	0	81	82	99	53	No.Diff.Exp	non-transmembrane	CLK1	CDC-like kinase 1 [Source:HGNC Symbol;Acc:2068]
ENSG00000013503	19	95	92	96	97	96	81	99	99	100	94	No.Diff.Exp	non-transmembrane	POLR3B	polymerase (RNA) III (DNA directed) polypeptide B [Source:HGNC Symbol;Acc:30348]
ENSG00000013523	0	41	15	59	59	91	78	91	88	99	39	No.Diff.Exp	transmembrane	ANGEL1	angel homolog 1 (Drosophila) [Source:HGNC Symbol;Acc:19961]
ENSG00000013561	55	63	56.5	71	29	72	70	91	92	100	47.8	No.Diff.Exp	non-transmembrane	RNF14	ring finger protein 14 [Source:HGNC Symbol;Acc:10058]
ENSG00000013583	30	62	56	56	67	57	0	87	87	100	26	No.Diff.Exp	non-transmembrane	HEBP1	heme binding protein 1 [Source:HGNC Symbol;Acc:17176]
ENSG00000013725	17	26	0	0	16	71	35	70	50	99	20	No.Diff.Exp	transmembrane	CD6	CD6 molecule [Source:HGNC Symbol;Acc:1691]
ENSG00000014123	0	71	66	60	75	87	53	91	91	100	63	No.Diff.Exp	non-transmembrane	UFL1	UFM1-specific ligase 1 [Source:HGNC Symbol;Acc:23039]
ENSG00000014138	10	55	65	21	22	81	54	83	84	100	57	No.Diff.Exp	non-transmembrane	POLA2	polymerase (DNA directed), alpha 2, accessory subunit [Source:HGNC Symbol;Acc:30073]
ENSG00000014216	40	65	77	85	70	90	78	89	89	99	67.5	No.Diff.Exp	non-transmembrane	CAPN1	calpain 1, (mu/I) large subunit [Source:HGNC Symbol;Acc:1476]
ENSG00000014257	0	43	0	47	52	78	40	77	78	99	0	hsa_myeloid	transmembrane	ACPP	acid phosphatase, prostate [Source:HGNC Symbol;Acc:125]
ENSG00000014824	55	71	73	74	74	94	67	89	88	100	73	No.Diff.Exp	transmembrane	SLC30A9	solute carrier family 30 (zinc transporter), member 9 [Source:HGNC Symbol;Acc:1329]
ENSG00000014914	0	34	37	0	38	76	66	85	86	100	39	No.Diff.Exp	non-transmembrane	MTMR11	myotubularin related protein 11 [Source:HGNC Symbol;Acc:24307]
ENSG00000014919	0	45	74	75	74	90	44	90	90	100	69	No.Diff.Exp	transmembrane	COX15	cytochrome c oxidase assembly homolog 15 (yeast) [Source:HGNC Symbol;Acc:2263]
ENSG00000015171	57	83	87	95	97	98	39	98	98	93	74	No.Diff.Exp	transmembrane	ZMYND11	zinc finger, MYND-type containing 11 [Source:HGNC Symbol;Acc:16966]
ENSG00000015285	23	46	45	58	0	48	39	88	84	0	46	No.Diff.Exp	non-transmembrane	WAS	Wiskott-Aldrich syndrome [Source:HGNC Symbol;Acc:12731]
ENSG00000015475	0	0	23	29	31	35	0	51	49	100	0	No.Diff.Exp	non-transmembrane	BID	BH3 interacting domain death agonist [Source:HGNC Symbol;Acc:1050]
ENSG00000015532	0	68	64	75	78	90	83	94	94	96	62	No.Diff.Exp	transmembrane	XYLT2	xylosyltransferase II [Source:HGNC Symbol;Acc:15517]
ENSG00000015676	57	60	41	68	71	86	32	87	36	99	54	No.Diff.Exp	non-transmembrane	NUDCD3	NudC domain containing 3 [Source:HGNC Symbol;Acc:22208]
ENSG00000016864	44	65	0	71	76	95	63	91	90	100	60	No.Diff.Exp	transmembrane	GLT8D1	glycosyltransferase 8 domain containing 1 [Source:HGNC Symbol;Acc:24870]
ENSG00000017797	68	85	86	90	81	76	64	92	87.6667	100	76	No.Diff.Exp	non-transmembrane	RALBP1	ralA binding protein 1 [Source:HGNC Symbol;Acc:9841]
ENSG00000018280	0	65	63	67	67	87	59	87	80	99	0	hsa_myeloid	transmembrane	SLC11A1	solute carrier family 11 (proton-coupled divalent metal ion transporter), member 1 [Source:HGNC Symbol;Acc:10907]
ENSG00000018699	55	70	60	72	74	70	53	85	86	93	59	No.Diff.Exp	non-transmembrane	TTC27	tetratricopeptide repeat domain 27 [Source:HGNC Symbol;Acc:25986]
ENSG00000019169	26	27	10	31	36	48	23	64	61	98	29	No.Diff.Exp	transmembrane	MARCO	macrophage receptor with collagenous structure [Source:HGNC Symbol;Acc:6895]
ENSG00000019582	0	34	31	36	43	77	48	73	73	78	23	hsa_Bcell	transmembrane	CD74	CD74 molecule, major histocompatibility complex, class II invariant chain [Source:HGNC Symbol;Acc:1697]
ENSG00000019995	0	93	89	96	96	99	96	99	99	100	76	No.Diff.Exp	non-transmembrane	ZRANB1	zinc finger, RAN-binding domain containing 1 [Source:HGNC Symbol;Acc:18224]
ENSG00000020426	44	83	61	87	84	98	0	95	96	100	75	No.Diff.Exp	non-transmembrane	MNAT1	MNAT CDK-activating kinase assembly factor 1 [Source:HGNC Symbol;Acc:7181]
ENSG00000020577	0	83	59	85	86	97	89	95	94	100	67	No.Diff.Exp	non-transmembrane	SAMD4A	sterile alpha motif domain containing 4A [Source:HGNC Symbol;Acc:23023]
ENSG00000020633	0	34	72	59	82	95	76	91	86	100	66	hsa_NK	non-transmembrane	RUNX3	runt-related transcription factor 3 [Source:HGNC Symbol;Acc:10473]
ENSG00000021300	0	14	0	0	50	89	32	94	85	99	34	hsa_Tcell	non-transmembrane	PLEKHB1	pleckstrin homology domain containing, family B (evectins) member 1 [Source:HGNC Symbol;Acc:19079]
ENSG00000021355	48.3333	60	62	59.3333	69	79	50	76.3333	74	99	54	No.Diff.Exp	non-transmembrane	SERPINB1	serpin peptidase inhibitor, clade B (ovalbumin), member 1 [Source:HGNC Symbol;Acc:3311]
ENSG00000021574	51	60	73	72	75	90	47	92	88	100	61	No.Diff.Exp	transmembrane	SPAST	spastin [Source:HGNC Symbol;Acc:11233]
ENSG00000021762	52	66	0	68	71	56	67	85	85	0	59	hsa_NK	non-transmembrane	OSBPL5	oxysterol binding protein-like 5 [Source:HGNC Symbol;Acc:16392]
ENSG00000021776	30	82	78	85	86	96	61	95	95	100	75	No.Diff.Exp	non-transmembrane	AQR	aquarius intron-binding spliceosomal factor [Source:HGNC Symbol;Acc:29513]
ENSG00000022267	0	44	60	57	54	98	54	96	96	0	48.5	No.Diff.Exp	transmembrane	FHL1	four and a half LIM domains 1 [Source:HGNC Symbol;Acc:3702]
ENSG00000022277	49	51	60	43	62	83	71	80	80	90	52	No.Diff.Exp	non-transmembrane	RTFDC1	replication termination factor 2 domain containing 1 [Source:HGNC Symbol;Acc:15890]
ENSG00000022567	0	57	62	73	73	65	58	81	81	86	49	No.Diff.Exp	transmembrane	SLC45A4	solute carrier family 45, member 4 [Source:HGNC Symbol;Acc:29196]
ENSG00000022840	34	64	59	69	72	86	52	92	92	100	57	No.Diff.Exp	non-transmembrane	RNF10	ring finger protein 10 [Source:HGNC Symbol;Acc:10055]
ENSG00000023041	61	80	76	82	64	80	0	93	92	100	74	No.Diff.Exp	transmembrane	ZDHHC6	zinc finger, DHHC-type containing 6 [Source:HGNC Symbol;Acc:19160]
ENSG00000023287	38	33.5	67	73	80	85	0	89	89	100	61	No.Diff.Exp	non-transmembrane	RB1CC1	RB1-inducible coiled-coil 1 [Source:HGNC Symbol;Acc:15574]
ENSG00000023318	0	73	66	81	83	96	59	93	93	100	78	No.Diff.Exp	transmembrane	ERP44	endoplasmic reticulum protein 44 [Source:HGNC Symbol;Acc:18311]
ENSG00000023445	0	60	57	67	70	86	61.5	74	74	99	55	hsa_Bcell	non-transmembrane	BIRC3	baculoviral IAP repeat containing 3 [Source:HGNC Symbol;Acc:591]
ENSG00000023516	0	41	42	48	51	82	0	73	73	99	38	No.Diff.Exp	non-transmembrane	AKAP11	A kinase (PRKA) anchor protein 11 [Source:HGNC Symbol;Acc:369]
ENSG00000023697	79	80	28	59	75	94	67	92	92	99	74	No.Diff.Exp	non-transmembrane	DERA	deoxyribose-phosphate aldolase (putative) [Source:HGNC Symbol;Acc:24269]
ENSG00000023734	72	82	72	86	87	97	0	97	85.5	100	76	No.Diff.Exp	transmembrane	STRAP	serine/threonine kinase receptor associated protein [Source:HGNC Symbol;Acc:30796]
ENSG00000023892	41	71	60	72	73	92	61	92	92	100	59.5	No.Diff.Exp	non-transmembrane	DEF6	differentially expressed in FDCP 6 homolog (mouse) [Source:HGNC Symbol;Acc:2760]
ENSG00000023902	0	58	67	18	68	84	59	90	88	100	50	No.Diff.Exp	non-transmembrane	PLEKHO1	pleckstrin homology domain containing, family O member 1 [Source:HGNC Symbol;Acc:24310]
ENSG00000023909	49	70	71	78	78	89	54	96	96	100	62	No.Diff.Exp	non-transmembrane	GCLM	glutamate-cysteine ligase, modifier subunit [Source:HGNC Symbol;Acc:4312]
ENSG00000024862	27	47	53	56	57	50	69	63	61	99	43	No.Diff.Exp	non-transmembrane	CCDC28A	coiled-coil domain containing 28A [Source:HGNC Symbol;Acc:21098]
ENSG00000025039	0	86	86	90	84	97	87	95	94	100	0	hsa_myeloid	non-transmembrane	RRAGD	Ras-related GTP binding D [Source:HGNC Symbol;Acc:19903]
ENSG00000025156	18	61	62	72	78	87	49	91	91	95	51	No.Diff.Exp	non-transmembrane	HSF2	heat shock transcription factor 2 [Source:HGNC Symbol;Acc:5225]
ENSG00000025293	3	52	57	63	65	91	72	89	88	100	38	No.Diff.Exp	non-transmembrane	PHF20	PHD finger protein 20 [Source:HGNC Symbol;Acc:16098]
ENSG00000025434	0	57	0	68	69	89	59	89	89	85	65	No.Diff.Exp	non-transmembrane	NR1H3	nuclear receptor subfamily 1, group H, member 3 [Source:HGNC Symbol;Acc:7966]
ENSG00000025772	0	59	0	62	58	64	48	88	88	100	52	No.Diff.Exp	non-transmembrane	TOMM34	translocase of outer mitochondrial membrane 34 [Source:HGNC Symbol;Acc:15746]
ENSG00000025796	0	77	76	92	91	94	67	96	96	100	71	No.Diff.Exp	transmembrane	SEC63	SEC63 homolog (S. cerevisiae) [Source:HGNC Symbol;Acc:21082]
ENSG00000025800	29	84	90	92	94	99	72	99	99	100	89	No.Diff.Exp	non-transmembrane	KPNA6	karyopherin alpha 6 (importin alpha 7) [Source:HGNC Symbol;Acc:6399]
ENSG00000026103	0	25	28	32	31	56	0	48	47	97	21	No.Diff.Exp	transmembrane	FAS	Fas cell surface death receptor [Source:HGNC Symbol;Acc:11920]
ENSG00000026297	34	43	47	48	54	65	43	67	66	99	40	No.Diff.Exp	transmembrane	RNASET2	ribonuclease T2 [Source:HGNC Symbol;Acc:21686]
ENSG00000026508	6	15	19	21	23	76	33	70	71	99	12	No.Diff.Exp	transmembrane	CD44	CD44 molecule (Indian blood group) [Source:HGNC Symbol;Acc:1681]
ENSG00000026559	0	73	76	77	79	95	64	93	93	100	33	hsa_Bcell	transmembrane	KCNG1	potassium voltage-gated channel, subfamily G, member 1 [Source:HGNC Symbol;Acc:6248]
ENSG00000026652	59	75	75	76	78	92	60	86	86	74	68	No.Diff.Exp	transmembrane	AGPAT4	1-acylglycerol-3-phosphate O-acyltransferase 4 [Source:HGNC Symbol;Acc:20885]
ENSG00000026751	0	0	0	0	0	37	0	49	42	97	0	No.Diff.Exp	transmembrane	SLAMF7	SLAM family member 7 [Source:HGNC Symbol;Acc:21394]
ENSG00000026950	0	16.3636	15.1	35	15.6	44	0	0	0	0	17.3333	No.Diff.Exp	transmembrane	BTN3A1	butyrophilin, subfamily 3, member A1 [Source:HGNC Symbol;Acc:1138]
ENSG00000027075	0	69	76	73	86	90	83	98	97	100	63.5	No.Diff.Exp	non-transmembrane	PRKCH	protein kinase C, eta [Source:HGNC Symbol;Acc:9403]
ENSG00000027847	0	69	73	75	65	86	46	92	93	76	65	No.Diff.Exp	transmembrane	B4GALT7	xylosylprotein beta 1,4-galactosyltransferase, polypeptide 7 [Source:HGNC Symbol;Acc:930]
ENSG00000027869	14	0	0	0	24	74	14	57	56	96	21	No.Diff.Exp	non-transmembrane	SH2D2A	SH2 domain containing 2A [Source:HGNC Symbol;Acc:10821]
ENSG00000028116	0	48	37	35	51	73	39	69	69	100	46	No.Diff.Exp	transmembrane	VRK2	vaccinia related kinase 2 [Source:HGNC Symbol;Acc:12719]
ENSG00000028137	0	22	0	0	19	59	22	63	62	94	22	No.Diff.Exp	transmembrane	TNFRSF1B	tumor necrosis factor receptor superfamily, member 1B [Source:HGNC Symbol;Acc:11917]
ENSG00000028203	16	58	57	0	67	87	50	84	82	100	44	No.Diff.Exp	transmembrane	VEZT	vezatin, adherens junctions transmembrane protein [Source:HGNC Symbol;Acc:18258]
ENSG00000028277	35	67	59	68	0	85	92	93	98	97	60.5	hsa_Bcell	non-transmembrane	POU2F2	POU class 2 homeobox 2 [Source:HGNC Symbol;Acc:9213]
ENSG00000028310	0	80	70	85	86	68	65	92	92	76	71	No.Diff.Exp	non-transmembrane	BRD9	bromodomain containing 9 [Source:HGNC Symbol;Acc:25818]
ENSG00000028839	75	45	92	97	96	88	84	100	100	100	78	No.Diff.Exp	non-transmembrane	TBPL1	TBP-like 1 [Source:HGNC Symbol;Acc:11589]
ENSG00000029363	14	67	53	85	91	98	82	96	84	100	0	No.Diff.Exp	non-transmembrane	BCLAF1	BCL2-associated transcription factor 1 [Source:HGNC Symbol;Acc:16863]
ENSG00000029725	15	80	77	82	88	94	64	96	95	100	69	No.Diff.Exp	non-transmembrane	RABEP1	rabaptin, RAB GTPase binding effector protein 1 [Source:HGNC Symbol;Acc:17677]
ENSG00000030066	5	60	59	70	44	81	67	91	78	99	50	No.Diff.Exp	non-transmembrane	NUP160	nucleoporin 160kDa [Source:HGNC Symbol;Acc:18017]
ENSG00000030110	18	51	0	58	0	90	51	76	75	100	0	No.Diff.Exp	transmembrane	BAK1	BCL2-antagonist/killer 1 [Source:HGNC Symbol;Acc:949]
[truncated: 6,796 more rows]

## Sheet: Mouse
Gene ID \ Species	pmarinus	lchalumnae	xtropicalis	acarolinensis	ggallus	ttruncatus	meugenii	rnorvegicus	ptroglodytes	hsapiens	drerio	Differential Expression	Transmembrane Domain	Gene Name	Description
[truncated: 9,743 more rows]
