# Supplementary material for: Single-cell transcriptome analysis of fish immune cells provides insight into the evolution of vertebrate immune cell types
Source: Genome Res. 2017 Mar;27(3):451–61. doi: 10.1101/gr.207704.116 (PMC5340972; doi:10.1101/gr.207704.116)
Supplement: Supplemental Material [file supp_gr.207704.116_Supplemental_Table_S5.xlsx]

## Sheet: Zebrafish
NK-like		T-cell		Myeloid-like
Gene ID	Gene Name	Gene ID	Gene Name	Gene ID	Gene Name
ENSDARG00000058673	nkl.2	ENSDARG00000044561	ccr7	ENSDARG00000090730	zgc:158446
ENSDARG00000041923	ccl38.6	ENSDARG00000062510	bcl11ba	ENSDARG00000051993	si:dkey-9i23.4
ENSDARG00000057714	cmah	ENSDARG00000023369	mxd	ENSDARG00000089202	nkl.3
ENSDARG00000000460	nitr2b	ENSDARG00000092903	C18H15orf48	ENSDARG00000000767	spi1b
ENSDARG00000098656	CT574575.1	ENSDARG00000044797	cd8a	ENSDARG00000063613	ENDOD1 (2 of 11)
ENSDARG00000055986	si:ch211-165b19.5	ENSDARG00000051975	cd99	ENSDARG00000043257	ckbb
ENSDARG00000103276	fcer1g	ENSDARG00000069978	si:ch211-67e16.2	ENSDARG00000103466	ccl35.1
ENSDARG00000079387	si:ch211-102c2.4	ENSDARG00000078042	il10rb	ENSDARG00000104077	fcer1gl
ENSDARG00000043398	nitr2a	ENSDARG00000095070	cd28	ENSDARG00000009336	aif1l
ENSDARG00000069848	nitr1k	ENSDARG00000010556		ENSDARG00000044345	cyfip1
ENSDARG00000061794	jam3b	ENSDARG00000056481	vat1	ENSDARG00000088762	si:ch211-224l10.4
ENSDARG00000078451	si:ch211-165b19.4	ENSDARG00000054548	si:ch73-285p12.4	ENSDARG00000002956	si:dkey-32n7.4
ENSDARG00000056438	her9	ENSDARG00000098787	si:dkey-10p5.7	ENSDARG00000033950	lamb2l
ENSDARG00000101767	si:dkey-183i3.6	ENSDARG00000055186	ccr9a	ENSDARG00000062823	pi4kab
ENSDARG00000091993	dicp1.1	ENSDARG00000010032	cmtm7	ENSDARG00000037373	ephb2a
ENSDARG00000093235	MPST	ENSDARG00000058682	si:dkey-184p9.9	ENSDARG00000076586	csf2rb
ENSDARG00000103049	CR392341.1	ENSDARG00000062081	tbc1d1	ENSDARG00000078604	tbc1d10b
ENSDARG00000000906	skap2	ENSDARG00000042533	gstm.1	ENSDARG00000055283	id2a
ENSDARG00000041835	ccl38a.5	ENSDARG00000014591	ilf2	ENSDARG00000089327	CRTAM
ENSDARG00000068374	si:ch211-132b12.7	ENSDARG00000057633	cxcr4a	ENSDARG00000029474	camk1b
ENSDARG00000075673	arhgap21b	ENSDARG00000078193	si:ch211-67e16.3	ENSDARG00000089767	rnf130
ENSDARG00000067977	nitr7b	ENSDARG00000069422	nhp2	ENSDARG00000099690	vaspa
ENSDARG00000088631	TRERF1	ENSDARG00000099635	akap8l	ENSDARG00000068214	ccni
ENSDARG00000023724	cdc42se1	ENSDARG00000044083	peli1b	ENSDARG00000092310	si:ch211-199g17.2
ENSDARG00000021366	fbp1a	ENSDARG00000070261	crlf3	ENSDARG00000074758	csde1
ENSDARG00000061473	tbkbp1	ENSDARG00000075014	sqstm1	ENSDARG00000022280	brd2a
ENSDARG00000078217	cblc	ENSDARG00000089413	mbpb	ENSDARG00000069111	IKZF2
ENSDARG00000078973	uckl1b	ENSDARG00000011740	u2af2b	ENSDARG00000104918	si:ch211-196f19.1
ENSDARG00000061796	rasgrp4	ENSDARG00000078308	spry2	ENSDARG00000009087	cd74a
ENSDARG00000075164	si:dkey-194j22.6	ENSDARG00000043781	PSMB10	ENSDARG00000094235	or115-14
ENSDARG00000075437	shc1	ENSDARG00000104227	nop10	ENSDARG00000101320	si:dkey-50i6.5
ENSDARG00000099674	dicp3.1	ENSDARG00000000656	psmb9a	ENSDARG00000006260	tuba8l4
ENSDARG00000101633	CABZ01050166.1	ENSDARG00000004830	flot2a	ENSDARG00000009782	myh11a
ENSDARG00000005551	hnrnph1l	ENSDARG00000058232	fbrsl1	ENSDARG00000036637	arl11
ENSDARG00000055759	efhd2	ENSDARG00000101009	cited4b	ENSDARG00000075853	sh3kbp1
ENSDARG00000076274	BX088529.1	ENSDARG00000016173	cct3	ENSDARG00000094673	rhoab
ENSDARG00000098913	faslg	ENSDARG00000044601	rtn4a	ENSDARG00000004301	rhogb
ENSDARG00000023532	pinx1	ENSDARG00000091951	NUGGC (3 of 4)	ENSDARG00000006683	arhgef6
ENSDARG00000042837	atp1b3b	ENSDARG00000013892	sorl1	ENSDARG00000045768	cry1aa
ENSDARG00000060766	PXN (1 of 2)	ENSDARG00000043447	gpr55a	ENSDARG00000058302	sh3bgrl
ENSDARG00000021444	prf1.2	ENSDARG00000098627	gspt1l	ENSDARG00000100651	PDCL3
ENSDARG00000024314	herpud1	ENSDARG00000099241	ppp2cb	ENSDARG00000033738	zgc:153867
ENSDARG00000027222	adgrg1	ENSDARG00000105023	selplg	ENSDARG00000074846	ARHGAP30
ENSDARG00000091003	il34	ENSDARG00000008884	hprt1	ENSDARG00000089043	ptpn6
ENSDARG00000095939	si:ch73-226l13.2	ENSDARG00000038672	tcf7	ENSDARG00000105287	mpp1
ENSDARG00000030938	fermt3b	ENSDARG00000040432	klf2b	ENSDARG00000012729	hcls1
ENSDARG00000054807	sec13	ENSDARG00000058666	dennd2da	ENSDARG00000008867	rap1b
ENSDARG00000059680	fscn1a	ENSDARG00000071001	NUGGC (2 of 4)	ENSDARG00000031317	ppdpfb
ENSDARG00000060471	gcnt3	ENSDARG00000003681	eif5	ENSDARG00000054823	id3
ENSDARG00000102912	gpr184	ENSDARG00000028748	tm9sf3	ENSDARG00000077069	srgn
ENSDARG00000012656	atf6	ENSDARG00000034173	prkcq	ENSDARG00000056090	capza1b
ENSDARG00000029431	PRR5L	ENSDARG00000036942	gpd1c	ENSDARG00000001244	srrm1
ENSDARG00000100374	txnrd1	ENSDARG00000053129	carhsp1	ENSDARG00000041140	ddb2
ENSDARG00000101860	CABZ01034528.1	ENSDARG00000103716	si:busm1-48c11.3	ENSDARG00000101527	IL1R2 (2 of 2)
ENSDARG00000103984	cyth4b	ENSDARG00000104118	antxr2a	ENSDARG00000102439	znf1149
ENSDARG00000019845	pdlim1	ENSDARG00000014181	foxp1b	ENSDARG00000016774	plekho2
ENSDARG00000024116	vamp8	ENSDARG00000076836	gpx4b	ENSDARG00000036628	cd74b
ENSDARG00000035608	pgam5	ENSDARG00000077353	rerea	ENSDARG00000103725	znf341
ENSDARG00000032606	sept8a	ENSDARG00000105293	srsf4	ENSDARG00000101785	LAPTM5
ENSDARG00000041060	zgc:92326	ENSDARG00000006225	ddx39aa	ENSDARG00000005841	tnni2a.2
ENSDARG00000054389	rhof	ENSDARG00000031343	rab6bb	ENSDARG00000008186	syk
ENSDARG00000005414	grapa	ENSDARG00000060626	dgkaa	ENSDARG00000054096	rbm41
ENSDARG00000021982	sh3bp2	ENSDARG00000061759	kdm6a	ENSDARG00000054447	SLC29A1 (1 of 2)
ENSDARG00000070165	tnfrsf1b	ENSDARG00000070686	cdipt	ENSDARG00000058964	themis2
ENSDARG00000018559	kdm7ab	ENSDARG00000071414	C12H17orf62	ENSDARG00000058551	popdc3
ENSDARG00000056966	nek7	ENSDARG00000002293	si:ch211-197g15.9	ENSDARG00000058647	hck
ENSDARG00000069958	sh2b3	ENSDARG00000016156	fam53b	ENSDARG00000059634	thumpd3
ENSDARG00000071261	BX248496.1	ENSDARG00000056206	camk2g2	ENSDARG00000087473	dnajb12b
ENSDARG00000097065	si:ch73-223p23.2	ENSDARG00000058328	lsm7	ENSDARG00000098574	srsf11
ENSDARG00000098108	dusp2	ENSDARG00000058839	SUSD1 (1 of 2)	ENSDARG00000103462	DVL3 (2 of 2)
ENSDARG00000033963	nitr1j_2	ENSDARG00000008310	ip6k2a	ENSDARG00000051886	ankrd11
ENSDARG00000075560	kmt2cb	ENSDARG00000021163	thrb	ENSDARG00000071173	slc12a10.2
ENSDARG00000078056	RNF208	ENSDARG00000060016	nsd1a	ENSDARG00000089230	ZNF707 (2 of 2)
ENSDARG00000032155	ppm1aa	ENSDARG00000022303	higd1a	ENSDARG00000089477	si:ch211-132g1.3
ENSDARG00000038967	cul3a	ENSDARG00000026519	ralgps2	ENSDARG00000097589	zgc:174574
ENSDARG00000040822	fundc1	ENSDARG00000032175	puf60a	ENSDARG00000017235	eif5a
ENSDARG00000074362		ENSDARG00000035596	ISCU (2 of 2)	ENSDARG00000019128	tpm4b
ENSDARG00000095272	si:ch211-10p21.1	ENSDARG00000044457	gfi1ab	ENSDARG00000020581	otofb
ENSDARG00000099216	atp8b2	ENSDARG00000044625	pcf11	ENSDARG00000020693	sesn1
ENSDARG00000010169	myd88	ENSDARG00000075963	mhc1uba	ENSDARG00000058128	msna
ENSDARG00000025903	lgals9l1	ENSDARG00000077264	wdr43	ENSDARG00000086418	si:ch211-236p5.3
ENSDARG00000033596	polr2c	ENSDARG00000092106	si:ch211-214p13.8	ENSDARG00000060298	nin
ENSDARG00000041724	glipr2	ENSDARG00000098391	psmg3	ENSDARG00000070843	ARID3A
ENSDARG00000086309	erlec1	ENSDARG00000025858	GOLM1	ENSDARG00000074854	sh2d1ab
ENSDARG00000101814	lpar3	ENSDARG00000052304	uqcrc1	ENSDARG00000097617	si:ch211-178n15.1
ENSDARG00000003127	zgc:123105	ENSDARG00000054539	LRP10	ENSDARG00000063108	CABZ01059392.1
ENSDARG00000037556	st3gal5	ENSDARG00000055080	rbm4.2	ENSDARG00000076247	dlk2
ENSDARG00000061048	ranbp9	ENSDARG00000056639	rltpr	ENSDARG00000101512	tmx4
ENSDARG00000090767	si:ch211-136m16.8	ENSDARG00000079133	si:dkey-10c21.1	ENSDARG00000062801	erfl3
ENSDARG00000015576	itprip	ENSDARG00000097691	si:zfos-332c3.1	ENSDARG00000018296	rev1
ENSDARG00000057854	sap18	ENSDARG00000099214	h2afvb	ENSDARG00000026829	cotl1
ENSDARG00000054777	C8H5orf51	ENSDARG00000054804	anp32e	ENSDARG00000070100	RIN1 (1 of 2)
ENSDARG00000055075	svila	ENSDARG00000062349	arhgap15	ENSDARG00000079659	wdr53
ENSDARG00000098766	pcxa	ENSDARG00000010481	bzw1a	ENSDARG00000100633	APH1A
ENSDARG00000004378	yrk	ENSDARG00000031108	lrba	ENSDARG00000011208	COX5B (1 of 3)
ENSDARG00000040620	psmg1	ENSDARG00000038056	fgfbp2b	ENSDARG00000101754	BX664622.3
ENSDARG00000068641	taf10	ENSDARG00000056803	ap1s1	ENSDARG00000031745	zgc:103599
ENSDARG00000078014	pacsin2	ENSDARG00000026680	slc25a14	ENSDARG00000098387	tmem176l.3a
ENSDARG00000091418	snx17	ENSDARG00000009106	serinc1	ENSDARG00000099781	agrp2
ENSDARG00000007294	aco2	ENSDARG00000029621	sgms1	ENSDARG00000101169	grap2b

## Sheet: Human
NK		T-cell		B-cell		Myeloid
Gene ID	Gene Name	Gene ID	Gene Name	Gene ID	Gene Name	Gene ID	Gene Name
ENSG00000115523	GNLY	ENSG00000138795	LEF1	ENSG00000132465	IGJ	ENSG00000186205	MARC1
ENSG00000180644	PRF1	ENSG00000163519	TRAT1	ENSG00000132185	FCRLA	ENSG00000136689	IL1RN
ENSG00000137441	FGFBP2	ENSG00000163600	ICOS	ENSG00000105369	CD79A	ENSG00000146592	CREB5
ENSG00000105374	NKG7	ENSG00000110448	CD5	ENSG00000128218	VPREB3	ENSG00000184221	OLIG1
ENSG00000205336	GPR56	ENSG00000172005	MAL	ENSG00000100721	TCL1A	ENSG00000135636	DYSF
ENSG00000100450	GZMH	ENSG00000174807	CD248	ENSG00000250264	TAP2	ENSG00000142405	NLRP12
ENSG00000100385	IL2RB	ENSG00000172673	THEMIS	ENSG00000007312	CD79B	ENSG00000110203	FOLR3
ENSG00000243772	KIR2DL3	ENSG00000168824	NSG1	ENSG00000153064	BANK1	ENSG00000185215	TNFAIP2
ENSG00000100453	GZMB	ENSG00000198851	CD3E	ENSG00000144645	OSBPL10	ENSG00000101916	TLR8
ENSG00000134539	KLRD1	ENSG00000111863	ADTRP	ENSG00000136573	BLK	ENSG00000250510	GPR162
ENSG00000169583	CLIC3	ENSG00000146904	EPHA1	ENSG00000174469	CNTNAP2	ENSG00000018280	SLC11A1
ENSG00000077984	CST7	ENSG00000127585	FBXL16	ENSG00000104921	FCER2	ENSG00000085514	PILRA
ENSG00000198574	SH2D1B	ENSG00000089012	SIRPG	ENSG00000082438	COBLL1	ENSG00000162444	RBP7
ENSG00000172543	CTSW	ENSG00000116983	HPCAL4	ENSG00000160683	CXCR5	ENSG00000103196	CRISPLD2
ENSG00000117281	CD160	ENSG00000197635	DPP4	ENSG00000106537	TSPAN13	ENSG00000160883	HK3
ENSG00000150045	KLRF1	ENSG00000154229	PRKCA	ENSG00000196735	HLA-DQA1	ENSG00000170909	OSCAR
ENSG00000271503	CCL5	ENSG00000168646	AXIN2	ENSG00000110777	POU2AF1	ENSG00000011422	PLAUR
ENSG00000255819	KLRC4-KLRK1	ENSG00000165272	AQP3	ENSG00000204252	HLA-DOA	ENSG00000172243	CLEC7A
ENSG00000125498	KIR2DL1	ENSG00000136111	TBC1D4	ENSG00000174123	TLR10	ENSG00000181444	ZNF467
ENSG00000115738	ID2	ENSG00000102245	CD40LG	ENSG00000269404	SPIB	ENSG00000169403	PTAFR
ENSG00000115607	IL18RAP	ENSG00000182463	TSHZ2	ENSG00000095585	BLNK	ENSG00000125538	IL1B
ENSG00000171476	HOPX	ENSG00000163599	CTLA4	ENSG00000119866	BCL11A	ENSG00000101307	SIRPB1
ENSG00000167633	KIR3DL1	ENSG00000120915	EPHX2	ENSG00000164649	CDCA7L	ENSG00000124731	TREM1
ENSG00000189013	KIR2DL4	ENSG00000111728	ST8SIA1	ENSG00000204287	HLA-DRA	ENSG00000112299	VNN1
ENSG00000166289	PLEKHF1	ENSG00000131634	TMEM204	ENSG00000140968	IRF8	ENSG00000093134	VNN3
ENSG00000156475	PPP2R2B	ENSG00000215788	TNFRSF25	ENSG00000240505	TNFRSF13B	ENSG00000114268	PFKFB4
ENSG00000135077	HAVCR2	ENSG00000117643	MAN1C1	ENSG00000163534	FCRL1	ENSG00000123700	KCNJ2
ENSG00000150687	PRSS23	ENSG00000148468	FAM171A1	ENSG00000164330	EBF1	ENSG00000073756	PTGS2
ENSG00000126264	HCST	ENSG00000152495	CAMK4	ENSG00000133789	SWAP70	ENSG00000166527	CLEC4D
ENSG00000168329	CX3CR1	ENSG00000154814	OXNAD1	ENSG00000152689	RASGRP3	ENSG00000172322	CLEC12A
ENSG00000011600	TYROBP	ENSG00000172116	CD8B	ENSG00000112799	LY86	ENSG00000196562	SULF2
ENSG00000163564	PYHIN1	ENSG00000174946	GPR171	ENSG00000176533	GNG7	ENSG00000116729	WLS
ENSG00000185885	IFITM1	ENSG00000151929	BAG3	ENSG00000065923	SLC9A7	ENSG00000103313	MEFV
ENSG00000020633	RUNX3	ENSG00000171224	C10orf35	ENSG00000196628	TCF4	ENSG00000183019	C19orf59
ENSG00000104490	NCALD	ENSG00000114737	CISH	ENSG00000231389	HLA-DPA1	ENSG00000105835	NAMPT
ENSG00000126822	PLEKHG3	ENSG00000261150	EPPK1	ENSG00000204257	HLA-DMA	ENSG00000111321	LTBR
ENSG00000181104	F2R	ENSG00000156510	HKDC1	ENSG00000048462	TNFRSF17	ENSG00000138678	AGPAT9
ENSG00000204475	NCR3	ENSG00000081059	TCF7	ENSG00000091490	SEL1L3	ENSG00000006534	ALDH3B1
ENSG00000133321	RARRES3	ENSG00000101842	VSIG1	ENSG00000242574	HLA-DMB	ENSG00000164251	F2RL1
ENSG00000142634	EFHD2	ENSG00000101230	ISM1	ENSG00000081189	MEF2C	ENSG00000136869	TLR4
ENSG00000088179	PTPN4	ENSG00000005513	SOX8	ENSG00000168081	PNOC	ENSG00000175489	LRRC25
ENSG00000158050	DUSP2	ENSG00000189283	FHIT	ENSG00000175857	GAPT	ENSG00000123405	NFE2
ENSG00000036448	MYOM2	ENSG00000135960	EDAR	ENSG00000135074	ADAM19	ENSG00000135929	CYP27A1
ENSG00000167851	CD300A	ENSG00000153250	RBMS1	ENSG00000010671	BTK	ENSG00000137331	IER3
ENSG00000074966	TXK	ENSG00000182568	SATB1	ENSG00000035720	STAP1	ENSG00000198223	CSF2RA
ENSG00000148175	STOM	ENSG00000135426	TESPA1	ENSG00000019582	CD74	ENSG00000151726	ACSL1
ENSG00000141293	SKAP1	ENSG00000144152	FBLN7	ENSG00000140391	TSPAN3	ENSG00000105520	DKFZP761J1410
ENSG00000135362	PRR5L	ENSG00000114812	VIPR1	ENSG00000162894	FAIM3	ENSG00000109743	BST1
ENSG00000134545	KLRC1	ENSG00000182230	FAM153B	ENSG00000176788	BASP1	ENSG00000173110	HSPA6
ENSG00000021762	OSBPL5	ENSG00000102760	RGCC	ENSG00000163568	AIM2	ENSG00000186074	CD300LF
ENSG00000149557	FEZ1	ENSG00000140743	CDR2	ENSG00000162144	CYB561A3	ENSG00000268500	SIGLEC5
ENSG00000122862	SRGN	ENSG00000142235	LMTK3	ENSG00000139174	PRICKLE1	ENSG00000103381	CPPED1
ENSG00000235162	C12orf75	ENSG00000112394	SLC16A10	ENSG00000077238	IL4R	ENSG00000135838	NPL
ENSG00000067840	PDZD4	ENSG00000157978	LDLRAP1	ENSG00000170456	DENND5B	ENSG00000120594	PLXDC2
ENSG00000133574	GIMAP4	ENSG00000140092	FBLN5	ENSG00000147535	PPAPDC1B	ENSG00000134072	CAMK1
ENSG00000183734	ASCL2	ENSG00000107485	GATA3	ENSG00000107438	PDLIM1	ENSG00000014257	ACPP
ENSG00000128294	TPST2	ENSG00000178562	CD28	ENSG00000109436	TBC1D9	ENSG00000125505	MBOAT7
ENSG00000176083	ZNF683	ENSG00000140511	HAPLN3	ENSG00000060138	YBX3	ENSG00000121552	CSTA
ENSG00000058668	ATP2B4	ENSG00000178573	MAF	ENSG00000259040	BLOC1S5-TXNDC5	ENSG00000073150	PANX2
ENSG00000149294	NCAM1	ENSG00000134765	DSC1	ENSG00000122986	HVCN1	ENSG00000115590	IL1R2
ENSG00000115604	IL18R1	ENSG00000021300	PLEKHB1	ENSG00000138639	ARHGAP24	ENSG00000174837	EMR1
ENSG00000168209	DDIT4	ENSG00000164300	SERINC5	ENSG00000145088	EAF2	ENSG00000241399	CD302
ENSG00000196154	S100A4	ENSG00000167106	FAM102A	ENSG00000144218	AFF3	ENSG00000178789	CD300LB
ENSG00000167618	LAIR2	ENSG00000089692	LAG3	ENSG00000112182	BACH2	ENSG00000198734	F5
ENSG00000255641	NKG2-E	ENSG00000143502	SUSD4	ENSG00000104894	CD37	ENSG00000120318	ARAP3
ENSG00000168229	PTGDR	ENSG00000108679	LGALS3BP	ENSG00000112149	CD83	ENSG00000187554	TLR5
ENSG00000107742	SPOCK2	ENSG00000146674	IGFBP3	ENSG00000158457	TSPAN33	ENSG00000100504	PYGL
ENSG00000134107	BHLHE40	ENSG00000107281	NPDC1	ENSG00000135916	ITM2C	ENSG00000204482	LST1
ENSG00000206561	COLQ	ENSG00000166750	SLFN5	ENSG00000012124	CD22	ENSG00000140749	IGSF6
ENSG00000176485	PLA2G16	ENSG00000213203	GIMAP1	ENSG00000023445	BIRC3	ENSG00000139318	DUSP6
ENSG00000169252	ADRB2	ENSG00000164530	PI16	ENSG00000159958	TNFRSF13C	ENSG00000105048	TNNT1
ENSG00000113721	PDGFRB	ENSG00000099284	H2AFY2	ENSG00000058091	CDK14	ENSG00000170956	CEACAM3
ENSG00000002586	CD99	ENSG00000156299	TIAM1	ENSG00000028277	POU2F2	ENSG00000136867	SLC31A2
ENSG00000155366	RHOC	ENSG00000106952	TNFSF8	ENSG00000184293	CLECL1	ENSG00000198121	LPAR1
ENSG00000180739	S1PR5	ENSG00000118402	ELOVL4	ENSG00000100473	COCH	ENSG00000169397	RNASE3
ENSG00000196405	EVL	ENSG00000141576	RNF157	ENSG00000227507	LTB	ENSG00000149798	CDC42EP2
ENSG00000158321	AUTS2	ENSG00000139192	TAPBPL	ENSG00000143297	FCRL5	ENSG00000118515	SGK1
ENSG00000101474	APMAP	ENSG00000164512	ANKRD55	ENSG00000135318	NT5E	ENSG00000136999	NOV
ENSG00000150867	PIP4K2A	ENSG00000139679	LPAR6	ENSG00000205302	SNX2	ENSG00000101336	HCK
ENSG00000139112	GABARAPL1	ENSG00000134202	GSTM3	ENSG00000103365	GGA2	ENSG00000073737	DHRS9
ENSG00000163947	ARHGEF3	ENSG00000154153	FAM134B	ENSG00000101017	CD40	ENSG00000035862	TIMP2
ENSG00000153283	CD96	ENSG00000111266	DUSP16	ENSG00000012779	ALOX5	ENSG00000134243	SORT1
ENSG00000118971	CCND2	ENSG00000139537	CCDC65	ENSG00000042980	ADAM28	ENSG00000104918	RETN
ENSG00000174600	CMKLR1	ENSG00000154764	WNT7A	ENSG00000138867	GUCD1	ENSG00000101425	BPI
ENSG00000109062	SLC9A3R1	ENSG00000120875	DUSP4	ENSG00000163683	SMIM14	ENSG00000197249	SERPINA1
ENSG00000189067	LITAF	ENSG00000197457	STMN3	ENSG00000105640	RPL18A	ENSG00000070731	ST6GALNAC2
ENSG00000128340	RAC2	ENSG00000117602	RCAN3	ENSG00000116191	RALGPS2	ENSG00000126262	FFAR2
ENSG00000164674	SYTL3	ENSG00000110944	IL23A	ENSG00000147905	ZCCHC7	ENSG00000205927	OLIG2
ENSG00000170962	PDGFD	ENSG00000134352	IL6ST	ENSG00000149577	SIDT2	ENSG00000149573	MPZL2
ENSG00000162639	HENMT1	ENSG00000128656	CHN1	ENSG00000160856	FCRL3	ENSG00000182022	CHST15
ENSG00000005844	ITGAL	ENSG00000182809	CRIP2	ENSG00000117009	KMO	ENSG00000101236	RNF24
ENSG00000112576	CCND3	ENSG00000138794	CASP6	ENSG00000117322	CR2	ENSG00000170458	CD14
ENSG00000169896	ITGAM	ENSG00000050405	LIMA1	ENSG00000165209	STRBP	ENSG00000090376	IRAK3
ENSG00000188042	ARL4C	ENSG00000139610	CELA1	ENSG00000130702	LAMA5	ENSG00000183307	CECR6
ENSG00000115956	PLEK	ENSG00000105289	TJP3	ENSG00000158481	CD1C	ENSG00000137757	CASP5
ENSG00000119714	GPR68	ENSG00000124181	PLCG1	ENSG00000026559	KCNG1	ENSG00000163625	WDFY3
ENSG00000162676	GFI1	ENSG00000090104	RGS1	ENSG00000092820	EZR	ENSG00000165886	UBTD1
ENSG00000176845	METRNL	ENSG00000152270	PDE3B	ENSG00000159128	IFNGR2	ENSG00000111052	LIN7A
ENSG00000124942	AHNAK	ENSG00000135127	CCDC64	ENSG00000144426	NBEAL1	ENSG00000025039	RRAGD
ENSG00000085563	ABCB1	ENSG00000157570	TSPAN18	ENSG00000151748	SAV1	ENSG00000243130	PSG11

## Sheet: Mouse
NK		T-cell		B-cell		Myeloid
Gene ID	Gene Name	Gene ID	Gene Name	Gene ID	Gene Name	Gene ID	Gene Name
ENSMUSG00000089727	Klra8	ENSMUSG00000024670	Cd6	ENSMUSG00000037071	Scd1	ENSMUSG00000026822	Lcn2
ENSMUSG00000067591	Klra3	ENSMUSG00000022994	Adcy6	ENSMUSG00000002007	Srpk3	ENSMUSG00000017737	Mmp9
ENSMUSG00000050241	Klre1	ENSMUSG00000036188	Ankmy2	ENSMUSG00000071042	Rasgrp3	ENSMUSG00000000204	Slfn4
ENSMUSG00000079852	Klra4	ENSMUSG00000036860	Mrpl55	ENSMUSG00000042474	Fcmr	ENSMUSG00000056071	S100a9
ENSMUSG00000023132	Gzma	ENSMUSG00000030283	St8sia1	ENSMUSG00000040592	Cd79b	ENSMUSG00000031722	Hp
ENSMUSG00000067599	Klra7	ENSMUSG00000042345	Ubash3a	ENSMUSG00000024673	Ms4a1	ENSMUSG00000030144	Clec4d
ENSMUSG00000030361	Klrb1a	ENSMUSG00000038128	Camk4	ENSMUSG00000005540	Fcer2a	ENSMUSG00000027360	Hdc
ENSMUSG00000032446	Eomes	ENSMUSG00000039178	Tbc1d19	ENSMUSG00000038421	Fcrla	ENSMUSG00000056054	S100a8
ENSMUSG00000030167	Klrc1	ENSMUSG00000049109	Themis	ENSMUSG00000068105	Tnfrsf13c	ENSMUSG00000032484	Ngp
ENSMUSG00000030325	Klrb1c	ENSMUSG00000016028	Celsr1	ENSMUSG00000030724	Cd19	ENSMUSG00000054169	Ceacam10
ENSMUSG00000074874	Ctla2b	ENSMUSG00000054934	Kcnmb4	ENSMUSG00000053931	Cnn3	ENSMUSG00000093973	Mrgpra2a
ENSMUSG00000004612	Nkg7	ENSMUSG00000038742	Angptl6	ENSMUSG00000037548	H2-DMb2	ENSMUSG00000058624	Gda
ENSMUSG00000045087	S1pr5	ENSMUSG00000027611	Procr	ENSMUSG00000026594	Ralgps2	ENSMUSG00000052270	Fpr2
ENSMUSG00000029822	Osbpl3	ENSMUSG00000022748	Cmss1	ENSMUSG00000032053	Pou2af1	ENSMUSG00000021125	Arg2
ENSMUSG00000044258	Ctla2a	ENSMUSG00000027082	Tfpi	ENSMUSG00000073421	H2-Ab1	ENSMUSG00000045551	Fpr1
ENSMUSG00000032899	Styk1	ENSMUSG00000048251	Bcl11b	ENSMUSG00000037972	Snn	ENSMUSG00000059108	Ifitm6
ENSMUSG00000000817	Fasl	ENSMUSG00000062661	Ncs1	ENSMUSG00000030577	Cd22	ENSMUSG00000064246	Chil1
ENSMUSG00000035042	Ccl5	ENSMUSG00000031949	Adat1	ENSMUSG00000034634	Ly6d	ENSMUSG00000041754	Trem3
ENSMUSG00000079298	Klrb1b	ENSMUSG00000025375	Aatk	ENSMUSG00000014453	Blk	ENSMUSG00000052212	Cd177
ENSMUSG00000055170	Ifng	ENSMUSG00000037940	Inpp4b	ENSMUSG00000044827	Tlr1	ENSMUSG00000025804	Ccr1
ENSMUSG00000048376	F2r	ENSMUSG00000029913	Prdm5	ENSMUSG00000000861	Bcl11a	ENSMUSG00000059657	Stfa2l1
ENSMUSG00000030165	Klrd1	ENSMUSG00000023259	Slc26a6	ENSMUSG00000041538	H2-Ob	ENSMUSG00000024164	C3
ENSMUSG00000026068	Il18rap	ENSMUSG00000003099	Ppp5c	ENSMUSG00000021411	Pxdc1	ENSMUSG00000037095	Lrg1
ENSMUSG00000030114	Klrg1	ENSMUSG00000066687	Zbtb16	ENSMUSG00000030313	Dennd5b	ENSMUSG00000028497	Hacd4
ENSMUSG00000001444	Tbx21	ENSMUSG00000039431	Mtmr7	ENSMUSG00000008193	Spib	ENSMUSG00000018927	Ccl6
ENSMUSG00000030149	Klrk1	ENSMUSG00000044313	Mab21l3	ENSMUSG00000026616	Cr2	ENSMUSG00000032496	Ltf
ENSMUSG00000056290	Ms4a4b	ENSMUSG00000039419	Cntnap2	ENSMUSG00000044734	Serpinb1a	ENSMUSG00000068747	Sort1
ENSMUSG00000020644	Id2	ENSMUSG00000105204	Gm43738	ENSMUSG00000047880	Cxcr5	ENSMUSG00000059089	Fcgr4
ENSMUSG00000015437	Gzmb	ENSMUSG00000037493	Cib2	ENSMUSG00000067586	S1pr3	ENSMUSG00000058794	Nfe2
ENSMUSG00000004709	Cd244	ENSMUSG00000024472	Dcp2	ENSMUSG00000052013	Btla	ENSMUSG00000041268	Dmxl2
ENSMUSG00000006800	Sulf2	ENSMUSG00000043421	Hilpda	ENSMUSG00000021423	Ly86	ENSMUSG00000031610	Scrg1
ENSMUSG00000042842	Serpinb6b	ENSMUSG00000039114	Nrn1	ENSMUSG00000036594	H2-Aa	ENSMUSG00000027398	Il1b
ENSMUSG00000020042	Btbd11	ENSMUSG00000017176	Nt5c3b	ENSMUSG00000047139	Cd24a	ENSMUSG00000005800	Mmp8
ENSMUSG00000045827	Serpinb9	ENSMUSG00000096210	H1f0	ENSMUSG00000046110	Serinc4	ENSMUSG00000064147	Rab44
ENSMUSG00000047507	Baiap3	ENSMUSG00000006517	Mvd	ENSMUSG00000037922	Bank1	ENSMUSG00000004609	Cd33
ENSMUSG00000032666	1700025G04Rik	ENSMUSG00000037797	Adh4	ENSMUSG00000073940	Hbb-bt	ENSMUSG00000030148	Clec4a2
ENSMUSG00000030616	Sytl2	ENSMUSG00000006641	Slc5a6	ENSMUSG00000032359	Ctsh	ENSMUSG00000026073	Il1r2
ENSMUSG00000026308	Klhl30	ENSMUSG00000006675	P4htm	ENSMUSG00000059994	Fcrl1	ENSMUSG00000063193	Cd300lb
ENSMUSG00000068129	Cst7	ENSMUSG00000020303	Stc2	ENSMUSG00000060586	H2-Eb1	ENSMUSG00000030142	Clec4e
ENSMUSG00000042082	Arsb	ENSMUSG00000078348	Sf3b5	ENSMUSG00000017652	Cd40	ENSMUSG00000029082	Bst1
ENSMUSG00000034438	Gbp8	ENSMUSG00000019734	Tmc4	ENSMUSG00000069917	Hba-a2	ENSMUSG00000021281	Tnfaip2
ENSMUSG00000024910	Ctsw	ENSMUSG00000002984	Tomm40	ENSMUSG00000057098	Ebf1	ENSMUSG00000040809	Chil3
ENSMUSG00000023961	Enpp4	ENSMUSG00000030523	Trpm1	ENSMUSG00000030872	Gga2	ENSMUSG00000025701	Alox5
ENSMUSG00000062082	Cd200r4	ENSMUSG00000030029	Lrig1	ENSMUSG00000031015	Swap70	ENSMUSG00000050931	Sgms2
ENSMUSG00000030154	Klrb1f	ENSMUSG00000048040	Arxes2	ENSMUSG00000022885	St6gal1	ENSMUSG00000071562	Stfa1
ENSMUSG00000068227	Il2rb	ENSMUSG00000020692	Nle1	ENSMUSG00000074141	Il4i1	ENSMUSG00000060445	Sycp2
ENSMUSG00000068220	Lgals1	ENSMUSG00000024186	Rgs11	ENSMUSG00000010142	Tnfrsf13b	ENSMUSG00000009292	Trpm2
ENSMUSG00000062524	Ncr1	ENSMUSG00000032093	Cd3e	ENSMUSG00000022353	Mtss1	ENSMUSG00000035004	Igsf6
ENSMUSG00000030064	Frmd4b	ENSMUSG00000015337	Endog	ENSMUSG00000040350	Trim7	ENSMUSG00000078817	Nlrp12
ENSMUSG00000026833	Olfm1	ENSMUSG00000000916	Nsun5	ENSMUSG00000043243	Fam129c	ENSMUSG00000017002	Slpi
ENSMUSG00000039899	Fgl2	ENSMUSG00000029468	P2rx7	ENSMUSG00000030468	Siglecg	ENSMUSG00000058427	Cxcl2
ENSMUSG00000030789	Itgax	ENSMUSG00000028555	Ttc39a	ENSMUSG00000034265	Zdhhc14	ENSMUSG00000068587	Mgam
ENSMUSG00000069833	Ahnak	ENSMUSG00000028792	Ak2	ENSMUSG00000051727	Kctd14	ENSMUSG00000045636	Mtus1
ENSMUSG00000000982	Ccl3	ENSMUSG00000036278	Macrod1	ENSMUSG00000035268	Pkig	ENSMUSG00000033777	Tlr13
ENSMUSG00000026778	Prkcq	ENSMUSG00000041362	Shtn1	ENSMUSG00000064267	Hvcn1	ENSMUSG00000031825	Crispld2
ENSMUSG00000031520	Vegfc	ENSMUSG00000079111	Kdelr2	ENSMUSG00000036469	2001-03-01	ENSMUSG00000059900	Tmem40
ENSMUSG00000020593	Lpin1	ENSMUSG00000054191	Klf1	ENSMUSG00000061132	Blnk	ENSMUSG00000021360	Gcnt2
ENSMUSG00000041831	Sytl3	ENSMUSG00000007207	Stx1a	ENSMUSG00000005583	Mef2c	ENSMUSG00000034641	Cd300ld
ENSMUSG00000026070	Il18r1	ENSMUSG00000025037	Maoa	ENSMUSG00000037649	H2-DMa	ENSMUSG00000025330	Padi4
ENSMUSG00000049103	Ccr2	ENSMUSG00000051790	Nlgn2	ENSMUSG00000024334	H2-Oa	ENSMUSG00000035493	Tgfbi
ENSMUSG00000067750	Khdc1a	ENSMUSG00000027456	Sdcbp2	ENSMUSG00000051506	Wdfy4	ENSMUSG00000026579	F5
ENSMUSG00000021108	Prkch	ENSMUSG00000037190	Cyb561d2	ENSMUSG00000028121	Bcar3	ENSMUSG00000046207	Pik3r6
ENSMUSG00000032377	Plscr4	ENSMUSG00000042275	Pelo	ENSMUSG00000075602	Ly6a	ENSMUSG00000026986	Hnmt
ENSMUSG00000000409	Lck	ENSMUSG00000021879	Dnah12	ENSMUSG00000030364	Clec2h	ENSMUSG00000030427	Lilra6
ENSMUSG00000043587	Pxylp1	ENSMUSG00000039055	Eme1	ENSMUSG00000095105	Edaradd	ENSMUSG00000074677	Sirpb1c
ENSMUSG00000040596	Pogk	ENSMUSG00000047061	Gm9817	ENSMUSG00000035000	Dpp4	ENSMUSG00000049999	Ppp1r3d
ENSMUSG00000032231	Anxa2	ENSMUSG00000002661	Alkbh7	ENSMUSG00000029084	Cd38	ENSMUSG00000072875	Gpr27
ENSMUSG00000034377	Tulp4	ENSMUSG00000033295	Ptprf	ENSMUSG00000034041	Lyl1	ENSMUSG00000029821	Dfna5
ENSMUSG00000079227	Ccr5	ENSMUSG00000054072	Iigp1	ENSMUSG00000032698	Lmo2	ENSMUSG00000033508	Asprv1
ENSMUSG00000034613	Ppm1h	ENSMUSG00000031162	Gata1	ENSMUSG00000031258	Xkrx	ENSMUSG00000060063	Alox5ap
ENSMUSG00000027525	Phactr3	ENSMUSG00000038628	Polr3k	ENSMUSG00000015396	Cd83	ENSMUSG00000031497	Tnfsf13b
ENSMUSG00000025597	Klhl4	ENSMUSG00000034947	Tmem106a	ENSMUSG00000021892	Sh3bp5	ENSMUSG00000025491	Ifitm1
ENSMUSG00000049871	Nlrc3	ENSMUSG00000017418	Arl5b	ENSMUSG00000015597	Zfp318	ENSMUSG00000022026	Olfm4
ENSMUSG00000038304	Cd160	ENSMUSG00000027366	Sppl2a	ENSMUSG00000021880	Rnase6	ENSMUSG00000033192	Lpcat2
ENSMUSG00000022657	Cd96	ENSMUSG00000022760	Thap7	ENSMUSG00000020183	Cpm	ENSMUSG00000033170	Card10
ENSMUSG00000050232	Cxcr3	ENSMUSG00000044393	Dsg2	ENSMUSG00000021356	Irf4	ENSMUSG00000025877	Hk3
ENSMUSG00000026991	Pkp4	ENSMUSG00000025489	Ifitm5	ENSMUSG00000052160	Pld4	ENSMUSG00000039542	Ncam1
ENSMUSG00000051457	Spn	ENSMUSG00000060261	Gtf2i	ENSMUSG00000014030	Pax5	ENSMUSG00000055782	Abcd2
ENSMUSG00000021676	Iqgap2	ENSMUSG00000021929	Kpna3	ENSMUSG00000022686	B3gnt5	ENSMUSG00000051748	Wfdc21
ENSMUSG00000028064	Sema4a	ENSMUSG00000027381	Bcl2l11	ENSMUSG00000039783	Kmo	ENSMUSG00000008540	Mgst1
ENSMUSG00000057058	Skap1	ENSMUSG00000020097	Sgpl1	ENSMUSG00000058470	Gm8369	ENSMUSG00000066684	Pilrb1
ENSMUSG00000030579	Tyrobp	ENSMUSG00000039410	Prdm16	ENSMUSG00000047842	Diras2	ENSMUSG00000023913	Pla2g7
ENSMUSG00000039315	Clnk	ENSMUSG00000005225	Plekha8	ENSMUSG00000028459	Cd72	ENSMUSG00000021069	Pygl
ENSMUSG00000022114	Spry2	ENSMUSG00000024667	Tmem216	ENSMUSG00000079547	H2-DMb1	ENSMUSG00000020010	Vnn3
ENSMUSG00000025809	Itgb1	ENSMUSG00000046687	Gm5424	ENSMUSG00000022661	Cd200	ENSMUSG00000069303	Hist1h2br
ENSMUSG00000026014	Raph1	ENSMUSG00000000811	Txnrd3	ENSMUSG00000024675	Ms4a4c	ENSMUSG00000014543	Klra17
ENSMUSG00000028476	Reck	ENSMUSG00000021759	Ppap2a	ENSMUSG00000057069	Ero1lb	ENSMUSG00000005148	Klf5
ENSMUSG00000026009	Icos	ENSMUSG00000052837	Junb	ENSMUSG00000062783	Csprs	ENSMUSG00000017057	Il13ra1
ENSMUSG00000037788	Vopp1	ENSMUSG00000003123	Lipe	ENSMUSG00000035095	Fam167a	ENSMUSG00000043940	Wdfy3
ENSMUSG00000026576	Atp1b1	ENSMUSG00000069910	Spdl1	ENSMUSG00000026399	Cd55	ENSMUSG00000053040	Aph1c
ENSMUSG00000029802	Abcg2	ENSMUSG00000063177	Klk1b27	ENSMUSG00000032028	Nxpe2	ENSMUSG00000022237	Ankrd33b
ENSMUSG00000070291	Ddx43	ENSMUSG00000015023	Ddx19a	ENSMUSG00000038776	Ephx1	ENSMUSG00000042265	Trem1
ENSMUSG00000028927	Padi2	ENSMUSG00000028614	Ndc1	ENSMUSG00000049422	Chchd10	ENSMUSG00000030747	Dgat2
ENSMUSG00000039943	Plcb4	ENSMUSG00000030505	Prmt3	ENSMUSG00000066456	Hmgn3	ENSMUSG00000029484	Anxa3
ENSMUSG00000026384	Ptpn4	ENSMUSG00000067377	Tspan6	ENSMUSG00000048621	Gm6377	ENSMUSG00000033213	AA467197
ENSMUSG00000024659	Anxa1	ENSMUSG00000078816	Prkcg	ENSMUSG00000024353	Mzb1	ENSMUSG00000035783	Acta2
ENSMUSG00000041481	Serpina3g	ENSMUSG00000005882	Uqcc1	ENSMUSG00000051212	Gpr183	ENSMUSG00000036362	P2ry13
ENSMUSG00000045005	Fzd5	ENSMUSG00000053647	Gper1	ENSMUSG00000003283	Hck	ENSMUSG00000039616	Mocos
ENSMUSG00000004633	Chn2	ENSMUSG00000027514	Zbp1	ENSMUSG00000031838	Ifi30	ENSMUSG00000022788	Fgd4
ENSMUSG00000050345	4930486L24Rik	ENSMUSG00000035934	Pknox2	ENSMUSG00000026245	Farsb	ENSMUSG00000005803	Sqrdl
