# Supplementary material for: Single-cell transcriptome analysis of fish immune cells provides insight into the evolution of vertebrate immune cell types
Source: Genome Res. 2017 Mar;27(3):451–61. doi: 10.1101/gr.207704.116 (PMC5340972; doi:10.1101/gr.207704.116)
Supplement: Supplemental Material [file supp_gr.207704.116_Supplemental_Table_S6.xlsx]

## Sheet: Sheet1
Table S5 - Cells where events of V(D)J recombination of TCR beta chain were detected
Cell	V segment	J segment	Cell Cluster
1_15	V_51	J_3	1
1_17	V_17	J_17	1
1_20	V_18	J_8	1
1_27	V_26	J_12	1
1_36	V_19	J_7	1
1_44	V_6	J_31	2
1_45	V_2	J_15	1
1_47	V_6	J_16	1
1_51	V_38	J_15	1
1_53	V_49	J_2	1
1_54	V_28	J_11	1
1_61	V_1	J_14	1
1_68	V_17	J_20	1
1_80	V_14	J_30	2
1_86	V_16	J_28	1
7_29	V_46	J_28	1
7_6	V_34	J_13	2
7_60	V_2	J_4	1
7_67	V_29	J_15	1
7_9	V_22	J_19	2
8_11	V_50	J_28	2
8_36	V_48	J_31	1
8_51	V_17	J_23	1
8_54	V_28	J_33	1
8_64	V_10	J_7	1
8_85	V_51	J_30	1
8_88	V_17	J_7	1
